# Supplementary material for: DNA methylation perturbations may link altered development and aging in the lung
Source: Aging (Albany NY). 2021 Jan 19;13(2):1742–64. doi: 10.18632/aging.202544 (PMC7880367; doi:10.18632/aging.202544)
Supplement: Supplementary Table 1 [file aging-13-202544-s002.xlsx]

## Sheet: Sheet1
Supplementary Table 1. Differentially methylated CpGs associated with age in the fetal lung tissue dataset (94,834 CpGs; FDR adjusted P-Value < 0.05).											.
CG site	Gene	CHR	MAPINFO	Relation_to_Island	RefGene_Group	DMR	Enhancer	Regulatory_Feature_Group	DHS	Regression-coefficient	AveBeta	P.Value	adj.P.Val
cg14651082		12	125145939	S_Shore			NA		NA	0.00401151	0.25834	1.6659e-37	5.81991e-32
cg00964751	C17orf96	17	36828900	N_Shore	1stExon	RDMR	NA		NA	0.00475025	0.323434	9.65896e-37	1.55468e-31
cg01821043	CASZ1	1	10766044	S_Shore	5'UTR		NA		NA	0.00476592	0.601354	2.08984e-36	1.55468e-31
cg03955927	LOC100132215	2	63272232	Island	Body		TRUE		NA	0.00698703	0.664003	2.1909e-36	1.55468e-31
cg05457903	PLEC1	8	145052304	Island	TSS1500		NA		NA	0.00400678	0.27873	2.22507e-36	1.55468e-31
cg03389701	DLEU7	13	51418221	S_Shore	TSS1500	RDMR	NA	Unclassified_Cell_type_specific	NA	0.00444604	0.46912	5.03288e-36	2.93044e-31
cg25133130	MAP3K6	1	27687685	Island	Body		NA		NA	0.00363639	0.431773	1.7901e-35	8.93402e-31
cg09018299	TNRC6A	16	24748339	OpenSea	Body		TRUE		NA	-0.00603416	0.724976	4.00657e-35	1.74964e-30
cg24025567	CUX1	7	101505662	OpenSea	Body		TRUE		NA	0.00315116	0.474679	6.37716e-35	2.30634e-30
cg11067714	PURA	5	139492230	N_Shore	TSS1500	RDMR	NA		NA	0.00563612	0.342585	6.74075e-35	2.30634e-30
cg14205663	NR2F2	15	96872827	N_Shore	TSS1500	RDMR	NA		NA	0.00466579	0.29084	7.4774e-35	2.30634e-30
cg25903143		11	68920466	OpenSea			TRUE		NA	0.00555768	0.245537	8.32575e-35	2.30634e-30
cg11654900		1	51444685	S_Shore			NA	Promoter_Associated	NA	0.00867599	0.262632	8.58222e-35	2.30634e-30
cg13803234	RAD51L1	14	68830813	OpenSea	Body		TRUE		NA	0.00519081	0.502292	9.64963e-35	2.37534e-30
cg00079023	PURA	5	139492535	N_Shore	TSS1500		NA		NA	0.00300472	0.176295	1.01988e-34	2.37534e-30
cg10681992	TBC1D14	4	6964527	OpenSea	Body		TRUE	Unclassified	NA	0.00392497	0.623522	1.61714e-34	3.53097e-30
cg05878390	MAB21L2	4	151502935	N_Shore	TSS200	RDMR	NA		NA	0.00654663	0.233133	2.35991e-34	4.83703e-30
cg19791727		10	21798015	Island		RDMR	NA		NA	0.00774591	0.550213	2.56953e-34	4.83703e-30
cg22783327	FXYD1	19	35633258	N_Shore	Body		NA	Unclassified	NA	0.00613835	0.296337	2.70641e-34	4.83703e-30
cg06519422	GABBR1	6	29599226	N_Shore	Body	RDMR	NA		NA	0.00422897	0.463518	2.82284e-34	4.83703e-30
cg23475035		14	54686184	OpenSea		RDMR	NA		NA	0.0063392	0.364785	3.04077e-34	4.83703e-30
cg17806418	GABBR1	6	29599319	N_Shore	Body	RDMR	NA		NA	0.00405737	0.284395	3.04603e-34	4.83703e-30
cg03171003		2	111875934	Island		RDMR	NA		NA	0.00735475	0.269026	3.26189e-34	4.9546e-30
cg24141382	CTPS	1	41446726	S_Shore	5'UTR		NA	Promoter_Associated	NA	0.00444706	0.400221	3.48969e-34	5.07975e-30
cg27059698	RAI1	17	17625521	N_Shore	5'UTR	RDMR	TRUE		NA	0.00401086	0.300382	4.06813e-34	5.68488e-30
cg14472181	BRD3	9	136921209	S_Shore	5'UTR		TRUE		TRUE	-0.0100823	0.503719	4.82299e-34	6.48053e-30
cg18094261		3	52216318	OpenSea			TRUE		NA	0.00430201	0.703104	9.27449e-34	1.12874e-29
cg23922520	AGAP1	2	236580152	Island	Body		NA		NA	0.00365246	0.211387	9.27716e-34	1.12874e-29
cg10975863	RAD51L1	14	68830704	OpenSea	Body		TRUE		NA	0.00626188	0.60817	9.36968e-34	1.12874e-29
cg10404717	MIR219-2	9	131154962	Island	Body		NA		NA	0.00420373	0.333279	1.35277e-33	1.57533e-29
cg00982136	CLK1	2	201726139	N_Shelf	Body	RDMR	NA		NA	-0.0087285	0.451045	1.47065e-33	1.65735e-29
cg13868473	MAD1L1	7	2105385	N_Shore	Body		NA	Gene_Associated_Cell_type_specific	NA	0.00651109	0.572574	1.7259e-33	1.88422e-29
cg15782852	KCNQ1	11	2742507	OpenSea	Body		TRUE		NA	0.00471329	0.518688	2.07541e-33	2.19714e-29
cg06757048	TP53I11	11	44973218	S_Shore	TSS1500		NA	Unclassified	NA	0.00464278	0.825299	2.55152e-33	2.62173e-29
cg05438837	CRYL1	13	20980132	OpenSea	Body		TRUE		NA	0.00382355	0.360574	2.78465e-33	2.77952e-29
cg20968678	TMEM169	2	216948982	S_Shelf	5'UTR		NA	Unclassified_Cell_type_specific	TRUE	0.00452431	0.225782	2.89325e-33	2.8077e-29
cg09598552	CDH23	10	73417893	OpenSea	Body		TRUE		NA	0.00621208	0.438232	3.293e-33	3.10926e-29
cg05030346	INPP5A	10	134596943	N_Shore	3'UTR		TRUE		NA	0.00773481	0.770687	5.05254e-33	4.64508e-29
cg09973105	RNF175	4	154681532	S_Shore	TSS200		NA		NA	0.00340862	0.355987	5.46446e-33	4.89497e-29
cg06638529	ERI3	1	44704073	OpenSea	Body		NA	Unclassified	TRUE	0.00459221	0.477788	5.66368e-33	4.94659e-29
cg02872373		7	129418058	N_Shore		RDMR	NA		NA	0.00453086	0.317388	6.84929e-33	5.83618e-29
cg27641482	GPR124	8	37652957	N_Shore	TSS1500		TRUE		NA	0.00395288	0.567098	8.19171e-33	6.81384e-29
cg09606807		15	96579908	OpenSea			TRUE		NA	0.0034401	0.319787	1.04347e-32	8.47772e-29
cg06524120		15	77841106	OpenSea			TRUE		NA	0.00306816	0.351808	1.168e-32	9.27381e-29
cg18852574	RBMS1	2	161265289	S_Shore	Body	RDMR	NA		NA	0.00628659	0.40541	1.35494e-32	1.0519e-28
cg07627317		3	61517101	OpenSea			TRUE		NA	0.00479076	0.704758	1.49431e-32	1.13488e-28
cg09693106	C22orf26	22	46449821	Island	1stExon		NA		NA	-0.00627542	0.450893	1.58512e-32	1.17411e-28
cg06614002	SOX10	22	38380439	S_Shore	1stExon		NA		NA	0.00502252	0.342803	1.61318e-32	1.17411e-28
cg00024494		16	73096842	N_Shore		RDMR	NA		NA	0.00718945	0.240788	1.69188e-32	1.20626e-28
cg08825645		16	54325319	Island			NA		NA	0.00657637	0.251533	1.76672e-32	1.23442e-28
cg18898336	RGS12	4	3392103	OpenSea	Body		TRUE		NA	0.00530259	0.706761	1.86752e-32	1.27927e-28
cg09103877	RAI1	17	17713067	Island	Body		NA	Unclassified_Cell_type_specific	TRUE	0.00592188	0.468571	1.96816e-32	1.30492e-28
cg01572940		2	45398381	S_Shore		RDMR	NA	Unclassified_Cell_type_specific	NA	0.00646982	0.309458	1.97967e-32	1.30492e-28
cg14738670	FXYD1	19	35633444	Island	Body		NA	Unclassified	NA	0.00639051	0.205981	2.18474e-32	1.39037e-28
cg09331651		16	87100066	OpenSea			NA		NA	0.00454964	0.573658	2.1889e-32	1.39037e-28
cg06261500	SND1	7	127484663	OpenSea	Body		TRUE		NA	-0.00512515	0.841745	2.27465e-32	1.41904e-28
cg00682263	MEGF11	15	66188803	OpenSea	3'UTR		NA		NA	-0.0116509	0.601723	2.46795e-32	1.51262e-28
cg12580783	WNT10B	12	49362475	N_Shore	Body	RDMR	NA	Unclassified_Cell_type_specific	NA	0.00666263	0.557646	2.5394e-32	1.52957e-28
cg07237830	BSCL2	11	62474725	S_Shore	5'UTR	RDMR	NA		NA	0.00380341	0.341111	2.70315e-32	1.60061e-28
cg08163918	SHMT2	12	57628654	N_Shore	3'UTR		NA	Gene_Associated_Cell_type_specific	NA	0.00353609	0.715279	2.8087e-32	1.63016e-28
cg11613003	FZD7	2	202901288	S_Shore	1stExon		NA		NA	0.00397735	0.227841	2.86735e-32	1.63016e-28
cg08241360	FAM125B	9	129244738	Island	Body		TRUE		NA	0.00407028	0.235804	2.92738e-32	1.63016e-28
cg08232572		10	134596989	N_Shore			TRUE		NA	0.0102558	0.656964	2.9397e-32	1.63016e-28
cg07945618	LRRC28	15	99926398	OpenSea	3'UTR		TRUE		NA	-0.00547655	0.575199	3.01729e-32	1.64704e-28
cg08741843		4	1031015	S_Shore			NA		NA	0.00371116	0.550704	3.21751e-32	1.72931e-28
cg24994127	RALGAPA2	20	20433328	Island	Body		TRUE	Promoter_Associated	NA	0.00428826	0.221502	3.64425e-32	1.929e-28
cg07072704	FBLN1	22	45899736	S_Shore	Body		NA		NA	0.0049324	0.225023	4.298e-32	2.21865e-28
cg12963656	LOC152225	3	101659687	OpenSea	TSS200		TRUE		TRUE	0.00443423	0.209836	4.35714e-32	2.21865e-28
cg03684807		22	46457384	Island			TRUE		TRUE	0.00807251	0.52878	4.38199e-32	2.21865e-28
cg12874792	RAD51L1	14	68831098	OpenSea	Body		TRUE		NA	0.00737354	0.367035	4.44606e-32	2.21894e-28
cg13105599		15	67356641	N_Shore		RDMR	NA		NA	0.00628015	0.251583	4.7258e-32	2.32185e-28
cg05932042	PLEKHH3	17	40822653	Island	Body		NA		NA	0.00591136	0.541854	4.78521e-32	2.32185e-28
cg24119717		5	139488731	S_Shore		RDMR	NA		NA	0.00698577	0.418185	4.91832e-32	2.35375e-28
cg15809959	SRCIN1	17	36720382	S_Shore	Body		NA	Unclassified_Cell_type_specific	TRUE	0.00681282	0.219106	6.17273e-32	2.91416e-28
cg08551333	MAD1L1	7	1894025	N_Shelf	Body		NA		NA	0.00403804	0.512878	6.74056e-32	3.09824e-28
cg01446515	GJB6	13	20805443	N_Shore	5'UTR		TRUE		NA	0.00416242	0.134344	6.79403e-32	3.09824e-28
cg12222588	BRUNOL4	18	34823808	Island	3'UTR		NA		NA	0.00592429	0.170448	6.82871e-32	3.09824e-28
cg03157115	RBMS1	2	161265247	S_Shore	Body		NA		NA	0.00442006	0.399401	7.23097e-32	3.22734e-28
cg04305601	ZNF423	16	49699992	OpenSea	Body		TRUE		NA	0.00422864	0.320679	7.29802e-32	3.22734e-28
cg01765653	GABBR1	6	29599160	N_Shore	Body	RDMR	NA		NA	0.00396219	0.41165	7.54013e-32	3.29273e-28
cg27038634		8	49468341	N_Shore		RDMR	TRUE		NA	0.00329794	0.155297	7.639e-32	3.29452e-28
cg02977388	RNLS	10	90253615	OpenSea	Body		TRUE		NA	0.0047008	0.165834	7.73284e-32	3.29452e-28
cg02931762		16	54325015	N_Shore		CDMR	NA		NA	0.0039985	0.264703	8.19193e-32	3.44806e-28
cg03723270	MYO3B	2	171361326	OpenSea	Body		TRUE		NA	0.00454049	0.488034	8.67339e-32	3.60725e-28
cg02697649	FZD7	2	202901045	Island	1stExon		NA		NA	0.00551061	0.219112	9.21964e-32	3.78933e-28
cg17295878	TBC1D16	17	77924665	S_Shore	Body	RDMR	NA	Unclassified_Cell_type_specific	NA	0.0072233	0.533217	1.06073e-31	4.30897e-28
cg13200550	RPSAP52	12	66221789	S_Shore	TSS1500		NA		NA	0.00742606	0.253928	1.16225e-31	4.66616e-28
cg04196298	SLC43A2	17	1480710	S_Shore	Body		TRUE		TRUE	-0.0043476	0.171584	1.17706e-31	4.66616e-28
cg08324801		17	38263416	OpenSea			TRUE	Promoter_Associated	NA	0.00282857	0.170584	1.18873e-31	4.66616e-28
cg11577355	AFF3	2	100722474	S_Shore	TSS1500	RDMR	TRUE		NA	0.00385565	0.344505	1.2428e-31	4.77931e-28
cg08111857	CNTNAP1	17	40840012	Island	Body		NA		NA	0.00778488	0.451165	1.24491e-31	4.77931e-28
cg18761422		15	96886238	N_Shore		RDMR	TRUE		NA	0.0033047	0.0955155	1.4678e-31	5.57373e-28
cg11510043	MBNL2	13	97934205	OpenSea	Body		TRUE		NA	-0.00504636	0.82001	1.5117e-31	5.67871e-28
cg13922800	LOC100129066	9	92310441	OpenSea	Body		TRUE		NA	0.00551432	0.262372	1.58001e-31	5.87218e-28
cg23058673	TNRC18	7	5422234	OpenSea	Body		TRUE		TRUE	0.00368441	0.426759	1.69778e-31	6.24344e-28
cg06867571	LTBP3	11	65306934	Island	Body		NA		NA	0.00455215	0.397395	1.74016e-31	6.33263e-28
cg21335378		2	173150101	OpenSea			TRUE		TRUE	0.00309397	0.140027	1.93937e-31	6.98484e-28
cg02233459	MEGF6	1	3460467	S_Shore	Body		NA	Unclassified_Cell_type_specific	NA	0.00408904	0.55797	2.02703e-31	7.22606e-28
cg14525247	MIR219-2	9	131154899	Island	Body		NA		NA	0.00498604	0.306274	2.08709e-31	7.36501e-28
cg18105842	FGF11	17	7341440	N_Shore	TSS1500		TRUE	Unclassified	NA	0.0055532	0.326853	2.15712e-31	7.49437e-28
cg12562461	LOC146880	17	62778131	S_Shore	TSS1500		NA		NA	0.00429345	0.713629	2.16665e-31	7.49437e-28
cg00896182		14	54686589	OpenSea		RDMR	TRUE		NA	0.00510746	0.500074	2.203e-31	7.54539e-28
cg26094554	SRCIN1	17	36719654	Island	Body		NA	Unclassified_Cell_type_specific	NA	0.00530861	0.251516	2.23096e-31	7.56698e-28
cg18129282		10	89987284	OpenSea			TRUE		NA	0.00396184	0.343489	2.28582e-31	7.6785e-28
cg12350863	GPR160	3	169758289	S_Shore	5'UTR	RDMR	NA		NA	0.00439854	0.216873	2.31008e-31	7.68609e-28
cg12883980		13	50707586	Island			TRUE		NA	0.00508816	0.262751	2.39437e-31	7.89138e-28
cg23200506	APOA4	11	116694171	S_Shore	TSS200		NA		NA	0.00238	0.206432	2.77021e-31	9.04474e-28
cg23097878	CRY2	11	45879730	OpenSea	Body		TRUE		TRUE	-0.00860018	0.467611	2.966e-31	9.59433e-28
cg20670923	VAPA	18	9915771	S_Shore	Body		NA	Promoter_Associated_Cell_type_specific	NA	-0.00522665	0.494236	3.0729e-31	9.84891e-28
cg00602416		10	21797819	Island			NA		NA	0.00695322	0.41816	3.12431e-31	9.92267e-28
cg18363035	GJB6	13	20805385	N_Shore	5'UTR		TRUE		NA	0.00469409	0.300789	3.52232e-31	1.10859e-27
cg23651872	TBC1D16	17	77924733	S_Shore	Body	RDMR	NA	Unclassified_Cell_type_specific	NA	0.00523566	0.381452	3.57472e-31	1.11504e-27
cg26224018	CACHD1	1	64942153	OpenSea	Body		TRUE		NA	-0.00586617	0.430334	3.71751e-31	1.14932e-27
cg13754720	PTCH1	9	98274853	S_Shore	Body	RDMR	NA		NA	0.00446021	0.286346	3.75782e-31	1.15159e-27
cg03611487	LOC100126784	11	19737237	S_Shore	TSS1500	RDMR	TRUE		TRUE	0.00510338	0.474677	3.91574e-31	1.18955e-27
cg09480047		16	54325129	Island		RDMR	NA		NA	0.00822317	0.334397	4.10958e-31	1.23767e-27
cg25953930		6	41462541	OpenSea			TRUE		NA	0.00270074	0.105414	4.39517e-31	1.31237e-27
cg06859463	CREB3L1	11	46300215	Island	Body		NA	Unclassified	TRUE	0.0019932	0.101583	4.76148e-31	1.4097e-27
cg25251459	LOC151534	2	74731371	S_Shore	Body		NA		NA	0.00333486	0.453544	5.07357e-31	1.48788e-27
cg04635504	KCNQ1	11	2829241	S_Shore	Body		NA		NA	-0.00418032	0.787415	5.11072e-31	1.48788e-27
cg01262952	ANKRD1	10	92680914	OpenSea	1stExon		TRUE		TRUE	0.00391421	0.317885	5.23906e-31	1.51264e-27
cg19859729	TSPAN9	12	3281556	OpenSea	5'UTR		NA		NA	0.00470022	0.419932	5.42479e-31	1.55342e-27
cg08911543	TMEM120A	7	75620548	N_Shelf	Body		NA		TRUE	0.00520851	0.467405	5.54225e-31	1.5634e-27
cg21007509	RAD51L1	14	68831210	OpenSea	Body		TRUE		NA	0.00539758	0.207049	5.54914e-31	1.5634e-27
cg21844144		11	68920550	OpenSea			TRUE		NA	0.00509001	0.416609	5.66304e-31	1.58273e-27
cg11803251	LIMCH1	4	41659108	OpenSea	Body		TRUE		NA	-0.00576529	0.566014	5.78574e-31	1.59991e-27
cg27109043		8	142247864	OpenSea			NA		NA	-0.00465238	0.864508	5.8161e-31	1.59991e-27
cg09646197	ZNF467	7	149462836	Island	Body		TRUE		NA	0.0050726	0.562875	6.37446e-31	1.73981e-27
cg15480897	LRBA	4	151505467	S_Shore	Body	RDMR	NA		NA	0.00682727	0.259787	6.74517e-31	1.82671e-27
cg03722909	SETBP1	18	42324965	Island	Body		NA		NA	0.0050759	0.638329	6.85254e-31	1.84151e-27
cg24527194	RFX1	19	14073463	Island	3'UTR		NA		NA	0.00434562	0.345264	7.01995e-31	1.8721e-27
cg26920007		16	679347	S_Shore			TRUE		NA	0.00353117	0.448969	7.11282e-31	1.8825e-27
cg06011086		8	61823275	S_Shore		RDMR	NA	Promoter_Associated	NA	0.00424861	0.487311	7.73082e-31	2.0236e-27
cg12991385	GABBR1	6	29599259	N_Shore	Body	RDMR	NA		NA	0.00314942	0.228706	7.76179e-31	2.0236e-27
cg08889776	ZFAND3	6	38105691	OpenSea	Body		TRUE		NA	0.00541879	0.4465	8.65652e-31	2.23604e-27
cg20812722		1	25525951	OpenSea			TRUE		NA	0.00344445	0.536203	8.70466e-31	2.23604e-27
cg16473915	HTRA4	8	38831702	Island	1stExon		TRUE		NA	0.00326813	0.16148	9.19148e-31	2.33254e-27
cg09637449	C10orf105	10	73479754	OpenSea	5'UTR		TRUE		NA	0.00371157	0.578433	9.21385e-31	2.33254e-27
cg23122901	TXNRD2	22	19880135	OpenSea	Body	DMR	TRUE		NA	0.00336065	0.273392	9.6102e-31	2.41538e-27
cg17053963		3	44063832	Island			NA		NA	0.00450072	0.146198	9.76955e-31	2.43789e-27
cg21172497	PCSK5	9	78510119	S_Shelf	Body		NA		NA	0.00634593	0.662963	1.00323e-30	2.48569e-27
cg11644052	NFU1	2	69665132	S_Shore	TSS1500		NA	Promoter_Associated	NA	-0.00733824	0.314142	1.02602e-30	2.52426e-27
cg02893260	MTUS2	13	30071603	OpenSea	Body		TRUE		NA	0.0029533	0.207516	1.06433e-30	2.60021e-27
cg18699466	RUNX2	6	45415640	OpenSea	Body		TRUE		NA	0.00240169	0.418188	1.07898e-30	2.61769e-27
cg27258399	HTRA4	8	38832267	Island	Body		TRUE		NA	0.00611637	0.240865	1.10406e-30	2.66006e-27
cg13367234	CROCC	1	17253197	OpenSea	Body		TRUE	Unclassified_Cell_type_specific	TRUE	0.00749368	0.5017	1.11837e-30	2.67609e-27
cg19871173		1	229997842	OpenSea			TRUE		NA	0.00479955	0.266373	1.16252e-30	2.7628e-27
cg04196143		2	162096032	Island			NA		NA	0.0057135	0.733943	1.26873e-30	2.99485e-27
cg22571654	MED12L	3	150805388	S_Shore	Body		NA		NA	0.00585679	0.396797	1.32334e-30	3.0856e-27
cg08211145	CACNA2D1	7	82074180	S_Shore	TSS1500	RDMR	TRUE		NA	0.00395917	0.626192	1.32484e-30	3.0856e-27
cg12747056	VAV2	9	136726575	N_Shore	Body		NA		NA	0.00512372	0.7569	1.34596e-30	3.11402e-27
cg20380368	TLE3	15	70342278	OpenSea	3'UTR		NA		NA	0.00323853	0.54879	1.42442e-30	3.27294e-27
cg26457075		2	7843941	OpenSea			TRUE		NA	0.00491419	0.372401	1.43338e-30	3.27294e-27
cg14059464		2	241901988	N_Shelf			NA		NA	0.00524646	0.29215	1.49837e-30	3.39741e-27
cg11106117		5	139491230	N_Shore		RDMR	NA		NA	0.00683636	0.260023	1.51298e-30	3.39741e-27
cg22534097	ANKRD1	10	92681082	OpenSea	TSS200		NA		TRUE	0.00490225	0.563301	1.51707e-30	3.39741e-27
cg27059598		10	21797661	Island		RDMR	NA		NA	0.0063179	0.582614	1.6719e-30	3.72029e-27
cg22353096		2	100851666	OpenSea			TRUE	Unclassified_Cell_type_specific	NA	0.00341387	0.397556	1.73049e-30	3.8263e-27
cg21549750		15	96483912	OpenSea			TRUE		NA	0.004181	0.715683	1.7563e-30	3.85895e-27
cg22522920	FAIM2	12	50276512	OpenSea	Body		TRUE		NA	0.00258172	0.362468	1.77253e-30	3.87027e-27
cg15111638		11	16631993	N_Shore		RDMR	NA		NA	0.00559304	0.448567	1.81243e-30	3.9328e-27
cg20413392	MIR219-2	9	131155013	Island	TSS200		NA		NA	0.00450617	0.364837	1.98228e-30	4.2748e-27
cg05370101		2	43188839	OpenSea			NA	Unclassified_Cell_type_specific	NA	0.00431258	0.283777	2.04443e-30	4.38179e-27
cg02036387		11	65197533	OpenSea			NA		NA	-0.00549441	0.530668	2.14702e-30	4.57361e-27
cg00868875	KCTD1	18	24127237	Island	5'UTR		NA	Unclassified_Cell_type_specific	NA	0.00430609	0.241136	2.20178e-30	4.66184e-27
cg07015525	SETBP1	18	42325086	S_Shore	Body		NA		NA	0.0065889	0.803559	2.48691e-30	5.23382e-27
cg07105478		17	77767485	S_Shore			NA		NA	0.00432696	0.290411	2.56439e-30	5.36457e-27
cg12195314		19	2491255	S_Shore			NA		TRUE	-0.00528832	0.725852	2.63227e-30	5.4738e-27
cg06370069	CHST3	10	73728417	S_Shelf	5'UTR		NA		NA	0.0041351	0.349238	2.73673e-30	5.65733e-27
cg14904733	MAB21L2	4	151501623	S_Shore	TSS1500	RDMR	NA		NA	0.010096	0.398993	2.77326e-30	5.6987e-27
cg25441207	GPR176	15	40163012	OpenSea	Body		TRUE		NA	0.00562248	0.671395	2.80257e-30	5.6987e-27
cg24881289	PLEKHH3	17	40822424	Island	Body		NA	Promoter_Associated_Cell_type_specific	NA	0.00397419	0.576167	2.82303e-30	5.6987e-27
cg08059678	VAC14	16	70728425	OpenSea	Body		TRUE		TRUE	0.00325619	0.573044	2.83115e-30	5.6987e-27
cg02580005	LRBA	4	151504187	Island	Body	RDMR	TRUE		NA	0.0068382	0.236964	2.8383e-30	5.6987e-27
cg23575603		13	50707753	Island			TRUE		NA	0.00671724	0.595377	2.87469e-30	5.73879e-27
cg11787522	STRA6	15	74495109	OpenSea	5'UTR		NA		TRUE	0.00397317	0.144257	2.95778e-30	5.87112e-27
cg09521647	AFF3	2	100722408	S_Shore	TSS1500	RDMR	TRUE		NA	0.00358984	0.267794	3.14994e-30	6.21721e-27
cg08162124	ATP11A	13	113428094	N_Shore	Body		NA	Unclassified_Cell_type_specific	NA	-0.00875337	0.772028	3.29696e-30	6.47083e-27
cg04566512		22	46457588	Island			TRUE		TRUE	0.0103657	0.629836	3.46341e-30	6.74906e-27
cg13279476	SH3BP5	3	15372965	N_Shore	Body		NA	Promoter_Associated_Cell_type_specific	NA	0.00536967	0.16481	3.47735e-30	6.74906e-27
cg19506623	RBMS1	2	161265259	S_Shore	Body		NA		NA	0.00547135	0.203924	3.57544e-30	6.90109e-27
cg08041350	KSR1	17	25819112	OpenSea	5'UTR		TRUE		NA	0.00583863	0.517811	3.61594e-30	6.94093e-27
cg16356622	EIF2C1	1	36351841	S_Shelf	Body		TRUE		NA	0.00440232	0.352087	3.70022e-30	7.06389e-27
cg03127104	GABBR1	6	29599250	N_Shore	Body	RDMR	NA		NA	0.00333601	0.26435	3.79665e-30	7.20858e-27
cg14537332	SHANK2	11	70508113	N_Shore	Body		TRUE		TRUE	0.00639003	0.319671	3.91317e-30	7.38964e-27
cg19649900	SBNO2	19	1155030	Island	5'UTR		TRUE		NA	-0.0046824	0.406133	4.11346e-30	7.72612e-27
cg14488390	AKAP2	9	112812363	S_Shore	Body		NA		NA	0.00412997	0.138568	4.1403e-30	7.73495e-27
cg11905061	AGAP1	2	236580208	S_Shore	Body		NA		NA	0.0048313	0.581478	4.22608e-30	7.8532e-27
cg09868374		15	82217218	OpenSea			TRUE		NA	-0.00793139	0.628496	4.33961e-30	7.98833e-27
cg11385353	AGXT	2	241808113	OpenSea	TSS200		NA		TRUE	0.00241803	0.295025	4.34453e-30	7.98833e-27
cg13720737		13	113611494	OpenSea		CDMR	TRUE		NA	0.00314712	0.316722	4.59867e-30	8.41135e-27
cg02362017		9	131154347	Island			NA		NA	0.0115814	0.661981	4.67323e-30	8.5032e-27
cg13780542	SMARCA2	9	2047160	N_Shore	Body		NA		NA	0.00761614	0.668105	4.79612e-30	8.68106e-27
cg19127638	TET1	10	70322442	S_Shore	5'UTR	CDMR	NA		NA	0.00620665	0.257662	4.82067e-30	8.68106e-27
cg14476101	PHGDH	1	120255992	S_Shore	Body	RDMR	NA		NA	0.00278075	0.329553	4.90823e-30	8.79341e-27
cg05654096	NUAK1	12	106477691	OpenSea	Body		TRUE		NA	0.00347143	0.494346	4.9725e-30	8.86311e-27
cg26549330		22	46471442	S_Shelf		RDMR	NA		NA	-0.00639772	0.346199	5.06131e-30	8.97561e-27
cg17356056		5	139526226	Island			NA		NA	0.00355472	0.236454	5.35558e-30	9.40396e-27
cg10086659		2	177040226	S_Shore		RDMR	NA		NA	0.00603308	0.400279	5.3567e-30	9.40396e-27
cg18550262		7	72812030	OpenSea			TRUE		NA	0.00368466	0.194347	5.44485e-30	9.51092e-27
cg25036707	SOX10	22	38380487	S_Shore	1stExon		NA		NA	0.00341786	0.289672	5.6429e-30	9.80784e-27
cg20342105	BSCL2	11	62474910	N_Shore	5'UTR	RDMR	NA		NA	0.00516745	0.479696	5.69919e-30	9.85664e-27
cg17751684	SLC38A10	17	79232024	N_Shelf	Body		NA	Unclassified_Cell_type_specific	NA	0.00450814	0.636238	5.74896e-30	9.89374e-27
cg00487187	HHEX	10	94451625	Island	Body	RDMR	NA	Promoter_Associated	NA	0.00733635	0.303411	5.87306e-30	1.00578e-26
cg01346501	NR1D1	17	38254714	N_Shore	Body		TRUE		NA	-0.00459084	0.437957	5.98828e-30	1.0205e-26
cg23632432	SPSB1	1	9380566	OpenSea	5'UTR		TRUE		NA	0.00375377	0.624893	6.56142e-30	1.11275e-26
cg02388882	AGAP11	10	88731631	Island	5'UTR		NA	Promoter_Associated	NA	0.00293837	0.169595	6.78912e-30	1.1458e-26
cg11824945	TRAF5	1	211519171	OpenSea	5'UTR		NA		NA	0.00345146	0.482343	6.98194e-30	1.17268e-26
cg02630477		1	40388223	OpenSea			NA		NA	0.00595662	0.216154	7.04301e-30	1.17728e-26
cg00393050		3	14435541	OpenSea			TRUE		NA	0.00374486	0.646418	7.14389e-30	1.18845e-26
cg27120405		2	6212961	OpenSea			TRUE	Unclassified_Cell_type_specific	NA	0.00442648	0.713079	7.25185e-30	1.2007e-26
cg27214856		22	46473343	OpenSea		CDMR	TRUE		NA	-0.00641675	0.766846	7.59077e-30	1.25088e-26
cg10453071	DOK4	16	57513414	OpenSea	Body		TRUE		NA	0.00508154	0.28516	7.65719e-30	1.25591e-26
cg02205073		16	19175822	N_Shelf			NA		NA	-0.00509539	0.490968	7.74204e-30	1.26389e-26
cg18748374	MYO18A	17	27482619	OpenSea	Body		TRUE	Unclassified_Cell_type_specific	TRUE	0.00376663	0.572381	7.98655e-30	1.29774e-26
cg05343480	ZNF467	7	149463219	Island	Body		NA	Unclassified_Cell_type_specific	NA	0.00518476	0.670662	8.7508e-30	1.41534e-26
cg17798857	UACA	15	70994632	OpenSea	Body		TRUE		NA	0.00697813	0.292767	8.83798e-30	1.42285e-26
cg02236679	WWOX	16	78782477	OpenSea	Body		TRUE		NA	0.00419673	0.665472	8.95274e-30	1.43408e-26
cg18066182	PDE3B	11	14748453	OpenSea	Body		TRUE		NA	0.00424289	0.581539	8.9898e-30	1.43408e-26
cg05786140		4	129292585	OpenSea			TRUE		NA	-0.00477181	0.753991	9.16322e-30	1.45201e-26
cg18030453	LARS2	3	45506216	OpenSea	Body		TRUE	Unclassified_Cell_type_specific	NA	0.00315975	0.46856	9.18535e-30	1.45201e-26
cg12608692	MYO10	5	16742020	OpenSea	Body		NA		NA	0.00540098	0.329068	9.3528e-30	1.47182e-26
cg20633317	WNT11	11	75917251	N_Shore	Body		NA		TRUE	0.00522191	0.150039	9.61657e-30	1.50655e-26
cg08940570	LOXL3	2	74780617	N_Shore	5'UTR		NA	Unclassified	NA	0.00363808	0.338514	9.88676e-30	1.54196e-26
cg12238593	BTN3A3	6	26440340	OpenSea	TSS1500		NA	Promoter_Associated_Cell_type_specific	NA	-0.00710474	0.528204	9.99182e-30	1.55142e-26
cg16118678	KCNK12	2	47755888	OpenSea	Body		TRUE		NA	0.00500569	0.593918	1.00862e-29	1.55737e-26
cg00162859	ASAP1	8	131268256	OpenSea	Body		TRUE		NA	0.00582519	0.247312	1.01193e-29	1.55737e-26
cg11042505		2	15950244	OpenSea			TRUE		NA	0.00297956	0.448625	1.03434e-29	1.58488e-26
cg26403171		5	148507714	OpenSea			TRUE	Unclassified	TRUE	0.00394147	0.399668	1.0416e-29	1.58797e-26
cg00793186	NRG2	5	139283100	N_Shore	Body	RDMR	NA		NA	0.00417048	0.208065	1.04634e-29	1.58797e-26
cg05298458	TBX1	22	19749188	Island	Body		NA		NA	0.00340002	0.174027	1.05e-29	1.58797e-26
cg15091747	RUNX1	21	36262896	Island	Body		NA		NA	0.00481933	0.320889	1.06904e-29	1.6098e-26
cg15244778		11	69048637	OpenSea			TRUE		TRUE	0.0058488	0.505829	1.0848e-29	1.62415e-26
cg10486439		11	68919970	OpenSea			TRUE		NA	0.00728935	0.62348	1.08787e-29	1.62415e-26
cg13447684	MAD1L1	7	1895903	N_Shore	Body		NA	Unclassified_Cell_type_specific	NA	0.00348521	0.685457	1.09267e-29	1.62438e-26
cg02611811	AGAP1	2	236604031	OpenSea	Body		TRUE		NA	0.00427497	0.39886	1.13997e-29	1.68752e-26
cg26226650	GNAI2	3	50276265	S_Shore	Body		TRUE		TRUE	-0.00470448	0.564333	1.14781e-29	1.69195e-26
cg08273750	LOC100133545	11	2011282	N_Shelf	TSS200		NA		NA	0.00342848	0.421562	1.16029e-29	1.69669e-26
cg06599483	DDX54	12	113599358	OpenSea	Body		TRUE		TRUE	0.00226935	0.498335	1.16429e-29	1.69669e-26
cg21870229	PDXK	21	45145841	N_Shelf	Body	CDMR	NA		TRUE	-0.00716457	0.163609	1.16559e-29	1.69669e-26
cg14684854		2	241901865	N_Shelf			NA		NA	0.00431758	0.252645	1.26312e-29	1.83102e-26
cg02859421		19	3465071	S_Shore		RDMR	TRUE		NA	0.00487509	0.657688	1.26905e-29	1.83203e-26
cg23826573	LHX9	1	197886690	N_Shore	5'UTR		TRUE		TRUE	0.00165615	0.0817447	1.29023e-29	1.85493e-26
cg02987635	C10orf11	10	77794658	OpenSea	Body		NA		NA	0.00368871	0.358411	1.31166e-29	1.87801e-26
cg22928599	PNMAL2	19	46999403	S_Shore	TSS1500		NA		TRUE	0.00283748	0.191184	1.40642e-29	2.00547e-26
cg15325704	MGC16275	17	72207518	N_Shore	Body	RDMR	TRUE		NA	0.00296105	0.313555	1.45512e-29	2.0617e-26
cg20092936	TNK2	3	195600311	N_Shore	Body		NA		TRUE	-0.00505551	0.78744	1.45766e-29	2.0617e-26
cg08460812	LOC641518	4	109087419	N_Shore	TSS1500	RDMR	TRUE		NA	0.00556959	0.240535	1.47297e-29	2.07445e-26
cg15835805	SHROOM1	5	132162441	S_Shore	TSS1500		NA	Unclassified_Cell_type_specific	NA	0.00366088	0.327369	1.47855e-29	2.07445e-26
cg19585100	PAPLN	14	73703023	N_Shore	TSS1500	RDMR	NA		NA	0.00288883	0.425638	1.50948e-29	2.10937e-26
cg23963984	DLG5	10	79659038	OpenSea	Body		TRUE		NA	-0.00620191	0.447226	1.53605e-29	2.13796e-26
cg25399162	BRUNOL4	18	34824016	Island	3'UTR		NA		NA	0.00441143	0.222525	1.56934e-29	2.17562e-26
cg10078009	FOXK1	7	4746964	OpenSea	Body	RDMR	TRUE		NA	0.00228006	0.28367	1.58078e-29	2.18283e-26
cg09499849	ACVR1	2	158695158	OpenSea	5'UTR		TRUE		NA	0.00309567	0.147915	1.62119e-29	2.22981e-26
cg14651936		9	137207506	OpenSea			NA		NA	0.00309672	0.37876	1.65464e-29	2.26688e-26
cg02007434	TLL2	10	98210804	OpenSea	Body		TRUE		NA	0.00651424	0.504666	1.68094e-29	2.29392e-26
cg17220116	SOX13	1	204063432	OpenSea	5'UTR		TRUE		NA	0.00294718	0.480231	1.81779e-29	2.47103e-26
cg23674882	LOXL3	2	74780272	N_Shore	5'UTR	CDMR	NA	Unclassified	NA	0.00346038	0.231561	1.93734e-29	2.62334e-26
cg22877452		1	61517876	N_Shore			NA		NA	0.00703058	0.621822	1.97913e-29	2.66957e-26
cg02126031		14	54686316	OpenSea			TRUE		NA	0.00480889	0.365493	2.05751e-29	2.76462e-26
cg17144548		2	5679308	OpenSea			TRUE		NA	0.00474278	0.544597	2.10271e-29	2.81453e-26
cg11334730		6	6750455	OpenSea			TRUE	Unclassified_Cell_type_specific	TRUE	0.00335182	0.292356	2.11572e-29	2.82113e-26
cg11041314		5	139021650	S_Shelf			TRUE		NA	-0.00496987	0.654676	2.21046e-29	2.93625e-26
cg05895353		16	54611722	OpenSea			TRUE		NA	0.00694372	0.250378	2.28651e-29	3.0168e-26
cg25378181	BAHCC1	17	79391490	N_Shore	Body		NA		TRUE	0.00332808	0.487632	2.2962e-29	3.0168e-26
cg04994481		14	65345381	N_Shore		RDMR	NA		NA	0.00529838	0.444906	2.297e-29	3.0168e-26
cg02961101		16	48533155	S_Shelf			NA		TRUE	0.0039781	0.288812	2.41409e-29	3.15871e-26
cg25718696	LRBA	4	151503588	N_Shore	Body	RDMR	NA		NA	0.00685556	0.359979	2.42454e-29	3.16054e-26
cg24044501		10	72056549	OpenSea			TRUE		TRUE	-0.00546553	0.46557	2.43616e-29	3.16388e-26
cg04208329		14	75445376	N_Shelf			NA		NA	0.0028067	0.431414	2.52238e-29	3.26373e-26
cg10585293	POLR3B	12	106884704	OpenSea	Body		TRUE		NA	0.00368853	0.20271	2.59088e-29	3.33999e-26
cg25995955	LRBA	4	151500631	N_Shore	Body	RDMR	TRUE		NA	0.00769371	0.199573	2.84937e-29	3.65971e-26
cg18473733	KLF2	19	16437362	Island	Body	RDMR	NA		NA	0.00380154	0.372783	2.90149e-29	3.713e-26
cg26728422	UNKL	16	1429015	N_Shore	5'UTR		TRUE	Promoter_Associated	NA	0.00349958	0.327386	2.94879e-29	3.75244e-26
cg15198736		5	32709396	N_Shore			NA	Unclassified	NA	0.00522583	0.58553	2.95379e-29	3.75244e-26
cg15989091	LOXL3	2	74780172	N_Shore	5'UTR	CDMR	NA	Unclassified	NA	0.00230765	0.256182	3.02332e-29	3.82685e-26
cg03834031		22	46465717	N_Shore			NA		NA	-0.0065925	0.255748	3.08563e-29	3.89162e-26
cg10689175	C6orf106	6	34625341	OpenSea	Body		TRUE	Promoter_Associated	NA	-0.00685261	0.322172	3.13489e-29	3.93953e-26
cg10136560	MAML3	4	140737518	OpenSea	Body		TRUE		TRUE	0.00538382	0.26655	3.21984e-29	4.02343e-26
cg23964724	KIAA0427	18	46386453	Island	3'UTR		TRUE		NA	0.00351589	0.18298	3.22469e-29	4.02343e-26
cg26631397	GREB1	2	11682864	OpenSea	5'UTR		NA		NA	0.00333845	0.780015	3.25361e-29	4.04507e-26
cg22043381	ZHX2	8	123850540	OpenSea	5'UTR		TRUE		NA	0.00338272	0.519018	3.32303e-29	4.10675e-26
cg03330490	HHEX	10	94452236	Island	Body	RDMR	NA		NA	0.00793068	0.205088	3.32673e-29	4.10675e-26
cg04688330	SH3PXD2A	10	105451802	N_Shore	Body	CDMR	TRUE		TRUE	0.00279652	0.348545	3.44582e-29	4.21969e-26
cg12149795	DIP2A	21	47882121	S_Shelf	Body		NA		NA	-0.00531946	0.677086	3.44843e-29	4.21969e-26
cg13717817	IL17RD	3	57177391	OpenSea	Body		TRUE		NA	0.00339007	0.429044	3.45446e-29	4.21969e-26
cg05356099		17	25603799	OpenSea			TRUE		NA	0.00315537	0.29957	3.51049e-29	4.2732e-26
cg14002772	SMARCA2	9	2047373	Island	Body		NA	Gene_Associated_Cell_type_specific	NA	0.00559903	0.348095	3.54605e-29	4.30149e-26
cg16154713	ASAP1	8	131368433	N_Shore	Body	RDMR	NA		NA	0.00480233	0.882231	3.61625e-29	4.37147e-26
cg12055515	MEIS1	2	66735203	OpenSea	Body		TRUE		NA	0.00295852	0.20097	3.7187e-29	4.47982e-26
cg09203312	GJB6	13	20805196	N_Shore	5'UTR		NA		NA	0.00346312	0.236653	3.74872e-29	4.49492e-26
cg02573472		5	76940356	N_Shore			TRUE	Unclassified_Cell_type_specific	TRUE	0.00249315	0.151866	3.75697e-29	4.49492e-26
cg09772299		2	136783103	OpenSea			TRUE		NA	0.0029725	0.158321	3.77803e-29	4.50469e-26
cg13131455	ZNF467	7	149467944	N_Shore	Body		NA		NA	0.00326514	0.749695	3.92924e-29	4.66601e-26
cg23841186	IGFBP6	12	53492662	S_Shore	Body		NA	Promoter_Associated	NA	0.00371059	0.438624	3.94004e-29	4.66601e-26
cg00957665	TRIM8	10	104406345	S_Shore	Body	RDMR	NA	Promoter_Associated	NA	-0.00326558	0.196242	4.02887e-29	4.74331e-26
cg25950638		15	70451935	OpenSea		DMR	NA		NA	0.00357817	0.471697	4.03247e-29	4.74331e-26
cg21489266	LRRC2	3	46619131	S_Shore	5'UTR		NA		NA	0.00370606	0.357919	4.31591e-29	5.05968e-26
cg27624162		2	111876008	Island		RDMR	NA		NA	0.00532851	0.202833	4.3411e-29	5.07219e-26
cg12357606	CORIN	4	47719380	OpenSea	Body		TRUE		NA	0.00525463	0.309151	4.38061e-29	5.09035e-26
cg00061031	ANP32B	9	100744026	N_Shore	TSS1500	CDMR	NA		NA	0.00356405	0.510781	4.38578e-29	5.09035e-26
cg13283877	MON1A	3	49948232	Island	Body		NA		NA	0.00552737	0.750805	4.4469e-29	5.14419e-26
cg23201812		11	34771918	OpenSea			TRUE		TRUE	-0.00934006	0.578627	4.66828e-29	5.38246e-26
cg03228449	FN1	2	216299545	N_Shore	Body	RDMR	NA		NA	0.00472893	0.167215	4.90214e-29	5.63351e-26
cg25637952	STK10	5	171491194	OpenSea	Body		TRUE		NA	0.00492231	0.588302	5.02205e-29	5.75239e-26
cg25722073	DNM3	1	172351357	OpenSea	Body		TRUE		NA	0.00390039	0.155858	5.06189e-29	5.76442e-26
cg21897676	ATP11A	13	113428161	N_Shore	Body		NA		NA	-0.00657219	0.833887	5.06555e-29	5.76442e-26
cg16669455	CASP4	11	104839343	OpenSea	TSS200		NA	Promoter_Associated	NA	-0.00681967	0.234883	5.23157e-29	5.93401e-26
cg06932415		12	5627841	OpenSea			TRUE		NA	0.00448899	0.628228	5.25811e-29	5.94481e-26
cg19409060	SRCIN1	17	36719518	N_Shore	Body		NA	Unclassified_Cell_type_specific	NA	0.00537303	0.243801	5.35377e-29	6.03344e-26
cg11055493	HHEX	10	94451351	Island	Body	RDMR	NA	Promoter_Associated	NA	0.00536018	0.160072	5.39882e-29	6.06234e-26
cg25304198		13	51168711	OpenSea			TRUE	Unclassified_Cell_type_specific	NA	0.00491263	0.62897	5.41412e-29	6.06234e-26
cg25773695	VANGL1	1	116191657	OpenSea	5'UTR		TRUE	Unclassified_Cell_type_specific	NA	0.00387111	0.421539	5.4319e-29	6.06282e-26
cg10634136	FZD7	2	202901470	S_Shore	1stExon		NA		NA	0.00329744	0.172964	5.67954e-29	6.31903e-26
cg17342469		22	46473074	OpenSea		CDMR	NA		NA	-0.00800874	0.759461	5.92865e-29	6.57525e-26
cg02593958	MEGF11	15	66543899	N_Shore	5'UTR	RDMR	NA	Unclassified	NA	0.00274438	0.391888	5.96811e-29	6.59806e-26
cg17003376	ZNF202	11	123613212	S_Shore	TSS1500		NA		NA	0.00403244	0.639957	6.02514e-29	6.62815e-26
cg15260921		1	226308960	Island			NA		NA	0.00293572	0.396094	6.03326e-29	6.62815e-26
cg01856384		6	41376904	Island		RDMR	NA		NA	0.00262122	0.416249	6.1302e-29	6.69215e-26
cg09245319		2	227049703	OpenSea			TRUE		NA	-0.00749225	0.676501	6.13957e-29	6.69215e-26
cg21574186	UNC5C	4	96445866	OpenSea	Body		NA		NA	0.00447027	0.621248	6.16397e-29	6.69215e-26
cg03075156	PRKCE	2	45986586	OpenSea	Body		TRUE		NA	0.00371626	0.430364	6.16814e-29	6.69215e-26
cg09781936	TBX1	22	19749961	N_Shore	Body		NA		NA	0.00521485	0.742226	6.22077e-29	6.72835e-26
cg27387888		22	19724444	Island			NA		NA	0.00572084	0.241815	6.25102e-29	6.7402e-26
cg21815337	SETMAR	3	4348344	S_Shelf	Body		NA		NA	-0.00708649	0.498679	6.50828e-29	6.996e-26
cg07046546	KCP	7	128550967	S_Shore	TSS200		NA	Unclassified_Cell_type_specific	TRUE	0.00386486	0.578281	6.74099e-29	7.22392e-26
cg12602405		17	79456824	S_Shore			TRUE	Unclassified_Cell_type_specific	NA	0.00932578	0.308849	6.79499e-29	7.25952e-26
cg07739927	LOC146880	17	62778162	S_Shore	TSS1500		NA		NA	0.00484048	0.715229	6.98652e-29	7.44139e-26
cg09703679		5	3592464	Island			TRUE		NA	0.00649629	0.255277	7.05617e-29	7.49273e-26
cg09113483		1	61517807	N_Shore			NA		NA	0.00763024	0.515771	7.20974e-29	7.62528e-26
cg00813264		3	112021179	OpenSea			NA		NA	0.00395666	0.324127	7.22465e-29	7.62528e-26
cg20972453	GJB6	13	20805460	N_Shore	5'UTR		TRUE		NA	0.00413015	0.161816	7.70932e-29	8.11232e-26
cg02100997	PTPRU	1	29585853	N_Shore	Body		NA		TRUE	0.00294712	0.376492	7.80874e-29	8.19226e-26
cg08926365	FYN	6	112007564	OpenSea	Body		TRUE		NA	0.0044763	0.390298	7.89918e-29	8.26233e-26
cg05746014	SOBP	6	107860875	OpenSea	Body		TRUE		NA	0.00410963	0.425438	7.99932e-29	8.3421e-26
cg22078179	KLHL5	4	39063989	OpenSea	5'UTR		TRUE		NA	0.00305098	0.302773	8.16094e-29	8.46053e-26
cg08125539	IGF2BP1	17	47079959	S_Shelf	Body		NA		NA	0.012021	0.350697	8.16132e-29	8.46053e-26
cg05544500		16	54324346	Island		DMR	NA		NA	0.00577878	0.203018	8.19037e-29	8.46553e-26
cg04202892	ACOXL	2	111875749	Island	3'UTR	RDMR	TRUE		NA	0.00634214	0.2125	8.48789e-29	8.74716e-26
cg27340506	PSKH2	8	87082045	Island	TSS200		NA		NA	0.00306173	0.175374	8.55265e-29	8.78798e-26
cg02821871	SPHK2	19	49133598	Island	3'UTR	RDMR	NA	Gene_Associated	NA	0.00391222	0.116975	8.61966e-29	8.83086e-26
cg00116430		1	94188268	OpenSea			TRUE		NA	0.00375844	0.338726	8.75847e-29	8.94682e-26
cg11831003	TRIM6-TRIM34	11	5646029	OpenSea	Body		TRUE	Promoter_Associated	TRUE	-0.00861152	0.33348	8.83805e-29	8.99727e-26
cg08692277	ZNF423	16	49730710	N_Shore	Body		TRUE		NA	0.00311554	0.499199	8.85936e-29	8.99727e-26
cg07268332	AMPD3	11	10476494	S_Shelf	TSS200		NA		TRUE	0.0052006	0.483344	8.89001e-29	9.00224e-26
cg17300723	SLC3A2	11	62647277	N_Shore	Body		NA	Promoter_Associated_Cell_type_specific	NA	-0.00573641	0.236126	8.9269e-29	9.01346e-26
cg16210355		13	107028903	OpenSea			NA	Unclassified_Cell_type_specific	NA	-0.00453499	0.748057	9.14344e-29	9.20549e-26
cg23425762		18	45664130	S_Shore			TRUE	Unclassified_Cell_type_specific	TRUE	0.00458469	0.214993	9.18874e-29	9.22452e-26
cg18661379	SUFU	10	104393081	OpenSea	3'UTR		TRUE		NA	-0.00744188	0.331575	9.2356e-29	9.245e-26
cg14355321	ZHX2	8	123954739	OpenSea	5'UTR		TRUE		NA	0.00411063	0.70516	9.26801e-29	9.25093e-26
cg05305327	CBFA2T2	20	32156436	OpenSea	Body		NA		NA	0.00295435	0.238857	9.37154e-29	9.32762e-26
cg22679406	GABBR1	6	29599331	N_Shore	Body	RDMR	NA		NA	0.00345074	0.312164	9.40286e-29	9.33221e-26
cg19782746	SCAPER	15	76669278	OpenSea	Body		TRUE		NA	0.00432735	0.241404	9.4469e-29	9.34935e-26
cg01849903		3	127263647	N_Shelf			NA	Unclassified	NA	0.00243722	0.298597	9.50018e-29	9.37553e-26
cg20529344		13	50707427	N_Shore		RDMR	NA		NA	0.00558069	0.260961	9.73779e-29	9.58295e-26
cg02789915	GYG1	3	148728409	OpenSea	Body		TRUE		NA	0.00399017	0.57827	1.0603e-28	1.04051e-25
cg16799805	RFX1	19	14073848	Island	Body		NA		NA	0.00377999	0.453643	1.07825e-28	1.05516e-25
cg08124209		6	1622941	N_Shore		RDMR	NA		NA	0.00385413	0.369936	1.09426e-28	1.06783e-25
cg02769206	SSH1	12	109210684	OpenSea	Body		TRUE		NA	-0.00562314	0.531144	1.09845e-28	1.06894e-25
cg20964304	PKNOX2	11	125040416	S_Shelf	5'UTR		TRUE		NA	0.00288215	0.196873	1.13554e-28	1.10196e-25
cg19587318	BCL3	19	45260353	Island	Body		NA		TRUE	0.00449056	0.575394	1.19983e-28	1.15847e-25
cg15416442		14	59244557	OpenSea			TRUE		NA	0.0033494	0.186818	1.2004e-28	1.15847e-25
cg07097310	CBX4	17	77808391	Island	Body		NA		TRUE	0.00423782	0.57191	1.29991e-28	1.25104e-25
cg16385330	LRBA	4	151503878	N_Shore	Body	RDMR	TRUE		NA	0.0081133	0.286726	1.32385e-28	1.27058e-25
cg09328012	LOC400931	22	46481677	N_Shore	TSS200		NA		TRUE	-0.00517999	0.692573	1.35984e-28	1.30155e-25
cg02194243		16	54324597	Island		RDMR	NA		NA	0.00594097	0.181119	1.36993e-28	1.30763e-25
cg08332162		5	92743392	OpenSea			TRUE		NA	0.00354662	0.378399	1.38371e-28	1.31719e-25
cg09028166	NDST1	5	149891393	OpenSea	5'UTR		TRUE	Unclassified_Cell_type_specific	TRUE	0.0036183	0.168934	1.39765e-28	1.32683e-25
cg18402166	LOC146880	17	62778279	S_Shore	TSS1500		NA		NA	0.00347954	0.466716	1.40898e-28	1.33397e-25
cg00075967	STRA6	15	74495354	OpenSea	5'UTR		NA		TRUE	0.00579936	0.307124	1.46593e-28	1.38413e-25
cg25738301	NFYB	12	104532524	Island	TSS1500		NA		NA	0.003409	0.252681	1.50734e-28	1.4194e-25
cg25298189	ARID3A	19	935259	S_Shelf	Body		NA		TRUE	-0.00685536	0.263232	1.59517e-28	1.49807e-25
cg11264539	BSCL2	11	62474940	N_Shore	5'UTR	RDMR	NA		NA	0.00558356	0.534406	1.61914e-28	1.5165e-25
cg25221774	PCCA	13	101173669	OpenSea	Body		NA		NA	0.00545591	0.395204	1.81925e-28	1.69937e-25
cg01333011	PTHLH	12	28124665	S_Shore	5'UTR	RDMR	NA		NA	0.00481297	0.252214	1.83438e-28	1.70893e-25
cg11985480	LOC151534	2	74729100	N_Shore	TSS1500	RDMR	NA	Unclassified_Cell_type_specific	NA	0.00577969	0.352249	1.89993e-28	1.76529e-25
cg07044115		10	123100181	OpenSea			TRUE		NA	0.00338825	0.481336	1.94562e-28	1.80295e-25
cg18519072		2	56185789	OpenSea			TRUE		NA	-0.00515396	0.761526	1.98706e-28	1.83648e-25
cg00534655	PURA	5	139492727	Island	TSS1500		NA		NA	0.00277522	0.16925	2.00142e-28	1.8409e-25
cg21023001	CD93	20	23067088	OpenSea	TSS200		NA	Unclassified_Cell_type_specific	NA	0.00245443	0.228995	2.00238e-28	1.8409e-25
cg12530864		4	188953092	OpenSea			NA		NA	0.00517937	0.415325	2.02371e-28	1.85563e-25
cg02668055	INPP5A	10	134536030	Island	Body		TRUE		NA	0.00418398	0.570205	2.04125e-28	1.86681e-25
cg18436008		10	80535327	OpenSea			TRUE		NA	0.00359645	0.217592	2.05415e-28	1.8737e-25
cg17833106	PVRL4	1	161060000	OpenSea	TSS1500		NA		NA	-0.00393961	0.765481	2.06723e-28	1.88072e-25
cg08894487	ARID3A	19	941243	Island	Body	DMR	TRUE	Unclassified	TRUE	-0.00750302	0.785028	2.08736e-28	1.8941e-25
cg15889768		17	42619247	OpenSea			TRUE		NA	0.00270753	0.41512	2.1093e-28	1.90905e-25
cg17126622	MICALL2	7	1492018	S_Shore	Body		NA		NA	0.00300169	0.549588	2.14015e-28	1.93197e-25
cg04876424	RBM24	6	17280551	N_Shore	TSS1500	RDMR	NA		NA	0.00424171	0.393263	2.23094e-28	2.00874e-25
cg17454263		15	96886397	N_Shore		RDMR	TRUE		NA	0.00568679	0.210406	2.32627e-28	2.08919e-25
cg10001715	WWOX	16	78345421	OpenSea	Body		TRUE	Unclassified_Cell_type_specific	NA	0.00483522	0.691213	2.34879e-28	2.10401e-25
cg01049678	GIMAP8	7	150147536	OpenSea	TSS1500		NA	Unclassified	NA	-0.00335537	0.67653	2.35908e-28	2.10781e-25
cg25438801	DIP2C	10	671497	S_Shelf	Body		TRUE		TRUE	0.00390229	0.527222	2.37408e-28	2.11581e-25
cg24476103	RUNX1T1	8	93108011	OpenSea	TSS1500		TRUE		NA	0.00361539	0.35391	2.3938e-28	2.12795e-25
cg16555909	TCEA3	1	23721285	OpenSea	Body		TRUE		TRUE	0.00348915	0.172322	2.44418e-28	2.16723e-25
cg25487405		22	46473039	OpenSea		CDMR	NA		NA	-0.00584942	0.611095	2.46401e-28	2.17729e-25
cg12174329		8	103646430	OpenSea			TRUE	Unclassified_Cell_type_specific	NA	0.00321082	0.399185	2.468e-28	2.17729e-25
cg10374402	SH2D4B	10	82300600	OpenSea	Body		NA		NA	-0.00528125	0.733808	2.51459e-28	2.20834e-25
cg17671280	TLR3	4	186990202	OpenSea	TSS200		TRUE	Promoter_Associated	NA	-0.00469674	0.261793	2.51583e-28	2.20834e-25
cg07121900		13	50706912	N_Shore		RDMR	NA	Unclassified	NA	0.00464714	0.181795	2.53552e-28	2.22004e-25
cg23173466	MAX	14	65565498	N_Shelf	Body		NA	Promoter_Associated_Cell_type_specific	NA	-0.00605177	0.585968	2.59634e-28	2.26761e-25
cg00118229	PDE9A	21	44088420	N_Shore	Body		NA		NA	0.00389892	0.671582	2.64533e-28	2.30464e-25
cg14689338	MYO10	5	16742054	OpenSea	Body		NA		NA	0.00475673	0.403273	2.66342e-28	2.31462e-25
cg27187555	PRDM16	1	3269252	OpenSea	Body		TRUE		TRUE	0.00479568	0.306062	2.6933e-28	2.33478e-25
cg20334738	MAB21L2	4	151502939	N_Shore	TSS200	RDMR	NA		NA	0.00692459	0.410883	2.71221e-28	2.34536e-25
cg09862509		1	181069576	OpenSea			TRUE	Unclassified_Cell_type_specific	NA	0.00235747	0.386695	2.78582e-28	2.40306e-25
cg22156126		12	48419292	OpenSea			NA		NA	0.00421344	0.387751	2.86334e-28	2.46384e-25
cg06642647		6	30848807	N_Shelf			NA		NA	0.00297557	0.362341	2.87327e-28	2.46632e-25
cg18757468	EHBP1L1	11	65352168	N_Shore	Body		NA		TRUE	0.00495165	0.224161	2.91945e-28	2.49981e-25
cg24674193		1	12598005	N_Shelf			NA		NA	0.00463618	0.729537	2.94229e-28	2.50778e-25
cg05124243		10	22767076	S_Shore		RDMR	NA		NA	0.00640514	0.696863	2.94915e-28	2.50778e-25
cg04771100	HTRA4	8	38832335	Island	Body		TRUE		NA	0.0082275	0.28686	2.95029e-28	2.50778e-25
cg19374752	GRASP	12	52404151	S_Shelf	Body		TRUE	Unclassified_Cell_type_specific	TRUE	0.00235982	0.103064	3.02243e-28	2.56287e-25
cg20481720	MEGF6	1	3450227	S_Shelf	Body		NA	Unclassified_Cell_type_specific	NA	0.00289848	0.574095	3.04592e-28	2.57653e-25
cg07250214		17	77763166	N_Shore		RDMR	NA		NA	0.0056383	0.330083	3.15861e-28	2.6654e-25
cg09709600	EHBP1L1	11	65359521	Island	Body		NA		NA	0.00568418	0.420713	3.1818e-28	2.6785e-25
cg10549986	RSAD2	2	7018153	OpenSea	1stExon		NA	Unclassified_Cell_type_specific	NA	-0.00421176	0.832015	3.37541e-28	2.83466e-25
cg12157387	PARD3B	2	206347777	OpenSea	Body		TRUE		NA	0.00361652	0.273687	3.41712e-28	2.8628e-25
cg04540882		17	27703877	OpenSea			TRUE		TRUE	0.00283211	0.199607	3.57724e-28	2.98978e-25
cg05973772	TRIM2	4	154178277	OpenSea	Body		TRUE		TRUE	0.005148	0.399655	3.64693e-28	3.04075e-25
cg19579344	AGAP1	2	236761550	OpenSea	Body		NA		NA	0.00464274	0.833116	3.72755e-28	3.10057e-25
cg05420057	SRCIN1	17	36721297	S_Shore	Body		TRUE	Unclassified_Cell_type_specific	NA	0.00320221	0.259243	3.76441e-28	3.12379e-25
cg24301866		7	1708659	Island			NA		NA	0.00425605	0.374042	3.79796e-28	3.14416e-25
cg13916928	BSCL2	11	62474735	S_Shore	5'UTR	RDMR	NA		NA	0.00576821	0.80554	4.02098e-28	3.32092e-25
cg00987246		13	79862362	OpenSea			TRUE		NA	0.00344192	0.259441	4.03907e-28	3.32799e-25
cg23965931	STOX2	4	184828386	S_Shore	Body		NA		TRUE	0.00577365	0.212183	4.13971e-28	3.40289e-25
cg02623718	FMN2	1	240565704	N_Shelf	Body		NA		NA	-0.00657847	0.70408	4.20795e-28	3.45086e-25
cg18668540	C10orf105	10	73479848	OpenSea	5'UTR		TRUE		NA	0.00458	0.576248	4.25554e-28	3.48172e-25
cg16329842	MAD1L1	7	2148642	OpenSea	Body		NA		NA	0.00582354	0.661881	4.30665e-28	3.5153e-25
cg14663208	HIVEP3	1	42367407	OpenSea	5'UTR		TRUE		NA	0.00461951	0.641228	4.32211e-28	3.5197e-25
cg22703162		15	96885418	N_Shore		RDMR	NA		NA	0.0061721	0.246187	4.4353e-28	3.60347e-25
cg08486065		19	3464875	Island			TRUE		NA	0.00607187	0.525719	4.49199e-28	3.64106e-25
cg12042952	AFF3	2	100723240	S_Shelf	TSS1500	CDMR	TRUE		NA	0.00436349	0.158862	4.50771e-28	3.64535e-25
cg05429448	LOC152225	3	101659630	OpenSea	TSS200		TRUE		TRUE	0.00423676	0.276255	4.86603e-28	3.92603e-25
cg14307223		2	128221129	OpenSea			TRUE		NA	0.00354848	0.413695	4.92515e-28	3.96458e-25
cg05798664	STK40	1	36825645	OpenSea	Body		TRUE	Unclassified_Cell_type_specific	NA	-0.00456943	0.66566	5.1324e-28	4.12191e-25
cg09645138		5	82155751	OpenSea			TRUE		NA	0.00514829	0.316749	5.16288e-28	4.13306e-25
cg19295314	GMDS	6	1635640	OpenSea	Body		NA		NA	0.00262271	0.301347	5.17832e-28	4.13306e-25
cg14741236		5	171985354	OpenSea			TRUE		NA	0.00357174	0.577082	5.18178e-28	4.13306e-25
cg16421157		6	5036597	OpenSea			TRUE		TRUE	0.00380942	0.563182	5.27115e-28	4.19477e-25
cg12808347		2	11622001	Island			NA		NA	0.00466248	0.656343	5.30418e-28	4.21146e-25
cg04777348	GFI1	1	92952897	S_Shore	TSS1500	RDMR	NA		NA	0.00620429	0.686405	5.35256e-28	4.24023e-25
cg14217091	TRAF3	14	103285756	OpenSea	5'UTR		TRUE	Unclassified_Cell_type_specific	NA	0.00249765	0.509229	5.43476e-28	4.29562e-25
cg10354495	NFU1	2	69665232	S_Shore	TSS1500		NA	Promoter_Associated	NA	-0.00511554	0.763532	5.47412e-28	4.31034e-25
cg20481837	MAB21L2	4	151501627	S_Shore	TSS1500	RDMR	NA		NA	0.0100181	0.418846	5.47807e-28	4.31034e-25
cg20025238	SMO	7	128829789	S_Shore	Body	RDMR	NA		TRUE	0.00230117	0.092122	5.63963e-28	4.42749e-25
cg23532322	BAIAP2	17	79088325	S_Shore	3'UTR		NA	Unclassified_Cell_type_specific	NA	0.00315076	0.274427	5.65754e-28	4.43159e-25
cg08219218	LRBA	4	151503501	N_Shore	Body	RDMR	NA		NA	0.00573308	0.168847	5.70591e-28	4.45948e-25
cg26213368	BSCL2	11	62474978	N_Shore	5'UTR	RDMR	NA		NA	0.00501794	0.519987	5.8133e-28	4.53327e-25
cg14494620		15	96904912	Island			NA		TRUE	0.00732412	0.423523	6.08298e-28	4.733e-25
cg13480549	PRKCZ	1	2058790	OpenSea	5'UTR		NA	Unclassified_Cell_type_specific	NA	-0.00441674	0.753202	6.2227e-28	4.82509e-25
cg01244346	TET3	2	74272962	OpenSea	TSS1500		NA		NA	-0.00443578	0.705346	6.23623e-28	4.82509e-25
cg14333304	ZNF467	7	149461522	N_Shore	3'UTR		NA		NA	0.00520074	0.670849	6.24277e-28	4.82509e-25
cg20892245		6	15244618	N_Shore		RDMR	NA		NA	0.00536303	0.535251	6.34119e-28	4.89034e-25
cg01811583		14	100225060	OpenSea			TRUE		TRUE	0.00278205	0.206446	6.3563e-28	4.8912e-25
cg00833703	KIFC3	16	57809842	OpenSea	Body		TRUE	Unclassified_Cell_type_specific	TRUE	0.00398942	0.671885	6.38377e-28	4.89995e-25
cg04113094		14	54686625	OpenSea		RDMR	TRUE		NA	0.0059097	0.679318	6.4074e-28	4.89995e-25
cg13490575	C9orf3	9	97735830	OpenSea	Body		TRUE		NA	0.00283088	0.459745	6.40975e-28	4.89995e-25
cg10677933	CABIN1	22	24556023	S_Shelf	Body		NA		NA	-0.00315747	0.802782	6.46031e-28	4.92782e-25
cg22265605	LRBA	4	151503546	N_Shore	Body	RDMR	NA		NA	0.00859988	0.395071	6.62258e-28	5.03749e-25
cg15514896		1	229074115	OpenSea			TRUE	Unclassified_Cell_type_specific	NA	0.00278834	0.303408	6.63293e-28	5.03749e-25
cg19634573	FAM53B	10	126397072	OpenSea	5'UTR		TRUE		NA	-0.00485288	0.207102	6.86652e-28	5.20359e-25
cg11886358	FLI1	11	128561007	N_Shore	TSS1500	RDMR	NA		NA	0.00327605	0.429658	7.09929e-28	5.36834e-25
cg16401668		1	48296905	OpenSea			TRUE		NA	0.00498494	0.450057	7.47511e-28	5.64032e-25
cg13726789	GPR124	8	37678323	OpenSea	Body		TRUE		NA	0.00268572	0.369284	7.54919e-28	5.68394e-25
cg27055782	CD81	11	2397486	N_Shore	TSS1500		NA		NA	-0.00366022	0.747425	7.63896e-28	5.73916e-25
cg13550410	KIAA0319L	1	36004549	OpenSea	Body		TRUE	Unclassified	NA	-0.00302304	0.845467	7.71262e-28	5.78207e-25
cg09683258		17	70429180	OpenSea			TRUE		NA	0.0049249	0.308249	7.87077e-28	5.88619e-25
cg20968821	GPR132	14	105522684	OpenSea	5'UTR		TRUE	Gene_Associated_Cell_type_specific	NA	0.00256899	0.222941	7.89545e-28	5.88619e-25
cg02834447		2	237766048	OpenSea			TRUE		NA	0.00430736	0.547827	7.90205e-28	5.88619e-25
cg04878685	PIK3C2G	12	18584312	OpenSea	Body		TRUE		NA	0.00444594	0.565222	7.92198e-28	5.88847e-25
cg19265103	GALNT6	12	51784644	N_Shore	5'UTR	RDMR	NA	Promoter_Associated	NA	0.00302108	0.354517	8.02057e-28	5.94597e-25
cg05241536	RGS10	10	121298236	N_Shelf	Body		NA	Unclassified_Cell_type_specific	NA	0.00326763	0.605401	8.03337e-28	5.94597e-25
cg24512644	ST13	22	41248902	N_Shelf	Body		NA		NA	-0.00648064	0.693366	8.08041e-28	5.96814e-25
cg13718960	RNASE1	14	21271313	OpenSea	TSS1500		NA		NA	-0.00480141	0.762099	8.10083e-28	5.9706e-25
cg07873848	SGPP2	2	223288635	N_Shore	TSS1500	RDMR	NA	Unclassified_Cell_type_specific	NA	0.00390209	0.270995	8.19878e-28	6.03007e-25
cg18593374	LHPP	10	126302546	N_Shore	3'UTR		NA		TRUE	-0.00413104	0.714437	8.24042e-28	6.04444e-25
cg13430450	ABCA1	9	107691064	S_Shore	TSS1500		NA		NA	0.0064711	0.430661	8.25291e-28	6.04444e-25
cg12863565	EBF2	8	25902558	Island	TSS200	CDMR	TRUE		NA	0.00434051	0.161527	8.36724e-28	6.11535e-25
cg16104076	PTGER4	5	40682069	Island	Body		NA		NA	0.00564401	0.233796	8.46056e-28	6.17065e-25
cg20955836	BMP7	20	55836224	N_Shelf	Body	CDMR	NA		NA	0.00417136	0.23332	8.79951e-28	6.40449e-25
cg05723219	FAT1	4	187605157	OpenSea	Body		TRUE		NA	-0.00697068	0.745477	8.90011e-28	6.46423e-25
cg00327697		8	24076220	OpenSea			TRUE		TRUE	-0.00288438	0.0870246	8.93716e-28	6.47768e-25
cg03578926	SHANK2	11	70508032	N_Shore	Body		TRUE		TRUE	0.00510139	0.256143	9.1905e-28	6.64751e-25
cg17095731	LRP8	1	53794313	S_Shore	TSS1500		NA		NA	0.00296709	0.151347	9.36033e-28	6.75636e-25
cg03307717	U2AF1	21	44524639	N_Shelf	5'UTR		NA		NA	-0.00383629	0.617996	9.54896e-28	6.87831e-25
cg08036333		12	116382986	OpenSea			NA		NA	-0.00556948	0.784694	9.68666e-28	6.96313e-25
cg04874286	FGD6	12	95477853	OpenSea	Body		TRUE		NA	0.00404953	0.311987	9.81253e-28	7.03913e-25
cg15262728	ITM2C	2	231733948	S_Shelf	Body	RDMR	NA		NA	0.00464582	0.589987	1.00094e-27	7.16561e-25
cg04153551	FBLN5	14	92363727	OpenSea	Body		TRUE		NA	0.00413587	0.420147	1.00426e-27	7.17472e-25
cg05566455	C11orf45	11	128774523	OpenSea	5'UTR		NA		NA	0.00692615	0.491237	1.00883e-27	7.19266e-25
cg13112407	ARID5A	2	97204931	S_Shore	Body	CDMR	NA		NA	0.00375466	0.687057	1.01206e-27	7.20096e-25
cg16111488	FLJ40852	7	141404769	S_Shelf	Body		NA		NA	0.00333088	0.265229	1.01961e-27	7.23998e-25
cg05162564		5	139491931	N_Shore		RDMR	NA		NA	0.00282727	0.12182	1.02797e-27	7.28449e-25
cg00791854	IL6R	1	154392070	OpenSea	Body		TRUE	Unclassified_Cell_type_specific	TRUE	-0.00438183	0.267838	1.0482e-27	7.41281e-25
cg13601565		10	1200124	OpenSea			NA		NA	0.00569732	0.674016	1.06559e-27	7.5206e-25
cg00068153	CACNA1S	1	201028602	OpenSea	Body		TRUE		NA	0.00383929	0.713855	1.09319e-27	7.69934e-25
cg18172135	DGKG	3	185912486	S_Shore	Body	CDMR	NA		NA	0.00576686	0.238867	1.09532e-27	7.69934e-25
cg17826834	NR2F2	15	96868857	S_Shelf	TSS1500		TRUE		NA	0.00428555	0.130298	1.11557e-27	7.82594e-25
cg07300060		16	54323335	Island			NA		NA	0.00494545	0.131312	1.12369e-27	7.86706e-25
cg01549377	EXD3	9	140215404	N_Shore	Body		NA	Unclassified	NA	0.00277818	0.321785	1.14881e-27	8.02689e-25
cg26150462	CUGBP2	10	11206868	N_Shore	TSS200	CDMR	NA	Promoter_Associated	TRUE	0.00614921	0.234388	1.16647e-27	8.13395e-25
cg13584383	CBX4	17	77808014	Island	Body		NA	Gene_Associated_Cell_type_specific	NA	0.00433542	0.824713	1.1773e-27	8.19315e-25
cg06755438	CCDC108	2	219885614	OpenSea	Body		NA		NA	-0.00465302	0.652111	1.20691e-27	8.3825e-25
cg26929394		11	112435198	OpenSea			TRUE		NA	0.00296295	0.195155	1.20996e-27	8.38698e-25
cg02275418	SH3BP5	3	15372726	N_Shore	Body		NA		NA	0.00475126	0.421721	1.23618e-27	8.55177e-25
cg10477905		2	177039295	N_Shore		RDMR	NA		NA	0.0044061	0.170679	1.25676e-27	8.67696e-25
cg09258479	PDZK1IP1	1	47655861	OpenSea	TSS200		NA		TRUE	-0.00441558	0.537377	1.26231e-27	8.69809e-25
cg22395355	RAI1	17	17713061	Island	Body		NA	Unclassified_Cell_type_specific	NA	0.00549553	0.798551	1.28478e-27	8.8355e-25
cg27629589		2	43295011	N_Shore			TRUE		NA	0.00340222	0.413039	1.33044e-27	9.12811e-25
cg02674693		11	45109122	OpenSea			TRUE		NA	0.00382857	0.576807	1.33255e-27	9.12811e-25
cg16412772		8	65500144	Island		RDMR	NA		NA	0.00523854	0.357843	1.34921e-27	9.22413e-25
cg10864979	PVT1	8	128879141	OpenSea	Body		TRUE		NA	0.00381051	0.736248	1.38816e-27	9.4533e-25
cg21497780	WNT5B	12	1742536	S_Shelf	Body		TRUE		NA	0.00347335	0.554817	1.39063e-27	9.4533e-25
cg11611856	UAP1L1	9	139973337	Island	Body		NA		NA	0.00430468	0.163829	1.39085e-27	9.4533e-25
cg10260192		13	24557080	S_Shelf			NA		NA	0.00338271	0.375375	1.40156e-27	9.50765e-25
cg07622521	ATOH8	2	85992622	OpenSea	Body		TRUE		NA	0.00496021	0.491899	1.42592e-27	9.65412e-25
cg23665802	MIR19A	13	92002338	S_Shore	TSS1500		NA		NA	0.00404765	0.138575	1.43803e-27	9.7173e-25
cg20193839		8	61834501	N_Shore		RDMR	NA		NA	0.0053075	0.674775	1.46463e-27	9.87792e-25
cg08567913	ZBTB16	11	114082594	OpenSea	Body		TRUE		NA	0.00425239	0.218153	1.5208e-27	1.0237e-24
cg07391913	ARHGEF3	3	56818298	OpenSea	Body		TRUE	Promoter_Associated	NA	-0.00665522	0.500042	1.5321e-27	1.02932e-24
cg08289525	ST8SIA2	15	92939006	S_Shore	Body	CDMR	NA		NA	0.00457999	0.47201	1.54429e-27	1.03516e-24
cg04990190		16	73096894	Island		RDMR	NA		NA	0.00585108	0.270353	1.54671e-27	1.03516e-24
cg03724368		17	56024688	OpenSea			TRUE	Unclassified	NA	-0.00583231	0.476251	1.57934e-27	1.05497e-24
cg18299835	NFIX	19	13207445	Island	3'UTR		NA	Unclassified	NA	0.00412824	0.545659	1.66251e-27	1.10841e-24
cg12450823		2	85752248	OpenSea			TRUE	Unclassified_Cell_type_specific	NA	0.00302732	0.398258	1.77547e-27	1.18146e-24
cg09256832	SPSB1	1	9382878	OpenSea	5'UTR		NA		NA	0.0036995	0.592832	1.79026e-27	1.18904e-24
cg00209786		20	56752779	N_Shore			NA		NA	0.00348834	0.647534	1.81864e-27	1.2056e-24
cg08715595	RNF220	1	45009266	OpenSea	Body		TRUE	Unclassified_Cell_type_specific	NA	0.00341008	0.145299	1.88189e-27	1.24517e-24
cg22795345	ARHGEF7	13	111935508	Island	Body		NA		NA	-0.00551645	0.829914	1.91994e-27	1.2677e-24
cg01057705	TXNRD2	22	19892666	N_Shore	Body		TRUE		NA	0.00397949	0.347742	1.9232e-27	1.2677e-24
cg14297772	EN1	2	119605210	Island	1stExon		NA		NA	0.00225934	0.0703028	1.95553e-27	1.28658e-24
cg26312480	IFFO2	1	19246083	OpenSea	Body		NA		NA	0.00332294	0.555578	1.99351e-27	1.30911e-24
cg00218893		17	73073239	N_Shore			NA	Promoter_Associated	NA	0.00263309	0.365801	2.00605e-27	1.31487e-24
cg09579869	CASZ1	1	10738769	OpenSea	Body		NA		NA	0.00395394	0.595921	2.02924e-27	1.32758e-24
cg14435109	SGPP2	2	223288714	N_Shore	TSS1500	RDMR	NA	Unclassified_Cell_type_specific	NA	0.00422213	0.149443	2.07701e-27	1.35629e-24
cg18935453	LRP5	11	68167030	OpenSea	Body		TRUE		NA	-0.00541236	0.250304	2.08612e-27	1.35969e-24
cg12088946	TRIM6-TRIM34	11	5645913	OpenSea	Body		TRUE	Promoter_Associated	TRUE	-0.00342966	0.891559	2.14621e-27	1.39626e-24
cg26073885		12	31506955	OpenSea			TRUE		NA	0.00315089	0.252662	2.17465e-27	1.41212e-24
cg19513987	MAD1L1	7	2105443	N_Shore	Body		NA	Gene_Associated_Cell_type_specific	NA	0.00578727	0.810839	2.1837e-27	1.41537e-24
cg06626168		8	61834373	N_Shore		RDMR	NA		NA	0.00403584	0.380948	2.21102e-27	1.43043e-24
cg18173263	PEMT	17	17465242	Island	Body		NA		TRUE	-0.00383736	0.822334	2.22075e-27	1.43406e-24
cg18573082	PDE7B	6	136425179	OpenSea	Body		TRUE		NA	0.00321349	0.329326	2.23506e-27	1.44064e-24
cg23168192	SLC7A8	14	23624788	OpenSea	Body		TRUE	Unclassified_Cell_type_specific	TRUE	-0.00608962	0.637418	2.26296e-27	1.45594e-24
cg10767554	RORA	15	61404686	OpenSea	Body		TRUE		NA	0.00660509	0.483022	2.32198e-27	1.49117e-24
cg24843443	DDX60L	4	169402197	S_Shore	TSS1500	RDMR	NA	Promoter_Associated	TRUE	-0.00653596	0.302939	2.35277e-27	1.50817e-24
cg13295262		2	177355072	Island			TRUE		NA	0.00290015	0.387447	2.37961e-27	1.52258e-24
cg23330668		2	218016461	OpenSea			TRUE		NA	0.00402989	0.48373	2.42227e-27	1.54704e-24
cg16093296	EBF3	10	131660649	OpenSea	Body		NA		NA	-0.0038076	0.850165	2.46217e-27	1.56966e-24
cg02205072	TXNRD3IT1	3	126328430	OpenSea	TSS1500		NA		NA	-0.00326708	0.897874	2.48404e-27	1.58071e-24
cg01141838	BSCL2	11	62474744	S_Shore	5'UTR	RDMR	NA		NA	0.00501596	0.687905	2.49047e-27	1.58193e-24
cg13725172	ARMC2	6	109267293	OpenSea	Body		TRUE		NA	-0.00495503	0.313884	2.53958e-27	1.61019e-24
cg21767759	ITGA3	17	48154356	OpenSea	Body		NA		NA	0.00249758	0.174517	2.5987e-27	1.64469e-24
cg27313492	WFIKKN1	16	679543	S_Shore	TSS1500		TRUE		NA	0.00293391	0.404985	2.63513e-27	1.66393e-24
cg15913157	PARD3B	2	206223286	OpenSea	Body		TRUE		NA	0.00647483	0.6381	2.63862e-27	1.66393e-24
cg00549219		5	177370476	N_Shore			NA		NA	0.00265583	0.240088	2.68527e-27	1.6883e-24
cg06302818		13	50708043	S_Shore		RDMR	TRUE		NA	0.00371588	0.885835	2.68694e-27	1.6883e-24
cg03613649	FGF11	17	7341191	N_Shore	TSS1500		TRUE		NA	0.00239444	0.166896	2.7252e-27	1.70927e-24
cg16811455	KCNQ1	11	2742553	OpenSea	Body		TRUE		NA	0.00329955	0.372145	2.74663e-27	1.71962e-24
cg05438708	CMIP	16	81520178	OpenSea	Body		NA		TRUE	-0.00409163	0.567958	2.86453e-27	1.79023e-24
cg05392244		6	1575286	OpenSea			TRUE		NA	0.00355968	0.39824	2.88418e-27	1.79929e-24
cg25075776		6	30848828	N_Shelf			NA		NA	0.00281265	0.265661	2.8972e-27	1.80419e-24
cg20528837	EXOSC7	3	45052889	OpenSea	3'UTR		TRUE		TRUE	-0.00622366	0.659582	2.92673e-27	1.81914e-24
cg12069309	SEMA3B	3	50312913	Island	Body		TRUE	Unclassified_Cell_type_specific	NA	0.00582779	0.175468	2.93161e-27	1.81914e-24
cg06012347		11	65066368	OpenSea			TRUE		NA	0.0031928	0.235589	3.06667e-27	1.89957e-24
cg05697726	PSMB8	6	32812933	S_Shore	TSS1500		NA	Promoter_Associated	NA	0.00527095	0.762967	3.16084e-27	1.95443e-24
cg26318265		11	1990435	N_Shore			TRUE	Unclassified_Cell_type_specific	NA	0.0021358	0.0908083	3.22191e-27	1.98689e-24
cg11609556	FLJ90757	17	79006044	N_Shore	Body		NA		NA	-0.00438397	0.671701	3.22471e-27	1.98689e-24
cg16107907	DPY19L2P2	7	102921442	Island	TSS1500		NA		NA	0.00451467	0.145479	3.30439e-27	2.0324e-24
cg13856573	BSCL2	11	62475078	N_Shore	5'UTR	RDMR	NA		NA	0.00362132	0.502645	3.3319e-27	2.04572e-24
cg21129531	LRRC4	7	127670703	N_Shore	5'UTR	RDMR	NA		TRUE	0.00287678	0.275619	3.35744e-27	2.05778e-24
cg26942801	C5orf39	5	43039410	N_Shore	1stExon	DMR	NA		NA	0.00824716	0.401785	3.36872e-27	2.05976e-24
cg15726169	LRRC1	6	53661064	S_Shore	Body		NA		NA	0.00311352	0.185527	3.37245e-27	2.05976e-24
cg21960191	LOC100132215	2	63271537	N_Shore	Body	RDMR	NA		NA	0.00750954	0.614114	3.40599e-27	2.07661e-24
cg16398956		14	100212958	OpenSea		DMR	NA	Unclassified_Cell_type_specific	NA	-0.00388371	0.28458	3.44639e-27	2.09758e-24
cg25865120	DUT	15	48625058	S_Shore	Body		NA	Unclassified	NA	0.00269719	0.130268	3.45423e-27	2.0987e-24
cg24787755	HHEX	10	94451016	N_Shore	Body	RDMR	NA		NA	0.00479618	0.355198	3.4942e-27	2.1193e-24
cg14987431		10	94455650	Island			NA		TRUE	0.00380687	0.24354	3.50506e-27	2.1222e-24
cg11461236	KCP	7	128551065	S_Shore	TSS1500		NA		NA	0.00425445	0.685845	3.51951e-27	2.12726e-24
cg08035195	RBMS1	2	161262014	N_Shore	Body		TRUE		NA	0.00349554	0.429385	3.52742e-27	2.12836e-24
cg24306177		2	202988297	OpenSea			NA		NA	0.00416299	0.165866	3.55241e-27	2.13975e-24
cg00831237	AQP2	12	50344289	OpenSea	TSS1500		NA		NA	0.0041334	0.307549	3.62098e-27	2.17729e-24
cg01337391		16	54324358	Island		DMR	NA		NA	0.00517984	0.148046	3.66848e-27	2.20207e-24
cg25165060	TMTC1	12	29891306	OpenSea	Body		TRUE		NA	-0.00412944	0.847114	3.7208e-27	2.22964e-24
cg12441066	MSI2	17	55456535	OpenSea	Body		TRUE	Unclassified_Cell_type_specific	NA	0.00385779	0.442434	3.78712e-27	2.26549e-24
cg24216701	CDX1	5	149545928	N_Shore	TSS1500		NA		NA	0.002826	0.520072	3.8103e-27	2.27546e-24
cg10763374	COMMD3	10	22608858	S_Shelf	Body	RDMR	NA	Promoter_Associated_Cell_type_specific	NA	0.0102886	0.656033	3.90541e-27	2.32828e-24
cg10570754	NTF3	12	5589444	OpenSea	Body		TRUE		NA	0.0034076	0.360323	4.06561e-27	2.41966e-24
cg21631918	STRA6	15	74501549	OpenSea	TSS200		TRUE		TRUE	0.00209893	0.116765	4.09565e-27	2.43339e-24
cg00574412	ABHD15	17	27892866	N_Shore	Body	RDMR	NA		NA	0.00308489	0.51235	4.2147e-27	2.49688e-24
cg10996589	NCOR2	12	125017134	OpenSea	5'UTR		TRUE		NA	0.00337027	0.234587	4.2168e-27	2.49688e-24
cg07078114	FAM69B	9	139606202	N_Shore	TSS1500		NA	Unclassified_Cell_type_specific	NA	0.0045242	0.238582	4.23007e-27	2.5005e-24
cg13204699		13	50703841	Island			NA	Unclassified_Cell_type_specific	TRUE	0.00293219	0.124077	4.25285e-27	2.50972e-24
cg04259001	TRAPPC9	8	141097242	OpenSea	Body		TRUE		NA	0.00204165	0.158364	4.29622e-27	2.53104e-24
cg02075410	LRBA	4	151504138	Island	Body	RDMR	TRUE		NA	0.00878679	0.318608	4.33408e-27	2.54905e-24
cg19605931		18	8662653	S_Shelf			TRUE		NA	0.00330209	0.473541	4.37653e-27	2.56952e-24
cg01504447	HMGB1	13	31041221	OpenSea	TSS1500	RDMR	NA		NA	0.00485463	0.53319	4.3836e-27	2.56952e-24
cg14479301	CRB2	9	126119975	OpenSea	Body		TRUE		NA	0.0031217	0.307218	4.43345e-27	2.59438e-24
cg04718845	SYNE1	6	152623094	N_Shore	Body	DMR	NA	Promoter_Associated	TRUE	0.00505817	0.243639	4.44785e-27	2.59846e-24
cg12160087	CCDC64	12	120531986	N_Shelf	3'UTR		TRUE		TRUE	0.00290458	0.252077	4.4708e-27	2.60751e-24
cg14213439	SLC5A10	17	18864841	OpenSea	Body		TRUE	Unclassified	NA	0.00472046	0.750236	4.53428e-27	2.64012e-24
cg19143990	LYSMD2	15	52029152	N_Shore	Body		NA	Promoter_Associated	TRUE	0.00400114	0.507297	4.55978e-27	2.65055e-24
cg09175009	FAM18A	16	10912699	Island	TSS200		NA		NA	0.00258401	0.251642	4.60389e-27	2.67163e-24
cg06885782	KCNQ4	1	41248209	N_Shore	TSS1500		NA		NA	0.00243054	0.135799	4.6185e-27	2.67163e-24
cg13536080		11	85659096	OpenSea			TRUE	Unclassified_Cell_type_specific	NA	-0.00762914	0.249337	4.62168e-27	2.67163e-24
cg01588725	GMDS	6	1708629	OpenSea	Body		NA		NA	0.00359185	0.617767	4.63256e-27	2.67163e-24
cg14640670	PURA	5	139494937	S_Shore	3'UTR		NA		NA	0.00257387	0.468167	4.63428e-27	2.67163e-24
cg12816936		3	128806370	OpenSea			NA		NA	-0.00596283	0.385128	4.65862e-27	2.67837e-24
cg14084689	SORCS2	4	7657708	OpenSea	Body		NA		NA	0.00338219	0.247349	4.6613e-27	2.67837e-24
cg13692543	RUSC2	9	35510933	OpenSea	5'UTR		TRUE		NA	-0.00584192	0.253536	4.7135e-27	2.70392e-24
cg18346576		2	27938071	OpenSea			NA		NA	0.00359878	0.163088	4.72446e-27	2.70576e-24
cg00866953	KIAA1026	1	15417078	OpenSea	Body		TRUE		TRUE	0.00257681	0.120997	4.91346e-27	2.8094e-24
cg22280148		8	37561332	S_Shelf			TRUE		NA	0.00394235	0.40346	4.92223e-27	2.80981e-24
cg03033796	CDH23	10	73445156	OpenSea	Body		TRUE		NA	0.00369007	0.517914	5.02248e-27	2.85958e-24
cg01876176		11	24260751	OpenSea			TRUE		NA	-0.00566459	0.516893	5.02578e-27	2.85958e-24
cg02398629		15	70283067	OpenSea			TRUE		NA	0.00294243	0.344297	5.06797e-27	2.87889e-24
cg09138892	FLJ90757	17	79005662	N_Shore	Body		NA		NA	-0.00439149	0.801719	5.10244e-27	2.89377e-24
cg16848072		3	134182665	OpenSea			TRUE		NA	0.00329052	0.449131	5.21242e-27	2.95136e-24
cg25104437	SIX3	2	45170725	Island	Body	RDMR	NA		NA	0.00349581	0.445112	5.25681e-27	2.97167e-24
cg14078714	C9orf3	9	97711748	OpenSea	Body		TRUE		NA	0.00374716	0.232101	5.27723e-27	2.9784e-24
cg05653018	ELF3	1	201979533	OpenSea	TSS200		TRUE	Unclassified	TRUE	0.0028136	0.165512	5.29705e-27	2.98207e-24
cg11538810	LOC400931	22	46481727	N_Shore	TSS200		NA		TRUE	-0.00351686	0.68539	5.30081e-27	2.98207e-24
cg07618409	MSI2	17	55742491	OpenSea	Body		TRUE		NA	0.00241082	0.310867	5.37975e-27	3.02137e-24
cg16107105	KCNH2	7	150646704	N_Shore	Body		NA	Unclassified_Cell_type_specific	TRUE	0.00352862	0.584132	5.38797e-27	3.02137e-24
cg15420678	LOC100132354	6	43901543	OpenSea	Body		TRUE		NA	0.00345379	0.31218	5.40459e-27	3.02583e-24
cg15451980	RORA	15	60959637	OpenSea	Body		TRUE		NA	0.0066615	0.566554	5.45165e-27	3.04705e-24
cg25308508		5	3592638	Island			TRUE		NA	0.00661899	0.308891	5.45993e-27	3.04705e-24
cg21215325	AQR	15	35178803	OpenSea	Body		TRUE		NA	-0.00685829	0.590102	5.52381e-27	3.07778e-24
cg18057306	MIPEP	13	24417943	OpenSea	Body		TRUE		NA	0.00226087	0.373488	5.70816e-27	3.17544e-24
cg07618085	TBC1D16	17	77924582	S_Shore	Body	RDMR	NA	Unclassified_Cell_type_specific	NA	0.00343638	0.503159	5.86259e-27	3.25259e-24
cg14759565		11	65360123	Island			NA		NA	0.00559237	0.429711	5.86546e-27	3.25259e-24
cg10028434	KLC1	14	104160076	OpenSea	Body		NA		NA	-0.0031885	0.69179	5.95377e-27	3.29632e-24
cg13858394		12	52476073	S_Shore			TRUE	Unclassified	NA	0.00280575	0.377252	6.06773e-27	3.3541e-24
cg02147797	PRICKLE2	3	64211204	OpenSea	TSS200		TRUE	Unclassified_Cell_type_specific	TRUE	0.00375351	0.350571	6.13066e-27	3.38354e-24
cg24073393	TMEM102	17	7340867	Island	3'UTR		TRUE	Promoter_Associated	NA	0.00309205	0.313039	6.19245e-27	3.41224e-24
cg10061342	C1orf21	1	184357556	S_Shore	5'UTR		NA	Promoter_Associated_Cell_type_specific	TRUE	0.00355496	0.111085	6.22629e-27	3.42352e-24
cg01831771	ATP11A	13	113428172	N_Shore	Body		NA		NA	-0.00736506	0.736349	6.23251e-27	3.42352e-24
cg08855449	ZIC1	3	147125962	N_Shore	TSS1500	RDMR	NA		NA	0.00256273	0.147061	6.28463e-27	3.44673e-24
cg20036706	EBF3	10	131711529	OpenSea	Body		TRUE		NA	0.00290492	0.279397	6.39068e-27	3.4994e-24
cg04742977	TTC7B	14	91127460	OpenSea	Body		TRUE		NA	-0.00393107	0.831082	6.49246e-27	3.54957e-24
cg18787802	ECT2L	6	139190700	OpenSea	Body		TRUE		NA	0.00339085	0.318348	6.67015e-27	3.64102e-24
cg10397932	SKI	1	2166155	OpenSea	Body		NA	Promoter_Associated	TRUE	-0.00414708	0.268053	6.68718e-27	3.64462e-24
cg05618222	BFSP2	3	133174926	OpenSea	Body		NA		NA	0.00290995	0.280117	6.83267e-27	3.71811e-24
cg26681628		16	54210550	OpenSea			NA		NA	0.00339207	0.31119	6.8548e-27	3.72435e-24
cg21314603	LOC100271832	2	33152037	OpenSea	TSS200		TRUE		NA	0.00403307	0.266926	7.03061e-27	3.81394e-24
cg20322977	CYP26C1	10	94821085	Island	1stExon		NA		NA	0.00322085	0.250136	7.32135e-27	3.9655e-24
cg16243532		3	138617437	OpenSea			TRUE		NA	-0.00873851	0.274814	7.38593e-27	3.99429e-24
cg26748278	TNS3	7	47548113	OpenSea	5'UTR		TRUE		NA	0.00430877	0.802979	7.41883e-27	4.00588e-24
cg07038342	PLSCR4	3	145969625	S_Shore	TSS1500		NA		NA	-0.00849015	0.392822	7.50549e-27	4.04642e-24
cg04049008		8	49438558	OpenSea			TRUE		NA	0.00294401	0.267174	7.55541e-27	4.06706e-24
cg00795000	PGF	14	75423131	S_Shore	TSS1500		NA		NA	0.0030323	0.561867	7.61148e-27	4.09094e-24
cg21553700	TNK2	3	195600410	N_Shore	Body		NA		TRUE	-0.00571002	0.869957	7.64728e-27	4.10386e-24
cg09075743	MAD1L1	7	2105368	N_Shore	Body		NA	Gene_Associated_Cell_type_specific	NA	0.0040511	0.417392	7.73009e-27	4.14194e-24
cg04528771	ABHD15	17	27893087	Island	Body	RDMR	NA		NA	0.00242554	0.230527	7.84799e-27	4.19867e-24
cg01021631		1	56902689	OpenSea			TRUE		NA	0.00339245	0.385268	7.89164e-27	4.21557e-24
cg06663615	BAHCC1	17	79423959	N_Shore	Body		TRUE		TRUE	0.00511813	0.450647	7.95019e-27	4.24036e-24
cg13781158	CNIH2	11	66046838	S_Shore	Body		TRUE		TRUE	0.00820601	0.53878	8.21636e-27	4.37565e-24
cg03192874	ITGAV	2	187474432	OpenSea	Body		TRUE		NA	0.00324822	0.556716	8.36191e-27	4.44495e-24
cg26456435		16	31053788	Island			TRUE		NA	0.00384531	0.221374	8.37193e-27	4.44495e-24
cg11685223	GZF1	20	23344170	N_Shore	TSS1500		NA	Promoter_Associated	NA	-0.00421595	0.590817	8.39427e-27	4.45005e-24
cg26497342	PROZ	13	113812858	OpenSea	TSS200		NA		NA	0.00227563	0.173335	8.40857e-27	4.45087e-24
cg22540532		4	140518177	OpenSea			TRUE		NA	0.00355338	0.262384	8.4534e-27	4.46783e-24
cg00653650		10	102245802	S_Shelf			TRUE		NA	0.00284023	0.150824	8.46731e-27	4.46843e-24
cg04470557	SLC22A4	5	131630995	S_Shore	Body		NA	Promoter_Associated	NA	0.00344854	0.283422	8.60952e-27	4.53662e-24
cg26339943	HHIP	4	145571234	S_Shelf	Body		NA		NA	0.00444095	0.165563	8.75685e-27	4.6073e-24
cg20312012	FER1L5	2	97331035	OpenSea	Body		TRUE		TRUE	-0.00577791	0.756557	8.91417e-27	4.68302e-24
cg14101976	UNC5C	4	96445972	OpenSea	Body		NA		NA	0.00328061	0.481096	9.02855e-27	4.73024e-24
cg14930320		6	170534614	S_Shelf			TRUE		TRUE	0.00354056	0.228782	9.03112e-27	4.73024e-24
cg21854560	ABLIM2	4	8082084	OpenSea	Body		TRUE		NA	0.00442103	0.269567	9.16761e-27	4.79454e-24
cg18499339	KLHL26	19	18761423	Island	Body	RDMR	TRUE		TRUE	0.00239569	0.198697	9.19681e-27	4.80262e-24
cg14305701	INPP5A	10	134527922	Island	Body		NA		TRUE	0.00373985	0.688839	9.22819e-27	4.81181e-24
cg17904575	PPP2R5C	14	102290370	OpenSea	Body		TRUE		NA	-0.00700841	0.464566	9.44325e-27	4.91661e-24
cg03012726		7	113722758	N_Shelf		RDMR	NA		NA	0.00360449	0.127907	9.48635e-27	4.9317e-24
cg21748138		2	174251551	OpenSea			TRUE		NA	0.00553322	0.745126	9.74838e-27	5.06039e-24
cg02183025		2	45159504	N_Shore		RDMR	NA	Unclassified_Cell_type_specific	NA	0.00515199	0.369102	9.94215e-27	5.15333e-24
cg23008973	LINGO1	15	77915770	OpenSea	Body		TRUE		TRUE	0.00314012	0.515935	1.00062e-26	5.17886e-24
cg16499416	MACROD1	11	63766286	Island	3'UTR		NA		NA	0.00622035	0.736746	1.01179e-26	5.2289e-24
cg26999775	KIAA0284	14	105347803	N_Shelf	Body		NA		TRUE	0.00390341	0.675839	1.01687e-26	5.2474e-24
cg08761535	ZNRF1	16	75079000	OpenSea	Body		TRUE		NA	-0.00533936	0.627672	1.02902e-26	5.30224e-24
cg17131262	HUNK	21	33247276	S_Shore	Body		TRUE	Unclassified	NA	0.00282367	0.157593	1.03113e-26	5.30531e-24
cg12728606	AFAP1	4	7903970	OpenSea	5'UTR		TRUE		NA	0.00333646	0.891366	1.03463e-26	5.31547e-24
cg25161129	WIPI1	17	66452343	N_Shore	Body	RDMR	NA		NA	-0.0069687	0.196386	1.04926e-26	5.38276e-24
cg17983632		6	1621930	S_Shore		RDMR	NA		NA	0.0107414	0.700119	1.05835e-26	5.42141e-24
cg17331566	B4GALT2	1	44444305	N_Shore	TSS1500		NA		NA	0.00217719	0.435283	1.06899e-26	5.46792e-24
cg12069151	PPP1R10	6	30580546	OpenSea	5'UTR		TRUE		NA	-0.00487333	0.565453	1.08803e-26	5.55713e-24
cg11087049	NIN	14	51296586	N_Shore	5'UTR		NA		NA	0.00432289	0.207783	1.10153e-26	5.61789e-24
cg15699524	FGF18	5	170845610	N_Shore	TSS1500		NA	Unclassified	NA	0.00329997	0.521402	1.10512e-26	5.6184e-24
cg03173722	RUFY3	4	71587640	OpenSea	Body		TRUE		TRUE	0.00263844	0.130211	1.10575e-26	5.6184e-24
cg04862321	PPP1R10	6	30580928	N_Shelf	5'UTR		TRUE		NA	-0.00404584	0.529341	1.10671e-26	5.6184e-24
cg12230883	EIF4G1	3	184035527	S_Shelf	Body		NA		NA	-0.00322229	0.848283	1.10806e-26	5.6184e-24
cg02420027		13	41632640	N_Shore			NA		NA	-0.00281336	0.760763	1.12893e-26	5.71588e-24
cg05726109	2020-09-05	22	19709755	Island	Body		NA		NA	0.00351197	0.373339	1.14733e-26	5.80064e-24
cg24064594	GYPC	2	127414827	S_Shore	Body	RDMR	TRUE	Promoter_Associated	TRUE	0.0048185	0.209906	1.18552e-26	5.98508e-24
cg08101771		2	223180401	N_Shelf			NA		NA	0.00534831	0.411416	1.18984e-26	5.99819e-24
cg12694224		6	15244693	N_Shore		RDMR	NA		NA	0.00396018	0.183399	1.20091e-26	6.04532e-24
cg06691520	LGI1	10	95517738	OpenSea	5'UTR		NA		NA	0.00348869	0.332294	1.21128e-26	6.08747e-24
cg26974444	SNX29	16	12214807	S_Shelf	Body		TRUE		NA	0.00265555	0.449342	1.21277e-26	6.08747e-24
cg02100410	LOC151534	2	74731354	S_Shore	Body		NA		NA	0.00269544	0.231286	1.22219e-26	6.12594e-24
cg04292442	LRRC20	10	72124092	OpenSea	Body		TRUE	Unclassified	NA	-0.00858398	0.550281	1.23265e-26	6.16954e-24
cg01901332	ARRB1	11	75031054	OpenSea	Body		TRUE	Unclassified_Cell_type_specific	NA	-0.00321001	0.717438	1.26656e-26	6.33015e-24
cg06152215	CCDC92	12	124422259	S_Shore	Body		TRUE	Unclassified	NA	-0.00389568	0.863025	1.27119e-26	6.34423e-24
cg09115116	P2RY6	11	72982950	OpenSea	5'UTR		TRUE		NA	0.00262188	0.361196	1.27507e-26	6.35454e-24
cg16385335	IL18BP	11	71710614	OpenSea	TSS200		TRUE		NA	-0.00331426	0.439849	1.31053e-26	6.52192e-24
cg23742233		15	96890880	S_Shore		RDMR	NA		NA	0.00273394	0.414296	1.31461e-26	6.53295e-24
cg00746308	C21orf125	21	44868948	OpenSea	TSS1500		NA		NA	0.00381298	0.530751	1.32759e-26	6.58806e-24
cg12550731	C1orf21	1	184355219	N_Shore	TSS1500	RDMR	NA		NA	0.00387145	0.289011	1.33439e-26	6.61243e-24
cg09766856		11	95232457	OpenSea			TRUE		NA	0.00283676	0.56364	1.33891e-26	6.62541e-24
cg10983484	LYSMD2	15	52018762	OpenSea	Body		TRUE		TRUE	0.00324454	0.187483	1.35805e-26	6.71063e-24
cg18038269	TYK2	19	10464320	Island	Body		NA		NA	0.00436004	0.618611	1.3633e-26	6.72708e-24
cg10030162	ZNF423	16	49591203	OpenSea	Body		TRUE		NA	0.00346023	0.498898	1.37787e-26	6.78936e-24
cg08749443	PLIN1	15	90224098	OpenSea	TSS1500		TRUE		TRUE	-0.00568875	0.686526	1.38372e-26	6.80576e-24
cg04928129	UNKL	16	1429051	Island	5'UTR		NA	Promoter_Associated	NA	0.00270053	0.204949	1.38509e-26	6.80576e-24
cg22434594		17	47072339	N_Shore			NA	Unclassified_Cell_type_specific	NA	0.00678358	0.386714	1.40431e-26	6.89051e-24
cg10397819		14	75447512	Island			TRUE		TRUE	0.00185451	0.178813	1.42505e-26	6.98243e-24
cg05451498	KIAA0427	18	46386267	Island	3'UTR		NA		NA	0.00836334	0.435817	1.46333e-26	7.15997e-24
cg13554818	PHLDB3	19	43979316	N_Shore	3'UTR		TRUE	Promoter_Associated_Cell_type_specific	NA	0.00337689	0.163164	1.467e-26	7.1679e-24
cg24201173		15	96389108	OpenSea			TRUE		NA	0.00641499	0.646191	1.47267e-26	7.18556e-24
cg23118721		8	94133100	OpenSea			TRUE		NA	0.00267262	0.254803	1.47547e-26	7.18915e-24
cg27078140		2	175205821	Island			TRUE		NA	0.00287777	0.163236	1.48602e-26	7.23046e-24
cg26283564	SGCE	7	94284274	N_Shore	Body		NA		NA	0.00381354	0.154874	1.49085e-26	7.24389e-24
cg23539753	SP100	2	231280698	OpenSea	TSS200		NA	Promoter_Associated_Cell_type_specific	NA	-0.00599578	0.48972	1.52352e-26	7.39236e-24
cg11961495	ZMIZ1	10	80873797	OpenSea	5'UTR		TRUE		TRUE	0.00460155	0.527755	1.54428e-26	7.47743e-24
cg14517133	PRPH2	6	42664420	OpenSea	3'UTR		TRUE		NA	-0.00808311	0.602479	1.54534e-26	7.47743e-24
cg16021018	CCRL2	3	46449313	OpenSea	5'UTR		TRUE		NA	-0.00458696	0.660459	1.54748e-26	7.47743e-24
cg18614702		10	72215990	N_Shelf		RDMR	NA		NA	0.00325943	0.377141	1.55378e-26	7.49754e-24
cg03704673	GLTPD2	17	4692287	Island	5'UTR		NA		NA	0.00523362	0.295788	1.56629e-26	7.54745e-24
cg12331004		2	106227134	OpenSea			NA		NA	0.0047313	0.219185	1.5867e-26	7.63527e-24
cg22722777		4	87427887	OpenSea			TRUE		NA	0.00284042	0.249924	1.59225e-26	7.65145e-24
cg19163067	TFAP2E	1	36042438	Island	Body	RDMR	NA		NA	0.00642968	0.248686	1.61219e-26	7.72671e-24
cg04084348	PLAU	10	75677011	OpenSea	3'UTR		NA		NA	0.002669	0.306651	1.61233e-26	7.72671e-24
cg09477232		7	106061801	OpenSea			TRUE		NA	-0.00574063	0.31365	1.62392e-26	7.77158e-24
cg25320328	GFI1	1	92953037	S_Shore	TSS1500	RDMR	NA		NA	0.00471929	0.332327	1.62816e-26	7.78122e-24
cg25856632	DLG4	17	7111551	S_Shelf	Body		TRUE		NA	0.00314811	0.47491	1.63772e-26	7.81619e-24
cg12471171	WNT11	11	75898203	OpenSea	Body		NA		NA	-0.00308635	0.658961	1.653e-26	7.87836e-24
cg16674484	NDST1	5	149887497	OpenSea	TSS200		TRUE		NA	-0.00327992	0.839955	1.66219e-26	7.90649e-24
cg21115691	FCAMR	1	207140927	OpenSea	Body		NA		NA	-0.00306208	0.296478	1.66343e-26	7.90649e-24
cg10830496	FXYD7	19	35634556	Island	Body		NA		NA	0.00504626	0.204473	1.67162e-26	7.93462e-24
cg20300315		2	65051180	OpenSea			TRUE		NA	0.00284101	0.761975	1.68137e-26	7.97008e-24
cg06305026	TIAM2	6	155432132	OpenSea	5'UTR		TRUE		NA	0.00536096	0.718032	1.7287e-26	8.18336e-24
cg00012692	GJB6	13	20805487	N_Shore	5'UTR		TRUE		NA	0.00343993	0.160626	1.73433e-26	8.1989e-24
cg06263126		16	14393438	N_Shelf			NA		NA	0.00349954	0.676674	1.82308e-26	8.60677e-24
cg02975463		2	45178953	N_Shore		RDMR	NA	Unclassified	NA	0.00514885	0.258715	1.82778e-26	8.61734e-24
cg08888956	NTS	12	86267839	OpenSea	TSS1500		NA		NA	0.00250243	0.247212	1.83583e-26	8.64361e-24
cg00509772	E2F1	20	32273129	N_Shore	Body		NA	Promoter_Associated	NA	0.00243585	0.190586	1.85616e-26	8.72757e-24
cg14369455	ALPK1	4	113300768	Island	Body	RDMR	TRUE		NA	0.00256739	0.273671	1.87736e-26	8.81539e-24
cg00455327	CABLES1	18	20714217	N_Shore	TSS1500	RDMR	NA		NA	0.00453101	0.289401	1.88352e-26	8.83243e-24
cg03301165	C16orf62	16	19712046	OpenSea	3'UTR		NA		NA	-0.00696282	0.682876	1.92056e-26	8.99408e-24
cg03804255		12	90278335	OpenSea			TRUE		NA	0.00317616	0.225357	1.92514e-26	9.00346e-24
cg27157482	HOXA10	7	27215606	S_Shore	Body		NA	Unclassified_Cell_type_specific	NA	0.00339108	0.353826	1.9527e-26	9.12011e-24
cg14651518	SEMA3B	3	50313693	Island	Body		NA	Unclassified_Cell_type_specific	NA	0.00591711	0.19391	1.99483e-26	9.30444e-24
cg03467555		16	54404408	OpenSea			NA		NA	0.00385845	0.321124	2.00053e-26	9.31861e-24
cg23090529		1	51442133	N_Shore		RDMR	NA		NA	0.00906669	0.342902	2.0037e-26	9.32092e-24
cg11287987	SOST	17	41837048	S_Shelf	TSS1500		TRUE	Unclassified	NA	0.00225104	0.328567	2.02512e-26	9.40808e-24
cg15264020	PTPRG	3	61674210	OpenSea	Body		TRUE		NA	0.0040988	0.615799	2.05801e-26	9.54605e-24
cg15686157	KCNQ1	11	2753885	OpenSea	Body		NA		NA	0.00438378	0.728816	2.06029e-26	9.54605e-24
cg06615464		1	32080287	N_Shelf			NA		NA	0.00397638	0.791656	2.06404e-26	9.55074e-24
cg10308654	TBX2	17	59479306	Island	Body		NA		NA	0.00391937	0.211796	2.07921e-26	9.60784e-24
cg11423096	UIMC1	5	176423596	OpenSea	5'UTR		TRUE	Promoter_Associated_Cell_type_specific	NA	-0.00789252	0.578964	2.08188e-26	9.60784e-24
cg19092735	KRT80	12	52575862	OpenSea	Body		TRUE		TRUE	0.00377367	0.356769	2.09272e-26	9.64514e-24
cg20292791	DAB1	1	58089357	OpenSea	5'UTR	CDMR	TRUE		NA	0.00388777	0.220779	2.12432e-26	9.77788e-24
cg07430967	C17orf28	17	72954350	OpenSea	Body		NA	Unclassified	NA	0.0022527	0.196905	2.13281e-26	9.80407e-24
cg09890891		15	96904723	Island			NA		TRUE	0.00749475	0.516308	2.16829e-26	9.95405e-24
cg19892195	AGAP1	2	236963462	OpenSea	Body		NA		NA	0.00286731	0.376902	2.17161e-26	9.95623e-24
cg00825690	CACHD1	1	64960202	OpenSea	Body		TRUE		NA	0.00589234	0.448842	2.18078e-26	9.98513e-24
cg12167564		1	236047034	OpenSea			NA		NA	-0.00386191	0.49551	2.19698e-26	1.00461e-23
cg07584669		16	54546380	OpenSea			TRUE		NA	0.00449284	0.625346	2.20498e-26	1.00696e-23
cg16744911	SCD	10	102108974	S_Shore	Body		TRUE		NA	0.00690593	0.5645	2.23946e-26	1.02137e-23
cg13705830		9	89518557	OpenSea			TRUE		NA	0.00432752	0.440137	2.24903e-26	1.02439e-23
cg03880355	FAM169A	5	74162880	S_Shore	TSS1500	RDMR	NA		NA	0.00343639	0.193554	2.26326e-26	1.02953e-23
cg11959387	C3	19	6721027	OpenSea	TSS1500		NA		TRUE	-0.00440286	0.654339	2.27123e-26	1.03181e-23
cg02059867	RAPGEFL1	17	38334623	Island	1stExon		NA	Gene_Associated_Cell_type_specific	NA	0.00372693	0.339303	2.29454e-26	1.04105e-23
cg21990144	CLK1	2	201726666	N_Shelf	5'UTR	RDMR	NA		NA	-0.00457519	0.205889	2.31173e-26	1.04749e-23
cg23709902	SRCIN1	17	36719773	Island	Body		NA	Unclassified_Cell_type_specific	NA	0.00901364	0.406396	2.32058e-26	1.05014e-23
cg06060874	PRDM16	1	3269315	OpenSea	Body		TRUE		TRUE	0.00399305	0.410197	2.33294e-26	1.05436e-23
cg23957159	CASZ1	1	10843154	OpenSea	5'UTR		NA	Unclassified_Cell_type_specific	NA	0.00289912	0.408823	2.35024e-26	1.06081e-23
cg26537209		16	54324187	Island			NA		NA	0.00496943	0.158791	2.35551e-26	1.06182e-23
cg14538319	CHD2	15	93464153	OpenSea	Body		TRUE		NA	-0.00397058	0.602079	2.5141e-26	1.13185e-23
cg26923410	AQP1	7	30951432	OpenSea	TSS200		NA		NA	-0.00307785	0.13534	2.52601e-26	1.13575e-23
cg12034869	SLCO3A1	15	92555243	OpenSea	Body		TRUE	Unclassified_Cell_type_specific	NA	0.00312708	0.347281	2.56711e-26	1.15274e-23
cg23264016	C10orf11	10	77794696	OpenSea	Body		NA		NA	0.00358119	0.3656	2.60203e-26	1.16692e-23
cg04791718	TBC1D16	17	77923314	N_Shore	Body		TRUE		NA	0.00317532	0.493928	2.60871e-26	1.16842e-23
cg13308964		17	69029659	OpenSea			TRUE		NA	0.00338963	0.2142	2.62211e-26	1.17292e-23
cg12682931	RRAGD	6	90119710	N_Shore	Body	RDMR	NA		NA	0.00298553	0.884023	2.67158e-26	1.19352e-23
cg22277296		5	54180170	Island			NA	Unclassified_Cell_type_specific	NA	0.0029539	0.477005	2.69018e-26	1.20029e-23
cg19318330		21	44782872	S_Shore			NA	Unclassified	TRUE	0.00347843	0.722699	2.71959e-26	1.21187e-23
cg04917258	PC	11	66647170	OpenSea	5'UTR		TRUE		NA	0.00276712	0.669074	2.76365e-26	1.22993e-23
cg07301329	KIAA0182	16	85648263	Island	5'UTR		NA		NA	0.00440694	0.287368	2.81827e-26	1.25264e-23
cg11007962	AGAP1	2	236923454	OpenSea	Body		TRUE		NA	0.00594413	0.617069	2.82275e-26	1.25304e-23
cg08343644	GPR56	16	57662060	OpenSea	TSS1500		TRUE	Unclassified_Cell_type_specific	NA	0.00534249	0.317383	2.83827e-26	1.25833e-23
cg03285428	PPP4R2	3	73050093	S_Shelf	Body		NA		NA	-0.00372628	0.782281	2.86693e-26	1.26942e-23
cg21452219		2	28918652	OpenSea			TRUE		NA	0.0032032	0.73802	2.8815e-26	1.27426e-23
cg12038696	TFAP2E	1	36043352	Island	Body	RDMR	NA		TRUE	0.00504137	0.136543	2.93207e-26	1.29498e-23
cg15006681	H1F0	22	38199759	N_Shore	TSS1500	RDMR	TRUE		NA	0.00297646	0.1451	2.94328e-26	1.2983e-23
cg22162694	MIPEP	13	24323408	OpenSea	Body		TRUE		NA	0.00445682	0.409032	2.96844e-26	1.30774e-23
cg13564588	POU5F1	6	31136982	OpenSea	Body		NA	Unclassified_Cell_type_specific	NA	0.00495052	0.656776	2.98791e-26	1.31323e-23
cg17471102	FUT3	19	5851255	OpenSea	5'UTR		NA		NA	-0.00389259	0.200964	2.98841e-26	1.31323e-23
cg10236603		4	85246175	OpenSea			TRUE		NA	0.00322685	0.377246	3.0002e-26	1.31675e-23
cg27194211	SMTNL2	17	4503171	S_Shelf	Body		TRUE		NA	0.00235882	0.301528	3.03918e-26	1.33219e-23
cg02450064	DHX58	17	40260053	S_Shore	Body		TRUE	Unclassified	TRUE	0.00473382	0.263901	3.04958e-26	1.33507e-23
cg27565650		1	88151065	OpenSea			TRUE		NA	0.00373224	0.181966	3.10396e-26	1.35718e-23
cg03781224	MGLL	3	127481599	OpenSea	Body		TRUE	Unclassified_Cell_type_specific	NA	-0.00287713	0.601238	3.1271e-26	1.36559e-23
cg22654055	ABLIM2	4	8046793	OpenSea	Body		NA		NA	0.00281875	0.480626	3.14892e-26	1.37201e-23
cg16021217		3	25197710	OpenSea			TRUE		NA	0.00297326	0.440977	3.15062e-26	1.37201e-23
cg02520639	PAG1	8	82021210	N_Shelf	5'UTR		TRUE		NA	0.00388452	0.306071	3.1536e-26	1.37201e-23
cg04385523	C3orf23	3	44381576	S_Shore	5'UTR		NA		NA	-0.00316815	0.794058	3.15862e-26	1.37249e-23
cg26213821		11	68919873	OpenSea			TRUE		NA	0.0057388	0.627258	3.18514e-26	1.38229e-23
cg01612449	RBM4	11	66410467	N_Shore	Body	RDMR	NA		NA	-0.00374592	0.538843	3.20955e-26	1.39116e-23
cg16162590	ADRA1B	5	159360802	OpenSea	Body		TRUE		NA	0.00279937	0.37275	3.26621e-26	1.41396e-23
cg07471507		8	81086294	S_Shelf			NA		NA	-0.00562521	0.7534	3.28056e-26	1.41841e-23
cg18052274	LOC100126784	11	19737158	S_Shore	TSS1500	RDMR	TRUE		TRUE	0.00434595	0.470567	3.35104e-26	1.4471e-23
cg13375636	LRRC27	10	134190059	OpenSea	3'UTR		NA		NA	0.00575981	0.471731	3.3678e-26	1.45254e-23
cg27478224	IFIT2	10	91061115	OpenSea	TSS1500		NA	Promoter_Associated_Cell_type_specific	NA	-0.00535917	0.568391	3.37752e-26	1.45494e-23
cg09967440	C10orf137	10	127444969	OpenSea	Body		NA		NA	-0.00404379	0.561658	3.38301e-26	1.45551e-23
cg05994244		15	96904960	Island			TRUE		TRUE	0.00550453	0.388069	3.39386e-26	1.45838e-23
cg23014759	BCL9	1	147059047	OpenSea	5'UTR		TRUE		NA	0.00335015	0.116353	3.42581e-26	1.4703e-23
cg02082887	TCAP	17	37820361	N_Shelf	TSS1500		TRUE		NA	0.00248883	0.436518	3.51378e-26	1.50621e-23
cg00475509	ZIC1	3	147125955	N_Shore	TSS1500	RDMR	NA		NA	0.00250968	0.137542	3.51868e-26	1.50646e-23
cg10445599	LOH12CR1	12	12558857	OpenSea	Body		TRUE		NA	-0.00659617	0.504743	3.59161e-26	1.5343e-23
cg08759150	ZFAND3	6	38105675	OpenSea	Body		TRUE		NA	0.00490074	0.759224	3.5925e-26	1.5343e-23
cg10367409		2	8711177	OpenSea			NA		NA	0.00476598	0.578235	3.69678e-26	1.57691e-23
cg25344401	FOXK1	7	4755415	N_Shelf	Body		TRUE		TRUE	-0.00625834	0.729107	3.79558e-26	1.61708e-23
cg04740205	PCF11	11	82871065	S_Shelf	Body	RDMR	NA		NA	-0.0050141	0.635469	3.87283e-26	1.64798e-23
cg22000727		6	3459199	S_Shore		RDMR	NA		NA	0.00368803	0.235426	3.90535e-26	1.6598e-23
cg11575644	TYK2	19	10464711	Island	Body		NA	Gene_Associated_Cell_type_specific	TRUE	0.00570824	0.746605	3.91895e-26	1.66355e-23
cg01362541	BMP7	20	55838142	N_Shore	Body	RDMR	NA		NA	0.00654621	0.679547	3.97363e-26	1.68472e-23
cg01980495	SMARCA2	9	2047595	Island	Body		NA		NA	0.00348204	0.488209	3.98925e-26	1.68683e-23
cg13053653	HOXD3	2	177037631	N_Shore	3'UTR	RDMR	NA		NA	0.0050131	0.252114	3.99166e-26	1.68683e-23
cg21497480	LOC286135	8	29783819	OpenSea	Body		TRUE		NA	0.00371571	0.233303	3.99309e-26	1.68683e-23
cg04915618	KALRN	3	124304960	S_Shore	Body		TRUE		NA	0.00757435	0.550472	4.13344e-26	1.74401e-23
cg08496523	C11orf9	11	61541027	N_Shelf	Body		NA		NA	0.0031071	0.485348	4.17651e-26	1.76005e-23
cg22670675	TMEM51	1	15533433	OpenSea	5'UTR		TRUE		NA	0.00236921	0.203506	4.25976e-26	1.79297e-23
cg26380291	TCF7L2	10	114787843	OpenSea	Body		TRUE		NA	0.00227737	0.160336	4.3006e-26	1.80799e-23
cg09634707		10	72219713	S_Shore			NA		NA	0.00449021	0.450221	4.31067e-26	1.80962e-23
cg09187107	FLJ90757	17	79006087	N_Shore	Body		NA		NA	-0.00409033	0.78499	4.31486e-26	1.80962e-23
cg11010575	JMJD7-PLA2G4B	15	42129464	OpenSea	Body		NA		NA	-0.00464312	0.817754	4.37633e-26	1.8332e-23
cg16958106	NRXN2	11	64424455	N_Shelf	Body		NA	Unclassified_Cell_type_specific	NA	0.00322929	0.445998	4.44271e-26	1.85878e-23
cg10470208	ZNF598	16	2058701	N_Shore	Body	RDMR	NA		NA	-0.00442282	0.164088	4.4892e-26	1.87598e-23
cg18411108	ATXN7	3	63955727	OpenSea	Body		TRUE		NA	0.00623546	0.56387	4.56706e-26	1.90477e-23
cg10608341	HESX1	3	57234000	OpenSea	1stExon		NA		NA	0.00347187	0.238927	4.56899e-26	1.90477e-23
cg23008871		17	45949743	Island			NA		NA	0.00368749	0.168528	4.58763e-26	1.91026e-23
cg14101485	NFIC	19	3369759	Island	Body		NA		NA	0.00523328	0.201213	4.65496e-26	1.93599e-23
cg15282417	FAM125B	9	129245246	Island	Body		TRUE		NA	0.00434791	0.730613	4.66286e-26	1.93614e-23
cg10356187		12	66122804	Island		CDMR	TRUE		NA	0.00142429	0.0642033	4.6708e-26	1.93614e-23
cg08017323	TSPAN9	12	3240167	OpenSea	5'UTR		NA		NA	0.00351681	0.472126	4.67194e-26	1.93614e-23
cg16498391	SLMO1	18	12421072	S_Shore	Body		NA	Unclassified	NA	0.00353806	0.227596	4.7269e-26	1.95659e-23
cg01515508	CASZ1	1	10728270	S_Shelf	Body		NA		NA	0.00582736	0.381032	4.78294e-26	1.97558e-23
cg00297966	NSMCE2	8	126186709	OpenSea	Body		TRUE		NA	-0.00757677	0.461301	4.78409e-26	1.97558e-23
cg18330688	TNIP3	4	122059692	OpenSea	Body		TRUE		NA	0.00502895	0.696391	4.79144e-26	1.97604e-23
cg18537205	VTI1A	10	114575091	OpenSea	Body		NA		NA	0.0034436	0.672679	4.79733e-26	1.97604e-23
cg10611580	2020-09-09	17	75319942	OpenSea	5'UTR		NA	Gene_Associated_Cell_type_specific	NA	-0.00275063	0.461809	4.80215e-26	1.97604e-23
cg12228061		12	116382677	OpenSea			NA		NA	-0.00521521	0.754124	4.87025e-26	2.0017e-23
cg14409083	EMP1	12	13349724	OpenSea	5'UTR		NA	Unclassified_Cell_type_specific	TRUE	-0.00487889	0.442126	4.91554e-26	2.01794e-23
cg25930644	MYH10	17	8531915	N_Shore	5'UTR		NA	Unclassified_Cell_type_specific	NA	0.00242179	0.319304	4.94252e-26	2.02664e-23
cg04801085	RCOR1	14	103150012	OpenSea	Body		NA		NA	0.00355256	0.752786	4.9529e-26	2.0275e-23
cg26511108	COMMD3	10	22608951	S_Shelf	3'UTR	RDMR	NA		NA	0.00874912	0.497045	4.95623e-26	2.0275e-23
cg19324118	ATXN7L1	7	105279494	OpenSea	Body		NA		NA	0.00345947	0.460316	4.99977e-26	2.04292e-23
cg12684999		2	161099777	OpenSea			TRUE		NA	0.00312851	0.201356	5.01612e-26	2.04691e-23
cg19853703	APOL6	22	36044792	OpenSea	5'UTR		TRUE	Promoter_Associated	TRUE	-0.00293003	0.305358	5.02125e-26	2.04691e-23
cg20813374	FKBP5	6	35657180	S_Shore	5'UTR		NA	Promoter_Associated	NA	0.00318515	0.465583	5.0685e-26	2.06376e-23
cg09510752		5	134526173	N_Shore		CDMR	NA		NA	0.00528288	0.551433	5.22508e-26	2.1234e-23
cg10091265	SGPP2	2	223288331	N_Shore	TSS1500	RDMR	NA	Unclassified_Cell_type_specific	NA	0.00568732	0.493294	5.22712e-26	2.1234e-23
cg11486078		8	103981066	OpenSea			TRUE		NA	0.0041266	0.428381	5.31737e-26	2.15755e-23
cg14906690		10	76573506	Island			TRUE		NA	0.00294245	0.196308	5.33733e-26	2.16314e-23
cg24124703	MEF2C	5	88122944	OpenSea	5'UTR		TRUE	Unclassified_Cell_type_specific	NA	0.00481125	0.264155	5.39774e-26	2.18508e-23
cg18045685		7	22629474	OpenSea			TRUE		NA	-0.005523	0.276783	5.45751e-26	2.20672e-23
cg11459773	BCL3	19	45262055	S_Shore	Body	RDMR	NA		TRUE	0.00524396	0.383502	5.51186e-26	2.22612e-23
cg11152943	TRAPPC9	8	141248988	OpenSea	Body		TRUE		NA	0.00270365	0.403953	5.58384e-26	2.25259e-23
cg04187403	NRN1	6	5999377	Island	Body		NA		TRUE	0.00238872	0.127879	5.61013e-26	2.26059e-23
cg02250764		5	134878149	N_Shore			NA		NA	0.00454722	0.326751	5.62841e-26	2.26534e-23
cg20945738	TNFSF13B	13	108922032	OpenSea	5'UTR		TRUE	Promoter_Associated_Cell_type_specific	NA	-0.00589117	0.24977	5.6382e-26	2.26667e-23
cg11591485	SLC12A8	3	124839640	OpenSea	Body		TRUE	Unclassified_Cell_type_specific	NA	0.00378807	0.146301	5.73643e-26	2.30351e-23
cg12283119		2	15805012	OpenSea			NA		NA	0.00312137	0.514074	5.7561e-26	2.30875e-23
cg18814344	CXXC5	5	139040546	N_Shore	5'UTR		TRUE	Unclassified_Cell_type_specific	TRUE	0.00262064	0.3642	5.80253e-26	2.32471e-23
cg16337566	PINX1	8	10657514	OpenSea	Body		TRUE		TRUE	0.00337769	0.493795	5.80965e-26	2.32489e-23
cg08928696		1	225632889	OpenSea			NA	Promoter_Associated	TRUE	-0.00423831	0.55143	6.03543e-26	2.41248e-23
cg13826564	LTBP3	11	65306731	Island	Body		NA	Unclassified_Cell_type_specific	NA	0.0099499	0.467912	6.06751e-26	2.42253e-23
cg10665488	SLC25A22	11	796569	N_Shore	TSS1500	RDMR	TRUE	Promoter_Associated	NA	-0.00349258	0.349944	6.10561e-26	2.43496e-23
cg15188398	MACROD1	11	63912722	OpenSea	Body		NA	Unclassified	NA	0.00605939	0.748643	6.14259e-26	2.44691e-23
cg09367467	MAD1L1	7	1894209	N_Shore	Body		NA		NA	0.00328932	0.550561	6.20908e-26	2.47058e-23
cg08877322		3	156825813	OpenSea			TRUE		NA	0.00358987	0.357251	6.29169e-26	2.50061e-23
cg01557754	FGF11	17	7342661	N_Shore	TSS200	RDMR	NA		NA	0.00407787	0.267381	6.32744e-26	2.51196e-23
cg27652490	KLHL26	19	18761402	Island	Body	RDMR	TRUE		TRUE	0.00251687	0.436109	6.34955e-26	2.51787e-23
cg09685250	ATP4B	13	114305121	S_Shelf	Body		NA		NA	-0.00298444	0.593528	6.4264e-26	2.54546e-23
cg25558761	GPR132	14	105522902	OpenSea	5'UTR		TRUE		NA	0.00600848	0.499614	6.44919e-26	2.55159e-23
cg05898452	EGFR	7	55224863	OpenSea	Body		TRUE		NA	0.00332627	0.222994	6.50148e-26	2.56937e-23
cg06712541		22	39321611	N_Shore			NA		NA	-0.00439602	0.69993	6.53636e-26	2.58024e-23
cg14631541	SDCCAG3	9	139306089	S_Shore	TSS1500		NA	NonGene_Associated	NA	-0.00385739	0.609032	6.55885e-26	2.58619e-23
cg09709565	CREB3L1	11	46316283	N_Shore	Body		NA	Unclassified_Cell_type_specific	NA	0.00462946	0.495983	6.5969e-26	2.5967e-23
cg12869240	DHX32	10	127569973	OpenSea	TSS200		NA		NA	0.00355876	0.198413	6.60037e-26	2.5967e-23
cg24004943	DHX32	10	127569905	OpenSea	TSS200		NA		NA	0.00321473	0.381391	6.60834e-26	2.59692e-23
cg02397720		2	238512407	OpenSea			NA	Unclassified_Cell_type_specific	NA	0.00260005	0.286534	6.74633e-26	2.64816e-23
cg04886157	TBC1D10B	16	30380006	N_Shore	Body	RDMR	NA		NA	-0.00286336	0.217811	6.85444e-26	2.68758e-23
cg22727572	LOC100132215	2	63272334	Island	Body		TRUE		NA	0.0112714	0.700226	6.87248e-26	2.69163e-23
cg10115320	PRDM16	1	3115545	S_Shelf	Body		NA		NA	0.00418332	0.474051	6.89143e-26	2.69603e-23
cg02553054	SMARCD1	12	50478480	N_Shore	TSS1500		NA	Promoter_Associated	NA	-0.003432	0.488026	6.98857e-26	2.73097e-23
cg15557878	TSLP	5	110406049	N_Shelf	TSS1500		NA		NA	0.00391784	0.129674	7.00357e-26	2.73378e-23
cg05395156	CAMK2G	10	75631701	N_Shore	Body	RDMR	NA		NA	-0.00338225	0.550941	7.13204e-26	2.78082e-23
cg25123521	MYOZ3	5	150040884	OpenSea	1stExon		NA		NA	0.00199049	0.440957	7.16933e-26	2.79224e-23
cg10040131	SFXN5	2	73178866	OpenSea	Body		TRUE		NA	0.00235377	0.316295	7.18377e-26	2.79475e-23
cg22460896		15	96888024	Island		RDMR	TRUE	Unclassified	NA	0.00350859	0.523895	7.20968e-26	2.80029e-23
cg03926852	LY6G6E	6	31681562	OpenSea	Body		NA		NA	0.002404	0.670823	7.21404e-26	2.80029e-23
cg11069430	USP44	12	95945082	S_Shelf	1stExon		NA		NA	0.00470522	0.309534	7.28931e-26	2.82637e-23
cg24406771		1	229002047	OpenSea			TRUE		NA	0.00392794	0.585365	7.43366e-26	2.87914e-23
cg20309353	ALKBH5	17	18089940	S_Shore	Body	RDMR	NA		NA	-0.00372027	0.416352	7.46237e-26	2.88706e-23
cg17427305		15	57881059	N_Shelf			NA		NA	-0.00417099	0.744391	7.54244e-26	2.91481e-23
cg05679686	CORO1C	12	109064006	OpenSea	Body		TRUE		NA	0.00270536	0.806462	7.63713e-26	2.94814e-23
cg07411420	ERC2	3	56492969	OpenSea	5'UTR		TRUE		NA	0.0046041	0.280484	7.81328e-26	3.01281e-23
cg26853855	CSRNP3	2	166428866	OpenSea	TSS200		NA		NA	0.00497932	0.284029	7.83846e-26	3.01919e-23
cg07616374		2	45159663	N_Shore		RDMR	NA	Unclassified_Cell_type_specific	NA	0.00434225	0.281917	7.86749e-26	3.02703e-23
cg14729148	CUGBP2	10	11208339	S_Shore	Body	CDMR	NA	Promoter_Associated	TRUE	0.00480041	0.544257	7.9188e-26	3.04342e-23
cg20522398		7	17316151	OpenSea			TRUE		TRUE	-0.00656458	0.587331	7.95384e-26	3.05353e-23
cg27129048	ST8SIA2	15	92938576	S_Shore	Body	CDMR	NA		TRUE	0.0047161	0.439695	7.98366e-26	3.06161e-23
cg01356198	LPP	3	187929513	OpenSea	TSS1500		TRUE		NA	-0.0043711	0.732079	8.08959e-26	3.09884e-23
cg06912792	CDC42	1	22416735	OpenSea	Body		TRUE		NA	-0.00317419	0.29613	8.12407e-26	3.10863e-23
cg12630983	FBN2	5	127872200	Island	Body	CDMR	NA	Unclassified_Cell_type_specific	NA	0.00501617	0.345023	8.2303e-26	3.14584e-23
cg18239942	PACS2	14	105793879	N_Shelf	Body		NA		TRUE	0.00328486	0.472149	8.25129e-26	3.15041e-23
cg24674640		7	104628750	S_Shelf			TRUE		NA	-0.00901965	0.482583	8.26753e-26	3.15317e-23
cg27446570	C1orf174	1	3809532	S_Shore	Body		NA		NA	-0.00408853	0.780964	8.42775e-26	3.21077e-23
cg00329157	GCET2	3	111844870	OpenSea	5'UTR		TRUE		NA	0.00377259	0.589509	8.48958e-26	3.2308e-23
cg17970107		1	25831485	OpenSea			TRUE		NA	-0.00229615	0.91015	8.67818e-26	3.29898e-23
cg17356036	HDAC4	2	240213057	OpenSea	Body		TRUE		TRUE	0.00260932	0.275481	8.69698e-26	3.30253e-23
cg07114422	SKI	1	2183438	OpenSea	Body		NA		NA	-0.00428642	0.637035	8.73437e-26	3.31313e-23
cg02880169	VPS13B	8	100885941	OpenSea	Body		TRUE		NA	-0.0047328	0.782587	8.77051e-26	3.32323e-23
cg01710147	PFKFB2	1	207233419	OpenSea	Body		TRUE		NA	-0.00323282	0.670784	8.8072e-26	3.33021e-23
cg04110224	SHANK2	11	70508463	Island	Body		TRUE		TRUE	0.0052416	0.189824	8.80799e-26	3.33021e-23
cg25605307	GLT25D2	1	183965312	OpenSea	Body		TRUE		NA	0.00455346	0.599621	8.85834e-26	3.34563e-23
cg13647382	COL12A1	6	75912547	S_Shore	5'UTR	RDMR	NA		NA	0.00252538	0.475127	8.89418e-26	3.35554e-23
cg12395259	LOC100132215	2	63271927	N_Shore	Body	RDMR	TRUE		NA	0.00873093	0.750954	8.94152e-26	3.36976e-23
cg23197862		8	135732917	OpenSea			TRUE	Unclassified	TRUE	-0.0048447	0.210498	9.32739e-26	3.51139e-23
cg16606347	EBF3	10	131749788	OpenSea	Body		NA		NA	0.00391618	0.762224	9.40648e-26	3.53735e-23
cg19441834		10	103519543	OpenSea			TRUE		NA	0.00351781	0.447519	9.58443e-26	3.6004e-23
cg09332175		1	938905	S_Shore			NA		NA	0.00339637	0.708276	9.61139e-26	3.60665e-23
cg07686528	JMJD1C	10	65198176	OpenSea	Body		TRUE		NA	0.00318244	0.79901	9.65437e-26	3.61889e-23
cg06204101	PRKCZ	1	2039671	N_Shore	5'UTR		NA	Unclassified	NA	-0.00421674	0.71064	9.6852e-26	3.62655e-23
cg10339295		14	101942203	OpenSea			TRUE		TRUE	-0.00528858	0.457471	9.85937e-26	3.6841e-23
cg18437144	CASZ1	1	10788928	OpenSea	5'UTR		NA		NA	0.00392192	0.333261	9.85997e-26	3.6841e-23
cg26711406		16	85616330	OpenSea			TRUE		NA	0.00230002	0.458514	9.94992e-26	3.71373e-23
cg04649530		9	132113372	N_Shore			NA		NA	0.00356401	0.308225	1.0249e-25	3.82129e-23
cg25710298	FAM150B	2	286830	N_Shore	Body	RDMR	TRUE	Unclassified_Cell_type_specific	NA	0.00388142	0.289665	1.04828e-25	3.90428e-23
cg17257587	MACROD1	11	63912583	OpenSea	Body		NA		NA	0.00546181	0.653871	1.05683e-25	3.93192e-23
cg24953321	TRIM71	3	32860553	N_Shore	Body	RDMR	NA		NA	0.00339515	0.268127	1.06653e-25	3.96382e-23
cg02696675	RBMS1	2	161265366	S_Shore	Body	RDMR	NA		NA	0.00451405	0.609448	1.07045e-25	3.97416e-23
cg13899132		7	124289177	OpenSea			TRUE		NA	0.00280088	0.551492	1.07506e-25	3.98294e-23
cg09062708	NFIA	1	61649907	OpenSea	Body		TRUE		TRUE	-0.00690321	0.19463	1.0751e-25	3.98294e-23
cg02335533	PTHLH	12	28124870	S_Shore	1stExon	RDMR	NA		NA	0.00516432	0.388412	1.10717e-25	4.0974e-23
cg01478155	CENPB	20	3764694	N_Shore	1stExon		NA		NA	-0.0046757	0.664293	1.1092e-25	4.10057e-23
cg26365147		1	48038677	OpenSea			TRUE		NA	0.00344693	0.720846	1.1198e-25	4.1354e-23
cg09813986	ZFR	5	32445429	S_Shore	TSS1500		NA	Unclassified	NA	0.00367874	0.530282	1.1288e-25	4.16424e-23
cg04329382	LOC400931	22	46480891	N_Shore	TSS1500		NA	Gene_Associated_Cell_type_specific	TRUE	-0.0036681	0.767009	1.13098e-25	4.16787e-23
cg02043791	FGFR1	8	38322629	N_Shore	5'UTR		NA		NA	0.00292639	0.357545	1.13814e-25	4.18983e-23
cg04277574	NAV1	1	201700486	OpenSea	Body		TRUE		NA	0.00465391	0.593913	1.15284e-25	4.23946e-23
cg24823222		10	30247300	OpenSea			TRUE		NA	-0.00516662	0.762955	1.15471e-25	4.24188e-23
cg17819085		1	235122803	OpenSea			TRUE		NA	0.00290129	0.291159	1.16065e-25	4.25923e-23
cg22113926		17	28566331	S_Shelf		RDMR	NA		NA	0.00257183	0.328299	1.16506e-25	4.27094e-23
cg26210267	ATP5I	4	668877	S_Shore	TSS1500		NA		NA	-0.00344464	0.359227	1.16862e-25	4.2795e-23
cg02820901	ATP11A	13	113351484	Island	Body		NA		NA	-0.00714397	0.765568	1.18234e-25	4.31967e-23
cg00220294		16	54322494	Island		RDMR	NA		NA	0.00364959	0.292191	1.18286e-25	4.31967e-23
cg20818457	TRIM2	4	154179401	OpenSea	Body		TRUE		NA	0.00512314	0.407073	1.1833e-25	4.31967e-23
cg18785787	PBX1	1	164750253	OpenSea	Body		TRUE		TRUE	0.00421067	0.590363	1.18909e-25	4.33629e-23
cg13441891	KIAA0182	16	85648370	Island	5'UTR		NA		NA	0.00354663	0.501892	1.21052e-25	4.40982e-23
cg14479837	TMEM132C	12	129128018	OpenSea	Body		NA		NA	-0.0050778	0.589691	1.22071e-25	4.44231e-23
cg02566627	CTDSP2	12	58232984	OpenSea	Body		TRUE		NA	-0.00322664	0.37369	1.24404e-25	4.52251e-23
cg10870160	RAI1	17	17695459	N_Shelf	5'UTR		TRUE		NA	0.0020914	0.359872	1.24643e-25	4.52645e-23
cg18183163	SP5	2	171574141	S_Shore	3'UTR		NA	Unclassified_Cell_type_specific	NA	0.00592344	0.175538	1.25912e-25	4.56466e-23
cg25837277	PNMAL2	19	46999366	S_Shore	TSS200		NA		NA	0.00288637	0.366912	1.25956e-25	4.56466e-23
cg13975362	GPR116	6	46890512	OpenSea	TSS1500		NA		NA	-0.0035505	0.859118	1.28249e-25	4.64293e-23
cg13435432	NR2E1	6	108489292	Island	Body	RDMR	NA		NA	0.00354164	0.477515	1.29528e-25	4.68439e-23
cg24518098		1	2146288	S_Shore			NA	Unclassified_Cell_type_specific	NA	-0.00421031	0.281392	1.32407e-25	4.78357e-23
cg21889703	BCLAF1	6	136607649	N_Shelf	5'UTR		NA		NA	-0.00514838	0.643755	1.33091e-25	4.80329e-23
cg05106191	PAX8	2	114036685	S_Shore	TSS200		NA		NA	0.00411711	0.414556	1.34346e-25	4.84361e-23
cg17782974	TRIM8	10	104406990	S_Shelf	Body	RDMR	NA		NA	-0.00498546	0.738517	1.36351e-25	4.91082e-23
cg05149386	ADM	11	10325809	N_Shore	TSS1500		NA		NA	0.00458609	0.207054	1.3681e-25	4.92227e-23
cg23870587	TTC7B	14	91060122	OpenSea	Body		TRUE		NA	0.00316082	0.263143	1.37248e-25	4.93295e-23
cg17180088	WSCD2	12	108629501	OpenSea	Body		TRUE		NA	0.0029192	0.223271	1.37439e-25	4.93473e-23
cg01790438		5	10332117	N_Shore			NA		NA	-0.00431583	0.536002	1.38261e-25	4.95914e-23
cg14174719	SESN2	1	28599974	OpenSea	Body		TRUE		NA	0.00315784	0.662812	1.40003e-25	5.0165e-23
cg02200717	RNASE7	14	21511676	OpenSea	3'UTR		NA		NA	-0.00384731	0.583446	1.41726e-25	5.07301e-23
cg23719157	STRA6	15	74501584	OpenSea	TSS1500		TRUE		TRUE	0.00447368	0.247187	1.42211e-25	5.08517e-23
cg13975106		13	106939472	OpenSea			TRUE		NA	0.00422433	0.443798	1.43367e-25	5.12127e-23
cg25403283		10	63629487	OpenSea		RDMR	NA		NA	-0.00439616	0.65707	1.45905e-25	5.20661e-23
cg11500788	FZD3	8	28355368	S_Shelf	5'UTR		NA		NA	0.00461786	0.555789	1.48655e-25	5.29932e-23
cg00175573	RALGAPA2	20	20433203	Island	Body		TRUE	Promoter_Associated	TRUE	0.00304352	0.187736	1.49072e-25	5.30647e-23
cg19513727		12	110708125	OpenSea			TRUE		TRUE	0.0027339	0.401212	1.49159e-25	5.30647e-23
cg20928770		11	126055124	OpenSea			NA		NA	0.00487001	0.722489	1.49344e-25	5.30765e-23
cg13407169	LOC151534	2	74731413	S_Shore	Body		NA		NA	0.00333627	0.448704	1.50941e-25	5.35895e-23
cg17150663	KCP	7	128551672	S_Shore	TSS1500		NA		NA	0.0029962	0.339384	1.51128e-25	5.36012e-23
cg00657287	ZNF366	5	71755571	N_Shore	Body		NA		NA	-0.00473451	0.817899	1.51476e-25	5.36704e-23
cg09143801	SEMA6C	1	151105049	Island	Body		NA	Unclassified_Cell_type_specific	TRUE	0.00564759	0.25596	1.51756e-25	5.37097e-23
cg07336350		16	54322127	Island			NA		NA	0.00529635	0.37091	1.51895e-25	5.37097e-23
cg00195796	SOX2OT	3	181444131	N_Shore	Body	CDMR	NA		NA	0.00363499	0.218384	1.54953e-25	5.47357e-23
cg18887458		7	115995934	OpenSea			TRUE		NA	-0.00424751	0.669651	1.56229e-25	5.51305e-23
cg14422085		6	26225989	S_Shore		RDMR	NA	Promoter_Associated	NA	0.00648778	0.306308	1.56932e-25	5.53229e-23
cg00892255	NIN	14	51243177	OpenSea	Body		TRUE		NA	-0.00395538	0.851491	1.5803e-25	5.56539e-23
cg09147140	KBTBD11	8	1924394	S_Shore	5'UTR		NA		TRUE	0.00511346	0.535408	1.58589e-25	5.57945e-23
cg03625952	FABP6	5	159625457	OpenSea	5'UTR		TRUE	Unclassified	NA	0.00234956	0.369006	1.60892e-25	5.65476e-23
cg08968329	FAM38A	16	88844499	N_Shore	Body		TRUE	Unclassified_Cell_type_specific	NA	0.00254145	0.409702	1.61126e-25	5.65731e-23
cg01126162	C10orf18	10	5734985	OpenSea	5'UTR	CDMR	TRUE	Promoter_Associated	NA	0.00184455	0.207268	1.6186e-25	5.67738e-23
cg07482916	KDM6B	17	7757646	Island	3'UTR		NA		NA	0.00341252	0.278724	1.62854e-25	5.70651e-23
cg09086037	TRIO	5	14488255	Island	Body		TRUE	Unclassified_Cell_type_specific	TRUE	0.0058827	0.57356	1.65735e-25	5.80162e-23
cg02495569	NEURL1B	5	172110211	N_Shore	Body		NA	Unclassified_Cell_type_specific	NA	0.0043276	0.707861	1.66896e-25	5.83644e-23
cg04136113	RPTOR	17	78668022	OpenSea	Body		NA		NA	0.00204652	0.434982	1.67786e-25	5.86169e-23
cg07822618	WDR60	7	158653701	N_Shelf	Body		NA		NA	0.00451983	0.468574	1.69461e-25	5.91429e-23
cg12750917	NEK7	1	198204074	OpenSea	Body		TRUE		NA	0.00222372	0.257603	1.72652e-25	6.01964e-23
cg23280999		8	37378276	OpenSea			NA		NA	0.00353332	0.237862	1.73804e-25	6.05375e-23
cg03989617	GPR56	16	57662541	OpenSea	5'UTR		TRUE	Unclassified_Cell_type_specific	NA	0.00376583	0.179124	1.74097e-25	6.05793e-23
cg06564500	TXNRD2	22	19892663	N_Shore	Body		TRUE		NA	0.00358228	0.311522	1.76877e-25	6.14854e-23
cg09137533		22	46469091	S_Shore		RDMR	NA		NA	-0.00831034	0.263972	1.78586e-25	6.20176e-23
cg25021575	KCTD12	13	77461919	S_Shore	TSS1500	RDMR	NA		NA	0.00446849	0.479143	1.79934e-25	6.2424e-23
cg05805445	SPATA5	4	124225943	OpenSea	Body		TRUE		NA	0.00297978	0.397941	1.80964e-25	6.2719e-23
cg08924321		11	35663067	OpenSea			TRUE		NA	0.00262357	0.501698	1.86922e-25	6.46758e-23
cg14601868	HOXD8	2	176993320	N_Shore	TSS1500		TRUE		TRUE	0.00261666	0.16738	1.87118e-25	6.46758e-23
cg16085531		16	54322938	Island		RDMR	NA		NA	0.00372612	0.339915	1.87166e-25	6.46758e-23
cg08951638		5	141706213	S_Shore			TRUE	Unclassified_Cell_type_specific	NA	0.00330222	0.344289	1.88164e-25	6.49564e-23
cg06750897	PBX1	1	164545553	Island	Body	RDMR	NA		NA	0.00554566	0.242756	1.93304e-25	6.66649e-23
cg00834536	ADCY9	16	4013537	N_Shore	3'UTR		TRUE	Unclassified_Cell_type_specific	NA	0.00297899	0.20628	1.99136e-25	6.86087e-23
cg00700239	SRRM4	12	119595495	S_Shelf	3'UTR		NA		NA	-0.0036905	0.743317	2.01598e-25	6.93886e-23
cg16986578	ELF3	1	201979567	OpenSea	TSS200		TRUE	Unclassified	TRUE	0.00291599	0.332221	2.05066e-25	7.0493e-23
cg13736128	ZSWIM7	17	15901788	N_Shore	Body		NA	Promoter_Associated	TRUE	-0.00822565	0.620613	2.05211e-25	7.0493e-23
cg10415570	ZFHX3	16	73053779	OpenSea	5'UTR		TRUE		TRUE	0.0037391	0.508778	2.06219e-25	7.07697e-23
cg02981163		16	49873368	S_Shore			NA		NA	0.00262895	0.425111	2.07597e-25	7.11728e-23
cg11139044	ZIC4	3	147107109	N_Shore	Body	RDMR	NA		NA	0.00243716	0.172654	2.11996e-25	7.26097e-23
cg08344524		15	56091621	OpenSea			TRUE	Unclassified	NA	0.00192602	0.128332	2.12772e-25	7.28041e-23
cg09174411	BTBD11	12	107792027	OpenSea	Body		TRUE		NA	0.0038017	0.442227	2.13821e-25	7.30556e-23
cg06067425		4	141418804	N_Shore			TRUE		NA	0.0027422	0.378052	2.13925e-25	7.30556e-23
cg06512249	GABBR1	6	29599390	N_Shore	Body	RDMR	NA		TRUE	0.00426071	0.18488	2.15882e-25	7.36177e-23
cg24685109	TMEM62	15	43477090	N_Shore	3'UTR		NA	Promoter_Associated	NA	0.00330373	0.638514	2.15993e-25	7.36177e-23
cg06737981	BCR	22	23523942	Island	1stExon		NA		NA	0.00371126	0.457959	2.16285e-25	7.36456e-23
cg01477835	AFF1	4	87989696	OpenSea	Body		TRUE		NA	-0.00639031	0.383666	2.18528e-25	7.43366e-23
cg02478731		17	41632391	OpenSea			TRUE		NA	0.00462706	0.593035	2.19344e-25	7.45417e-23
cg22892904	CBX2	17	77751089	N_Shore	TSS1500	RDMR	NA	Unclassified	NA	0.00294134	0.271645	2.20164e-25	7.47477e-23
cg15442678	ROBO1	3	79065762	N_Shelf	Body		NA		NA	0.00474196	0.27067	2.27357e-25	7.71147e-23
cg19331777	KIAA1462	10	30344362	N_Shelf	5'UTR		NA		NA	0.00651126	0.394192	2.28585e-25	7.74561e-23
cg00831247	LOXL3	2	74780268	N_Shore	5'UTR	CDMR	NA	Unclassified	NA	0.00339798	0.45772	2.29686e-25	7.77539e-23
cg19267205	PIK3CD	1	9781963	OpenSea	Body		NA	Gene_Associated	TRUE	0.00233703	0.173616	2.32469e-25	7.86198e-23
cg04505252		6	15244745	N_Shore		RDMR	NA		NA	0.00360225	0.280621	2.37044e-25	8.00895e-23
cg10999410	TRIO	5	14487610	N_Shore	Body		TRUE	Unclassified_Cell_type_specific	NA	0.0033748	0.601673	2.39964e-25	8.09978e-23
cg08132573		1	235159410	OpenSea			TRUE	Unclassified_Cell_type_specific	NA	0.00341657	0.638639	2.42069e-25	8.16294e-23
cg09858224	ZFHX3	16	72981996	OpenSea	Body		NA		NA	0.0034511	0.529743	2.44279e-25	8.22953e-23
cg17229173		5	67483875	OpenSea		RDMR	NA		NA	0.00376378	0.405241	2.46502e-25	8.29641e-23
cg03752628	PTGFRN	1	117453510	S_Shore	Body		NA	Unclassified_Cell_type_specific	NA	0.00126406	0.0834544	2.48258e-25	8.34746e-23
cg06881093	PAX8	2	114035983	Island	5'UTR		NA	Unclassified_Cell_type_specific	TRUE	0.00704227	0.296623	2.48517e-25	8.34816e-23
cg08711188	ATP11A	13	113386485	S_Shelf	Body		TRUE		NA	-0.00370398	0.87247	2.50616e-25	8.41057e-23
cg09938664		11	119662882	OpenSea			TRUE		NA	0.00261078	0.274169	2.51033e-25	8.41648e-23
cg24793022		6	160296499	OpenSea			TRUE		NA	0.00466862	0.782804	2.52962e-25	8.47302e-23
cg00995807	XRCC3	14	104172224	OpenSea	Body		NA		NA	-0.0025894	0.832889	2.60315e-25	8.71094e-23
cg00289254		11	65197783	OpenSea			NA		NA	-0.00525552	0.16946	2.61989e-25	8.75859e-23
cg01028925	MAD1L1	7	2122103	OpenSea	Body		TRUE		TRUE	0.00269464	0.411689	2.64973e-25	8.84688e-23
cg01116568	AMPD3	11	10476529	S_Shelf	TSS200		NA		TRUE	0.00446106	0.361725	2.65137e-25	8.84688e-23
cg00445591	EEFSEC	3	127999762	OpenSea	Body		TRUE		NA	0.00421622	0.530635	2.66129e-25	8.87153e-23
cg13714026	CDH23	10	73385503	OpenSea	Body		TRUE	Unclassified_Cell_type_specific	NA	0.00556599	0.47094	2.68113e-25	8.92913e-23
cg27338353		22	46471129	S_Shelf		RDMR	NA	Promoter_Associated_Cell_type_specific	NA	-0.0051577	0.781879	2.69337e-25	8.96135e-23
cg23001905		19	1265302	N_Shore			NA	Unclassified_Cell_type_specific	TRUE	0.00454175	0.661092	2.72697e-25	9.06452e-23
cg12346491		4	145277815	OpenSea			TRUE		NA	0.00335036	0.173816	2.7404e-25	9.10049e-23
cg07616394	HHEX	10	94452554	S_Shore	Body	RDMR	NA		NA	0.00531446	0.16401	2.75571e-25	9.13769e-23
cg02464901		2	188851274	OpenSea			TRUE		NA	0.00396378	0.532864	2.75683e-25	9.13769e-23
cg00999152	CYP26B1	2	72369887	N_Shore	Body		TRUE		NA	0.00354436	0.386833	2.77002e-25	9.17272e-23
cg26108017	FAM178B	2	97548061	OpenSea	Body		TRUE		NA	0.00286523	0.705095	2.77846e-25	9.19194e-23
cg00766289	TSPAN9	12	3311121	S_Shore	Body		TRUE	Unclassified_Cell_type_specific	NA	0.0063401	0.688667	2.78223e-25	9.19572e-23
cg01378159	CYTH4	22	37703496	OpenSea	Body	DMR	TRUE	Promoter_Associated	TRUE	0.00264438	0.222221	2.80269e-25	9.23979e-23
cg15468423	GNG7	19	2700763	N_Shore	5'UTR	CDMR	NA		NA	0.00276541	0.223505	2.80315e-25	9.23979e-23
cg16636721	DIP2A	21	47920571	S_Shore	Body		NA	Gene_Associated_Cell_type_specific	NA	-0.00401227	0.622217	2.8035e-25	9.23979e-23
cg13132404	FHL3	1	38471629	S_Shore	TSS1500		NA	Promoter_Associated	TRUE	0.00286962	0.560014	2.89475e-25	9.53155e-23
cg03439687	AKAP11	13	42894507	OpenSea	3'UTR		TRUE		NA	0.00498287	0.533721	2.90469e-25	9.55526e-23
cg03179542	IQCE	7	2647333	S_Shore	Body		NA	Unclassified_Cell_type_specific	TRUE	0.00257132	0.551097	2.90796e-25	9.55703e-23
cg02771336	ASAP1	8	131289180	OpenSea	Body		TRUE		NA	0.0036189	0.345891	2.91133e-25	9.5591e-23
cg11181763	EBF1	5	158379078	OpenSea	Body		TRUE	Unclassified_Cell_type_specific	NA	0.00391697	0.724841	2.94259e-25	9.65265e-23
cg00057722		18	45934156	N_Shore		RDMR	NA		NA	0.00349146	0.381075	2.95073e-25	9.67028e-23
cg13547725	LOC644145	4	56686245	OpenSea	Body		TRUE		NA	-0.00459268	0.418993	2.95495e-25	9.67505e-23
cg16284674	ZNF511	10	135123337	Island	Body		NA	Promoter_Associated	NA	-0.00553496	0.787164	2.96377e-25	9.68832e-23
cg23754392	BMI1	10	22611454	N_Shelf	5'UTR	RDMR	NA		NA	0.00334795	0.133908	2.96455e-25	9.68832e-23
cg08640804		1	48058390	N_Shore			TRUE		NA	0.00305819	0.55487	2.97191e-25	9.70328e-23
cg10622911		1	47998776	N_Shore			NA		TRUE	0.00210746	0.291607	2.97693e-25	9.7106e-23
cg00454862		1	192983012	OpenSea			TRUE		NA	0.00337223	0.390088	2.99851e-25	9.77187e-23
cg01516372	LOC339524	1	87617972	Island	Body	DMR	TRUE	Unclassified	TRUE	0.0035692	0.322125	3.00735e-25	9.7873e-23
cg05620261	WTIP	19	34991070	S_Shelf	Body		TRUE	Unclassified	NA	0.00407472	0.392726	3.00885e-25	9.7873e-23
cg02343275	TMEM206	1	212589072	S_Shore	TSS1500		NA		NA	0.00341246	0.779197	3.02588e-25	9.83356e-23
cg07162210	JARID2	6	15391271	OpenSea	Body		TRUE	Promoter_Associated	NA	0.00258691	0.741404	3.05747e-25	9.92697e-23
cg26768556	PDK2	17	48179239	OpenSea	Body		TRUE		TRUE	0.00205833	0.30851	3.065e-25	9.94218e-23
cg12194864	2020-09-09	17	75463025	OpenSea	Body		TRUE		NA	0.00304605	0.574453	3.07483e-25	9.96482e-23
cg04880751	KMO	1	241695164	OpenSea	TSS1500		NA	Promoter_Associated	NA	-0.00677453	0.580933	3.18598e-25	1.03154e-22
cg22040039		12	112195089	OpenSea			TRUE		NA	-0.00348279	0.742485	3.19432e-25	1.03316e-22
cg21249595		6	30848811	N_Shelf			NA		NA	0.00209598	0.317249	3.19688e-25	1.03316e-22
cg19203115	B4GALT6	18	29263741	N_Shore	Body	RDMR	NA		NA	0.00409695	0.321461	3.2449e-25	1.04771e-22
cg01942845	RNU5E	5	80692267	S_Shelf	Body		NA		NA	-0.00549751	0.479555	3.28225e-25	1.05879e-22
cg03896542	GNAO1	16	56378687	OpenSea	Body		NA	Unclassified_Cell_type_specific	TRUE	0.00295095	0.528512	3.28962e-25	1.06019e-22
cg11692403		10	72191087	OpenSea			TRUE		NA	-0.00437588	0.723476	3.29719e-25	1.06165e-22
cg03884238	C9orf152	9	112970590	OpenSea	TSS200		NA		NA	-0.00339215	0.886591	3.30206e-25	1.06224e-22
cg13321745	MSI1	12	120800066	S_Shore	Body		TRUE		TRUE	0.0048672	0.468682	3.3405e-25	1.07361e-22
cg25508181		5	110971507	OpenSea			TRUE		NA	-0.00559616	0.621469	3.36547e-25	1.08065e-22
cg11481582		10	74080805	S_Shore			TRUE		TRUE	0.00386328	0.511664	3.39193e-25	1.08814e-22
cg03208245	MTSS1L	16	70717902	N_Shore	Body		NA	Unclassified_Cell_type_specific	NA	-0.00268945	0.55899	3.49887e-25	1.12142e-22
cg10866060		12	83592588	OpenSea			TRUE		NA	0.00391592	0.339946	3.54471e-25	1.13507e-22
cg04024822	RPS6KA4	11	64136015	Island	Body		NA		NA	0.00340258	0.549182	3.54825e-25	1.13516e-22
cg13465946	NFIX	19	13208349	Island	3'UTR	RDMR	TRUE		NA	0.00688415	0.483658	3.59285e-25	1.14838e-22
cg15161667	LRP4	11	46940613	S_Shore	TSS1500		NA		TRUE	0.00362841	0.541069	3.60464e-25	1.15061e-22
cg00044299	KCTD1	18	24126361	N_Shore	5'UTR		TRUE	Unclassified_Cell_type_specific	NA	0.00755527	0.737889	3.60642e-25	1.15061e-22
cg06349050	SPSB1	1	9380756	OpenSea	5'UTR		TRUE		NA	0.00371745	0.563194	3.66638e-25	1.16867e-22
cg16190688	CDK2	12	56359210	N_Shore	TSS1500		NA		NA	0.00417765	0.581738	3.68383e-25	1.17317e-22
cg04922566	IL17RD	3	57198244	Island	Body		NA		NA	0.00281246	0.205984	3.68813e-25	1.17347e-22
cg03225208	DAB2IP	9	124412094	N_Shore	Body		TRUE		NA	0.00389875	0.460758	3.71255e-25	1.18016e-22
cg10570158	NAV2	11	19546133	OpenSea	Body		TRUE		NA	0.0023825	0.0791254	3.72196e-25	1.18208e-22
cg21163444	ZNF385A	12	54765670	S_Shore	Body		TRUE		NA	-0.00541929	0.171043	3.74036e-25	1.18635e-22
cg10299976		10	94455543	Island			NA		NA	0.00301887	0.102488	3.74221e-25	1.18635e-22
cg02459543		8	94924611	N_Shelf			NA		NA	-0.00364461	0.866088	3.83206e-25	1.21374e-22
cg20139800	GABBR1	6	29599178	N_Shore	Body	RDMR	NA		NA	0.00313438	0.2538	3.84854e-25	1.21785e-22
cg15299510	TACC1	8	38628105	OpenSea	5'UTR		TRUE	Promoter_Associated	NA	0.0031586	0.390775	3.88558e-25	1.22846e-22
cg07866001	TRIO	5	14440492	OpenSea	Body	RDMR	NA		TRUE	0.00395838	0.257623	3.93017e-25	1.24143e-22
cg05506292	AKAP13	15	85925235	S_Shore	5'UTR		NA		NA	0.00227941	0.243547	3.94169e-25	1.24395e-22
cg12613020		5	134881662	S_Shore		RDMR	NA		NA	0.0043482	0.35383	3.95232e-25	1.24617e-22
cg02194129	XRCC3	14	104171313	OpenSea	Body		NA		NA	-0.002888	0.673809	4.03577e-25	1.27134e-22
cg13522406	PPP1R10	6	30581820	N_Shelf	5'UTR		NA		NA	-0.00328996	0.587352	4.1186e-25	1.29627e-22
cg20698421	SLC1A4	2	65217623	S_Shore	Body		NA	Promoter_Associated	NA	0.00365996	0.319527	4.14995e-25	1.30495e-22
cg09427718	PPARGC1A	4	23819929	OpenSea	Body		TRUE		NA	0.00423726	0.305171	4.15771e-25	1.30622e-22
cg12120406	KSR1	17	25822056	OpenSea	5'UTR		TRUE		NA	-0.00373673	0.823181	4.18754e-25	1.31376e-22
cg12049875	RIN2	20	19955868	Island	Body		NA		TRUE	-0.00513687	0.398629	4.18922e-25	1.31376e-22
cg04840290	NODAL	10	72201668	S_Shore	TSS1500	RDMR	TRUE		TRUE	0.00217962	0.271104	4.26595e-25	1.33662e-22
cg13519902		3	50639079	OpenSea			TRUE	Promoter_Associated	TRUE	-0.00356161	0.319572	4.28052e-25	1.33998e-22
cg01854499		8	102054564	OpenSea			TRUE		NA	0.00374907	0.556474	4.28895e-25	1.34142e-22
cg16348385	YPEL3	16	30106822	N_Shore	1stExon		TRUE	Promoter_Associated	NA	-0.00223653	0.137497	4.29696e-25	1.34272e-22
cg01078772	KIF3B	20	30920486	OpenSea	3'UTR		TRUE		NA	-0.00363128	0.83001	4.32529e-25	1.34996e-22
cg25446329	C10orf140	10	21802824	N_Shelf	3'UTR		NA		NA	0.0084604	0.545616	4.32784e-25	1.34996e-22
cg09276998	SVIL	10	29991884	OpenSea	5'UTR		TRUE	Unclassified_Cell_type_specific	NA	-0.00429635	0.125601	4.33547e-25	1.35113e-22
cg21416237	FKBP10	17	39970091	S_Shore	Body		NA	Unclassified_Cell_type_specific	NA	0.00288667	0.275958	4.46464e-25	1.39015e-22
cg25371332		2	10688317	OpenSea			TRUE		NA	0.00273194	0.358757	4.51015e-25	1.40234e-22
cg13515064		13	113611440	OpenSea		CDMR	TRUE		NA	0.00292627	0.475612	4.51183e-25	1.40234e-22
cg05146756	LOC554202	9	21558871	N_Shore	Body		NA	Unclassified_Cell_type_specific	NA	0.00337588	0.110139	4.537e-25	1.40891e-22
cg19466906	GMDS	6	1708566	OpenSea	Body		NA		NA	0.00331434	0.721389	4.55899e-25	1.41448e-22
cg15388210	KIAA0319L	1	36005826	OpenSea	Body		TRUE		NA	-0.00454131	0.562512	4.56851e-25	1.41618e-22
cg27657537	MED15	22	20863762	S_Shore	Body	RDMR	NA		TRUE	-0.00320253	0.163003	4.5775e-25	1.41771e-22
cg18143317		11	2037124	S_Shelf			NA		NA	0.00262695	0.641716	4.69411e-25	1.45253e-22
cg01528369		14	105037685	N_Shelf			NA		NA	0.0042008	0.287497	4.72235e-25	1.45998e-22
cg23751171		12	92618924	OpenSea			TRUE		NA	0.0040695	0.762582	4.76615e-25	1.47222e-22
cg08320413	MMP21	10	127455161	OpenSea	3'UTR		NA		NA	-0.00485871	0.840302	4.77326e-25	1.47311e-22
cg01961086	PRDM16	1	3086487	OpenSea	Body		TRUE		TRUE	0.0059227	0.230698	4.79001e-25	1.47698e-22
cg17232217	LOC100130872	4	1203104	Island	TSS1500		NA		NA	-0.00276868	0.836532	4.8238e-25	1.48608e-22
cg12651761	LLGL1	17	18128022	N_Shore	TSS1500		NA		NA	0.00436863	0.518263	4.8721e-25	1.49964e-22
cg26330809		6	112620506	OpenSea			TRUE		NA	-0.00323468	0.756909	4.94649e-25	1.5212e-22
cg04106196		16	54611564	OpenSea			TRUE		NA	0.00587176	0.380809	5.03316e-25	1.54649e-22
cg07598561		15	41218984	Island		RDMR	TRUE		NA	0.00236587	0.245364	5.09322e-25	1.56357e-22
cg14521421	ST5	11	8862019	OpenSea	5'UTR		TRUE		NA	0.00232681	0.133115	5.1008e-25	1.56452e-22
cg24402165	LGR4	11	27427559	OpenSea	Body		TRUE		NA	-0.00305287	0.798883	5.11334e-25	1.56699e-22
cg12419334	WWC2	4	184121800	OpenSea	Body		TRUE		TRUE	-0.00643773	0.192291	5.1587e-25	1.57951e-22
cg26925644	PHLDB1	11	118476517	N_Shore	TSS1500		TRUE		TRUE	0.00253643	0.172406	5.16589e-25	1.58032e-22
cg15872458	ZNF385A	12	54784747	N_Shore	Body		NA	Unclassified_Cell_type_specific	TRUE	0.00418818	0.434474	5.2166e-25	1.59444e-22
cg03361102		2	45160554	N_Shore			NA		NA	0.00347803	0.206231	5.22376e-25	1.59523e-22
cg19981796	EVI5L	19	7928066	Island	Body		NA		NA	0.00202727	0.12148	5.26963e-25	1.60784e-22
cg19375854	EHD4	15	42242227	OpenSea	Body		TRUE		NA	0.00392917	0.265239	5.28016e-25	1.60964e-22
cg14141912	ATOH8	2	85992696	OpenSea	Body		TRUE		NA	0.00221316	0.117872	5.28888e-25	1.61013e-22
cg18838941	FAM171A1	10	15376939	OpenSea	Body		TRUE		NA	-0.00357234	0.850893	5.29098e-25	1.61013e-22
cg10675614	RRAGD	6	90120254	N_Shore	Body	RDMR	NA	Unclassified_Cell_type_specific	NA	0.00580795	0.768133	5.2984e-25	1.61099e-22
cg16404170	FAM53B	10	126330876	OpenSea	Body		NA	Promoter_Associated	NA	-0.00347836	0.835927	5.38278e-25	1.63522e-22
cg14270002	ARHGEF7	13	111935521	Island	Body		NA		NA	-0.00633917	0.812214	5.42098e-25	1.64539e-22
cg09999348	PRKCE	2	46398848	OpenSea	Body		TRUE		TRUE	0.00204617	0.19578	5.43733e-25	1.64892e-22
cg00571819	LOC100272217	9	133455886	S_Shore	TSS1500		NA		NA	-0.00418956	0.527609	5.49616e-25	1.66532e-22
cg11428546	AFF3	2	100723110	S_Shelf	TSS1500	CDMR	TRUE		NA	0.00500906	0.206788	5.51186e-25	1.66863e-22
cg12187358	LAYN	11	111420270	OpenSea	Body		TRUE		NA	0.00314924	0.60456	5.58811e-25	1.69025e-22
cg05516295		5	134526124	N_Shore		CDMR	NA		NA	0.00557344	0.679909	5.60293e-25	1.69167e-22
cg10604373		3	194004692	OpenSea			TRUE		NA	0.00446418	0.308382	5.60549e-25	1.69167e-22
cg14625040		2	6214447	OpenSea			TRUE		NA	0.00293794	0.586228	5.60735e-25	1.69167e-22
cg26365925		3	44063315	Island			NA		NA	0.00297322	0.109698	5.76764e-25	1.73853e-22
cg00643814		12	106573195	OpenSea			TRUE		NA	0.00286719	0.548898	5.7944e-25	1.74509e-22
cg02881127		6	147760069	OpenSea			TRUE		NA	0.00274029	0.786256	5.8514e-25	1.76074e-22
cg11132534		2	218114431	OpenSea			TRUE		NA	0.00366126	0.289862	5.85786e-25	1.76116e-22
cg08247289	ATP11A	13	113400754	OpenSea	Body		NA		NA	-0.00462461	0.843834	5.88244e-25	1.76599e-22
cg15960924	GPD1L	3	32151282	S_Shelf	Body		NA		NA	-0.00563114	0.50441	5.88403e-25	1.76599e-22
cg01389386	ST3GAL2	16	70471055	N_Shore	5'UTR		NA	Unclassified	TRUE	0.00294607	0.229406	5.9224e-25	1.77598e-22
cg22931002	FAM178B	2	97541870	OpenSea	3'UTR		TRUE		TRUE	0.00266907	0.535273	5.96395e-25	1.78691e-22
cg23234622		2	11621543	N_Shore			NA		NA	0.0037564	0.790553	5.97122e-25	1.78755e-22
cg03401519		2	177042493	N_Shore			TRUE	Unclassified_Cell_type_specific	TRUE	0.0044971	0.5142	6.00127e-25	1.79501e-22
cg12667125	C1orf216	1	36181447	N_Shelf	Body		TRUE	Gene_Associated	TRUE	0.00177818	0.387501	6.06883e-25	1.81367e-22
cg18389931	UNC5B	10	72978724	S_Shore	Body		NA	Unclassified_Cell_type_specific	NA	0.00234027	0.732889	6.15937e-25	1.83915e-22
cg15999165	PAM	5	102201421	N_Shore	TSS200		NA		NA	0.00281822	0.18028	6.17225e-25	1.84142e-22
cg22588546	MYH10	17	8382941	S_Shelf	Body		NA		TRUE	-0.0053186	0.810184	6.23338e-25	1.85807e-22
cg02891579	KAZALD1	10	102823812	S_Shore	Body	RDMR	NA		NA	0.00273537	0.45533	6.34092e-25	1.88852e-22
cg16654432	ALCAM	3	105167621	OpenSea	Body		TRUE		NA	0.00252961	0.247497	6.41686e-25	1.90951e-22
cg08822118	EIF4G1	3	184037481	OpenSea	Body		TRUE		TRUE	-0.00463385	0.719719	6.48331e-25	1.92764e-22
cg01109227	TULP1	6	35480779	S_Shore	TSS200		NA	Unclassified_Cell_type_specific	NA	0.00331559	0.13821	6.53063e-25	1.94006e-22
cg22357164	RNF213	17	78237117	S_Shore	5'UTR		TRUE	Promoter_Associated	TRUE	-0.00303258	0.540615	6.53879e-25	1.94083e-22
cg03553278	HOXD1	2	177055168	S_Shore	3'UTR		NA	Unclassified_Cell_type_specific	NA	0.00241695	0.153054	6.56851e-25	1.948e-22
cg02235659	CLEC3B	3	45066580	OpenSea	TSS1500		NA		NA	-0.00475327	0.584014	6.59177e-25	1.95324e-22
cg13761284	FAM102A	9	130708393	S_Shore	Body		NA		NA	-0.00528483	0.454564	6.60239e-25	1.95397e-22
cg04236334	GRRP1	1	26487591	N_Shore	5'UTR		NA		NA	0.00229749	0.421128	6.60542e-25	1.95397e-22
cg11766468	EVI5L	19	7923041	N_Shelf	Body	DMR	NA	Unclassified_Cell_type_specific	TRUE	0.00452567	0.152106	6.61624e-25	1.95551e-22
cg13347910	GCNT2	6	10555853	OpenSea	TSS200		TRUE		NA	0.00274178	0.213312	6.64897e-25	1.96352e-22
cg18475969		3	177077202	OpenSea		DMR	NA		NA	0.00306659	0.204292	6.72861e-25	1.98537e-22
cg22064610	CEP164	11	117282521	OpenSea	Body		TRUE		NA	0.00264859	0.646049	6.73622e-25	1.98594e-22
cg24058365	SLC16A4	1	110923328	OpenSea	Body		TRUE	Unclassified_Cell_type_specific	NA	-0.00798714	0.69541	6.77601e-25	1.99364e-22
cg16409259	LRP5	11	68117110	S_Shore	Body		NA		NA	-0.00367873	0.86684	6.77788e-25	1.99364e-22
cg00094006		1	47976007	S_Shelf			NA		NA	0.00369983	0.843395	6.77947e-25	1.99364e-22
cg15394558	CCDC42	17	8648180	N_Shore	TSS200		NA		NA	0.00285889	0.406957	6.89658e-25	2.02637e-22
cg10487998	ALPL	1	21838665	S_Shelf	5'UTR		NA		TRUE	-0.00378349	0.27952	6.92833e-25	2.03345e-22
cg08545493	NRN1	6	6004762	Island	Body		NA		TRUE	0.00108544	0.0403867	6.9323e-25	2.03345e-22
cg03342674		9	140193776	N_Shore			NA		NA	0.00364348	0.323573	6.97181e-25	2.04332e-22
cg16129132	OSBPL5	11	3182119	Island	5'UTR		NA		TRUE	0.0029698	0.207243	6.98078e-25	2.04423e-22
cg04499029	LYL1	19	13210356	Island	Body		NA	Promoter_Associated	NA	0.00519972	0.3482	7.00812e-25	2.05052e-22
cg01286133	APP	21	27540106	N_Shore	Body	RDMR	NA		NA	0.00312354	0.603601	7.02082e-25	2.05252e-22
cg27385773	SEMA3F	3	50201416	OpenSea	Body		TRUE		TRUE	-0.0047278	0.529896	7.05468e-25	2.06064e-22
cg04657684	ELMOD1	11	107519203	OpenSea	Body		TRUE		NA	0.00369564	0.326387	7.06041e-25	2.06064e-22
cg00473597	RFX2	19	6108131	N_Shore	5'UTR		NA		NA	0.00299251	0.41552	7.08052e-25	2.06479e-22
cg00568910		1	43429380	OpenSea			TRUE	Unclassified_Cell_type_specific	TRUE	0.00370429	0.327888	7.09463e-25	2.06718e-22
cg18892808	CUGBP2	10	11207969	Island	Body		NA	Promoter_Associated	TRUE	0.00404101	0.137178	7.11211e-25	2.06925e-22
cg13492227	FGF11	17	7341436	N_Shore	TSS1500		TRUE	Unclassified	NA	0.00337567	0.227396	7.11361e-25	2.06925e-22
cg19730887	NR2C2	3	15085146	OpenSea	3'UTR		NA		NA	-0.00293463	0.65739	7.15621e-25	2.07955e-22
cg04221117	CUGBP2	10	11206221	N_Shore	Body	CDMR	NA	Unclassified	NA	0.00576405	0.314854	7.16091e-25	2.07955e-22
cg12221621	SPSB1	1	9381317	OpenSea	5'UTR		TRUE	Unclassified_Cell_type_specific	TRUE	0.00274189	0.406498	7.18348e-25	2.08301e-22
cg01246961	NEU2	2	233896318	OpenSea	TSS1500		TRUE		NA	0.00306295	0.561139	7.18473e-25	2.08301e-22
cg22379776		13	45396698	OpenSea			NA		NA	0.00349788	0.871691	7.25813e-25	2.10254e-22
cg12281446	SNAP23	15	42787302	S_Shelf	TSS1500		NA	Promoter_Associated	NA	-0.0039042	0.301873	7.43089e-25	2.1508e-22
cg17743250	CYP26C1	10	94820927	Island	TSS200		NA	Unclassified_Cell_type_specific	NA	0.00531863	0.264806	7.44921e-25	2.15432e-22
cg15672329	FCHSD2	11	72810987	OpenSea	Body		NA		NA	0.00417101	0.83618	7.48268e-25	2.16221e-22
cg08621778	ARL8A	1	202102420	OpenSea	3'UTR		TRUE		NA	-0.00568339	0.743615	7.50307e-25	2.16563e-22
cg06897661	ADCY7	16	50322074	OpenSea	5'UTR		NA		NA	-0.00362125	0.8096	7.5069e-25	2.16563e-22
cg01135546		17	45949828	Island			NA		NA	0.00335552	0.178714	7.53427e-25	2.17173e-22
cg08463788	LHX9	1	197888068	S_Shore	Body		NA		NA	0.00194667	0.117425	7.55788e-25	2.17539e-22
cg04408104	WDSUB1	2	160106670	OpenSea	Body		TRUE		NA	-0.0053534	0.537321	7.55943e-25	2.17539e-22
cg21734356	DLGAP1	18	3498854	N_Shore	3'UTR		TRUE		NA	0.00326735	0.475177	7.84366e-25	2.25533e-22
cg03095562	HEY2	6	126071467	S_Shore	Body	DMR	NA		NA	0.00234508	0.109624	7.88185e-25	2.26444e-22
cg14467654	MIR219-2	9	131155819	Island	TSS1500		NA		NA	0.00305635	0.320936	7.94081e-25	2.27951e-22
cg17819732		1	203147367	OpenSea			TRUE		TRUE	0.00459822	0.294433	7.98018e-25	2.28893e-22
cg10411272	SORBS2	4	186559707	N_Shore	Body		NA		NA	0.00407311	0.453164	8.0162e-25	2.29737e-22
cg01962471	ZDHHC14	6	157876936	OpenSea	Body		TRUE		NA	0.00241029	0.399797	8.04376e-25	2.30311e-22
cg23882945	ALPK1	4	113300580	Island	Body	RDMR	TRUE		NA	0.00358738	0.457335	8.04939e-25	2.30311e-22
cg11622162	RNF213	17	78237543	S_Shelf	Body		TRUE	Promoter_Associated	TRUE	-0.00548547	0.635883	8.06057e-25	2.30442e-22
cg19422300	CHRNA4	20	61989375	N_Shelf	Body		NA	Unclassified_Cell_type_specific	NA	-0.00294201	0.77784	8.07173e-25	2.30572e-22
cg07854959	IGF2BP1	17	47093489	S_Shore	Body	RDMR	NA		TRUE	-0.0054326	0.54987	8.08329e-25	2.30714e-22
cg20037575		15	96886839	N_Shore			NA		NA	0.00530825	0.232275	8.10002e-25	2.31003e-22
cg20438687	MINK1	17	4761644	OpenSea	Body		TRUE		TRUE	0.0028322	0.307814	8.12372e-25	2.3149e-22
cg26981432	ENTPD4	8	23307949	OpenSea	5'UTR		TRUE		NA	0.00271212	0.687104	8.14269e-25	2.31841e-22
cg16906765		15	75475038	S_Shelf			NA	Unclassified_Cell_type_specific	NA	0.00297095	0.256758	8.15477e-25	2.31996e-22
cg06040811	MEF2C	5	88018605	OpenSea	Body		TRUE		NA	0.00422985	0.752081	8.21865e-25	2.33623e-22
cg00782811	RCAN2	6	46293734	OpenSea	TSS1500		TRUE		NA	0.00258812	0.393341	8.33219e-25	2.36658e-22
cg10520780	ZNF423	16	49655451	OpenSea	Body		TRUE		NA	0.00328899	0.327258	8.45146e-25	2.39742e-22
cg19934294	MFSD10	4	2933421	N_Shore	Body		NA		NA	-0.00324386	0.644354	8.45451e-25	2.39742e-22
cg27265573		14	54686707	OpenSea		RDMR	TRUE		NA	0.00209312	0.109781	8.57292e-25	2.42903e-22
cg13714797	KDM4C	9	7103479	OpenSea	Body		TRUE		NA	0.00436309	0.312626	8.6293e-25	2.44302e-22
cg05885012	CUEDC1	17	55980673	OpenSea	5'UTR		NA	Unclassified_Cell_type_specific	TRUE	-0.00383087	0.172209	8.67444e-25	2.45381e-22
cg18730926	PCDP1	2	120396872	OpenSea	Body		TRUE		NA	0.00217226	0.170479	8.68459e-25	2.4547e-22
cg25146042	KIAA1522	1	33236105	S_Shore	Body		NA		NA	0.003363	0.668542	8.71339e-25	2.46084e-22
cg03786842	DHX32	10	127569751	OpenSea	5'UTR		TRUE		NA	0.00356448	0.301902	8.792e-25	2.48104e-22
cg01441113	SORBS2	4	186560403	S_Shore	Body		NA		NA	0.00467222	0.35201	8.8054e-25	2.48282e-22
cg09519218	FAM53B	10	126390317	OpenSea	Body		TRUE		NA	-0.00399245	0.540705	8.86643e-25	2.49801e-22
cg07398661	CSNK1A1P	15	37111929	S_Shore	TSS1500		NA		NA	0.00342135	0.379269	8.89906e-25	2.50518e-22
cg23484599	PAX6	11	31831137	N_Shore	5'UTR	RDMR	NA	Unclassified_Cell_type_specific	NA	0.00354455	0.260073	9.00579e-25	2.53319e-22
cg19272592	TMCC1	3	129408521	OpenSea	Body		NA		NA	0.0039375	0.796345	9.02954e-25	2.53582e-22
cg10835286		2	66657913	N_Shelf			NA		NA	0.00305147	0.107589	9.02966e-25	2.53582e-22
cg08456420	MACF1	1	39570175	N_Shore	Body	RDMR	TRUE		NA	0.0026473	0.516018	9.07957e-25	2.54779e-22
cg04619120	ASPH	8	62520228	OpenSea	Body		TRUE		NA	-0.00593019	0.803886	9.09267e-25	2.54941e-22
cg08627986	SYT15	10	46966245	N_Shelf	Body		NA		NA	-0.00315394	0.835525	9.13624e-25	2.55958e-22
cg13959031	ISCA1	9	88896340	N_Shore	Body		NA		NA	0.00356879	0.233222	9.15526e-25	2.56285e-22
cg14640066	RTN4	2	55237421	OpenSea	Body		NA	Promoter_Associated	NA	-0.00401456	0.205034	9.19058e-25	2.57068e-22
cg03359362	SLC1A5	19	47289611	N_Shore	TSS1500	RDMR	NA	Promoter_Associated	NA	0.00313585	0.119051	9.21163e-25	2.5745e-22
cg03675258	NFIX	19	13124691	Island	Body		NA	Unclassified_Cell_type_specific	TRUE	0.00916902	0.61371	9.22692e-25	2.57671e-22
cg04347447	CACNA2D2	3	50541467	S_Shore	TSS1500		NA	Unclassified_Cell_type_specific	NA	0.00157446	0.334077	9.29094e-25	2.59252e-22
cg14214797	CCDC88C	14	91860613	OpenSea	Body		TRUE		NA	0.00358273	0.693733	9.30004e-25	2.59299e-22
cg03374695	FAM84B	8	127568328	N_Shore	3'UTR		NA		NA	0.00293018	0.189055	9.32933e-25	2.59908e-22
cg24731441	LOC400931	22	46481822	Island	TSS200		NA		TRUE	-0.00352938	0.547407	9.38867e-25	2.61353e-22
cg18646521		2	111875858	Island		RDMR	NA		NA	0.00303942	0.105337	9.45436e-25	2.62972e-22
cg07168837	PRDM16	1	3037275	N_Shore	Body		NA		NA	0.00266346	0.743517	9.48043e-25	2.63487e-22
cg10888461	ALPK1	4	113300821	S_Shore	Body	RDMR	TRUE		NA	0.00482084	0.431409	9.59208e-25	2.66251e-22
cg01404873	DLEU2	13	50701050	Island	TSS1500	RDMR	NA		NA	0.00477389	0.423314	9.59512e-25	2.66251e-22
cg14212180	NFIC	19	3365201	N_Shore	TSS1500	RDMR	NA	Unclassified_Cell_type_specific	NA	0.00475867	0.82925	9.64319e-25	2.67373e-22
cg09645993		5	77289836	OpenSea			TRUE		NA	0.00488595	0.829779	9.65907e-25	2.67601e-22
cg06786600		17	38666816	OpenSea			TRUE		NA	0.00291984	0.451609	9.70812e-25	2.68746e-22
cg08489551	PLEKHG5	1	6531260	Island	Body		NA		NA	0.0041501	0.735162	9.77876e-25	2.70488e-22
cg24541021		2	218896725	N_Shore			NA	Unclassified_Cell_type_specific	NA	-0.00327528	0.739999	9.80567e-25	2.71017e-22
cg14223856		9	139508740	OpenSea			TRUE	Unclassified	NA	0.00268232	0.486041	9.94232e-25	2.74577e-22
cg20511489	ARNT2	15	80724053	OpenSea	Body		TRUE		NA	0.00327925	0.697314	1.00565e-24	2.77475e-22
cg06633543	CYP46A1	14	100151561	S_Shore	Body		NA		NA	0.00633746	0.436652	1.00631e-24	2.77475e-22
cg24450653	RBBP5	1	205060293	OpenSea	Body		TRUE		NA	-0.00395892	0.730741	1.00763e-24	2.7762e-22
cg24939838	PRDM16	1	3164390	Island	Body	DMR	TRUE		NA	0.00551816	0.163541	1.01356e-24	2.79034e-22
cg18315762	AGXT	2	241808004	OpenSea	TSS200		NA		TRUE	0.0046174	0.384409	1.01906e-24	2.80327e-22
cg23824666	GPX5	6	28493661	OpenSea	TSS200		NA		NA	-0.00395595	0.707105	1.01987e-24	2.80329e-22
cg09037813	LRRFIP1	2	238599761	N_Shore	TSS1500		NA		NA	0.00227685	0.333649	1.05227e-24	2.89007e-22
cg17083685		13	90053523	OpenSea			TRUE		NA	-0.00644981	0.222106	1.063e-24	2.91723e-22
cg03066050	KLF4	9	110249749	Island	Body		NA	Unclassified	NA	0.00348973	0.132257	1.06388e-24	2.91737e-22
cg21829923	SP5	2	171573891	Island	Body		NA		NA	0.00464779	0.155511	1.06586e-24	2.92049e-22
cg12743031	PTK2B	8	27219512	OpenSea	5'UTR		TRUE	Unclassified	TRUE	0.00273915	0.495247	1.06914e-24	2.92719e-22
cg10389812	IGF1R	15	99458162	OpenSea	Body		TRUE		TRUE	-0.00515019	0.779705	1.07357e-24	2.93703e-22
cg06930722	CHST11	12	105114327	OpenSea	Body		NA	Promoter_Associated_Cell_type_specific	NA	0.00505452	0.199655	1.07528e-24	2.93939e-22
cg22115093	C11orf9	11	61525922	OpenSea	Body		NA		NA	0.00264027	0.443538	1.08037e-24	2.95099e-22
cg19889066		5	74330425	N_Shore			NA	Unclassified_Cell_type_specific	NA	-0.00414306	0.706656	1.09083e-24	2.97725e-22
cg02483701	HOXA10	7	27215610	S_Shore	Body		NA	Unclassified_Cell_type_specific	NA	0.00317882	0.304954	1.09591e-24	2.98877e-22
cg20668096	LRBA	4	151500192	N_Shore	Body	RDMR	TRUE		NA	0.00736887	0.542206	1.10669e-24	3.01582e-22
cg18205770		5	87439353	S_Shore			NA		NA	0.0066663	0.252585	1.10805e-24	3.01717e-22
cg03654166	MAP1D	2	172944393	N_Shore	Body	RDMR	NA	Unclassified_Cell_type_specific	NA	0.00470166	0.559148	1.11126e-24	3.02356e-22
cg16062483	C14orf64	14	98444417	OpenSea	Body		NA	Unclassified_Cell_type_specific	NA	-0.00666533	0.401805	1.1201e-24	3.04523e-22
cg03978242	PLEKHH3	17	40822497	Island	Body		NA		NA	0.00230258	0.304228	1.12315e-24	3.05114e-22
cg18484299	GORASP2	2	171787393	S_Shore	Body	RDMR	NA		NA	-0.00421044	0.548951	1.12802e-24	3.062e-22
cg05711474		3	57937462	OpenSea			TRUE		TRUE	0.00193896	0.129979	1.13636e-24	3.08224e-22
cg23136275	MEF2C	5	88188704	S_Shelf	5'UTR		NA		NA	0.00531634	0.685317	1.14348e-24	3.09916e-22
cg02133716	PVT1	8	128981622	OpenSea	Body		TRUE	Unclassified_Cell_type_specific	TRUE	0.00282194	0.835027	1.15323e-24	3.1223e-22
cg06659691		4	81134512	OpenSea			TRUE		NA	0.00273933	0.692596	1.15381e-24	3.1223e-22
cg12094552		21	46449961	S_Shore			TRUE		TRUE	0.00319719	0.632205	1.17246e-24	3.17033e-22
cg12363903		5	134526269	N_Shore		CDMR	NA		NA	0.0066304	0.767214	1.18375e-24	3.19837e-22
cg27090029	ARAP1	11	72408394	Island	Body		TRUE		TRUE	0.0026954	0.547914	1.19511e-24	3.22658e-22
cg08683249	RSPH9	6	43612627	N_Shore	TSS200		NA		TRUE	0.00259804	0.205729	1.19616e-24	3.22691e-22
cg12614090	ABLIM1	10	116444240	OpenSea	1stExon		TRUE		NA	-0.00376308	0.215784	1.20421e-24	3.24611e-22
cg01281718	SMAP1	6	71376634	N_Shore	TSS1500		NA	Unclassified_Cell_type_specific	NA	-0.00333319	0.885383	1.22422e-24	3.29751e-22
cg03648155	PPIF	10	81106771	N_Shore	TSS1500		NA	Promoter_Associated	NA	0.00224043	0.468368	1.22704e-24	3.30257e-22
cg05140293	TTLL4	2	219619504	OpenSea	3'UTR		NA		NA	-0.00230161	0.93104	1.22916e-24	3.30573e-22
cg02836046	SIM2	21	38120824	S_Shore	3'UTR		NA		TRUE	0.00498877	0.726071	1.23303e-24	3.31358e-22
cg21757368	C6orf170	6	121656329	S_Shore	TSS1500	CDMR	TRUE	Promoter_Associated	NA	-0.00420374	0.4305	1.23714e-24	3.32206e-22
cg11320084	RNF2	1	185014181	N_Shore	TSS1500		NA		NA	-0.00311923	0.519925	1.25465e-24	3.3665e-22
cg23236366	NAV1	1	201777257	OpenSea	Body		NA		NA	-0.00370273	0.800116	1.26145e-24	3.38216e-22
cg09978533		22	46465160	N_Shore		RDMR	NA		TRUE	-0.00541313	0.495575	1.26301e-24	3.38374e-22
cg03395558	SHANK2	11	70508329	Island	Body		TRUE		TRUE	0.00398229	0.199801	1.26577e-24	3.38854e-22
cg19184449	KRT86	12	52700707	N_Shore	Body		NA	Unclassified_Cell_type_specific	NA	-0.00314441	0.832037	1.26777e-24	3.39128e-22
cg08032476	RAB34	17	27045176	N_Shore	Body		NA	Unclassified	TRUE	0.00223196	0.110799	1.26911e-24	3.39228e-22
cg02863169		2	45173548	S_Shore		RDMR	NA		NA	0.00614876	0.463344	1.30366e-24	3.48142e-22
cg05009605		2	48434367	OpenSea			TRUE		NA	0.00495241	0.771476	1.30446e-24	3.48142e-22
cg27464065	APOLD1	12	12940610	S_Shore	3'UTR		TRUE	Promoter_Associated	NA	-0.00407535	0.684412	1.30653e-24	3.48429e-22
cg09621472	NAA50	3	113439314	OpenSea	3'UTR		NA		NA	-0.00533179	0.590423	1.32549e-24	3.53217e-22
cg14670092		19	10232899	S_Shelf			NA		NA	-0.00491021	0.66838	1.34846e-24	3.59062e-22
cg26525121	CD83	6	14129370	OpenSea	Body		TRUE	Unclassified	NA	0.00397491	0.425366	1.3526e-24	3.59892e-22
cg22550549	NFIX	19	13123217	Island	Body		NA		NA	0.00562342	0.226713	1.35436e-24	3.60086e-22
cg03390207	CORO6	17	27948752	N_Shore	TSS1500		TRUE		NA	0.002402	0.408078	1.3587e-24	3.60966e-22
cg04558278	RFX1	19	14074823	Island	Body		NA		NA	0.00420372	0.780179	1.3667e-24	3.62815e-22
cg03310503		6	45609836	OpenSea			NA		NA	0.00351776	0.514034	1.37909e-24	3.65826e-22
cg01020475	ATP4B	13	114304812	S_Shelf	Body		NA		NA	-0.00410248	0.846106	1.38137e-24	3.66153e-22
cg06086012	CLDN11	3	170143582	OpenSea	Body		TRUE		NA	0.00240978	0.415195	1.39263e-24	3.68858e-22
cg15848159	WDFY3	4	85791643	OpenSea	5'UTR		TRUE		TRUE	0.00364406	0.759245	1.43087e-24	3.78699e-22
cg06433801		4	83384006	OpenSea			TRUE	Gene_Associated	NA	-0.00340692	0.872562	1.44574e-24	3.82345e-22
cg03688699		11	62694712	Island			TRUE	Unclassified_Cell_type_specific	NA	0.00234488	0.0883828	1.4653e-24	3.87224e-22
cg24504361	KRT8	12	53297987	S_Shore	Body	RDMR	TRUE		TRUE	0.00385953	0.402598	1.48217e-24	3.91387e-22
cg26160218		3	24538388	S_Shore			NA	Unclassified_Cell_type_specific	NA	0.00418845	0.272727	1.4969e-24	3.94977e-22
cg07704235		18	46501202	N_Shore		RDMR	NA		NA	0.00302459	0.794926	1.49877e-24	3.95171e-22
cg26837178	NODAL	10	72201611	S_Shore	TSS200	RDMR	TRUE		TRUE	0.00282198	0.276808	1.50378e-24	3.96193e-22
cg26381878	PRR5	22	45071340	OpenSea	5'UTR		NA		NA	0.00243354	0.357026	1.51316e-24	3.98364e-22
cg02645135		16	69516238	OpenSea			TRUE		TRUE	-0.00682717	0.705585	1.5211e-24	3.99881e-22
cg04588336	WNT11	11	75916460	N_Shore	Body		NA	Unclassified_Cell_type_specific	NA	0.00582806	0.350863	1.52121e-24	3.99881e-22
cg02185052	HHEX	10	94452480	S_Shore	Body	RDMR	NA		NA	0.00270738	0.0789567	1.52685e-24	4.01062e-22
cg20359445	IKZF4	12	56415591	OpenSea	Body		TRUE	Promoter_Associated	NA	0.00245516	0.192645	1.53968e-24	4.04128e-22
cg10686304		8	22561205	Island			TRUE		NA	0.00260962	0.128099	1.54764e-24	4.05914e-22
cg07429623	KLHDC8A	1	205326201	OpenSea	TSS200		NA		NA	0.00257947	0.197346	1.55112e-24	4.06519e-22
cg01205087		2	47008202	OpenSea			TRUE	Unclassified_Cell_type_specific	NA	0.0023211	0.145216	1.55698e-24	4.07749e-22
cg07495027	EDNRB	13	78492216	N_Shore	Body	CDMR	NA		NA	-0.00523357	0.662606	1.56217e-24	4.08802e-22
cg22110896	TBX4	17	59533081	Island	TSS1500	RDMR	NA	Unclassified_Cell_type_specific	NA	0.00513201	0.278724	1.56907e-24	4.10301e-22
cg09725286		8	134419335	OpenSea			TRUE	Unclassified	TRUE	-0.00360872	0.561378	1.57275e-24	4.10955e-22
cg21249091		2	173204540	OpenSea			TRUE		NA	0.00328344	0.170241	1.57513e-24	4.11259e-22
cg13080137	PRIM2	6	57288411	OpenSea	Body		TRUE		NA	0.00316294	0.649923	1.57627e-24	4.11259e-22
cg11482422	CUGBP2	10	11206813	N_Shore	TSS200	CDMR	NA	Promoter_Associated	TRUE	0.00502637	0.136805	1.58355e-24	4.12851e-22
cg15828524	CACNB3	12	49211029	N_Shore	TSS1500	RDMR	NA		NA	0.00320138	0.58972	1.60056e-24	4.16975e-22
cg07839457	NLRC5	16	57023022	N_Shore	TSS1500		TRUE	Promoter_Associated	NA	0.00322955	0.403436	1.62168e-24	4.22162e-22
cg14914924		2	203004395	OpenSea			TRUE		NA	0.0027885	0.718142	1.64653e-24	4.27997e-22
cg12178980	CUGBP2	10	11206870	N_Shore	TSS200	CDMR	NA	Promoter_Associated	TRUE	0.0064935	0.182221	1.64654e-24	4.27997e-22
cg19960891	MACROD1	11	63776653	S_Shore	Body		NA	Unclassified_Cell_type_specific	NA	0.00428451	0.194635	1.66375e-24	4.32149e-22
cg07159230	CASZ1	1	10731250	OpenSea	Body		NA	Unclassified_Cell_type_specific	NA	0.00613157	0.390499	1.66909e-24	4.33214e-22
cg10107783	SORL1	11	121474197	OpenSea	Body		TRUE		NA	-0.00429184	0.74102	1.67114e-24	4.33423e-22
cg06475902		6	19754272	OpenSea			TRUE		NA	0.00309088	0.362888	1.68955e-24	4.37571e-22
cg08336287	CUGBP2	10	11206892	N_Shore	TSS200	CDMR	NA	Promoter_Associated	TRUE	0.00445732	0.155446	1.68964e-24	4.37571e-22
cg16499469		3	170131019	OpenSea			NA	Unclassified_Cell_type_specific	NA	0.00278373	0.827849	1.69222e-24	4.37914e-22
cg21035402	LRFN3	19	36435543	Island	Body		NA		NA	0.00457147	0.763043	1.69851e-24	4.39217e-22
cg01459052	CCDC12	3	47016537	N_Shore	Body		NA		NA	-0.00227398	0.581826	1.72337e-24	4.45316e-22
cg25412310	APLP2	11	130014702	OpenSea	Body		TRUE		NA	0.00281194	0.293922	1.72746e-24	4.46043e-22
cg05226558	LRRC2	3	46617183	N_Shore	5'UTR		NA		NA	0.00331751	0.404328	1.73399e-24	4.47398e-22
cg13283765		2	200853063	OpenSea			TRUE		NA	0.00290851	0.141546	1.75097e-24	4.51446e-22
cg21920570	MACROD1	11	63766787	Island	Body		NA		NA	0.00226815	0.13469	1.76241e-24	4.54062e-22
cg06068085	FBN2	5	127871927	N_Shore	Body		NA		NA	0.00520325	0.163481	1.78e-24	4.58255e-22
cg03773731	NOTCH3	19	15310387	N_Shore	Body		NA		TRUE	0.00198731	0.454256	1.7838e-24	4.58418e-22
cg15516835	DIP2C	10	710082	N_Shore	Body		NA		NA	0.00346045	0.62874	1.7838e-24	4.58418e-22
cg19421125	LAG3	12	6882856	Island	Body		NA	Unclassified_Cell_type_specific	NA	0.00504393	0.198914	1.78457e-24	4.58418e-22
cg05099464	ARHGEF12	11	120302922	OpenSea	Body		TRUE		TRUE	-0.00469985	0.826813	1.80007e-24	4.62061e-22
cg26861732		20	21372126	Island			TRUE		NA	0.00276243	0.0753905	1.80236e-24	4.62308e-22
cg14588003		15	93361889	OpenSea		CDMR	TRUE		NA	0.00395412	0.672991	1.81332e-24	4.64778e-22
cg06004017	MN1	22	28191222	N_Shore	Body	RDMR	NA		NA	0.00325769	0.519929	1.84962e-24	4.73735e-22
cg19175123	FBXW4	10	103411746	OpenSea	Body		TRUE		NA	0.00194825	0.389014	1.854e-24	4.74509e-22
cg09887323	ACOT7	1	6348460	OpenSea	Body		NA		NA	-0.00332792	0.653931	1.87741e-24	4.80148e-22
cg03731303	SOX2OT	3	181443009	N_Shore	Body	CDMR	TRUE		NA	0.00683245	0.319457	1.89959e-24	4.85465e-22
cg09030187		1	205263738	OpenSea			TRUE		TRUE	0.00278768	0.421954	1.93551e-24	4.94284e-22
cg02679503	MTA3	2	42794680	N_Shore	TSS1500		TRUE		NA	0.00291427	0.298553	1.93883e-24	4.94771e-22
cg21167532	KIAA1522	1	33231272	OpenSea	Body		NA		NA	0.00392794	0.448517	1.94679e-24	4.96439e-22
cg06716730	DUSP14	17	35851459	S_Shore	5'UTR	RDMR	NA	Promoter_Associated	TRUE	0.00366262	0.262955	1.95673e-24	4.98609e-22
cg03904291	ABCG4	11	119019361	N_Shore	TSS1500		NA	Unclassified_Cell_type_specific	NA	0.00465272	0.318497	1.95852e-24	4.98701e-22
cg21616089	IGF2BP1	17	47089952	N_Shore	Body		TRUE		NA	0.00394469	0.17406	1.96273e-24	4.99411e-22
cg02294302	FOXD2	1	47906276	S_Shore	3'UTR	RDMR	NA		NA	0.00372943	0.276009	1.97266e-24	5.01463e-22
cg05573829		5	132175434	OpenSea			TRUE		NA	0.00220422	0.502554	1.97367e-24	5.01463e-22
cg10843343	KRT8	12	53298027	S_Shore	Body	RDMR	TRUE		TRUE	0.00407919	0.39676	1.98946e-24	5.05107e-22
cg26557756	GLI3	7	42278096	S_Shore	TSS1500		NA		NA	0.00399105	0.212159	2.0101e-24	5.09976e-22
cg06012804		3	193849318	N_Shelf			TRUE	Unclassified_Cell_type_specific	NA	0.00251612	0.157759	2.01382e-24	5.1055e-22
cg11476241	RPTOR	17	78866235	N_Shelf	Body		TRUE	Unclassified	NA	0.00358506	0.673713	2.02276e-24	5.12444e-22
cg09029902	ZNF217	20	52199594	S_Shore	5'UTR		NA		NA	-0.00479725	0.502902	2.03703e-24	5.15686e-22
cg00451642	MEGF11	15	66546935	S_Shore	TSS1500		NA	Unclassified_Cell_type_specific	NA	0.0055997	0.143403	2.04407e-24	5.16918e-22
cg16671238	CRYL1	13	20987145	N_Shore	Body		TRUE	Unclassified_Cell_type_specific	NA	0.00267703	0.484634	2.04485e-24	5.16918e-22
cg05855948		18	24234966	N_Shore		RDMR	NA		NA	0.00333177	0.141141	2.05191e-24	5.18327e-22
cg03108928	IPO13	1	44418720	OpenSea	Body		TRUE		NA	0.00453017	0.767412	2.08185e-24	5.2551e-22
cg00460983		10	91133941	OpenSea			TRUE		TRUE	-0.0042149	0.247376	2.08598e-24	5.26172e-22
cg19654743	2020-09-09	17	75446592	N_Shore	TSS200		NA		NA	0.00248994	0.256374	2.10266e-24	5.29997e-22
cg15656686	DDR1	6	30854551	S_Shore	5'UTR		TRUE		NA	0.00171004	0.150803	2.10671e-24	5.30634e-22
cg12762413	RHOU	1	228873420	S_Shore	Body		NA		NA	0.00276769	0.357664	2.10839e-24	5.30676e-22
cg02713832	CD6	11	60772559	N_Shelf	Body		NA	Promoter_Associated	NA	0.00440406	0.423743	2.11311e-24	5.3148e-22
cg14304515	FAM110A	20	822499	Island	5'UTR		NA	Unclassified	NA	0.00295782	0.207074	2.12796e-24	5.34831e-22
cg16696002	DNM3	1	172189728	OpenSea	Body		TRUE		NA	0.00336535	0.454796	2.1487e-24	5.39653e-22
cg11994229	FMNL2	2	153310258	OpenSea	Body		TRUE		NA	0.00319936	0.783395	2.15949e-24	5.41974e-22
cg15440661		2	43395871	N_Shelf			TRUE	Unclassified_Cell_type_specific	TRUE	0.00377171	0.505426	2.19155e-24	5.49626e-22
cg20196537		2	171574548	S_Shore			NA		NA	0.00717189	0.251296	2.19854e-24	5.50984e-22
cg10868156	RAI1	17	17713364	Island	3'UTR		NA	Unclassified_Cell_type_specific	TRUE	0.00562668	0.270648	2.20043e-24	5.51062e-22
cg12076823	RPS6KA4	11	64127791	S_Shore	Body		NA	Promoter_Associated	NA	0.00274576	0.476142	2.21419e-24	5.54112e-22
cg11043251	RUNX1T1	8	93108262	OpenSea	TSS1500		TRUE		NA	0.00291213	0.368951	2.24623e-24	5.61726e-22
cg17870997		2	121498521	N_Shore		RDMR	NA		NA	0.00370581	0.385517	2.26491e-24	5.65991e-22
cg25363807	ERI3	1	44703923	OpenSea	Body		NA	Unclassified	TRUE	0.00448823	0.126817	2.2975e-24	5.73726e-22
cg14284797	SARDH	9	136545056	OpenSea	Body		NA		NA	-0.00398005	0.794636	2.30047e-24	5.74058e-22
cg03918756	TRAPPC9	8	141248632	OpenSea	Body		TRUE		TRUE	0.00373497	0.670047	2.32845e-24	5.80625e-22
cg08618463	SMAD1	4	146467791	OpenSea	Body		TRUE		NA	-0.00571437	0.643981	2.33241e-24	5.81199e-22
cg05804170	PRDM16	1	3121514	OpenSea	Body		TRUE		NA	0.00470778	0.182478	2.34588e-24	5.84137e-22
cg09045552	LASS6	2	169506620	OpenSea	Body		TRUE		NA	0.00335246	0.835925	2.36044e-24	5.87345e-22
cg09395443	FOXK1	7	4746437	OpenSea	Body	RDMR	TRUE		NA	0.00239154	0.229217	2.36893e-24	5.89014e-22
cg01580228	MIR1304	11	93467095	OpenSea	TSS200		NA		NA	-0.00334618	0.833093	2.37052e-24	5.89014e-22
cg22502382	FGD4	12	32701732	OpenSea	5'UTR		TRUE		TRUE	-0.00422943	0.428301	2.4051e-24	5.9718e-22
cg21129729	KCNG3	2	42719678	N_Shore	Body	RDMR	NA		NA	0.00459437	0.350836	2.44381e-24	6.06363e-22
cg27152890	PPP1R13L	19	45900241	Island	Body		NA		NA	0.00608866	0.335043	2.45722e-24	6.09257e-22
cg12684668	GPX3	5	150403466	S_Shelf	Body		NA		TRUE	-0.00273471	0.825992	2.46383e-24	6.10461e-22
cg11097968		14	103012188	S_Shore			TRUE		TRUE	0.00274929	0.206532	2.49189e-24	6.16976e-22
cg05338397	C1orf126	1	15466556	OpenSea	Body		TRUE		NA	0.00338266	0.349145	2.52587e-24	6.24947e-22
cg11050612	WWTR1	3	149374066	N_Shore	Body		NA		NA	-0.00513408	0.251641	2.54376e-24	6.28928e-22
cg24382070	LGI3	8	22013694	N_Shore	Body		NA	Unclassified_Cell_type_specific	TRUE	0.00363928	0.104919	2.55386e-24	6.30977e-22
cg25607361		13	29230532	N_Shelf			NA		NA	-0.0045214	0.776394	2.55983e-24	6.32006e-22
cg07034563	PDLIM7	5	176919739	S_Shore	Body		TRUE	Unclassified	NA	-0.00383094	0.668105	2.58721e-24	6.38315e-22
cg10456121		2	177355281	Island			TRUE		NA	0.00282463	0.145673	2.60481e-24	6.42204e-22
cg17413194	GNA13	17	63053996	S_Shore	TSS1500		NA		NA	-0.0035182	0.659321	2.61321e-24	6.43821e-22
cg25673241	RPTOR	17	78694856	OpenSea	Body		NA	Unclassified_Cell_type_specific	NA	0.00288556	0.419794	2.68905e-24	6.62039e-22
cg07120544	RUNX1T1	8	93076082	OpenSea	Body		NA		NA	0.0023421	0.379802	2.71616e-24	6.68242e-22
cg17105139	LOC151534	2	74729279	N_Shore	TSS1500	RDMR	NA	Unclassified	NA	0.00408265	0.363821	2.75437e-24	6.77167e-22
cg18045195		2	45178950	N_Shore		RDMR	NA	Unclassified	TRUE	0.00508739	0.402931	2.78544e-24	6.84324e-22
cg06874403		10	21799047	Island			TRUE	Unclassified_Cell_type_specific	TRUE	0.00349446	0.365863	2.80486e-24	6.88223e-22
cg23837109	PLAU	10	75670435	N_Shore	TSS1500		NA	Promoter_Associated	TRUE	0.0048726	0.32185	2.80525e-24	6.88223e-22
cg17600231	TSC22D1	13	45008526	N_Shelf	3'UTR	CDMR	TRUE		NA	-0.0060403	0.590389	2.82725e-24	6.93133e-22
cg02584867	KLF16	19	1861099	N_Shore	Body	CDMR	NA	Promoter_Associated	TRUE	0.00426181	0.383114	2.83276e-24	6.93995e-22
cg07313162		5	34587700	OpenSea			TRUE		NA	0.00415869	0.27404	2.84454e-24	6.96244e-22
cg06930252	SBF1	22	50903229	Island	Body		NA	Gene_Associated_Cell_type_specific	NA	-0.00361448	0.839573	2.84592e-24	6.96244e-22
cg11323255	REEP6	19	1493168	S_Shore	Body		NA		NA	0.00294125	0.33308	2.84824e-24	6.96323e-22
cg08178072		2	45164495	N_Shore			NA		NA	0.00498978	0.281229	2.85665e-24	6.97893e-22
cg17842822		6	1310485	N_Shore		RDMR	NA		NA	0.00389067	0.427476	2.87632e-24	7.02206e-22
cg15478483		6	111936529	OpenSea			TRUE		NA	0.0034005	0.308078	2.88808e-24	7.04585e-22
cg02486855	SMAD3	15	67356942	N_Shore	TSS1500	RDMR	NA		TRUE	0.00417573	0.126379	2.89365e-24	7.05452e-22
cg26191313	LRRC27	10	134190018	OpenSea	3'UTR		NA		NA	0.00413617	0.55704	2.90793e-24	7.08437e-22
cg17580613	C7orf30	7	23338304	N_Shore	TSS1500		NA	Promoter_Associated	NA	-0.00578423	0.771278	2.94649e-24	7.17331e-22
cg16033723		3	31402883	OpenSea			TRUE		NA	0.0035073	0.218168	2.98826e-24	7.26993e-22
cg19496554		6	50081576	OpenSea			TRUE		NA	-0.00488593	0.810524	2.99619e-24	7.28415e-22
cg03375371	NFU1	2	69665094	S_Shore	TSS1500		NA	Promoter_Associated	NA	-0.00399693	0.758704	3.00707e-24	7.30273e-22
cg16293892		5	77142620	S_Shore			TRUE		NA	0.00505119	0.380334	3.00801e-24	7.30273e-22
cg09342417	STAM	10	17715813	OpenSea	Body		TRUE		TRUE	0.00411214	0.371382	3.03235e-24	7.35672e-22
cg24724664	MAP1D	2	172945383	Island	3'UTR	RDMR	TRUE		NA	0.00211595	0.098033	3.0427e-24	7.37669e-22
cg17142723	NBR1	17	41324085	S_Shore	5'UTR	RDMR	NA	Promoter_Associated	TRUE	-0.00405536	0.464207	3.04786e-24	7.38409e-22
cg26392737	EPB49	8	21916853	S_Shelf	1stExon		NA	Unclassified_Cell_type_specific	NA	0.00256448	0.414295	3.07291e-24	7.43962e-22
cg07434944		11	1991814	S_Shore			NA		NA	0.00320846	0.491271	3.08239e-24	7.45739e-22
cg13928485	VAV2	9	136726359	N_Shelf	Body		NA		NA	0.00271072	0.575377	3.10684e-24	7.51135e-22
cg08644463	GNAI3	1	110106962	OpenSea	Body		TRUE		NA	0.00298311	0.41239	3.14507e-24	7.59853e-22
cg12723985	PLXDC2	10	20255908	OpenSea	Body		TRUE		NA	0.00297477	0.426183	3.1724e-24	7.65896e-22
cg09440270	CYP26C1	10	94820086	Island	TSS1500		NA		NA	0.00296707	0.199306	3.17447e-24	7.65896e-22
cg00483030	CBX4	17	77810509	N_Shore	Body		NA		TRUE	0.00372383	0.309841	3.18382e-24	7.67621e-22
cg18556455		2	45178474	N_Shore		RDMR	NA	Unclassified	NA	0.0051684	0.462268	3.19664e-24	7.7018e-22
cg20263392	MEGF6	1	3462550	S_Shelf	Body		NA	Unclassified_Cell_type_specific	NA	0.00342272	0.315002	3.20162e-24	7.70849e-22
cg07402310	STAT5B	17	40424590	N_Shelf	5'UTR		NA	Unclassified_Cell_type_specific	NA	0.00523486	0.350181	3.23032e-24	7.76739e-22
cg04166294		16	54322984	Island		RDMR	NA		NA	0.00612374	0.349741	3.23053e-24	7.76739e-22
cg12127159		7	33809972	OpenSea			NA		NA	0.00244319	0.627561	3.23655e-24	7.7765e-22
cg12895760	SYTL3	6	159178966	OpenSea	Body		TRUE		NA	0.00298439	0.478264	3.29163e-24	7.90343e-22
cg20798740		8	37560840	S_Shore			TRUE		NA	0.00188616	0.103546	3.29629e-24	7.9044e-22
cg00796821	KCP	7	128551757	S_Shore	TSS1500		NA		NA	0.003095	0.102063	3.29656e-24	7.9044e-22
cg07420827	AGAP1	2	236996041	OpenSea	Body		TRUE	Unclassified_Cell_type_specific	NA	0.00329891	0.637166	3.31146e-24	7.93301e-22
cg04511619	ZNF423	16	49736354	S_Shelf	Body		NA		TRUE	0.00320069	0.270148	3.31304e-24	7.93301e-22
cg24637252	CT62	15	71402902	OpenSea	3'UTR		NA		NA	0.00278097	0.608926	3.3216e-24	7.94805e-22
cg03282295	CAP2	6	17418420	OpenSea	5'UTR		TRUE		TRUE	0.00312413	0.523359	3.34148e-24	7.98261e-22
cg10821320	KDM4B	19	5151204	N_Shore	Body		TRUE	Unclassified_Cell_type_specific	NA	0.00287857	0.472007	3.34195e-24	7.98261e-22
cg09127448	CTBP2	10	126704108	OpenSea	Body		NA		NA	-0.00363637	0.784934	3.34289e-24	7.98261e-22
cg02370923		2	106227122	OpenSea			NA		NA	0.00378131	0.215842	3.35822e-24	8.01373e-22
cg10046401		10	21797191	N_Shore		RDMR	NA		NA	0.00579953	0.769462	3.38081e-24	8.06214e-22
cg27596890	ZNF423	16	49621173	OpenSea	Body		TRUE	Unclassified_Cell_type_specific	NA	0.00301073	0.206112	3.39793e-24	8.09743e-22
cg25507845	CAMK2A	5	149635694	OpenSea	Body		TRUE		NA	0.00311376	0.249871	3.44825e-24	8.21174e-22
cg22967717		5	92695561	OpenSea			TRUE		TRUE	-0.00456651	0.193199	3.45832e-24	8.23011e-22
cg13812731	NRGN	11	124615143	N_Shore	Body		TRUE	Unclassified_Cell_type_specific	NA	0.00372508	0.467461	3.48529e-24	8.28865e-22
cg22761483		2	216489226	OpenSea			TRUE		NA	-0.00439405	0.24054	3.57906e-24	8.50587e-22
cg21828951	CUL1	7	148420058	OpenSea	5'UTR		TRUE	Promoter_Associated_Cell_type_specific	NA	-0.00376796	0.510915	3.5985e-24	8.54625e-22
cg05656812	DISC1	1	232021560	OpenSea	Body		TRUE		NA	0.00274239	0.751268	3.60181e-24	8.5483e-22
cg15631458		8	20160009	N_Shore		RDMR	TRUE	Unclassified_Cell_type_specific	NA	0.00370707	0.388096	3.60952e-24	8.5608e-22
cg12210836	AKAP7	6	131481003	OpenSea	Body		TRUE		NA	0.00482448	0.468484	3.61414e-24	8.56594e-22
cg01772149	PRDM16	1	3038216	Island	Body		NA		NA	0.00479229	0.477914	3.61995e-24	8.57388e-22
cg11966803	STK24	13	99158787	OpenSea	Body		NA		NA	0.0036277	0.525735	3.63423e-24	8.60186e-22
cg24361761	GPR158	10	25782377	OpenSea	Body		TRUE		NA	0.00319859	0.170125	3.64615e-24	8.61854e-22
cg10578938	CYFIP2	5	156695410	S_Shore	5'UTR		TRUE		NA	-0.00455345	0.630963	3.64621e-24	8.61854e-22
cg08451325		21	44720984	Island			NA	Unclassified_Cell_type_specific	NA	0.00343929	0.541759	3.6494e-24	8.62026e-22
cg20739013	EOMES	3	27761677	N_Shore	Body	RDMR	NA	Unclassified_Cell_type_specific	NA	0.00406895	0.246666	3.72131e-24	8.78417e-22
cg04308769	NR5A2	1	200007623	N_Shore	Body	RDMR	NA		TRUE	0.00392972	0.195684	3.74087e-24	8.82439e-22
cg11700868	GJD3	17	38521232	S_Shore	TSS1500		NA		NA	0.00399928	0.846044	3.74427e-24	8.82646e-22
cg26985149		17	40464935	Island			NA	Promoter_Associated	NA	0.0023212	0.250741	3.77187e-24	8.88552e-22
cg03388679	BMP7	20	55838478	N_Shore	Body	RDMR	NA		NA	0.00238415	0.485745	3.79312e-24	8.92956e-22
cg03364683	DDX60L	4	169402298	S_Shore	TSS1500	RDMR	NA	Promoter_Associated	TRUE	-0.00286649	0.688988	3.82247e-24	8.99258e-22
cg05389236		6	36635087	OpenSea			TRUE	Unclassified_Cell_type_specific	TRUE	0.00291403	0.522672	3.89789e-24	9.16385e-22
cg26109145	BAIAP2	17	79045877	S_Shore	Body		NA	Unclassified_Cell_type_specific	TRUE	-0.00537587	0.689426	3.92318e-24	9.21709e-22
cg07196426	TFAP2E	1	36042433	Island	Body	RDMR	NA		NA	0.00460261	0.34767	3.93141e-24	9.23023e-22
cg13648715	SCARB2	4	77133417	N_Shore	Body	RDMR	NA		NA	-0.00690428	0.394463	3.9376e-24	9.23855e-22
cg12089490		17	234536	Island			NA	Unclassified_Cell_type_specific	NA	0.00216553	0.122919	3.95797e-24	9.28011e-22
cg01026898	LOC221122	11	44995262	OpenSea	TSS200		NA		NA	0.00227902	0.358944	3.97239e-24	9.30766e-22
cg23513600	TNIK	3	171171401	OpenSea	Body		TRUE	Unclassified_Cell_type_specific	NA	0.00265567	0.338353	4.01125e-24	9.39244e-22
cg06507244	DHX32	10	127569494	OpenSea	5'UTR		TRUE		NA	0.00332317	0.404713	4.04006e-24	9.45354e-22
cg14617592	MED27	9	134909837	OpenSea	Body		TRUE		NA	0.00467072	0.847477	4.06239e-24	9.49945e-22
cg04625615	ITPKA	15	41788368	Island	Body		NA		NA	0.00444855	0.246005	4.09449e-24	9.56251e-22
cg02297838	MIR19A	13	92002454	S_Shore	TSS1500		NA		NA	0.00208157	0.099768	4.09483e-24	9.56251e-22
cg16269755	SNX27	1	151586058	S_Shore	Body		NA	Promoter_Associated_Cell_type_specific	NA	0.00255794	0.181611	4.10294e-24	9.57503e-22
cg09135441	GRIP1	12	67073760	OpenSea	TSS1500		NA		NA	-0.00427018	0.698404	4.13734e-24	9.64047e-22
cg16675054	STK10	5	171616574	S_Shore	TSS1500	RDMR	NA	Promoter_Associated	NA	0.00692197	0.389473	4.13881e-24	9.64047e-22
cg03231596	DLC1	8	12987546	N_Shore	Body		NA		NA	-0.00836902	0.217553	4.13926e-24	9.64047e-22
cg03935116	FAM60A	12	31476565	N_Shore	5'UTR	RDMR	NA		NA	0.0037028	0.434031	4.16072e-24	9.68399e-22
cg02181247	ADM	11	10325567	N_Shore	TSS1500		NA	Promoter_Associated	NA	0.00483563	0.399938	4.1878e-24	9.74054e-22
cg27306787	TXNRD2	22	19879176	OpenSea	Body	DMR	TRUE	Promoter_Associated	NA	0.00347852	0.148113	4.19186e-24	9.7435e-22
cg17590162	MACROD1	11	63827361	OpenSea	Body		NA	Unclassified_Cell_type_specific	NA	0.00344205	0.247367	4.22614e-24	9.81664e-22
cg16579908		14	77403711	OpenSea			TRUE		TRUE	0.00251724	0.114446	4.25119e-24	9.86828e-22
cg10414829	SNCG	10	88719259	OpenSea	Body		TRUE		TRUE	0.00275346	0.445691	4.28834e-24	9.9479e-22
cg17802486	FMN1	15	33179514	OpenSea	Body		TRUE		NA	-0.0048125	0.678692	4.33296e-24	1.00447e-21
cg17498867	CYP26B1	2	72371552	Island	Body	CDMR	NA		NA	0.00319042	0.29044	4.34141e-24	1.00576e-21
cg10512951	LMBRD1	6	70500634	OpenSea	Body		TRUE		NA	-0.00485854	0.742382	4.35384e-24	1.00798e-21
cg06936803	SORBS2	4	186559938	N_Shore	Body		NA		NA	0.00526537	0.466511	4.3577e-24	1.0082e-21
cg15142477	RNF165	18	43915662	S_Shore	Body	RDMR	NA		TRUE	0.00372701	0.178219	4.37102e-24	1.01061e-21
cg15153118	PDCD1	2	242798478	N_Shore	Body		NA		NA	0.00306789	0.573331	4.38539e-24	1.01326e-21
cg08327367	LRP4	11	46934663	OpenSea	Body		TRUE		NA	0.00400652	0.245512	4.40382e-24	1.01685e-21
cg08383160		2	17981519	OpenSea			NA		NA	0.00279574	0.34908	4.41068e-24	1.01776e-21
cg02927655	TM7SF3	12	27167667	S_Shore	TSS1500		NA	Promoter_Associated	NA	-0.00428094	0.122991	4.4305e-24	1.02166e-21
cg17517296		2	43107458	OpenSea			TRUE		NA	-0.00485334	0.288025	4.44495e-24	1.02432e-21
cg24079811	GLI3	7	42192041	OpenSea	Body		TRUE		NA	0.0029906	0.36646	4.45145e-24	1.02514e-21
cg02968301	C16orf89	16	5108664	OpenSea	Body		NA	Unclassified_Cell_type_specific	TRUE	0.00276082	0.426499	4.48388e-24	1.03193e-21
cg12230983	JARID2	6	15439701	OpenSea	Body		TRUE		NA	0.00398385	0.55425	4.58886e-24	1.05539e-21
cg23903708	DNMT3A	2	25527266	OpenSea	Body		TRUE		NA	0.00328951	0.839517	4.61512e-24	1.06007e-21
cg08433011	RUNX1	21	36399540	S_Shore	Body		TRUE	Promoter_Associated_Cell_type_specific	NA	0.00416566	0.496305	4.61527e-24	1.06007e-21
cg18052713	MSI2	17	55622595	OpenSea	Body		TRUE		NA	0.00342568	0.229616	4.67038e-24	1.07202e-21
cg11145302	INPP5A	10	134556533	S_Shore	Body		TRUE		TRUE	0.00664023	0.680976	4.68133e-24	1.07383e-21
cg04139895	GABRG3	15	27331340	OpenSea	Body		TRUE		NA	0.00390176	0.772487	4.68947e-24	1.07499e-21
cg20925383		13	50702410	N_Shore		RDMR	NA		NA	0.0059535	0.515365	4.72826e-24	1.08313e-21
cg07173218	SPSB1	1	9410333	OpenSea	5'UTR		TRUE		TRUE	0.00334524	0.813218	4.73114e-24	1.08313e-21
cg08154783		14	62302988	OpenSea			TRUE		NA	0.00423186	0.692305	4.75384e-24	1.08761e-21
cg03584056	UHRF1	19	4910798	S_Shore	5'UTR	RDMR	NA		NA	0.00201966	0.206399	4.80368e-24	1.09829e-21
cg20356637		15	67356310	N_Shore		RDMR	NA		NA	0.00372965	0.478496	4.80867e-24	1.09871e-21
cg07145988	RERE	1	8692312	OpenSea	Body		NA	Unclassified_Cell_type_specific	NA	0.00394066	0.519661	4.84951e-24	1.10678e-21
cg20463533		10	134705855	OpenSea			TRUE		NA	-0.00504074	0.754214	4.85032e-24	1.10678e-21
cg23090870	SPINT2	19	38755753	S_Shore	Body	RDMR	NA		TRUE	0.00324184	0.267975	4.89e-24	1.11477e-21
cg08764162	ZNF438	10	31147088	OpenSea	Body		TRUE		NA	-0.00467939	0.463577	4.89171e-24	1.11477e-21
cg13648127	MAMDC2	9	72665127	OpenSea	Body		TRUE		NA	-0.00298478	0.707382	4.89552e-24	1.11491e-21
cg18991240	NAGK	2	71298920	S_Shelf	Body		NA	Promoter_Associated	NA	-0.00415639	0.761416	4.94965e-24	1.1265e-21
cg23772928		15	57622224	S_Shelf			NA		NA	0.00317997	0.617357	4.97005e-24	1.13041e-21
cg09022808	GAL3ST1	22	30960857	OpenSea	5'UTR		NA		NA	0.00251843	0.261034	4.98147e-24	1.13227e-21
cg13657106	ARL15	5	53294048	OpenSea	Body		TRUE		NA	0.00494409	0.796242	4.99855e-24	1.13541e-21
cg21845633	TMEM88	17	7758204	N_Shore	TSS200		NA		NA	0.0046839	0.212862	5.02451e-24	1.14057e-21
cg18025838	SLC38A10	17	79232329	N_Shelf	Body		NA	Unclassified_Cell_type_specific	NA	0.00290162	0.507864	5.03809e-24	1.14291e-21
cg23032421	IL5RA	3	3152038	OpenSea	5'UTR		TRUE		NA	0.00329597	0.187028	5.05912e-24	1.14694e-21
cg23256802	VDAC1	5	133313281	OpenSea	Body		TRUE		NA	-0.00303066	0.863669	5.06649e-24	1.14786e-21
cg01357222		6	137619143	OpenSea			TRUE		NA	0.00278577	0.421425	5.09943e-24	1.15426e-21
cg09822812	DDR1	6	30855729	S_Shelf	TSS1500		TRUE		NA	-0.00376114	0.651034	5.10135e-24	1.15426e-21
cg11009695		10	29358074	OpenSea			TRUE		NA	0.00471959	0.611701	5.13472e-24	1.16106e-21
cg26546884	GMDS	6	1768004	OpenSea	Body		TRUE		NA	0.00384739	0.387499	5.15279e-24	1.16439e-21
cg24287175	RAI1	17	17713671	Island	3'UTR		NA		NA	0.00306299	0.237609	5.24006e-24	1.18335e-21
cg09140232		1	3530322	S_Shore			TRUE		TRUE	0.00281223	0.204831	5.27093e-24	1.18955e-21
cg19414967		8	49468296	N_Shore		RDMR	TRUE		NA	0.00375609	0.154783	5.30379e-24	1.1962e-21
cg23440155	CYP4B1	1	47264601	OpenSea	TSS200		NA		NA	-0.004914	0.641525	5.33272e-24	1.20194e-21
cg17327404	KIAA1522	1	33231109	OpenSea	Body		NA		NA	0.00301832	0.323375	5.38777e-24	1.21357e-21
cg10090386	LOXL2	8	23256732	N_Shelf	5'UTR		NA		NA	0.00323643	0.494851	5.45337e-24	1.2259e-21
cg20962974	LPCAT1	5	1515837	OpenSea	Body		TRUE		NA	0.00298042	0.252222	5.45585e-24	1.2259e-21
cg06829969	PGD	1	10460205	S_Shore	Body		NA	Promoter_Associated	NA	0.00405581	0.281174	5.45586e-24	1.2259e-21
cg06018514		15	41219741	Island		RDMR	NA		NA	0.00267764	0.377818	5.45655e-24	1.2259e-21
cg19780308	MAML3	4	140754450	OpenSea	Body		NA		NA	0.00324866	0.588841	5.48142e-24	1.2307e-21
cg21184369	HTRA4	8	38831148	N_Shore	TSS1500		NA		NA	0.00547794	0.303377	5.50056e-24	1.2342e-21
cg18404706	KLHL26	19	18761564	Island	Body	RDMR	TRUE		TRUE	0.00367049	0.186903	5.69177e-24	1.27628e-21
cg21252523		7	27254071	S_Shore			TRUE		NA	0.00349915	0.446399	5.7006e-24	1.27744e-21
cg18080604	AQP1	7	30951492	OpenSea	1stExon		NA		NA	-0.00347927	0.186455	5.7215e-24	1.28131e-21
cg00945810	HEATR2	7	814391	Island	Body		NA	Gene_Associated	TRUE	0.00325228	0.500758	5.72618e-24	1.28153e-21
cg05265020	NRN1	6	6002865	Island	Body	DMR	NA		NA	0.00260569	0.241955	5.77889e-24	1.2925e-21
cg18101488		14	100689613	OpenSea			TRUE		NA	0.0022773	0.389317	5.8242e-24	1.3018e-21
cg24776480	PRKCZ	1	2066446	Island	5'UTR		NA		NA	0.00223127	0.664338	5.82931e-24	1.30211e-21
cg15553500		4	41880987	N_Shore		RDMR	NA		NA	0.00359419	0.228517	5.85347e-24	1.30667e-21
cg06839417		3	149106151	OpenSea			TRUE		NA	-0.00278965	0.822538	5.85814e-24	1.30688e-21
cg06961354		1	48506255	OpenSea			TRUE		NA	0.00272387	0.41937	5.86506e-24	1.30759e-21
cg04956801		10	21798341	Island		RDMR	NA		NA	0.00544521	0.635255	5.88864e-24	1.31201e-21
cg11362010	SOX2OT	3	181442713	N_Shore	Body	CDMR	TRUE		NA	0.00495903	0.201057	5.92031e-24	1.31822e-21
cg19734752	ABCC3	17	48767857	OpenSea	Body		TRUE		NA	0.00282681	0.480472	5.93982e-24	1.32127e-21
cg00686132	MLLT4	6	168257835	OpenSea	Body		TRUE		NA	0.00392794	0.326127	5.94158e-24	1.32127e-21
cg10688516	NFIC	19	3369714	Island	Body		NA		NA	0.00365002	0.231666	5.9466e-24	1.32155e-21
cg01612883		12	125023115	N_Shore			TRUE	Unclassified_Cell_type_specific	NA	-0.00331743	0.692429	5.97085e-24	1.32609e-21
cg10108591	GPR157	1	9190516	S_Shore	TSS1500		NA		NA	-0.00428366	0.853271	6.00798e-24	1.33349e-21
cg21731304	NMNAT3	3	139346818	OpenSea	5'UTR		NA		NA	-0.00465459	0.704466	6.07107e-24	1.34664e-21
cg06035600	MAP3K6	1	27687454	Island	Body		NA		NA	0.00416015	0.41174	6.08016e-24	1.34727e-21
cg24222546	STRA6	15	74501771	OpenSea	TSS1500		TRUE		TRUE	0.0019573	0.0781442	6.08163e-24	1.34727e-21
cg26799250	PITPNM3	17	6358415	Island	3'UTR		NA		NA	0.00449645	0.274377	6.09312e-24	1.3487e-21
cg21927177	PLEKHG3	14	65172436	S_Shore	5'UTR	RDMR	NA	Promoter_Associated	NA	0.0018923	0.0871067	6.09578e-24	1.3487e-21
cg25387812		1	44554657	OpenSea			TRUE		NA	0.00249406	0.474797	6.14365e-24	1.35843e-21
cg09825327	TRAF5	1	211503219	S_Shelf	5'UTR		TRUE	Promoter_Associated_Cell_type_specific	NA	0.0027996	0.725604	6.15162e-24	1.35933e-21
cg17468569	NOS1AP	1	162041135	S_Shore	Body	RDMR	NA		NA	0.00350582	0.686308	6.23738e-24	1.37723e-21
cg01479664	TEPP	16	58016655	N_Shore	Body		NA		NA	0.004511	0.362536	6.244e-24	1.37723e-21
cg24318076	ALKBH5	17	18091662	S_Shelf	Body		NA		TRUE	-0.00476755	0.510758	6.24445e-24	1.37723e-21
cg07260789		12	125054411	S_Shelf			NA		NA	0.00335369	0.699235	6.25559e-24	1.37882e-21
cg20082096	CCDC124	19	18053266	OpenSea	Body		TRUE		NA	0.00417386	0.864895	6.26372e-24	1.37974e-21
cg02799090		10	130508166	N_Shore			NA		NA	0.00331904	0.47039	6.28251e-24	1.383e-21
cg27024654	PHF15	5	133904674	OpenSea	Body		TRUE		TRUE	-0.00536388	0.399301	6.28893e-24	1.38354e-21
cg24491784		15	96887824	Island		RDMR	TRUE	Unclassified	NA	0.00315268	0.54367	6.33701e-24	1.39324e-21
cg04335343	GABBR1	6	29597113	S_Shore	TSS1500		NA		NA	0.00197915	0.649776	6.36351e-24	1.39819e-21
cg03205764		15	39626450	OpenSea			TRUE		NA	0.00404391	0.716908	6.36877e-24	1.39847e-21
cg26328757	ELF3	1	201979764	OpenSea	5'UTR		NA		TRUE	0.00258397	0.508195	6.37514e-24	1.39899e-21
cg24374161	AMBRA1	11	46582058	OpenSea	5'UTR		NA	Promoter_Associated_Cell_type_specific	NA	-0.00467357	0.723824	6.42702e-24	1.40949e-21
cg15924868	C11orf21	11	2322674	OpenSea	Body		NA		NA	0.00509553	0.594853	6.58393e-24	1.44299e-21
cg08946601	NR2E1	6	108489064	Island	Body	RDMR	NA		NA	0.0032734	0.31786	6.81346e-24	1.49236e-21
cg04544267		7	115116310	OpenSea			TRUE		NA	0.00642755	0.559455	6.83238e-24	1.49557e-21
cg23943268	KL	13	33589621	N_Shore	TSS1500	RDMR	NA		NA	0.0062394	0.473149	6.87521e-24	1.504e-21
cg02902865	DHRS3	1	12679132	S_Shore	TSS1500		TRUE		TRUE	0.00303398	0.122897	6.89172e-24	1.50667e-21
cg04026948	PGCP	8	97953330	OpenSea	Body		TRUE		NA	-0.00630513	0.603246	6.92612e-24	1.51324e-21
cg15877233	C7orf10	7	40611688	OpenSea	Body		TRUE	Unclassified_Cell_type_specific	NA	0.00384621	0.312772	6.9617e-24	1.52006e-21
cg25116789		8	29732579	OpenSea			NA	Unclassified_Cell_type_specific	NA	0.00397493	0.3874	7.00424e-24	1.52775e-21
cg23249922		10	134231549	OpenSea			NA		NA	-0.00415439	0.716659	7.00563e-24	1.52775e-21
cg02228185	ASPA	17	3379567	OpenSea	1stExon		TRUE		NA	-0.00767925	0.45137	7.04044e-24	1.53438e-21
cg06430772	AGAP1	2	236443508	N_Shore	Body		TRUE		NA	0.00388771	0.376096	7.07014e-24	1.53989e-21
cg10692467	SEMA3B	3	50313021	Island	Body		TRUE	Unclassified_Cell_type_specific	NA	0.00746573	0.305585	7.08617e-24	1.54242e-21
cg23829949	ZNF238	1	244214679	S_Shore	1stExon		NA		NA	0.0026848	0.28304	7.13058e-24	1.55109e-21
cg10528218	UNC5C	4	96361328	OpenSea	Body		TRUE		NA	0.00235892	0.290543	7.13487e-24	1.55109e-21
cg05654164	C1orf52	1	85725892	S_Shore	TSS1500		NA	Promoter_Associated	NA	-0.00502385	0.1828	7.14732e-24	1.55283e-21
cg13915314	C21orf70	21	46387229	Island	Body		NA		NA	-0.00306231	0.85082	7.23397e-24	1.57068e-21
cg20309891	MEOX1	17	41739130	OpenSea	TSS200		TRUE		TRUE	0.0026033	0.397032	7.26565e-24	1.57658e-21
cg11977605	RNF212	4	1076247	OpenSea	Body		TRUE		TRUE	-0.0043586	0.418131	7.31453e-24	1.5862e-21
cg11177833	GLTPD2	17	4692377	Island	1stExon		NA		NA	0.00271478	0.168803	7.32602e-24	1.58676e-21
cg25007705	ECE1	1	21588799	OpenSea	Body		TRUE		TRUE	0.00320419	0.328713	7.32621e-24	1.58676e-21
cg09000832		13	50703589	N_Shore		RDMR	NA	Unclassified_Cell_type_specific	NA	0.00329048	0.198921	7.36691e-24	1.59459e-21
cg03460109	SORCS2	4	7427313	OpenSea	Body		NA		NA	0.00244023	0.510995	7.39859e-24	1.60045e-21
cg08078648		2	236236591	OpenSea			TRUE		NA	0.00255115	0.19314	7.4171e-24	1.60347e-21
cg12162450		2	45176551	N_Shore		RDMR	TRUE		NA	0.00368145	0.121548	7.43538e-24	1.60642e-21
cg18278519	DNTT	10	98069610	OpenSea	Body		TRUE		NA	0.0026248	0.306444	7.47858e-24	1.61476e-21
cg23167456	FGR	1	27942186	Island	Body		NA		NA	0.00480601	0.436193	7.55464e-24	1.63017e-21
cg03642503	TIMP2	17	76899257	S_Shore	Body		TRUE		TRUE	0.00229685	0.442507	7.56939e-24	1.63235e-21
cg03443331	KIAA1310	2	97302668	N_Shore	Body	RDMR	NA		NA	-0.00381441	0.529156	7.60399e-24	1.63801e-21
cg07084930	MTA1	14	105935351	N_Shore	Body		NA		NA	-0.00383017	0.426697	7.60501e-24	1.63801e-21
cg10273420	ZNF487	10	43953760	S_Shelf	Body		NA		NA	0.00365797	0.668567	7.61347e-24	1.63882e-21
cg07615364	DUSP7	3	52088726	N_Shore	Body		NA		NA	-0.00346025	0.740068	7.66384e-24	1.64865e-21
cg22702741	EXOC4	7	133706550	OpenSea	Body		TRUE		NA	0.00208131	0.443877	7.6835e-24	1.65154e-21
cg13154614	CCDC148	2	159040337	OpenSea	Body		TRUE		NA	-0.00251102	0.821521	7.68674e-24	1.65154e-21
cg00468395	XPO6	16	28193063	OpenSea	Body		TRUE		TRUE	-0.00491661	0.4231	7.75349e-24	1.66486e-21
cg15853812	KDM6B	17	7757994	N_Shore	3'UTR		NA		NA	0.00737171	0.683618	7.86237e-24	1.6872e-21
cg25224369		3	12918528	S_Shore			NA	Unclassified_Cell_type_specific	NA	0.00253554	0.647921	7.8716e-24	1.68801e-21
cg01763884	PLXNB2	22	50721626	Island	Body		TRUE		NA	-0.00263457	0.81563	7.87584e-24	1.68801e-21
cg01362115	MAP2K5	15	68075218	OpenSea	Body		TRUE		NA	0.00404704	0.657548	7.9131e-24	1.69496e-21
cg11631063		4	184679835	S_Shore			NA		NA	0.00254358	0.361967	7.96946e-24	1.70599e-21
cg07491858	ZCCHC24	10	81165685	OpenSea	Body		TRUE		NA	0.00298901	0.407384	8.05005e-24	1.72218e-21
cg17590003		17	25676574	Island			NA	Unclassified	TRUE	0.00438447	0.21188	8.06065e-24	1.7234e-21
cg22524061	OSR2	8	99959430	N_Shore	5'UTR	CDMR	TRUE	Unclassified_Cell_type_specific	NA	0.00765521	0.27104	8.11962e-24	1.73494e-21
cg27257822	EPHB3	3	184292880	S_Shore	Body		TRUE		NA	0.00238034	0.121338	8.13202e-24	1.73653e-21
cg10437842	EHD4	15	42213760	S_Shelf	Body		NA		NA	0.00366693	0.590937	8.15039e-24	1.73939e-21
cg12436377		5	87440296	S_Shelf			TRUE		NA	0.00521133	0.161178	8.15943e-24	1.74025e-21
cg02753354	HMHA1	19	1074727	Island	Body		NA	Promoter_Associated	TRUE	-0.0048787	0.630946	8.18212e-24	1.74334e-21
cg16567290	SLC26A10	12	58013569	Island	TSS200		TRUE		NA	0.00461608	0.320652	8.18389e-24	1.74334e-21
cg13130398	RABGAP1L	1	174844397	OpenSea	TSS1500		NA		NA	0.00442057	0.43979	8.22065e-24	1.75011e-21
cg12508856	KIF13B	8	28984472	OpenSea	Body		TRUE		NA	0.00539159	0.734334	8.24427e-24	1.75407e-21
cg25874150	PARD3	10	34941561	OpenSea	Body		TRUE		NA	0.00363105	0.363851	8.26249e-24	1.75687e-21
cg03857198		3	152927597	OpenSea			TRUE		NA	0.0026055	0.580138	8.30862e-24	1.76491e-21
cg16668359		2	45159434	N_Shore		RDMR	NA		NA	0.0067156	0.344833	8.31441e-24	1.76491e-21
cg16983159	TMEM173	5	138862441	OpenSea	TSS200		NA	Promoter_Associated	NA	-0.00396454	0.202589	8.31544e-24	1.76491e-21
cg18240463	PRDM16	1	3164415	Island	Body	DMR	TRUE		NA	0.00446002	0.165239	8.46145e-24	1.79481e-21
cg15974673	EVI5L	19	7926970	Island	Body	DMR	TRUE		NA	0.0058176	0.272136	8.66455e-24	1.83677e-21
cg00090764	MORN1	1	2259065	Island	Body		NA		NA	0.00280862	0.611848	8.72396e-24	1.84797e-21
cg25485392		19	3358039	N_Shore		CDMR	NA		NA	0.00269991	0.28037	8.72795e-24	1.84797e-21
cg01305981	FBXL21	5	135266673	S_Shore	5'UTR		TRUE		NA	0.00306765	0.160949	8.78548e-24	1.85902e-21
cg06637618	ATP2B4	1	203595048	N_Shelf	TSS1500		NA	Promoter_Associated	NA	-0.00265203	0.179604	8.82648e-24	1.86657e-21
cg12483545	SKI	1	2198879	OpenSea	Body		NA		NA	-0.0046275	0.691225	8.84869e-24	1.87014e-21
cg10955164		22	39919237	S_Shelf		RDMR	NA	Promoter_Associated_Cell_type_specific	TRUE	-0.00348153	0.590953	9.33289e-24	1.97098e-21
cg06829681	TEAD1	11	12867453	OpenSea	Body		TRUE		NA	0.00316346	0.241991	9.33712e-24	1.97098e-21
cg04840051	RBM20	10	112582591	OpenSea	Body		TRUE		NA	0.00212464	0.23818	9.3647e-24	1.97561e-21
cg09906382	NR4A2	2	157184416	Island	Body		NA		NA	0.00353494	0.678083	9.3985e-24	1.98154e-21
cg05306773	FUT3	19	5851616	OpenSea	TSS200		NA		NA	-0.00412	0.761491	9.43869e-24	1.98881e-21
cg00498211	SLC1A4	2	65217568	S_Shore	Body		NA	Promoter_Associated	NA	0.00412834	0.253014	9.55538e-24	2.01219e-21
cg14712657		7	93888413	OpenSea			TRUE		NA	0.0023985	0.198192	9.64113e-24	2.02902e-21
cg19400601	FXYD2	11	117691210	OpenSea	3'UTR		NA	Unclassified_Cell_type_specific	NA	0.00344194	0.838165	9.65046e-24	2.02976e-21
cg09237846	CHST11	12	105114399	OpenSea	Body		NA	Promoter_Associated_Cell_type_specific	NA	0.00289238	0.414682	9.67552e-24	2.03381e-21
cg17818731		2	43295753	S_Shore			TRUE		NA	0.00266007	0.833862	9.75559e-24	2.04941e-21
cg00504410	MGRN1	16	4732262	Island	Body		NA		NA	0.00245636	0.492893	9.83576e-24	2.06501e-21
cg18244708	BLCAP	20	36152923	S_Shore	5'UTR		NA		TRUE	0.00238702	0.634223	9.86843e-24	2.07062e-21
cg10869531	SH3BP2	4	2808489	OpenSea	5'UTR		TRUE		NA	-0.00361214	0.681901	9.90675e-24	2.07741e-21
cg09940355		15	62929234	OpenSea			TRUE		NA	0.00544932	0.44259	9.91946e-24	2.07883e-21
cg13171679		8	41258634	OpenSea			TRUE		NA	-0.00426567	0.551231	9.93228e-24	2.07915e-21
cg07106625		6	11870215	OpenSea			TRUE		NA	-0.00461485	0.186515	9.93288e-24	2.07915e-21
cg05285917	MUC2	11	1073525	OpenSea	TSS1500		TRUE		TRUE	-0.00274651	0.0913834	9.97207e-24	2.0861e-21
cg09354317	MUSTN1	3	52869307	OpenSea	TSS200		TRUE		NA	0.00206517	0.30457	1.00945e-23	2.11044e-21
cg15043318		5	170947897	OpenSea			TRUE		TRUE	0.00341287	0.248209	1.01038e-23	2.11114e-21
cg23528037	TMEM88	17	7758581	N_Shore	1stExon	RDMR	NA		NA	0.00283943	0.39735	1.02187e-23	2.13387e-21
cg05045981		7	129418470	Island		DMR	NA		NA	0.00223579	0.0997618	1.02375e-23	2.13651e-21
cg20307896		12	114883063	S_Shore			NA		NA	0.00319179	0.108183	1.03642e-23	2.16166e-21
cg17918556	LASS6	2	169372300	OpenSea	Body		TRUE		NA	-0.00458483	0.62027	1.03992e-23	2.16747e-21
cg03148457	PDZRN3	3	73670763	N_Shelf	Body	RDMR	NA		NA	0.0027076	0.125603	1.04045e-23	2.16747e-21
cg02186409	FLT1	13	28931547	OpenSea	Body		TRUE		NA	0.00250149	0.350315	1.04384e-23	2.17326e-21
cg10062874	TTC7B	14	91171058	OpenSea	Body		TRUE		NA	0.00315068	0.355831	1.07292e-23	2.23246e-21
cg10680621		5	139069449	OpenSea		DMR	TRUE	Unclassified	TRUE	0.00392677	0.30697	1.07551e-23	2.23652e-21
cg14844953		1	19339051	OpenSea			NA	Unclassified_Cell_type_specific	NA	0.00195439	0.331395	1.07695e-23	2.23818e-21
cg06213327	SORBS2	4	186560350	Island	Body		NA		NA	0.00326374	0.292917	1.08291e-23	2.24924e-21
cg11027217	ALPK1	4	113300650	Island	Body	RDMR	TRUE		NA	0.00355201	0.250018	1.08907e-23	2.26068e-21
cg02001779	SP100	2	231281264	OpenSea	Body		NA		NA	-0.00372744	0.0859599	1.09254e-23	2.26523e-21
cg20076659	NRXN3	14	79760047	OpenSea	Body		TRUE		NA	0.00289295	0.26023	1.09256e-23	2.26523e-21
cg03717442	SIX3	2	45172201	S_Shore	3'UTR	RDMR	NA		NA	0.00500974	0.253283	1.09623e-23	2.2715e-21
cg04700292	ZFHX3	16	73090723	N_Shore	5'UTR	RDMR	NA		NA	0.00695599	0.39911	1.104e-23	2.28623e-21
cg02074930	PGF	14	75423089	S_Shore	TSS1500		NA		NA	0.0036442	0.719169	1.10681e-23	2.2907e-21
cg23322546		2	177040094	S_Shore		RDMR	NA		NA	0.00462891	0.572456	1.11035e-23	2.29609e-21
cg03122532	KCNJ15	21	39644216	OpenSea	5'UTR		TRUE		NA	-0.00396812	0.504796	1.11073e-23	2.29609e-21
cg02487331		1	146550467	Island			NA		NA	0.00626006	0.277112	1.11839e-23	2.31057e-21
cg08151442	LRRFIP1	2	238632428	OpenSea	Body		TRUE	Gene_Associated_Cell_type_specific	TRUE	0.00334901	0.42071	1.1321e-23	2.3375e-21
cg09357761	PRKCH	14	61933059	OpenSea	Body		TRUE		TRUE	0.00337071	0.389824	1.133e-23	2.33798e-21
cg10977667		16	31053799	Island			TRUE		NA	0.00284811	0.179869	1.13942e-23	2.34984e-21
cg07717588	SH3BP4	2	235907647	OpenSea	5'UTR		NA		NA	0.00281505	0.301645	1.14298e-23	2.35579e-21
cg06635946		22	46470016	S_Shore		RDMR	NA		NA	-0.0070764	0.200248	1.14378e-23	2.35605e-21
cg10120652		8	9182252	OpenSea			NA		NA	-0.00375732	0.631218	1.14786e-23	2.36305e-21
cg14818812		8	142362180	OpenSea			TRUE		TRUE	0.00341339	0.277365	1.16011e-23	2.38687e-21
cg15821562	FOXN3	14	90083275	N_Shelf	5'UTR		NA	Promoter_Associated_Cell_type_specific	NA	0.00342705	0.464793	1.16688e-23	2.39939e-21
cg18941818	NR4A2	2	157184553	Island	Body		NA	Unclassified_Cell_type_specific	NA	0.00485519	0.449439	1.16791e-23	2.4001e-21
cg00864666	RAPGEF4	2	173850250	OpenSea	Body		TRUE		NA	-0.00337714	0.828446	1.16882e-23	2.40054e-21
cg19064711		6	27857051	N_Shore			NA		NA	0.00376497	0.800282	1.17575e-23	2.41109e-21
cg03471150	IPO9	1	201797198	N_Shore	TSS1500		NA		NA	-0.00314151	0.687396	1.1761e-23	2.41109e-21
cg24453118	LRCH1	13	47229927	OpenSea	Body		TRUE		NA	-0.00528078	0.173812	1.17667e-23	2.41109e-21
cg12097883	LOC146880	17	62774939	Island	Body	DMR	NA	Unclassified_Cell_type_specific	NA	0.00463263	0.315511	1.17743e-23	2.41109e-21
cg06148264	SERPINB1	6	2841468	N_Shore	5'UTR		TRUE	Promoter_Associated_Cell_type_specific	TRUE	0.00308482	0.290762	1.17756e-23	2.41109e-21
cg07151117	DUSP4	8	29204954	N_Shore	Body	RDMR	NA	Unclassified	NA	0.00283103	0.450917	1.17809e-23	2.41109e-21
cg00149537	SPSB1	1	9409810	OpenSea	5'UTR		NA		NA	0.00278618	0.580363	1.1799e-23	2.41338e-21
cg01057635		1	46914672	S_Shore			NA	Unclassified_Cell_type_specific	NA	0.00379337	0.580538	1.184e-23	2.42033e-21
cg01220257	BCL3	19	45260935	Island	Body	RDMR	TRUE		NA	0.00302946	0.216899	1.18665e-23	2.42433e-21
cg01790646	HDAC4	2	240321229	N_Shore	5'UTR		NA		NA	0.00291107	0.138679	1.18888e-23	2.42749e-21
cg07713849	ITPR3	6	33624841	OpenSea	Body		TRUE		NA	0.00322068	0.690485	1.19345e-23	2.43539e-21
cg17828445	2020-03-09	12	58150842	S_Shore	Body		NA	Promoter_Associated	TRUE	0.00216173	0.250522	1.19834e-23	2.44393e-21
cg15334372		16	73096889	Island		RDMR	NA		NA	0.00541338	0.171653	1.21098e-23	2.46828e-21
cg00186909	PLEKHG7	12	93129288	OpenSea	TSS1500		TRUE		NA	-0.0035307	0.155696	1.22047e-23	2.48617e-21
cg07262247	PDLIM4	5	131593730	Island	Body		NA		TRUE	0.00471039	0.303713	1.22964e-23	2.50267e-21
cg17714799	CASP6	4	110625080	S_Shore	TSS1500		NA		NA	-0.00512418	0.233054	1.23001e-23	2.50267e-21
cg06818377	LYN	8	56793504	S_Shore	5'UTR		NA		NA	0.00500071	0.372126	1.23992e-23	2.52137e-21
cg27059228		15	89545813	OpenSea			TRUE		TRUE	0.00342185	0.314901	1.2441e-23	2.52804e-21
cg25035939	KIF26B	1	245674287	OpenSea	Body		TRUE		NA	0.00365602	0.787106	1.24464e-23	2.52804e-21
cg12789279		7	140339594	N_Shore		RDMR	NA	Unclassified_Cell_type_specific	TRUE	0.00233476	0.186106	1.25616e-23	2.54995e-21
cg00339740		2	144664540	OpenSea			TRUE		NA	0.00398184	0.671778	1.27008e-23	2.5767e-21
cg09773897	NFIC	19	3364892	N_Shore	Body	RDMR	NA		NA	0.00491017	0.464766	1.28678e-23	2.60847e-21
cg05881068	EBF3	10	131660591	OpenSea	Body		NA		NA	-0.00299109	0.871765	1.28723e-23	2.60847e-21
cg06104975	PGP	16	2262804	N_Shore	3'UTR		TRUE		TRUE	-0.00367399	0.562434	1.29681e-23	2.62636e-21
cg02228492	HS3ST3B1	17	14224797	OpenSea	Body		TRUE		NA	0.00214578	0.213714	1.30616e-23	2.64377e-21
cg02003272		13	50702719	N_Shore		CDMR	NA		NA	0.00441379	0.525718	1.3105e-23	2.65101e-21
cg09581049		17	42998320	OpenSea			TRUE	Unclassified	NA	0.00219909	0.263796	1.31453e-23	2.65763e-21
cg07171504	KLF10	8	103662317	N_Shelf	3'UTR		NA		NA	-0.00196136	0.777482	1.32734e-23	2.68197e-21
cg27111756	PPP1R13L	19	45899412	Island	Body		NA		NA	0.00362805	0.479293	1.33926e-23	2.7045e-21
cg27542729		1	177850564	OpenSea			TRUE		NA	0.00315027	0.235406	1.34393e-23	2.71235e-21
cg18109369	ARHGEF3	3	57051243	OpenSea	Body		TRUE		NA	0.00241887	0.137921	1.34684e-23	2.71666e-21
cg10291238	XPO4	13	21423447	OpenSea	Body		TRUE		NA	0.00358153	0.202666	1.34913e-23	2.71867e-21
cg05223210	DSCAML1	11	117630397	OpenSea	Body		TRUE		NA	0.00250416	0.286315	1.34939e-23	2.71867e-21
cg10307052	DHRS7B	17	21065542	OpenSea	Body		TRUE		NA	-0.00575964	0.394614	1.363e-23	2.7445e-21
cg02125365		5	78813058	S_Shelf			NA	Unclassified_Cell_type_specific	NA	0.00271861	0.3739	1.36567e-23	2.74829e-21
cg04093149	SLC6A9	1	44497595	S_Shore	TSS1500		NA		NA	0.00191668	0.144764	1.36917e-23	2.75376e-21
cg10615765		5	42991657	N_Shore			NA	Promoter_Associated	NA	0.00392647	0.310565	1.37589e-23	2.76567e-21
cg00815177	NIPAL3	1	24791193	OpenSea	Body		TRUE		NA	0.00297837	0.530103	1.38602e-23	2.78294e-21
cg00994323	PPP1R16A	8	145721560	N_Shelf	TSS1500		NA		TRUE	0.00281109	0.764682	1.38607e-23	2.78294e-21
cg25070373		2	200966980	OpenSea			TRUE		NA	0.0024515	0.343337	1.38702e-23	2.78324e-21
cg04599612	SLC2A7	1	9086585	OpenSea	TSS200		NA		NA	0.00253797	0.624557	1.40637e-23	2.82044e-21
cg21254939	SORCS2	4	7657303	OpenSea	Body		NA		NA	0.00294158	0.335973	1.41204e-23	2.8302e-21
cg10161008	MACROD1	11	63766546	Island	Body		NA		NA	0.00317852	0.680386	1.41378e-23	2.83206e-21
cg02272993		2	45159972	Island		RDMR	NA		NA	0.00430618	0.229537	1.42992e-23	2.86275e-21
cg08712336	SLIT3	5	168464351	OpenSea	Body		TRUE		NA	0.00399721	0.694278	1.4348e-23	2.87087e-21
cg13836518	CORO2A	9	100883593	S_Shore	3'UTR		NA	Unclassified	NA	-0.0065115	0.45049	1.4538e-23	2.90724e-21
cg15889847	PLEKHG3	14	65183532	OpenSea	5'UTR		TRUE		NA	0.00286689	0.390077	1.4585e-23	2.91496e-21
cg10055593	GLI3	7	42265817	N_Shore	5'UTR		NA		NA	0.00432362	0.57849	1.46954e-23	2.93535e-21
cg08080060	EGLN2	19	41307090	Island	1stExon		NA		NA	-0.00267215	0.821138	1.47084e-23	2.93594e-21
cg23401684	YWHAQ	2	9772068	S_Shore	TSS1500	RDMR	NA		NA	0.00460501	0.64493	1.47206e-23	2.93594e-21
cg26483505	CREB5	7	28787270	OpenSea	Body		TRUE		NA	0.00337796	0.640412	1.47236e-23	2.93594e-21
cg05540133	CBFA2T3	16	88984237	OpenSea	5'UTR		NA		NA	0.00524236	0.813203	1.4811e-23	2.95113e-21
cg14741228	FAM60A	12	31476479	N_Shore	5'UTR	RDMR	NA		NA	0.00397111	0.315538	1.48167e-23	2.95113e-21
cg17782713	BMI1	10	22613360	N_Shore	5'UTR	RDMR	NA	Promoter_Associated	NA	0.00674521	0.688943	1.48571e-23	2.95749e-21
cg22122862	PRDM16	1	2987914	Island	Body		NA		NA	0.00464586	0.279794	1.51666e-23	3.01738e-21
cg22124648	FGR	1	27941866	Island	Body		NA		NA	0.00241031	0.224213	1.52972e-23	3.04164e-21
cg00319334	CD81	11	2397523	N_Shore	TSS1500		NA		NA	-0.00364448	0.858931	1.54651e-23	3.07326e-21
cg16417374	MAN1C1	1	26098310	S_Shore	Body		NA	Unclassified_Cell_type_specific	NA	0.00481232	0.668057	1.55453e-23	3.08746e-21
cg03400139	NAV1	1	201619900	S_Shore	Body		NA		NA	0.00375378	0.292996	1.56249e-23	3.10149e-21
cg04434909	CCDC85C	14	99988546	OpenSea	Body		NA		NA	0.00466773	0.834356	1.58892e-23	3.15186e-21
cg13113525	ISLR2	15	74427234	Island	Body	RDMR	NA	Unclassified	NA	0.00194377	0.064971	1.58967e-23	3.15186e-21
cg17443080	EGFL7	9	139557460	N_Shelf	5'UTR		NA		NA	0.0032475	0.638847	1.62244e-23	3.21502e-21
cg00411697	APOA5	11	116663321	S_Shore	TSS200		NA		NA	0.00170981	0.410132	1.6464e-23	3.26064e-21
cg00223245		3	64307530	OpenSea			TRUE		TRUE	0.00351354	0.346505	1.65444e-23	3.2747e-21
cg13676763	FAM125B	9	129262204	S_Shore	Body		NA	Unclassified	NA	0.00341601	0.226553	1.67055e-23	3.30474e-21
cg17799287	MIR19A	13	92001764	S_Shore	TSS1500		NA	Promoter_Associated	NA	0.00194605	0.0615132	1.67539e-23	3.31243e-21
cg18695263	LRRC33	3	196387505	Island	Body		NA		NA	-0.00403519	0.736735	1.67636e-23	3.31247e-21
cg20482274	SRC	20	35971659	N_Shelf	TSS1500		NA		NA	0.00263473	0.792685	1.68688e-23	3.33137e-21
cg01813071	MMP7	11	102401616	OpenSea	TSS200		NA		NA	-0.00533985	0.499498	1.69283e-23	3.34123e-21
cg06572093		14	69095231	Island			NA	Unclassified_Cell_type_specific	NA	0.00444852	0.26149	1.69654e-23	3.34666e-21
cg26751828	RIN3	14	93154758	Island	3'UTR		NA		NA	0.00432706	0.435296	1.6998e-23	3.35121e-21
cg15348839		2	232224846	OpenSea			TRUE		NA	0.00273087	0.752855	1.70336e-23	3.35632e-21
cg06324719		15	70118762	OpenSea			TRUE		NA	0.00237047	0.600576	1.71869e-23	3.38462e-21
cg12481170		5	61337620	OpenSea			TRUE		NA	0.00363868	0.293648	1.72388e-23	3.39293e-21
cg01847344	C21orf29	21	45929576	S_Shelf	Body	CDMR	NA	Unclassified	TRUE	-0.00250088	0.775144	1.734e-23	3.4081e-21
cg02152631		8	29133647	OpenSea			TRUE		TRUE	0.0032838	0.259565	1.73565e-23	3.4081e-21
cg21218687	KIF21B	1	200993311	S_Shore	TSS1500		NA		NA	0.00367736	0.782146	1.73576e-23	3.4081e-21
cg13912573	LOC100129066	9	92293297	S_Shore	Body		TRUE		TRUE	0.00208588	0.166902	1.73622e-23	3.4081e-21
cg15102179		11	2965028	N_Shore			NA	Unclassified_Cell_type_specific	NA	-0.00240612	0.745422	1.73646e-23	3.4081e-21
cg01783662	SOX2OT	3	181442676	N_Shore	Body	CDMR	TRUE		NA	0.00505553	0.191688	1.74815e-23	3.4291e-21
cg08090621		1	40162374	S_Shelf			NA		NA	0.00356903	0.329662	1.75617e-23	3.44291e-21
cg03427577		2	61809639	OpenSea			TRUE		NA	0.00406377	0.834332	1.75944e-23	3.44739e-21
cg17427675		5	43045555	S_Shelf		RDMR	NA		NA	0.00383054	0.36345	1.76098e-23	3.44847e-21
cg02397064	2020-09-09	17	75462916	OpenSea	Body		TRUE		NA	0.00277066	0.499122	1.78778e-23	3.499e-21
cg11234637	CYP26C1	10	94820945	Island	TSS200		NA	Unclassified_Cell_type_specific	NA	0.00335333	0.480597	1.7977e-23	3.51644e-21
cg27651238		12	52644264	Island			NA		NA	0.0095253	0.316374	1.80821e-23	3.53501e-21
cg05757907	REXO2	11	114312777	S_Shelf	Body		NA		NA	0.00269993	0.78044	1.81359e-23	3.54355e-21
cg13787135	RNASE1	14	21270407	OpenSea	5'UTR		NA		NA	-0.00300449	0.502399	1.83615e-23	3.58562e-21
cg00017826		2	30644955	OpenSea			TRUE	Unclassified_Cell_type_specific	NA	0.00384174	0.297287	1.84626e-23	3.60336e-21
cg25350986	FOXK1	7	4762844	N_Shore	Body		NA		NA	-0.00258388	0.904318	1.90169e-23	3.70946e-21
cg12267069		1	156407809	S_Shore		CDMR	NA	Unclassified_Cell_type_specific	NA	0.0024349	0.139069	1.90388e-23	3.71023e-21
cg11018604		5	71507163	OpenSea			TRUE		NA	-0.00535909	0.639445	1.90457e-23	3.71023e-21
cg24525364		1	35730504	N_Shelf			NA		NA	-0.00389504	0.29758	1.90527e-23	3.71023e-21
cg10380328		4	188953126	OpenSea			NA		NA	0.00679881	0.423623	1.90688e-23	3.71129e-21
cg17499941	LOC645323	5	87975812	N_Shore	Body		NA	Unclassified	NA	0.0029185	0.169132	1.91197e-23	3.71914e-21
cg08734090	C10orf105	10	73479514	OpenSea	1stExon		TRUE		NA	0.00255064	0.509308	1.92309e-23	3.73868e-21
cg00326842		2	43189943	OpenSea			TRUE	Unclassified_Cell_type_specific	NA	0.00210771	0.0998947	1.92919e-23	3.74845e-21
cg17330048	RASGRF2	5	80257322	S_Shore	Body		NA		NA	0.00441573	0.276809	1.93203e-23	3.75167e-21
cg24517501	GFI1	1	92952702	S_Shore	TSS1500	RDMR	NA		NA	0.00360408	0.42642	1.93299e-23	3.75167e-21
cg09818632		16	85543209	OpenSea			NA		NA	0.00238581	0.87374	1.944e-23	3.77095e-21
cg13600201		9	140193934	N_Shore		RDMR	NA		NA	0.00293448	0.363924	1.94657e-23	3.77382e-21
cg13126638	SCNN1A	12	6487080	OpenSea	TSS1500		NA		NA	-0.00370954	0.770569	1.95858e-23	3.79501e-21
cg13037081	RPS6KA4	11	64135875	Island	Body		NA		NA	0.00409834	0.56265	1.96415e-23	3.80369e-21
cg02659581	MEGF6	1	3467842	OpenSea	Body		NA	Unclassified_Cell_type_specific	NA	0.00294368	0.698241	1.96971e-23	3.81079e-21
cg10888644	POLS	5	6755790	S_Shore	3'UTR		NA		NA	-0.00311568	0.780901	1.97e-23	3.81079e-21
cg05888037	C13orf26	13	31506270	OpenSea	TSS1500		NA		NA	0.00249025	0.539373	1.98185e-23	3.83159e-21
cg17302455	ABCA5	17	67319224	N_Shelf	5'UTR		NA		NA	0.00581002	0.6476	1.98527e-23	3.83609e-21
cg10316141		15	99068324	OpenSea			TRUE		NA	0.00238995	0.414168	1.99932e-23	3.8611e-21
cg20570611	NR4A2	2	157184499	Island	Body		NA		NA	0.00341604	0.382049	2.0113e-23	3.88194e-21
cg25995980	GPRIN2	10	46993515	S_Shore	TSS200		NA	Unclassified_Cell_type_specific	TRUE	0.00160948	0.0912494	2.01234e-23	3.88194e-21
cg04365568		19	45809373	S_Shelf		CDMR	TRUE		NA	-0.00502393	0.447898	2.01876e-23	3.89219e-21
cg14037769		1	9895799	OpenSea			TRUE		TRUE	0.00247599	0.20229	2.03696e-23	3.92511e-21
cg15961693		6	139689053	OpenSea			TRUE		NA	0.00354487	0.429118	2.04991e-23	3.94662e-21
cg06357305	PTGIS	20	48183673	N_Shore	Body		NA		NA	0.00587617	0.240403	2.05038e-23	3.94662e-21
cg11375458		2	177003996	N_Shore			NA	Unclassified_Cell_type_specific	NA	0.00313861	0.162202	2.05566e-23	3.9546e-21
cg00015639	NRL	14	24554539	S_Shelf	TSS1500		NA		NA	0.00232004	0.762818	2.08514e-23	4.0091e-21
cg20791007	CA14	1	150229443	OpenSea	TSS1500		TRUE		NA	0.0026443	0.342489	2.08907e-23	4.01446e-21
cg06230839		21	43189892	S_Shelf			NA		NA	0.00328139	0.402223	2.09078e-23	4.01552e-21
cg17783086	LOC146880	17	62775188	Island	Body		NA	Unclassified_Cell_type_specific	NA	0.00310218	0.189633	2.09695e-23	4.02516e-21
cg05463027	KIF13A	6	17988748	S_Shore	TSS1500		NA		NA	-0.00370467	0.301001	2.11922e-23	4.06569e-21
cg20665157	CADPS2	7	121969421	OpenSea	Body		TRUE		NA	0.00302501	0.564508	2.13539e-23	4.09445e-21
cg15962744	RBM19	12	114328074	OpenSea	Body		TRUE		NA	0.00231931	0.339066	2.16025e-23	4.13986e-21
cg24441127	MR1	1	181002976	OpenSea	TSS200		TRUE	Promoter_Associated	TRUE	-0.00493638	0.679388	2.1628e-23	4.14247e-21
cg20186588		3	193545238	OpenSea			TRUE		NA	0.00323867	0.442948	2.1702e-23	4.15436e-21
cg05206840		5	38695848	OpenSea			TRUE		NA	0.00049787	0.0263734	2.17265e-23	4.15677e-21
cg13398346		11	68973272	OpenSea			NA		NA	0.0029708	0.468448	2.17398e-23	4.15704e-21
cg03262802		2	234118754	OpenSea			TRUE		TRUE	0.00306002	0.706034	2.17694e-23	4.15988e-21
cg10165952		17	58239449	OpenSea			TRUE		NA	0.00245285	0.582888	2.17785e-23	4.15988e-21
cg24924502	AATK	17	79109777	Island	Body		NA		NA	-0.00422417	0.847317	2.18319e-23	4.16781e-21
cg09791504	C1orf230	1	151701849	OpenSea	3'UTR		TRUE		NA	0.00209394	0.295354	2.19173e-23	4.18183e-21
cg25730584	AUTS2	7	70146354	OpenSea	Body		TRUE		NA	0.00525281	0.724964	2.20131e-23	4.1978e-21
cg09398762		13	107571965	S_Shore			TRUE		NA	0.00619836	0.408287	2.22862e-23	4.24758e-21
cg25839744	FAM65C	20	49253648	OpenSea	TSS1500		NA		NA	0.00226312	0.548194	2.23639e-23	4.26006e-21
cg00412294	NEDD1	12	97300582	N_Shore	TSS1500		NA		NA	-0.00570929	0.544097	2.24384e-23	4.27192e-21
cg19217535	RAB1A	2	65355927	N_Shore	Body	RDMR	NA		NA	-0.00371201	0.376922	2.27677e-23	4.33143e-21
cg08208595	PACS2	14	105793554	N_Shelf	Body		NA		NA	0.00404956	0.72355	2.27777e-23	4.33143e-21
cg07604732	LOC728276	16	19295632	OpenSea	TSS1500		NA		NA	-0.00331693	0.687328	2.27882e-23	4.33143e-21
cg22831978	MIR1237	11	64136089	Island	Body		NA		NA	0.00391105	0.562187	2.28835e-23	4.34718e-21
cg07755718		8	8639450	OpenSea			NA		NA	-0.00428882	0.858834	2.29605e-23	4.35943e-21
cg06100684	MSRB2	10	23383753	N_Shore	TSS1500		NA	Promoter_Associated	NA	-0.00482368	0.698336	2.31672e-23	4.3963e-21
cg26643754		5	141191462	OpenSea			NA	Unclassified	TRUE	0.0029662	0.132946	2.32353e-23	4.40682e-21
cg19102412	LOC84931	2	121224327	OpenSea	TSS1500		NA	Unclassified_Cell_type_specific	NA	0.00244422	0.676541	2.34041e-23	4.43643e-21
cg24691332	PARD3	10	34483325	OpenSea	Body		TRUE		NA	0.00238058	0.349038	2.3586e-23	4.4666e-21
cg14199150	BRD3	9	136930919	OpenSea	5'UTR		NA		NA	-0.00482401	0.624725	2.35888e-23	4.4666e-21
cg07797660	PRDM16	1	3239139	N_Shore	Body		NA		NA	0.00350526	0.55886	2.36351e-23	4.47294e-21
cg04907802	KCNQ1	11	2753950	OpenSea	Body		NA		NA	0.00263415	0.902552	2.37159e-23	4.4858e-21
cg02187503		22	38715768	S_Shelf			NA	Unclassified_Cell_type_specific	NA	0.00222133	0.608183	2.3758e-23	4.49132e-21
cg00297832	MIB2	1	1565541	Island	Body		NA		NA	0.00442339	0.396437	2.38667e-23	4.50756e-21
cg27300194		1	9339380	OpenSea			NA	Unclassified_Cell_type_specific	NA	0.00277822	0.393032	2.38697e-23	4.50756e-21
cg04237436	TRIM44	11	35808688	OpenSea	Body		TRUE		NA	0.00227215	0.334639	2.39296e-23	4.51643e-21
cg17465423	ZNF385A	12	54784180	N_Shore	Body		TRUE		TRUE	0.00343464	0.494142	2.40378e-23	4.53441e-21
cg11204139		17	3907470	Island			TRUE		TRUE	0.00670709	0.622182	2.40562e-23	4.53544e-21
cg10317026	EFNA3	1	155056636	N_Shore	Body		NA	Unclassified	NA	-0.00309054	0.412429	2.41607e-23	4.55097e-21
cg21899374		8	144915517	N_Shelf			NA		NA	-0.00328578	0.833861	2.41647e-23	4.55097e-21
cg18470815		15	96900643	Island			NA		NA	0.00204213	0.0740951	2.42772e-23	4.56969e-21
cg10496150	TBC1D16	17	77923603	N_Shore	Body		TRUE		NA	0.00451559	0.855367	2.44939e-23	4.608e-21
cg24533904	C1orf21	1	184467193	OpenSea	Body		TRUE		NA	0.00246627	0.898189	2.47112e-23	4.64639e-21
cg07592723		16	55365146	Island		RDMR	NA		NA	0.005868	0.198073	2.49401e-23	4.68691e-21
cg26194475		10	94455895	Island			NA		TRUE	0.00310033	0.333702	2.50923e-23	4.71297e-21
cg04372674	AQP1	7	30951381	OpenSea	TSS200		NA		NA	-0.00393952	0.124886	2.55416e-23	4.79478e-21
cg24994593	LDLRAD3	11	35966604	S_Shore	Body	RDMR	NA		NA	0.0031058	0.542971	2.55699e-23	4.79752e-21
cg10208934	ZNF512	2	27805334	N_Shore	TSS1500		NA	Promoter_Associated	NA	-0.00311564	0.857514	2.55901e-23	4.79872e-21
cg02477448	H1F0	22	38199880	N_Shore	TSS1500	RDMR	TRUE	Unclassified_Cell_type_specific	NA	0.00308406	0.370748	2.58562e-23	4.84603e-21
cg01557792	KIAA0247	14	70162755	OpenSea	Body		TRUE		NA	-0.00372314	0.354168	2.59289e-23	4.85704e-21
cg03043157	FHL5	6	97010903	OpenSea	5'UTR		NA		NA	-0.00482709	0.131172	2.60146e-23	4.87049e-21
cg22423984	EPB41L1	20	34734501	OpenSea	5'UTR		NA		NA	0.00308599	0.705211	2.61721e-23	4.89735e-21
cg03069098	TIAM2	6	155470310	OpenSea	Body		TRUE		NA	0.00606657	0.660928	2.6331e-23	4.92445e-21
cg06026425	CLINT1	5	157284650	N_Shore	Body		NA		NA	-0.00416164	0.604446	2.64751e-23	4.94875e-21
cg02235249	LOC440925	2	171570003	Island	Body		NA		NA	0.00418543	0.180492	2.64965e-23	4.95009e-21
cg25408008	MIER1	1	67391835	S_Shore	5'UTR		NA		NA	0.00297069	0.125642	2.68373e-23	5.0104e-21
cg14205632	LHFPL3	7	104524118	OpenSea	Body		TRUE	Unclassified	NA	0.00275156	0.29211	2.6848e-23	5.0104e-21
cg07405257	FAM48A	13	37631087	N_Shelf	5'UTR		NA		NA	-0.00214366	0.877531	2.71187e-23	5.05823e-21
cg21322248	PSTPIP1	15	77289047	OpenSea	Body		TRUE	Promoter_Associated	TRUE	-0.00343564	0.485656	2.72049e-23	5.0716e-21
cg24441922	ARL4C	2	235401950	N_Shelf	3'UTR		NA		NA	0.00452743	0.613965	2.72737e-23	5.0817e-21
cg01307684	ANTXR2	4	80886143	Island	Body		TRUE		NA	0.00665902	0.326734	2.75606e-23	5.13242e-21
cg02810967	NCAPG	4	17813558	S_Shore	Body		NA		NA	0.00277704	0.104521	2.76741e-23	5.15081e-21
cg19779123		11	57061898	OpenSea			TRUE		NA	-0.00323453	0.777205	2.7774e-23	5.16529e-21
cg18860873		12	79952102	OpenSea			TRUE		NA	-0.00294544	0.748371	2.77814e-23	5.16529e-21
cg08257257	MTL5	11	68517804	Island	Body		NA	Unclassified	NA	0.00590568	0.353542	2.7928e-23	5.18978e-21
cg00971695		14	65169664	N_Shore		RDMR	NA		NA	0.00262749	0.346522	2.82517e-23	5.24714e-21
cg13448775		9	116413170	OpenSea			TRUE		TRUE	0.00259961	0.680902	2.82794e-23	5.2495e-21
cg07863354	TBCD	17	80832611	S_Shelf	Body		NA		NA	-0.00452321	0.812007	2.84364e-23	5.27583e-21
cg20671920	SOX7	8	10586678	Island	Body		NA		NA	0.00400025	0.324536	2.85946e-23	5.30237e-21
cg03719070	RTKN	2	74668976	Island	1stExon		NA	Unclassified	NA	0.00305293	0.311394	2.87952e-23	5.33673e-21
cg02625024	PEMT	17	17465361	Island	Body		NA		TRUE	-0.00331312	0.620718	2.91285e-23	5.39565e-21
cg06122697	CYP26B1	2	72363781	OpenSea	Body		TRUE	Unclassified	NA	0.00184613	0.567947	2.92225e-23	5.4102e-21
cg08677140	PPP1R10	6	30582241	N_Shelf	5'UTR		NA		NA	-0.00558528	0.238387	2.94377e-23	5.44714e-21
cg21968515		11	62694099	Island		CDMR	NA	Unclassified_Cell_type_specific	NA	0.00252807	0.146767	2.94623e-23	5.4488e-21
cg15282632	CACNB3	12	49213195	S_Shore	Body	RDMR	NA	Unclassified	NA	0.00214353	0.299449	2.95475e-23	5.46168e-21
cg27048067	ERICH1	8	674560	OpenSea	Body		NA		NA	0.00466019	0.57709	2.96472e-23	5.47721e-21
cg01508045	FOXP4	6	41516162	Island	5'UTR	RDMR	NA		NA	0.00342096	0.163818	2.9666e-23	5.47778e-21
cg01045697	TBCD	17	80820757	S_Shore	Body		NA		NA	0.00331319	0.78819	2.98495e-23	5.50875e-21
cg07625271	EPOR	19	11492376	Island	Body		NA	Promoter_Associated	NA	0.00261627	0.104938	3.02142e-23	5.57312e-21
cg03809954		10	21801394	N_Shelf			TRUE	Unclassified_Cell_type_specific	NA	0.00537877	0.719781	3.06245e-23	5.64581e-21
cg25375029	PPPDE1	1	244820484	S_Shelf	Body		NA		NA	-0.00305237	0.887092	3.06618e-23	5.64972e-21
cg17500962		16	73178951	OpenSea			TRUE		NA	0.00325173	0.654864	3.07294e-23	5.65919e-21
cg12284382	RASD2	22	35940438	S_Shelf	5'UTR		NA		NA	0.00205418	0.0780456	3.08485e-23	5.67813e-21
cg11253886		2	47039669	OpenSea			TRUE		TRUE	0.00207905	0.227287	3.08802e-23	5.68096e-21
cg08200851	FARS2	6	5472095	OpenSea	Body		TRUE	Unclassified	NA	0.0036948	0.70877	3.1081e-23	5.7149e-21
cg22958047		15	96909322	N_Shore		RDMR	NA		NA	0.00321525	0.155674	3.11696e-23	5.72818e-21
cg00504595	TNFRSF19	13	24144985	OpenSea	1stExon		TRUE		NA	0.00162386	0.108458	3.12378e-23	5.73672e-21
cg13484608	MAP2K3	17	21191452	S_Shelf	Body		NA	Promoter_Associated	TRUE	-0.00537396	0.508139	3.12489e-23	5.73672e-21
cg01700504	GJB6	13	20805391	N_Shore	5'UTR		TRUE		NA	0.00378565	0.388618	3.12888e-23	5.74102e-21
cg05945401	BAT1	6	31506990	N_Shelf	Body		NA		NA	-0.00481959	0.62166	3.14307e-23	5.76403e-21
cg23172671		1	203482523	OpenSea			TRUE	Unclassified_Cell_type_specific	TRUE	0.00403587	0.328957	3.16494e-23	5.80109e-21
cg26118326	MCL1	1	150547677	N_Shelf	3'UTR		NA		NA	-0.00589525	0.711332	3.17677e-23	5.81973e-21
cg06361606		1	154915180	OpenSea			NA	Promoter_Associated	NA	-0.00414878	0.488287	3.17851e-23	5.81985e-21
cg07904475	LRBA	4	151500931	Island	Body	RDMR	TRUE		NA	0.00456639	0.107663	3.18053e-23	5.8205e-21
cg12563847		17	17529499	OpenSea			TRUE		NA	0.0025808	0.295738	3.19264e-23	5.8396e-21
cg15209769	HIVEP3	1	41979124	N_Shelf	Body		NA	Unclassified_Cell_type_specific	TRUE	0.00251282	0.501318	3.19463e-23	5.84018e-21
cg15799461		11	69264259	OpenSea			NA	Unclassified_Cell_type_specific	TRUE	0.0021186	0.271861	3.23575e-23	5.91227e-21
cg04142864	PHLDB1	11	118480576	Island	5'UTR		NA		TRUE	0.00299502	0.154487	3.24086e-23	5.9185e-21
cg09456094	SP100	2	231280878	OpenSea	5'UTR		NA	Promoter_Associated_Cell_type_specific	TRUE	-0.00444879	0.245614	3.24994e-23	5.93199e-21
cg11011736	AP2B1	17	33934776	OpenSea	Body		TRUE		NA	-0.00487482	0.495547	3.28137e-23	5.98622e-21
cg14011845	TBX4	17	59533635	Island	TSS200		NA		NA	0.00463403	0.400716	3.29648e-23	6.01065e-21
cg26929700	ZNF423	16	49732567	Island	Body		NA		NA	0.00341403	0.200473	3.30658e-23	6.02593e-21
cg07878800	NRN1	6	5999266	Island	Body	DMR	NA		TRUE	0.00399804	0.171193	3.31307e-23	6.0346e-21
cg16189217	PCCA	13	101047235	OpenSea	Body		TRUE		NA	0.00499487	0.55372	3.34044e-23	6.08129e-21
cg13708995		5	134880895	S_Shore		RDMR	NA	Unclassified_Cell_type_specific	NA	0.00383657	0.154326	3.34415e-23	6.08487e-21
cg24902478	NAV3	12	78241621	OpenSea	Body		TRUE		NA	-0.00356363	0.357575	3.34834e-23	6.08792e-21
cg27635976	CBFA2T3	16	88984067	OpenSea	5'UTR		NA		NA	0.00269207	0.239702	3.34931e-23	6.08792e-21
cg00507477		15	90292483	N_Shore		RDMR	NA	Unclassified_Cell_type_specific	NA	0.00532773	0.537697	3.35401e-23	6.09329e-21
cg07186730	KCNQ4	1	41253466	S_Shelf	Body		NA	Unclassified_Cell_type_specific	NA	0.00271405	0.352219	3.35694e-23	6.09544e-21
cg12187687		7	27253834	Island			TRUE		NA	0.00470717	0.284747	3.36718e-23	6.11086e-21
cg10720154		1	203525604	OpenSea			TRUE	Unclassified_Cell_type_specific	TRUE	0.00273478	0.350171	3.37169e-23	6.11588e-21
cg07551200		10	75684476	OpenSea			TRUE		NA	0.00280053	0.396608	3.39571e-23	6.15624e-21
cg13352518		11	124708433	N_Shore		RDMR	NA	Unclassified	NA	0.00503245	0.806502	3.40344e-23	6.16706e-21
cg11248999	EPHB2	1	23067453	OpenSea	Body		TRUE		NA	0.00305213	0.472267	3.44776e-23	6.24413e-21
cg04460816	SLC25A42	19	19221572	Island	Body		NA	Unclassified	NA	0.00248854	0.24419	3.48039e-23	6.29996e-21
cg02964555	NR4A2	2	157184401	Island	Body		NA		NA	0.00395208	0.366353	3.4921e-23	6.31788e-21
cg13719901	LRRC2	3	46608139	S_Shore	5'UTR		NA		TRUE	-0.00431545	0.231903	3.52757e-23	6.37875e-21
cg14635466	SNX31	8	101661245	N_Shore	Body	RDMR	TRUE	Unclassified_Cell_type_specific	TRUE	0.00349075	0.213645	3.52963e-23	6.37916e-21
cg02271139	AATK	17	79110023	S_Shore	Body		NA	Unclassified_Cell_type_specific	NA	-0.00325391	0.638134	3.5602e-23	6.43109e-21
cg21251140		2	181544642	OpenSea			TRUE		NA	0.00278588	0.358808	3.5703e-23	6.44386e-21
cg04496895	SVIL	10	30020140	N_Shelf	5'UTR		NA		NA	0.00402139	0.476813	3.57096e-23	6.44386e-21
cg19164335	DHH	12	49485151	Island	Body		NA		NA	0.00295585	0.151117	3.57389e-23	6.44582e-21
cg00211661	ARAP1	11	72433619	OpenSea	Body		TRUE	Promoter_Associated	NA	-0.00288135	0.309245	3.59988e-23	6.48935e-21
cg04939326	FAM168A	11	73278053	OpenSea	5'UTR		TRUE		NA	-0.00300106	0.716685	3.61853e-23	6.51961e-21
cg10373147		14	45133024	OpenSea			TRUE		NA	0.00311716	0.390908	3.63525e-23	6.54635e-21
cg01885796	PLCH1	3	155346882	OpenSea	Body		TRUE		NA	-0.00512715	0.782004	3.6491e-23	6.56791e-21
cg05729480	2020-09-09	17	75276428	N_Shore	TSS1500		TRUE	Unclassified	NA	0.0028025	0.371757	3.65662e-23	6.57806e-21
cg10276869		16	85336004	OpenSea			TRUE	Unclassified	TRUE	0.0036939	0.682607	3.66503e-23	6.5898e-21
cg05926784	RFX1	19	14073277	Island	3'UTR		NA		NA	0.00363593	0.322408	3.69294e-23	6.63657e-21
cg09831614	MAD1L1	7	1896739	S_Shore	Body		NA		NA	0.00310404	0.511084	3.69689e-23	6.64025e-21
cg03493146		7	69062082	N_Shore		DMR	NA		NA	0.00301762	0.161124	3.70782e-23	6.65448e-21
cg02688643	MGST2	4	140585523	OpenSea	TSS1500		NA		NA	0.0030792	0.627967	3.70863e-23	6.65448e-21
cg00929860	SPOCK2	10	73846448	N_Shore	3'UTR	RDMR	NA		NA	0.0053803	0.887691	3.71239e-23	6.65664e-21
cg06789445	MITF	3	69942668	OpenSea	Body		TRUE		NA	0.00344432	0.350594	3.71364e-23	6.65664e-21
cg15417654	LPP	3	187959138	OpenSea	5'UTR		TRUE		NA	0.00213917	0.263192	3.73216e-23	6.6864e-21
cg07953015	SEPW1	19	48285322	S_Shelf	3'UTR	CDMR	NA	Unclassified_Cell_type_specific	NA	-0.00468024	0.693742	3.77198e-23	6.75428e-21
cg02707071	HOXA2	7	27143806	S_Shore	TSS1500	CDMR	TRUE	Unclassified_Cell_type_specific	NA	0.00234269	0.366593	3.78522e-23	6.77136e-21
cg16749093	EHBP1L1	11	65352605	Island	Body		TRUE		TRUE	0.00583599	0.433862	3.7854e-23	6.77136e-21
cg00307066		4	41880465	Island		RDMR	NA		NA	0.00308327	0.292357	3.8075e-23	6.80742e-21
cg12847125	PTP4A3	8	142438036	N_Shore	Body		TRUE		NA	0.00486686	0.829265	3.84497e-23	6.8709e-21
cg21346154	TGFA	2	70699808	OpenSea	Body		TRUE		NA	0.00277464	0.739919	3.88366e-23	6.93648e-21
cg27553457	PPP1R13L	19	45899615	Island	Body		NA		NA	0.00338882	0.640847	3.88784e-23	6.93825e-21
cg04154465	WNT2B	1	113045271	S_Shore	Body		TRUE	Unclassified_Cell_type_specific	TRUE	0.00305997	0.273837	3.88862e-23	6.93825e-21
cg04384234	CFDP1	16	75411784	OpenSea	Body		TRUE		NA	0.002941	0.525734	3.90373e-23	6.96166e-21
cg01568973	PODN	1	53528991	S_Shore	Body		NA	Unclassified_Cell_type_specific	TRUE	0.00268204	0.303469	3.92259e-23	6.99172e-21
cg19320294	CA14	1	150229871	OpenSea	TSS1500		TRUE		NA	0.00469514	0.679533	3.94238e-23	7.02024e-21
cg01671575	PGBD5	1	230513566	OpenSea	TSS200		NA		NA	-0.00292776	0.839935	3.94355e-23	7.02024e-21
cg23222604		12	125110933	OpenSea			TRUE		TRUE	0.00216059	0.292996	3.94462e-23	7.02024e-21
cg13052101	MTL5	11	68517529	N_Shore	Body	RDMR	NA	Unclassified	NA	0.0036239	0.788341	3.96699e-23	7.05592e-21
cg05957749	KIAA0754	1	39875787	S_Shore	5'UTR	RDMR	NA		NA	0.00252442	0.142193	3.96871e-23	7.05592e-21
cg09451457		5	87440246	S_Shelf			NA		NA	0.00647749	0.206188	3.97077e-23	7.05599e-21
cg25397636	MAD1L1	7	1896220	Island	Body		NA		NA	0.00250951	0.213529	4.0059e-23	7.11479e-21
cg00937742	LYPD1	2	133429299	S_Shore	TSS1500		NA		NA	0.00519462	0.273012	4.02646e-23	7.14769e-21
cg23951816	TCF7L2	10	114888137	OpenSea	Body		TRUE		NA	0.00425474	0.820068	4.0467e-23	7.17996e-21
cg24817216	NKAIN3	8	63516617	OpenSea	Body		TRUE		NA	0.00243571	0.233017	4.07665e-23	7.22943e-21
cg18182216	FAM63A	1	150978385	N_Shelf	5'UTR	RDMR	NA		NA	-0.00418193	0.140014	4.08151e-23	7.23438e-21
cg20825994		4	25448682	OpenSea			TRUE		NA	-0.00363637	0.854747	4.08429e-23	7.23563e-21
cg21992400	SOX6	11	16170023	OpenSea	Body		TRUE		NA	0.00374211	0.172134	4.12556e-23	7.30505e-21
cg10101862	MAML2	11	95900850	OpenSea	Body		TRUE		NA	0.00256407	0.593634	4.15342e-23	7.35065e-21
cg04886846		10	102998662	S_Shelf			NA	Unclassified	TRUE	0.00488494	0.267656	4.17098e-23	7.37799e-21
cg08171483	CTDSPL	3	38010391	OpenSea	Body		NA		NA	-0.00373051	0.71933	4.18348e-23	7.39286e-21
cg06434451	MARCKSL1	1	32802291	S_Shore	TSS1500		NA		NA	0.00227636	0.427626	4.18362e-23	7.39286e-21
cg03981286	PDIA5	3	122863126	OpenSea	Body		TRUE		NA	0.00361641	0.246159	4.25728e-23	7.51922e-21
cg17053854	2020-09-09	17	75463180	OpenSea	Body		NA		NA	0.00241121	0.668037	4.26054e-23	7.52117e-21
cg17392455	SMTNL2	17	4510572	Island	Body		NA		NA	0.00384221	0.482465	4.30968e-23	7.60409e-21
cg02218496		2	172948176	Island		RDMR	NA		NA	0.0022541	0.0813378	4.31834e-23	7.61552e-21
cg02993825	KLHL35	11	75136839	S_Shore	Body		NA		TRUE	0.00359536	0.65755	4.35608e-23	7.6782e-21
cg20572537	LFNG	7	2557715	N_Shore	Body		TRUE		TRUE	0.00496074	0.244351	4.36825e-23	7.69577e-21
cg10203842	IFFO2	1	19280546	N_Shore	Body		NA	Unclassified_Cell_type_specific	NA	-0.00258244	0.894064	4.37458e-23	7.70303e-21
cg14952949	MYF5	12	81109806	N_Shore	TSS1500		TRUE		NA	0.00300406	0.307585	4.39799e-23	7.74035e-21
cg24020806	SFMBT2	10	7448857	N_Shore	5'UTR		NA		NA	0.00321912	0.632269	4.40478e-23	7.74724e-21
cg09179249	CASZ1	1	10732900	OpenSea	Body		NA		NA	0.0033582	0.535886	4.40634e-23	7.74724e-21
cg04424621	HIST1H2BJ	6	27101941	S_Shore	TSS1500		NA		NA	0.00175728	0.0573512	4.47322e-23	7.86088e-21
cg10374534	FAM20A	17	66554600	OpenSea	Body		NA		NA	0.00259549	0.817778	4.49892e-23	7.90206e-21
cg15611809		5	67483833	OpenSea		RDMR	NA		NA	0.00283479	0.321494	4.51234e-23	7.92014e-21
cg03594078	PIWIL2	8	22131675	N_Shore	TSS1500		TRUE		TRUE	-0.00587904	0.596611	4.51374e-23	7.92014e-21
cg11272547	KCNQ1OT1	11	2722440	S_Shore	TSS1500		NA		NA	0.00260538	0.384701	4.51856e-23	7.92374e-21
cg01729020	SAMD4A	14	55035889	S_Shore	Body	RDMR	NA		NA	0.0024779	0.387428	4.52033e-23	7.92374e-21
cg14244013		17	59473124	Island		RDMR	NA	Unclassified	NA	0.00665808	0.223678	4.52713e-23	7.93166e-21
cg26098401	RNF220	1	45083278	Island	Body		TRUE		NA	0.00406656	0.270187	4.54834e-23	7.96397e-21
cg22605822	DNMT3B	20	31367822	OpenSea	5'UTR		TRUE		NA	0.00246373	0.531855	4.5522e-23	7.96397e-21
cg13975344	SIX3	2	45170979	Island	Body	RDMR	NA		NA	0.00532027	0.333157	4.55424e-23	7.96397e-21
cg18160302	CADM1	11	115151454	OpenSea	Body		TRUE		NA	0.00418597	0.503763	4.55468e-23	7.96397e-21
[truncated: 92,836 more rows]
