# Supplementary material for: DNA methylation perturbations may link altered development and aging in the lung
Source: Aging (Albany NY). 2021 Jan 19;13(2):1742–64. doi: 10.18632/aging.202544 (PMC7880367; doi:10.18632/aging.202544)
Supplement: Supplementary Table 2 [file aging-13-202544-s003.xlsx]

## Sheet: Sheet1
Supplementary Table 2. Differentially methylated CpGs associated with age in the adult lung tissue dataset (2,217 CpGs; FDR adjusted P-Value < 0.05).
										Results after including the first surrogate variable
CG site	MAPINFO	CHR	Gene	RefGene_Group	Relation_to_CpG_Island	Regression-coefficient	AveBeta	P.Value	adj.P.Val	Regression-coefficient	AveBeta	P.Value	adj.P.Val
cg26830108	100813299	7	NA		N_Shelf	0.00183077	0.0667693	7.01714e-15	2.0038e-09	0.0019323	0.0667693	3.098e-18	1.08376e-12
cg07640648	39993697	19	DLL3	Body	Island	0.00128969	0.0380151	1.1456e-14	2.0038e-09	0.00127675	0.0380151	2.52348e-14	9.80865e-10
cg23813012	14026482	1	PRDM2	TSS1500	Island	0.00230415	0.100773	2.6998e-14	2.34465e-09	0.00240082	0.100773	4.142e-16	7.16819e-11
cg02650266	147558239	4	NA		Island	0.00286929	0.129273	2.72865e-14	2.34465e-09	0.00271661	0.129273	1.05509e-14	5.27285e-10
cg05024939	113442251	4	NA		N_Shore	0.00240027	0.262392	3.35117e-14	2.34465e-09	0.00232452	0.262392	6.37807e-14	2.02838e-09
cg27320127	47798396	2	KCNK12	TSS1500	Island	0.00293203	0.216692	4.53963e-14	2.61443e-09	0.00290429	0.216692	9.65172e-14	2.47682e-09
cg23606718	131513927	2	AMER3	5'UTR	Island	0.00322461	0.241007	5.61459e-14	2.61443e-09	0.00315395	0.241007	1.31969e-13	3.07775e-09
cg05617798	8113714	17	AURKB	5'UTR	Island	0.00111951	0.0658552	6.07151e-14	2.61443e-09	0.00115964	0.0658552	3.02857e-15	2.64869e-10
cg21186299	100808810	7	VGF	1stExon	Island	0.00103994	0.0348533	6.72617e-14	2.61443e-09	0.00104614	0.0348533	7.38468e-14	2.15279e-09
cg16477091	56833000	17	PPM1E	TSS1500	Island	0.00224631	0.151878	8.05988e-14	2.81955e-09	0.00225538	0.151878	9.91221e-14	2.47682e-09
cg10806820	48699090	3	CELSR3	1stExon	Island	0.00277055	0.218086	9.46523e-14	3.01017e-09	0.00282004	0.218086	4.23604e-14	1.48188e-09
cg12373771	17601381	22	CECR6	1stExon	Island	0.00281972	0.221888	1.25104e-13	3.64705e-09	0.00274938	0.221888	2.86049e-13	6.2542e-09
cg16867657	11044877	6	ELOVL2	TSS1500	Island	0.00432519	0.740697	1.4948e-13	3.76062e-09	0.00424432	0.740697	3.52205e-13	6.83888e-09
cg24724428	11044888	6	ELOVL2	TSS1500	Island	0.00608211	0.262114	1.505e-13	3.76062e-09	0.00589567	0.262114	3.08896e-13	6.35646e-09
cg01763090	31775406	15	OTUD7A	3'UTR	N_Shore	0.00191969	0.121401	1.88631e-13	4.39919e-09	0.00190529	0.121401	3.71438e-13	6.83888e-09
cg15906794	7197963	17	YBX2	TSS200	Island	0.00389139	0.169853	2.84299e-13	6.21596e-09	0.00406316	0.169853	5.0716e-15	3.54836e-10
cg02383785	127808848	7	NA		Island	0.00304257	0.215632	3.67944e-13	7.57156e-09	0.00297611	0.215632	8.62087e-13	1.31122e-08
cg05991454	147558435	4	NA		Island	0.00268973	0.122206	5.58215e-13	1.08488e-08	0.0024731	0.122206	7.73062e-15	4.50728e-10
cg07544187	19651235	19	CILP2	Body	Island	0.00379996	0.152566	6.04822e-13	1.11359e-08	0.00379879	0.152566	9.02908e-13	1.31609e-08
cg03036557	92050720	13	GPC5	TSS1500	N_Shore	0.00221344	0.0738782	1.79056e-12	3.13192e-08	0.00220444	0.0738782	3.03734e-12	3.79479e-08
cg08715791	66189297	11	NPAS4	Body	Island	0.00236269	0.118271	2.57329e-12	4.28668e-08	0.00252556	0.118271	6.14722e-16	7.16819e-11
cg21927946	4769688	19	MIR7-3	TSS1500		0.000995679	0.0509306	2.93388e-12	4.66522e-08	0.00094044	0.0509306	2.20323e-12	2.85461e-08
cg26158959	210111162	1	SYT14	TSS1500	N_Shore	0.00186199	0.130787	3.19064e-12	4.85291e-08	0.00190987	0.130787	8.38032e-13	1.31122e-08
cg12678562	92050726	13	GPC5	TSS1500	N_Shore	0.00209052	0.081177	5.93971e-12	8.64802e-08	0.00206933	0.081177	1.17127e-11	1.20511e-07
cg12757011	162281111	2	TBR1	3'UTR	S_Shore	0.00262244	0.411369	6.3196e-12	8.64802e-08	0.00257049	0.411369	1.43818e-11	1.39754e-07
cg13830081	10404363	6	TFAP2A	Body	Island	0.000869789	0.0344547	6.42744e-12	8.64802e-08	0.000879903	0.0344547	5.08802e-12	5.93307e-08
cg12451153	37099549	22	CACNG2	TSS1500	Island	0.00175066	0.070344	1.37218e-11	1.77787e-07	0.00165343	0.070344	1.30489e-11	1.30424e-07
cg04268670	76926341	5	OTP	Body	Island	0.00203406	0.144858	2.32255e-11	2.90174e-07	0.00211847	0.144858	1.47502e-12	2.064e-08
cg06782035	16179135	5	MARCH11	Body	Island	0.00280118	0.112204	3.35487e-11	4.04696e-07	0.00264371	0.112204	3.48178e-11	3.04504e-07
cg17783401	54790518	8	RGS20	Body	Island	0.00145804	0.0532192	4.45831e-11	5.19878e-07	0.00134821	0.0532192	1.10512e-11	1.17151e-07
cg17497271	40212781	15	GPR176	5'UTR	Island	0.00175323	0.116374	5.85696e-11	6.60941e-07	0.00165649	0.116374	6.89346e-11	5.48071e-07
cg20442599	108479500	6	NA		Island	0.00237863	0.149071	6.66912e-11	7.29072e-07	0.00228913	0.149071	1.38557e-10	9.30599e-07
cg22736354	18122719	6	NHLRC1	1stExon	Island	0.00248238	0.298132	9.11633e-11	9.66403e-07	0.00248639	0.298132	1.18185e-10	8.10669e-07
cg09438147	210636533	2	UNC80	TSS200	Island	0.00218966	0.119869	1.11761e-10	1.14991e-06	0.00199076	0.119869	5.98451e-12	6.75335e-08
cg10778288	113917994	12	NA		Island	0.00128021	0.085197	1.25837e-10	1.25775e-06	0.00118376	0.085197	4.37384e-11	3.64305e-07
cg04880546	120868468	12	NA			0.00234737	0.179841	1.34681e-10	1.30874e-06	0.00238618	0.179841	8.4411e-11	6.41938e-07
cg22108374	74557527	15	CCDC33	Body		0.00380373	0.498732	1.40526e-10	1.32864e-06	0.00343635	0.498732	3.47056e-12	4.18652e-08
cg18473521	54448265	12	HOXC4	Body	S_Shore	0.00417648	0.539345	1.61893e-10	1.49037e-06	0.00418571	0.539345	2.03903e-10	1.22984e-06
cg26792755	140714919	7	MRPS33	TSS200	Island	0.00277448	0.0650562	1.67934e-10	1.50635e-06	0.00285311	0.0650562	4.78745e-11	3.89483e-07
cg00394316	22539822	7	MGC87042	5'UTR	Island	0.00309505	0.151568	2.06567e-10	1.80657e-06	0.00313884	0.151568	1.49678e-10	9.69652e-07
cg17895157	41913743	15	NA		Island	0.00076556	0.0285511	2.29346e-10	1.95686e-06	0.000739267	0.0285511	5.05037e-10	2.73156e-06
cg21572722	11044894	6	ELOVL2	TSS1500	Island	0.00256149	0.462184	2.40024e-10	1.9643e-06	0.00238945	0.462184	1.81854e-10	1.11609e-06
cg03963327	9025730	11	NRIP3	TSS200	Island	0.00102596	0.0428788	2.45416e-10	1.9643e-06	0.00105344	0.0428788	8.0787e-11	6.28031e-07
cg08622677	3601306	12	PRMT8	Body	Island	0.00190514	0.227466	2.473e-10	1.9643e-06	0.00181763	0.227466	4.56073e-10	2.53248e-06
cg04169021	35060451	17	NA		Island	0.00216258	0.100816	2.52679e-10	1.9643e-06	0.00199782	0.100816	1.00953e-10	7.51405e-07
cg08097417	130419133	7	KLF14	TSS1500	Island	0.00201011	0.222254	2.96213e-10	2.25267e-06	0.00215572	0.222254	4.80889e-13	8.41138e-09
cg25049597	75119018	15	CPLX3	1stExon		0.00037425	0.0282746	3.40789e-10	2.53653e-06	0.000362589	0.0282746	7.59971e-10	3.90967e-06
cg17110586	36454623	19	NA		S_Shelf	0.00293469	0.317931	3.55159e-10	2.53678e-06	0.00261349	0.317931	1.57375e-12	2.11746e-08
cg03968755	85418816	4	NKX6-1	1stExon	Island	0.00228368	0.23318	3.55326e-10	2.53678e-06	0.00212538	0.23318	2.55046e-10	1.51223e-06
cg00748589	11653486	12	NA		Island	0.00255269	0.258164	3.77207e-10	2.63913e-06	0.002304	0.258164	1.61659e-11	1.52844e-07
cg07547549	44658225	20	SLC12A5	Body	Island	0.00410315	0.426189	5.10187e-10	3.49954e-06	0.00367334	0.426189	8.20991e-12	8.97513e-08
cg22263793	42501398	19	NA		Island	0.000604696	0.0361008	5.79878e-10	3.90108e-06	0.000603756	0.0361008	8.18646e-10	4.11434e-06
cg07584066	57642749	17	DHX40	TSS200	Island	0.00501436	0.377991	6.59291e-10	4.35164e-06	0.00493777	0.377991	1.30102e-09	5.68913e-06
cg07558287	127347884	3	PODXL2	TSS200	Island	0.0012113	0.0494802	6.72506e-10	4.35667e-06	0.00119318	0.0494802	1.31874e-09	5.69541e-06
cg12663656	120427667	12	CCDC64	1stExon	Island	0.00137226	0.0367514	6.92113e-10	4.40216e-06	0.00141533	0.0367514	1.77345e-10	1.10786e-06
cg14168923	28366606	13	GSX1	TSS200	Island	0.00136067	0.0482855	8.09781e-10	5.05861e-06	0.00127682	0.0482855	9.93599e-10	4.63449e-06
cg12943155	127347978	3	PODXL2	TSS200	Island	0.0010214	0.0373066	8.86615e-10	5.44142e-06	0.00102683	0.0373066	9.76398e-10	4.6158e-06
cg08318076	62051812	8	NA		Island	0.00130724	0.0775938	9.84588e-10	5.93852e-06	0.00134007	0.0775938	3.97625e-10	2.27234e-06
cg16969368	57642752	17	DHX40	TSS200	Island	0.00354481	0.280615	1.02827e-09	6.00691e-06	0.00349832	0.280615	1.93152e-09	7.67835e-06
cg19029181	147130536	3	ZIC1	Body	Island	0.00387873	0.329857	1.03027e-09	6.00691e-06	0.00365999	0.329857	1.5709e-09	6.60042e-06
cg05213896	50393653	19	IL4I1	Body	Island	0.0036185	0.289049	1.09793e-09	6.29647e-06	0.00360792	0.289049	1.60376e-09	6.60042e-06
cg11215976	236849942	1	ACTN2	1stExon	Island	0.00301177	0.155388	1.15135e-09	6.49631e-06	0.00272015	0.155388	1.0707e-10	7.71916e-07
cg23639989	14581642	5	FAM105A	TSS1500	Island	0.00147754	0.0738851	1.36726e-09	7.59211e-06	0.00148288	0.0738851	1.60249e-09	6.60042e-06
cg14633456	113445269	4	NA		Island	0.00126569	0.0537574	1.41291e-09	7.723e-06	0.00132523	0.0537574	1.08122e-10	7.71916e-07
cg23027580	67089513	8	CRH	Body	Island	0.00149068	0.142447	1.48258e-09	7.8885e-06	0.0014257	0.142447	3.06111e-09	1.08258e-05
cg26381364	103889772	12	C12orf42	TSS200	Island	0.000598034	0.0374159	1.50956e-09	7.8885e-06	0.000584101	0.0374159	3.23486e-09	1.12043e-05
cg22158769	39187539	2	LOC375196	TSS200	Island	0.000749522	0.0233566	1.51398e-09	7.8885e-06	0.000722149	0.0233566	3.33177e-09	1.13159e-05
cg23174607	64281846	6	PTP4A1	TSS200	N_Shore	0.00212964	0.133092	1.53339e-09	7.8885e-06	0.00199038	0.133092	1.75496e-09	7.13874e-06
cg22349506	54790349	8	RGS20	Body	Island	0.000584549	0.0351301	1.68964e-09	8.5664e-06	0.000580637	0.0351301	2.71111e-09	1.00895e-05
cg01202666	19157650	7	TWIST1	TSS1500	Island	0.00140373	0.103493	1.76391e-09	8.70062e-06	0.00135569	0.103493	3.91964e-09	1.23531e-05
cg03066081	77784036	17	NA		Island	0.000667662	0.0406308	1.76586e-09	8.70062e-06	0.000661191	0.0406308	3.04418e-09	1.08258e-05
cg02071825	56833096	17	PPM1E	TSS200	Island	0.000769699	0.0409501	1.87216e-09	9.01581e-06	0.000783543	0.0409501	1.16834e-09	5.17363e-06
cg11299854	132083184	5	CCNI2	1stExon	Island	0.00120565	0.0498089	1.89468e-09	9.01581e-06	0.00124824	0.0498089	4.02729e-10	2.27234e-06
cg02479575	4769653	19	MIR7-3	TSS1500		0.000616848	0.0263587	1.90715e-09	9.01581e-06	0.00058206	0.0263587	3.06368e-09	1.08258e-05
cg21623865	9746317	3	CPNE9	Body	Island	0.00136928	0.147565	1.9344e-09	9.02271e-06	0.0013674	0.147565	2.66951e-09	1.00415e-05
cg25096566	136871941	6	MAP7	TSS200	Island	0.00205163	0.0921614	2.07113e-09	9.53248e-06	0.00202408	0.0921614	3.84864e-09	1.22396e-05
cg23433607	5892338	20	CHGB	Body	Island	0.000907217	0.0488353	2.09819e-09	9.53248e-06	0.000911314	0.0488353	2.37082e-09	9.11401e-06
cg11419064	2291264	11	ASCL2	1stExon	Island	0.00183908	0.12728	2.13387e-09	9.5703e-06	0.00174196	0.12728	3.79387e-09	1.22006e-05
cg07873590	17858298	19	FCHO1	TSS1500	N_Shore	0.00116482	0.0496325	2.18394e-09	9.67087e-06	0.00123752	0.0496325	3.64611e-11	3.11099e-07
cg12141030	44803447	3	KIAA1143	TSS1500	Island	0.00362305	0.282435	2.29946e-09	1.00552e-05	0.00399998	0.282435	1.85718e-14	8.1211e-10
cg16181396	147126206	3	ZIC1	TSS1500	N_Shore	0.00288977	0.326026	2.35765e-09	1.00743e-05	0.00294276	0.326026	1.45723e-09	6.21678e-06
cg15244223	118228493	6	SLC35F1	TSS200	Island	0.000894861	0.0296108	2.36144e-09	1.00743e-05	0.000861074	0.0296108	5.17913e-09	1.47726e-05
cg25478614	187387866	3	SST	Body	N_Shore	0.00385134	0.339237	2.80541e-09	1.18242e-05	0.00377627	0.339237	5.70114e-09	1.59552e-05
cg27252696	100912940	6	SIM1	TSS1500	Island	0.00153584	0.0551384	3.15236e-09	1.31283e-05	0.0013926	0.0551384	7.14415e-10	3.73017e-06
cg02983163	47010461	21	NA		Island	0.00190516	0.108661	3.55096e-09	1.46143e-05	0.00190956	0.108661	4.31951e-09	1.32551e-05
cg14361627	130419116	7	KLF14	TSS1500	Island	0.00258815	0.292361	4.04969e-09	1.64731e-05	0.00276959	0.292361	3.29568e-11	2.9562e-07
cg09704159	48470321	15	MYEF2	1stExon	Island	0.0010303	0.0727032	4.5363e-09	1.79438e-05	0.00099603	0.0727032	1.00441e-08	2.3741e-05
cg06128028	35293892	7	TBX20	TSS200	Island	0.00134777	0.119663	4.54935e-09	1.79438e-05	0.00130765	0.119663	9.99202e-09	2.3741e-05
cg00393837	105470050	2	NA		Island	0.00195497	0.147201	4.58153e-09	1.79438e-05	0.00190533	0.147201	9.80159e-09	2.36473e-05
cg04894619	179754615	3	PEX5L	TSS200	Island	0.00123519	0.0585848	4.61641e-09	1.79438e-05	0.00113864	0.0585848	3.49809e-09	1.16545e-05
cg14352983	6414976	18	L3MBTL4	TSS200	S_Shore	0.00166802	0.0323199	4.76327e-09	1.83112e-05	0.00154518	0.0323199	4.56303e-09	1.3414e-05
cg21200408	21378211	20	NKX2-4	TSS200	Island	0.00157768	0.0741021	4.85758e-09	1.84414e-05	0.00144251	0.0741021	2.36546e-09	9.11401e-06
cg18556788	6414974	18	L3MBTL4	TSS200	S_Shore	0.000942951	0.0212735	4.90259e-09	1.84414e-05	0.00089182	0.0212735	8.89885e-09	2.22361e-05
cg18795809	10458531	4	ZNF518B	5'UTR	Island	0.00321543	0.0600024	5.05073e-09	1.85621e-05	0.00333384	0.0600024	1.08022e-09	4.95618e-06
cg11071401	48637194	17	CACNA1G	TSS1500	Island	0.00317744	0.352041	5.05114e-09	1.85621e-05	0.00293631	0.352041	4.39697e-09	1.32601e-05
cg06441568	85419504	4	NKX6-1	TSS200	Island	0.000786772	0.0446	5.13767e-09	1.85621e-05	0.000734444	0.0446	6.65858e-09	1.80569e-05
cg17688525	6414978	18	L3MBTL4	TSS200	S_Shore	0.00270644	0.056964	5.14692e-09	1.85621e-05	0.00250897	0.056964	5.16048e-09	1.47726e-05
cg23602974	35293884	7	TBX20	TSS200	Island	0.00113397	0.0937437	5.4372e-09	1.94089e-05	0.00107745	0.0937437	1.07296e-08	2.49846e-05
cg07846081	131754018	3	CPNE4	TSS200	Island	0.0013943	0.10004	5.70463e-09	2.01579e-05	0.00132839	0.10004	1.1685e-08	2.65436e-05
cg21860429	105389544	6	NA		Island	0.00180546	0.19579	5.88083e-09	2.05727e-05	0.00182618	0.19579	5.07895e-09	1.47726e-05
cg13677571	155250210	7	EN2	TSS1500	Island	0.00191534	0.122282	6.41568e-09	2.22215e-05	0.00175703	0.122282	4.10178e-09	1.28117e-05
cg07060551	51198381	19	SHANK1	Body	Island	0.00295623	0.177701	7.03085e-09	2.41135e-05	0.00264899	0.177701	8.36228e-10	4.1202e-06
cg08857144	70995351	2	ADD2	TSS200	Island	0.000678697	0.0312465	8.22251e-09	2.78415e-05	0.000682654	0.0312465	8.80226e-09	2.2153e-05
cg04739647	176987462	2	HOXD9	5'UTR	Island	0.00176582	0.0691711	8.27703e-09	2.78415e-05	0.00166021	0.0691711	1.37772e-08	3.05038e-05
cg06784991	53308768	1	ZYG11A	Body	Island	0.0021371	0.224266	8.41454e-09	2.80345e-05	0.00209876	0.224266	1.62888e-08	3.45875e-05
cg21449170	130419062	7	KLF14	TSS200	Island	0.00106503	0.0399664	8.7892e-09	2.90065e-05	0.0010848	0.0399664	5.60227e-09	1.5805e-05
cg22454769	106015767	2	FHL2	TSS200	Island	0.0045531	0.464221	9.29706e-09	3.03958e-05	0.0042554	0.464221	1.34627e-08	2.99974e-05
cg13612447	2653188	17	NA		Island	0.00121081	0.0546957	9.55397e-09	3.09465e-05	0.00124761	0.0546957	3.28351e-09	1.12614e-05
cg23956238	55672036	19	DNAAF3	Body	Island	0.00169723	0.171304	9.6546e-09	3.09856e-05	0.00171725	0.171304	8.27306e-09	2.13687e-05
cg03323636	9025502	11	NRIP3	5'UTR	Island	0.0010557	0.0495869	9.82567e-09	3.10558e-05	0.00108242	0.0495869	4.49438e-09	1.33242e-05
cg19230755	65878503	7	NA		Island	0.00349972	0.315114	9.85401e-09	3.10558e-05	0.0032252	0.315114	8.73167e-09	2.21345e-05
cg08614301	19729716	19	PBX4	TSS1500	Island	0.00200397	0.116096	9.9496e-09	3.1077e-05	0.00212686	0.116096	3.0789e-10	1.79513e-06
cg14618638	151722471	7	GALNT11	TSS1500	N_Shore	0.00156227	0.0689549	1.03592e-08	3.19535e-05	0.00143062	0.0689549	6.87561e-09	1.82217e-05
cg18343474	229566908	1	NA		N_Shore	0.00171022	0.125839	1.04129e-08	3.19535e-05	0.00160245	0.125839	1.63137e-08	3.45875e-05
cg26161329	56832991	17	PPM1E	TSS1500	Island	0.00158925	0.10064	1.15947e-08	3.52707e-05	0.00153116	0.10064	2.55531e-08	5.07905e-05
cg07303143	44803452	3	KIAA1143	TSS1500	Island	0.00449119	0.304668	1.30711e-08	3.9419e-05	0.00496434	0.304668	6.03477e-13	1.0053e-08
cg00384539	70983567	8	PRDM14	TSS200	Island	0.00228638	0.0887876	1.44451e-08	4.31904e-05	0.00208802	0.0887876	9.14011e-09	2.26769e-05
cg06335143	53308654	1	ZYG11A	Body	Island	0.00207185	0.216715	1.49243e-08	4.42449e-05	0.00201724	0.216715	3.14222e-08	6.07309e-05
cg14585700	37027605	9	PAX5	Body	Island	0.00166668	0.0816015	1.54779e-08	4.55007e-05	0.00177022	0.0816015	5.07542e-10	2.73156e-06
cg24300475	3601514	12	PRMT8	Body	Island	0.00081681	0.0732737	1.66782e-08	4.86207e-05	0.000792542	0.0732737	3.58645e-08	6.78179e-05
cg07850604	36003443	14	INSM2	5'UTR	Island	0.00195719	0.128595	1.76129e-08	5.04484e-05	0.00205096	0.128595	2.02812e-09	7.9718e-06
cg00043095	223289277	2	SGPP2	TSS200	Island	0.000628362	0.0254005	1.76643e-08	5.04484e-05	0.000616429	0.0254005	3.40219e-08	6.46835e-05
cg22147660	5895006	18	NA		Island	0.00190453	0.19522	1.77378e-08	5.04484e-05	0.00169971	0.19522	2.5248e-09	9.60044e-06
cg00590036	158957433	6	TMEM181	TSS200	Island	0.0030246	0.208609	1.83862e-08	5.16092e-05	0.00309619	0.208609	9.46131e-09	2.31544e-05
cg24466241	53308908	1	ZYG11A	Body	Island	0.00290257	0.215238	1.85118e-08	5.16092e-05	0.00276169	0.215238	3.86494e-08	7.10196e-05
cg15001747	35292587	17	NA		Island	0.00164895	0.167617	1.86105e-08	5.16092e-05	0.00151237	0.167617	1.54384e-08	3.34177e-05
cg24938830	210636539	2	UNC80	TSS200	Island	0.00286567	0.114368	1.87988e-08	5.16092e-05	0.00256686	0.114368	3.75622e-09	1.22006e-05
cg04100532	210636560	2	UNC80	TSS200	Island	0.00299593	0.11295	1.88836e-08	5.16092e-05	0.00274679	0.11295	1.54753e-08	3.34177e-05
cg08534628	100650073	13	NA		Island	0.00209643	0.353418	1.91227e-08	5.18575e-05	0.00184816	0.353418	8.23278e-10	4.11434e-06
cg00012397	17756435	11	KCNC1	TSS1500	Island	0.00114526	0.033777	2.1079e-08	5.6413e-05	0.00115329	0.033777	2.16436e-08	4.45382e-05
cg13210467	99775443	7	STAG3	TSS200	Island	0.00260612	0.458857	2.11251e-08	5.6413e-05	0.00236566	0.458857	1.08559e-08	2.49846e-05
cg14336011	139096738	9	LHX3	Body	Island	0.00191262	0.126426	2.23735e-08	5.91052e-05	0.00187246	0.126426	4.4063e-08	7.70719e-05
cg16541931	25463757	10	LOC100128811	Body	Island	0.00184799	0.122945	2.24712e-08	5.91052e-05	0.00164823	0.122945	3.48719e-09	1.16545e-05
cg05344430	28366600	13	GSX1	TSS200	Island	0.00129224	0.0564212	2.2712e-08	5.92929e-05	0.00120972	0.0564212	3.74816e-08	7.01179e-05
cg21200656	21378072	20	NKX2-4	TSS200	Island	0.00162433	0.0914634	2.31691e-08	6.00382e-05	0.00145508	0.0914634	5.1941e-09	1.47726e-05
cg21483700	12943593	19	RTBDN	Body	Island	0.000526995	0.0323138	2.55813e-08	6.58014e-05	0.000536892	0.0323138	1.66778e-08	3.51465e-05
cg08482682	107799197	11	RAB39A	TSS200	Island	0.000280209	0.0170726	2.62156e-08	6.69408e-05	0.000286205	0.0170726	1.51491e-08	3.31222e-05
cg19401340	56833197	17	PPM1E	TSS200	Island	0.0014988	0.0716801	2.64833e-08	6.69498e-05	0.00155735	0.0716801	5.96974e-09	1.64439e-05
cg15789607	4769690	19	MIR7-3	TSS1500		0.00187335	0.158345	2.66018e-08	6.69498e-05	0.00166696	0.158345	3.73908e-09	1.22006e-05
cg19544662	88752056	2	FOXI3	TSS200	Island	0.000841892	0.0295901	2.72062e-08	6.75037e-05	0.000861062	0.0295901	1.48797e-08	3.27378e-05
cg06570224	157812475	3	NA		Island	0.00209096	0.36325	2.72079e-08	6.75037e-05	0.0019476	0.36325	4.06717e-08	7.22514e-05
cg24637426	192233231	3	FGF12	Body	S_Shore	0.00371072	0.274134	3.07133e-08	7.56643e-05	0.00364652	0.274134	5.69208e-08	9.6195e-05
cg24347663	70995349	2	ADD2	TSS200	Island	0.000414783	0.0187187	3.09924e-08	7.57699e-05	0.000410575	0.0187187	5.02987e-08	8.58332e-05
cg18517266	5827811	19	NRTN	Body	Island	0.0016025	0.0679582	3.11894e-08	7.57699e-05	0.00160276	0.0679582	3.94903e-08	7.15789e-05
cg00107187	105070998	14	TMEM179	1stExon	Island	0.00158742	0.138965	3.31966e-08	8.00899e-05	0.00142381	0.138965	9.71511e-09	2.36014e-05
cg13473356	179754613	3	PEX5L	TSS200	Island	0.000807739	0.0318634	3.39071e-08	8.12438e-05	0.000746385	0.0318634	4.1735e-08	7.37374e-05
cg24888989	44803291	3	KIF15	1stExon	Island	0.00120949	0.0542301	3.59016e-08	8.54375e-05	0.00131344	0.0542301	1.11988e-10	7.83529e-07
cg19031565	72978794	17	NA		S_Shore	0.00156466	0.174319	3.92487e-08	9.27716e-05	0.00141294	0.174319	1.87436e-08	3.92635e-05
cg02331561	2391081	16	ABCA17P	Body	Island	0.00102964	0.0505844	4.19388e-08	9.83308e-05	0.00107611	0.0505844	6.8213e-09	1.82158e-05
cg17729667	25566382	20	NINL	TSS1500	Island	0.00164318	0.114789	4.2343e-08	9.83308e-05	0.00149138	0.114789	2.70183e-08	5.30994e-05
cg11082362	36003181	14	INSM2	TSS200	Island	0.00155731	0.0467731	4.24438e-08	9.83308e-05	0.001622	0.0467731	8.71634e-09	2.21345e-05
cg02018902	79576149	15	ANKRD34C	5'UTR	Island	0.00159321	0.118336	4.37642e-08	0.000100723	0.00145716	0.118336	3.94642e-08	7.15789e-05
cg23500537	140419819	5	NA			0.00289326	0.411559	4.6411e-08	0.000105446	0.00265425	0.411559	4.75243e-08	8.23032e-05
cg16797691	95363755	13	SOX21	1stExon	Island	0.000564637	0.0243953	4.64195e-08	0.000105446	0.000551982	0.0243953	9.1145e-08	0.000144931
cg00677866	61051685	20	GATA5	TSS1500	Island	0.00152878	0.111702	4.82203e-08	0.00010883	0.00140109	0.111702	4.79981e-08	8.23088e-05
cg02189888	46582065	19	NA		Island	0.00238399	0.362087	4.89771e-08	0.00010983	0.00215852	0.362087	2.9044e-08	5.67618e-05
cg24847541	92051154	13	GPC5	5'UTR	Island	0.000772607	0.0479593	4.95549e-08	0.000110187	0.000784846	0.0479593	3.71413e-08	6.98549e-05
cg26677448	102505345	10	PAX2	TSS200	Island	0.000916126	0.0794811	4.98104e-08	0.000110187	0.000867671	0.0794811	1.02455e-07	0.000160007
cg18745566	1725696	19	NA		Island	0.00123487	0.0588996	5.01369e-08	0.000110187	0.00120596	0.0588996	9.95339e-08	0.000156845
cg22197050	63276183	2	LOC100132215	TSS1500	Island	0.00203104	0.267038	5.03961e-08	0.000110187	0.00198859	0.267038	9.70101e-08	0.00015356
cg11359984	123603539	3	MYLK	TSS1500	Island	0.001503	0.14773	5.43922e-08	0.000118185	0.00145878	0.14773	1.14084e-07	0.000176591
cg07720856	232572668	2	PTMA	TSS1500	Island	0.00162366	0.081752	5.47815e-08	0.000118296	0.00166697	0.081752	2.59065e-08	5.12021e-05
cg19343530	28831388	6	NA		N_Shore	0.00185487	0.0791751	5.62592e-08	0.000120132	0.00195927	0.0791751	4.36696e-09	1.32601e-05
cg11764177	6266416	1	RNF207	5'UTR	Island	0.000704629	0.0456039	5.63183e-08	0.000120132	0.000701742	0.0456039	7.88638e-08	0.000127136
cg22231908	144815907	8	FAM83H	1stExon	Island	0.000253635	0.0217927	6.24774e-08	0.000132457	0.000257505	0.0217927	4.77842e-08	8.23088e-05
cg12559031	48046365	17	DLX4	TSS200	Island	0.000786553	0.0688708	6.28537e-08	0.000132457	0.000811359	0.0688708	2.36429e-08	4.80867e-05
cg04796181	27839850	6	HIST1H3I	1stExon	Island	0.00119881	0.0542369	6.49073e-08	0.000135966	0.00132084	0.0542369	3.00832e-11	2.76945e-07
cg17100218	45275567	18	NA		Island	0.00063909	0.0289242	6.69163e-08	0.00013934	0.000612903	0.0289242	1.45941e-07	0.000211843
cg21174055	139097029	9	LHX3	TSS200	S_Shore	0.00034906	0.0219318	7.37844e-08	0.000152732	0.000335172	0.0219318	1.60284e-07	0.000226095
cg12899421	151512592	1	TUFT1	TSS200	N_Shore	0.00145509	0.114766	7.68356e-08	0.000158112	0.0014005	0.114766	1.66787e-07	0.000233386
cg14138050	14693504	9	ZDHHC21	TSS200	Island	0.00103607	0.0327155	7.9082e-08	0.000161783	0.00109257	0.0327155	7.56623e-09	1.97527e-05
cg00065935	120627088	3	STXBP5L	1stExon	Island	0.00157192	0.150422	8.17056e-08	0.00016477	0.00155252	0.150422	1.35392e-07	0.000198174
cg06291867	92617162	10	HTR7	1stExon	Island	0.0016564	0.156315	8.17768e-08	0.00016477	0.00150169	0.156315	6.0259e-08	0.00010133
cg07955995	130419159	7	KLF14	TSS1500	Island	0.00157172	0.0671341	8.19551e-08	0.00016477	0.00167641	0.0671341	3.03181e-09	1.08258e-05
cg24806126	14581620	5	FAM105A	TSS1500	Island	0.00222588	0.152945	8.5785e-08	0.000171485	0.00217149	0.152945	1.69851e-07	0.000235786
cg27314569	122852461	11	BSX	TSS200	Island	0.00201093	0.193681	8.97191e-08	0.00017734	0.00178739	0.193681	2.32314e-08	4.75261e-05
cg08593261	85419494	4	NKX6-1	TSS200	Island	0.000844826	0.0289983	8.97279e-08	0.00017734	0.000799509	0.0289983	1.86418e-07	0.000251791
cg26290632	91094847	8	CALB1	1stExon		0.00203667	0.13292	9.11111e-08	0.000179062	0.00179509	0.13292	1.27014e-08	2.86663e-05
cg22374237	126891197	7	GRM8	5'UTR	N_Shore	0.00260268	0.238233	9.34766e-08	0.000181984	0.00240123	0.238233	1.28486e-07	0.000192909
cg22605303	91172472	1	NA		Island	0.00137833	0.0947661	9.36385e-08	0.000181984	0.00123059	0.0947661	3.29652e-08	6.33632e-05
cg09499629	130419136	7	KLF14	TSS1500	Island	0.00138366	0.0921412	9.58348e-08	0.000185224	0.00149361	0.0921412	1.09916e-09	4.95618e-06
cg16717122	51973920	15	SCG3	5'UTR	S_Shore	0.00173651	0.178084	9.68222e-08	0.000186104	0.00149501	0.178084	1.10507e-09	4.95618e-06
cg05301866	162279964	2	TBR1	Body	Island	0.00176029	0.280607	9.82207e-08	0.00018776	0.00166682	0.280607	2.05503e-07	0.000269252
cg23211240	111383624	11	MIR34B	TSS200	Island	0.00204792	0.109112	9.88274e-08	0.000187893	0.00191338	0.109112	1.77435e-07	0.000243417
cg05371578	147128157	3	ZIC1	1stExon	Island	0.00276446	0.279161	9.98893e-08	0.00018832	0.00242746	0.279161	1.08284e-08	2.49846e-05
cg23756251	179754521	3	PEX5L	TSS200	Island	0.000806594	0.060126	1.00128e-07	0.00018832	0.000772525	0.060126	2.18018e-07	0.000282476
cg15201877	71512973	1	PTGER3	1stExon	Island	0.00151382	0.156924	1.06695e-07	0.000199597	0.00137174	0.156924	8.29967e-08	0.000133185
cg23158811	19729732	19	PBX4	TSS1500	Island	0.00118663	0.0752388	1.07473e-07	0.000199982	0.00125928	0.0752388	6.72081e-09	1.80855e-05
cg10548038	92050731	13	GPC5	TSS1500	N_Shore	0.000691855	0.0394569	1.08044e-07	0.000199982	0.000705394	0.0394569	7.15288e-08	0.000116928
cg06231995	140024593	9	NA		Island	0.00155222	0.0959181	1.09688e-07	0.000201957	0.00160026	0.0959181	4.44263e-08	7.73208e-05
cg11354629	28366598	13	GSX1	TSS200	Island	0.00146188	0.103324	1.1282e-07	0.000206635	0.00135237	0.103324	1.69633e-07	0.000235786
cg27209578	175193470	2	NA		Island	0.00177682	0.201827	1.24562e-07	0.000226672	0.0016597	0.201827	2.26638e-07	0.000292561
cg24526702	56833201	17	PPM1E	TSS200	Island	0.000344507	0.026095	1.25163e-07	0.000226672	0.000354467	0.026095	5.60587e-08	9.51981e-05
cg00840310	74061514	9	NA		Island	0.00117024	0.0663565	1.25704e-07	0.000226672	0.00106497	0.0663565	1.20201e-07	0.000182032
cg18691434	99775425	7	STAG3	TSS200	Island	0.00175844	0.204645	1.36716e-07	0.000244607	0.00164841	0.204645	2.6274e-07	0.000327094
cg04753583	47062565	21	NA		Island	0.00192152	0.236665	1.37048e-07	0.000244607	0.00182722	0.236665	2.94848e-07	0.000350835
cg11881754	75889293	7	SRRM3	Body	Island	0.000719868	0.0205823	1.39449e-07	0.000247629	0.000674731	0.0205823	2.67631e-07	0.000330827
cg16847696	124405760	7	GPR37	TSS200	Island	0.00102884	0.0319962	1.41141e-07	0.000249255	0.00103304	0.0319962	1.5747e-07	0.000223025
cg11705975	120354248	10	PRLHR	Body	Island	0.0030708	0.494256	1.4179e-07	0.000249255	0.00264794	0.494256	3.2218e-09	1.12043e-05
cg03710354	72919704	17	OTOP2	TSS1500	Island	0.00081356	0.0595046	1.43587e-07	0.000251051	0.000784344	0.0595046	3.06817e-07	0.000360177
cg20863756	6809797	12	PIANP	5'UTR	Island	0.00136501	0.119147	1.44247e-07	0.000251051	0.00128296	0.119147	2.86363e-07	0.000346519
cg04599026	96634763	7	DLX6AS	Body	Island	0.00240584	0.165984	1.55776e-07	0.000269774	0.00219628	0.165984	1.73174e-07	0.00023945
cg18313899	118228498	6	SLC35F1	TSS200	Island	0.00108118	0.0811443	1.59659e-07	0.000275137	0.00104616	0.0811443	3.33818e-07	0.000387968
cg09969277	89922328	15	LOC254559	Body	Island	0.00103325	0.0424824	1.61853e-07	0.000277551	0.000984031	0.0424824	3.5002e-07	0.00040015
cg01166145	55093692	4	NA		N_Shore	0.0018217	0.174773	1.62971e-07	0.000278104	0.00177213	0.174773	3.2638e-07	0.000381861
cg16046561	175193478	2	NA		Island	0.000937683	0.0777199	1.67958e-07	0.000284948	0.000865675	0.0777199	2.53556e-07	0.000319066
cg01513307	108479557	6	NA		Island	0.00204852	0.191114	1.68961e-07	0.000284948	0.00194996	0.191114	3.65126e-07	0.000410709
cg10172301	47903801	1	FOXD2	1stExon	Island	0.000483477	0.051614	1.69425e-07	0.000284948	0.000477238	0.051614	2.77632e-07	0.000340783
cg21743907	129423053	7	NA		Island	0.00171401	0.118529	1.70626e-07	0.000285596	0.00169445	0.118529	2.72467e-07	0.00033562
cg23744030	61276048	11	LRRC10B	TSS1500	Island	0.000545533	0.0505884	1.73323e-07	0.000288728	0.000515937	0.0505884	3.63921e-07	0.000410674
cg23995914	10459228	4	ZNF518B	TSS200	Island	0.00433425	0.371748	1.7875e-07	0.000293748	0.00472443	0.371748	8.98211e-10	4.36413e-06
cg09107932	84853583	16	CRISPLD2	TSS200	Island	0.000459839	0.0248636	1.79055e-07	0.000293748	0.000434057	0.0248636	3.71267e-07	0.000416279
cg00094518	130418549	7	KLF14	1stExon	Island	0.00193223	0.0919487	1.79681e-07	0.000293748	0.00184022	0.0919487	3.88838e-07	0.000426412
cg18184411	53309261	1	ZYG11A	Body	Island	0.00192131	0.127826	1.79695e-07	0.000293748	0.00177158	0.127826	2.66448e-07	0.000330534
cg05942128	176972020	2	HOXD11	TSS200	Island	0.00204303	0.151908	1.90242e-07	0.000309543	0.00172006	0.151908	1.40989e-10	9.30599e-07
cg12060499	102172296	14	NA		Island	0.0032535	0.176853	1.94378e-07	0.000314808	0.00324407	0.176853	2.58611e-07	0.000323103
cg14169333	96721468	9	NA		Island	0.0011388	0.0463419	1.95489e-07	0.000315148	0.0011563	0.0463419	1.53517e-07	0.000219201
cg07570470	142318841	8	NA		Island	0.0040444	0.251034	2.04429e-07	0.000327094	0.00441481	0.251034	9.32286e-10	4.46764e-06
cg16046465	44487192	15	FRMD5	1stExon	Island	0.000703559	0.0572565	2.04769e-07	0.000327094	0.000670458	0.0572565	4.43349e-07	0.000469985
cg26381783	505235	9	KANK1	5'UTR	Island	0.00119044	0.0759655	2.07519e-07	0.000329979	0.00117568	0.0759655	3.35573e-07	0.000388715
cg00481951	187387650	3	SST	Body	N_Shore	0.00281539	0.192689	2.09861e-07	0.000332193	0.00252019	0.192689	1.18822e-07	0.000180726
cg14911690	19729395	19	PBX4	1stExon	Island	0.00265875	0.16393	2.19118e-07	0.000345285	0.00291199	0.16393	6.76382e-10	3.58509e-06
cg14594876	32031951	20	SNTA1	TSS1500	Island	0.000793362	0.0400886	2.27546e-07	0.000356958	0.000848333	0.0400886	9.46494e-09	2.31544e-05
cg09554509	27238910	7	HOXA13	1stExon	Island	0.0018725	0.20593	2.30906e-07	0.000360612	0.00165211	0.20593	6.1758e-08	0.000102879
cg20440575	68462711	5	CCNB1	TSS1500	Island	0.000743105	0.0253288	2.35729e-07	0.000366507	0.000778886	0.0253288	4.21312e-08	7.40632e-05
cg07502389	24771259	8	NEFM	TSS200	Island	0.0017174	0.167465	2.47236e-07	0.000382698	0.00157857	0.167465	3.5667e-07	0.000405106
cg13842237	47064079	21	NA		Island	0.000459033	0.0420612	2.58724e-07	0.000398715	0.000467212	0.0420612	1.8746e-07	0.000252225
cg09817427	85474313	6	TBX18	TSS1500	S_Shore	0.00141215	0.119736	2.62677e-07	0.000403031	0.00127941	0.119736	2.57056e-07	0.000322311
cg21567504	28344477	15	OCA2	TSS200	Island	0.00177421	0.179933	2.70425e-07	0.000413107	0.00179392	0.179933	2.45165e-07	0.000313011
cg26005082	4769660	19	MIR7-3	TSS1500		0.000884069	0.048036	2.75663e-07	0.000419278	0.000857714	0.048036	5.57231e-07	0.000561769
cg17143518	20716545	18	CABLES1	1stExon	Island	0.00126836	0.0733782	2.79295e-07	0.000422964	0.00114135	0.0733782	2.17764e-07	0.000282476
cg23479922	16179633	5	MARCH11	1stExon	Island	0.00575554	0.311279	2.87488e-07	0.000432178	0.00489711	0.311279	2.88292e-09	1.0616e-05
cg12563644	87956996	5	LINC00461	Body	Island	0.000844422	0.0360499	2.8785e-07	0.000432178	0.000862674	0.0360499	1.82669e-07	0.000248648
cg20461912	138664350	3	FOXL2	1stExon	Island	0.00175832	0.259277	2.9314e-07	0.000438239	0.00176093	0.259277	3.48224e-07	0.000399403
cg25410668	28241577	1	RPA2	TSS1500	S_Shore	0.00275014	0.731551	2.97037e-07	0.000442175	0.00271301	0.731551	4.85032e-07	0.000506498
cg07851675	2755540	5	NA		Island	0.00229586	0.170819	3.00602e-07	0.000443537	0.00201972	0.170819	7.76376e-08	0.000125739
cg17227967	9496556	20	LAMP5	Body	Island	0.0018225	0.0934259	3.02732e-07	0.000443537	0.0016807	0.0934259	4.80081e-07	0.000504339
cg07129924	155261402	7	NA		Island	0.00197602	0.226776	3.02976e-07	0.000443537	0.00184071	0.226776	5.64445e-07	0.000564165
cg20119148	18344195	19	PDE4C	5'UTR	Island	0.00218864	0.319578	3.03132e-07	0.000443537	0.00220837	0.319578	2.93023e-07	0.000349854
cg06055013	116853664	10	ATRNL1	1stExon	Island	0.000657397	0.0510346	3.04291e-07	0.000443537	0.000615498	0.0510346	6.00527e-07	0.000592785
cg03696327	101005121	1	GPR88	Body	Island	0.00073533	0.055257	3.085e-07	0.000447807	0.000742483	0.055257	2.91795e-07	0.00034958
cg03666741	9025298	11	NRIP3	Body	Island	0.000865717	0.0729287	3.15269e-07	0.000454325	0.000890102	0.0729287	1.55485e-07	0.000221109
cg26255807	43857904	10	NA		Island	0.00066425	0.0488122	3.15588e-07	0.000454325	0.000685946	0.0488122	1.28426e-07	0.000192909
cg03607117	53080440	3	SFMBT1	TSS1500	Island	0.00137739	0.0687476	3.2185e-07	0.00046144	0.00144185	0.0687476	6.53382e-08	0.000107816
cg02409108	79152112	11	TENM4	TSS1500	Island	0.00095253	0.0521409	3.42042e-07	0.000488389	0.000872358	0.0521409	4.76332e-07	0.000501908
cg06385324	2014621	16	SNHG9	TSS1500	Island	0.00128189	0.0768965	3.44736e-07	0.000490235	0.00142577	0.0768965	1.52587e-10	9.70528e-07
cg22682373	22697774	12	C2CD5	TSS1500	S_Shore	0.00158179	0.0969321	3.47877e-07	0.000491071	0.00149982	0.0969321	7.47181e-07	0.000710281
cg26049726	73518702	2	EGR4	Body	Island	0.000504251	0.0319427	3.48132e-07	0.000491071	0.00050406	0.0319427	4.31435e-07	0.000461174
cg13486406	113727612	7	NA		Island	0.00093944	0.0700167	3.60301e-07	0.000506196	0.00082094	0.0700167	6.66965e-08	0.000109541
cg17957186	79177895	13	POU4F1	TSS1500	Island	0.000564213	0.0375073	3.62717e-07	0.000507551	0.00052438	0.0375073	6.63324e-07	0.000642792
cg01141812	123317124	6	CLVS2	TSS1500	N_Shore	0.00199909	0.198799	3.67262e-07	0.000511864	0.00177915	0.198799	1.97081e-07	0.000262665
cg10158541	37006265	13	CCNA1	1stExon	Island	0.00109306	0.0702703	3.8004e-07	0.000527572	0.00103883	0.0702703	8.20501e-07	0.000765421
cg14901671	70589079	17	NA		Island	0.00103997	0.175278	3.81977e-07	0.000527801	0.00100944	0.175278	7.62218e-07	0.000720659
cg16015712	53308597	1	ZYG11A	1stExon	Island	0.00119188	0.0670811	3.83223e-07	0.000527801	0.00120085	0.0670811	3.86754e-07	0.000425462
cg21527132	159943985	3	LOC401097	1stExon	Island	0.000542625	0.0348616	3.9225e-07	0.000538114	0.000480823	0.0348616	1.74914e-07	0.000240904
cg10286969	2765843	16	PRSS27	Body	Island	0.0038977	0.231763	4.03639e-07	0.000551576	0.00423848	0.231763	4.27857e-09	1.32456e-05
cg26650064	2658617	17	NA		N_Shore	0.00132998	0.0969119	4.0676e-07	0.000553678	0.00119132	0.0969119	2.98561e-07	0.000352853
cg01867395	31839628	11	PAX6	TSS200	Island	0.00254566	0.258421	4.14288e-07	0.000561739	0.0021862	0.258421	1.99924e-08	4.13838e-05
cg04875128	31775895	15	OTUD7A	Body	Island	0.00458487	0.198368	4.38453e-07	0.000592209	0.00407998	0.198368	2.51249e-07	0.000318455
cg08120263	29236013	14	FOXG1	TSS1500	N_Shore	0.00311789	0.278273	4.42611e-07	0.000595197	0.00278647	0.278273	3.05279e-07	0.000359577
cg21282131	136871907	6	MAP7	TSS200	Island	0.00148957	0.0657862	4.44068e-07	0.000595197	0.00154527	0.0657862	1.50768e-07	0.000216538
cg18299578	29235928	14	FOXG1	TSS1500	N_Shore	0.00122153	0.134777	4.56052e-07	0.000608927	0.00111229	0.134777	5.80224e-07	0.000575007
cg04779720	11919376	1	NPPB	TSS1500	Island	0.000429991	0.0214422	4.6128e-07	0.00061343	0.000410648	0.0214422	9.93612e-07	0.00089126
cg01379240	138666144	3	FOXL2NB	5'UTR	Island	0.000525339	0.0247245	4.62932e-07	0.00061343	0.000485473	0.0247245	7.95074e-07	0.000743683
cg12813724	26690537	1	ZNF683	Body	S_Shelf	0.000375023	0.0285109	4.74013e-07	0.000625743	0.000394444	0.0285109	7.76191e-08	0.000125739
cg22358580	54426725	12	HOXC4	5'UTR	N_Shore	0.00175595	0.241481	4.84151e-07	0.000636724	0.00157637	0.241481	4.0725e-07	0.000441073
cg25032595	96204978	13	CLDN10	5'UTR	Island	0.00251046	0.121706	4.9099e-07	0.00064225	0.0023086	0.121706	7.81889e-07	0.000735283
cg12589298	50828905	19	KCNC3	Body	Island	0.00198818	0.113158	4.92024e-07	0.00064225	0.00215031	0.113158	9.94018e-09	2.3741e-05
cg04090392	83952774	15	BNC1	Body	Island	0.00194714	0.22862	5.04198e-07	0.000655693	0.00177279	0.22862	6.51417e-07	0.000633007
cg02078370	126988120	7	NA		Island	0.000437053	0.036803	5.20133e-07	0.000670886	0.000430684	0.036803	8.49321e-07	0.000785102
cg09286183	2042466	16	SYNGR3	Body	Island	0.000158527	0.0165264	5.21009e-07	0.000670886	0.00015985	0.0165264	5.06668e-07	0.000525951
cg27180315	75831194	7	SRRM3	TSS200	Island	0.000170621	0.0182	5.21633e-07	0.000670886	0.000174393	0.0182	3.2877e-07	0.000383374
cg24853724	28997403	7	TRIL	1stExon	Island	0.00191052	0.134842	5.30785e-07	0.000680155	0.00162382	0.134842	1.11195e-08	2.54241e-05
cg03600516	14581651	5	FAM105A	TSS1500	Island	0.00117642	0.0837628	5.62992e-07	0.000718792	0.00118673	0.0837628	5.49082e-07	0.000558534
cg12265959	11324687	8	FAM167A	TSS1500	Island	0.00114372	0.0723734	5.65547e-07	0.00071943	0.00119579	0.0723734	1.33608e-07	0.000197213
cg23428445	124405467	7	GPR37	1stExon	Island	0.000953144	0.0785382	5.72872e-07	0.000726106	0.000935795	0.0785382	9.88196e-07	0.00088868
cg03389653	49316197	16	CBLN1	TSS1500	Island	0.00216604	0.0794595	5.76694e-07	0.000727027	0.00209664	0.0794595	1.16439e-06	0.00100263
cg05917988	44281197	6	AARS2	TSS200	Island	0.00156757	0.133781	5.78892e-07	0.000727027	0.00159069	0.133781	4.73421e-07	0.000500347
cg14385280	30051183	18	GAREM	TSS1500	Island	0.000153717	0.0110212	5.79833e-07	0.000727027	0.000151904	0.0110212	8.88512e-07	0.000815812
cg02699218	132150128	5	SOWAHA	1stExon	Island	0.0032072	0.322593	5.90441e-07	0.00073726	0.00282881	0.322593	2.53035e-07	0.000319066
cg04934807	47798679	2	KCNK12	TSS1500	Island	0.000686926	0.0704456	5.92209e-07	0.00073726	0.000695545	0.0704456	5.17712e-07	0.000534245
cg22263131	94129697	6	EPHA7	TSS1500	S_Shore	0.000642048	0.0525199	6.04143e-07	0.00074945	0.000593329	0.0525199	1.0642e-06	0.000947293
cg11667020	21378045	20	NKX2-4	5'UTR	Island	0.000521368	0.0242803	6.07808e-07	0.000751332	0.000465199	0.0242803	4.37875e-07	0.000465593
cg17241310	91182856	1	BARHL2	TSS200	Island	0.00318403	0.394545	6.37069e-07	0.00078473	0.00272934	0.394545	4.04167e-08	7.22514e-05
cg07116393	20834843	1	MUL1	TSS200	Island	0.000950457	0.0376288	6.65805e-07	0.000817249	0.000972587	0.0376288	4.11797e-07	0.000443421
cg20555682	8290308	11	NA		Island	0.00109421	0.0602687	6.723e-07	0.000822335	0.00100308	0.0602687	1.05042e-06	0.000937409
cg19694200	55204351	20	TFAP2C	TSS200	Island	0.00101374	0.0630081	6.9406e-07	0.000845994	0.000934305	0.0630081	1.1911e-06	0.00101629
cg16703882	157823479	3	SHOX2	1stExon	Island	0.00169858	0.177037	7.1202e-07	0.000864871	0.00172703	0.177037	5.49232e-07	0.000558534
cg01429039	52918065	4	SPATA18	Body	Island	0.0018945	0.1151	7.20508e-07	0.000872154	0.00192139	0.1151	6.01552e-07	0.000592785
cg06217406	85007959	3	CADM2	TSS200	N_Shore	0.00108808	0.0840055	7.31443e-07	0.000882337	0.00101203	0.0840055	1.41527e-06	0.00116221
cg27006650	29236034	14	FOXG1	TSS1500	N_Shore	0.00169332	0.105381	7.41737e-07	0.00089168	0.00151848	0.105381	6.79752e-07	0.000656892
cg00048759	99775422	7	STAG3	TSS200	Island	0.00240729	0.491709	7.578e-07	0.000907871	0.00234287	0.491709	1.44409e-06	0.00117757
cg17524637	10458454	4	ZNF518B	5'UTR	Island	0.002513	0.113082	7.66355e-07	0.000914986	0.00265323	0.113082	1.10231e-07	0.000171386
cg04084157	100809049	7	VGF	TSS200	Island	0.000987041	0.144428	7.87432e-07	0.000936953	0.00103943	0.144428	1.3235e-07	0.000197019
cg03767531	182545572	2	NEUROD1	TSS200	N_Shelf	0.000636278	0.0558207	7.96512e-07	0.000944544	0.000562244	0.0558207	4.26315e-07	0.000457473
cg11908384	122852698	11	BSX	TSS1500	Island	0.000517064	0.0291445	8.05948e-07	0.000952506	0.000514749	0.0291445	1.07874e-06	0.000957796
cg21357629	47063665	21	NA		Island	0.00149487	0.0464446	8.10088e-07	0.000954175	0.00160333	0.0464446	4.06874e-08	7.22514e-05
cg10785051	133449927	5	TCF7	TSS1500	Island	0.00136716	0.105526	8.2136e-07	0.000960553	0.00141419	0.105526	3.36849e-07	0.000388906
cg06639320	106015739	2	FHL2	TSS200	Island	0.00230496	0.41803	8.21564e-07	0.000960553	0.00207751	0.41803	9.00981e-07	0.000822942
cg02998620	223171473	2	NA		S_Shore	0.000773311	0.0533037	8.2374e-07	0.000960553	0.000704364	0.0533037	1.16686e-06	0.00100263
cg04905434	144512773	8	MAFA	TSS200	Island	0.0019059	0.0898417	8.34858e-07	0.000970283	0.00165749	0.0898417	1.98223e-07	0.000262665
cg25590826	74557537	15	CCDC33	Body		0.00307753	0.362268	8.3892e-07	0.000971774	0.00256142	0.362268	1.87999e-09	7.55943e-06
cg17834755	129423218	7	NA		Island	0.00161112	0.164298	8.45678e-07	0.00097637	0.00152406	0.164298	1.81613e-06	0.00140559
cg08039301	47072907	17	NA		Island	0.00153499	0.208323	8.59354e-07	0.000988896	0.00142675	0.208323	1.66728e-06	0.00130622
cg16295725	10459219	4	ZNF518B	TSS200	Island	0.0038301	0.131247	8.66458e-07	0.000993802	0.00413784	0.131247	2.48359e-08	5.02211e-05
cg23909029	51985263	12	SCN8A	5'UTR	Island	0.000446962	0.0411065	8.71666e-07	0.000996508	0.000425665	0.0411065	1.87287e-06	0.0014368
cg19711579	182545562	2	NEUROD1	TSS200	N_Shelf	0.00111747	0.0916226	8.83452e-07	0.00100472	0.00105657	0.0916226	1.89561e-06	0.00144541
cg04525757	29235973	14	FOXG1	TSS1500	N_Shore	0.00158171	0.0798569	8.84591e-07	0.00100472	0.00137189	0.0798569	1.84669e-07	0.000250395
cg03446195	77610942	4	SHROOM3	Body	Island	0.000603092	0.0361558	8.89195e-07	0.00100668	0.000550494	0.0361558	1.32983e-06	0.00110764
cg10471976	42386190	17	RUNDC3A	1stExon	Island	0.000939142	0.0978771	8.93174e-07	0.00100792	0.000798716	0.0978771	3.87757e-08	7.10196e-05
cg14311320	124405732	7	GPR37	TSS200	Island	0.00142212	0.0930208	9.1333e-07	0.00102735	0.00141865	0.0930208	1.16937e-06	0.00100263
cg10334767	10459128	4	ZNF518B	TSS200	Island	0.00266836	0.0770649	9.21123e-07	0.0010328	0.00281394	0.0770649	1.47337e-07	0.000212985
cg18533282	52917660	4	SPATA18	1stExon	Island	0.00163646	0.117122	9.32381e-07	0.00104066	0.00160104	0.117122	1.66117e-06	0.00130589
cg08734918	94129481	6	EPHA7	TSS200	Island	0.00102276	0.0819968	9.37236e-07	0.00104066	0.00092358	0.0819968	1.11294e-06	0.000975363
cg04640886	4769592	19	MIR7-3	TSS1500		0.000627239	0.0518969	9.37247e-07	0.00104066	0.000559442	0.0518969	7.68083e-07	0.000724246
cg03554283	76319451	8	NA		Island	0.00143843	0.129176	9.4348e-07	0.00104066	0.00124339	0.129176	1.64905e-07	0.000231679
cg08782481	27839916	6	HIST1H3I	1stExon	Island	0.00194552	0.107317	9.44498e-07	0.00104066	0.00199551	0.107317	5.45568e-07	0.000558053
cg20942223	155251040	7	EN2	1stExon	Island	0.00140865	0.122044	9.45983e-07	0.00104066	0.00123492	0.122044	3.78302e-07	0.000421865
cg14674720	219827930	2	NA		Island	0.00216267	0.219691	9.5667e-07	0.00104912	0.00185965	0.219691	1.16073e-07	0.000178878
cg12189835	61335071	11	SYT7	Body	N_Shore	0.00150146	0.14748	9.69934e-07	0.00106034	0.00140374	0.14748	1.98606e-06	0.0015071
cg22282410	158380884	7	PTPRN2	TSS1500	Island	0.00249379	0.161664	9.83978e-07	0.00107234	0.0022071	0.161664	6.15107e-07	0.000602746
cg00965748	39319235	20	MAFB	TSS1500	Island	0.0014966	0.224619	9.88133e-07	0.00107352	0.00132001	0.224619	5.35869e-07	0.000549739
cg14831838	219824308	2	CDK5R2	TSS200	Island	0.000771053	0.0472521	1.00027e-06	0.00108334	0.000806943	0.0472521	2.4427e-07	0.000313011
cg03738025	105388694	6	NA		Island	0.00466408	0.24305	1.01268e-06	0.0010934	0.00388451	0.24305	3.80149e-09	1.22006e-05
cg09708488	21882013	8	NPM2	TSS1500	N_Shore	0.000516046	0.0413136	1.01738e-06	0.00109509	0.00046972	0.0413136	1.46835e-06	0.0011918
cg09105193	69327238	12	CPM	TSS1500	Island	0.00143737	0.134675	1.02398e-06	0.00109882	0.00148126	0.134675	4.97659e-07	0.000518137
cg02888131	58357987	15	ALDH1A2	TSS200	Island	0.000975888	0.0570068	1.02802e-06	0.00109978	0.000839699	0.0570068	1.39202e-07	0.000202902
cg16313026	155250213	7	EN2	TSS1500	Island	0.00111265	0.0696973	1.04795e-06	0.00111769	0.00102059	0.0696973	1.74502e-06	0.00135656
cg07850527	89268040	16	NA		Island	0.00253431	0.11483	1.0599e-06	0.001127	0.00227717	0.11483	1.13321e-06	0.000982401
cg09401099	156534380	3	NA		Island	0.00142634	0.0631589	1.0728e-06	0.00113445	0.0013771	0.0631589	2.16981e-06	0.00160817
cg02182795	57069688	8	NA		Island	0.000567112	0.0411231	1.07566e-06	0.00113445	0.000561365	0.0411231	1.59545e-06	0.0012656
cg19291355	44281188	6	AARS2	TSS200	Island	0.00095565	0.0483418	1.07664e-06	0.00113445	0.000990699	0.0483418	4.11953e-07	0.000443421
cg21725716	1725535	19	NA		Island	0.00229131	0.237915	1.09568e-06	0.00115104	0.00193544	0.237915	3.035e-08	5.89845e-05
cg04499151	100231278	7	TFR2	Body	Island	0.000634626	0.0363397	1.10782e-06	0.00116032	0.000644643	0.0363397	8.88152e-07	0.000815812
cg23193759	71389896	10	C10orf35	TSS200	Island	0.00285129	0.333533	1.11308e-06	0.00116235	0.00313709	0.333533	6.04927e-09	1.65328e-05
cg27106513	54790372	8	RGS20	Body	Island	0.0018971	0.181629	1.11739e-06	0.00116337	0.00170273	0.181629	1.17338e-06	0.00100361
cg22458194	113345686	11	DRD2	5'UTR	Island	0.00136693	0.116211	1.12463e-06	0.00116743	0.00114095	0.116211	7.24135e-09	1.90467e-05
cg12307787	48099359	20	KCNB1	TSS200	Island	0.000846264	0.0393686	1.17282e-06	0.00121385	0.000768062	0.0393686	1.63356e-06	0.00128708
cg21530890	1032260	16	SOX8	1stExon	Island	0.00146459	0.0848607	1.19657e-06	0.00123478	0.00132392	0.0848607	1.53142e-06	0.00122994
cg23967169	68981503	3	FAM19A4	1stExon	Island	0.00104335	0.0704526	1.20552e-06	0.00123696	0.000908103	0.0704526	3.78661e-07	0.000421865
cg04255416	57878497	5	RAB3C	TSS1500	N_Shore	0.00101651	0.0659394	1.20576e-06	0.00123696	0.000973242	0.0659394	2.54647e-06	0.0018143
cg04517323	98788873	8	LAPTM4B	Body	Island	0.00138498	0.132153	1.21034e-06	0.00123803	0.00125001	0.132153	1.49658e-06	0.0012119
cg08541518	69942892	6	ADGRB3	Body		0.00204987	0.176625	1.26448e-06	0.00128965	0.0018351	0.176625	1.27313e-06	0.00107578
cg01770755	41914122	15	NA		Island	0.00169711	0.169797	1.2818e-06	0.00130076	0.00147641	0.169797	4.07157e-07	0.000441073
cg04485799	50438356	22	IL17REL	Body	Island	0.00200219	0.266991	1.28282e-06	0.00130076	0.00174002	0.266991	3.85317e-07	0.000425217
cg17576288	79177877	13	POU4F1	TSS200	Island	0.000862628	0.0409882	1.33061e-06	0.00134532	0.000811856	0.0409882	2.83208e-06	0.00196575
cg04168670	124782817	2	CNTNAP5	TSS200	Island	0.00251819	0.157395	1.33725e-06	0.00134814	0.00209145	0.157395	5.75475e-09	1.59775e-05
cg14676592	49910862	16	NA		Island	0.00166441	0.326596	1.34957e-06	0.00135665	0.00153565	0.326596	2.49287e-06	0.00178338
cg11344566	124782885	2	CNTNAP5	5'UTR	Island	0.00269774	0.190854	1.38224e-06	0.00138551	0.00232702	0.190854	2.80466e-07	0.000341862
cg15406010	108478650	6	NA		Island	0.00155116	0.184459	1.42201e-06	0.0014213	0.00138195	0.184459	1.27957e-06	0.00107658
cg18279094	63790044	1	FOXD3	1stExon	Island	0.00421036	0.173791	1.44126e-06	0.00143644	0.00351662	0.173791	1.59206e-08	3.41684e-05
cg22884516	45809543	22	SMC1B	TSS200	Island	0.00168587	0.0688546	1.48097e-06	0.00147183	0.00160789	0.0688546	3.15611e-06	0.00210704
cg26433838	160167749	3	TRIM59	TSS200	Island	0.00115474	0.12366	1.49225e-06	0.00147883	0.00115215	0.12366	1.88591e-06	0.00144364
cg00645339	45670875	15	LOC145663	TSS200	Island	0.000473047	0.0191174	1.52176e-06	0.00150381	0.000485327	0.0191174	8.91541e-07	0.00081645
cg12064276	79182205	13	NA		Island	0.0020846	0.39689	1.55618e-06	0.0015335	0.00194879	0.39689	3.23318e-06	0.00214214
cg25826226	41953061	15	MGA	5'UTR	Island	0.00125069	0.0607342	1.56188e-06	0.00153479	0.00135022	0.0607342	6.05388e-08	0.00010133
cg14328457	37381475	17	STAC2	Body	Island	0.00137881	0.0945781	1.5703e-06	0.00153874	0.00124935	0.0945781	2.22283e-06	0.00163362
cg07394446	100881458	15	ADAMTS17	Body	Island	0.000789981	0.0330278	1.57867e-06	0.00154263	0.000754998	0.0330278	3.33777e-06	0.00217777
cg07392449	11324666	8	FAM167A	TSS1500	Island	0.000587202	0.0311124	1.60505e-06	0.00156291	0.000623763	0.0311124	1.89331e-07	0.000253765
cg08119884	79739863	2	CTNNA2	TSS200	Island	0.0014706	0.0473505	1.60836e-06	0.00156291	0.00126396	0.0473505	2.90885e-07	0.00034958
cg18928900	170605493	6	NA		Island	0.00176082	0.253412	1.62453e-06	0.00157222	0.00163252	0.253412	3.19148e-06	0.00211853
cg20098887	146864520	6	RAB32	TSS1500	Island	0.0012134	0.0678669	1.62693e-06	0.00157222	0.00104726	0.0678669	3.84913e-07	0.000425217
cg21581531	71665574	6	B3GAT2	1stExon	Island	0.000465323	0.0384226	1.647e-06	0.00158722	0.000432763	0.0384226	3.31451e-06	0.00217135
cg06707978	58095155	19	ZIK1	TSS1500	Island	0.00179003	0.186184	1.67128e-06	0.0016062	0.00150173	0.186184	3.98087e-08	7.17842e-05
cg18898125	24770381	8	NEFM	TSS1500	N_Shore	0.00120916	0.0751654	1.68352e-06	0.00161156	0.00109094	0.0751654	2.20521e-06	0.00163002
cg04768203	66189188	11	NPAS4	Body	Island	0.000788206	0.0624785	1.68607e-06	0.00161156	0.000806041	0.0624785	1.1085e-06	0.000974326
cg02008154	35293537	7	TBX20	1stExon	Island	0.00160901	0.171473	1.71843e-06	0.00163801	0.00141244	0.171473	9.73692e-07	0.000877893
cg03200166	61335254	11	SYT7	Body	Island	0.00222118	0.140222	1.72485e-06	0.00163967	0.00190506	0.140222	2.87259e-07	0.000346519
cg18247055	22634226	10	SPAG6	TSS200	Island	0.00269596	0.169924	1.73571e-06	0.00164552	0.00235141	0.169924	7.45269e-07	0.000710281
cg02991338	29236017	14	FOXG1	TSS1500	N_Shore	0.00211056	0.136294	1.75964e-06	0.00165475	0.00186165	0.136294	1.21356e-06	0.00103042
cg12034383	155250299	7	EN2	TSS1500	Island	0.00218687	0.127529	1.76058e-06	0.00165475	0.00189341	0.127529	5.25776e-07	0.00054097
cg27213509	176947228	2	EVX2	Body	Island	0.00149245	0.211555	1.76409e-06	0.00165475	0.00134907	0.211555	2.42654e-06	0.00175024
cg23044079	88751621	2	FOXI3	1stExon	Island	0.000929354	0.0889833	1.76437e-06	0.00165475	0.000887688	0.0889833	3.7303e-06	0.00237265
cg05009601	121944500	7	FEZF1	1stExon	Island	0.00235299	0.247088	1.79445e-06	0.00167846	0.0021376	0.247088	2.72492e-06	0.00190775
cg17380661	100912946	6	SIM1	TSS1500	Island	0.00109919	0.0513021	1.81068e-06	0.00168298	0.000977732	0.0513021	1.66906e-06	0.00130622
cg05483509	2563435	16	ATP6V0C	TSS1500	Island	0.00153677	0.166478	1.815e-06	0.00168298	0.00155721	0.166478	1.57588e-06	0.00125577
cg15909319	14201063	17	NA		N_Shore	0.00132191	0.0918038	1.82002e-06	0.00168298	0.0013266	0.0918038	2.02005e-06	0.00152298
cg17916490	11810173	2	NTSR2	1stExon	Island	0.00150159	0.0577731	1.82253e-06	0.00168298	0.00129031	0.0577731	3.58433e-07	0.000405791
cg19779211	2465491	11	KCNQ1	TSS1500	Island	0.00224678	0.164342	1.82334e-06	0.00168298	0.00212983	0.164342	3.91501e-06	0.0024677
cg20638016	122852694	11	BSX	TSS1500	Island	0.0010683	0.0510099	1.83996e-06	0.00169386	0.00107195	0.0510099	2.04798e-06	0.00153412
cg12016437	10459163	4	ZNF518B	TSS200	Island	0.00206985	0.0943512	1.87318e-06	0.00171613	0.00216122	0.0943512	5.57015e-07	0.000561769
cg26759551	97401509	9	FBP1	1stExon	Island	0.000687795	0.0487487	1.87396e-06	0.00171613	0.00067625	0.0487487	3.04878e-06	0.00205896
cg09893871	166720997	6	PRR18	1stExon	Island	0.00113745	0.0634177	1.88444e-06	0.00172122	0.00102136	0.0634177	2.26469e-06	0.00166089
cg02280532	160761244	2	LY75	5'UTR	Island	0.00133607	0.0467927	1.89954e-06	0.00173049	0.00141482	0.0467927	2.79496e-07	0.000341862
cg01445809	48099468	20	KCNB1	TSS1500	Island	0.000215634	0.0179801	1.91806e-06	0.00174282	0.000200515	0.0179801	3.86074e-06	0.00244672
cg10795666	49794635	13	MLNR	1stExon	Island	0.000565546	0.0246971	1.92595e-06	0.00174461	0.000554201	0.0246971	3.27801e-06	0.00215957
cg04747634	71264451	16	HYDIN	5'UTR	Island	0.0016521	0.0648972	1.93145e-06	0.00174461	0.00137614	0.0648972	2.50527e-08	5.03684e-05
cg20974724	121944450	7	FEZF1	1stExon	Island	0.00185162	0.16517	1.93615e-06	0.00174461	0.00157501	0.16517	1.97934e-07	0.000262665
cg01579289	71503740	2	NA		Island	0.00129197	0.0471143	1.93997e-06	0.00174461	0.00131814	0.0471143	1.38067e-06	0.00114183
cg02571816	38747378	19	PPP1R14A	TSS1500	Island	0.00218912	0.109956	1.94799e-06	0.00174733	0.00193621	0.109956	1.53507e-06	0.00122994
cg13640100	33896928	1	NA		Island	0.000926176	0.0683125	1.96476e-06	0.00175786	0.000873091	0.0683125	4.2085e-06	0.00258866
cg11930114	87972127	5	LINC00461	Body	N_Shore	0.000867284	0.0454907	1.98103e-06	0.0017679	0.000857984	0.0454907	2.92153e-06	0.00200791
cg03060802	75234078	8	JPH1	TSS1500	Island	0.000264728	0.0219461	1.99791e-06	0.00177842	0.000254648	0.0219461	4.05378e-06	0.00253183
cg24061141	35293869	7	TBX20	TSS200	Island	0.00132954	0.0818391	2.01387e-06	0.00178808	0.00122121	0.0818391	3.64785e-06	0.00232443
cg23478098	87972122	5	LINC00461	Body	N_Shore	0.00184001	0.158653	2.03435e-06	0.00180169	0.00173603	0.158653	4.36322e-06	0.00264878
cg07829379	35294198	17	LHX1	TSS1500	Island	0.00157562	0.143012	2.04858e-06	0.00180971	0.00149411	0.143012	4.39283e-06	0.00265869
cg25090514	2038743	5	NA		Island	0.00286056	0.213052	2.06724e-06	0.0018216	0.00299419	0.213052	5.57051e-07	0.000561769
cg19734870	87956883	5	LINC00461	Body	Island	0.00089718	0.0761494	2.0765e-06	0.00182516	0.000877268	0.0761494	3.62695e-06	0.00231533
cg22088594	37634133	13	SUPT20H	TSS1500	S_Shore	0.0021572	0.176589	2.08296e-06	0.00182625	0.00219848	0.176589	1.53644e-06	0.00122994
cg01158574	11809997	2	NTSR2	1stExon	Island	0.00110755	0.134312	2.09636e-06	0.00182702	0.00101171	0.134312	3.54656e-06	0.00228066
cg26272477	100437554	14	NA		Island	0.00094703	0.0738559	2.09693e-06	0.00182702	0.000835987	0.0738559	1.58745e-06	0.00126211
cg26228351	200992656	1	KIF21B	5'UTR	Island	0.000293804	0.0128008	2.1003e-06	0.00182702	0.000300182	0.0128008	1.429e-06	0.00116799
cg09046055	166720749	6	PRR18	1stExon	Island	0.00175516	0.123198	2.10473e-06	0.00182702	0.00151385	0.123198	5.7346e-07	0.000571542
cg17592231	43604758	11	NA		S_Shore	0.0021528	0.459421	2.11072e-06	0.00182768	0.00182492	0.459421	1.80001e-07	0.000245973
cg05871694	177053503	2	HOXD1	1stExon	Island	0.00168012	0.131573	2.13638e-06	0.00184534	0.0014562	0.131573	7.60061e-07	0.000720567
cg23486142	20767607	13	GJB2	TSS1500	Island	0.000824006	0.0502265	2.15207e-06	0.00184987	0.000829419	0.0502265	2.22184e-06	0.00163362
cg19922137	210111561	1	SYT14	1stExon	Island	0.00282039	0.14142	2.1522e-06	0.00184987	0.00242391	0.14142	4.84635e-07	0.000506498
cg04162059	64784177	12	C12orf56	1stExon	Island	0.000909491	0.0735114	2.2715e-06	0.00194762	0.000853409	0.0735114	4.82489e-06	0.00284633
cg24478096	160761085	2	LY75	Body	Island	0.000466551	0.0226807	2.3092e-06	0.00197511	0.000478601	0.0226807	1.38826e-06	0.00114412
cg19078576	17217877	5	BASP1	5'UTR	Island	0.00294942	0.126343	2.3352e-06	0.00199247	0.00265772	0.126343	3.17116e-06	0.00210904
cg24719321	122850490	11	BSX	Body	N_Shore	0.00203544	0.177921	2.3802e-06	0.00202117	0.00177163	0.177921	1.09804e-06	0.00096756
cg27482605	55677760	19	DNAAF3	Body	Island	0.000593848	0.0381445	2.38039e-06	0.00202117	0.000555944	0.0381445	5.02082e-06	0.00293894
cg15603424	13300592	11	ARNTL	5'UTR	Island	0.000935393	0.0424247	2.44786e-06	0.00207119	0.000933703	0.0424247	3.03924e-06	0.00205649
cg04304705	48884960	22	FAM19A5	TSS1500	Island	0.0020249	0.183579	2.45114e-06	0.00207119	0.00181367	0.183579	2.94576e-06	0.00201664
cg23217622	156405438	1	NA		Island	0.00101664	0.042955	2.46162e-06	0.00207504	0.000969137	0.042955	5.2056e-06	0.00303004
cg20992114	111542825	4	PITX2	Body	Island	0.00142484	0.278659	2.4933e-06	0.00209668	0.00128235	0.278659	3.34299e-06	0.00217777
cg04749646	217236630	2	MARCH4	5'UTR	Island	0.000944519	0.066428	2.54427e-06	0.00213442	0.000840438	0.066428	2.61353e-06	0.00185539
cg16819369	231729734	2	ITM2C	5'UTR	Island	0.000572579	0.0668652	2.56275e-06	0.00214455	0.000569237	0.0668652	3.43791e-06	0.00222305
cg26118408	126987840	7	NA		Island	0.000733968	0.0337353	2.56861e-06	0.00214455	0.00077213	0.0337353	5.64323e-07	0.000564165
cg11589520	14200790	17	NA		Island	0.000659686	0.0541876	2.60074e-06	0.00216214	0.00060824	0.0541876	4.99852e-06	0.00293391
cg07005055	113052167	1	WNT2B	Body	Island	0.00215436	0.11347	2.60203e-06	0.00216214	0.00218923	0.11347	2.09992e-06	0.00156299
cg12206199	39187543	2	LOC375196	TSS200	Island	0.000434726	0.0185141	2.62061e-06	0.00217241	0.000415866	0.0185141	5.45331e-06	0.00312228
cg10791926	172949284	2	DLX1	TSS1500	Island	0.00103043	0.144282	2.71716e-06	0.00224712	0.000963356	0.144282	5.72051e-06	0.00322122
cg05758246	10404967	6	TFAP2A	Body	Island	0.00084581	0.0539483	2.76037e-06	0.00227748	0.000781837	0.0539483	5.44394e-06	0.00312202
cg24051481	95364062	13	SOX21	1stExon	Island	0.00155194	0.133249	2.8113e-06	0.00231404	0.0013766	0.133249	2.72672e-06	0.00190775
cg13649056	136474626	9	NA		Island	0.00190501	0.186211	2.83427e-06	0.00232598	0.00161273	0.186211	2.96522e-07	0.000351631
cg08186362	60794868	20	HRH3	1stExon	Island	0.00111997	0.0360859	2.8391e-06	0.00232598	0.00103548	0.0360859	5.61819e-06	0.00320096
cg08540945	152591698	7	NA		Island	0.00102222	0.0722743	2.84747e-06	0.00232738	0.000972381	0.0722743	6.04306e-06	0.00332917
cg20051033	9746059	3	CPNE9	Body	Island	0.000970794	0.0644801	2.87644e-06	0.00234558	0.000836796	0.0644801	9.32407e-07	0.000849427
cg19744587	53880376	3	IL17RB	TSS200	Island	0.00062033	0.0414069	2.92112e-06	0.00237012	0.000563538	0.0414069	4.74256e-06	0.00282635
cg16086373	5890838	18	TMEM200C	1stExon	Island	0.000699298	0.0371072	2.9231e-06	0.00237012	0.000679746	0.0371072	5.39234e-06	0.0031026
cg24849872	16472123	17	ZNF287	5'UTR	Island	0.00201633	0.18193	2.9365e-06	0.00237012	0.00186078	0.18193	5.73662e-06	0.00322122
cg02381192	1452425	7	NA		Island	0.00197842	0.208108	2.93832e-06	0.00237012	0.00178065	0.208108	4.06741e-06	0.00253183
cg11075316	160167725	3	TRIM59	TSS200	Island	0.000503623	0.0259563	2.94041e-06	0.00237012	0.000518278	0.0259563	1.61036e-06	0.00127454
cg05176991	24128116	18	KCTD1	5'UTR	Island	0.000865062	0.0506421	2.94999e-06	0.00237237	0.000793327	0.0506421	5.42343e-06	0.00311537
cg27506082	207139431	2	ZDBF2	TSS200	Island	0.000384447	0.0260093	2.95857e-06	0.00237382	0.000386919	0.0260093	3.05791e-06	0.00206115
cg07011172	159343549	5	ADRA1B	TSS200	Island	0.000898769	0.032629	3.03999e-06	0.00243253	0.000827355	0.032629	5.81967e-06	0.00325469
cg15581269	88650618	2	NA		Island	0.00170408	0.183662	3.04565e-06	0.00243253	0.00154252	0.183662	4.70221e-06	0.0028167
cg27176138	96743087	13	HS6ST3	TSS200	Island	0.00161607	0.107524	3.07695e-06	0.00245193	0.00140659	0.107524	1.6167e-06	0.00127666
cg13347071	210636748	2	UNC80	1stExon	Island	0.00127199	0.161652	3.0896e-06	0.00245641	0.00113051	0.161652	3.24795e-06	0.00214786
cg22557662	38747374	19	PPP1R14A	TSS1500	Island	0.00122535	0.060216	3.12238e-06	0.00247685	0.00108749	0.060216	3.16888e-06	0.00210904
cg11931116	54074040	10	DKK1	5'UTR	Island	0.0015517	0.155263	3.21577e-06	0.00254516	0.00135309	0.155263	1.85987e-06	0.00143311
cg12920180	31344444	14	COCH	Body	Island	0.0010508	0.0593783	3.25787e-06	0.00257266	0.000994825	0.0593783	6.96499e-06	0.00373654
cg14521746	77185492	11	PAK1	TSS1500	Island	0.000603777	0.0468305	3.28692e-06	0.00258975	0.000625197	0.0468305	1.45823e-06	0.00118634
cg00830285	149119905	7	NA		Island	0.00201605	0.181515	3.38504e-06	0.00266107	0.00218902	0.181515	1.17234e-07	0.000179875
cg00930873	58357973	15	ALDH1A2	TSS200	Island	0.0010687	0.0866815	3.39589e-06	0.00266303	0.000973608	0.0866815	5.84638e-06	0.0032619
cg03553786	13692202	3	LOC285375	TSS200		0.00220114	0.0997248	3.40276e-06	0.00266303	0.00225173	0.0997248	2.27791e-06	0.00166709
cg03631131	147115506	3	ZIC4	Body	N_Shore	0.00154393	0.149149	3.41091e-06	0.00266345	0.00128693	0.149149	1.17941e-07	0.000180169
cg12422450	93389891	14	CHGA	Body	Island	0.00128141	0.0813683	3.43914e-06	0.0026738	0.0011064	0.0813683	1.35252e-06	0.00112386
cg14419975	91196332	1	NA		S_Shelf	0.00186327	0.131205	3.44601e-06	0.0026738	0.00196401	0.131205	7.25725e-07	0.000695554
cg12627071	237072673	2	NA		Island	0.00181255	0.16374	3.44709e-06	0.0026738	0.00150595	0.16374	8.69717e-08	0.000138927
cg08209133	48485624	4	SLC10A4	1stExon	Island	0.0012863	0.138164	3.48066e-06	0.00269386	0.00112603	0.138164	2.40458e-06	0.00174341
cg00088042	103892309	10	PPRC1	TSS1500	N_Shore	0.000624979	0.0394285	3.53105e-06	0.00272683	0.000638072	0.0394285	2.51041e-06	0.00179226
cg06493994	25652602	6	SCGN	1stExon	Island	0.00162922	0.183722	3.57782e-06	0.00275686	0.00140882	0.183722	1.54146e-06	0.00123115
cg25139493	39957400	1	BMP8A	1stExon	Island	0.00112336	0.0781804	3.5896e-06	0.00275986	0.00107835	0.0781804	7.28133e-06	0.00382957
cg12892303	42733592	17	C17orf104	TSS200	Island	0.00174252	0.110789	3.61188e-06	0.0027709	0.00167272	0.110789	7.3259e-06	0.00383409
cg03451670	236579469	2	AGAP1	Body	Island	0.0046848	0.256326	3.62317e-06	0.00277348	0.0044068	0.256326	7.75453e-06	0.00397179
cg06458239	58038573	19	ZNF549	TSS200	Island	0.00476422	0.297802	3.63981e-06	0.00278013	0.00477121	0.297802	4.20016e-06	0.00258866
cg11229185	22625274	10	NA		Island	0.00182851	0.170385	3.65205e-06	0.00278341	0.0019571	0.170385	3.42548e-07	0.000394185
cg06142537	71114785	2	NA		Island	0.00177548	0.166551	3.67697e-06	0.0027963	0.00160814	0.166551	5.88992e-06	0.00328097
cg09547099	167718982	5	WWC1	TSS200	Island	0.000215963	0.0135738	3.70948e-06	0.00280949	0.000200556	0.0135738	7.59914e-06	0.00393251
cg01016660	7660925	19	CAMSAP3	1stExon	Island	0.000495442	0.0486583	3.71037e-06	0.00280949	0.000458461	0.0486583	7.47913e-06	0.00388189
cg23517605	3228365	6	TUBB2B	TSS1500	Island	0.00113585	0.128562	3.87166e-06	0.0029211	0.00100939	0.128562	4.31177e-06	0.00263241
cg08097882	79177516	13	POU4F1	5'UTR	Island	0.000851164	0.0583688	3.87694e-06	0.0029211	0.000773096	0.0583688	6.50883e-06	0.00353017
cg21322436	145812842	7	CNTNAP2	TSS1500	N_Shore	0.00206549	0.191614	3.88283e-06	0.0029211	0.0017894	0.191614	1.8965e-06	0.00144541
cg25547361	76926079	5	OTP	3'UTR	Island	0.0005501	0.0629863	3.90384e-06	0.00293061	0.000543146	0.0629863	5.82414e-06	0.00325469
cg00464519	37034655	9	PAX5	TSS200	Island	0.0011424	0.119025	3.92369e-06	0.00293921	0.00115851	0.119025	3.37187e-06	0.00218844
cg17555825	76924190	5	NA		Island	0.00173056	0.161019	3.96263e-06	0.00296204	0.00155586	0.161019	5.67392e-06	0.00321179
cg23082387	7135565	1	CAMTA1	Body		0.00113245	0.0801548	3.99658e-06	0.00298104	0.000963164	0.0801548	7.8638e-07	0.000737524
cg08376141	32116591	6	PRRT1	3'UTR	Island	0.0027247	0.527279	4.16239e-06	0.00309811	0.0026795	0.527279	6.58408e-06	0.00356545
cg07357987	223289306	2	SGPP2	TSS200	Island	0.00114077	0.0749974	4.18103e-06	0.00310538	0.00107198	0.0749974	8.94054e-06	0.00443008
cg27345757	123602795	3	MYLK	5'UTR	Island	0.00220825	0.157004	4.20855e-06	0.0031192	0.00207552	0.157004	9.00222e-06	0.00444804
cg17651959	21498100	20	NA		S_Shore	0.00084347	0.0411231	4.24028e-06	0.00313607	0.000770146	0.0411231	7.67255e-06	0.00395296
cg18514922	160761262	2	LY75	TSS200	Island	0.00122063	0.0500313	4.25722e-06	0.00314195	0.00130842	0.0500313	3.82401e-07	0.000424679
cg21296230	33010536	15	GREM1	5'UTR	Island	0.00223171	0.158608	4.28165e-06	0.00314961	0.00191115	0.158608	1.29955e-06	0.00109021
cg02927519	151513141	1	TUFT1	Body	Island	0.0010948	0.077836	4.2856e-06	0.00314961	0.00103868	0.077836	9.09253e-06	0.00447113
cg25148733	49716596	12	TROAP	TSS1500	N_Shore	0.000419502	0.0488164	4.33399e-06	0.0031785	0.00040982	0.0488164	7.45247e-06	0.00387514
cg21841963	54388539	12	NA		Island	0.00139577	0.0930708	4.38743e-06	0.00321096	0.00123797	0.0930708	4.81915e-06	0.00284633
cg21384645	176957304	2	HOXD13	TSS1500	Island	0.00103542	0.0816121	4.44913e-06	0.003249	0.00091309	0.0816121	4.22532e-06	0.00258866
cg25743481	44803289	3	KIF15	1stExon	Island	0.00159531	0.116008	4.45799e-06	0.003249	0.00178119	0.116008	1.34328e-08	2.99974e-05
cg00702638	44803293	3	KIF15	1stExon	Island	0.00147066	0.0694868	4.52484e-06	0.00328726	0.00160871	0.0694868	1.0095e-07	0.000158364
cg21462428	4381448	12	CCND2	TSS1500	Island	0.00121825	0.0542727	4.52928e-06	0.00328726	0.00136343	0.0542727	1.04501e-08	2.4535e-05
cg04431629	50890341	1	DMRTA2	TSS1500	Island	0.00201113	0.138986	4.54306e-06	0.00329043	0.0021284	0.138986	8.3053e-07	0.000772715
cg04713453	17217093	5	LOC285696	Body	N_Shore	0.000288844	0.0234	4.61426e-06	0.0033351	0.000264081	0.0234	8.50685e-06	0.00428806
cg01281911	47882686	1	FOXE3	1stExon	Island	0.00178515	0.0750091	4.70589e-06	0.00339432	0.00156044	0.0750091	3.50044e-06	0.00225515
cg01713485	119613275	2	NA		Island	0.000307322	0.0264107	4.77338e-06	0.00343591	0.00030209	0.0264107	7.54393e-06	0.00390972
cg19764599	75601276	1	LHX8	Body	Island	0.000570483	0.028686	4.80711e-06	0.00344895	0.000562626	0.028686	7.25358e-06	0.00382152
cg07131451	113437276	4	NEUROG2	1stExon	Island	0.000769916	0.0587778	4.81121e-06	0.00344895	0.000826978	0.0587778	3.96949e-07	0.000433947
cg23889391	46138699	6	ENPP5	1stExon		0.000619429	0.0246626	4.8356e-06	0.00345934	0.000629863	0.0246626	3.88308e-06	0.00245643
cg10658666	63276718	2	OTX1	TSS1500	Island	0.00166086	0.252981	4.93118e-06	0.00352052	0.00156674	0.252981	1.05392e-05	0.0049642
cg18097850	40005602	19	SELV	TSS200	N_Shore	0.00102346	0.130633	4.96783e-06	0.00353946	0.000893046	0.130633	3.56247e-06	0.00228669
cg10173275	77783551	17	NA		N_Shore	0.000296434	0.0281193	4.99224e-06	0.0035471	0.000301552	0.0281193	3.95868e-06	0.00249073
cg09366312	5891001	18	TMEM200C	1stExon	Island	0.000763899	0.0401414	4.99882e-06	0.0035471	0.000702634	0.0401414	9.81164e-06	0.00475397
cg08009622	75916327	6	COL12A1	TSS1500	Island	0.00167131	0.107435	5.02602e-06	0.00355918	0.00159244	0.107435	1.0486e-05	0.00495045
cg07589899	62020677	2	NA			0.0031963	0.496612	5.04386e-06	0.00356459	0.00332097	0.496612	2.05581e-06	0.0015367
cg25324047	22765840	10	NA		Island	0.00162756	0.0963515	5.12396e-06	0.00361158	0.00146825	0.0963515	8.09709e-06	0.00411711
cg17218713	71513114	1	PTGER3	1stExon	Island	0.00091807	0.0559306	5.1328e-06	0.00361158	0.000804214	0.0559306	4.2199e-06	0.00258866
cg26486663	2040863	16	SYNGR3	Body	N_Shore	0.000647317	0.0617035	5.14725e-06	0.00361158	0.000651856	0.0617035	5.25086e-06	0.00304625
cg20040743	91803792	8	NECAB1	TSS200	Island	0.00144991	0.123448	5.1589e-06	0.00361158	0.0012133	0.123448	4.32401e-07	0.000461174
cg03107659	40834984	17	CCR10	TSS1500	Island	0.000499124	0.0190545	5.16519e-06	0.00361158	0.000436432	0.0190545	4.02116e-06	0.00252098
cg14566959	140772681	5	PCDHGA4	Body	Island	0.00273527	0.687809	5.17229e-06	0.00361158	0.00248854	0.687809	9.16585e-06	0.00449713
cg17092519	70964256	11	NA		S_Shore	0.00109849	0.0820814	5.22227e-06	0.0036326	0.000943782	0.0820814	2.10903e-06	0.00156644
cg01693650	45883855	3	LZTFL1	TSS1500	Island	0.0012815	0.0729756	5.22317e-06	0.0036326	0.00132622	0.0729756	2.46098e-06	0.00176417
cg03943826	72612556	15	CELF6	TSS200	Island	0.000456094	0.0445191	5.238e-06	0.00363569	0.000474571	0.0445191	2.02827e-06	0.00152589
cg22546696	41952645	15	MGA	1stExon	Island	0.000802634	0.0387173	5.3237e-06	0.00368786	0.000795399	0.0387173	7.42451e-06	0.00387077
cg07150445	29235448	14	FOXG1	TSS1500	Island	0.000915622	0.0943567	5.36397e-06	0.00370407	0.000805971	0.0943567	5.14475e-06	0.00299961
cg26921969	92948217	5	NA			0.00219649	0.28152	5.36828e-06	0.00370407	0.00204799	0.28152	1.13426e-05	0.00524166
cg23434413	46690706	17	HOXB8	Body	Island	0.000424488	0.0408911	5.408e-06	0.00372413	0.000419552	0.0408911	7.85982e-06	0.00401385
cg00631482	21949221	1	RAP1GAP	Body	Island	0.000769056	0.0500628	5.4225e-06	0.00372678	0.000743477	0.0500628	1.03026e-05	0.00488514
cg06685391	81903146	14	NA		Island	0.0010454	0.0814857	5.52954e-06	0.00379289	0.000985853	0.0814857	1.18074e-05	0.0053994
cg04269188	105767882	14	BRF1	TSS1500	Island	0.000503172	0.0339383	5.55191e-06	0.00380079	0.000529875	0.0339383	1.32735e-06	0.00110764
cg01850269	100903227	6	SIM1	Body	N_Shore	0.00190495	0.222256	5.58982e-06	0.00381926	0.00164596	0.222256	2.97368e-06	0.00202387
cg22363783	94129243	6	EPHA7	1stExon	Island	0.000964423	0.0645371	5.67434e-06	0.00386945	0.000830188	0.0645371	2.61537e-06	0.00185539
cg16778903	72612567	15	CELF6	TSS200	Island	0.000363489	0.0346178	5.70222e-06	0.00388091	0.000362419	0.0346178	7.11912e-06	0.00377341
cg14679587	56882324	12	GLS2	TSS200	Island	0.00122105	0.0576986	5.7932e-06	0.00393517	0.00104829	0.0576986	2.41136e-06	0.00174341
cg00399175	26395448	2	GAREML	TSS1500	Island	0.00103504	0.0716811	5.82147e-06	0.00394671	0.00106353	0.0716811	3.49018e-06	0.00225269
cg19965221	30114474	15	TJP1	5'UTR	Island	0.00172199	0.0573396	5.94511e-06	0.00402273	0.00146122	0.0573396	1.42218e-06	0.00116514
cg08874512	51831274	19	IGLON5	Body	S_Shore	0.00117897	0.0897344	5.96481e-06	0.00402827	0.00108774	0.0897344	1.20694e-05	0.00546404
cg21638161	144512759	8	MAFA	TSS200	Island	0.00170972	0.0870886	5.99055e-06	0.00402853	0.00150165	0.0870886	5.61302e-06	0.00320096
cg10432620	74808963	16	FA2H	TSS1500	Island	0.000715021	0.0653147	5.99776e-06	0.00402853	0.00071874	0.0653147	6.36367e-06	0.00346249
cg24079702	106015771	2	FHL2	TSS200	Island	0.00248206	0.282539	6.00049e-06	0.00402853	0.0023347	0.282539	1.28262e-05	0.00567818
cg26435572	27223682	7	HOXA11-AS	TSS1500	N_Shore	0.00140625	0.0808737	6.01125e-06	0.00402853	0.00133282	0.0808737	1.2711e-05	0.00565305
cg10190863	139077047	5	NA		Island	0.00110739	0.0329961	6.05328e-06	0.00404894	0.00100075	0.0329961	1.00391e-05	0.00481333
cg15543566	87515467	4	PTPN13	5'UTR	Island	0.00125803	0.0645444	6.07278e-06	0.00405423	0.00114204	0.0645444	1.06688e-05	0.00501643
cg09115646	2978687	10	NA			-0.000539983	0.975843	6.12322e-06	0.00408012	-0.000532254	0.975843	9.24469e-06	0.00452312
cg11141380	122852417	11	BSX	TSS200	Island	0.00179795	0.115432	6.2236e-06	0.00413912	0.0015136	0.115432	9.70228e-07	0.000877031
cg04044664	132150117	5	SOWAHA	1stExon	Island	0.00163722	0.199701	6.25154e-06	0.00414981	0.00142689	0.199701	4.74253e-06	0.00282635
cg11201710	192232468	3	FGF12	Body	Island	0.00218316	0.217367	6.28133e-06	0.00416169	0.00182088	0.217367	5.16988e-07	0.000534245
cg02232208	147137147	3	NA		Island	0.00147379	0.144057	6.30682e-06	0.00417068	0.00127747	0.144057	4.00544e-06	0.00251563
cg06942701	162280009	2	TBR1	Body	Island	0.00192003	0.262046	6.38516e-06	0.00421452	0.00175322	0.262046	1.19876e-05	0.00544815
cg16319578	65007512	14	HSPA2	1stExon	Island	0.0024639	0.148533	6.43787e-06	0.00424038	0.00219169	0.148533	8.29188e-06	0.00418573
cg08160331	75140865	11	KLHL35	1stExon	Island	0.00229155	0.479251	6.44858e-06	0.00424038	0.00215724	0.479251	1.37724e-05	0.00595396
cg09276565	99281178	6	POU3F2	TSS1500	Island	0.000549347	0.0456457	6.48363e-06	0.00425543	0.000502527	0.0456457	1.23768e-05	0.0055652
cg11932564	42322146	22	TNFRSF13C	Body	Island	0.000479216	0.0261771	6.49938e-06	0.00425777	0.00049934	0.0261771	2.44405e-06	0.00175924
cg07133099	84853665	16	CRISPLD2	1stExon	Island	0.00136337	0.0934601	6.526e-06	0.00426722	0.00126134	0.0934601	1.34503e-05	0.00587424
cg02119363	179754603	3	PEX5L	TSS200	Island	0.000752215	0.0291004	6.568e-06	0.00428668	0.000678534	0.0291004	1.07386e-05	0.0050357
cg15092561	45554033	21	C21orf33	Body	Island	0.00160748	0.109596	6.65217e-06	0.00433352	0.00162566	0.109596	6.15897e-06	0.00337178
cg03160135	117586918	6	VGLL2	1stExon	Island	0.00127605	0.135503	6.67308e-06	0.00433906	0.00109331	0.135503	2.77633e-06	0.00193472
cg12042113	90039913	15	RHCG	TSS200	Island	0.000729344	0.0557313	6.73835e-06	0.00437337	0.000655733	0.0557313	1.05435e-05	0.0049642
cg09226692	43422490	6	DLK2	Body	Island	0.00112695	0.111167	6.81975e-06	0.00441801	0.00122179	0.111167	3.54646e-07	0.000404118
cg06407634	33460576	20	GGT7	1stExon	Island	0.000866822	0.0474242	6.86938e-06	0.00444102	0.00092901	0.0474242	7.19571e-07	0.000691551
cg04834794	128400154	3	NA		Island	0.000692347	0.0440007	6.89017e-06	0.00444102	0.00072358	0.0440007	2.33077e-06	0.00170222
cg08153345	2862084	12	NA		Island	0.000630117	0.0454109	6.89336e-06	0.00444102	0.000615834	0.0454109	1.16086e-05	0.0053364
cg09911521	5828301	19	NRTN	3'UTR	Island	0.000657199	0.0630296	6.93443e-06	0.00445855	0.000672193	0.0630296	4.79625e-06	0.00284633
cg18468088	35490818	6	NA			0.00108775	0.0659378	6.94605e-06	0.00445855	0.00104664	0.0659378	1.35796e-05	0.00591592
cg04271792	28831393	6	NA		N_Shore	0.00180366	0.101629	6.98571e-06	0.00446772	0.00197154	0.101629	2.06424e-07	0.00026945
cg00135852	46703646	17	HOXB9	1stExon	Island	0.000837102	0.0884927	6.99322e-06	0.00446772	0.000811068	0.0884927	1.29062e-05	0.00569348
cg24338780	174968123	1	CACYBP	TSS1500	N_Shore	0.00185756	0.202129	7.00838e-06	0.00446772	0.00195371	0.202129	1.83998e-06	0.00142091
cg04989913	61115132	14	SIX1	Body	Island	0.000722681	0.0740821	7.01142e-06	0.00446772	0.000652468	0.0740821	1.17027e-05	0.00536556
cg17246140	43020264	2	HAAO	TSS1500	Island	0.00177091	0.0788989	7.0944e-06	0.00450949	0.00163947	0.0788989	1.47071e-05	0.0061838
cg00252781	179334658	1	AXDND1	TSS1500	N_Shore	0.00211268	0.218456	7.11199e-06	0.00450949	0.00235489	0.218456	3.83561e-08	7.10196e-05
cg02311152	71276396	14	MAP3K9	TSS1500	Island	0.000910384	0.0603331	7.11565e-06	0.00450949	0.000948752	0.0603331	2.69108e-06	0.00189419
cg26856607	19325920	19	NCAN	5'UTR	S_Shelf	0.00181308	0.14215	7.13725e-06	0.004515	0.00146337	0.14215	1.91361e-08	3.9847e-05
cg22111038	57879168	5	RAB3C	Body	Island	0.00071206	0.0681591	7.18697e-06	0.00453825	0.000642295	0.0681591	1.18909e-05	0.00542338
cg02498311	73020358	11	ARHGEF17	1stExon	Island	0.000703255	0.0359619	7.22357e-06	0.00455314	0.000633911	0.0359619	1.18479e-05	0.00541085
cg07671586	131754122	3	CPNE4	TSS1500	Island	0.00129807	0.0668054	7.2462e-06	0.00455919	0.00122815	0.0668054	1.53361e-05	0.00631331
cg18708460	100051339	6	NA		Island	0.00113676	0.206031	7.33062e-06	0.00460403	0.00101442	0.206031	1.03058e-05	0.00488514
cg19055803	12947164	19	RTBDN	TSS1500	N_Shore	0.00073369	0.0710003	7.35984e-06	0.00461409	0.000703475	0.0710003	1.47024e-05	0.0061838
cg10738239	95363371	13	SOX21	1stExon	Island	0.000721986	0.0625855	7.37994e-06	0.00461841	0.000642355	0.0625855	9.83094e-06	0.00475673
cg08261837	57878745	5	RAB3C	TSS200	Island	0.000419753	0.0410916	7.43611e-06	0.00464526	0.000409833	0.0410916	1.26252e-05	0.00564788
cg14577472	42295538	20	MYBL2	TSS200	Island	0.000295752	0.0209743	7.45573e-06	0.00464921	0.000306135	0.0209743	3.58346e-06	0.00229175
cg13690424	54789193	18	NA		Island	0.0011241	0.0974211	7.49711e-06	0.0046667	0.000909531	0.0974211	3.34286e-08	6.39027e-05
cg07553761	160167977	3	TRIM59	TSS1500	Island	0.00204471	0.228887	7.54767e-06	0.00468983	0.00195696	0.228887	1.52348e-05	0.00628483
cg20777920	10404848	6	TFAP2A	Body	Island	0.000476653	0.0308029	7.69084e-06	0.00476445	0.000495197	0.0308029	3.27711e-06	0.00215957
cg19014941	88127363	10	GRID1	TSS1500	Island	0.00123191	0.108014	7.70399e-06	0.00476445	0.00112571	0.108014	1.47699e-05	0.0061953
cg19389953	121939827	7	NA		N_Shore	0.00139377	0.116591	7.70863e-06	0.00476445	0.00122961	0.116591	8.71088e-06	0.00434087
cg20359994	27599141	6	NA		Island	0.00134591	0.103155	7.7362e-06	0.00476835	0.00122097	0.103155	1.38377e-05	0.00596156
cg00727630	50721366	20	ZFP64	Body	Island	0.000964224	0.0718236	7.74221e-06	0.00476835	0.000874455	0.0718236	1.3803e-05	0.00595396
cg06829968	53076235	15	ONECUT1	Body	Island	0.000866349	0.0711912	7.83647e-06	0.00481793	0.000832361	0.0711912	1.5417e-05	0.00632269
cg02583418	105473340	2	POU3F3	1stExon	Island	0.000747642	0.0349726	7.88261e-06	0.00483779	0.000694816	0.0349726	1.66037e-05	0.00666866
cg05144345	1686368	4	FAM53A	TSS1500	Island	0.00175227	0.24946	7.94201e-06	0.00486571	0.00174508	0.24946	1.00801e-05	0.00481589
cg21487207	54410576	12	HOXC4	TSS200	N_Shore	0.00141541	0.112925	8.0623e-06	0.00492422	0.00139864	0.112925	1.16351e-05	0.00534153
cg10852320	36693389	5	NA		S_Shelf	0.00120265	0.140512	8.06567e-06	0.00492422	0.00122431	0.140512	6.36426e-06	0.00346249
cg18582824	124782586	2	CNTNAP5	TSS1500	Island	0.00146603	0.12594	8.15665e-06	0.00495968	0.00127066	0.12594	5.81003e-06	0.00325469
cg23346462	179754533	3	PEX5L	TSS200	Island	0.000445885	0.0271092	8.16228e-06	0.00495968	0.000433923	0.0271092	1.43236e-05	0.00608842
cg11117266	43971461	17	MAPT	TSS1500	Island	0.00123731	0.0758763	8.16628e-06	0.00495968	0.00120726	0.0758763	1.39403e-05	0.00597039
cg13689681	99382204	9	CDC14B	TSS200	Island	0.000842621	0.0581594	8.20729e-06	0.00497262	0.000785643	0.0581594	1.74285e-05	0.00688921
cg14535980	106681937	2	C2orf40	TSS200	N_Shore	0.00218094	0.197093	8.21601e-06	0.00497262	0.00187389	0.197093	4.3277e-06	0.00263753
cg02159381	122852523	11	BSX	TSS200	Island	0.000931221	0.103516	8.35516e-06	0.00503972	0.000843922	0.103516	1.48996e-05	0.0062106
cg15396570	85931161	1	DDAH1	TSS1500	Island	0.000638099	0.0425032	8.35569e-06	0.00503972	0.00055923	0.0425032	8.24819e-06	0.0041697
cg24074033	20180437	11	DBX1	Body	N_Shore	0.0024229	0.197272	8.37388e-06	0.005042	0.00219549	0.197272	1.49197e-05	0.0062106
cg08252387	87970950	5	LINC00461	Body	Island	0.000690609	0.0704043	8.43708e-06	0.00506848	0.000656726	0.0704043	1.75082e-05	0.00690509
cg23156348	124981869	11	NA		S_Shore	0.0011666	0.051179	8.44684e-06	0.00506848	0.00124625	0.051179	1.11525e-06	0.000975363
cg07357300	76319672	8	NA		Island	0.00129551	0.0569197	8.5478e-06	0.00512028	0.0011698	0.0569197	1.46609e-05	0.00617924
cg17526301	62793452	20	NA			0.000963061	0.0576375	8.59429e-06	0.00513933	0.000845631	0.0576375	8.9758e-06	0.00444126
cg00983637	26663115	1	AIM1L	Body	Island	0.000668921	0.0371892	8.60956e-06	0.00513967	0.000723718	0.0371892	5.5933e-07	0.000562265
cg06323837	71389876	10	C10orf35	TSS200	Island	0.000565479	0.0489425	8.63251e-06	0.00514374	0.000609069	0.0489425	7.33001e-07	0.000700608
cg22204479	21378227	20	NKX2-4	TSS200	Island	0.00062798	0.0366419	8.65435e-06	0.00514374	0.000557049	0.0366419	1.1279e-05	0.005233
cg06674731	154335014	2	RPRM	1stExon	Island	0.00178842	0.116205	8.6683e-06	0.00514374	0.00152033	0.116205	3.01751e-06	0.00204575
cg20809087	72612221	15	CELF6	5'UTR	Island	0.0011316	0.062281	8.67848e-06	0.00514374	0.000994668	0.062281	9.32199e-06	0.00455457
cg21179457	36002798	14	INSM2	TSS1500	Island	0.000192828	0.0172471	8.68989e-06	0.00514374	0.000197628	0.0172471	5.69807e-06	0.00322025
cg24595261	146864491	6	RAB32	TSS1500	Island	0.000687167	0.0612639	8.7306e-06	0.00515911	0.000632728	0.0612639	1.77551e-05	0.0069946
cg12638731	36045281	13	NBEA	Body	Island	0.00224081	0.226805	8.77008e-06	0.00517369	0.00190557	0.226805	3.12727e-06	0.00209981
cg04103761	26735606	1	NA		N_Shore	0.00149169	0.106419	8.79738e-06	0.00518106	0.00130634	0.106419	8.67181e-06	0.00433534
cg19924431	26735846	1	LIN28A	TSS1500	N_Shore	0.000393851	0.0463663	8.82897e-06	0.00519093	0.000367482	0.0463663	1.87589e-05	0.00723521
cg08467760	29449845	1	TMEM200B	5'UTR	Island	0.00106692	0.094526	8.87005e-06	0.0052017	0.00104919	0.094526	1.36861e-05	0.00594015
cg06364315	47178078	16	NETO2	TSS200	Island	0.000110742	0.0121118	8.87702e-06	0.0052017	0.000106381	0.0121118	1.71039e-05	0.00680704
cg13154880	48486472	4	SLC10A4	Body	Island	0.00165855	0.145768	8.92879e-06	0.00521689	0.00147766	0.145768	1.2688e-05	0.00565305
cg12068761	230562422	1	NA		Island	0.000264332	0.0192134	8.93277e-06	0.00521689	0.000259069	0.0192134	1.43591e-05	0.00609608
cg05986781	127291658	7	SND1	TSS1500	Island	0.000621413	0.036539	9.02056e-06	0.00525938	0.000643502	0.036539	4.35342e-06	0.00264859
cg13381486	131513632	2	AMER3	TSS1500	Island	0.00122642	0.143583	9.12605e-06	0.00530874	0.00111733	0.143583	1.72775e-05	0.00685274
cg07735777	140715095	7	MRPS33	TSS1500	S_Shore	0.000481554	0.0399987	9.14953e-06	0.00530874	0.000494759	0.0399987	5.63424e-06	0.00320488
cg22995692	141263164	5	NA		Island	0.00202427	0.185956	9.15076e-06	0.00530874	0.00175844	0.185956	7.33223e-06	0.00383409
cg27112666	100050791	6	NA		N_Shore	0.000676836	0.0533678	9.17216e-06	0.00531235	0.000666039	0.0533678	1.40006e-05	0.00598018
cg11510557	132312857	12	MMP17	TSS200	Island	0.000473569	0.0244329	9.23178e-06	0.00532834	0.000487884	0.0244329	5.24547e-06	0.00304625
cg02741882	29888096	16	SEZ6L2	Body	Island	0.00191031	0.101242	9.24213e-06	0.00532834	0.0017703	0.101242	1.93688e-05	0.00738692
cg25316339	79866379	5	ANKRD34B	TSS200	Island	0.00099092	0.0572301	9.24546e-06	0.00532834	0.000910026	0.0572301	1.85767e-05	0.00721631
cg04501188	47904171	1	FOXD2	1stExon	Island	0.000395125	0.0234282	9.26762e-06	0.00533232	0.000395461	0.0234282	1.06879e-05	0.00501865
cg17953764	48492845	4	ZAR1	1stExon	Island	0.00290407	0.541955	9.33239e-06	0.00535766	0.00266658	0.541955	1.87466e-05	0.00723521
cg09458272	6687367	5	NA			0.000743072	0.0435699	9.36994e-06	0.00535766	0.000712243	0.0435699	1.86067e-05	0.00721631
cg07094915	27279101	7	NA		Island	0.00221582	0.265065	9.37202e-06	0.00535766	0.00215687	0.265065	1.63396e-05	0.00659181
cg12946225	3573751	19	HMG20B	Body	Island	0.00110361	0.0920647	9.37291e-06	0.00535766	0.00102324	0.0920647	1.96782e-05	0.00746139
cg13927566	91172288	1	NA		Island	0.00161514	0.144592	9.43684e-06	0.00538541	0.00139889	0.144592	7.00294e-06	0.00374017
cg23016129	22634224	10	SPAG6	TSS200	Island	0.00183971	0.161329	9.45783e-06	0.00538859	0.00161955	0.161329	1.07832e-05	0.00504018
cg00221745	104179478	10	FBXL15	TSS200	Island	0.00041367	0.0257381	9.51718e-06	0.00541359	0.000394221	0.0257381	1.94852e-05	0.00741723
cg13667638	5831147	2	NA		N_Shore	0.0013311	0.0875731	9.56098e-06	0.00542967	0.00109357	0.0875731	4.00087e-07	0.000436015
cg27127814	53425257	13	NA		Island	0.000819326	0.0492539	9.60622e-06	0.00544652	0.000776189	0.0492539	2.01433e-05	0.00757706
cg17280346	147126703	3	ZIC1	TSS1500	N_Shore	0.00497622	0.451875	9.76607e-06	0.00552002	0.00508633	0.451875	6.97478e-06	0.00373654
cg21117668	242498349	2	BOK	5'UTR	Island	0.00112842	0.0317711	9.7674e-06	0.00552002	0.000990303	0.0317711	1.04755e-05	0.00495045
cg13409645	55866261	19	COX6B2	TSS200	Island	0.00100743	0.0700211	9.80961e-06	0.00553493	0.000892474	0.0700211	1.28391e-05	0.00567818
cg07965823	77964712	14	ISM2	Body	Island	0.000936833	0.0745852	9.84544e-06	0.0055462	0.000854724	0.0745852	1.89703e-05	0.00729827
cg00095976	118228060	6	SLC35F1	TSS1500	Island	0.000768235	0.0587187	9.89685e-06	0.0055576	0.00072846	0.0587187	2.06758e-05	0.00773577
cg14299675	91149046	9	NXNL2	TSS1500	N_Shore	0.00184951	0.202731	9.89745e-06	0.0055576	0.00168744	0.202731	1.9084e-05	0.00730931
cg26956371	124713989	10	C10orf88	TSS200	Island	0.000865889	0.0406259	9.9284e-06	0.00556341	0.000906232	0.0406259	3.33823e-06	0.00217777
cg07570142	132722421	6	MOXD1	1stExon	Island	0.000796321	0.0477003	9.9396e-06	0.00556341	0.000715762	0.0477003	1.64126e-05	0.00660707
cg03894490	159942832	3	LOC401097	TSS1500	N_Shore	0.000916764	0.0589264	9.98493e-06	0.00556425	0.000870529	0.0589264	2.0752e-05	0.00774852
cg07514505	96743754	13	HS6ST3	1stExon	Island	0.00103056	0.0963285	9.99928e-06	0.00556425	0.00088717	0.0963285	6.25409e-06	0.00341317
cg20591472	110008990	1	SYPL2	TSS200	Island	0.00309993	0.210555	1.00001e-05	0.00556425	0.00246276	0.210555	4.48635e-09	1.33242e-05
cg20300246	139096747	9	LHX3	Body	Island	0.00156327	0.14319	1.00047e-05	0.00556425	0.00150007	0.14319	1.96865e-05	0.00746139
cg01309744	155167401	7	NA		Island	0.000897396	0.0819167	1.00337e-05	0.00557151	0.000776049	0.0819167	7.29074e-06	0.00382957
cg25977493	157823817	3	SHOX2	1stExon	Island	0.00115841	0.0879252	1.02965e-05	0.00570835	0.00121561	0.0879252	3.14401e-06	0.00210298
cg08506924	3931286	16	CREBBP	TSS1500	Island	0.00100834	0.0895103	1.0375e-05	0.0057386	0.000975205	0.0895103	1.91816e-05	0.00732557
cg27541691	40811050	17	TUBG2	TSS1500	N_Shore	0.00247336	0.31719	1.03838e-05	0.0057386	0.00260753	0.31719	2.63862e-06	0.00186101
cg18948722	37006116	13	CCNA1	1stExon	Island	0.000518274	0.0379745	1.05469e-05	0.00581953	0.000486483	0.0379745	2.24618e-05	0.00823659
cg04521004	157821262	3	SHOX2	Body	Island	0.00159434	0.192512	1.05797e-05	0.00582844	0.00134418	0.192512	2.87434e-06	0.00198719
cg14704921	53728654	4	RASL11B	1stExon	Island	0.00215677	0.125463	1.06111e-05	0.00583654	0.0021462	0.125463	1.35731e-05	0.00591592
cg23328622	10199302	20	SNAP25	TSS200	N_Shore	0.000628056	0.0285408	1.06475e-05	0.00584735	0.000557102	0.0285408	1.4522e-05	0.00612807
cg26307359	27332646	17	SEZ6	Body	Island	0.00131927	0.0596603	1.06691e-05	0.00585004	0.00112319	0.0596603	4.56028e-06	0.00273637
cg14627089	57149630	19	NA		Island	0.00183423	0.18857	1.07217e-05	0.0058586	0.00156086	0.18857	4.50534e-06	0.00270805
cg14894848	48884945	22	FAM19A5	TSS1500	Island	0.00247723	0.27047	1.07285e-05	0.0058586	0.00223441	0.27047	1.86748e-05	0.0072347
cg17094296	169931799	4	CBR4	TSS1500	S_Shore	0.000163965	0.0148383	1.07349e-05	0.0058586	0.000162591	0.0148383	1.44354e-05	0.00610626
cg04011228	154335250	2	RPRM	1stExon	Island	0.00125414	0.120096	1.07882e-05	0.0058785	0.00115825	0.120096	2.24232e-05	0.00823107
cg11176990	39187533	2	LOC375196	TSS200	Island	0.000433238	0.0263767	1.09734e-05	0.00597014	0.000415763	0.0263767	2.14871e-05	0.00797111
cg26692294	6449001	5	UBE2QL1	5'UTR	Island	0.000595717	0.0285875	1.11607e-05	0.00606259	0.00056772	0.0285875	2.27566e-05	0.0082667
cg05041351	1922149	16	MEIOB	5'UTR	Island	0.00100586	0.0548996	1.11783e-05	0.00606273	0.000886935	0.0548996	1.37891e-05	0.00595396
cg05350411	569174	4	NA		Island	0.0011182	0.0796084	1.12416e-05	0.00607077	0.000930171	0.0796084	1.50511e-06	0.00121366
cg23883058	5813866	2	NA		S_Shore	0.00172514	0.123909	1.12452e-05	0.00607077	0.00142809	0.123909	1.08402e-06	0.000960044
cg12044123	28554864	6	ZBED9	1stExon	Island	0.00133906	0.073239	1.12452e-05	0.00607077	0.00125874	0.073239	2.39168e-05	0.0085989
cg15057434	39521931	19	FBXO27	Body	N_Shore	0.000725584	0.0489858	1.14828e-05	0.00618948	0.000746287	0.0489858	6.9445e-06	0.00373175
cg07123069	54367250	12	HOXC11	1stExon	Island	0.00134149	0.156106	1.15853e-05	0.00623318	0.00113959	0.156106	4.76491e-06	0.00283484
cg00065905	116381304	1	NHLH2	5'UTR	Island	0.00145738	0.150409	1.16182e-05	0.00623318	0.00135065	0.150409	2.44663e-05	0.00874865
cg05823605	45928133	7	IGFBP1	1stExon	Island	0.00165486	0.121092	1.16221e-05	0.00623318	0.00144312	0.121092	1.13112e-05	0.00524042
cg10422777	79631227	9	NA		Island	0.00185762	0.130079	1.16351e-05	0.00623318	0.00152487	0.130079	6.12745e-07	0.000602118
cg17486101	113445029	4	NA		Island	0.00139242	0.0797892	1.16926e-05	0.00625439	0.00147604	0.0797892	2.40494e-06	0.00174341
cg19302722	119067753	2	NA			0.000183444	0.0207837	1.1912e-05	0.00636098	0.000178544	0.0207837	2.04765e-05	0.0076694
cg14311597	2652531	17	MIR1253	TSS1500	Island	0.00160138	0.126694	1.19282e-05	0.00636098	0.0013586	0.126694	4.73763e-06	0.00282635
cg23553442	74062096	9	NA		Island	0.00183174	0.19438	1.20734e-05	0.00642861	0.00167421	0.19438	2.38934e-05	0.0085989
cg17098147	22634142	10	SPAG6	TSS1500	Island	0.00180986	0.168274	1.2121e-05	0.00643712	0.00156497	0.168274	9.53403e-06	0.0046452
cg17538572	94834763	10	CYP26A1	Body	Island	0.000880242	0.0397104	1.21262e-05	0.00643712	0.000758669	0.0397104	8.64748e-06	0.00433397
cg02759846	51227943	19	CLEC11A	Body	Island	0.00137522	0.0996705	1.22231e-05	0.00647533	0.00138145	0.0996705	1.31009e-05	0.0057576
cg08512702	13548915	4	LOC285548	Body	Island	0.000569042	0.0466628	1.22352e-05	0.00647533	0.000586781	0.0466628	6.89121e-06	0.00370881
cg05835018	232260784	2	B3GNT7	Body	Island	0.000466152	0.047317	1.23186e-05	0.00650961	0.000434713	0.047317	2.62102e-05	0.00918737
cg22513857	28344273	15	OCA2	5'UTR	Island	0.000759444	0.0690024	1.24702e-05	0.00657979	0.000747598	0.0690024	1.87504e-05	0.00723521
cg12658947	132952915	11	OPCML	Body	Island	0.000710412	0.0544583	1.25099e-05	0.00659078	0.000707467	0.0544583	1.57353e-05	0.00643164
cg18582992	45479642	15	SHF	Body	Island	0.00148621	0.0700132	1.25427e-05	0.00659815	0.00138357	0.0700132	2.66668e-05	0.00931011
cg15900248	60280812	1	HOOK1	1stExon	Island	0.00170847	0.138557	1.26066e-05	0.00662182	0.00160337	0.138557	2.68274e-05	0.00932084
cg04182321	107799979	11	RAB39A	Body	Island	0.000456978	0.0412294	1.27866e-05	0.00670585	0.000402342	0.0412294	1.58273e-05	0.00645313
cg22934295	42306385	3	CCK	1stExon	Island	0.000771044	0.0454941	1.2805e-05	0.00670585	0.00067661	0.0454941	1.4831e-05	0.00619866
cg25702790	79765394	7	GNAI1	Body	S_Shore	0.000718207	0.0574827	1.29363e-05	0.00675446	0.000704944	0.0574827	2.01956e-05	0.00758857
cg23779890	75262522	8	GDAP1	TSS200	Island	0.0016384	0.187257	1.29364e-05	0.00675446	0.00163234	0.187257	1.61419e-05	0.0065357
cg03431972	153857918	5	HAND1	TSS200	Island	0.00143208	0.131607	1.30519e-05	0.00679348	0.00118787	0.131607	1.71764e-06	0.00133825
cg27597956	31839463	11	PAX6	5'UTR	Island	0.000854758	0.0865472	1.3054e-05	0.00679348	0.000767394	0.0865472	2.20546e-05	0.00812134
cg25427880	102322128	10	NA		Island	0.0014856	0.307136	1.30694e-05	0.00679348	0.00158258	0.307136	2.20861e-06	0.00163002
cg12782992	9026055	11	NRIP3	TSS1500	Island	0.000751191	0.0602265	1.31356e-05	0.00680888	0.000698486	0.0602265	2.78851e-05	0.00959186
cg09492887	103085978	7	SLC26A5	5'UTR	Island	0.00103608	0.0734578	1.31379e-05	0.00680888	0.000886721	0.0734578	7.73855e-06	0.00396942
cg07247419	21376484	20	NKX2-4	3'UTR	Island	0.0016208	0.235081	1.33095e-05	0.00688756	0.00160387	0.235081	1.85257e-05	0.00721374
cg24497836	48470678	15	MYEF2	TSS200	S_Shore	0.00103539	0.120597	1.33389e-05	0.00689244	0.00100952	0.120597	2.25302e-05	0.00823878
cg26789332	63788255	1	FOXD3	TSS1500	Island	0.000414004	0.0233575	1.33583e-05	0.00689244	0.000363207	0.0233575	1.55566e-05	0.00637249
cg06341054	52917543	4	SPATA18	TSS200	Island	0.000857925	0.0370779	1.33912e-05	0.00689454	0.0008602	0.0370779	1.48744e-05	0.00620938
cg01688688	140614000	5	PCDHB18P	Body	N_Shore	0.00195734	0.286616	1.34018e-05	0.00689454	0.00170825	0.286616	1.39434e-05	0.00597039
cg05700079	147126961	3	ZIC1	TSS1500	N_Shore	0.00181302	0.304686	1.36022e-05	0.00698736	0.00160271	0.304686	1.84427e-05	0.00719255
cg05554039	75379223	11	MAP6	1stExon	Island	0.00049244	0.0643176	1.36483e-05	0.00700078	0.000509382	0.0643176	7.05104e-06	0.0037447
cg15222899	55095249	18	NA		Island	0.002556	0.129478	1.3684e-05	0.00700879	0.00223023	0.129478	1.42609e-05	0.00606915
cg09972864	22248760	13	FGF9	Body	Island	0.000454968	0.04573	1.37146e-05	0.00701422	0.000429689	0.04573	2.87766e-05	0.00980213
cg04124126	136871900	6	MAP7	TSS200	Island	0.000832996	0.0621217	1.39736e-05	0.00713622	0.00081758	0.0621217	2.17687e-05	0.00804996
cg26912984	111408745	6	SLC16A10	TSS200	Island	0.000383797	0.0417752	1.40451e-05	0.00715736	0.000384393	0.0417752	1.59022e-05	0.00646859
cg23718606	27219812	6	PRSS16	Body	Island	0.00136013	0.18531	1.40559e-05	0.00715736	0.0014425	0.18531	2.94178e-06	0.00201664
cg22689366	59324986	11	NA		N_Shelf	0.000561244	0.0440056	1.41604e-05	0.00720013	0.000574366	0.0440056	9.92463e-06	0.00478222
cg13570972	31839632	11	PAX6	TSS200	Island	0.00215357	0.201647	1.41897e-05	0.00720454	0.00178226	0.201647	1.77458e-06	0.00137648
cg04008429	160167646	3	TRIM59	TSS200	Island	0.000563223	0.0285037	1.42316e-05	0.00721534	0.000612178	0.0285037	8.50577e-07	0.000785102
cg13029847	27333273	17	SEZ6	TSS200	S_Shore	0.000581969	0.0343595	1.42936e-05	0.00722685	0.000507872	0.0343595	1.51475e-05	0.00625619
cg04765277	8094679	10	FLJ45983	Body	Island	0.00180553	0.241948	1.42956e-05	0.00722685	0.00166398	0.241948	2.97275e-05	0.00999425
cg09754845	1408818	7	NA		Island	0.00109111	0.0559517	1.43544e-05	0.00723697	0.00101006	0.0559517	3.02536e-05	0.0101084
cg02071005	175200844	2	SP9	Body	Island	0.00147832	0.0619979	1.4357e-05	0.00723697	0.00127777	0.0619979	1.19802e-05	0.00544815
cg24510700	46138725	6	ENPP5	TSS200		0.000342386	0.0237835	1.44688e-05	0.0072744	0.000354441	0.0237835	7.32647e-06	0.00383409
cg06022942	8095484	10	FLJ45983	TSS200	Island	0.00129142	0.0764874	1.44729e-05	0.0072744	0.00137417	0.0764874	2.63628e-06	0.00186101
cg03127334	40033634	21	ERG	5'UTR	Island	0.00290236	0.258519	1.46228e-05	0.00733923	0.00284469	0.258519	2.31513e-05	0.00837533
cg17439093	107302364	7	SLC26A4	Body	Island	0.000521949	0.0270045	1.46687e-05	0.00734952	0.000547243	0.0270045	4.86626e-06	0.0028659
cg17273416	54368203	12	HOXC11	Body	Island	0.00162245	0.158527	1.47072e-05	0.00734952	0.00143757	0.158527	2.10796e-05	0.00783654
cg24185443	11533199	19	CCDC151	Body	Island	0.000768155	0.0734957	1.47077e-05	0.00734952	0.000800189	0.0734957	6.11714e-06	0.00335939
cg20985755	24536474	3	THRB	TSS200	Island	0.00175531	0.0650363	1.47565e-05	0.00734952	0.00152234	0.0650363	1.36194e-05	0.00591852
cg23402821	35292159	17	NA		Island	0.00106837	0.0550738	1.47646e-05	0.00734952	0.000986916	0.0550738	3.09605e-05	0.010237
cg05531255	167967782	3	EGFEM1P	Body	Island	0.00026601	0.0169363	1.47694e-05	0.00734952	0.000243074	0.0169363	2.94371e-05	0.00995927
cg13661968	20621474	11	SLC6A5	Body	N_Shore	0.00125061	0.0723359	1.48277e-05	0.00736806	0.00108017	0.0723359	1.2289e-05	0.00553994
cg11208039	19138753	11	ZDHHC13	1stExon	Island	0.000623105	0.034042	1.50192e-05	0.00744967	0.00068044	0.034042	6.86412e-07	0.000661501
cg02824202	6729810	18	NA		Island	0.00246837	0.0769212	1.50345e-05	0.00744967	0.00213304	0.0769212	1.27061e-05	0.00565305
cg02674352	61275826	11	LRRC10B	TSS1500	Island	0.00141639	0.106407	1.5117e-05	0.00747039	0.00129951	0.106407	3.09114e-05	0.0102305
cg08631504	89943431	15	NA		Island	0.000390048	0.0336847	1.5119e-05	0.00747039	0.000372323	0.0336847	3.02503e-05	0.0101084
cg03301200	99954557	8	NA		Island	0.000841846	0.0439168	1.51994e-05	0.00749952	0.000733598	0.0439168	1.59015e-05	0.00646859
cg09938227	156390124	1	C1orf61	5'UTR	N_Shore	0.00147174	0.118377	1.52406e-05	0.00749958	0.00156408	0.118377	2.96924e-06	0.00202387
cg06158650	119522637	1	TBX15	5'UTR	Island	0.00152081	0.121878	1.52797e-05	0.00749958	0.00127266	0.121878	3.89016e-06	0.00245646
cg06557358	32907002	17	TMEM132E	TSS1500	Island	0.000427087	0.0428879	1.52981e-05	0.00749958	0.000411901	0.0428879	2.85086e-05	0.00974623
cg25741215	63287082	2	NA		Island	0.000649619	0.0432246	1.52989e-05	0.00749958	0.000622922	0.0432246	2.97791e-05	0.00999762
cg22635008	50970249	10	OGDHL	5'UTR	Island	0.00102719	0.0543972	1.53068e-05	0.00749958	0.00103613	0.0543972	1.50676e-05	0.00625273
cg20176194	220173205	2	PTPRN	Body	Island	0.0003173	0.0280853	1.53846e-05	0.0075272	0.000290514	0.0280853	3.10983e-05	0.0102729
cg01580888	33556060	19	RHPN2	TSS1500	Island	0.000605657	0.0305554	1.56344e-05	0.00761791	0.0005676	0.0305554	3.32258e-05	0.0108069
cg21195185	76555782	4	CDKL2	TSS200	Island	0.000931593	0.0571237	1.56606e-05	0.00761791	0.00103092	0.0571237	2.85504e-07	0.000346519
cg00019759	212687842	1	NA		N_Shore	0.00138178	0.256603	1.56699e-05	0.00761791	0.00124667	0.256603	2.85289e-05	0.00974623
cg07160746	43726765	20	KCNS1	Body	Island	0.0029024	0.208524	1.56783e-05	0.00761791	0.00268196	0.208524	3.29522e-05	0.0107333
cg08592707	56833076	17	PPM1E	TSS200	Island	0.000386175	0.0247725	1.57163e-05	0.00761791	0.000391379	0.0247725	1.39606e-05	0.00597039
cg16823083	3567412	1	WRAP73	TSS1500	Island	0.0017581	0.119836	1.57265e-05	0.00761791	0.00150424	0.119836	1.00905e-05	0.00481589
cg07806886	120626899	3	STXBP5L	TSS200	Island	0.00128894	0.108518	1.57418e-05	0.00761791	0.00124139	0.108518	2.96576e-05	0.00999425
cg05962092	49575664	19	KCNA7	1stExon	Island	0.00461833	0.402322	1.57667e-05	0.00761791	0.00378437	0.402322	1.12526e-06	0.00097922
cg13921352	68981890	3	FAM19A4	TSS200	Island	0.000835181	0.049389	1.57727e-05	0.00761791	0.000689673	0.049389	1.93725e-06	0.00147326
cg14492293	139093852	9	LHX3	Body	Island	0.000547324	0.0300021	1.57878e-05	0.00761791	0.000487929	0.0300021	2.50697e-05	0.00890358
cg25740565	200335101	2	FLJ32063	Body	N_Shore	0.00102848	0.0777507	1.58528e-05	0.00763875	0.000952612	0.0777507	3.35044e-05	0.0108503
cg07802917	123603311	3	MYLK	TSS200	Island	0.000411322	0.0259972	1.58977e-05	0.00763982	0.000412853	0.0259972	1.72597e-05	0.00685274
cg09109122	36173609	1	NA		Island	0.000337326	0.022716	1.58987e-05	0.00763982	0.000316536	0.022716	3.36895e-05	0.0108522
cg15475851	105037349	10	INA	1stExon	Island	0.0011976	0.0462797	1.59574e-05	0.00764878	0.00112376	0.0462797	3.38682e-05	0.0108653
cg27551605	43862910	17	CRHR1	Body	Island	0.0011917	0.0838149	1.59611e-05	0.00764878	0.0010274	0.0838149	1.29642e-05	0.00571184
cg08336641	6414602	18	L3MBTL4	5'UTR	Island	0.00160909	0.100079	1.59865e-05	0.00765049	0.00134052	0.100079	3.35921e-06	0.00218427
cg20184732	100565953	9	NA		Island	0.000533646	0.056889	1.60558e-05	0.00767314	0.00056267	0.056889	4.36887e-06	0.00264878
cg17942639	154335184	2	RPRM	1stExon	Island	0.000348559	0.016132	1.61386e-05	0.00770216	0.000327744	0.016132	3.40822e-05	0.010901
cg17816394	235814009	1	GNG4	TSS1500	Island	0.000915482	0.050083	1.61884e-05	0.00771544	0.000772156	0.050083	6.20585e-06	0.00339214
cg13163729	45169447	2	SIX3	1stExon	N_Shore	0.000738314	0.0609134	1.63495e-05	0.00777524	0.000658735	0.0609134	2.64018e-05	0.00924528
cg02078690	122852454	11	BSX	TSS200	Island	0.00188352	0.146934	1.63583e-05	0.00777524	0.00153937	0.146934	1.00544e-06	0.000899563
cg26210445	162273326	2	TBR1	1stExon	Island	0.000839664	0.0708446	1.64001e-05	0.00778296	0.000795369	0.0708446	3.39579e-05	0.0108785
cg12988424	62355884	3	FEZF2	Body	N_Shore	0.00132538	0.0899012	1.64191e-05	0.00778296	0.00122863	0.0899012	3.47723e-05	0.0110184
cg06005695	27841388	6	HIST1H4L	TSS200	S_Shore	0.000925862	0.0778357	1.65316e-05	0.00781371	0.00100778	0.0778357	9.65392e-07	0.00087492
cg03715143	19837743	6	ID4	1stExon	Island	0.000969565	0.0658993	1.65628e-05	0.00781371	0.000802326	0.0658993	2.4552e-06	0.00176364
cg07160932	29888733	16	SEZ6L2	Body	S_Shore	0.00158064	0.0672428	1.65896e-05	0.00781371	0.00137006	0.0672428	1.57576e-05	0.00643222
cg01313497	63278100	2	OTX1	5'UTR	Island	0.000332395	0.030111	1.66178e-05	0.00781371	0.00034757	0.030111	6.15589e-06	0.00337178
cg18431640	100637191	13	ZIC2	Body	Island	0.00131797	0.187589	1.66326e-05	0.00781371	0.00121933	0.187589	3.5094e-05	0.0111102
cg20723355	6679597	17	FBXO39	5'UTR	Island	0.00191229	0.0923539	1.66543e-05	0.00781371	0.00156106	0.0923539	9.57722e-07	0.000870224
cg01352586	202995473	1	NA		Island	0.000825941	0.0701693	1.66548e-05	0.00781371	0.000734849	0.0701693	2.59819e-05	0.00915644
cg17180678	89915003	15	NA		Island	0.00179092	0.0932361	1.66626e-05	0.00781371	0.00150389	0.0932361	5.38177e-06	0.0031026
cg00613752	110300308	6	GPR6	1stExon	Island	0.00178001	0.214161	1.6801e-05	0.00786805	0.0014249	0.214161	1.34914e-07	0.000198174
cg26427436	30051327	18	GAREM	TSS1500	Island	0.000886342	0.0582483	1.69974e-05	0.00794936	0.000780359	0.0582483	2.25855e-05	0.00823878
cg01321673	50438363	22	IL17REL	Body	Island	0.0021089	0.35099	1.70387e-05	0.00795807	0.00189774	0.35099	3.05195e-05	0.0101573
cg02639634	54792161	8	RGS20	Body	Island	0.00162836	0.105331	1.70646e-05	0.00795954	0.00134251	0.105331	2.07691e-06	0.00154917
cg21496658	154797677	3	MME	TSS1500	Island	0.00132947	0.0695243	1.72474e-05	0.00802422	0.00114185	0.0695243	1.30148e-05	0.00572696
cg25287474	14693538	9	ZDHHC21	TSS200	Island	0.0023148	0.122979	1.72698e-05	0.00802422	0.00257756	0.122979	2.03353e-07	0.000267437
cg18064714	20824556	7	SP8	Body	Island	0.00143323	0.250512	1.73023e-05	0.00802422	0.00126863	0.250512	2.522e-05	0.00893883
cg03554170	36606756	5	SLC1A3	1stExon		0.000400095	0.0319314	1.7307e-05	0.00802422	0.000368567	0.0319314	3.60838e-05	0.0113313
cg08584627	98703355	2	VWA3B	TSS1500	Island	0.000745159	0.0652931	1.7318e-05	0.00802422	0.000733015	0.0652931	2.6002e-05	0.00915644
cg24035598	61124418	14	NA		Island	0.000725868	0.0598978	1.74336e-05	0.00806709	0.000683527	0.0598978	3.66973e-05	0.0114724
cg00172597	223538379	1	SUSD4	TSS1500	Island	0.000603805	0.0370892	1.76365e-05	0.00815019	0.000527959	0.0370892	2.07707e-05	0.00774852
cg08536529	140602889	5	PCDHB14	TSS200	N_Shore	0.00146744	0.0837774	1.7711e-05	0.00817384	0.00135987	0.0837774	3.752e-05	0.0116258
cg06552356	85674531	12	ALX1	Body	Island	0.000829575	0.0660336	1.78676e-05	0.00822931	0.000766663	0.0660336	3.76469e-05	0.0116418
cg26972969	87973899	5	LINC00461	Body	N_Shore	0.000662524	0.0685938	1.79094e-05	0.00822931	0.000612958	0.0685938	3.78202e-05	0.0116465
cg05714219	31361104	2	GALNT14	1stExon	Island	0.000221661	0.0179456	1.79192e-05	0.00822931	0.000212795	0.0179456	3.42834e-05	0.0109427
cg24388061	141249678	8	TRAPPC9	Body		0.000944402	0.937723	1.79253e-05	0.00822931	0.00102606	0.937723	1.20695e-06	0.0010273
cg07584077	240965270	2	NDUFA10	TSS1500	Island	0.000517308	0.0394314	1.79611e-05	0.00823006	0.00049952	0.0394314	3.2937e-05	0.0107333
cg07706463	101005451	1	GPR88	Body	Island	0.000330356	0.025005	1.7974e-05	0.00823006	0.000335959	0.025005	1.47955e-05	0.00619557
cg03751030	56015576	8	XKR4	1stExon	Island	0.000471462	0.0363944	1.80108e-05	0.00823612	0.000410778	0.0363944	1.98119e-05	0.00750079
cg05632623	78450055	17	NPTX1	1stExon	Island	0.00060598	0.07218	1.82055e-05	0.00831428	0.000539391	0.07218	2.89972e-05	0.00984852
cg16520312	43971471	17	MAPT	TSS1500	Island	0.00163508	0.129267	1.82668e-05	0.00833141	0.00158435	0.129267	3.2471e-05	0.010626
cg12662091	124931535	3	SLC12A8	5'UTR	Island	0.000782081	0.0637054	1.83734e-05	0.00836128	0.000701794	0.0637054	3.22494e-05	0.0105733
cg04819760	22765645	10	NA		Island	0.00124771	0.116402	1.83801e-05	0.00836128	0.0012339	0.116402	2.55827e-05	0.00903991
cg15480367	93389485	14	CHGA	5'UTR	Island	0.0019375	0.293324	1.84199e-05	0.00836486	0.00169118	0.293324	2.12186e-05	0.00787984
cg22702772	48699012	3	CELSR3	1stExon	Island	0.0008233	0.0190387	1.84358e-05	0.00836486	0.000843284	0.0190387	1.27771e-05	0.00567227
cg18826572	144510343	8	NA		N_Shore	0.00158337	0.171032	1.84685e-05	0.00836885	0.00151838	0.171032	3.56991e-05	0.011261
cg12100751	109203672	1	HENMT1	1stExon	Island	0.00161149	0.136563	1.85077e-05	0.00837576	0.00170876	0.136563	4.12995e-06	0.00256619
cg07388347	133481466	12	NA		N_Shelf	0.00145614	0.116531	1.8621e-05	0.00840343	0.00137589	0.116531	3.87754e-05	0.0118601
cg20926035	45236630	2	SIX2	TSS200	Island	0.00153839	0.0773602	1.86226e-05	0.00840343	0.00128903	0.0773602	5.9548e-06	0.00330134
cg13790603	24536478	3	THRB	TSS200	Island	0.00268798	0.133561	1.86441e-05	0.00840343	0.00232042	0.133561	1.67152e-05	0.00669807
cg16330247	5834638	2	SOX11	3'UTR	N_Shore	0.00153021	0.150443	1.86913e-05	0.00840343	0.00139282	0.150443	3.69987e-05	0.0114993
cg12448933	72667378	17	RAB37	5'UTR	Island	0.00208546	0.238512	1.86968e-05	0.00840343	0.00173642	0.238512	4.42593e-06	0.00266775
cg10501210	207997020	1	NA			-0.00663332	0.495488	1.87129e-05	0.00840343	-0.00742356	0.495488	1.51033e-07	0.000216538
cg08813062	175199576	2	SP9	TSS1500	Island	0.00129	0.136286	1.8756e-05	0.00841198	0.001235	0.136286	3.66342e-05	0.011463
cg01424147	103348258	10	POLL	TSS1500	S_Shore	0.000248922	0.0292158	1.87994e-05	0.00842063	0.000234654	0.0292158	3.9295e-05	0.0119638
cg07169873	2652559	17	MIR1253	TSS1500	Island	0.0014116	0.114303	1.8871e-05	0.0084419	0.00119466	0.114303	9.18875e-06	0.00450205
cg24890054	18059752	2	KCNS3	TSS200	Island	0.00103143	0.0476413	1.90242e-05	0.00849955	0.000952752	0.0476413	4.00873e-05	0.0121416
cg13933080	22634145	10	SPAG6	TSS1500	Island	0.00221097	0.337868	1.92184e-05	0.0085754	0.00188072	0.337868	1.13249e-05	0.00524042
cg00373707	126873379	11	NA		Island	0.0014379	0.0716233	1.93066e-05	0.00860375	0.00117077	0.0716233	1.13454e-06	0.000982401
cg02374745	6679564	17	FBXO39	1stExon	Island	0.00225264	0.141619	1.9444e-05	0.00865398	0.00187285	0.141619	4.42653e-06	0.00266775
cg26189067	32852828	2	TTC27	TSS1500	N_Shore	0.00103947	0.0874858	1.96857e-05	0.0087504	0.00105414	0.0874858	1.73169e-05	0.00685282
cg14556683	15342982	19	EPHX3	1stExon	Island	0.00207091	0.300744	1.97649e-05	0.00876209	0.00182157	0.300744	2.67793e-05	0.00932084
cg14482902	36714803	17	SRCIN1	Body	Island	0.00100291	0.0758004	1.9772e-05	0.00876209	0.00107509	0.0758004	2.77563e-06	0.00193472
cg09086835	89922345	15	LOC254559	Body	Island	0.00109262	0.110509	1.97871e-05	0.00876209	0.00102299	0.110509	4.19982e-05	0.0125522
cg15728256	40254184	1	BMP8B	5'UTR	Island	0.0015896	0.0843584	1.9828e-05	0.0087691	0.00144125	0.0843584	3.83966e-05	0.0117826
cg03406394	60296138	15	FOXB1	TSS1500	Island	0.000776372	0.0785383	2.0287e-05	0.00895149	0.000734214	0.0785383	4.2017e-05	0.0125522
cg15722151	12946231	19	RTBDN	TSS200	S_Shore	0.000633624	0.0548661	2.02916e-05	0.00895149	0.000565666	0.0548661	3.40903e-05	0.010901
cg21270860	38513318	1	POU3F1	TSS1500	Island	0.00203449	0.114469	2.04168e-05	0.00899539	0.00172596	0.114469	1.13692e-05	0.00524701
cg16219246	57396890	4	NA		Island	0.000787707	0.0690849	2.0588e-05	0.00905938	0.000753941	0.0690849	4.01274e-05	0.0121433
cg15600422	88450381	16	NA		Island	0.000348906	0.0303323	2.06571e-05	0.00907839	0.000323963	0.0303323	4.3845e-05	0.0128568
cg26793256	28494004	13	PDX1	TSS200	Island	0.000655322	0.0717115	2.07146e-05	0.00909146	0.000612533	0.0717115	4.4006e-05	0.0128932
cg19507068	79764176	7	GNAI1	1stExon	Island	0.00195144	0.066773	2.07388e-05	0.00909146	0.00167512	0.066773	1.67372e-05	0.00669923
cg03002352	17699688	2	RAD51AP2	1stExon		0.0010093	0.0762942	2.10174e-05	0.00920199	0.000849544	0.0762942	8.9156e-06	0.00442398
cg19496158	3489600	5	NA			0.00171555	0.90476	2.106e-05	0.00920199	0.0015248	0.90476	3.373e-05	0.0108552
cg27061971	72746990	5	NA		Island	0.0013201	0.129965	2.10699e-05	0.00920199	0.00125222	0.129965	4.30759e-05	0.0126951
cg08121041	239147445	2	HES6	3'UTR	N_Shore	0.00181622	0.873909	2.12545e-05	0.00927103	0.00181419	0.873909	2.51354e-05	0.00891787
cg01717446	71503566	2	NA		Island	0.00141476	0.0913014	2.13044e-05	0.00928125	0.00145076	0.0913014	1.44348e-05	0.00610626
cg06647751	88149324	10	NA		Island	0.00132296	0.107771	2.13377e-05	0.00928417	0.00114025	0.107771	1.93845e-05	0.00738692
cg20061722	233463492	1	KIAA1804	TSS200	N_Shore	0.000365537	0.0227483	2.13858e-05	0.00929356	0.000391636	0.0227483	3.13971e-06	0.00210298
cg25124276	25464008	10	LOC100128811	Body	Island	0.00273838	0.147487	2.15823e-05	0.00936729	0.00220699	0.147487	6.34032e-07	0.000617829
cg01929377	37634127	13	SUPT20H	TSS1500	S_Shore	0.00193148	0.157271	2.16282e-05	0.00937561	0.00196458	0.157271	1.7836e-05	0.00701856
cg16036528	25909472	8	NA		Island	0.00137888	0.159466	2.1751e-05	0.00941718	0.00115369	0.159466	7.37885e-06	0.0038527
cg05757654	11919554	1	NPPB	TSS1500	Island	0.000602682	0.0539911	2.17873e-05	0.00942122	0.000540548	0.0539911	3.88274e-05	0.0118627
cg09017434	16179660	5	MARCH11	1stExon	Island	0.0041158	0.274607	2.18519e-05	0.00943747	0.00340125	0.274607	4.04477e-06	0.00253124
cg00056074	131485150	2	NA		Island	0.00082093	0.0698538	2.19236e-05	0.00945169	0.000864303	0.0698538	6.6392e-06	0.00358974
cg04528819	130418315	7	KLF14	1stExon	Island	0.00118396	0.118855	2.19388e-05	0.00945169	0.00107713	0.118855	4.37205e-05	0.0128526
cg16026922	41259044	4	UCHL1	Body	Island	0.00172115	0.279661	2.20191e-05	0.00947462	0.00175105	0.279661	1.80718e-05	0.00709538
cg02431597	181452137	1	CACNA1E	TSS1500	N_Shore	0.00114003	0.130619	2.20874e-05	0.00949232	0.000998381	0.130619	2.84907e-05	0.00974623
cg01667837	124405605	7	GPR37	1stExon	Island	0.00049553	0.0378737	2.22212e-05	0.00953811	0.000497873	0.0378737	2.36242e-05	0.00851997
cg05906092	140098427	7	SLC37A3	TSS200	Island	0.000940934	0.0782404	2.22765e-05	0.00955011	0.000931442	0.0782404	3.03868e-05	0.0101421
cg14036479	155250220	7	EN2	TSS1500	Island	0.00083728	0.0737405	2.23362e-05	0.00956401	0.00074193	0.0737405	3.47097e-05	0.0110184
cg15469272	91189314	1	NA		Island	0.00129231	0.149762	2.24332e-05	0.0095915	0.00126118	0.149762	3.67587e-05	0.0114724
cg02164452	61468757	10	SLC16A9	5'UTR	Island	0.000626088	0.0439458	2.24553e-05	0.0095915	0.000597961	0.0439458	4.42069e-05	0.0129077
cg23248150	166796183	4	TLL1	Body	S_Shore	0.00192588	0.170137	2.25194e-05	0.00960099	0.00164867	0.170137	1.74889e-05	0.00690509
cg24938956	4670603	19	MYDGF	TSS200	S_Shore	0.000286771	0.0280906	2.25324e-05	0.00960099	0.000277176	0.0280906	4.05452e-05	0.0122274
cg05266781	54965492	16	IRX5	Body	Island	0.00159831	0.134988	2.25843e-05	0.0096114	0.00125825	0.134988	3.84738e-08	7.10196e-05
cg18954388	20621495	11	SLC6A5	Body	N_Shore	0.00127522	0.146147	2.27146e-05	0.00963887	0.00105339	0.146147	4.27804e-06	0.00261638
cg12573849	105470711	2	POU3F3	TSS1500	Island	0.00125125	0.10837	2.27198e-05	0.00963887	0.00111368	0.10837	3.7468e-05	0.0116199
cg11602901	62354878	3	NA		Island	0.00120711	0.135689	2.27315e-05	0.00963887	0.00107069	0.135689	3.59003e-05	0.0113041
cg15313320	17374127	11	NCR3LG1	Body	N_Shore	0.00115951	0.0794215	2.29007e-05	0.00969653	0.00126423	0.0794215	1.38998e-06	0.00114412
cg03020208	50354962	12	AQP5	TSS1500	Island	0.00166177	0.438231	2.29398e-05	0.00969653	0.0014966	0.438231	4.27018e-05	0.0126488
cg00211630	74022875	11	P4HA3	TSS200	S_Shore	0.00179358	0.306042	2.29506e-05	0.00969653	0.00160274	0.306042	3.96548e-05	0.0120524
cg13223402	47797133	2	KCNK12	1stExon	Island	0.00021393	0.0179837	2.31024e-05	0.00974888	0.000203184	0.0179837	4.66484e-05	0.0133215
cg07104660	67873511	8	NA		Island	0.000557085	0.0422857	2.31472e-05	0.00975601	0.000477667	0.0422857	1.90058e-05	0.00729827
cg01683794	97059349	14	NA		Island	0.00112507	0.0789933	2.31788e-05	0.00975705	0.0010093	0.0789933	4.17084e-05	0.0125027
cg15386368	56833099	17	PPM1E	TSS200	Island	0.000285024	0.0217275	2.32054e-05	0.00975705	0.000291412	0.0217275	1.6946e-05	0.0067673
cg00766914	107781299	6	PDSS2	TSS1500	Island	0.000820652	0.0823525	2.32412e-05	0.00976034	0.000713121	0.0823525	2.62001e-05	0.00918737
cg08377768	160474222	3	PPM1L	1stExon	Island	0.000761972	0.0751691	2.33477e-05	0.0097933	0.000758395	0.0751691	2.92522e-05	0.00990627
cg11283700	37027815	9	PAX5	Body	Island	0.000600722	0.0362823	2.35168e-05	0.00985245	0.000646479	0.0362823	2.88047e-06	0.0019875
cg19809499	47882265	1	FOXE3	1stExon	Island	0.000419861	0.0267281	2.35656e-05	0.00986109	0.000378606	0.0267281	4.43837e-05	0.0129388
cg13791254	100616607	9	FOXE1	1stExon	Island	0.00254601	0.118615	2.36206e-05	0.00987228	0.00231823	0.118615	4.7496e-05	0.0134864
cg04673825	10459183	4	ZNF518B	TSS200	Island	0.00107187	0.0346649	2.37597e-05	0.00991114	0.00112641	0.0346649	7.78415e-06	0.00398114
cg14871932	44185323	7	GCK	Body	Island	0.00127191	0.0741549	2.37702e-05	0.00991114	0.0010771	0.0741549	1.36176e-05	0.00591852
cg26805749	16627534	11	NA		Island	0.0018279	0.160393	2.38256e-05	0.00992241	0.00172007	0.160393	4.99292e-05	0.0139398
cg24120841	24536562	3	THRB	TSS1500	Island	0.00099911	0.0567247	2.38981e-05	0.00994074	0.000890389	0.0567247	4.02986e-05	0.0121727
cg05868512	54794875	8	RGS20	Body	Island	0.000981284	0.0989603	2.40943e-05	0.0100105	0.000803503	0.0989603	2.88956e-06	0.00198985
cg17605476	158143917	4	GRIA2	Body	Island	0.00196205	0.138027	2.41467e-05	0.0100204	0.0015295	0.138027	8.30741e-09	2.13687e-05
cg00397986	11561593	8	GATA4	TSS200	Island	0.00119297	0.113283	2.42236e-05	0.0100403	0.00104209	0.113283	3.05829e-05	0.0101573
cg17471928	37381830	17	STAC2	1stExon	Island	0.000595004	0.062228	2.42783e-05	0.0100511	0.000526611	0.062228	3.76718e-05	0.0116418
cg12908899	242480945	2	NA		Island	0.00110281	0.0642223	2.43574e-05	0.0100661	0.000929455	0.0642223	1.19919e-05	0.00544815
cg24725576	29234671	14	NA		N_Shore	0.00214727	0.192711	2.43721e-05	0.0100661	0.00213434	0.192711	3.11686e-05	0.0102864
cg12832649	136834863	5	SPOCK1	5'UTR	Island	0.000524488	0.0457178	2.44979e-05	0.0101061	0.000460032	0.0457178	3.32709e-05	0.0108069
cg05182555	6645736	9	GLDC	TSS200	Island	0.000488456	0.0470958	2.46771e-05	0.0101681	0.000487799	0.0470958	2.92044e-05	0.00989967
cg04876835	57111099	1	PRKAA2	1stExon	Island	0.000704127	0.0342842	2.47243e-05	0.0101755	0.000634575	0.0342842	4.65915e-05	0.0133161
cg03771840	30140145	6	TRIM15	3'UTR	Island	0.00318602	0.35845	2.47699e-05	0.0101823	0.0026868	0.35845	1.25977e-05	0.00564278
cg16424138	14581771	5	FAM105A	TSS200	Island	0.000963859	0.172576	2.48894e-05	0.0102061	0.00096411	0.172576	2.86672e-05	0.00978155
cg19389884	1358515	11	NA		Island	0.00308241	0.194291	2.48965e-05	0.0102061	0.0024518	0.194291	2.47325e-07	0.000314621
cg04397429	87515419	4	PTPN13	TSS200	Island	0.000365919	0.0251015	2.49153e-05	0.0102061	0.000346281	0.0251015	5.11224e-05	0.0141824
cg06615719	1455513	19	APC2	Body	Island	0.000694841	0.030086	2.50535e-05	0.0102507	0.000707265	0.030086	2.03844e-05	0.00764503
cg17156803	102416598	10	NA		Island	0.00147073	0.186306	2.51585e-05	0.0102816	0.0012813	0.186306	3.05517e-05	0.0101573
cg24880701	68121563	15	SKOR1	Body	Island	0.00199723	0.0685359	2.57744e-05	0.0105211	0.00166115	0.0685359	7.72352e-06	0.00396753
cg02809707	175191069	2	NA		Island	0.00034824	0.0210121	2.58927e-05	0.0105532	0.000324988	0.0210121	5.49005e-05	0.014885
cg16371032	95654541	8	ESRP1	Body	Island	0.000570479	0.04886	2.59135e-05	0.0105532	0.000509134	0.04886	4.48714e-05	0.0130159
cg23804481	79521093	9	PRUNE2	TSS200	Island	0.000354186	0.0339557	2.61525e-05	0.0106382	0.000329596	0.0339557	5.55375e-05	0.0150027
cg20603637	42010142	8	AP3M2	TSS1500	Island	0.000171488	0.0137295	2.62108e-05	0.0106495	0.00017263	0.0137295	2.67063e-05	0.00931463
cg06518628	104513704	8	RIMS2	Body	Island	0.000646771	0.0584689	2.63514e-05	0.0106942	0.000588253	0.0584689	5.29696e-05	0.0144993
cg05783915	119302062	10	EMX2	1stExon	Island	0.00124988	0.0752445	2.64261e-05	0.0107121	0.00113161	0.0752445	5.17531e-05	0.0142893
cg26141626	124406188	7	GPR37	TSS1500	Island	0.000513572	0.0674438	2.65458e-05	0.0107424	0.000461378	0.0674438	4.9059e-05	0.0138292
cg21838979	106681945	2	C2orf40	TSS200	N_Shore	0.00215205	0.25843	2.65623e-05	0.0107424	0.00178299	0.25843	6.81784e-06	0.00367497
cg11052516	87957175	5	LINC00461	Body	Island	0.000810292	0.0784545	2.66146e-05	0.0107511	0.000875337	0.0784545	2.81535e-06	0.00195802
cg03210257	68118127	15	SKOR1	Body	Island	0.000687311	0.0393212	2.66752e-05	0.0107632	0.000635219	0.0393212	5.65028e-05	0.0152164
cg13347257	9594151	3	LHFPL4	Body	Island	0.00107956	0.0547711	2.6713e-05	0.010766	0.000906237	0.0547711	1.20737e-05	0.00546404
cg04739123	177502854	2	NA		Island	0.000713567	0.0467712	2.67647e-05	0.0107745	0.000739695	0.0467712	1.37166e-05	0.00594305
cg15425280	158141492	4	GRIA2	TSS1500	Island	0.00157234	0.180142	2.68238e-05	0.0107852	0.00134665	0.180142	2.28095e-05	0.00827706
cg03724463	42306524	3	CCK	TSS200	Island	0.00142064	0.107667	2.68531e-05	0.0107852	0.00118621	0.107667	9.86343e-06	0.00476586
cg07876132	39851380	3	MYRIP	1stExon	Island	0.000675403	0.0423477	2.70736e-05	0.0108613	0.000589553	0.0423477	3.47421e-05	0.0110184
cg14181169	36003074	14	INSM2	TSS200	Island	0.000388472	0.0313582	2.71945e-05	0.0108915	0.000374645	0.0313582	4.95318e-05	0.0138823
cg04085822	2521840	16	NTN3	1stExon	Island	0.00085533	0.030583	2.72111e-05	0.0108915	0.000807443	0.030583	5.62681e-05	0.0151649
cg04741853	44037189	3	NA		Island	0.00019958	0.0228424	2.72991e-05	0.0109103	0.000193652	0.0228424	4.69213e-05	0.0133795
cg14068328	85474087	6	TBX18	TSS200	Island	0.00162249	0.165188	2.73204e-05	0.0109103	0.00131573	0.165188	2.01124e-06	0.00152227
cg05194810	172950397	2	DLX1	5'UTR	N_Shore	0.00125197	0.112667	2.73991e-05	0.0109292	0.00123228	0.112667	4.02027e-05	0.0121555
cg07068756	41258910	4	UCHL1	1stExon	Island	0.000522873	0.0304112	2.76421e-05	0.0110021	0.000483658	0.0304112	5.86096e-05	0.0155719
cg05568490	56932714	18	NA		Island	0.000762855	0.0624206	2.76447e-05	0.0110021	0.000682594	0.0624206	4.95358e-05	0.0138823
cg05080154	76739409	18	SALL3	TSS1500	Island	0.00178465	0.0715011	2.7925e-05	0.011101	0.00152299	0.0715011	2.19838e-05	0.00810378
cg02748419	141868612	3	NA		Island	0.00170728	0.117691	2.79643e-05	0.011104	0.0017656	0.117691	1.53789e-05	0.00631812
cg15384598	24045549	14	JPH4	Body	Island	0.000509511	0.0215181	2.80181e-05	0.0111128	0.000497442	0.0215181	4.52807e-05	0.0130769
cg00129196	20190016	2	WDR35	TSS200	Island	0.00140399	0.115081	2.81024e-05	0.0111336	0.00152861	0.115081	2.01475e-06	0.00152227
cg03555227	170289070	5	RANBP17	Body	Island	0.00250355	0.353952	2.82219e-05	0.0111598	0.00205956	0.353952	5.35904e-06	0.00309966
cg23431892	190580589	3	LOC647309	TSS200	Island	0.000551781	0.0309226	2.82325e-05	0.0111598	0.000480834	0.0309226	3.5553e-05	0.0112352
cg23937893	219757464	2	WNT10A	Body	Island	0.000405038	0.0294696	2.82951e-05	0.011172	0.00041929	0.0294696	1.51348e-05	0.00625619
cg00756251	41187367	15	VPS18	Body	S_Shore	0.000326742	0.0327961	2.8387e-05	0.0111956	0.000324399	0.0327961	3.67629e-05	0.0114724
cg00870662	78005665	18	PARD6G	TSS1500	S_Shore	0.000716108	0.0452075	2.84243e-05	0.0111977	0.000678649	0.0452075	5.77937e-05	0.015457
cg22746058	23481176	10	PTF1A	TSS1500	Island	0.0019507	0.141904	2.86073e-05	0.0112571	0.00159441	0.141904	3.80597e-06	0.00241638
cg21878188	67089887	8	CRH	5'UTR	Island	0.000441369	0.0323984	2.87129e-05	0.011286	0.000430995	0.0323984	4.62511e-05	0.0132622
cg18822243	24567687	12	SOX5	5'UTR		-0.00347342	0.721222	2.89203e-05	0.0113547	-0.00341536	0.721222	4.29105e-05	0.012689
cg23802419	145568312	4	HHIP	Body	S_Shore	0.000415159	0.041953	2.90761e-05	0.0114031	0.000383651	0.041953	6.15847e-05	0.0161136
cg24794206	155316492	6	NA		Island	0.000438553	0.0547556	2.91466e-05	0.0114179	0.000435973	0.0547556	3.70065e-05	0.0114993
cg14016177	131965610	9	NA		Island	0.00339837	0.367778	2.91944e-05	0.0114227	0.0028521	0.367778	1.39095e-05	0.00597039
cg15618978	160167990	3	TRIM59	TSS1500	Island	0.0019621	0.164365	2.92563e-05	0.0114227	0.00173189	0.164365	4.53433e-05	0.0130769
cg18074184	48485090	4	SLC10A4	TSS1500	N_Shore	0.00358594	0.481205	2.92568e-05	0.0114227	0.00319635	0.481205	5.08577e-05	0.0141314
cg05409218	27756851	3	NA		Island	0.00123167	0.0650953	2.94437e-05	0.0114829	0.00108234	0.0650953	4.29464e-05	0.012689
cg12123671	170605623	6	NA		Island	0.00193003	0.070816	2.96076e-05	0.0115271	0.00173203	0.070816	5.48737e-05	0.014885
cg21565130	125365004	11	FEZ1	5'UTR	N_Shore	0.00188937	0.111643	2.9623e-05	0.0115271	0.00205943	0.111643	2.03789e-06	0.00152985
cg26752701	50529485	19	VRK3	TSS1500	Island	0.000762374	0.0806872	2.98341e-05	0.0115824	0.000713079	0.0806872	6.30377e-05	0.0164079
cg18032969	145725385	5	NA		Island	0.00157135	0.156284	2.98477e-05	0.0115824	0.00129264	0.156284	6.00702e-06	0.00331967
cg15205547	23514347	7	NA		Island	0.00138796	0.109465	2.98643e-05	0.0115824	0.00144051	0.109465	1.49306e-05	0.0062106
cg27392792	158380886	7	PTPRN2	TSS1500	Island	0.00240374	0.105388	3.00197e-05	0.0116297	0.00207987	0.105388	3.36661e-05	0.0108522
cg17332573	26250934	6	HIST1H2BH	TSS1500	N_Shore	0.00109724	0.0744107	3.00691e-05	0.0116337	0.00111249	0.0744107	2.67332e-05	0.00931473
cg11848563	63788557	1	FOXD3	TSS200	Island	0.000942946	0.123735	3.01006e-05	0.0116337	0.000829058	0.123735	4.44413e-05	0.0129448
cg00910419	60780754	2	BCL11A	TSS200	N_Shore	0.000469871	0.0403248	3.01296e-05	0.0116337	0.000447424	0.0403248	5.96775e-05	0.0157323
cg19306063	135171503	10	FUOM	1stExon	Island	0.000757741	0.0485266	3.02398e-05	0.0116552	0.000795068	0.0485266	1.08058e-05	0.00504018
cg06873316	20690682	11	NELL1	TSS1500	Island	0.000695766	0.0310649	3.02521e-05	0.0116552	0.00062663	0.0310649	5.77498e-05	0.015457
cg21739754	185462847	2	ZNF804A	TSS1500	N_Shore	0.000544116	0.0374146	3.03112e-05	0.0116652	0.000484284	0.0374146	5.21027e-05	0.0143202
cg04084088	33167625	19	RGS9BP	1stExon	Island	0.00151096	0.145649	3.03991e-05	0.0116862	0.0013081	0.145649	3.46081e-05	0.0110162
cg09567439	60297694	15	FOXB1	Body	Island	0.00138667	0.139725	3.05077e-05	0.011715	0.00132952	0.139725	5.78951e-05	0.0154723
cg19673664	28806468	6	NA		N_Shore	0.000286146	0.0173884	3.07639e-05	0.0118005	0.000310522	0.0173884	2.71402e-06	0.00190649
cg26718511	25652531	6	SCGN	1stExon	Island	0.00109162	0.091589	3.09561e-05	0.0118612	0.000917362	0.091589	1.60712e-05	0.00652218
cg03290400	100903909	6	SIM1	Body	N_Shore	0.000844877	0.083632	3.1136e-05	0.011917	0.000758778	0.083632	5.83403e-05	0.0155352
cg07189157	149119407	7	NA		Island	0.000902025	0.0805312	3.1189e-05	0.0119243	0.000953387	0.0805312	8.70048e-06	0.00434087
cg26936429	85473171	6	TBX18	Body	Island	0.000760871	0.0743295	3.13047e-05	0.0119364	0.000674192	0.0743295	5.14808e-05	0.0142435
cg00925096	16461062	7	ISPD	TSS200	Island	0.00104622	0.0235307	3.13087e-05	0.0119364	0.000983931	0.0235307	6.5291e-05	0.0167575
cg09472360	61547130	3	PTPRG	TSS200	Island	0.000859789	0.034143	3.13369e-05	0.0119364	0.000807639	0.034143	6.55575e-05	0.0167767
cg01986605	127348155	3	PODXL2	Body	Island	0.000118398	0.0147207	3.13803e-05	0.0119364	0.000112744	0.0147207	6.13557e-05	0.0160778
cg21446511	179316481	2	PRKRA	TSS1500	Island	0.000418576	0.0332444	3.13914e-05	0.0119364	0.000383417	0.0332444	6.53872e-05	0.0167699
cg00302494	237080354	2	NA		Island	0.00117251	0.193548	3.15284e-05	0.0119755	0.00113058	0.193548	5.72147e-05	0.0153815
cg18338311	32907939	17	TMEM132E	1stExon	Island	0.000794275	0.0679638	3.15874e-05	0.0119849	0.000711987	0.0679638	5.83681e-05	0.0155352
cg19560758	8086721	1	ERRFI1	TSS1500	Island	0.00184162	0.162692	3.16915e-05	0.0119965	0.00145196	0.162692	2.01434e-07	0.000265913
cg17495912	37006340	13	CCNA1	5'UTR	Island	0.00110299	0.0435965	3.17028e-05	0.0119965	0.00107604	0.0435965	5.14429e-05	0.0142435
cg22242764	93631623	15	RGMA	Body	Island	0.000790976	0.0735829	3.17207e-05	0.0119965	0.00072478	0.0735829	6.6206e-05	0.0169179
cg10899637	122042703	2	TFCP2L1	5'UTR	Island	0.00027743	0.0244926	3.17659e-05	0.0120006	0.000262589	0.0244926	6.45877e-05	0.0166626
cg07447260	103600544	10	KCNIP2	Body	N_Shelf	0.00034492	0.0314242	3.18635e-05	0.0120135	0.000383729	0.0314242	6.17016e-07	0.000602928
cg21684012	100912906	6	SIM1	TSS1500	Island	0.00111752	0.0614645	3.19105e-05	0.0120135	0.000959078	0.0614645	3.06461e-05	0.0101619
cg06676637	56940333	18	RAX	1stExon	Island	0.00167902	0.176411	3.19237e-05	0.0120135	0.00137317	0.176411	5.02509e-06	0.00293894
cg27344859	61808313	20	NA		Island	0.0011347	0.0647032	3.19374e-05	0.0120135	0.000971343	0.0647032	2.88867e-05	0.00983006
cg18485193	16936369	5	MYO10	1stExon	Island	0.000636087	0.0230768	3.21513e-05	0.0120683	0.00058488	0.0230768	6.76871e-05	0.0171461
cg04735948	4661664	16	UBALD1	Body	N_Shelf	0.00231656	0.718534	3.2176e-05	0.0120683	0.00213172	0.718534	6.78695e-05	0.0171571
cg27581028	63277327	2	OTX1	TSS1500	Island	0.000266857	0.0206013	3.21865e-05	0.0120683	0.000276461	0.0206013	1.69983e-05	0.00678043
cg11566061	119810066	4	SYNPO2	1stExon		0.000108044	0.0161893	3.22975e-05	0.0120883	0.000103039	0.0161893	6.23969e-05	0.0163139
cg06829830	80256087	5	RASGRF2	TSS1500	Island	0.000864478	0.0447283	3.23435e-05	0.0120883	0.000773734	0.0447283	5.91481e-05	0.0156517
cg05121480	187387601	3	SST	Body	N_Shore	0.00158671	0.0914711	3.23461e-05	0.0120883	0.00127198	0.0914711	1.26665e-06	0.0010729
cg10426464	62457529	15	C2CD4B	TSS200	Island	0.0010592	0.0254869	3.2404e-05	0.0120883	0.00110214	0.0254869	1.51475e-05	0.00625619
cg14205321	100050662	6	NA		N_Shore	0.00112411	0.106278	3.24127e-05	0.0120883	0.00109966	0.106278	5.09573e-05	0.0141478
cg07005294	23572029	8	NA		Island	0.000381691	0.0239802	3.25432e-05	0.012124	0.000328474	0.0239802	3.34342e-05	0.0108442
cg16564824	10199536	20	SNAP25	1stExon	N_Shore	0.000654689	0.0457574	3.26514e-05	0.0121514	0.000589863	0.0457574	6.28999e-05	0.0164079
cg19470159	167967842	3	EGFEM1P	Body	Island	0.000554346	0.0440456	3.26897e-05	0.0121527	0.000472897	0.0440456	2.73773e-05	0.00946374
cg22719623	154360732	6	OPRM1	1stExon	Island	0.00205637	0.401612	3.28883e-05	0.0122121	0.00168899	0.401612	6.7614e-06	0.00365017
cg10993336	207627941	1	CR2	Body	Island	0.000578343	0.0477587	3.29465e-05	0.0122121	0.000579544	0.0477587	3.66297e-05	0.011463
cg23368787	36049342	19	ATP4A	Body	Island	0.00233872	0.338596	3.29896e-05	0.0122121	0.00189572	0.338596	3.11442e-06	0.0020952
cg08315770	39281885	6	KCNK17	1stExon	Island	0.00203111	0.0997119	3.30214e-05	0.0122121	0.00169947	0.0997119	1.534e-05	0.00631331
cg14035550	10861421	2	ATP6V1C2	TSS1500	Island	0.00045913	0.0318454	3.30398e-05	0.0122121	0.000429369	0.0318454	6.96777e-05	0.0175108
cg15720043	77590513	8	LOC100192378	Body	S_Shore	0.000957347	0.0650773	3.3059e-05	0.0122121	0.00089314	0.0650773	7.00104e-05	0.0175692
cg13140167	33454504	22	SYN3	TSS200	Island	0.00111307	0.0905504	3.3257e-05	0.0122618	0.00107462	0.0905504	5.95835e-05	0.0157194
cg17906267	95582329	1	TMEM56	TSS1500	N_Shore	0.000950199	0.088673	3.32635e-05	0.0122618	0.00099291	0.088673	1.37268e-05	0.00594305
cg18108008	40254529	1	BMP8B	5'UTR	Island	0.000457561	0.0279794	3.36205e-05	0.0123804	0.000454199	0.0279794	4.35098e-05	0.0128014
cg05758434	207139471	2	ZDBF2	TSS200	Island	0.000189031	0.0206237	3.37663e-05	0.012421	0.000182935	0.0206237	5.89374e-05	0.0156314
cg02486259	37037760	9	NA		Island	0.000651587	0.0582682	3.386e-05	0.0124413	0.000657041	0.0582682	3.35917e-05	0.0108507
cg07364220	55105880	18	ONECUT2	Body	Island	0.00117207	0.133382	3.39321e-05	0.0124413	0.00104168	0.133382	5.83968e-05	0.0155352
cg12144497	28128599	12	NA		S_Shore	0.00107121	0.0657431	3.39564e-05	0.0124413	0.000883866	0.0657431	9.03414e-06	0.00445751
cg04174180	71496383	16	ZNF23	TSS1500	S_Shore	0.000964273	0.0528164	3.39638e-05	0.0124413	0.000893437	0.0528164	7.21639e-05	0.017918
cg10572355	119549145	1	NA		Island	0.00180904	0.191268	3.40492e-05	0.0124413	0.00148923	0.191268	8.13813e-06	0.00413197
cg06470822	28175283	6	NA		Island	0.0012891	0.0890137	3.40595e-05	0.0124413	0.00116326	0.0890137	6.65282e-05	0.0169754
cg17784403	94128527	6	EPHA7	Body	Island	0.00191082	0.111504	3.40707e-05	0.0124413	0.00155432	0.111504	4.21847e-06	0.00258866
cg20580088	62161583	14	HIF1A	TSS1500	N_Shore	0.00166684	0.281914	3.41888e-05	0.0124715	0.00175999	0.281914	1.00442e-05	0.00481333
cg15822346	111408761	6	SLC16A10	TSS200	Island	0.000730962	0.0616633	3.43016e-05	0.0124922	0.000754141	0.0616633	2.03896e-05	0.00764503
cg25130385	135646027	9	AK8	Body	Island	0.00163626	0.20225	3.43171e-05	0.0124922	0.00145369	0.20225	5.89305e-05	0.0156314
cg23620822	13692212	3	LOC285375	TSS200		0.000818815	0.043111	3.4444e-05	0.0125198	0.000864062	0.043111	1.03428e-05	0.00489605
cg16487280	42295503	20	MYBL2	TSS1500	Island	0.00082721	0.0944923	3.44646e-05	0.0125198	0.000821605	0.0944923	4.4215e-05	0.0129077
cg23217512	70877866	15	NA		Island	0.00123565	0.0641405	3.4512e-05	0.012524	0.00110392	0.0641405	6.2572e-05	0.0163353
cg14767442	138654993	3	NA		Island	0.00139552	0.17989	3.45853e-05	0.0125377	0.00152021	0.17989	2.62005e-06	0.00185539
cg01764082	98784014	9	LINC00092	Body	Island	0.000478874	0.0314215	3.47568e-05	0.0125776	0.000450074	0.0314215	7.23871e-05	0.0179513
cg14973588	28366427	13	GSX1	TSS1500	N_Shore	0.00218268	0.18963	3.48031e-05	0.0125776	0.00197246	0.18963	6.86908e-05	0.0173078
cg04926134	165478252	2	GRB14	1stExon	Island	0.00113301	0.0750364	3.48034e-05	0.0125776	0.000956302	0.0750364	2.23514e-05	0.00821334
cg16407471	43602914	11	MIR129-2	TSS200	Island	0.000730835	0.054154	3.48694e-05	0.0125885	0.000623182	0.054154	2.9739e-05	0.00999425
cg02320481	110438578	13	IRS2	5'UTR	Island	0.00244189	0.118576	3.50329e-05	0.0126283	0.00204093	0.118576	1.6296e-05	0.00658287
cg00059225	151304357	5	GLRA1	1stExon	Island	0.00215929	0.387878	3.50519e-05	0.0126283	0.00169182	0.387878	1.29453e-07	0.000193531
cg05406635	100069666	14	CCDC85C	1stExon	Island	0.0023074	0.254092	3.51536e-05	0.0126519	0.00223729	0.254092	6.04499e-05	0.0159
cg12478381	26565249	22	SEZ6L	TSS1500	Island	0.000585041	0.0469649	3.53043e-05	0.0126746	0.000493853	0.0469649	2.29224e-05	0.00830109
cg16045612	158758490	5	IL12B	TSS1500	Island	0.000381106	0.0399784	3.53253e-05	0.0126746	0.00038155	0.0399784	3.98379e-05	0.0120765
cg04630810	4662735	9	SPATA6L	Body	Island	0.000406877	0.0330544	3.53255e-05	0.0126746	0.000432666	0.0330544	8.03881e-06	0.00409343
cg04911280	44281184	6	AARS2	TSS200	Island	0.000767783	0.0626015	3.54966e-05	0.012723	0.000769681	0.0626015	3.91744e-05	0.0119389
cg25988317	61051667	20	GATA5	TSS1500	Island	0.000591918	0.0546806	3.55733e-05	0.0127374	0.000528382	0.0546806	6.42278e-05	0.0165942
cg16483916	5567758	19	TINCR	Body	Island	0.00158661	0.182802	3.56484e-05	0.0127513	0.00124812	0.182802	2.39711e-07	0.000308298
cg11880727	63512265	14	KCNH5	5'UTR	Island	0.00102785	0.0642457	3.56927e-05	0.0127539	0.000900696	0.0642457	5.20931e-05	0.0143202
cg08660876	154681323	4	RNF175	5'UTR	Island	0.0014182	0.200613	3.57288e-05	0.0127539	0.00132422	0.200613	7.54973e-05	0.0184995
cg01410359	38302230	2	CYP1B1	Body	Island	0.00158486	0.234573	3.59517e-05	0.0128204	0.0013879	0.234573	5.20723e-05	0.0143202
cg24678505	56882429	12	GLS2	TSS1500	Island	0.000546349	0.0412429	3.5994e-05	0.0128224	0.000528162	0.0412429	6.35207e-05	0.0164968
cg23243463	35146454	18	CELF4	TSS1500	Island	0.00128742	0.0819561	3.62419e-05	0.0128976	0.00110781	0.0819561	3.86714e-05	0.0118565
cg24903434	75831232	7	SRRM3	5'UTR	Island	0.00018782	0.0183619	3.62958e-05	0.0129031	0.000186781	0.0183619	4.54278e-05	0.0130837
cg09079909	127808092	7	NA		Island	0.000812158	0.0801677	3.63311e-05	0.0129031	0.000721778	0.0801677	6.30847e-05	0.0164079
cg16964025	157482215	7	PTPRN2	Body	Island	0.00142911	0.105268	3.65434e-05	0.0129616	0.00113961	0.105268	1.13908e-06	0.000983905
cg26640467	126893304	7	GRM8	TSS1500	Island	0.0007384	0.0534113	3.65698e-05	0.0129616	0.000747614	0.0534113	3.35318e-05	0.0108503
cg00292135	156433068	7	LINC01006	Body	Island	0.00110622	0.0636106	3.68174e-05	0.0130361	0.00103065	0.0636106	7.79875e-05	0.0188606
cg25799994	166650699	2	GALNT3	5'UTR	Island	0.000614069	0.0562762	3.69243e-05	0.0130607	0.000652881	0.0562762	8.54213e-06	0.00429965
cg24578124	497828	19	MADCAM1	Body	Island	0.00106111	0.144114	3.69619e-05	0.0130608	0.000969699	0.144114	7.68833e-05	0.0186553
cg24969942	61468728	10	SLC16A9	5'UTR	Island	0.000331633	0.0227606	3.71705e-05	0.0131213	0.00030722	0.0227606	7.88583e-05	0.0189469
cg03940098	26188908	20	MIR663A	Body	Island	0.00242348	0.288853	3.72122e-05	0.0131228	0.00198539	0.288853	7.64941e-06	0.00395268
cg06645033	50890678	1	NA		Island	0.00222377	0.238311	3.76379e-05	0.0132595	0.00197169	0.238311	6.41413e-05	0.0165841
cg11171429	121844284	4	PRDM5	TSS1500	S_Shore	0.000138975	0.010256	3.8053e-05	0.0133794	0.000132725	0.010256	7.28587e-05	0.0180037
cg23235154	159290589	6	NA		N_Shore	0.00110642	0.0652983	3.80546e-05	0.0133794	0.00119362	0.0652983	4.82431e-06	0.00284633
cg11730703	105167607	14	INF2	5'UTR	N_Shore	-0.000769121	0.94865	3.82685e-05	0.0134411	-0.00073604	0.94865	7.28741e-05	0.0180037
cg24366557	50787650	6	TFAP2B	Body	Island	0.00178313	0.264888	3.85239e-05	0.0135172	0.00151592	0.264888	3.18803e-05	0.0104817
cg07362341	94127983	6	EPHA7	Body	Island	0.000616478	0.0498201	3.87627e-05	0.0135874	0.000514986	0.0498201	1.89894e-05	0.00729827
cg21233722	169064660	5	DOCK2	Body	Island	0.00135491	0.137273	3.88769e-05	0.0136138	0.00148937	0.137273	1.87011e-06	0.0014368
cg17696160	37136192	14	PAX9	Body	Island	0.00136405	0.0707556	3.90756e-05	0.0136644	0.00121613	0.0707556	7.0588e-05	0.0176761
cg12392473	48099331	20	KCNB1	TSS200	Island	0.00135516	0.064526	3.90997e-05	0.0136644	0.00114348	0.064526	2.65777e-05	0.00929756
cg08583049	60296815	15	FOXB1	5'UTR	Island	0.00113218	0.12488	3.9158e-05	0.0136711	0.00106825	0.12488	8.02748e-05	0.0191165
cg07477009	96705395	13	UGGT2	Body	Island	0.000886502	0.0405287	3.93768e-05	0.0137338	0.00073717	0.0405287	1.65137e-05	0.00664014
cg23605843	26735630	1	NA		N_Shore	0.00195578	0.206084	3.96281e-05	0.0138077	0.00178245	0.206084	8.19036e-05	0.0194383
cg16498194	130647874	12	FZD10	1stExon	Island	0.00280643	0.26258	3.98741e-05	0.0138796	0.00274399	0.26258	6.25559e-05	0.0163353
cg01497613	48041301	17	NA		Island	0.00123721	0.102025	3.99362e-05	0.0138874	0.0011354	0.102025	8.41031e-05	0.0197063
cg17639046	14204027	17	HS3ST3B1	TSS1500	N_Shore	0.000439264	0.0404697	3.9977e-05	0.0138878	0.000450534	0.0404697	2.77155e-05	0.00955542
cg12567315	16793634	7	TSPAN13	1stExon	Island	0.000387572	0.0452821	4.01374e-05	0.0139297	0.000371074	0.0452821	7.59848e-05	0.0185366
cg04408488	28494116	13	PDX1	TSS200	Island	0.00124826	0.099388	4.0233e-05	0.0139388	0.00106403	0.099388	3.62437e-05	0.0113712
cg09696159	138655775	3	NA		N_Shore	0.00153969	0.264084	4.02434e-05	0.0139388	0.0014302	0.264084	8.53976e-05	0.0199162
cg13914893	137980958	9	OLFM1	Body	S_Shore	0.00107623	0.0777009	4.02951e-05	0.0139429	0.000971814	0.0777009	7.99487e-05	0.0190519
cg24937280	112823756	5	MCC	Body	Island	0.00115785	0.0686532	4.0602e-05	0.0140104	0.000971753	0.0686532	2.39621e-05	0.00860462
cg01592801	99438942	8	KCNS2	TSS1500	Island	0.00112293	0.13462	4.06063e-05	0.0140104	0.00106066	0.13462	8.27969e-05	0.0195574
cg04846036	8079205	10	NA		S_Shore	0.00174796	0.205873	4.06104e-05	0.0140104	0.00146064	0.205873	2.07764e-05	0.00774852
cg07755390	124931736	3	SLC12A8	TSS200	Island	0.00118898	0.072722	4.07435e-05	0.0140425	0.00102836	0.072722	4.98632e-05	0.0139398
cg24563197	176961552	2	NA		N_Shore	0.000499651	0.0415682	4.08129e-05	0.0140526	0.000491497	0.0415682	5.94881e-05	0.015706
cg21229268	34442350	21	OLIG1	TSS200	Island	0.00125855	0.0585227	4.08802e-05	0.0140619	0.00103062	0.0585227	9.10008e-06	0.00447113
cg03000358	52456381	1	RAB3B	TSS200	Island	0.000318204	0.0454881	4.09363e-05	0.0140674	0.000309775	0.0454881	6.71227e-05	0.0170649
cg15504461	147140880	3	NA		N_Shore	0.00258204	0.383502	4.09888e-05	0.0140703	0.00236377	0.383502	8.59191e-05	0.0199978
cg13645908	714733	17	NXN	Body	S_Shore	-0.000647657	0.953416	4.10252e-05	0.0140703	-0.000600847	0.953416	8.70752e-05	0.020173
cg09865339	99774935	7	GPC2	1stExon	Island	0.000162521	0.0149368	4.11446e-05	0.0140974	0.00015963	0.0149368	6.07458e-05	0.0159538
cg19885761	175223646	5	CPLX2	5'UTR	Island	0.00191661	0.111994	4.13075e-05	0.0141169	0.0015243	0.111994	1.30319e-06	0.00109065
cg02662828	48492848	4	ZAR1	1stExon	Island	0.00284233	0.456052	4.13214e-05	0.0141169	0.00257432	0.456052	8.34037e-05	0.0196874
cg17110767	243637966	1	SDCCAG8	Body	Island	0.000549447	0.973236	4.13227e-05	0.0141169	0.000554028	0.973236	4.1025e-05	0.0123508
cg00105628	21087165	20	NA		Island	0.00195597	0.233761	4.15226e-05	0.0141714	0.00160664	0.233761	1.08853e-05	0.00506379
cg08286012	81257041	4	C4orf22	Body	Island	0.000591958	0.0501097	4.15652e-05	0.0141721	0.000546397	0.0501097	8.81753e-05	0.0203587
cg14482684	30051176	18	GAREM	TSS1500	Island	0.000317755	0.0172438	4.17459e-05	0.0142199	0.000318352	0.0172438	4.63976e-05	0.0132824
cg16717713	100069657	14	CCDC85C	1stExon	Island	0.00263369	0.262949	4.18155e-05	0.0142215	0.00256602	0.262949	6.8031e-05	0.0171834
cg13974192	53775410	13	NA		Island	0.0026585	0.15339	4.1832e-05	0.0142215	0.00214598	0.15339	4.22531e-06	0.00258866
cg21286402	116519532	1	SLC22A15	Body	Island	0.00108035	0.0732767	4.19927e-05	0.0142623	0.00103366	0.0732767	7.97871e-05	0.0190383
cg03388293	28366645	13	GSX1	TSS200	Island	0.000661414	0.0550721	4.20814e-05	0.0142669	0.000578226	0.0550721	6.15559e-05	0.0161136
cg08179907	107798967	11	RAB39A	TSS1500	Island	0.000775083	0.0800691	4.2088e-05	0.0142669	0.000823546	0.0800691	1.02495e-05	0.00487582
cg05530568	158526614	5	EBF1	1stExon	N_Shore	0.00132465	0.0827038	4.22344e-05	0.0143027	0.00140356	0.0827038	1.13894e-05	0.00524941
cg14685796	50265660	5	NA		Island	0.00135067	0.110183	4.23363e-05	0.0143233	0.00118307	0.110183	6.36975e-05	0.0165305
cg26187308	70947440	8	NA		S_Shore	0.000628985	0.0452892	4.24538e-05	0.0143492	0.000606636	0.0452892	7.5901e-05	0.0185366
cg25585523	186524693	3	RFC4	TSS1500	Island	0.000533143	0.0420471	4.25347e-05	0.0143627	0.000566906	0.0420471	1.00909e-05	0.00481589
cg09486406	241771855	2	NA		Island	0.000517625	0.0417822	4.27175e-05	0.0143817	0.000523668	0.0417822	3.98322e-05	0.0120765
cg17554604	140774522	7	NA		Island	0.0012753	0.0858563	4.27255e-05	0.0143817	0.00113386	0.0858563	7.6114e-05	0.0185422
cg03399905	79576060	15	ANKRD34C	5'UTR	Island	0.000935914	0.0615548	4.27296e-05	0.0143817	0.000796296	0.0615548	3.77933e-05	0.0116465
cg18219563	27487458	2	SLC30A3	TSS1500	Island	0.000371286	0.0322409	4.27555e-05	0.0143817	0.00035177	0.0322409	8.57762e-05	0.0199778
cg05500840	176972068	2	HOXD11	TSS200	Island	0.00202758	0.0931232	4.28557e-05	0.0144016	0.00161314	0.0931232	1.50569e-06	0.00121366
cg13102585	42386208	17	RUNDC3A	1stExon	Island	0.000878189	0.080276	4.3012e-05	0.0144292	0.000725262	0.080276	1.47654e-05	0.0061953
cg02305765	53107910	12	NA		N_Shore	0.00208768	0.109629	4.30204e-05	0.0144292	0.00185302	0.109629	7.55156e-05	0.0184995
cg26961808	128470913	7	FLNC	1stExon	Island	0.000690329	0.0314659	4.31643e-05	0.0144636	0.000733091	0.0314659	1.07794e-05	0.00504018
cg02799448	137817008	6	OLIG3	TSS1500	Island	0.000630665	0.0698259	4.33941e-05	0.0145267	0.000624747	0.0698259	5.74892e-05	0.0154227
cg26504274	2485409	11	KCNQ1	Body		-0.000153584	0.992376	4.36371e-05	0.0145939	-0.000152882	0.992376	5.34877e-05	0.0146183
cg14614094	133567903	9	EXOSC2	TSS1500	N_Shore	0.00179786	0.693274	4.36824e-05	0.0145939	0.00151369	0.693274	2.96205e-05	0.0099923
cg11958643	82770598	5	VCAN	5'UTR	Island	0.000432954	0.0329526	4.372e-05	0.0145939	0.000424026	0.0329526	6.70026e-05	0.0170591
cg00337662	68113328	15	NA		Island	0.00072236	0.0298519	4.40015e-05	0.0146688	0.000588576	0.0298519	8.21617e-06	0.00415952
cg26129417	134527034	5	NA		Island	0.00100734	0.119893	4.40282e-05	0.0146688	0.00096974	0.119893	7.98142e-05	0.0190383
cg02106850	85474093	6	TBX18	TSS200	Island	0.00216532	0.131139	4.41891e-05	0.0147084	0.00178456	0.131139	1.42521e-05	0.00606915
cg02551244	23608357	2	KLHL29	5'UTR	Island	0.000339179	0.0421588	4.44668e-05	0.0147867	0.00033015	0.0421588	7.2779e-05	0.0180037
cg23017840	37576442	9	FBXO10	TSS200	Island	0.000446222	0.0335172	4.48572e-05	0.0149024	0.000414053	0.0335172	9.50942e-05	0.0214761
cg06966811	57276789	14	OTX2	5'UTR	Island	0.0021374	0.289143	4.4943e-05	0.0149167	0.00177979	0.289143	2.18461e-05	0.00807003
cg05366118	144853908	8	NA		Island	0.000437954	0.0256504	4.50401e-05	0.0149348	0.000431003	0.0256504	6.50381e-05	0.0167173
cg13021384	50474754	15	SLC27A2	1stExon	Island	0.000380997	0.030516	4.51655e-05	0.0149385	0.000403839	0.030516	1.21633e-05	0.00549744
cg20321756	111848400	11	DIXDC1	1stExon	Island	0.00144996	0.109263	4.51677e-05	0.0149385	0.0012834	0.109263	7.76743e-05	0.0188045
cg23596567	11901585	17	ZNF18	TSS1500	S_Shore	0.00373482	0.69697	4.51794e-05	0.0149385	0.00330225	0.69697	7.68568e-05	0.0186553
cg04158367	92952440	1	GFI1	TSS1500	Island	0.00234253	0.0874085	4.52313e-05	0.0149415	0.0020547	0.0874085	7.02219e-05	0.0176055
cg09784307	75248768	15	RPP25	1stExon	Island	0.00120349	0.111988	4.53032e-05	0.0149512	0.00132232	0.111988	2.41209e-06	0.00174341
cg10526277	157813363	3	NA		S_Shore	0.00168951	0.129322	4.54495e-05	0.0149799	0.00143369	0.129322	3.8785e-05	0.0118601
cg12009759	100111896	14	HHIPL1	Body	Island	0.000316684	0.0273377	4.55186e-05	0.0149799	0.000271569	0.0273377	4.90073e-05	0.0138258
cg04527868	43253555	22	ARFGAP3	TSS200	Island	0.00136652	0.0887529	4.55188e-05	0.0149799	0.00118504	0.0887529	6.01185e-05	0.0158366
cg08307816	100626192	14	DEGS2	TSS200	Island	0.000909969	0.0598013	4.62448e-05	0.0151812	0.000921345	0.0598013	4.24919e-05	0.0126294
cg19488874	175193551	2	NA		Island	0.000882983	0.085584	4.62748e-05	0.0151812	0.000769005	0.085584	6.55375e-05	0.0167767
cg01937780	72596939	5	NA		S_Shore	0.00150539	0.126455	4.62751e-05	0.0151812	0.00130238	0.126455	5.90586e-05	0.0156517
cg04428700	27239556	7	HOXA13	1stExon	Island	0.000356834	0.0387881	4.63039e-05	0.0151812	0.000354536	0.0387881	5.86242e-05	0.0155719
cg26009035	113341711	2	CHCHD5	TSS1500	Island	0.0020861	0.179875	4.64058e-05	0.0152003	0.00194125	0.179875	9.81474e-05	0.021829
cg03525049	75232650	8	JPH1	Body	Island	0.000940866	0.0760698	4.67201e-05	0.015289	0.000765841	0.0760698	8.87119e-06	0.0044082
cg19197212	62457456	15	C2CD4B	1stExon	Island	0.00117548	0.0859719	4.68791e-05	0.0153267	0.00113784	0.0859719	8.08768e-05	0.0192207
cg24932788	70118912	17	SOX9	Body	Island	0.000250049	0.0231324	4.7099e-05	0.0153842	0.000225616	0.0231324	9.37634e-05	0.0212854
cg13948585	181451906	1	CACNA1E	TSS1500	Island	0.000920417	0.0646482	4.71933e-05	0.0154006	0.000863401	0.0646482	9.81191e-05	0.021829
cg13323701	118228508	6	SLC35F1	TSS200	Island	0.000371658	0.0221514	4.73534e-05	0.01543	0.000357762	0.0221514	8.55327e-05	0.0199344
cg06644373	200321348	2	SATB2	5'UTR	Island	0.00188748	0.13158	4.73716e-05	0.01543	0.00176054	0.13158	9.98002e-05	0.0220447
cg03571121	2832861	11	KCNQ1	Body	S_Shelf	-0.00177727	0.882946	4.75619e-05	0.0154736	-0.00185549	0.882946	2.10096e-05	0.00781884
cg15562220	25652395	6	SCGN	TSS200	Island	0.00255847	0.196789	4.75938e-05	0.0154736	0.00198644	0.196789	1.33595e-07	0.000197213
cg18759209	55842071	20	BMP7	TSS1500	S_Shore	0.000734861	0.0352262	4.77225e-05	0.015501	0.000641744	0.0352262	7.0708e-05	0.0176808
cg21683009	113346183	11	DRD2	TSS200	Island	0.000532397	0.0389224	4.77823e-05	0.015506	0.000438278	0.0389224	1.57378e-05	0.00643164
cg12878812	119419696	12	SRRM4	1stExon	Island	0.00160275	0.223852	4.79439e-05	0.0155366	0.00128404	0.223852	3.58101e-06	0.00229175
cg22296612	15457699	6	JARID2	Body		-0.000160718	0.990651	4.80056e-05	0.0155366	-0.000158825	0.990651	6.51897e-05	0.0167438
cg21323441	28344349	15	OCA2	5'UTR	Island	0.00030766	0.0346831	4.80099e-05	0.0155366	0.000313163	0.0346831	3.96094e-05	0.012049
cg22162281	207139197	2	ZDBF2	TSS1500	N_Shore	0.00196923	0.133348	4.81569e-05	0.0155698	0.00194095	0.133348	6.80914e-05	0.0171863
cg05056120	158527702	5	EBF1	TSS1500	Island	0.000801628	0.0989425	4.82467e-05	0.0155844	0.000813015	0.0989425	4.29131e-05	0.012689
cg09557313	53313174	13	LECT1	Body	Island	0.000511951	0.0414776	4.83271e-05	0.015596	0.00043819	0.0414776	5.12528e-05	0.0142072
cg27115340	118016769	11	SCN4B	Body	Island	0.00071807	0.0622749	4.85645e-05	0.0156504	0.000728807	0.0622749	4.25679e-05	0.0126412
cg15995695	179334675	1	AXDND1	TSS1500	N_Shore	0.00166276	0.134756	4.85851e-05	0.0156504	0.00186001	0.134756	8.48936e-07	0.000785102
cg21166964	72529816	5	NA		Island	0.00127068	0.174209	4.88668e-05	0.015715	0.0011135	0.174209	7.61128e-05	0.0185422
cg05668372	62734251	20	NA		Island	0.00101438	0.107244	4.88754e-05	0.015715	0.000866717	0.107244	5.02458e-05	0.0139947
cg21911021	58095011	19	ZIK1	TSS1500	Island	0.00322064	0.200524	4.90123e-05	0.0157329	0.00294574	0.200524	0.000102941	0.0224754
cg13378394	50831811	19	KCNC3	1stExon	Island	0.000948577	0.0677437	4.90211e-05	0.0157329	0.000918682	0.0677437	8.40043e-05	0.0197063
cg17303833	97889448	10	ZNF518A	TSS200	N_Shore	0.00164018	0.293635	4.90867e-05	0.0157395	0.00156571	0.293635	9.40617e-05	0.0213072
cg10513328	8028861	17	HES7	TSS1500	Island	0.000434111	0.0299951	4.92671e-05	0.0157636	0.000457014	0.0299951	1.69405e-05	0.0067673
cg04897804	157078629	5	SOX30	1stExon	Island	0.00156705	0.2641	4.92856e-05	0.0157636	0.00164139	0.2641	1.98484e-05	0.00750646
cg27281285	120315368	12	CIT	TSS1500	S_Shore	0.000263393	0.0296074	4.93308e-05	0.0157636	0.000275759	0.0296074	2.00976e-05	0.00756799
cg16318271	41748193	4	PHOX2B	Body	N_Shore	0.00108872	0.057254	4.93419e-05	0.0157636	0.000909125	0.057254	2.80685e-05	0.00962655
cg11260097	121940647	7	NA		Island	0.00177974	0.2129	4.96323e-05	0.0158418	0.00137362	0.2129	6.27119e-08	0.000103973
cg09941452	97557827	7	NA		Island	0.000386095	0.0328097	4.97486e-05	0.0158645	0.000377739	0.0328097	7.67523e-05	0.0186553
cg27523527	91196145	1	NA		S_Shelf	0.00305457	0.356934	4.99263e-05	0.0159067	0.00343648	0.356934	5.7779e-07	0.000574221
cg00338080	75889659	7	SRRM3	Body	Island	0.00158687	0.114579	5.0036e-05	0.0159215	0.00150621	0.114579	9.90057e-05	0.021955
cg16462462	117950825	8	AARD	Body	S_Shore	0.000593278	0.0345241	5.01236e-05	0.0159215	0.00050348	0.0345241	4.47648e-05	0.0129958
cg03499808	73020459	11	ARHGEF17	1stExon	Island	0.00217882	0.0740664	5.01689e-05	0.0159215	0.00181532	0.0740664	2.68388e-05	0.00932084
cg16219603	57360586	8	PENK	TSS1500	Island	0.00115275	0.148723	5.01986e-05	0.0159215	0.000931546	0.148723	6.99366e-06	0.00374017
cg14207210	56833195	17	PPM1E	TSS200	Island	0.000185662	0.0183743	5.02036e-05	0.0159215	0.000188086	0.0183743	4.54792e-05	0.0130837
cg12980128	55105322	18	ONECUT2	Body	Island	0.00121628	0.116453	5.0246e-05	0.0159215	0.00122042	0.116453	5.44135e-05	0.0148259
cg15448975	5894930	4	CRMP1	TSS200	Island	0.00215326	0.175615	5.04964e-05	0.0159777	0.00173526	0.175615	6.01634e-06	0.00331967
cg10785263	63785867	1	NA		Island	0.001162	0.102563	5.05554e-05	0.0159777	0.00104795	0.102563	0.000101108	0.0222453
cg12595013	147128123	3	ZIC1	1stExon	Island	0.00226618	0.13896	5.06463e-05	0.0159777	0.00183092	0.13896	7.05424e-06	0.0037447
cg11716270	39025311	1	NA			0.000865622	0.0646832	5.06484e-05	0.0159777	0.000938307	0.0646832	5.66549e-06	0.00321179
cg22564583	37720976	22	NA		Island	0.000721447	0.0492963	5.06516e-05	0.0159777	0.0006056	0.0492963	3.42654e-05	0.0109427
cg08541521	111506029	1	LRIF1	Body	Island	0.00107081	0.115323	5.14049e-05	0.0162007	0.00119472	0.115323	1.1243e-06	0.00097922
cg09643752	23514246	7	NA		Island	0.000475136	0.0330733	5.147e-05	0.0162066	0.000506309	0.0330733	1.17457e-05	0.00537821
cg14312538	25757710	18	CDH2	TSS1500	Island	0.0018185	0.0493964	5.15178e-05	0.0162071	0.00156773	0.0493964	6.39148e-05	0.0165623
cg19284211	20347495	20	INSM1	TSS1500	Island	0.00168853	0.208781	5.15798e-05	0.016212	0.00144778	0.208781	5.79968e-05	0.0154876
cg09885735	60297747	15	FOXB1	Body	Island	0.00138829	0.125369	5.17129e-05	0.0162274	0.00131732	0.125369	0.000102355	0.0224352
cg22410478	110678956	6	METTL24	Body	Island	0.00127068	0.0659598	5.17214e-05	0.0162274	0.00118619	0.0659598	0.000108605	0.0232657
cg23488804	42393982	17	RUNDC3A	Body	S_Shore	0.00146035	0.176584	5.1772e-05	0.0162287	0.00118568	0.176584	9.71879e-06	0.00471551
cg24532471	82445072	11	FAM181B	TSS200	S_Shore	0.00127351	0.124527	5.2138e-05	0.0163288	0.0012088	0.124527	0.000102989	0.0224754
cg12993163	157821407	3	SHOX2	Body	Island	0.000585696	0.0479541	5.22429e-05	0.016347	0.000570723	0.0479541	8.40661e-05	0.0197063
cg08792677	75379173	11	MAP6	1stExon	Island	0.000382452	0.0616358	5.23834e-05	0.0163625	0.000375071	0.0616358	7.84717e-05	0.0189235
cg04038179	127806902	7	NA		Island	0.00130522	0.116215	5.24193e-05	0.0163625	0.00110458	0.116215	4.47288e-05	0.0129958
cg03819783	119067637	2	NA			0.000692272	0.0395639	5.24327e-05	0.0163625	0.000678493	0.0395639	7.91665e-05	0.0189765
cg00387704	189838376	3	P3H2	5'UTR	Island	0.00133154	0.0814	5.25795e-05	0.0163937	0.00115382	0.0814	7.1295e-05	0.0177768
cg04293888	7343790	17	FGF11	Body	Island	0.000392025	0.0289044	5.26848e-05	0.0164021	0.000412725	0.0289044	1.82719e-05	0.00714189
cg17231999	41882564	4	NA		Island	0.000671283	0.0476024	5.27003e-05	0.0164021	0.000569057	0.0476024	4.69279e-05	0.0133795
cg08715231	25906064	8	NA		S_Shore	0.00147578	0.294213	5.27513e-05	0.0164034	0.00143482	0.294213	8.68411e-05	0.0201454
cg13788515	207139445	2	ZDBF2	TSS200	Island	0.000372869	0.0258955	5.30763e-05	0.0164898	0.000359003	0.0258955	9.52361e-05	0.0214795
cg24664689	11058690	8	XKR6	1stExon	Island	0.000532706	0.044775	5.33478e-05	0.0165489	0.000571256	0.044775	9.63056e-06	0.0046857
cg22310062	19181025	18	ESCO1	TSS1500	Island	0.00056429	0.0545989	5.34297e-05	0.0165489	0.000605054	0.0545989	9.69543e-06	0.00471072
cg23982858	95941869	12	USP44	5'UTR	N_Shore	0.000344748	0.0274728	5.34579e-05	0.0165489	0.000319896	0.0274728	0.000113072	0.0238717
cg18190187	174871289	5	DRD1	TSS200	Island	0.00092306	0.0247795	5.34678e-05	0.0165489	0.000851793	0.0247795	0.000113479	0.0239172
cg22200289	34175374	19	CHST8	5'UTR	Island	0.00115129	0.0921842	5.35124e-05	0.0165489	0.000934362	0.0921842	1.02176e-05	0.00486974
cg18602928	80747240	17	TBCD	Body		-0.000685511	0.984106	5.35506e-05	0.0165489	-0.000699376	0.984106	4.22862e-05	0.0126111
cg11018337	8095495	10	FLJ45983	TSS200	Island	0.000980645	0.0564703	5.36888e-05	0.0165691	0.00104312	0.0564703	1.32037e-05	0.00578823
cg15112346	43922399	20	MATN4	3'UTR	Island	0.000552733	0.0565195	5.37104e-05	0.0165691	0.000488824	0.0565195	9.38538e-05	0.0212922
cg13327545	22623548	10	NA		Island	0.00269885	0.428786	5.39833e-05	0.0166385	0.00218461	0.428786	9.07319e-06	0.00447048
cg24919972	46037608	3	FYCO1	TSS1500	S_Shore	0.00152406	0.162546	5.4066e-05	0.0166494	0.00147445	0.162546	9.31615e-05	0.0212176
cg10273210	160167665	3	TRIM59	TSS200	Island	0.000383049	0.0435146	5.42284e-05	0.0166847	0.000408321	0.0435146	1.23544e-05	0.00556227
cg09500443	180018465	5	SCGB3A1	5'UTR	Island	0.00222069	0.219608	5.43653e-05	0.0167121	0.00193272	0.219608	7.91986e-05	0.0189765
cg03120185	100054118	6	PRDM13	TSS1500	N_Shore	0.00167492	0.117471	5.45808e-05	0.0167636	0.0014655	0.117471	8.52648e-05	0.0198985
cg09012544	71503562	2	NA		Island	0.00133382	0.0956942	5.46991e-05	0.0167647	0.00141098	0.0956942	1.63558e-05	0.00659181
cg26715952	62996119	6	KHDRBS2	TSS200	Island	0.000917481	0.0469803	5.47291e-05	0.0167647	0.00077798	0.0469803	4.99011e-05	0.0139398
cg17025835	123673331	7	TMEM229A	1stExon	Island	0.000916234	0.0376764	5.48045e-05	0.0167647	0.000813877	0.0376764	9.98606e-05	0.0220447
cg17954152	214160860	1	PROX1	TSS1500	Island	0.00214275	0.17026	5.48084e-05	0.0167647	0.00175424	0.17026	1.6235e-05	0.00656582
cg01684881	42635419	17	FZD2	1stExon	Island	0.000785543	0.049569	5.48239e-05	0.0167647	0.000711085	0.049569	0.000111976	0.0237262
cg06335814	30051251	18	GAREM	TSS1500	Island	0.000336822	0.0272928	5.4987e-05	0.0167999	0.000328745	0.0272928	8.67183e-05	0.0201303
cg24939845	110627473	1	NA		Island	0.000461472	0.0231647	5.51232e-05	0.0168134	0.000480941	0.0231647	2.5972e-05	0.00915644
cg00516222	27949795	17	CORO6	TSS1500	Island	0.000835496	0.0710099	5.51272e-05	0.0168134	0.000824937	0.0710099	7.58496e-05	0.0185366
cg01708552	100815485	7	NAT16	Body	Island	0.000284071	0.0267771	5.52297e-05	0.01683	0.000281945	0.0267771	7.06443e-05	0.0176775
cg20270599	189838996	3	P3H2	5'UTR	S_Shore	0.00196101	0.195379	5.54143e-05	0.0168715	0.00185439	0.195379	0.000111251	0.0236863
cg18596362	70210955	18	CBLN2	5'UTR	Island	0.00101247	0.0467421	5.55322e-05	0.0168776	0.000847761	0.0467421	3.68966e-05	0.0114937
cg19410770	28806514	6	NA		N_Shore	0.000450941	0.0408391	5.55819e-05	0.0168776	0.000447455	0.0408391	7.14164e-05	0.0177805
cg10737891	85504029	4	CDS1	TSS200	Island	0.00021241	0.017208	5.56219e-05	0.0168776	0.000215807	0.017208	4.7731e-05	0.0135279
cg14611683	45452580	1	EIF2B3	TSS1500	S_Shore	0.00226187	0.352559	5.56273e-05	0.0168776	0.00188805	0.352559	3.37769e-05	0.0108603
cg02179499	123358183	10	FGFR2	TSS1500	Island	0.000898145	0.115568	5.62391e-05	0.0170467	0.000839428	0.115568	0.000117547	0.0244622
cg02681442	29236008	14	FOXG1	TSS1500	N_Shore	0.00264683	0.274524	5.62821e-05	0.0170467	0.00238332	0.274524	0.000112453	0.0237555
cg11274314	242480504	2	NA		Island	0.00366852	0.215472	5.63669e-05	0.0170576	0.00323712	0.215472	9.7143e-05	0.0217422
cg24054190	192232863	3	FGF12	Body	Island	0.00154381	0.197537	5.64341e-05	0.0170632	0.00126362	0.197537	1.70367e-05	0.00678801
cg12764034	75602846	1	LHX8	Body	Island	0.00141899	0.093605	5.65466e-05	0.0170824	0.0012049	0.093605	5.39484e-05	0.0147212
cg14991487	176987404	2	HOXD9	TSS200	Island	0.00122716	0.0903102	5.66049e-05	0.0170853	0.00104678	0.0903102	5.94814e-05	0.015706
cg03790899	98971789	15	NA		Island	0.00047835	0.0342659	5.67423e-05	0.0170912	0.000467682	0.0342659	8.77764e-05	0.0203085
cg02680254	34378975	11	ABTB2	TSS200	Island	0.000374921	0.0368018	5.67467e-05	0.0170912	0.000389234	0.0368018	2.97405e-05	0.00999425
cg26942250	101835945	15	SNRPA1	TSS1500	Island	0.000694705	0.0496798	5.67712e-05	0.0170912	0.00063081	0.0496798	0.000117413	0.0244622
cg12018403	55677414	19	DNAAF3	Body	N_Shore	0.00114151	0.077997	5.70063e-05	0.0171473	0.00102474	0.077997	0.000112154	0.0237429
cg22958571	57878526	5	RAB3C	TSS1500	N_Shore	0.000332275	0.0273593	5.70847e-05	0.0171561	0.000323808	0.0273593	9.13538e-05	0.0208603
cg19545623	40752009	4	NSUN7	5'UTR	Island	0.000694886	0.0531892	5.71649e-05	0.0171655	0.000630422	0.0531892	0.000117918	0.0245249
cg19595505	155596322	7	SHH	Body	Island	0.000725972	0.0565227	5.73423e-05	0.017204	0.000631491	0.0565227	8.39199e-05	0.0197063
cg19122206	48972927	22	FAM19A5	Body	Island	0.00206755	0.488465	5.7903e-05	0.0173573	0.00182816	0.488465	0.000102124	0.0224126
cg20800536	58508888	20	NA		Island	0.00122476	0.0626778	5.8015e-05	0.017376	0.00107329	0.0626778	9.33742e-05	0.0212246
cg01514415	6301951	1	NA		Island	0.000301857	0.0232337	5.81455e-05	0.0174002	0.000295237	0.0232337	8.93995e-05	0.020586
cg11806528	113051977	1	WNT2B	Body	Island	0.0010295	0.106807	5.83094e-05	0.0174343	0.000956032	0.106807	0.000123232	0.0253253
cg25603636	140613998	5	PCDHB18P	Body	N_Shore	0.0019114	0.246971	5.85937e-05	0.0175043	0.00160449	0.246971	4.30283e-05	0.0126951
cg08668551	126873181	11	NA		Island	0.00121722	0.0777426	5.88665e-05	0.0175708	0.00106786	0.0777426	9.61795e-05	0.0216234
cg08578136	207139443	2	ZDBF2	TSS200	Island	0.000985366	0.0630601	5.92834e-05	0.0176721	0.000962758	0.0630601	9.22542e-05	0.0210384
cg20771178	8615675	11	STK33	TSS200	Island	0.000681659	0.0427605	5.93318e-05	0.0176721	0.000710844	0.0427605	2.77198e-05	0.00955542
cg05452406	10881891	6	GCM2	Body	Island	0.00173283	0.077484	5.94021e-05	0.0176721	0.00159597	0.077484	0.000126039	0.0257095
cg22937891	114506309	5	TRIM36	Body	Island	0.000302745	0.0404742	5.94439e-05	0.0176721	0.000292378	0.0404742	0.000103419	0.0225124
cg00247557	5197071	18	LOC642597	1stExon	Island	0.00175133	0.147224	5.94582e-05	0.0176721	0.00142271	0.147224	1.34445e-05	0.00587424
cg12246510	79152102	11	TENM4	TSS1500	Island	0.00077199	0.0462507	5.97159e-05	0.0177336	0.000676844	0.0462507	9.7127e-05	0.0217422
cg21553596	42688635	21	FAM3B	TSS200	N_Shore	0.00100084	0.0772788	5.98804e-05	0.0177674	0.000853926	0.0772788	6.45757e-05	0.0166626
cg02624770	28997137	7	TRIL	1stExon	Island	0.00190989	0.133918	6.0404e-05	0.0179075	0.00161977	0.133918	5.7725e-05	0.015457
cg03369269	25745946	13	AMER2	TSS200	Island	0.00126981	0.0636169	6.06361e-05	0.0179611	0.00109924	0.0636169	8.40592e-05	0.0197063
cg04231772	132638571	12	NA		N_Shore	0.00063093	0.0671723	6.07355e-05	0.0179754	0.000629501	0.0671723	7.18517e-05	0.0178647
cg04555220	9546695	5	SEMA5A	TSS1500	Island	0.000499981	0.0322984	6.08757e-05	0.0180016	0.00044495	0.0322984	0.000113814	0.0239417
cg23998119	77600217	14	ZDHHC22	Body		0.00238693	0.232102	6.09834e-05	0.0180182	0.00220526	0.232102	0.000129371	0.0261635
cg00889769	114515341	5	TRIM36	Body	Island	0.00069548	0.0688115	6.10656e-05	0.0180273	0.000628671	0.0688115	0.000124665	0.0255186
cg14940405	142318883	8	NA		Island	0.000634915	0.0439446	6.11307e-05	0.0180299	0.000662679	0.0439446	2.79633e-05	0.00960931
cg00068155	131754131	3	CPNE4	TSS1500	Island	0.00113861	0.0883062	6.12276e-05	0.0180299	0.00111861	0.0883062	8.93832e-05	0.020586
cg16609941	139108945	3	COPB2	TSS1500	Island	-0.000228099	0.0287842	6.12292e-05	0.0180299	-0.000228092	0.0287842	6.97736e-05	0.0175223
cg06248560	35104681	18	CELF4	Body	Island	0.00111213	0.0300559	6.15869e-05	0.018114	0.000976917	0.0300559	0.000102802	0.0224754
cg20482698	236849994	1	ACTN2	1stExon	Island	0.00141598	0.0816049	6.16183e-05	0.018114	0.00123421	0.0816049	9.41027e-05	0.0213072
cg26495109	56225952	16	LOC283856	TSS1500	Island	0.00119444	0.13802	6.18338e-05	0.0181621	0.00101636	0.13802	6.39669e-05	0.0165635
cg11950383	34400072	21	OLIG2	Body	Island	0.00126778	0.113664	6.20099e-05	0.0181986	0.00110538	0.113664	9.51926e-05	0.0214795
cg11028201	41867562	4	NA		Island	0.00246796	0.180746	6.20841e-05	0.0182051	0.00206607	0.180746	4.37651e-05	0.0128544
cg13833596	120302499	2	CFAP221	5'UTR	S_Shore	0.00221458	0.232761	6.23e-05	0.0182531	0.00189558	0.232761	7.24055e-05	0.0179513
cg06697536	177053496	2	HOXD1	1stExon	Island	0.00125465	0.114072	6.25476e-05	0.0183068	0.00108801	0.114072	8.95766e-05	0.0205888
cg13654588	120354081	10	PRLHR	Body	Island	0.00191421	0.193639	6.26387e-05	0.0183068	0.00150465	0.193639	1.69117e-06	0.00132057
cg01663603	48099343	20	KCNB1	TSS200	Island	0.000640016	0.0271815	6.2739e-05	0.0183068	0.000588928	0.0271815	0.000133047	0.0266245
cg13787987	50970591	10	OGDHL	TSS200	Island	0.000636531	0.0528192	6.27589e-05	0.0183068	0.000560136	0.0528192	0.000106966	0.0230132
cg07306881	30051212	18	GAREM	TSS1500	Island	0.000363748	0.0336258	6.2824e-05	0.0183068	0.000320057	0.0336258	0.000106886	0.0230102
cg01500945	51185672	16	SALL1	TSS1500	Island	0.000803867	0.0643605	6.28816e-05	0.0183068	0.000769943	0.0643605	0.000116567	0.0243805
cg05701791	97172825	8	GDF6	1stExon	Island	0.000897659	0.0878204	6.28916e-05	0.0183068	0.000754365	0.0878204	4.937e-05	0.0138823
cg09088508	122231455	12	RHOF	1stExon	Island	0.000697283	0.0587161	6.29685e-05	0.0183068	0.000726416	0.0587161	3.04123e-05	0.0101421
cg02456087	27291541	7	NA		Island	0.000660154	0.0702484	6.3005e-05	0.0183068	0.000579775	0.0702484	0.000105322	0.0227716
cg04223553	153852934	5	NA		N_Shore	0.00225341	0.342504	6.30068e-05	0.0183068	0.00191847	0.342504	6.63733e-05	0.0169482
cg06971092	35291286	17	NA		N_Shore	0.00265006	0.374513	6.31255e-05	0.0183261	0.00227104	0.374513	7.52722e-05	0.0184658
cg09984392	126011784	8	SQLE	1stExon	S_Shore	0.00151798	0.144579	6.32595e-05	0.0183498	0.00139241	0.144579	0.000133929	0.0267267
cg12897942	170626357	3	EIF5A2	1stExon	Island	0.00100154	0.0649936	6.33882e-05	0.0183707	0.00107494	0.0649936	1.15789e-05	0.00532973
cg26256401	44037543	3	NA		Island	0.000294269	0.0250725	6.34365e-05	0.0183707	0.000279647	0.0250725	0.00012334	0.0253253
cg05492839	80657430	6	ELOVL4	TSS200	Island	0.000913372	0.0569881	6.36034e-05	0.0184037	0.000890755	0.0569881	0.00010067	0.022177
cg25390506	135347085	7	C7orf73	TSS200	Island	0.000584482	0.0269894	6.38004e-05	0.018442	0.000617816	0.0269894	2.00851e-05	0.00756799
cg03957108	63276545	2	OTX1	TSS1500	Island	0.00140548	0.157733	6.38409e-05	0.018442	0.00127187	0.157733	0.00013117	0.0264477
cg02498983	88875398	6	CNR1	5'UTR	Island	0.000935126	0.0788107	6.40391e-05	0.018484	0.000817043	0.0788107	0.000101459	0.0223086
cg07963234	5894923	4	CRMP1	TSS200	Island	0.00197556	0.089333	6.4119e-05	0.0184918	0.0015849	0.089333	8.17725e-06	0.00414582
cg24472939	175139486	4	NA		S_Shelf	0.000577811	0.0439555	6.42743e-05	0.0185213	0.000547963	0.0439555	0.000126469	0.0257672
cg10732215	22625465	10	NA		Island	0.00135699	0.0627437	6.43763e-05	0.0185308	0.00148271	0.0627437	5.38958e-06	0.0031026
cg10836392	44258132	22	SULT4A1	1stExon	Island	0.00332866	0.233446	6.44134e-05	0.0185308	0.00268316	0.233446	1.08021e-05	0.00504018
cg13500074	60780746	2	BCL11A	TSS200	N_Shore	0.000291279	0.0335837	6.44738e-05	0.018533	0.000290136	0.0335837	7.8014e-05	0.0188606
cg12523526	2756005	5	NA		Island	0.000455141	0.0321033	6.45643e-05	0.0185437	0.000395786	0.0321033	9.66042e-05	0.0216911
cg22469804	171131904	3	TNIK	Body		-0.000396419	0.977025	6.47404e-05	0.0185775	-0.000411874	0.977025	3.36403e-05	0.0108522
cg22598841	113615267	1	LRIG2	TSS1500	N_Shore	0.00076754	0.0667347	6.4788e-05	0.0185775	0.00075549	0.0667347	9.22306e-05	0.0210384
cg00708380	75378502	11	MAP6	Body	Island	0.000289983	0.0232009	6.50435e-05	0.0186273	0.000279388	0.0232009	0.000114957	0.0241242
cg06419750	129337910	12	GLT1D1	TSS200	Island	0.00191518	0.140785	6.50684e-05	0.0186273	0.00171859	0.140785	0.00012898	0.0261531
cg05206884	33454324	22	SYN3	5'UTR	Island	0.000793422	0.0448547	6.54963e-05	0.0187345	0.000715863	0.0448547	0.000133189	0.0266245
cg08748615	39957298	1	BMP8A	TSS200	Island	0.000259575	0.0158865	6.5568e-05	0.0187397	0.00025306	0.0158865	0.000103821	0.0225585
cg18710929	118228078	6	SLC35F1	TSS1500	Island	0.000446046	0.0414074	6.59758e-05	0.0188409	0.000431651	0.0414074	0.000112326	0.0237429
cg15485728	79521359	9	PRUNE2	TSS1500	Island	0.00150712	0.115099	6.64394e-05	0.0189578	0.00120048	0.115099	5.71533e-06	0.00322122
cg01429360	23509546	7	IGF2BP3	Body	Island	0.000450519	0.0590329	6.66464e-05	0.0190013	0.000422108	0.0590329	0.00013767	0.0271786
cg08648568	33767797	18	MOCOS	Body	Island	0.000315619	0.0257095	6.70451e-05	0.0190995	0.000297573	0.0257095	0.000135248	0.0269285
cg26394220	219867925	2	MIR375	TSS1500	Island	0.000379411	0.029202	6.73813e-05	0.0191796	0.000342484	0.029202	0.000137364	0.027173
cg04606861	132905735	12	GALNT9	1stExon	Island	0.00182213	0.172333	6.7592e-05	0.019215	0.00143753	0.172333	2.95802e-06	0.00202108
cg10640845	1775211	19	ONECUT3	Body	Island	0.00177454	0.165983	6.76157e-05	0.019215	0.00150084	0.165983	6.38955e-05	0.0165623
cg11876574	1757113	19	ONECUT3	Body	N_Shore	0.000859603	0.0798413	6.82129e-05	0.019369	0.000781754	0.0798413	0.000142546	0.027905
cg02781618	42153695	4	BEND4	Body	Island	0.000758783	0.0774836	6.85914e-05	0.0194607	0.000722612	0.0774836	0.000131488	0.0264966
cg26386740	60781129	2	BCL11A	TSS1500	Island	0.000208422	0.0150709	6.88258e-05	0.0195114	0.000210303	0.0150709	6.73597e-05	0.0171003
cg06475764	47177480	16	NETO2	Body	Island	0.000203664	0.0178122	6.9246e-05	0.0195906	0.000209643	0.0178122	4.52688e-05	0.0130769
cg03166835	50393997	19	IL4I1	Body	Island	0.00137476	0.223075	6.92529e-05	0.0195906	0.00129861	0.223075	0.000138574	0.0273108
cg23934731	89904873	15	NA		Island	0.00425047	0.55153	6.92731e-05	0.0195906	0.00385868	0.55153	0.000144205	0.0281354
cg07758738	12911528	18	NA		Island	0.00211389	0.456434	6.95785e-05	0.0196611	0.00202536	0.456434	0.000128124	0.0259983
cg05241025	24237256	22	MIF	Body	Island	0.000469365	0.0352101	6.97192e-05	0.0196615	0.000493591	0.0352101	2.60947e-05	0.00917449
cg03959661	207139348	2	ZDBF2	TSS200	Island	0.000380238	0.042872	6.97423e-05	0.0196615	0.000381021	0.042872	7.68982e-05	0.0186553
cg18667659	99438903	2	KIAA1211L	Body	Island	0.00269222	0.701082	6.97488e-05	0.0196615	0.00274008	0.701082	5.82736e-05	0.0155352
cg16655791	106429610	6	NA		Island	0.00115999	0.193196	6.99547e-05	0.0197037	0.00110151	0.193196	0.000136262	0.0270533
cg01738522	8690035	4	NA		Island	0.000918484	0.0811968	7.01538e-05	0.0197439	0.000761157	0.0811968	3.97463e-05	0.0120697
cg16509851	174430614	4	NA		Island	0.00120231	0.0575507	7.03695e-05	0.0197887	0.00107946	0.0575507	0.000140593	0.0275999
cg14127859	96716928	9	BARX1	Body	Island	0.0016314	0.165409	7.07756e-05	0.0198869	0.00153371	0.165409	0.000144343	0.0281466
cg23676151	108491372	6	NR2E1	Body	Island	0.00212201	0.213493	7.08824e-05	0.0199009	0.00177348	0.213493	5.15058e-05	0.0142435
cg02440744	103086804	7	SLC26A5	TSS200	Island	0.00184167	0.133176	7.14463e-05	0.0200431	0.00162318	0.133176	0.000126026	0.0257095
cg23328050	90234224	15	PEX11A	TSS1500	S_Shore	0.00049083	0.0355853	7.15049e-05	0.0200435	0.000506989	0.0355853	4.3338e-05	0.0127616
cg04207084	157477846	7	PTPRN2	Body	Island	0.00224259	0.0974724	7.16079e-05	0.0200563	0.00195139	0.0974724	0.000110536	0.0235496
cg25347264	5540220	12	NTF3	TSS1500	Island	0.000583301	0.0389674	7.18199e-05	0.0200996	0.000537943	0.0389674	0.000152249	0.0292279
cg13467254	60031944	8	TOX	TSS200	Island	0.000314666	0.0281318	7.20812e-05	0.0201566	0.000339677	0.0281318	1.08236e-05	0.00504177
cg17611674	8094431	10	FLJ45983	Body	Island	0.00221467	0.378564	7.25356e-05	0.0202674	0.00245061	0.378564	3.29313e-06	0.00216546
cg06156376	157823814	3	SHOX2	1stExon	Island	0.00140805	0.233243	7.26713e-05	0.0202892	0.0014775	0.233243	2.91827e-05	0.00989967
cg24645214	54789978	8	RGS20	Body	Island	0.00152995	0.0961346	7.27579e-05	0.0202943	0.00133052	0.0961346	0.000111903	0.0237262
cg24430580	111544235	4	PITX2	1stExon	Island	0.000852824	0.0820695	7.28059e-05	0.0202943	0.000812979	0.0820695	0.000138372	0.0272864
cg13786089	3869086	19	ZFR2	TSS200	Island	0.00214499	0.143988	7.31229e-05	0.0203665	0.00169489	0.143988	4.22487e-06	0.00258866
cg13445199	10459132	4	ZNF518B	TSS200	Island	0.00131366	0.0370988	7.35629e-05	0.0204619	0.00138684	0.0370988	2.46832e-05	0.00880207
cg05575054	115804968	10	ADRB1	1stExon	Island	0.00150185	0.0745577	7.35825e-05	0.0204619	0.00123397	0.0745577	3.25586e-05	0.0106348
cg07300558	35145353	18	CELF4	1stExon	Island	0.00084586	0.0914218	7.38171e-05	0.0205067	0.000713979	0.0914218	6.94437e-05	0.0174646
cg08601357	21504446	20	NA		S_Shore	0.00093461	0.0745288	7.38608e-05	0.0205067	0.000765309	0.0745288	2.89937e-05	0.00984852
cg08831002	20826153	7	SP8	5'UTR	S_Shore	0.00164528	0.187998	7.42274e-05	0.0205921	0.00153149	0.187998	0.00015559	0.0294984
cg26890189	47951302	19	SLC8A2	Body	Island	0.00206127	0.0887606	7.43268e-05	0.0205997	0.00164036	0.0887606	7.22595e-06	0.00381271
cg07636295	656446	20	SCRT2	5'UTR	Island	0.000914702	0.0437092	7.43776e-05	0.0205997	0.000761246	0.0437092	4.95646e-05	0.0138823
cg22350070	79738639	2	CTNNA2	TSS1500	N_Shore	0.0017634	0.101548	7.44729e-05	0.0205997	0.00139929	0.101548	6.01391e-06	0.00331967
cg24361162	156358116	1	NA		Island	0.00169217	0.132808	7.44902e-05	0.0205997	0.00155463	0.132808	0.000157975	0.0298063
cg16024950	100254149	7	ACTL6B	TSS200	Island	0.00246499	0.178786	7.45831e-05	0.0206091	0.00211171	0.178786	9.32739e-05	0.0212246
cg08441530	134025433	11	NCAPD3	Body		-0.00020653	0.988657	7.52433e-05	0.0207751	-0.000215647	0.988657	3.4713e-05	0.0110184
cg07440775	26507383	10	GAD2	Body	Island	0.0018931	0.238295	7.53111e-05	0.0207774	0.00161525	0.238295	8.8226e-05	0.0203587
cg01080998	87981177	5	LINC00461	TSS1500	Island	0.00105422	0.160131	7.54094e-05	0.0207882	0.000892338	0.160131	7.59379e-05	0.0185366
cg21054441	68871409	15	CORO2B	TSS200	Island	0.000748934	0.0581308	7.56086e-05	0.0208267	0.000677581	0.0581308	0.000156282	0.0295842
cg12641275	11411487	8	BLK	Body		0.000351731	0.0283798	7.58051e-05	0.0208643	0.000346044	0.0283798	0.000107848	0.0231464
cg03397716	6484980	1	ESPN	1stExon	Island	0.000680774	0.0397273	7.59737e-05	0.0208943	0.000611202	0.0397273	0.000152493	0.029239
cg12453631	157812226	3	NA		Island	0.00152725	0.287969	7.62428e-05	0.0209519	0.00127483	0.287969	5.5885e-05	0.0150733
cg15452970	91190620	1	NA		Island	0.002145	0.34226	7.66111e-05	0.0210365	0.00170717	0.34226	7.87107e-06	0.00401385
cg04649897	23571979	8	NA		Island	0.000447669	0.0392777	7.66762e-05	0.0210379	0.000417862	0.0392777	0.000159467	0.0299923
cg03074925	10425625	6	NA		N_Shore	0.00153518	0.231412	7.67769e-05	0.021049	0.00125252	0.231412	2.71564e-05	0.00939745
cg08310866	21281163	17	KCNJ12	5'UTR	Island	0.0013052	0.101843	7.70785e-05	0.0211152	0.00137995	0.101843	2.48828e-05	0.00884619
cg07152196	87016436	2	CD8A	Body	Island	0.000726417	0.0566325	7.72701e-05	0.0211511	0.000616424	0.0566325	8.25931e-05	0.0195356
cg07362969	63998463	8	TTPA	1stExon	Island	0.00103982	0.0391678	7.75276e-05	0.021205	0.000891351	0.0391678	9.90975e-05	0.021955
cg22623223	157484045	7	PTPRN2	Body	Island	0.000565595	0.0361692	7.7723e-05	0.0212289	0.000536785	0.0361692	0.000151138	0.0290665
cg12377139	22634218	10	SPAG6	TSS200	Island	0.00179017	0.168985	7.77677e-05	0.0212289	0.00152821	0.168985	9.2929e-05	0.0211785
cg01452847	46711341	17	MIR196A1	TSS1500	Island	0.00112927	0.0762929	7.7797e-05	0.0212289	0.00108892	0.0762929	0.000135674	0.0269825
cg16516556	55008180	1	NA		Island	0.000239953	0.0261968	7.79862e-05	0.0212517	0.000235417	0.0261968	0.000114384	0.0240327
cg14335275	150186921	2	LYPD6	TSS200	Island	0.00272974	0.108918	7.80021e-05	0.0212517	0.00232062	0.108918	8.6635e-05	0.0201294
cg18240400	46168597	10	ZFAND4	TSS1500	Island	0.00206142	0.415173	7.80972e-05	0.021261	0.00169562	0.415173	3.76398e-05	0.0116418
cg24042242	43044660	17	C1QL1	Body	Island	0.00158001	0.0815158	7.85391e-05	0.0213483	0.00309453	0.310343	8.6657e-05	0.0201294
cg06737494	172167644	3	GHSR	TSS1500	Island	0.00309141	0.309059	7.85397e-05	0.0213483	0.00128316	0.0815158	2.35602e-05	0.00850564
cg10121601	47698126	1	NA		Island	0.000983408	0.0989378	7.86527e-05	0.0213604	0.000871764	0.0989378	0.000147025	0.0284948
cg09247060	50787803	6	TFAP2B	Body	Island	0.00107522	0.165816	7.87063e-05	0.0213604	0.000902396	0.165816	6.7092e-05	0.0170649
cg11924832	38605287	6	BTBD9	5'UTR	N_Shore	0.00109273	0.93694	7.8824e-05	0.0213738	0.000973178	0.93694	0.000151978	0.0292099
cg08132931	70994962	2	ADD2	5'UTR	Island	0.000268978	0.0220439	7.88779e-05	0.0213738	0.000267419	0.0220439	9.76292e-05	0.0217953
cg07062476	79286648	5	MTX3	5'UTR	Island	0.000574248	0.0445986	7.89449e-05	0.0213754	0.000593048	0.0445986	4.83794e-05	0.0136818
cg19991079	74162458	5	FAM169A	5'UTR	Island	0.000402518	0.0383264	7.90982e-05	0.0213938	0.000399165	0.0383264	0.000101529	0.0223099
cg09949775	18902107	19	COMP	1stExon	Island	0.00198725	0.17295	7.91353e-05	0.0213938	0.00180557	0.17295	0.000165692	0.0307661
cg03749016	23564591	8	NKX2-6	TSS1500	Island	0.00049196	0.0390237	7.94982e-05	0.0214753	0.000409312	0.0390237	5.4703e-05	0.0148691
cg15074033	52652462	12	NA		Island	0.00161783	0.0717182	7.98805e-05	0.0215619	0.00139957	0.0717182	0.000117447	0.0244622
cg02745847	47075880	17	IGF2BP1	Body	Island	0.00225609	0.208512	8.00864e-05	0.0216009	0.00196328	0.208512	0.000126608	0.0257805
cg16692196	85040371	1	CTBS	TSS1500	S_Shore	0.000189313	0.0188768	8.07621e-05	0.0217663	0.000196964	0.0188768	4.12012e-05	0.0123932
cg18132212	40751843	4	NSUN7	TSS200	Island	0.00127343	0.120095	8.09856e-05	0.0217964	0.0012836	0.120095	8.09789e-05	0.0192319
cg04106092	47760096	16	NA			0.00243398	0.61966	8.09982e-05	0.0217964	0.00219463	0.61966	0.000166072	0.0308203
cg05467160	176945526	2	EVX2	Body	Island	0.00172336	0.149808	8.10667e-05	0.021798	0.0013978	0.149808	2.38027e-05	0.00857548
cg08949164	1383433	16	BAIAP3	TSS1500	Island	0.00140518	0.0833989	8.13266e-05	0.0218511	0.00113364	0.0833989	1.88883e-05	0.00727712
cg26195583	41869348	4	NA		Island	0.000420097	0.0340478	8.14132e-05	0.0218576	0.000383771	0.0340478	0.000171941	0.0312181
cg20467957	31845529	11	NA		N_Shore	0.00151075	0.24659	8.17284e-05	0.0219231	0.00130706	0.24659	0.000120956	0.0249933
cg02519751	147126753	3	ZIC1	TSS1500	N_Shore	0.00515995	0.403423	8.18342e-05	0.0219231	0.00516723	0.403423	9.10828e-05	0.0208256
cg04050000	31361687	2	GALNT14	TSS200	Island	0.00107866	0.0793905	8.18467e-05	0.0219231	0.00102888	0.0793905	0.000154189	0.0293784
cg26677995	1422907	11	BRSK2	Body		0.00135267	0.0859167	8.19495e-05	0.0219231	0.00116636	0.0859167	0.000116058	0.0243261
cg06844012	159944430	3	LOC401097	3'UTR	Island	0.000526334	0.0385322	8.19704e-05	0.0219231	0.000462452	0.0385322	0.000143377	0.0280206
cg20941110	83953819	15	BNC1	TSS1500	Island	0.00104353	0.0831293	8.21239e-05	0.0219473	0.000863172	0.0831293	4.89506e-05	0.013821
cg03348397	54789648	8	RGS20	Body	Island	0.00158713	0.137758	8.2478e-05	0.0220251	0.00125881	0.137758	7.67007e-06	0.00395296
cg10538797	105480546	2	NA		Island	0.000423966	0.0405759	8.27774e-05	0.0220669	0.000352961	0.0405759	5.93039e-05	0.0156811
cg17508941	19183280	7	NA		N_Shore	0.00259018	0.467897	8.27954e-05	0.0220669	0.00218333	0.467897	7.96217e-05	0.0190383
cg09478857	117664976	1	TRIM45	TSS1500	Island	0.000887545	0.0941154	8.28234e-05	0.0220669	0.000826622	0.0941154	0.000172939	0.0312978
cg07519816	53447596	18	NA		Island	0.000967037	0.0366606	8.30247e-05	0.0220724	0.000855051	0.0366606	0.000153253	0.0293121
cg09477019	56681945	16	NA			0.00215301	0.590395	8.30297e-05	0.0220724	0.00218834	0.590395	7.14623e-05	0.0177805
cg16686175	57642721	17	DHX40	TSS200	Island	0.00322572	0.610588	8.30563e-05	0.0220724	0.00316989	0.610588	0.000119545	0.0247749
cg11718030	27744363	11	BDNF	TSS1500	Island	0.00125764	0.102749	8.30967e-05	0.0220724	0.000998951	0.102749	8.58643e-06	0.00430955
cg00479208	50656893	22	TUBGCP6	Body	Island	-0.000469152	0.96953	8.32258e-05	0.0220744	-0.000467092	0.96953	0.000100965	0.0222278
cg23496260	17218089	5	BASP1	5'UTR	Island	0.000682723	0.0478238	8.32303e-05	0.0220744	0.000596046	0.0478238	0.000137264	0.027173
cg16589463	99293069	6	NA		Island	0.000381763	0.0401762	8.33892e-05	0.0220998	0.00033754	0.0401762	0.000153815	0.0293554
cg01287975	97361241	7	TAC1	TSS200	Island	0.00238053	0.163149	8.38968e-05	0.0222175	0.00192892	0.163149	2.44834e-05	0.00874865
cg23642747	105036645	10	INA	TSS1500	Island	0.00112229	0.1361	8.47031e-05	0.022414	0.00116899	0.1361	4.2335e-05	0.0126149
cg17977409	17579227	9	SH3GL2	1stExon	Island	0.00140472	0.0701616	8.50798e-05	0.0224967	0.00114279	0.0701616	2.96147e-05	0.0099923
cg26090107	60718882	11	SLC15A3	1stExon	Island	0.00129693	0.103209	8.53014e-05	0.0225383	0.00131331	0.103209	7.87032e-05	0.0189336
cg25771195	58163814	16	CFAP20	TSS1500	S_Shore	0.00213569	0.56798	8.56414e-05	0.022611	0.0021193	0.56798	0.000108809	0.0232797
cg13632058	117267392	9	DFNB31	5'UTR	Island	0.00064904	0.0518122	8.58103e-05	0.0226334	0.000633594	0.0518122	0.000132736	0.0266139
cg14582193	79152553	15	NA			0.000503368	0.0404505	8.59006e-05	0.0226334	0.000509506	0.0404505	7.98374e-05	0.0190383
cg08983097	117586538	6	VGLL2	TSS200	Island	0.00105763	0.118679	8.5958e-05	0.0226334	0.000896637	0.118679	9.40656e-05	0.0213072
cg25617340	37128011	14	PAX9	5'UTR	Island	0.000835692	0.057002	8.59849e-05	0.0226334	0.000738021	0.057002	0.000157927	0.0298063
cg00745389	32467435	7	NA		Island	0.00107505	0.14519	8.61485e-05	0.0226594	0.00100557	0.14519	0.000177625	0.0317354
cg24155668	36098398	6	MAPK13	1stExon	Island	0.000819712	0.023257	8.6396e-05	0.0227047	0.000851939	0.023257	4.57399e-05	0.0131479
cg27456468	200334001	2	FLJ32063	Body	Island	0.00138954	0.146083	8.64504e-05	0.0227047	0.00124267	0.146083	0.000171839	0.0312181
cg00185336	73153699	7	ABHD11	TSS1500	Island	0.000617353	0.0581853	8.6847e-05	0.0227917	0.000646199	0.0581853	3.82191e-05	0.0117487
cg20007569	62584726	12	FAM19A2	5'UTR	N_Shore	0.000393183	0.0389635	8.70625e-05	0.0228311	0.00035777	0.0389635	0.000183039	0.0323884
cg12610471	22634199	10	SPAG6	TSS200	Island	0.00159879	0.163898	8.75822e-05	0.0229502	0.00130418	0.163898	3.46655e-05	0.0110184
cg04043742	46703315	6	PLA2G7	TSS200	Island	0.00115199	0.129912	8.78049e-05	0.0229878	0.000983236	0.129912	0.00010887	0.0232797
cg12172057	47621687	7	NA		Island	0.00223448	0.160558	8.79063e-05	0.0229878	0.00197431	0.160558	0.00016252	0.0303706
cg17326555	119535693	1	NA		Island	0.00229844	0.391341	8.79229e-05	0.0229878	0.00206261	0.391341	0.000177743	0.0317402
cg23448486	147129213	3	ZIC1	Body	N_Shore	0.00102636	0.133757	8.81116e-05	0.0230033	0.000900326	0.133757	0.000153609	0.0293495
cg02385167	7565757	19	C19orf45	Body	Island	0.00131386	0.153813	8.81889e-05	0.0230033	0.00109207	0.153813	6.29447e-05	0.0164079
cg07234028	2043594	4	C4orf48	TSS200	Island	0.000660318	0.0569862	8.82772e-05	0.0230033	0.000726326	0.0569862	6.09284e-06	0.00335131
cg00364357	64443650	15	SNX22	TSS1500	Island	0.000556419	0.0625208	8.83038e-05	0.0230033	0.000558158	0.0625208	9.55521e-05	0.0215101
cg02524946	35294640	7	TBX20	TSS1500	Island	0.00150581	0.144267	8.83109e-05	0.0230033	0.00117309	0.144267	2.38629e-06	0.00173914
cg07717763	21059365	1	SH2D5	TSS1500	Island	0.000615058	0.0706271	8.84051e-05	0.0230107	0.000634993	0.0706271	5.49885e-05	0.0148889
cg25302419	11904015	5	CTNND2	5'UTR	Island	0.000730118	0.0597858	8.87089e-05	0.0230561	0.000623652	0.0597858	0.000111731	0.0237262
cg21722655	7197878	17	YBX2	TSS200	Island	0.00014545	0.0226972	8.87112e-05	0.0230561	0.000142273	0.0226972	0.000133347	0.026641
cg13096541	138482936	6	ARFGEF3	TSS200	Island	0.000406152	0.0494149	8.8951e-05	0.0231012	0.000407449	0.0494149	9.61029e-05	0.0216201
cg15715853	150916446	3	GPR171	Body		0.00252738	0.830685	8.90402e-05	0.0231072	0.00235775	0.830685	0.000184847	0.0325274
cg21265540	125534110	12	NA		Island	0.000494412	0.0374347	8.94407e-05	0.023194	0.000516234	0.0374347	4.21839e-05	0.0125913
cg12189551	60952945	14	C14orf39	TSS200	Island	0.000828714	0.0556558	8.97443e-05	0.0232555	0.000746778	0.0556558	0.000184453	0.0324771
cg02091526	175190867	2	NA		Island	0.000781518	0.0662356	8.98517e-05	0.0232661	0.000696279	0.0662356	0.000175587	0.0315485
cg17861230	18343901	19	PDE4C	Body	Island	0.00274442	0.2245	9.0345e-05	0.0233765	0.00241117	0.2245	0.000160267	0.0300942
cg07876898	49297846	12	CCDC65	TSS200		0.000428279	0.0424161	9.07901e-05	0.0234743	0.00045171	0.0424161	3.23844e-05	0.0106076
cg06032349	40032331	21	ERG	5'UTR	Island	0.00158715	0.220496	9.09386e-05	0.0234831	0.00132557	0.220496	7.44559e-05	0.0182912
cg04983516	79151719	11	TENM4	TSS200	Island	0.000610334	0.0282029	9.09584e-05	0.0234831	0.000547745	0.0282029	0.000184221	0.0324771
cg11356706	656240	20	SCRT2	1stExon	Island	0.000856846	0.0687715	9.10514e-05	0.0234871	0.000798135	0.0687715	0.000189608	0.0330657
cg15239123	70346413	14	SMOC1	1stExon	Island	0.000540562	0.0619694	9.1108e-05	0.0234871	0.000498838	0.0619694	0.000192657	0.0333709
cg08612100	96742421	13	HS6ST3	TSS1500	Island	0.00127566	0.0649428	9.13349e-05	0.0235282	0.00112207	0.0662997	0.001936	0.122759
cg21303386	241520311	1	RGS7	5'UTR	Island	0.00113665	0.0822819	9.17631e-05	0.0236211	0.000996923	0.0822819	0.00016074	0.0301346
cg07563793	75596336	1	LHX8	5'UTR	N_Shore	0.0011969	0.104595	9.19389e-05	0.0236335	0.00103416	0.104595	0.000137541	0.0271786
cg14173147	27528300	9	MOB3B	5'UTR	N_Shore	0.00066376	0.0512622	9.19464e-05	0.0236335	0.000662165	0.0512622	0.000108187	0.0232046
cg23746497	105388668	6	NA		Island	0.0038142	0.340012	9.23314e-05	0.0237151	0.00299314	0.340012	5.03229e-06	0.00293894
cg25397922	113431869	4	NA		Island	0.00115231	0.103	9.24373e-05	0.0237249	0.00106779	0.103	0.000194487	0.0335081
cg02826439	120004267	3	NA		Island	0.000757724	0.0595878	9.29911e-05	0.0238247	0.000677226	0.0595878	0.000185212	0.0325587
cg24151926	6240455	1	CHD5	TSS1500	Island	0.000564743	0.0390719	9.31003e-05	0.0238247	0.000501279	0.0390719	0.00017854	0.0318501
cg15355387	85007817	3	CADM2	TSS1500	N_Shore	0.000623314	0.0539628	9.31243e-05	0.0238247	0.000546572	0.0539628	0.000163131	0.0303878
cg01241390	80596277	5	RNU5E-1	Body	N_Shore	0.00317629	0.637841	9.31797e-05	0.0238247	0.00288534	0.637841	0.000195778	0.0336551
cg11278204	3341875	7	SDK1	Body	S_Shore	0.00100483	0.0817324	9.31874e-05	0.0238247	0.000865697	0.0817324	0.00013479	0.0268525
cg18361098	37136391	14	PAX9	Body	S_Shore	0.00158756	0.0875985	9.32351e-05	0.0238247	0.0014323	0.0875985	0.000192694	0.0333709
cg05166490	41754172	8	ANK1	1stExon	Island	0.0005853	0.0272474	9.33465e-05	0.0238358	0.000503665	0.0272474	0.000132942	0.0266214
cg07841815	100318223	7	EPO	TSS200	Island	0.00049007	0.0335621	9.34493e-05	0.0238446	0.000419253	0.0335621	0.000122447	0.0252269
cg22195220	45937072	18	NA		Island	0.000997486	0.150506	9.35877e-05	0.0238625	0.000872034	0.150506	0.000159654	0.0300113
cg01692233	76738717	18	NA		Island	0.00112121	0.0867908	9.36784e-05	0.0238683	0.000902197	0.0867908	2.27317e-05	0.0082667
cg15461335	88324432	13	SLITRK5	TSS1500	Island	0.000895812	0.0663395	9.40125e-05	0.023936	0.000722605	0.0663395	2.5537e-05	0.00903991
cg11697427	102590168	10	NA		Island	0.00120607	0.103174	9.42107e-05	0.023969	0.00104707	0.103174	0.00014986	0.028894
cg10507482	175198039	2	NA		N_Shore	0.00159218	0.249169	9.47929e-05	0.0240996	0.00145346	0.249169	0.000200522	0.0341685
cg16896647	93563776	9	SYK	TSS1500	Island	0.000473331	0.0485067	9.50535e-05	0.0241483	0.000425483	0.0485067	0.000194137	0.0335047
cg26704870	73144279	2	EMX1	TSS1500	Island	0.00133238	0.173459	9.53331e-05	0.0242012	0.00115742	0.173459	0.000152993	0.0292783
cg02085953	97202260	2	ARID5A	TSS1500	N_Shore	-0.00143145	0.30846	9.54002e-05	0.0242012	-0.00129159	0.30846	0.000197405	0.0338683
cg19986872	131347773	5	ACSL6	TSS1500	Island	0.000915025	0.0653246	9.55144e-05	0.0242126	0.000857304	0.0653246	0.000195224	0.0336095
cg19581424	42396302	2	EML4	TSS200	Island	0.000879227	0.081351	9.57765e-05	0.0242615	0.000940858	0.081351	2.16679e-05	0.00802965
cg01956717	55866635	19	FAM71E2	3'UTR	S_Shore	0.000504228	0.0385389	9.58556e-05	0.024264	0.000450067	0.0385389	0.000190048	0.0330817
cg06517489	22359333	11	SLC17A6	TSS1500	N_Shelf	0.000371281	0.0333508	9.61124e-05	0.0243114	0.000362413	0.0333508	0.000148011	0.0286196
cg05849324	18122474	6	NHLRC1	1stExon	Island	0.00178968	0.384485	9.62844e-05	0.0243373	0.00164082	0.384485	0.000204132	0.034548
cg09515953	38747355	19	PPP1R14A	TSS200	Island	0.0013487	0.0842477	9.63566e-05	0.0243379	0.00113452	0.0842477	9.4966e-05	0.021461
cg05870479	7567426	18	PTPRM	1stExon	Island	0.000702095	0.034432	9.65548e-05	0.0243704	0.000655632	0.034432	0.000199366	0.0340769
cg04368796	40171968	17	NKIRAS2	TSS200	Island	0.000592149	0.0457744	9.72264e-05	0.0245222	0.00062349	0.0457744	3.68231e-05	0.011481
cg02347527	113916891	12	NA		N_Shore	0.00115918	0.0843231	9.75309e-05	0.0245813	0.000948081	0.0843231	4.63689e-05	0.0132824
cg00901320	129338534	12	GLT1D1	Body	Island	0.00153752	0.110958	9.77032e-05	0.024607	0.00122303	0.110958	1.40773e-05	0.00600564
cg14983586	27206503	6	NA			0.00021718	0.0245706	9.78375e-05	0.0246231	0.000195365	0.0245706	0.000200134	0.0341405
cg26157385	248020641	1	TRIM58	1stExon	Island	0.00161588	0.149074	9.79537e-05	0.0246346	0.00149688	0.149074	0.000205986	0.0347442
cg01029623	122016779	12	KDM2B	Body	Island	0.00138701	0.112525	9.81681e-05	0.0246708	0.00122515	0.112525	0.000183416	0.0324387
cg05724871	6414446	18	L3MBTL4	5'UTR	Island	0.0013624	0.0481786	9.85434e-05	0.0247474	0.00117528	0.0481786	0.000146905	0.0284948
cg08855568	61547104	3	PTPRG	TSS200	Island	0.000508265	0.0233258	9.89311e-05	0.0248269	0.000485101	0.0233258	0.000183991	0.0324747
cg02732202	100051635	6	NA		Island	0.000589851	0.0753956	9.90205e-05	0.0248272	0.000587252	0.0753956	0.000119737	0.0248
cg27052113	47951305	19	SLC8A2	Body	Island	0.00135586	0.0614907	9.90745e-05	0.0248272	0.00113242	0.0614907	8.48513e-05	0.019855
cg06554120	11385067	5	CTNND2	Body	Island	0.000448957	0.0239212	9.93044e-05	0.024867	0.000391578	0.0239212	0.000167229	0.0308953
cg00122944	6227266	10	PFKFB3	Body		0.00182205	0.807431	9.94481e-05	0.0248852	0.00166301	0.807431	0.00021043	0.0353157
cg15283629	31367518	6	NA		Island	0.000285854	0.0281366	9.97815e-05	0.0249508	0.000280209	0.0281366	0.000146508	0.0284657
cg06775930	126069089	6	NA		Island	0.000419291	0.0279503	9.98602e-05	0.0249526	0.000403896	0.0279503	0.000173486	0.0313644
cg13426307	116860437	9	KIF12	5'UTR	N_Shore	0.00100688	0.0733851	0.00010021	0.0250223	0.00080133	0.0733851	1.53877e-05	0.00631812
cg14058010	8029284	17	NA		N_Shore	0.00118927	0.137155	0.000100763	0.0251424	0.00126796	0.137155	2.61353e-05	0.00917951
cg15931943	61236909	3	FHIT	5'UTR	Island	0.000695551	0.0545245	0.000101076	0.0252016	0.000617784	0.0545245	0.000196091	0.0336758
cg26417361	99292838	6	NA		Island	0.00101365	0.115187	0.000101145	0.0252016	0.000980673	0.115187	0.0001694	0.0311078
cg26620450	133195061	12	P2RX2	TSS1500	Island	0.000229	0.0159439	0.000101276	0.0252164	0.000194863	0.0159439	0.000124902	0.0255371
cg09793172	21044101	1	KIF17	1stExon	Island	0.00232207	0.178123	0.000101375	0.0252171	0.0018751	0.178123	3.12272e-05	0.010296
cg02169487	62493065	10	NA		Island	0.000719043	0.0624059	0.000101423	0.0252171	0.000735807	0.0624059	7.68662e-05	0.0186553
cg08669447	44203749	19	NA		Island	0.00110417	0.0718357	0.000101559	0.0252328	0.000893367	0.0718357	3.3868e-05	0.0108653
cg14842777	112723226	13	SOX1	1stExon	Island	0.00185676	0.0636543	0.000101956	0.0253137	0.00153672	0.0636543	7.09966e-05	0.0177277
cg11706983	27233454	7	NA		S_Shore	0.0024941	0.221793	0.000102029	0.0253138	0.00226471	0.221793	0.00021462	0.0357555
cg05907933	77268888	5	NA		S_Shore	0.000346592	0.0230215	0.000102463	0.0253944	0.00110392	0.0920692	0.154308	0.691552
cg23520245	33460568	20	GGT7	1stExon	Island	0.000274686	0.0170002	0.000102564	0.0253944	0.000343617	0.0230215	0.000131021	0.0264329
cg26027669	92952467	1	GFI1	TSS1500	Island	0.00187974	0.087661	0.000102572	0.0253944	0.000287671	0.0170002	4.53313e-05	0.0130769
cg23040064	87635784	16	JPH3	TSS1500	N_Shore	0.000428191	0.0349805	0.000102936	0.0254664	0.000366204	0.0349805	0.000138134	0.027255
cg03523785	29234981	14	FOXG1	TSS1500	Island	0.00150711	0.246634	0.000103192	0.0254963	0.00144077	0.246634	0.000189553	0.0330657
cg00390775	79521282	9	PRUNE2	TSS1500	Island	0.00163077	0.120062	0.000103202	0.0254963	0.00127576	0.120062	5.59534e-06	0.00319836
cg25288068	28793681	6	NA			0.00389132	0.344272	0.000103709	0.0255865	0.00364655	0.345157	0.000214742	0.0357555
cg20208384	124931162	3	SLC12A8	5'UTR	Island	0.000564015	0.0518693	0.000103736	0.0255865	0.00049137	0.0518693	0.00017414	0.0314175
cg07358855	99960843	8	OSR2	5'UTR	Island	0.00110495	0.111107	0.000103787	0.0255865	0.000921483	0.111107	8.79913e-05	0.0203448
cg18961681	32467657	7	NA		Island	0.00217969	0.102798	0.000103965	0.0256123	0.00171066	0.102798	7.21153e-06	0.00381085
cg09862801	45396991	2	NA		Island	0.000842324	0.0721294	0.000104083	0.0256234	0.000727361	0.0721294	0.00015903	0.0299262
cg04915182	179635731	5	RASGEF1C	5'UTR	N_Shore	0.000523283	0.0536318	0.000104259	0.0256488	0.000448892	0.0536318	0.000146549	0.0284657
cg15160263	76923943	5	NA		Island	0.000684725	0.054953	0.00010453	0.0256933	0.0006035	0.054953	0.000193677	0.0334436
cg02728483	172965081	2	DLX2	3'UTR	Island	0.00108058	0.198692	0.000104587	0.0256933	0.00099923	0.198692	0.000220261	0.0363801
cg24435879	155166205	7	NA		Island	0.00113161	0.0980469	0.000104908	0.025754	0.00119491	0.0980469	3.70132e-05	0.0114993
cg17243289	45458021	18	SMAD2	TSS1500	Island	0.00281835	0.390596	0.000105134	0.0257914	0.00315756	0.390596	2.8623e-06	0.00198279
cg21574675	45656942	19	NKPD1	Body	Island	0.000389499	0.0625951	0.000105223	0.0257951	0.000354491	0.0625951	0.000221972	0.0365352
cg06737666	78080026	16	NA		Island	0.000623392	0.0442204	0.000105344	0.0258068	0.000506173	0.0442204	4.15831e-05	0.0124866
cg03943773	111552308	4	PITX2	Body	N_Shore	0.000768097	0.0454188	0.000105707	0.0258775	0.000702734	0.0454188	0.000223989	0.0367185
cg09989644	156358119	1	NA		Island	0.0012726	0.138931	0.000105867	0.0258986	0.00109919	0.138931	0.000162879	0.0303878
cg22043168	27741077	11	BDNF	Body	Island	0.0018716	0.107532	0.000106173	0.025948	0.00147156	0.107532	8.67499e-06	0.00433534
cg11273947	68120757	15	SKOR1	Body	Island	0.00101648	0.091169	0.000106217	0.025948	0.000873088	0.091169	0.000152659	0.029239
cg01688536	35296968	7	NA		Island	0.000494452	0.042578	0.000106352	0.0259629	0.00041477	0.042578	0.000103434	0.0225124
cg05676400	174443865	4	NA		Island	0.00131441	0.135869	0.000106836	0.0260629	0.00114137	0.135869	0.000174577	0.031464
cg26133769	30723855	4	PCDH7	1stExon	Island	0.00313672	0.164505	0.000107053	0.0260837	0.00250803	0.164505	2.2726e-05	0.0082667
cg00044245	94128889	6	EPHA7	Body	Island	0.00117591	0.108295	0.000107088	0.0260837	0.000936529	0.108295	1.87369e-05	0.00723521
cg20607331	58038621	19	ZNF549	TSS200	Island	0.000186037	0.0249905	0.000107146	0.0260837	0.000184823	0.0249905	0.000132755	0.0266139
cg17269633	42733600	17	C17orf104	TSS200	Island	0.00200699	0.158509	0.000107483	0.0261341	0.00185649	0.158509	0.000226157	0.0369182
cg03602730	120626911	3	STXBP5L	TSS200	Island	0.000840753	0.0727663	0.000107502	0.0261341	0.000783649	0.0727663	0.000222471	0.0365725
cg05739757	101618506	2	RPL31	TSS200	Island	0.00033638	0.0317983	0.000108011	0.0262397	0.000270561	0.0317983	3.01544e-05	0.0100946
cg07135732	91184290	1	BARHL2	TSS1500	Island	0.000857573	0.0797854	0.000108207	0.026269	0.000687839	0.0797854	2.68574e-05	0.00932084
cg14305560	139487958	9	NA			-0.000626326	0.963075	0.000108669	0.026351	-0.000605752	0.963075	0.00018189	0.0322666
cg15689967	26235287	6	HIST1H1D	TSS200		0.000253546	0.0184947	0.000108696	0.026351	0.000255169	0.0184947	0.000111313	0.0236863
cg02532538	33787739	17	NA		Island	0.00136683	0.0897066	0.000108946	0.0263935	0.00136973	0.0897066	0.000119538	0.0247749
cg01968178	86565038	2	REEP1	Body	Island	0.00060688	0.07191	0.000109159	0.0264269	0.000559084	0.07191	0.000230716	0.0374179
cg18904346	126773656	9	LHX2	TSS1500	Island	0.000858061	0.0861132	0.000109385	0.0264547	0.000794079	0.0861132	0.00022988	0.0373194
cg23811789	5197462	18	LOC642597	TSS1500	S_Shore	0.00185308	0.118075	0.000109426	0.0264547	0.0016266	0.118075	0.000197865	0.0339306
cg02642021	167233055	2	SCN9A	TSS1500	S_Shore	0.000553124	0.0441335	0.000109776	0.0265146	0.000480145	0.0441335	0.000179621	0.0319826
cg09593028	97890481	10	ZNF518A	5'UTR	S_Shore	0.000506211	0.0494067	0.000109825	0.0265146	0.000490136	0.0494067	0.000181879	0.0322666
cg26315277	31839549	11	PAX6	TSS200	Island	0.00109592	0.101101	0.000110229	0.0265937	0.000965957	0.101101	0.000205608	0.034697
cg25224094	60296273	15	FOXB1	TSS200	Island	0.00045976	0.0474907	0.000110598	0.0266644	0.000419811	0.0474907	0.000234115	0.037794
cg04115680	75889229	7	SRRM3	Body	Island	0.00182653	0.0717319	0.000110819	0.0266994	0.00146434	0.0717319	2.77245e-05	0.00955542
cg08757420	75234148	8	JPH1	TSS1500	S_Shore	0.000570108	0.0712463	0.000111155	0.0267508	0.000532546	0.0712463	0.000228269	0.0371762
cg21275135	99273679	6	NA		S_Shore	0.000739977	0.0709322	0.000111186	0.0267508	0.000692907	0.0709322	0.000226514	0.0369592
cg05396044	173836727	1	GAS5	Body	N_Shore	0.000428704	0.0373139	0.000111336	0.0267685	0.000459023	0.0373139	2.55662e-05	0.00903991
cg01334549	50137002	20	NFATC2	Body	N_Shelf	-0.00114515	0.86446	0.000111662	0.0268284	-0.00104759	0.86446	0.000236647	0.0380447
cg20732478	176993643	2	HOXD8	TSS1500	Island	0.00115285	0.112838	0.000112325	0.0269539	0.00101648	0.112838	0.000210456	0.0353157
cg05721515	8095288	10	FLJ45983	Body	Island	0.000628818	0.0523371	0.000112338	0.0269539	0.000620329	0.0523371	0.000152704	0.029239
cg23978357	69490378	11	ORAOV1	TSS1500	S_Shore	0.00164332	0.120165	0.000112473	0.0269571	0.00150155	0.120165	0.000238306	0.0382587
cg04455430	50886920	1	DMRTA2	Body	Island	0.00128405	0.159306	0.00011258	0.0269571	0.00110684	0.159306	0.000171533	0.0312181
cg19671120	98962974	2	CNGA3	1stExon	Island	0.00169962	0.288214	0.000112583	0.0269571	0.0013201	0.288214	4.19815e-06	0.00258866
cg24465469	214724440	1	PTPN14	5'UTR	Island	0.00127555	0.0398641	0.000112767	0.0269828	0.00113415	0.0398641	0.000222132	0.0365352
cg01097384	1358675	11	NA		Island	0.00308004	0.259339	0.000113054	0.0270331	0.00243957	0.259339	1.59711e-05	0.00648908
cg19654195	24450361	20	SYNDIG1	5'UTR	Island	0.00134422	0.05959	0.000113532	0.0271165	0.00112243	0.05959	0.000103551	0.0225138
cg17569743	147109490	3	ZIC4	Body	Island	0.00087616	0.0924493	0.000113558	0.0271165	0.000821721	0.0924493	0.000229856	0.0373194
cg07974473	29235092	14	FOXG1	TSS1500	Island	0.000890515	0.141341	0.000113673	0.0271253	0.000859673	0.141341	0.000192929	0.0333952
cg25385733	217237043	2	2020-03-04	TSS1500	Island	0.00106026	0.113764	0.000113777	0.0271317	0.000895524	0.113764	0.00012958	0.0261874
cg13260012	43603788	11	NA		S_Shore	0.000825993	0.0807522	0.000114018	0.0271587	0.000682695	0.0807522	8.20998e-05	0.0194452
cg10805352	56411583	2	CCDC85A	1stExon	Island	0.000388977	0.0178743	0.000114046	0.0271587	0.00034506	0.0178743	0.000221948	0.0365352
cg19737037	42322739	22	TNFRSF13C	1stExon	Island	0.000386815	0.0221364	0.000114468	0.0272406	0.000408418	0.0221364	4.10206e-05	0.0123508
cg17227926	115860799	10	NA		Island	0.000195569	0.0160023	0.000114926	0.0273294	0.000173795	0.0160023	0.000225291	0.036875
cg22882178	104001226	10	PITX3	1stExon	Island	0.000305265	0.0273718	0.000114997	0.0273294	0.000255885	0.0273718	0.000114037	0.0239742
cg19246862	706635	11	EPS8L2	5'UTR	S_Shore	0.00134647	0.120877	0.000115321	0.0273879	0.00122561	0.120877	0.000243775	0.0388301
cg00629427	95357638	13	NA		Island	0.00147368	0.20422	0.000115916	0.0275105	0.00128897	0.20422	0.000205353	0.034697
cg02052142	60794866	14	NA		Island	0.000648407	0.0570794	0.000116218	0.0275634	0.000631632	0.0570794	0.000181356	0.0322046
cg26942275	94023825	7	COL1A2	TSS200		0.00126579	0.0732447	0.000116411	0.0275905	0.00117271	0.0732447	0.000243863	0.0388301
cg08889797	147106489	3	ZIC4	3'UTR	N_Shelf	0.00111455	0.112708	0.000116537	0.0276017	0.00102316	0.112708	0.000246816	0.0391445
cg10721149	25652405	6	SCGN	TSS200	Island	0.00201152	0.208787	0.000117421	0.0277921	0.00156233	0.208787	4.82178e-06	0.00284633
cg12831729	184529767	3	VPS8	TSS200	N_Shore	0.000282861	0.0249078	0.000117823	0.0278505	0.000293417	0.0249078	6.69947e-05	0.0170591
cg11970289	122688969	12	B3GNT4	5'UTR	Island	0.000852988	0.101061	0.000117826	0.0278505	0.000865841	0.101061	0.000104544	0.0226733
cg13647155	176046497	5	NA		Island	0.00102239	0.0735528	0.000118205	0.027921	0.000876363	0.0735528	0.000170089	0.0311526
cg26112929	5821500	7	RNF216	TSS1500	S_Shore	0.00109036	0.144693	0.000118383	0.0279443	0.00116051	0.144693	3.35596e-05	0.0108503
cg14912644	157176601	2	NA		Island	0.00163823	0.136145	0.000118523	0.0279585	0.00129844	0.136145	1.86062e-05	0.00721631
cg26155939	44337853	18	ST8SIA5	TSS1500	Island	0.000670844	0.0544285	0.000118897	0.0280278	0.000618632	0.0544285	0.000250748	0.0395661
cg24038454	36003449	14	INSM2	5'UTR	Island	0.000783001	0.0659636	0.000119057	0.0280466	0.000825979	0.0659636	4.40892e-05	0.0129067
cg22127570	174443366	4	NA		Island	0.00148324	0.182743	0.000119161	0.0280515	0.00121753	0.182743	7.35186e-05	0.0181245
cg10453365	90039909	15	RHCG	TSS200	Island	0.00121182	0.111106	0.000119252	0.0280515	0.00105422	0.111106	0.000202396	0.0343873
cg23681664	9746637	3	CPNE9	Body	Island	0.000847944	0.0592897	0.000119441	0.0280515	0.00070301	0.0592897	9.53411e-05	0.0214795
cg03470772	85503328	4	CDS1	TSS1500	N_Shore	0.00242466	0.258282	0.000119506	0.0280515	0.0022533	0.258282	0.000248526	0.0393576
cg01135780	158527707	5	EBF1	TSS1500	Island	0.000650864	0.0412873	0.000119564	0.0280515	0.000646265	0.0412873	0.000149331	0.0288141
cg18747039	100650031	13	NA		Island	0.00119911	0.168124	0.000119581	0.0280515	0.00104441	0.168124	0.000205278	0.034697
cg02365514	144798535	8	MAPK15	1stExon	Island	0.000680711	0.027809	0.000119639	0.0280515	0.000623964	0.027809	0.000253443	0.0398655
cg02330121	118228514	6	SLC35F1	TSS200	Island	0.000337742	0.0223886	0.000119811	0.028055	0.000326501	0.0223886	0.00020026	0.0341405
cg04299135	129244441	11	BARX2	TSS1500	Island	0.000180508	0.0256751	0.000119815	0.028055	0.000152226	0.0256751	0.000134764	0.0268525
cg24306982	119549312	1	NA		Island	0.00121968	0.129713	0.0001199	0.028055	0.00101896	0.129713	0.000113492	0.0239172
cg05380821	108491108	6	NR2E1	Body	Island	0.00117656	0.101841	0.000119975	0.028055	0.000968243	0.101841	7.97047e-05	0.0190383
cg24342377	97868109	7	TECPR1	Body		0.000613243	0.967953	0.000120069	0.0280583	0.000604152	0.967953	0.000165498	0.0307474
cg04614997	27333185	17	SEZ6	TSS200	Island	0.000123521	0.0168745	0.00012054	0.0281495	0.000116436	0.0168745	0.00023636	0.0380161
cg01302656	29254853	14	LINC01551	Body	Island	0.00181042	0.249484	0.000120758	0.0281817	0.0015011	0.249484	9.72048e-05	0.0217422
cg25079743	30441674	16	DCTPP1	TSS1500	Island	0.000253692	0.0198164	0.00012085	0.0281842	0.000280826	0.0198164	7.04739e-06	0.0037447
cg03384825	57889604	1	DAB1	5'UTR	Island	0.000205322	0.0186111	0.000121113	0.028215	0.000188406	0.0186111	0.000255738	0.0399571
cg05503968	30051336	18	GAREM	TSS1500	Island	0.000636329	0.037391	0.000121143	0.028215	0.000571461	0.037391	0.000249557	0.0394493
cg10947146	11058710	8	XKR6	1stExon	Island	0.0011758	0.0767466	0.000121874	0.0283292	0.00125771	0.0767466	2.9578e-05	0.0099923
cg23629998	123672780	7	TMEM229A	1stExon	Island	0.00101148	0.0679389	0.000121893	0.0283292	0.000827219	0.0679389	6.87302e-05	0.0173078
cg09275667	55881083	15	PYGO1	TSS200	Island	0.00102392	0.0834074	0.000121926	0.0283292	0.00081088	0.0834074	1.91031e-05	0.00730931
cg10795738	33936171	5	RXFP3	TSS1500	Island	0.000571989	0.0623008	0.000121957	0.0283292	0.000516009	0.0623008	0.000254336	0.0399255
cg09360770	86600326	16	FOXC2	TSS1500	Island	0.000464235	0.0364131	0.000122192	0.0283648	0.000393882	0.0364131	0.000153616	0.0293495
cg11687036	147139563	3	NA		Island	0.00176707	0.318907	0.000122338	0.0283799	0.00145962	0.318907	9.05757e-05	0.0207503
cg11131532	48099323	20	KCNB1	TSS200	Island	0.000695129	0.0271337	0.000122491	0.0283966	0.000598898	0.0271337	0.000189112	0.0330121
cg09032310	141262801	5	NA		N_Shore	0.000335258	0.0230586	0.000122695	0.028424	0.000305028	0.0230586	0.000259143	0.0402374
cg01844642	51989764	3	GPR62	1stExon	Island	0.00157328	0.500739	0.000122772	0.028424	0.00137884	0.500739	0.000222768	0.0365869
cg26119090	26468346	2	HADHA	TSS1500	Island	0.00104087	0.0429257	0.000123594	0.0285646	0.000770853	0.0457091	0.0513934	0.499689
cg07354515	11653827	12	NA		S_Shore	0.000905966	0.153004	0.000123596	0.0285646	0.000919482	0.153004	0.000110035	0.0234571
cg15123984	174151634	5	MSX2	5'UTR	Island	0.00218728	0.188875	0.000123624	0.0285646	0.00180465	0.188875	8.95053e-05	0.020586
cg21715488	176949630	2	EVX2	TSS1500	Island	0.000411234	0.0370051	0.000124151	0.0286547	0.00040578	0.0370051	0.000167643	0.030936
cg16001722	127836159	6	SOGA3	Body	Island	0.00143209	0.077745	0.000124178	0.0286547	0.00114954	0.077745	3.72235e-05	0.0115543
cg00942219	85203635	16	NA		Island	0.00262487	0.222266	0.00012432	0.0286687	0.00221612	0.222266	0.000145365	0.0283301
cg07687332	97285776	6	GPR63	TSS1500	Island	0.000397183	0.0353789	0.000124518	0.0286953	0.000371984	0.0353789	0.000252356	0.0397601
cg11456013	111192760	6	NA		N_Shelf	0.00139906	0.84523	0.000125218	0.0288188	0.0013343	0.84523	0.000231556	0.037502
cg27245512	230562591	1	NA		Island	0.000818656	0.0723235	0.000125317	0.0288188	0.000697923	0.0723235	0.000170408	0.0311671
cg27005179	37856786	17	ERBB2	5'UTR	Island	0.000418914	0.017782	0.000125395	0.0288188	0.000395184	0.017782	0.000246424	0.0391133
cg01286655	12031099	11	DKK3	TSS1500	S_Shore	0.00187018	0.191988	0.000125438	0.0288188	0.00175121	0.191988	0.00025451	0.0399255
cg02707264	39851931	3	MYRIP	5'UTR	S_Shore	0.000367266	0.0357684	0.000125465	0.0288188	0.000309438	0.0357684	0.000141979	0.0278096
cg11089595	85094437	8	RALYL	TSS1500	N_Shelf	0.00179446	0.111929	0.000126011	0.0288922	0.00150942	0.111929	0.000138939	0.0273554
cg04865110	6202558	4	JAKMIP1	TSS1500	Island	0.000401539	0.0374127	0.000126016	0.0288922	0.000421912	0.0374127	5.2407e-05	0.0143678
cg21992250	60718709	11	SLC15A3	1stExon	Island	0.00140527	0.265589	0.000126033	0.0288922	0.00138533	0.265589	0.000172144	0.0312324
cg16792632	64761208	14	ESR2	TSS200	Island	0.000713482	0.0561243	0.000126687	0.0289296	0.00328922	0.131627	0.000180052	0.0320217
cg10088041	45670872	15	LOC145663	TSS200	Island	0.0003745	0.0268978	0.000126697	0.0289296	0.000778953	0.0561243	1.44145e-05	0.00610626
cg06634716	217311151	1	ESRRG	TSS200	Island	0.00182635	0.213506	0.000126828	0.0289296	0.000384584	0.0268978	9.01872e-05	0.0206922
cg01185433	175139081	4	NA		S_Shelf	0.000860426	0.0783136	0.000126843	0.0289296	0.00158585	0.213506	0.000213835	0.0357235
cg02841000	28642062	6	NA			0.00343951	0.130514	0.000126861	0.0289296	0.000791315	0.0783136	0.000268068	0.041099
cg09807565	56502788	4	NMU	TSS1500	S_Shore	0.000563572	0.0441094	0.000126951	0.0289296	0.000514255	0.0441094	0.000268855	0.0411294
cg07625840	119274341	4	PRSS12	TSS1500	Island	0.00103206	0.101464	0.000127036	0.0289296	0.000981966	0.101464	0.000238274	0.0382587
cg27094244	61335269	11	SYT7	Body	Island	0.00149002	0.0874995	0.000127044	0.0289296	0.00125623	0.0874995	0.000146269	0.0284588
cg23719318	20865651	2	GDF7	TSS1500	Island	0.00119504	0.0713307	0.000127076	0.0289296	0.00121926	0.0713307	0.000102851	0.0224754
cg08109850	219773886	2	NA		Island	0.000312136	0.0266774	0.000127112	0.0289296	0.000331836	0.0266774	3.78194e-05	0.0116465
cg19776616	129425330	7	NA		N_Shore	0.000638632	0.0614207	0.000127315	0.0289296	0.000657812	0.0614207	8.51985e-05	0.0198963
cg20288892	82072332	7	CACNA2D1	Body	Island	0.000559218	0.0362575	0.000127375	0.0289296	0.000479326	0.0362575	0.000186698	0.0327213
cg17026220	54410580	12	HOXC4	TSS200	N_Shore	0.000520226	0.0361591	0.00012741	0.0289296	0.000523049	0.0361591	0.000132638	0.0266139
cg00544436	34203564	6	HMGA1	TSS1500	Island	0.000747416	0.0470498	0.000127464	0.0289296	0.000785903	0.0470498	5.21105e-05	0.0143202
cg02886408	133796164	10	BNIP3	TSS1500	Island	0.00046213	0.0368639	0.000127512	0.0289296	0.000454206	0.0368639	0.000180211	0.0320338
cg07935568	49794126	13	MLNR	TSS1500	Island	0.00120349	0.129454	0.000127522	0.0289296	0.000940841	0.129454	1.00104e-05	0.0048103
cg10848640	4857082	4	NA		N_Shore	0.00172259	0.23991	0.000127602	0.0289296	0.00150998	0.23991	0.000233048	0.037672
cg09267113	98030324	7	BAIAP2L1	5'UTR	Island	0.000607741	0.0393135	0.000127884	0.0289748	0.000569468	0.0393135	0.000258559	0.0402002
cg13765785	123524938	11	SCN3B	1stExon	Island	0.000406003	0.0418085	0.000128186	0.0290162	0.000367813	0.0418085	0.000269664	0.0411294
cg04943625	64578131	10	EGR2	5'UTR	Island	0.00121381	0.0958094	0.000128232	0.0290162	0.00113294	0.0958094	0.000262855	0.0406514
cg20361154	22862884	22	ZNF280B	5'UTR	Island	0.000379064	0.0217812	0.000128353	0.0290248	0.000386625	0.0217812	0.000104443	0.0226655
cg24631913	87971905	5	LINC00461	Body	Island	0.000846766	0.0606795	0.000128628	0.0290591	0.000797386	0.0606795	0.000254737	0.0399255
cg11873482	97361244	7	TAC1	TSS200	Island	0.00127866	0.0707215	0.000128744	0.0290591	0.00108092	0.0707215	0.00015566	0.0294984
cg01357116	94749496	4	ATOH1	TSS1500	Island	0.000860844	0.0694722	0.000128755	0.0290591	0.000745252	0.0694722	0.000211453	0.0354101
cg06943420	1566699	1	MMP23A	TSS1500	Island	0.00110949	0.0638219	0.000129643	0.0292407	0.000996793	0.0638219	0.000268216	0.041099
cg12744820	137814960	6	OLIG3	1stExon	Island	0.00193693	0.0971374	0.000130342	0.029362	0.00154533	0.0971374	3.19187e-05	0.0104845
cg10625533	233498682	2	EFHD1	1stExon	Island	0.000966065	0.103561	0.000130389	0.029362	0.000822385	0.103561	0.000175781	0.0315672
cg07602744	157484164	7	PTPRN2	Body	Island	0.000908984	0.060406	0.000130432	0.029362	0.000890623	0.060406	0.00019074	0.0331639
cg03110382	98956268	10	NA		Island	0.000655613	0.0548559	0.000130647	0.0293683	0.000702371	0.0548559	3.06033e-05	0.0101573
cg01789150	28241495	1	RPA2	TSS1500	Island	0.000825151	0.0636622	0.000130648	0.0293683	0.000848403	0.0636622	9.09128e-05	0.0208003
cg15423212	71115225	2	NA		Island	0.00108578	0.137552	0.000130712	0.0293683	0.000981363	0.137552	0.000274244	0.0415135
cg22892110	144798631	8	MAPK15	Body	Island	0.00190619	0.222409	0.000131492	0.0295246	0.00149319	0.222409	1.244e-05	0.00558642
cg21004042	70033902	1	NA		Island	0.000891984	0.0736737	0.000131624	0.0295354	0.00071162	0.0736737	3.25553e-05	0.0106348
cg26060489	1604990	6	NA		Island	0.00148162	0.274201	0.000131999	0.0295835	0.00123398	0.274201	0.000122835	0.0252918
cg21897845	71055838	15	UACA	1stExon	Island	0.000562047	0.0460772	0.000132008	0.0295835	0.000545923	0.0460772	0.00021062	0.0353157
cg08360721	169930870	5	KCNIP1	TSS200	N_Shore	0.000914789	0.111188	0.000132139	0.0295939	0.000843454	0.111188	0.000278288	0.0418414
cg01192900	111383668	11	MIR34B	Body	Island	0.000681588	0.0631815	0.000132742	0.0297098	0.000634941	0.0631815	0.000273366	0.0414889
cg16512615	141490351	4	UCP1	TSS1500	Island	0.00091126	0.0479775	0.000132905	0.0297274	0.000789548	0.0479775	0.000221367	0.0364766
cg15019790	45236267	2	SIX2	1stExon	Island	0.000246927	0.0279501	0.000133146	0.0297623	0.000235833	0.0279501	0.000242749	0.0387408
cg03468249	290317	2	NA		S_Shore	0.000302404	0.0229261	0.000133695	0.0298527	0.000261773	0.0229261	0.000220639	0.0364246
cg24221648	79170283	13	NA		Island	0.00129584	0.0660596	0.000133721	0.0298527	0.00110473	0.0660596	0.000185313	0.0325601
cg23805357	25464139	10	LOC100128811	Body	Island	0.00147962	0.0800093	0.000133809	0.0298533	0.00116604	0.0800093	1.85382e-05	0.00721374
cg27265170	50889510	1	DMRTA2	TSS1500	Island	0.00102106	0.111761	0.000134338	0.0299522	0.000851488	0.111761	0.000129387	0.0261635
cg01499217	10454681	18	APCDD1	5'UTR	Island	0.000208348	0.017154	0.000134807	0.0300375	0.000191153	0.017154	0.000284474	0.0423835
cg08843809	6679484	17	FBXO39	TSS200	Island	0.00126701	0.127444	0.000135009	0.030062	0.00107244	0.127444	0.000169323	0.0311078
cg26347408	24123421	15	NA		Island	0.00228002	0.128787	0.000135088	0.030062	0.00204784	0.128787	0.000279748	0.0419592
cg13167753	210112031	1	SYT14	Body	Island	0.00098516	0.1264	0.000135495	0.0301257	0.000787783	0.1264	3.82847e-05	0.0117586
cg24567591	3931229	16	CREBBP	TSS1500	Island	0.00107235	0.163173	0.000135547	0.0301257	0.000999165	0.163173	0.000278834	0.0418822
cg04769392	80579458	6	NA			0.000797236	0.0688856	0.000135666	0.0301329	0.000844871	0.0688856	4.49746e-05	0.0130254
cg05236879	60292509	15	NA		S_Shore	0.000669043	0.067456	0.000135886	0.0301628	0.000625723	0.067456	0.000276056	0.0416437
cg19945840	1168036	1	SDF4	TSS1500	Island	0.00154919	0.481829	0.000136087	0.0301881	0.00160226	0.481829	8.37673e-05	0.0197063
cg00182727	44640501	20	MMP9	Body	Island	0.00100583	0.174161	0.000136363	0.0302302	0.000808297	0.174161	4.71671e-05	0.0134367
cg10715223	101661788	8	SNX31	1stExon	Island	0.00145295	0.0768431	0.000136608	0.0302653	0.00125291	0.0768431	0.000218111	0.0361427
cg01330060	47960809	19	SLC8A2	Body	Island	0.00158528	0.122402	0.000136723	0.0302717	0.00131718	0.122402	0.000123214	0.0253253
cg02788146	134717975	10	NA		N_Shore	0.000527907	0.0476898	0.000136931	0.0302987	0.000492192	0.0476898	0.00028095	0.0420558
cg25185173	154712580	4	NA		Island	0.000779912	0.0387056	0.000137081	0.0303125	0.000693806	0.0387056	0.000274613	0.0415154
cg11108060	111879843	2	BCL2L11	5'UTR	Island	0.000418733	0.0323685	0.000137491	0.030384	0.000422211	0.0323685	0.000136733	0.0271007
cg00759420	170239089	6	NA		Island	0.00118428	0.881912	0.000138435	0.0305734	0.00115647	0.881912	0.000209223	0.0352052
cg26731781	28494031	13	PDX1	TSS200	Island	0.0010687	0.145141	0.000138589	0.030588	0.000996252	0.145141	0.000284459	0.0423835
cg17611951	82792105	7	PCLO	5'UTR	Island	0.00107795	0.077481	0.000138921	0.030625	0.000857164	0.077481	3.17422e-05	0.0104461
cg11814235	28621490	18	DSC3	Body	Island	0.00135113	0.124608	0.000138931	0.030625	0.00114845	0.124608	0.000186961	0.032751
cg16386080	90589146	9	CDK20	Body	N_Shore	0.00117113	0.231414	0.000139185	0.0306487	0.0010765	0.231414	0.000293969	0.0432886
cg10667877	70745342	8	SLCO5A1	5'UTR	Island	0.000413037	0.0225093	0.000139214	0.0306487	0.00039876	0.0225093	0.000233759	0.0377539
cg19049194	175193754	2	NA		Island	0.00132231	0.193393	0.000139516	0.0306958	0.00120687	0.193393	0.000295613	0.0434144
cg06368558	26735884	1	LIN28A	TSS1500	N_Shore	0.000499931	0.0369462	0.000140331	0.0308382	0.000462905	0.0369462	0.000292903	0.0431727
cg17599609	95285450	1	SLC44A3	TSS1500	N_Shore	0.00184409	0.377544	0.000140339	0.0308382	0.00162559	0.377544	0.000268962	0.0411294
cg02583938	19748777	22	TBX1	Body	Island	0.000721512	0.0700741	0.000140619	0.0308719	0.000634289	0.0700741	0.000265028	0.0408431
cg00025981	42031281	13	RGCC	TSS1500	Island	0.000354711	0.026529	0.000140669	0.0308719	0.000333367	0.026529	0.000279782	0.0419592
cg14649073	113437118	13	ATP11A	Body	N_Shelf	0.00245412	0.79159	0.000140973	0.0309191	0.00216782	0.79159	0.000273494	0.0414889
cg21678461	20180700	11	DBX1	Body	N_Shore	0.000209617	0.0263806	0.000141409	0.0309824	0.000174392	0.0263806	0.000132569	0.0266139
cg00376544	6679348	17	FBXO39	TSS1500	Island	0.00162805	0.0669704	0.000141476	0.0309824	0.00129852	0.0669704	3.77411e-05	0.0116465
cg19292062	524344	20	CSNK2A1	1stExon	Island	0.000645883	0.0672556	0.000141527	0.0309824	0.000554305	0.0672556	0.000216099	0.0358961
cg19556343	22370046	21	NCAM2	TSS1500	Island	0.00139946	0.127365	0.000142242	0.0311118	0.00111907	0.127365	4.24405e-05	0.0126294
cg05329692	102891280	10	TLX1NB	TSS1500	Island	0.0010922	0.0787053	0.000142296	0.0311118	0.000880313	0.0787053	5.71913e-05	0.0153815
cg07254032	45695839	5	HCN1	1stExon	Island	0.00112502	0.185274	0.000142496	0.0311361	0.000877866	0.185274	1.22271e-05	0.00551919
cg00197517	5197468	18	LOC642597	TSS1500	S_Shore	0.0014907	0.133709	0.000143265	0.0312671	0.00129825	0.133709	0.000252957	0.0398071
cg23989673	53098257	15	NA		Island	0.000936816	0.0710292	0.000143275	0.0312671	0.000793279	0.0710292	0.000184401	0.0324771
cg25691834	73097212	7	DNAJC30	1stExon	Island	0.000310856	0.019319	0.000143713	0.0313354	0.0002839	0.019319	0.000304131	0.0440382
cg03065467	109093243	4	LOC641518	TSS200	Island	0.000478967	0.0475516	0.000143834	0.0313354	0.000482959	0.0475516	0.000143008	0.0279659
cg25744767	79764178	7	GNAI1	1stExon	Island	0.00268362	0.133984	0.000143856	0.0313354	0.00221848	0.133984	0.000119251	0.0247432
cg21023831	218769784	2	TNS1	5'UTR		-0.00186207	0.772727	0.00014412	0.0313732	-0.00178015	0.772727	0.000260527	0.0403986
cg09170903	62457209	15	C2CD4B	5'UTR	Island	0.00059418	0.032489	0.000144373	0.0314088	0.000611893	0.032489	9.77345e-05	0.0217985
cg26252281	146864885	6	RAB32	1stExon	Island	0.00134261	0.0459223	0.000144507	0.0314184	0.0011261	0.0459223	0.000160094	0.0300779
cg26726141	64612159	17	PRKCA	Body		-0.00127622	0.967592	0.000144991	0.0315029	-0.00131454	0.967592	9.77922e-05	0.0217985
cg08184652	162270993	2	NA		Island	0.00156952	0.114187	0.000145076	0.0315029	0.00127905	0.114187	8.40395e-05	0.0197063
cg24144083	36805814	3	NA		N_Shore	0.00137328	0.0498856	0.000145229	0.0315167	0.00115739	0.0498856	0.000174685	0.0314672
cg13168683	6202379	4	JAKMIP1	TSS200	Island	0.000245303	0.0221867	0.000145725	0.0316047	0.000249892	0.0221867	0.000121529	0.0250724
cg15463803	113436765	4	NEUROG2	5'UTR	Island	0.000841706	0.0908272	0.000145954	0.0316167	0.000866746	0.0908272	9.90069e-05	0.021955
cg16526416	20184487	11	NA		N_Shore	0.00147183	0.0920126	0.000146051	0.0316167	0.00117479	0.0920126	4.16927e-05	0.0125027
cg05725804	114516219	5	TRIM36	1stExon	Island	0.000981605	0.0893041	0.000146052	0.0316167	0.00103451	0.0893041	5.72476e-05	0.0153815
cg27348266	104583972	14	NA		Island	0.00166239	0.233532	0.000146154	0.0316194	0.00128707	0.233532	7.69867e-06	0.00396058
cg15027907	48076699	19	NA		Island	0.00234888	0.163889	0.000146531	0.0316742	0.00194095	0.163889	0.000121579	0.0250724
cg26685195	220101368	1	SLC30A10	1stExon	Island	0.00111529	0.122389	0.000146589	0.0316742	0.000989289	0.122389	0.000291347	0.0430285
cg03599078	8078314	10	NA		Island	0.00177842	0.18026	0.000146806	0.0317015	0.0013807	0.18026	9.51815e-06	0.00464393
cg22163674	41877442	15	NA		Island	0.00137834	0.203437	0.000146937	0.0317102	0.00131299	0.203437	0.000271708	0.0413228
cg24082871	27333407	17	SEZ6	TSS1500	S_Shore	0.000526134	0.0350657	0.000147498	0.0318118	0.000425146	0.0350657	6.67503e-05	0.0170197
cg03805406	10383660	6	NA		Island	0.000706332	0.0720291	0.000147704	0.0318366	0.000626023	0.0720291	0.000292579	0.0431682
cg19160878	197665024	2	GTF3C3	TSS1500	S_Shore	0.000617965	0.978853	0.000147832	0.0318445	0.000578006	0.978853	0.000299288	0.0437233
cg26626185	74808370	16	FA2H	Body	Island	0.000203996	0.0152595	0.000148098	0.0318821	0.00019416	0.0152595	0.000274451	0.0415154
cg18030960	13530948	4	NA		Island	0.000995809	0.0962553	0.000148323	0.0319038	0.000856643	0.0962553	0.000234974	0.0378977
cg20150887	43210745	17	PLCD3	TSS1500	Island	0.000505656	0.0600907	0.000148381	0.0319038	0.000472765	0.0600907	0.00030076	0.0438025
cg01930746	10950511	2	PDIA6	Body	N_Shore	-0.00120766	0.081524	0.000148534	0.0319172	-0.00114074	0.081524	0.000288061	0.0427541
cg18601714	25485531	17	NA			-0.000255478	0.975456	0.000148768	0.0319478	-0.000245868	0.975456	0.000255214	0.0399571
cg01445827	96952956	1	NA			-0.00123851	0.939475	0.000148898	0.031956	-0.00133848	0.939475	2.66563e-05	0.00931011
cg02249074	99639692	9	NA		Island	0.000996578	0.0963738	0.000149529	0.0320717	0.000883096	0.0963738	0.000296246	0.0434709
cg14906455	2628088	17	NA		Island	0.000894866	0.029676	0.000149698	0.0320885	0.000923318	0.029676	9.75871e-05	0.0217953
cg16096796	8290295	11	NA		Island	0.000476689	0.0523624	0.00014983	0.032097	0.000426216	0.0523624	0.000307407	0.0442387
cg02705837	7554666	17	ATP1B2	1stExon	Island	0.000435327	0.0299204	0.000150302	0.0321784	0.000388025	0.0299204	0.000305122	0.0440382
cg04488074	88460610	16	NA		S_Shore	-0.00110642	0.952893	0.00015059	0.0322203	-0.00110599	0.952893	0.000170723	0.0311708
cg10824063	20690934	11	NELL1	TSS200	Island	0.00154528	0.11993	0.000150915	0.0322703	0.00122048	0.11993	2.80112e-05	0.00961634
cg12209165	132073546	5	KIF3A	TSS1500	S_Shore	0.00129647	0.0982287	0.000151146	0.0322902	0.00140496	0.0982287	2.45817e-05	0.00877481
cg24039697	8094534	10	FLJ45983	Body	Island	0.00354844	0.29274	0.000151193	0.0322902	0.00392818	0.29274	9.90852e-06	0.00478104
cg04266460	11348956	16	SOCS1	Body	Island	0.00381347	0.24448	0.00015131	0.0322954	0.00436396	0.24448	1.28023e-06	0.00107658
cg07778029	27205114	7	HOXA9	1stExon	Island	0.000854876	0.074892	0.00015159	0.0323118	0.000860772	0.074892	0.000154207	0.0293784
cg04275027	111098273	1	NA		Island	0.0013918	0.100417	0.000151649	0.0323118	0.00111632	0.100417	5.44559e-05	0.0148259
cg20956738	55108537	18	ONECUT2	Body	Island	0.00115611	0.0810764	0.000151664	0.0323118	0.00114515	0.0810764	0.00019426	0.0335081
cg25800765	85673347	12	ALX1	TSS1500	N_Shore	0.00163774	0.182249	0.000151811	0.0323234	0.00148945	0.182249	0.000321422	0.0454927
cg11418477	175199741	2	SP9	TSS200	Island	0.000968774	0.0966093	0.000152663	0.0324851	0.000928582	0.0966093	0.000270123	0.0411569
cg04738965	147127662	3	ZIC1	1stExon	Island	0.00176439	0.115461	0.000152835	0.032502	0.00142683	0.115461	7.31945e-05	0.0180701
cg03996195	55095229	18	NA		Island	0.000799784	0.0494113	0.000152935	0.0325026	0.000747837	0.0494113	0.000309614	0.0444355
cg20682981	1962627	17	HIC1	3'UTR	S_Shore	0.00161007	0.145225	0.000153078	0.0325026	0.00141485	0.145225	0.000290569	0.0429965
cg26979056	21921839	22	UBE2L3	TSS200	N_Shore	0.000561172	0.0502946	0.000153261	0.0325026	0.000562817	0.0502946	0.000165503	0.0307474
cg26342078	89950796	15	NA		Island	0.000875415	0.0927287	0.000153273	0.0325026	0.000740496	0.0927287	0.000198563	0.0339835
cg20186067	129422439	7	NA		Island	0.000986519	0.0421436	0.000153303	0.0325026	0.000911217	0.0421436	0.000320978	0.0454784
cg16584406	137811110	6	NA		S_Shore	0.00255883	0.570762	0.000153547	0.0325284	0.0021764	0.570762	0.000214704	0.0357555
cg14263942	76555772	4	CDKL2	TSS200	Island	0.000193494	0.0152613	0.00015361	0.0325284	0.000201618	0.0152613	8.03823e-05	0.0191291
cg06544405	70536807	18	NA		Island	0.00199386	0.135497	0.000154456	0.0326876	0.00158169	0.135497	3.62759e-05	0.0113712
cg06960698	103054846	13	FGF14	TSS1500	S_Shore	0.000233381	0.0193222	0.00015466	0.032711	0.000217163	0.0193222	0.000317404	0.0452471
cg21984150	121648022	5	SNCAIP	5'UTR	Island	0.000424578	0.0272586	0.000154756	0.0327116	0.00035584	0.0272586	0.000173842	0.0313886
cg17420078	24473643	4	NA		Island	0.000847086	0.0580632	0.000154968	0.0327366	0.000768476	0.0580632	0.000327607	0.045977
cg07860673	28494996	13	PDX1	Body	Island	0.00122561	0.110778	0.000155095	0.0327437	0.00106136	0.110778	0.000264415	0.0407846
cg18944010	119522855	1	TBX15	5'UTR	S_Shore	0.00147518	0.181735	0.000155229	0.0327521	0.00117539	0.181735	4.42401e-05	0.0129077
cg03133371	41167673	8	SFRP1	TSS1500	S_Shore	0.000783445	0.0792664	0.000155395	0.0327675	0.000715463	0.0792664	0.000329134	0.0461297
cg01972751	137814728	6	OLIG3	1stExon	Island	0.000896881	0.0680833	0.000155559	0.0327822	0.000869667	0.0680833	0.000250286	0.039511
cg18347921	29975366	6	HLA-J	Body	Island	0.000721823	0.0696176	0.000155714	0.0327843	0.000737483	0.0696176	0.000123524	0.0253442
cg09890536	95582751	1	TMEM56	TSS200	Island	0.000610858	0.0606827	0.000155756	0.0327843	0.000536437	0.0606827	0.000294929	0.0433503
cg20337093	89621678	10	KILLIN	1stExon	N_Shore	0.000540825	0.0638766	0.00015619	0.032856	0.000467154	0.0638766	0.000260381	0.0403938
cg20577479	44435428	1	DPH2	TSS1500	Island	0.00048592	0.0532199	0.00015659	0.0329202	0.000514374	0.0532199	5.49316e-05	0.014885
cg01449663	8926249	17	NTN1	Body	Island	0.00104159	0.231924	0.000156695	0.0329224	0.000901276	0.231924	0.000265696	0.0408739
cg02605173	7566312	19	C19orf45	Body	Island	0.000605392	0.0608855	0.00015691	0.0329478	0.000571352	0.0608855	0.000304817	0.0440382
cg18595800	28891414	16	ATP2A1	Body	Island	0.000519701	0.046557	0.000157202	0.0329895	0.000555551	0.046557	4.1244e-05	0.0123954
cg03451029	79764387	7	GNAI1	1stExon	Island	0.000752096	0.044647	0.000157631	0.0330596	0.000622355	0.044647	0.000140288	0.0275555
cg02921779	52904682	4	SGCB	TSS200	Island	0.000544741	0.036097	0.000157951	0.0330998	0.000519213	0.036097	0.000289894	0.0429349
cg16303918	219848528	2	FEV	Body	N_Shore	0.00112967	0.134908	0.000158012	0.0330998	0.00118716	0.134908	6.7525e-05	0.0171174
cg15100100	77332993	1	ST6GALNAC5	TSS200	N_Shore	0.000685682	0.0552991	0.000158407	0.0331512	0.000615391	0.0552991	0.00032931	0.0461333
cg09526758	16758047	12	LMO3	5'UTR		0.00116027	0.0884497	0.000158447	0.0331512	0.000935489	0.0884497	7.11493e-05	0.0177531
cg24483552	67687060	8	SGK3	TSS1500	N_Shore	0.0001381	0.0148203	0.000158762	0.0331874	0.00012597	0.0148203	0.000334252	0.0465301
cg26985686	150864521	7	GBX1	1stExon	Island	0.000960938	0.0620409	0.000158904	0.0331874	0.000805831	0.0620409	0.000182303	0.0323131
cg16747109	111544463	4	PITX2	TSS1500	Island	0.00139275	0.138169	0.000158905	0.0331874	0.00123726	0.138169	0.000319743	0.0453868
cg09661809	74953082	11	NA		Island	0.000897894	0.0928358	0.000159138	0.0332163	0.000736443	0.0928358	0.000116472	0.0243805
cg15443952	100817963	7	NAT16	Body	Island	0.00133803	0.10332	0.000159304	0.0332313	0.00119361	0.10332	0.000325588	0.0458532
cg04855433	105663093	14	NA		Island	0.00162687	0.05885	0.000159551	0.0332629	0.00145426	0.05885	0.000328275	0.0460277
cg01764252	87991071	5	NA			0.00159278	0.131548	0.00015984	0.0333032	0.00162051	0.131548	0.000136936	0.0271255
cg14777768	170746265	3	SLC2A2	TSS1500	Island	0.00162731	0.121101	0.000159945	0.0333053	0.00156312	0.121101	0.00027796	0.0418342
cg17082347	68118006	15	SKOR1	1stExon	Island	0.000566729	0.0435152	0.000160859	0.0334758	0.00054366	0.0435152	0.000282138	0.0421792
cg17694795	67874366	8	NA		Island	0.000965797	0.121747	0.00016107	0.033486	0.000944125	0.121747	0.000239243	0.0383806
cg20665736	27110029	15	NA		N_Shelf	0.00029357	0.0287281	0.0001611	0.033486	0.000269877	0.0287281	0.000339044	0.0469914
cg14667871	15500833	5	FBXL7	Body	Island	0.000396061	0.026622	0.000161309	0.0335096	0.000324636	0.026622	0.000117112	0.0244445
cg03385864	43045368	17	C1QL1	1stExon	Island	0.000695174	0.0672831	0.000161929	0.0336157	0.000585849	0.0672831	0.000202261	0.0343873
cg24683414	92952581	1	GFI1	TSS1500	Island	0.0019378	0.212851	0.000162012	0.0336157	0.0019403	0.212851	0.000179156	0.0319274
cg00741624	93897389	14	UNC79	5'UTR	Island	0.00174309	0.241031	0.000162304	0.0336369	0.00135478	0.241031	1.38578e-05	0.00596289
cg23513966	76630209	15	ISL2	Body	Island	0.00148919	0.258225	0.000162307	0.0336369	0.00136912	0.258225	0.000341953	0.0471332
cg24934063	121944173	7	FEZF1	1stExon	Island	0.000688484	0.0463779	0.000162831	0.0337255	0.000568625	0.0463779	0.00014157	0.027745
cg05480021	128369756	3	RPN1	TSS200	Island	0.000229672	0.0199903	0.000163105	0.0337451	0.000223909	0.0199903	0.000248341	0.0393461
cg08454455	54972371	16	NA		Island	0.00125482	0.0767745	0.00016318	0.0337451	0.00112644	0.0767745	0.000339837	0.0470269
cg24975834	112720171	13	NA		N_Shore	0.000860207	0.0838468	0.000163215	0.0337451	0.000802245	0.0838468	0.000332647	0.0463586
cg15184687	112728885	13	NA		S_Shore	0.000606357	0.0509901	0.000163448	0.0337734	0.000561573	0.0509901	0.000339689	0.0470249
cg01906015	63161579	8	NKAIN3	1stExon	Island	0.00158495	0.107434	0.000164332	0.0339361	0.00130548	0.107434	0.000135384	0.0269401
cg19609502	40390957	22	FAM83F	5'UTR	Island	0.000266169	0.0293165	0.000164549	0.0339417	0.000246072	0.0293165	0.000342811	0.047186
cg00548708	48041547	17	NA		Island	0.00121178	0.104795	0.000164636	0.0339417	0.00113303	0.104795	0.000332451	0.0463586
cg02796545	33590466	13	KL	TSS200	Island	0.0010586	0.116631	0.000164669	0.0339417	0.000955288	0.116631	0.000346386	0.0473633
cg19031658	74964856	4	CXCL2	1stExon	Island	0.000245189	0.0248952	0.00016481	0.0339417	0.000214033	0.0248952	0.00030153	0.0438781
cg24163575	30261379	15	NA		Island	0.00219692	0.22933	0.000164926	0.0339417	0.0019878	0.22933	0.000348125	0.0474974
cg17816908	41167109	8	SFRP1	TSS200	Island	0.00116903	0.0810229	0.000164941	0.0339417	0.000975116	0.0810229	0.000175275	0.0315249
cg23011597	19190158	3	KCNH8	1stExon	S_Shore	0.00116085	0.0786294	0.000165121	0.0339586	0.000972688	0.0786294	0.000189781	0.0330665
cg18400845	31837960	11	PAX6	5'UTR	Island	0.000994456	0.10112	0.000165564	0.0340298	0.000905771	0.10112	0.000350722	0.0476922
cg23770904	61051561	20	GATA5	TSS1500	Island	0.000398689	0.0297377	0.000165952	0.034073	0.000345186	0.0297377	0.000285532	0.0425049
cg07322064	166720433	6	PRR18	3'UTR	Island	0.00191725	0.345137	0.000166015	0.034073	-0.000965338	0.936127	0.000356492	0.0479767
cg10969997	104842040	14	NA			-0.000937607	0.93708	0.000166067	0.034073	0.00167152	0.345137	0.000301992	0.0439089
cg13588023	43187227	21	RIPK4	1stExon	Island	0.000296014	0.0221422	0.000166376	0.0340996	0.000270835	0.0221422	0.000351559	0.0476966
cg14428146	23563925	8	NKX2-6	TSS200	Island	0.000659738	0.036646	0.000166392	0.0340996	0.000535119	0.036646	9.35274e-05	0.0212457
cg26851782	151304422	5	GLRA1	TSS200	Island	0.000254658	0.0239063	0.000166705	0.0341439	0.000232581	0.0239063	0.000352385	0.0477434
cg20049415	21377671	20	NKX2-4	1stExon	Island	0.00180964	0.125197	0.000166921	0.0341682	0.00151512	0.125197	0.000190204	0.0330872
cg18861189	34112244	6	NA		Island	0.000553133	0.0697695	0.000167131	0.0341694	0.000505167	0.0697695	0.000353792	0.0478414
cg01782227	36988778	14	NKX2-1	Body	Island	0.000165591	0.0265668	0.000167179	0.0341694	0.000151786	0.0265668	0.000351713	0.0476966
cg12334247	169312418	2	CERS6	TSS1500	Island	0.00079218	0.058771	0.00016722	0.0341694	0.000790336	0.058771	0.000194431	0.0335081
cg13888858	95572254	9	ANKRD19P	Body	Island	0.00114824	0.190414	0.000167844	0.0342769	0.00104163	0.190414	0.000355094	0.0479126
cg07279070	73148229	2	EMX1	Body	Island	0.00154823	0.188252	0.000168124	0.0343139	0.00128794	0.188252	0.000171567	0.0312181
cg06178563	21494712	20	NKX2-2	TSS200	Island	0.00141188	0.0950388	0.000168373	0.0343417	0.00115561	0.0950388	0.000121479	0.0250724
cg24881834	84140997	6	ME1	TSS1500	Island	0.00140245	0.186184	0.000168469	0.0343417	0.00124998	0.186184	0.000344347	0.0472584
cg16043144	83316378	15	CPEB1	Body	Island	0.000862091	0.0844074	0.000168554	0.0343417	0.000897886	0.0844074	9.02268e-05	0.0206922
cg24038058	1611745	6	FOXC1	1stExon	Island	0.000612627	0.0625122	0.00016937	0.0344877	0.000610487	0.0625122	0.000200009	0.0341405
cg00747944	54972845	16	NA		Island	0.00172767	0.139525	0.000170456	0.0346713	0.00148282	0.139525	0.000271803	0.0413228
cg24120696	53853604	8	NA		Island	0.000909133	0.0706111	0.000170566	0.0346713	0.000778929	0.0706111	0.000267076	0.0410321
cg04801402	46138912	6	ENPP5	TSS200		0.00107306	0.0855991	0.000170568	0.0346713	0.00108815	0.0855991	0.000154813	0.029432
cg05218976	37958522	19	ZNF570	TSS1500	N_Shore	0.00096653	0.0717198	0.000170755	0.0346891	0.000819712	0.0717198	0.000237171	0.0381115
cg19802865	38063813	14	FOXA1	Body	Island	0.000861415	0.0546688	0.000171246	0.0347517	0.000749816	0.0546688	0.00030922	0.0444355
cg01529637	50721911	20	ZFP64	Body	Island	0.00064857	0.0601148	0.000171289	0.0347517	0.000546306	0.0601148	0.000216587	0.03596
cg24469464	4860157	4	MSX1	TSS1500	Island	0.00253518	0.47254	0.000171362	0.0347517	0.00238514	0.47254	0.000336725	0.0467626
cg24656271	140793358	5	PCDHGA4	Body	N_Shore	0.00186499	0.361502	0.000171676	0.0347792	0.00180706	0.361502	0.000276808	0.041739
cg02819335	119810092	4	SYNPO2	1stExon		0.000214885	0.0143106	0.000171696	0.0347792	0.000205161	0.0143106	0.000309735	0.0444355
cg23588462	95357223	13	NA		N_Shore	0.00198429	0.225507	0.000172205	0.0348588	0.00172079	0.225507	0.000302421	0.0439321
cg04557883	3753083	6	PXDC1	TSS1500	S_Shore	0.00331504	0.228455	0.000172288	0.0348588	0.00325912	0.228455	0.000240166	0.0384866
cg13764991	1052046	9	DMRT2	Body	Island	0.00045415	0.0265749	0.000172484	0.034875	0.000419629	0.0265749	0.000359711	0.0482132
cg26585560	139509708	8	FAM135B	TSS1500	Island	0.000653821	0.0501015	0.000172568	0.034875	0.000530307	0.0501015	9.97223e-05	0.0220447
cg18531164	61120108	14	NA		N_Shelf	0.000797957	0.0688451	0.000172905	0.034923	0.000781408	0.0688451	0.00025147	0.0396622
cg05296818	61117162	14	SIX1	TSS1500	S_Shore	0.00123418	0.221434	0.000173892	0.0350969	0.00103798	0.221434	0.000216098	0.0358961
cg18651870	70535005	18	NETO1	TSS200	Island	0.00336423	0.247539	0.000173967	0.0350969	0.00259493	0.247539	1.02582e-05	0.00487582
cg09192030	7682912	7	RPA3	5'UTR	S_Shelf	0.00124453	0.902581	0.00017495	0.0352749	0.00123684	0.902581	0.000213996	0.0357333
cg14377594	1051505	9	DMRT2	5'UTR	N_Shore	0.00247509	0.223089	0.000175105	0.0352859	0.00206249	0.223089	0.000187708	0.0328326
cg09371853	48994877	19	LMTK3	Body	N_Shore	0.00106183	0.0758523	0.000175505	0.0353461	0.0010734	0.0758523	0.000167725	0.030936
cg13696752	4662858	9	SPATA6L	Body	Island	0.00153234	0.241999	0.000175795	0.0353809	0.0015366	0.241999	0.000190078	0.0330817
cg15972949	44240380	7	YKT6	TSS200	N_Shore	0.000420188	0.0337484	0.00017588	0.0353809	0.000448301	0.0337484	5.0178e-05	0.0139869
cg24771804	55107755	18	ONECUT2	Body	Island	0.000658724	0.0509751	0.000176108	0.0354064	0.000534195	0.0509751	0.000102894	0.0224754
cg13673164	110009509	1	SYPL2	1stExon	Island	0.00116636	0.0370338	0.000176756	0.0355162	0.0009916	0.0370338	0.000255665	0.0399571
cg02582387	20879813	1	FAM43B	1stExon	Island	0.00102882	0.0457215	0.00017689	0.0355166	0.000855969	0.0457215	0.000185175	0.0325587
cg01026458	91803805	8	NECAB1	TSS200	Island	0.00124574	0.121263	0.000176961	0.0355166	0.000975421	0.121263	2.69241e-05	0.00933474
cg12238343	33936402	5	RXFP3	TSS200	Island	0.00073985	0.0512406	0.00017729	0.0355413	0.000586698	0.0512406	4.86421e-05	0.013745
cg06879152	60937041	10	PHYHIPL	Body	Island	0.000585743	0.0552437	0.000177308	0.0355413	0.000549667	0.0552437	0.000351767	0.0476966
cg02063759	119543295	1	NA		Island	0.00141612	0.158666	0.000177389	0.0355413	0.00114922	0.158666	0.000106317	0.0229402
cg21547708	71161160	17	SSTR2	1stExon	Island	0.000872735	0.0786046	0.000177505	0.0355442	0.000725312	0.0786046	0.000182429	0.0323131
cg05708550	137688227	5	KDM3B	TSS200	Island	0.00111965	0.131287	0.000177799	0.0355828	0.00123465	0.131287	1.51239e-05	0.00625619
cg16584172	100633446	13	ZIC2	TSS1500	Island	0.00102703	0.169143	0.000178286	0.0356599	0.00109815	0.169143	4.77613e-05	0.0135279
cg22466995	170948896	4	MFAP3L	TSS1500	Island	0.000459571	0.0468029	0.00017886	0.0357543	0.000475366	0.0468029	0.000111902	0.0237262
cg27535757	30434129	6	NA		Island	0.00117547	0.0906039	0.000179503	0.0358495	0.00110948	0.0906039	0.000346498	0.0473633
cg02154186	26371353	8	PNMA2	5'UTR	Island	0.00182858	0.167398	0.000179614	0.0358495	0.00140245	0.167398	7.45504e-06	0.00387514
cg14266999	33240388	6	VPS52	TSS1500	S_Shore	0.00106752	0.0802084	0.000179644	0.0358495	0.00111069	0.0802084	9.90457e-05	0.021955
cg15923025	139927191	5	EIF4EBP3	TSS200	Island	0.000166655	0.0133971	0.000179865	0.0358609	0.00015091	0.0133971	0.000378719	0.0498301
cg17393267	192127356	3	FGF12	TSS1500	Island	0.000668422	0.0374955	0.000179906	0.0358609	0.000607021	0.0374955	0.000380891	0.0500084
cg23191956	29235123	14	FOXG1	TSS1500	Island	0.00110759	0.117768	0.000180869	0.0360232	0.000981496	0.117768	0.000363497	0.0485082
cg00976453	48099479	20	KCNB1	TSS1500	Island	0.000307635	0.0223598	0.000180926	0.0360232	0.00028027	0.0223598	0.000382778	0.0501452
cg23861715	99382235	9	CDC14B	TSS200	Island	0.00113301	0.0803926	0.000181141	0.0360454	0.00114789	0.0803926	0.00016707	0.0308908
cg05374654	94134666	11	GPR83	TSS200	Island	0.00130704	0.122737	0.000181467	0.0360706	0.00101016	0.122737	1.34134e-05	0.00587278
cg07642638	5891786	20	CHGB	TSS200	N_Shore	0.00156614	0.154293	0.000181474	0.0360706	0.00149665	0.154293	0.000325224	0.0458532
cg14186066	60976115	14	SIX6	1stExon	Island	0.000933141	0.0809644	0.00018194	0.0361428	0.000756117	0.0809644	0.00010658	0.0229725
cg05403387	12834926	19	TNPO2	TSS200	S_Shore	0.000154639	0.0154709	0.000183189	0.0363701	0.000152713	0.0154709	0.000240912	0.0385532
cg15506609	27206073	7	HOXA9	TSS1500	Island	0.00282631	0.350246	0.000183733	0.0364574	0.00265424	0.350246	0.000362885	0.0484714
cg14352658	134407172	9	UCK1	TSS1500	Island	0.00225275	0.432039	0.000184186	0.0365267	0.00217106	0.432039	0.000309762	0.0444355
cg21821833	42306493	3	CCK	TSS200	Island	0.00218961	0.139911	0.000184756	0.0366122	0.00168983	0.139911	1.28829e-05	0.00569039
cg13962212	30325907	6	NA			0.000332329	0.0273739	0.000184826	0.0366122	0.000316838	0.0273739	0.000335836	0.0466762
cg22070462	26395155	2	GAREML	TSS1500	N_Shore	0.00239881	0.872052	0.000185136	0.0366528	0.00245519	0.872052	0.000143017	0.0279659
cg16547027	24127588	18	KCTD1	5'UTR	Island	0.00178429	0.414237	0.000185551	0.0366863	0.00164285	0.414237	0.000389073	0.0506542
cg21415530	140715802	8	KCNK9	TSS1500	Island	0.0015161	0.17807	0.00018566	0.0366863	0.00138958	0.17807	0.000391728	0.0507919
cg01068944	9049273	20	NA		Island	0.00189006	0.0593509	0.000185772	0.0366863	0.00156917	0.0593509	0.000191371	0.0332244
cg06383163	139509073	8	FAM135B	TSS200	Island	0.00264729	0.236601	0.000185821	0.0366863	0.00210351	0.236601	5.83823e-05	0.0155352
cg18925726	23982474	14	NA			-0.000368929	0.987252	0.000185836	0.0366863	-0.000370155	0.987252	0.000199103	0.0340594
cg19275261	5630072	18	NA		Island	0.0017706	0.0914284	0.000185935	0.0366863	0.00139101	0.0914284	3.59671e-05	0.011315
cg24440468	73184642	7	CLDN3	TSS200	Island	0.000503866	0.042663	0.000186456	0.0367685	0.000404208	0.042663	8.24106e-05	0.0195057
cg00425710	56672671	16	MT1A	1stExon	S_Shore	0.00169127	0.855083	0.000186705	0.0367897	0.0017245	0.855083	0.000154439	0.0293784
cg03215137	54393687	12	HOXC9	TSS200	Island	0.00186495	0.140544	0.000186853	0.0367897	0.00171875	0.140544	0.000391089	0.0507551
cg10820926	30397408	14	PRKD1	TSS1500	Island	0.00130905	0.138826	0.000186992	0.0367897	0.00108449	0.138826	0.000185756	0.0326217
cg08084860	237080340	2	NA		Island	0.00107323	0.147808	0.000187026	0.0367897	0.00100063	0.147808	0.000379678	0.049914
cg18809289	45869816	10	ALOX5	1stExon	Island	0.000975638	0.12516	0.000187137	0.0367897	0.000984856	0.12516	0.000183021	0.0323884
cg25309017	128796266	5	ADAMTS19	Body	Island	0.000401346	0.0540851	0.000187195	0.0367897	0.000349061	0.0540851	0.000340087	0.0470274
cg13422850	135116388	9	NTNG2	Body	Island	0.00111325	0.0391168	0.000187421	0.0368107	0.00106792	0.0391168	0.000326355	0.0459173
cg18798289	72530245	5	NA		S_Shore	0.00187323	0.229176	0.000187512	0.0368107	0.00194943	0.229176	0.000103272	0.0225091
cg11718317	126873689	11	NA		Island	0.000520213	0.0669061	0.000188318	0.0369481	0.00043796	0.0669061	0.000244083	0.0388353
cg09054633	136834294	5	SPOCK1	5'UTR	Island	0.00208245	0.130181	0.000188543	0.0369678	0.00173153	0.130181	0.00020096	0.0342098
cg08550785	104513909	8	RIMS2	Body	Island	0.000346492	0.0250458	0.00018863	0.0369678	0.000343282	0.0250458	0.000239285	0.0383806
cg08602008	48076841	19	NA		Island	0.00270848	0.37487	0.000189165	0.0370332	0.00234928	0.37487	0.000337691	0.0468225
cg01055579	33469488	17	NLE1	TSS200	S_Shore	-0.000268364	0.0193246	0.000189193	0.0370332	-0.000259897	0.0193246	0.000304551	0.0440382
cg02972551	86668068	2	KDM3A	TSS1500	Island	0.000243685	0.022276	0.000189417	0.0370332	0.000254141	0.022276	9.92775e-05	0.0219809
cg20888142	12045662	3	SYN2	TSS200	Island	0.00105704	0.073194	0.000189466	0.0370332	0.00090004	0.073194	0.000284235	0.0423835
cg13037245	67141961	11	LOC100130987	Body	S_Shore	0.000716393	0.0543141	0.000189492	0.0370332	0.000671532	0.0543141	0.000376671	0.0496681
cg06237092	112403495	10	RBM20	TSS1500	Island	0.000308932	0.0266414	0.000189802	0.0370601	0.000328503	0.0266414	6.05899e-05	0.0159248
cg06588201	174430487	4	NA		Island	0.00133936	0.2846	0.000189923	0.0370601	0.00138548	0.2846	0.00011922	0.0247432
cg21817858	141133337	5	NA		Island	0.00360187	0.42731	0.000189948	0.0370601	0.00387468	0.42731	4.26442e-05	0.0126453
cg08785215	57993979	3	FLNB	TSS200	Island	0.000401674	0.0387115	0.000190257	0.0370997	0.000431551	0.0387115	4.44807e-05	0.0129455
cg27508769	7701802	19	STXBP2	TSS200	Island	0.000663133	0.0747664	0.000190478	0.037122	0.00069211	0.0747664	9.83492e-05	0.0218584
cg25479916	27841392	6	HIST1H4L	TSS200	S_Shore	0.000517221	0.0470388	0.000191494	0.0372992	0.000541164	0.0470388	9.33354e-05	0.0212246
cg11304212	34759018	6	UHRF1BP1	TSS1500	N_Shore	0.00175929	0.32237	0.000191793	0.0373203	0.0015762	0.32237	0.000399904	0.0515274
cg03438305	152082925	1	TCHH	Body	N_Shore	0.0015934	0.163191	0.000191865	0.0373203	0.00160637	0.163191	0.000191468	0.0332244
cg13421062	35301069	7	NA		N_Shore	0.00137201	0.111195	0.000191922	0.0373203	0.00121286	0.111195	0.000383511	0.0501452
cg01043119	119001529	10	SLC18A2	Body	Island	0.000401439	0.0345896	0.000192383	0.0373892	0.000379203	0.0345896	0.000368441	0.0489332
cg06201642	77333198	1	ST6GALNAC5	1stExon	Island	0.000416892	0.0359936	0.000192857	0.0374558	0.000366178	0.0359936	0.000373759	0.0493958
cg08370146	31849262	11	NA		S_Shore	0.00134829	0.134534	0.00019294	0.0374558	0.0012825	0.134534	0.000355278	0.0479126
cg00956199	8078325	10	NA		Island	0.00125343	0.108504	0.000193123	0.0374706	0.000996625	0.108504	6.4957e-05	0.0167173
cg12598803	170626541	3	EIF5A2	TSS200	Island	0.000530229	0.0463943	0.000193256	0.0374756	0.000546217	0.0463943	0.000132088	0.0265715
cg17569492	44026659	17	MAPT	5'UTR	Island	0.000291621	0.020607	0.000193571	0.0375003	0.000291887	0.020607	0.000214436	0.0357555
cg06816063	16222510	19	RAB8A	5'UTR	Island	-0.000122552	0.0123146	0.000193598	0.0375003	-0.000125172	0.0123146	0.000154348	0.0293784
cg03854796	31819162	11	PAX6	Body	N_Shore	0.00126822	0.256936	0.000193734	0.0375058	0.00103734	0.256936	0.000150441	0.0289802
cg01270246	51228270	19	CLEC11A	Body	Island	0.000376522	0.023536	0.000194095	0.0375547	0.000391776	0.023536	0.000107521	0.0231185
cg20339230	92937360	15	ST8SIA2	1stExon	Island	0.000891902	0.0740881	0.000194201	0.0375547	0.000706724	0.0740881	5.75857e-05	0.0154368
cg00603274	61596626	11	FADS2	Body	Island	0.000797639	0.0512898	0.000194336	0.0375602	0.0007012	0.0512898	0.000378754	0.0498301
cg00439658	72848669	17	GRIN2C	Body	Island	0.00129969	0.236377	0.000194918	0.0376518	0.00132447	0.236377	0.000163055	0.0303878
cg24789128	167232981	2	SCN9A	TSS1500	S_Shore	0.000231754	0.0173983	0.000195129	0.0376577	0.000200982	0.0173983	0.000348669	0.047553
cg17480760	86350889	8	CA3	TSS200	Island	0.00051998	0.0288078	0.000195164	0.0376577	0.000450376	0.0288078	0.000346148	0.0473569
cg14308313	134336336	11	NA		Island	0.000337965	0.0266952	0.000195388	0.0376801	0.000314096	0.0266952	0.00039979	0.0515274
cg17412248	44803411	20	CDH22	Body	Island	0.00110022	0.119044	0.000195745	0.0377171	0.000959485	0.119044	0.000364635	0.0485939
cg15515258	112728932	13	NA		S_Shore	0.00123614	0.0897912	0.000195795	0.0377171	0.00113089	0.0897912	0.000413545	0.0526642
cg10513437	170814177	5	NPM1	TSS1500	N_Shore	0.000777854	0.0424017	0.000196183	0.0377648	0.000785752	0.0424017	0.000189802	0.0330665
cg26056583	128651564	4	SLC25A31	1stExon	Island	0.000458136	0.981069	0.000196259	0.0377648	0.0004365	0.981069	0.000357198	0.0480235
cg08885800	201084119	1	NA		Island	0.0016178	0.214635	0.000196415	0.0377742	0.00152453	0.214635	0.000380634	0.0500021
cg06816235	27742219	11	BDNF	Body	Island	0.000781489	0.0529815	0.000197009	0.0378574	0.000639403	0.0529815	0.000155548	0.0294984
cg21564242	179754761	3	PEX5L	TSS1500	Island	0.000438223	0.0565233	0.000197065	0.0378574	0.000364413	0.0565233	0.000214369	0.0357555
cg16321523	82633764	8	ZFAND1	TSS1500	S_Shore	0.00102636	0.0668916	0.00019746	0.0379125	0.00102654	0.0668916	0.000221231	0.0364714
cg24175777	149119846	7	NA		Island	0.00035768	0.0349785	0.000197997	0.0379948	0.000362602	0.0349785	0.000180803	0.0321227
cg03839709	96743492	13	HS6ST3	1stExon	Island	0.00063008	0.0466948	0.000198509	0.0380721	0.000511705	0.0466948	0.000131733	0.0265306
cg03785696	27224460	7	HOXA11-AS	TSS1500	Island	0.000545236	0.0444598	0.000198678	0.038075	0.000542311	0.0444598	0.000239668	0.0384245
cg15219145	10411911	6	TFAP2A	Body	Island	0.000967941	0.0758373	0.000198826	0.038075	0.000852135	0.0758373	0.000391098	0.0507551
cg15814504	50694985	5	NA		Island	0.00108472	0.0588054	0.00019885	0.038075	0.000841449	0.0588054	2.20879e-05	0.00812503
cg13524919	34396506	21	NA		Island	0.00238478	0.391068	0.000199374	0.0381458	0.00186522	0.391068	3.45065e-05	0.0109939
cg20019985	32008961	11	NA		Island	0.00329075	0.228742	0.000199438	0.0381458	0.00255763	0.228742	2.48378e-05	0.00883919
cg13272644	37499476	1	GRIK3	Body	Island	0.00109944	0.0851318	0.00019976	0.0381865	0.000861536	0.0851318	3.79796e-05	0.0116854
cg13193455	38511455	1	POU3F1	1stExon	Island	0.000855431	0.080602	0.000199917	0.0381957	0.000760058	0.080602	0.00040824	0.052255
cg14636534	87968528	5	LINC00461	Body	N_Shore	0.00269388	0.325793	0.000200064	0.0381993	0.00223496	0.325793	0.000210596	0.0353157
cg25730441	90167783	14	NA		Island	0.000524991	0.0519227	0.000200155	0.0381993	0.000483586	0.0519227	0.000418492	0.0530625
cg06358541	102809984	10	NA		Island	0.000448153	0.0546744	0.000200683	0.0382659	0.000383887	0.0546744	0.000324878	0.0458532
cg25682299	79177886	13	POU4F1	TSS200	Island	0.000818995	0.0787081	0.000200722	0.0382659	0.000769525	0.0787081	0.000393951	0.0509573
cg02441747	110223646	4	COL25A1	1stExon	Island	0.00097772	0.0570488	0.000200847	0.0382688	0.000772216	0.0570488	5.44594e-05	0.0148259
cg12164922	61573309	8	NA			0.00105173	0.0837185	0.000201178	0.0383109	0.00104655	0.0837185	0.000241293	0.0385965
cg10437245	118896516	10	VAX1	Body	Island	0.00148547	0.179037	0.000202056	0.0384573	0.00128062	0.179037	0.00034729	0.0474018
cg26013434	72929394	11	P2RY2	1stExon	Island	0.000119746	0.016434	0.000202365	0.0384764	0.000110098	0.016434	0.000421274	0.0532
cg00023154	44872463	1	RNF220	5'UTR	Island	0.000663694	0.0708755	0.000202377	0.0384764	0.000690344	0.0708755	0.00011346	0.0239172
cg06038655	130419675	7	KLF14	TSS1500	S_Shore	0.00232775	0.144808	0.000202576	0.0384883	0.00221109	0.144808	0.000375317	0.0495455
cg09295081	11810183	2	NTSR2	1stExon	Island	0.00117433	0.0691832	0.000202659	0.0384883	0.000932255	0.0691832	6.78125e-05	0.0171571
cg07183447	102484107	10	NA		N_Shore	0.000621926	0.057806	0.000203115	0.0385518	0.000522272	0.057806	0.000260743	0.0404141
cg25643118	80657428	6	ELOVL4	TSS200	Island	0.000845792	0.0557747	0.000203223	0.0385518	0.000818251	0.0557747	0.000329424	0.0461333
cg14289542	112726662	13	NA		Island	0.00193997	0.185478	0.000203324	0.0385518	0.00149045	0.185478	1.2838e-05	0.00567818
cg04005480	122931308	6	PKIB	TSS200	Island	0.000283104	0.0249533	0.000204182	0.0386538	0.000289876	0.0249533	0.000156899	0.0296822
cg09864185	100914639	6	NA		N_Shore	0.00256049	0.190266	0.000204241	0.0386538	0.00245003	0.190266	0.000360648	0.0483018
cg17409313	42876939	20	GDAP1L1	Body	S_Shore	0.000982481	0.120168	0.000204312	0.0386538	0.000891989	0.120168	0.000432712	0.0541008
cg21185686	140810433	5	PCDHGA4	Body	N_Shore	0.00234364	0.199017	0.000204458	0.0386538	0.00217454	0.199017	0.000420125	0.053154
cg20083676	91605999	9	C9orf47	1stExon	Island	0.00197418	0.289264	0.000204466	0.0386538	0.00160281	0.289264	0.000137596	0.0271786
cg02228804	27775720	6	HIST1H2AI	TSS1500	Island	0.000313003	0.0302096	0.000204525	0.0386538	0.000316614	0.0302096	0.000193506	0.0334436
cg10686916	36004142	14	INSM2	1stExon	Island	0.00135532	0.176544	0.000204668	0.0386599	0.00147422	0.176544	3.20218e-05	0.0105085
cg06148685	113800909	9	LPAR1	TSS1500	Island	0.00045339	0.0274211	0.000205149	0.0387298	0.000378373	0.0274211	0.000240673	0.0385326
cg11871421	6679476	17	FBXO39	TSS200	Island	0.00176329	0.18427	0.00020529	0.0387355	0.00141332	0.18427	9.65913e-05	0.0216911
cg26156448	21378200	20	NKX2-4	TSS200	Island	0.000633716	0.0382528	0.00020546	0.0387467	0.000563032	0.0382528	0.00042007	0.053154
cg07566080	57889475	1	DAB1	5'UTR	Island	0.000702123	0.0392349	0.000205666	0.0387583	0.000581406	0.0392349	0.0002119	0.0354342
cg16928066	73147814	2	EMX1	Body	Island	0.0011653	0.180962	0.000205818	0.0387583	0.0011673	0.180962	0.000225574	0.036875
cg07079219	59323318	11	NA			0.0012214	0.168561	0.000205853	0.0387583	0.0012417	0.168561	0.000179649	0.0319826
cg04427498	20830657	7	NA		Island	0.00223319	0.52452	0.000206081	0.0387802	0.00219406	0.52452	0.000287455	0.042718
cg22390041	19226319	1	ALDH4A1	Body	N_Shelf	-0.000385072	0.976948	0.000206501	0.0388385	-0.000417606	0.976948	3.60394e-05	0.0113275
cg24881205	20826188	7	SP8	5'UTR	S_Shore	0.0014756	0.0964446	0.000206613	0.0388386	0.00127066	0.0964446	0.000353152	0.0478043
cg04723493	104310810	8	FZD6	TSS1500	Island	0.000521177	0.0487968	0.000206916	0.0388552	0.000438929	0.0487968	0.000278037	0.0418342
cg08453926	27131683	13	WASF3	TSS200	Island	0.00075235	0.0431665	0.000207023	0.0388552	0.00072587	0.0431665	0.000343011	0.047186
cg06704122	119604702	2	EN1	1stExon	N_Shore	0.0017593	0.0749455	0.000207035	0.0388552	0.00143895	0.0749455	0.000167271	0.0308953
cg05214404	37455362	4	C4orf19	TSS200	Island	0.000479252	0.0445635	0.00020775	0.0389686	0.000458952	0.0445635	0.000364244	0.0485787
cg19591056	240254988	1	FMN2	TSS200	Island	0.000588353	0.040946	0.000208473	0.0390723	0.000530158	0.040946	0.000439533	0.0546994
cg21595709	15344186	19	EPHX3	TSS1500	Island	0.00127676	0.208724	0.000208527	0.0390723	0.00111063	0.208724	0.000385256	0.0503071
cg11368643	140625059	5	PCDHB15	TSS200	N_Shore	0.00197754	0.237447	0.000208939	0.0391286	0.00164748	0.237447	0.000240368	0.0385014
cg19081437	46655796	17	HOXB4	TSS200	S_Shore	0.000309619	0.0239128	0.000209139	0.0391451	0.000330502	0.0239128	6.09076e-05	0.0159723
cg26872138	154797892	3	MME	TSS200	Island	0.000212569	0.0279471	0.00020937	0.0391675	0.00019403	0.0279471	0.000441615	0.0548415
cg07967210	47022446	17	SNF8	TSS1500	S_Shore	0.00240077	0.260516	0.000209713	0.0392105	0.00229539	0.260516	0.000371843	0.0491611
cg03032497	61108227	14	NA		N_Shore	0.00204346	0.330203	0.000210278	0.0392953	0.00207468	0.330203	0.000187689	0.0328326
cg12068816	40390595	22	FAM83F	TSS1500	Island	0.00132316	0.18808	0.000210848	0.0393574	0.00111932	0.18808	0.000301699	0.0438845
cg04077662	77333229	1	ST6GALNAC5	1stExon	Island	0.000513442	0.0295967	0.000210914	0.0393574	0.000456587	0.0295967	0.000432979	0.0541123
cg00484358	110610995	1	ALX3	Body	Island	0.00119898	0.384525	0.000210948	0.0393574	0.00114817	0.384525	0.000369746	0.0489813
cg19656282	74742786	2	TLX2	Body	Island	0.00153013	0.0990619	0.000211394	0.0394195	0.00127919	0.0990619	0.000257917	0.0401622
cg14415616	18486958	3	NA		Island	0.000568692	0.0384687	0.000211755	0.0394659	0.000615912	0.0384687	3.90532e-05	0.0119213
cg03534058	99381359	9	CDC14B	Body	Island	0.000273498	0.0183756	0.00021236	0.0395576	0.000263268	0.0183756	0.000357478	0.0480242
cg20980055	133562258	6	EYA4	TSS1500	Island	0.000337339	0.0261357	0.000212997	0.0396551	0.000287348	0.0261357	0.000330054	0.0462031
cg08502533	239549577	1	NA		N_Shore	0.000654955	0.0398331	0.000213333	0.0396965	0.000546629	0.0398331	0.000254576	0.0399255
cg17885226	105388731	6	NA		Island	0.00227467	0.287121	0.00021371	0.0397456	0.00178039	0.287121	4.24766e-05	0.0126294
cg19671533	84419234	6	SNAP91	TSS200	Island	0.00115017	0.079344	0.000214143	0.0397889	0.000893925	0.079344	3.01123e-05	0.0100901
cg09963640	31157661	18	ASXL3	TSS1500		0.000515093	0.0389144	0.000214171	0.0397889	0.000412285	0.0389144	0.000100232	0.0220943
cg10784386	79330943	5	THBS4	TSS200	Island	0.000678757	0.0620932	0.000214542	0.0398176	0.000575075	0.0620932	0.000314103	0.0449229
cg19972674	76142363	17	C17orf99	TSS200		0.0011566	0.933689	0.000214553	0.0398176	0.00114333	0.933689	0.000278752	0.0418822
cg12308664	27250344	7	NA		N_Shelf	0.0011422	0.185035	0.000214702	0.0398242	0.00102273	0.185035	0.000448765	0.0552975
cg09126024	60901838	2	NA			0.000271656	0.0278719	0.00021531	0.0399157	0.000260827	0.0278719	0.000369369	0.0489692
cg17882660	100637258	13	ZIC2	Body	Island	0.00140745	0.183506	0.000215742	0.0399446	0.00120957	0.183506	0.000365433	0.0486631
cg15916646	27225127	7	HOXA11-AS	Body	Island	0.00148755	0.308369	0.000215801	0.0399446	0.00128547	0.308369	0.000382337	0.050113
cg12307840	223538334	1	SUSD4	TSS1500	Island	0.00138012	0.129365	0.000215808	0.0399446	0.00115168	0.129365	0.000258133	0.0401622
cg24974737	21367368	17	NA		Island	0.00258003	0.265031	0.000216013	0.0399511	0.00260598	0.265031	0.000209421	0.0352216
cg21339533	23221367	7	NUPL2	TSS200	N_Shore	0.000333899	0.0358207	0.000216078	0.0399511	0.000348957	0.0358207	0.000109537	0.0233795
cg04408595	71802608	3	EIF4E3	5'UTR	Island	0.000367004	0.0289527	0.000216186	0.0399511	0.000331592	0.0289527	0.000456843	0.0559579
cg16939364	56015750	8	XKR4	1stExon	Island	0.00107722	0.104025	0.000217146	0.0400821	0.000862039	0.104025	0.000102334	0.0224352
cg05137358	37006127	13	CCNA1	1stExon	Island	0.000384872	0.0328033	0.000217186	0.0400821	0.000368478	0.0328033	0.000380508	0.0500021
cg07225598	228646916	1	HIST3H2A	TSS1500	S_Shore	0.00116972	0.0841029	0.000217238	0.0400821	0.00123954	0.0841029	7.82677e-05	0.0189041
cg07335556	68549407	15	NA			0.000876393	0.0853736	0.000217368	0.0400848	0.000847404	0.0853736	0.000352806	0.047782
cg26393541	183064952	4	MGC45800	Body	Island	0.000537836	0.0382142	0.000217554	0.040098	0.000459697	0.0382142	0.000350916	0.0476922
cg01354473	27204803	7	HOXA9	1stExon	Island	0.00134372	0.225154	0.000218032	0.0401353	0.00113774	0.225154	0.000318335	0.0453243
cg00750428	106975489	12	NA		Island	0.0011926	0.130021	0.000218176	0.0401353	0.0010046	0.130021	0.000299089	0.043723
cg17033854	37758493	17	NA		N_Shelf	0.00171911	0.452885	0.000218209	0.0401353	0.00164558	0.452885	0.000382973	0.0501452
cg19645221	38058284	14	NA		S_Shore	0.00140562	0.127529	0.000218224	0.0401353	0.00111394	0.127529	7.44152e-05	0.0182912
cg21902544	70211515	18	CBLN2	1stExon	Island	0.000728498	0.0462135	0.00021833	0.0401353	0.000604958	0.0462135	0.000242708	0.0387408
cg06759374	22414364	3	NA		Island	0.000459524	0.0319197	0.000218756	0.0401886	0.000368971	0.0319197	0.000114762	0.0240977
cg20491838	1611451	6	FOXC1	1stExon	Island	0.000962168	0.0963983	0.00021885	0.0401886	0.000811521	0.0963983	0.000305164	0.0440382
cg13458335	40254859	1	BMP8B	TSS1500	Island	0.000232219	0.0164609	0.000219222	0.0402358	0.000241259	0.0164609	0.00012672	0.0257882
cg05419198	145753896	8	C8orf82	Body	Island	0.00173523	0.217092	0.000219418	0.0402483	0.00141697	0.217092	0.000177253	0.031685
cg04802694	60797213	2	NA			0.000696142	0.0559632	0.000219717	0.0402483	0.000753424	0.0559632	4.19603e-05	0.0125522
cg14535884	117349621	9	ATP6V1G1	TSS1500	N_Shore	0.00216854	0.136146	0.000219735	0.0402483	0.00209661	0.136146	0.000356802	0.0479886
cg21146503	20178677	11	DBX1	Body	Island	0.00112697	0.173954	0.00021975	0.0402483	0.00111713	0.173954	0.000275981	0.0416437
cg17267256	113437985	4	NEUROG2	TSS1500	Island	0.00035645	0.0345737	0.000220024	0.0402669	0.000344254	0.0345737	0.000360199	0.04826
cg22795590	213401801	2	ERBB4	Body	N_Shore	0.000263771	0.019553	0.000220082	0.0402669	0.000225609	0.019553	0.000357781	0.048028
cg02560808	70835289	16	VAC14	TSS1500	Island	0.000554176	0.0381257	0.000220524	0.0403242	0.000583137	0.0381257	9.5355e-05	0.0214795
cg18566594	4381435	12	CCND2	TSS1500	Island	0.00111825	0.0798861	0.000220625	0.0403242	0.00127206	0.0798861	4.06584e-06	0.00253183
cg23996071	60280809	1	HOOK1	1stExon	Island	0.0013845	0.178916	0.000220782	0.0403317	0.00124133	0.178916	0.000462961	0.0564284
cg01088070	71665395	6	B3GAT2	Body	Island	0.000324562	0.0306749	0.000220943	0.04034	0.000283455	0.0306749	0.000420804	0.0532
cg23519626	74022930	11	P4HA3	TSS1500	S_Shore	0.00225127	0.256748	0.000221955	0.0405037	0.00183299	0.256748	0.000169112	0.0311078
cg04670857	79740208	2	CTNNA2	1stExon	Island	0.00212194	0.170287	0.000222413	0.0405648	0.00160434	0.170287	4.92853e-06	0.00289769
cg08057103	110438916	13	IRS2	TSS200	Island	0.0010884	0.0640487	0.000222521	0.0405648	0.000913096	0.0640487	0.000290841	0.0429965
cg15885628	28344718	15	OCA2	TSS1500	S_Shore	0.000370383	0.0490576	0.000222905	0.0406135	0.000342554	0.0490576	0.000460387	0.0562541
cg06617341	177005611	2	NA		Island	0.000506244	0.038078	0.00022335	0.0406735	0.00049331	0.038078	0.000337506	0.0468225
cg18368487	128994702	10	FAM196A	TSS1500	Island	0.00123996	0.048743	0.00022384	0.0407414	0.00113216	0.048743	0.000472791	0.0572139
cg09472203	83378614	15	AP3B2	1stExon	Island	0.000363647	0.0337813	0.000224186	0.0407831	0.000359461	0.0337813	0.000290796	0.0429965
cg00339556	16180048	5	2020-03-11	TSS200	Island	0.000409223	0.0323969	0.000224611	0.0408272	0.000341128	0.0323969	0.000268345	0.0411007
cg17456678	119532314	2	NA		Island	0.000512458	0.0338876	0.000224672	0.0408272	0.000398524	0.0338876	3.5234e-05	0.0111445
cg27315556	173115771	3	NLGN1	TSS1500	Island	0.00171007	0.123884	0.000224778	0.0408272	0.00131343	0.123884	1.73016e-05	0.00685282
cg12192112	95469201	5	NA			0.00269286	0.833716	0.000225129	0.0408697	0.00236754	0.833716	0.000444947	0.0550793
cg24824178	141263222	5	NA		S_Shore	0.000884647	0.0645566	0.000225359	0.0408714	0.000799211	0.0645566	0.0004767	0.0574249
cg22812770	52195547	1	OSBPL9	5'UTR	Island	0.00193668	0.0735866	0.000225372	0.0408714	0.00211639	0.0735866	3.06953e-05	0.0101686
cg09570682	106429443	6	NA		Island	0.000538122	0.0269272	0.000226314	0.0410028	0.00055306	0.0269272	0.000163133	0.0303878
cg05270617	23287263	10	ARMC3	Body		-0.00036675	0.966326	0.000226331	0.0410028	-0.000391139	0.966326	6.87711e-05	0.0173078
cg06760077	119068497	2	NA			0.00189651	0.611899	0.00022655	0.0410213	0.00186508	0.611899	0.00031159	0.0446365
cg10858215	177004604	2	NA		Island	0.000119138	0.0175983	0.000227583	0.0411869	0.000112606	0.0175983	0.000428114	0.0536986
cg00925616	32410211	1	NA		Island	0.000136181	0.0139531	0.000227923	0.0412131	0.000136066	0.0139531	0.000256905	0.0400806
cg18565103	26633265	1	UBXN11	5'UTR	Island	0.000691231	0.0391136	0.000227975	0.0412131	0.000761327	0.0391136	2.28324e-05	0.00827706
cg18875371	29244185	14	LINC01551	Body	S_Shore	0.00123775	0.0943812	0.000228081	0.0412131	0.000975852	0.0943812	6.73514e-05	0.0171003
cg10757065	223165891	2	CCDC140	5'UTR	N_Shore	0.000789069	0.0755184	0.000229057	0.0413613	0.000651096	0.0755184	0.000233144	0.037672
cg25940946	24181263	22	DERL3	TSS200	Island	0.000944758	0.0591412	0.000229137	0.0413613	0.00100141	0.0591412	8.27126e-05	0.0195507
cg09834794	147087702	3	NA			0.00161857	0.178484	0.00022942	0.041391	0.00136806	0.178484	0.000332888	0.0463586
cg03257172	200010283	1	NR5A2	Body	N_Shore	0.00169904	0.127281	0.00022956	0.0413949	0.00165349	0.127281	0.000350858	0.0476922
cg06889481	219827660	2	NA		Island	0.00103046	0.106947	0.000229818	0.0414071	0.00097825	0.106947	0.000424534	0.0533944
cg23882862	111169795	11	COLCA1	5'UTR	Island	0.000174064	0.0212289	0.000229986	0.0414071	0.000145923	0.0212289	0.000299599	0.0437233
cg00215432	219866437	2	MIR375	TSS200	Island	0.000423613	0.0240978	0.000230061	0.0414071	0.000357223	0.0240978	0.000324739	0.0458532
cg05627083	10454684	18	APCDD1	5'UTR	Island	0.00037626	0.0172953	0.000230101	0.0414071	0.000340341	0.0172953	0.000486762	0.0580375
cg15427886	55379663	8	NA		Island	0.00330226	0.155314	0.000230352	0.0414284	0.00263814	0.155314	0.000108821	0.0232797
cg10281977	105070864	14	TMEM179	1stExon	Island	0.00117506	0.0892587	0.000230562	0.0414284	0.00100164	0.0892587	0.000367087	0.0488462
cg04886642	72920359	17	OTOP2	TSS200	Island	0.000552781	0.0499786	0.000230575	0.0414284	0.000453454	0.0499786	0.000210687	0.0353157
cg14462779	76803669	10	DUPD1	Body	Island	0.00154597	0.480056	0.000230972	0.0414785	0.00143895	0.480056	0.000467869	0.056752
cg24575676	180726035	2	ZNF385B	1stExon	Island	0.000734907	0.0435995	0.000231124	0.0414845	0.00064541	0.0435995	0.000455447	0.0558882
cg27533288	118896776	10	VAX1	Body	Island	0.00139537	0.0740209	0.000231379	0.0415088	0.00121086	0.0740209	0.000426648	0.0535723
cg20576153	60975841	14	SIX6	TSS200	Island	0.000963196	0.0912162	0.000232377	0.0416279	0.000806565	0.0912162	0.000300538	0.0437885
cg27615578	7953281	19	LRRC8E	TSS200	Island	0.00124256	0.0886199	0.00023254	0.0416279	0.000964808	0.0886199	3.56948e-05	0.011261
cg27550982	7701823	19	STXBP2	TSS200	Island	0.000226847	0.0167392	0.000232706	0.0416279	0.000241959	0.0167392	7.07778e-05	0.0176857
cg09630437	2740301	19	SLC39A3	TSS1500	Island	0.000839402	0.0830671	0.000232764	0.0416279	0.000898841	0.0830671	6.33228e-05	0.0164576
cg04684267	58694502	19	ZNF274	1stExon	Island	0.00105576	0.152317	0.000232794	0.0416279	0.000974085	0.152317	0.000483307	0.0578029
cg03688818	49711147	3	APEH	TSS1500	Island	0.000640748	0.0539106	0.000232845	0.0416279	0.00066135	0.0539106	0.00015489	0.029432
cg20433275	156358408	1	NA		S_Shore	0.00136747	0.0387491	0.000232875	0.0416279	0.0013305	0.0387491	0.00035644	0.0479767
cg19841369	64663928	14	SYNE2	Body		0.00279848	0.301723	0.000233194	0.0416542	0.0026918	0.301723	0.000393528	0.0509433
cg11375458	177003996	2	NA		N_Shore	0.00224196	0.445858	0.000233286	0.0416542	0.00233842	0.445858	0.000124784	0.0255279
cg00584000	152085187	1	TCHH	Body	Island	0.00046182	0.060814	0.00023338	0.0416542	0.000467336	0.060814	0.000219792	0.0363369
cg03876032	26501065	10	MYO3A	3'UTR	Island	0.00196599	0.22561	0.000233509	0.041656	0.00157151	0.22561	0.00011369	0.02393
cg15110296	12509705	12	LOH12CR1	TSS1500	N_Shore	-0.00314487	0.256594	0.000234316	0.0417581	-0.00280887	0.256594	0.000488756	0.0581908
cg04495995	19147157	7	NA		Island	0.000570809	0.0492849	0.00023432	0.0417581	0.000553762	0.0492849	0.000368113	0.0489268
cg02586610	122745092	3	SEMA5B	5'UTR	N_Shore	0.000797592	0.0445529	0.000235398	0.0419094	0.000667127	0.0445529	0.000300978	0.0438161
cg01263386	47933586	19	SLC8A2	Body	Island	0.000520514	0.0195104	0.000235408	0.0419094	0.000461494	0.0195104	0.00048171	0.0576893
cg06306198	147128998	3	ZIC1	Body	Island	0.00121813	0.226183	0.000235909	0.0419771	0.00112389	0.226183	0.000489597	0.0582344
cg09698655	83378321	15	AP3B2	Body	Island	0.000214513	0.0156333	0.000236258	0.0420028	0.000209641	0.0156333	0.000345522	0.0473265
cg19786627	29235904	14	FOXG1	TSS1500	Island	0.00110819	0.113284	0.000236382	0.0420028	0.000918229	0.113284	0.000262314	0.0405858
cg24035245	119535928	1	NA		Island	0.00215018	0.202157	0.000236413	0.0420028	0.00167795	0.202157	4.74804e-05	0.0134864
cg21116934	87034663	2	CD8A	5'UTR	Island	0.000600626	0.063705	0.000236665	0.0420261	0.000585337	0.063705	0.000356407	0.0479767
cg12043818	47008202	10	NA		Island	0.00212175	0.154178	0.000236852	0.0420265	0.0019818	0.154178	0.000473229	0.0572235
cg26299169	28498956	13	PDX1	3'UTR	Island	0.00142171	0.0785182	0.000237024	0.0420265	0.00115259	0.0785182	0.000170613	0.0311671
cg10344832	68119609	15	SKOR1	Body	Island	0.00141065	0.195335	0.000237027	0.0420265	0.00117064	0.195335	0.000270043	0.0411569
cg03350439	231299033	1	TRIM67	1stExon	Island	0.00185068	0.185352	0.000238453	0.0422579	0.00148707	0.185352	0.000137409	0.027173
cg20959460	77253544	5	NA		N_Shore	0.00202136	0.362173	0.000238692	0.0422788	0.00187892	0.362173	0.000485059	0.0579331
cg15811515	31580989	16	YBX3P1	TSS200	Island	0.00269167	0.101196	0.000239629	0.0424234	0.00218186	0.101196	0.000173258	0.0313393
cg12475507	3567852	1	TP73	TSS1500	Island	0.00212926	0.401346	0.000240028	0.0424724	0.00177864	0.401346	0.000303486	0.0440163
cg18156204	71948613	17	NA		Island	0.00104914	0.0481929	0.000240352	0.0425083	0.000879657	0.0481929	0.000319982	0.0453925
cg16490692	33460474	20	GGT7	1stExon	Island	0.000396353	0.0371918	0.000240634	0.0425305	0.000401738	0.0371918	0.00022093	0.036439
cg25527090	118894180	10	VAX1	Body	Island	0.0021597	0.155399	0.000240826	0.0425305	0.00170123	0.155399	7.34437e-05	0.0181188
cg13928649	133540341	9	PRDM12	Body	Island	0.00109075	0.183659	0.000240843	0.0425305	0.000965423	0.183659	0.000490967	0.0582602
cg12565585	105235943	8	RIMS2	Body	Island	0.000632968	0.0293043	0.000241426	0.042612	0.000552047	0.0293043	0.000461296	0.0563075
cg02854288	61236911	3	FHIT	5'UTR	Island	0.00050812	0.0551921	0.000241757	0.0426352	0.000453305	0.0551921	0.000503394	0.0590544
cg00807959	48176281	1	NA		Island	0.000297891	0.030733	0.000241801	0.0426352	0.000263649	0.030733	0.000492351	0.0583329
cg18159860	72678420	5	NA		Island	0.00152423	0.224513	0.000241935	0.0426374	0.00122653	0.224513	0.000146673	0.0284739
cg18780257	192126023	3	FGF12	5'UTR	Island	0.00132739	0.0870179	0.000242258	0.0426679	0.00110032	0.0870179	0.000273607	0.0414889
cg00154357	147111280	3	ZIC4	Body	Island	0.00191445	0.338307	0.000242352	0.0426679	0.00155027	0.338307	0.000172388	0.0312324
cg20598560	223289176	2	SGPP2	TSS200	Island	0.000114534	0.0126623	0.000242648	0.0426986	0.000110589	0.0126623	0.000393331	0.0509431
cg13930892	2292000	11	ASCL2	1stExon	Island	0.00127683	0.0769574	0.000243087	0.0427542	0.00112701	0.0769574	0.000491128	0.0582602
cg07178006	20184718	11	NA		Island	0.00125135	0.209471	0.000243245	0.0427605	0.00108862	0.209471	0.000458598	0.0561138
cg26139133	24536765	3	THRB	TSS1500	Island	0.000466543	0.0344636	0.000243448	0.0427746	0.000434558	0.0344636	0.000490684	0.0582602
cg05842348	37133116	14	PAX9	Body	S_Shore	0.000975382	0.0675054	0.000243878	0.0428148	0.000909369	0.0675054	0.000490027	0.0582482
cg20513950	72463673	11	ARAP1	TSS1500	Island	0.000234265	0.0316006	0.000243921	0.0428148	0.00024961	0.0316006	7.71387e-05	0.0187007
cg10844844	39197502	6	KCNK5	TSS1500	Island	0.000737837	0.0715503	0.000244189	0.0428404	0.000737011	0.0715503	0.000277498	0.041807
cg13870102	33772519	1	NA		Island	0.00134707	0.212679	0.000244349	0.0428469	0.00116469	0.212679	0.000443058	0.054917
cg12122146	130388216	12	TMEM132D	TSS200	Island	0.00234186	0.135954	0.000244937	0.0429192	0.00180582	0.135954	2.8417e-05	0.00973654
cg13319286	62761500	10	RHOBTB1	TSS1500	Island	0.00103964	0.106763	0.000245007	0.0429192	0.000925105	0.106763	0.000507592	0.0593082
[truncated: 220 more rows]
