# Supplementary material for: DNA methylation perturbations may link altered development and aging in the lung
Source: Aging (Albany NY). 2021 Jan 19;13(2):1742–64. doi: 10.18632/aging.202544 (PMC7880367; doi:10.18632/aging.202544)
Supplement: Supplementary Table 3 [file aging-13-202544-s004.xlsx]

## Sheet: Sheet1
Supplementary Table 3. Fetal age-associated differentially methylated positions (DMPs) overlapping with adult lung tissue (244 CpGs at FDR<0.05, sorted by column J (FDR adjusted P-value for the overall fetal lung analysis). Column O: direction shows the direction of effect estimates in fetal lung and adult lung dataset respectively from overall analysis. Among CpGs with effect estimates in same d…
						Fetal Lung dataset overall analysis				Adult Lung dataset overall analysis					Fetal Lung dataset non-IUS-exposed only analysis					Fetal Lung dataset IUS-exposed only analysis					Adult Lung dataset subjects without COPD only analysis					Adult Lung dataset subjects with COPD only analysis
CG site	Chromosome	MAPINFO	Gene	UCSC_RefGene_Group	Relation_to_Island	Avebeta.FL	Regression-coefficient_FL	P.Value.FL	adj.P.Val.FL	AveBeta.ALT	Regression-coefficient_ALT	P.Value.ALT	adj.P.Val.ALT	Direction_overall_analysis	AveBeta.unexp	Regression-coefficient_unexp	P.Value_unexp	adj.P.Val_unexp	Direction of overall Fetal Lung to non-IUS exposed only analysis	AveBeta_exp	Regression-coefficient_exp	P.Value_exp	adj.P.Val_exp	Direction of overall Fetal Lung to IUS-exposed only analysis	AveBeta_cont	Regression-coefficient_cont	P.Value_cont	adj.P.Val_cont	Direction of overall Adult Lung tissue to non-COPD subjects only analysis	AveBeta_case	Regression-coefficient_case	P.Value_case	adj.P.Val_case	Direction of overall Adult Lung tissue to COPD case-only analysis
cg11375458	2	177003996	NA		N_Shore	0.162202	0.00313861	2.05566e-23	3.9546e-21	0.445858	0.00224196	0.000233286	0.0416542	++	0.173061	0.0031386	1.81693e-09	4.58566e-07	++	0.153057	0.00321944	1.39029e-12	1.37789e-10	++	0.45151	0.0011037	0.365758	0.832567	++	0.443639	0.00258716	0.000780205	0.0868049	++
cg12064276	13	79182205	NA		Island	0.130412	0.00210781	2.20667e-18	1.36856e-16	0.39689	0.0020846	1.55618e-06	0.0015335	++	0.139969	0.00243484	5.2274e-09	9.83424e-07	++	0.122365	0.00219387	1.96513e-10	8.66828e-09	++	0.39012	0.00100068	0.121024	0.706915	++	0.399548	0.00258256	1.49566e-05	0.0102392	++
cg22296612	6	15457699	JARID2	Body	OpenSea	0.917544	0.002286	7.88968e-17	3.60065e-15	0.990651	-0.000160718	4.80056e-05	0.0155366	+-	0.927144	0.00188163	1.54728e-05	0.000425729	++	0.90946	0.00262224	1.01306e-10	4.9368e-09	++	0.990818	-3.50902e-05	0.588298	0.908535	--	0.990586	-0.000257448	2.67469e-06	0.00324888	--
cg07758738	18	12911528	NA		Island	0.213641	0.00287896	3.99962e-15	1.32646e-13	0.456434	0.00211389	6.95785e-05	0.0196611	++	0.222013	0.00273984	7.93551e-05	0.00155582	++	0.20659	0.00303934	6.5448e-10	2.40807e-08	++	0.449545	0.00130773	0.187612	0.748661	++	0.459139	0.0028276	4.61688e-05	0.0201795	++
cg17110767	1	243637966	SDCCAG8	Body	Island	0.67171	0.00295741	1.40877e-14	4.23946e-13	0.973236	0.000549447	4.13227e-05	0.0141169	++	0.681586	0.00301201	7.09184e-06	0.000230044	++	0.663393	0.00312582	1.96844e-08	4.59898e-07	++	0.976724	0.000458326	0.0712751	0.669934	++	0.971867	0.000514015	0.00289577	0.152415	++
cg20801476	7	27281465	EVX1	TSS1500	N_Shore	0.0587471	0.000991789	1.78343e-14	5.27428e-13	0.239064	0.00138142	0.000290662	0.0476705	++	0.0590315	0.000839951	0.000205717	0.00330171	++	0.0585077	0.00104464	1.56605e-08	3.765e-07	++	0.232045	0.000797478	0.191899	0.751217	++	0.241819	0.00148535	0.00442379	0.180582	++
cg11687036	3	147139563	NA		Island	0.0351458	0.000462747	8.14368e-14	2.15795e-12	0.318907	0.00176707	0.000122338	0.0283799	++	0.0364317	0.000482736	2.18761e-05	0.000559768	++	0.034063	0.000427712	7.32619e-08	1.44448e-06	++	0.31274	0.00208763	0.00556497	0.518731	++	0.321328	0.00147166	0.0207646	0.316581	++
cg20580088	14	62161583	HIF1A	TSS1500;TSS1500	N_Shore	0.131788	0.00133359	8.62126e-14	2.27535e-12	0.281914	0.00166684	3.41888e-05	0.0124715	++	0.131625	0.00156999	1.48765e-06	6.84468e-05	++	0.131925	0.00121844	1.21658e-06	1.71247e-05	++	0.288038	0.000573987	0.438724	0.860158	++	0.27951	0.00281707	3.80408e-08	0.000168451	++
cg17611674	10	8094431	FLJ45983	Body;Body	Island	0.10002	0.00105374	8.86483e-14	2.33557e-12	0.378564	0.00221467	7.25356e-05	0.0202674	++	0.105457	0.00107532	5.27538e-06	0.000182347	++	0.0954419	0.00110437	2.36709e-07	4.04497e-06	++	0.380848	0.00103506	0.323014	0.814276	++	0.377668	0.00313374	1.65523e-05	0.010803	++
cg16584406	6	137811110	NA		S_Shore	0.216732	0.00213722	1.25899e-13	3.22956e-12	0.570762	0.00255883	0.000153547	0.0325284	++	0.22352	0.00192815	0.000260379	0.00399107	++	0.211015	0.0022957	7.40044e-10	2.67333e-08	++	0.560103	0.00280904	0.00948015	0.549072	++	0.574946	0.00250204	0.00779106	0.224248	++
cg04427498	7	20830657	NA		Island	0.0337637	0.000454152	2.23604e-13	5.50742e-12	0.52452	0.00223319	0.000206081	0.0387802	++	0.0358984	0.00050355	1.6374e-07	1.27972e-05	++	0.0319661	0.000388734	4.27503e-06	5.2033e-05	++	0.527496	0.00161678	0.166609	0.736832	++	0.523351	0.00250157	0.00125501	0.107739	++
cg24388061	8	141249678	TRAPPC9	Body;Body	OpenSea	0.728712	0.0015882	3.27285e-13	7.81857e-12	0.937723	0.000944402	1.79253e-05	0.00822931	++	0.731672	0.00142944	0.000125235	0.00223598	++	0.72622	0.00166787	1.90834e-07	3.34163e-06	++	0.9389	0.00014185	0.676761	0.933224	++	0.937261	0.00123376	3.63116e-05	0.0174488	++
cg21595709	19	15344186	EPHX3	TSS1500;TSS1500	Island	0.0455731	0.000634011	1.34757e-12	2.90301e-11	0.208724	0.00127676	0.000208527	0.0390723	++	0.0472981	0.000580011	0.000760107	0.00933743	++	0.0441204	0.000662275	3.40624e-08	7.42304e-07	++	0.194909	0.0011309	0.0442123	0.639104	++	0.214147	0.00159795	0.000774276	0.0866267	++
cg17592231	11	43604758	NA		S_Shore	0.129729	0.00117951	1.56327e-12	3.33539e-11	0.459421	0.0021528	2.11072e-06	0.00182768	++	0.133847	0.0010787	7.2003e-05	0.00143839	++	0.12626	0.00115416	2.01026e-06	2.67043e-05	++	0.45052	0.00171489	0.0162665	0.587213	++	0.462914	0.002156	0.000525813	0.0726594	++
cg24435879	7	155166205	NA		Island	0.0412679	0.000425061	2.03629e-12	4.26594e-11	0.0980469	0.00113161	0.000104908	0.025754	++	0.0419502	0.000417473	0.000263673	0.00402903	++	0.0406933	0.000423677	9.90537e-08	1.87917e-06	++	0.10201	0.00100253	0.0554421	0.652818	++	0.0964911	0.00121995	0.00164149	0.121149	++
cg00484358	1	110610995	ALX3	Body	Island	0.122574	0.000959062	5.44895e-12	1.06609e-10	0.384525	0.00119898	0.000210948	0.0393574	++	0.127611	0.0011046	7.50607e-06	0.000240422	++	0.118333	0.000881648	9.41036e-06	0.000104496	++	0.3851	0.000516669	0.320575	0.813342	++	0.384299	0.00140144	0.00150105	0.116397	++
cg18159860	5	72678420	NA		Island	0.105766	0.00182293	1.27538e-11	2.349e-10	0.224513	0.00152423	0.000241935	0.0426374	++	0.108132	0.00176052	6.92105e-05	0.0013957	++	0.103774	0.00176358	5.26142e-06	6.2642e-05	++	0.208158	0.00188051	0.00478345	0.506254	++	0.230932	0.00137385	0.0183623	0.304379	++
cg27583307	2	200320750	SATB2	Body	Island	0.0276191	0.000280264	1.2776e-11	2.35248e-10	0.105393	0.00131746	0.000304725	0.0489668	++	0.0287065	0.000279027	0.000619453	0.00792823	++	0.0267033	0.000268735	5.88843e-07	9.03686e-06	++	0.101978	0.000147464	0.81596	0.966107	++	0.106734	0.00221679	5.79618e-06	0.00555151	++
cg17033854	17	37758493	NA		N_Shelf	0.188455	0.00160711	1.61636e-11	2.92762e-10	0.452885	0.00171911	0.000218209	0.0401353	++	0.190581	0.00150894	0.00062395	0.00796944	++	0.186665	0.00165028	7.05724e-07	1.05978e-05	++	0.448341	0.00156424	0.068355	0.666932	++	0.454668	0.00150881	0.0128863	0.269471	++
cg09477019	16	56681945	NA		OpenSea	0.0876495	0.00172019	2.06301e-11	3.67734e-10	0.590395	0.00215301	8.30297e-05	0.0220724	++	0.0957761	0.0018436	0.00147426	0.0157273	++	0.080806	0.00178684	6.67671e-10	2.44835e-08	++	0.598356	0.00082038	0.375983	0.836996	++	0.587271	0.00242044	0.00064232	0.0792314	++
cg03470772	4	85503328	CDS1	TSS1500	N_Shore	0.0338811	0.000376571	2.5521e-11	4.48193e-10	0.258282	0.00242466	0.000119506	0.0280515	++	0.0341838	0.000256684	0.00536353	0.0429222	++	0.0336261	0.00038895	1.22276e-06	1.72041e-05	++	0.249949	0.00115018	0.265565	0.787704	++	0.261553	0.00303797	0.000332625	0.0588276	++
cg01332342	2	70350820	NA		N_Shore	0.313476	0.00149479	3.36825e-11	5.80549e-10	0.671182	0.00205407	0.000295232	0.0480966	++	0.319682	0.00177552	9.21643e-06	0.00028306	++	0.30825	0.0012279	8.00681e-05	0.000693462	++	0.683085	0.00194006	0.0480649	0.64328	++	0.666509	0.00216526	0.00466018	0.184442	++
cg20992114	4	111542825	PITX2	Body;Body;Body	Island	0.0785706	0.000687251	4.75409e-11	7.98454e-10	0.278659	0.00142484	2.4933e-06	0.00209668	++	0.0813654	0.000682358	0.000177749	0.00294608	++	0.076217	0.000727896	3.60045e-06	4.46833e-05	++	0.274179	0.000918176	0.0627421	0.660108	++	0.280417	0.0016051	0.000100305	0.0316692	++
cg07247419	20	21376484	NKX2-4	3'UTR	Island	0.0246785	0.000301751	9.05827e-11	1.45483e-09	0.235081	0.0016208	1.33095e-05	0.00688756	++	0.0257263	0.000289456	0.000593778	0.00766392	++	0.0237961	0.00033737	9.8817e-07	1.42366e-05	++	0.236326	0.00143766	0.0460773	0.641107	++	0.234592	0.00193596	4.21423e-05	0.018998	++
cg22197050	2	63276183	LOC100132215	TSS1500	Island	0.0322553	0.000440561	4.01581e-10	5.83247e-09	0.267038	0.00203104	5.03961e-08	0.000110187	++	0.0359977	0.000370078	0.00806839	0.0586491	++	0.0291039	0.000428885	9.16044e-08	1.75577e-06	++	0.261503	0.0019337	0.00459775	0.50441	++	0.269211	0.00228104	4.18282e-06	0.00442072	++
cg04223553	5	153852934	NA		N_Shore	0.0264421	0.000292139	6.30011e-10	8.87633e-09	0.342504	0.00225341	6.30068e-05	0.0183068	++	0.0279179	0.000322569	0.000137628	0.00240778	++	0.0251993	0.000295685	9.44656e-06	0.000104855	++	0.331999	0.00244046	0.00427194	0.499857	++	0.346627	0.00181548	0.0206838	0.316208	++
cg06306198	3	147128998	ZIC1	Body	Island	0.050338	0.000520795	1.29166e-09	1.7343e-08	0.226183	0.00121813	0.000235909	0.0419771	++	0.0536973	0.000606635	0.000560242	0.00731621	++	0.0475092	0.000488433	1.57056e-05	0.000164232	++	0.222847	0.00096127	0.0856548	0.681863	++	0.227493	0.00134286	0.00278546	0.150246	++
cg11814235	18	28621490	DSC3	Body;Body	Island	0.021745	0.000238781	1.47983e-09	1.9691e-08	0.124608	0.00135113	0.000138931	0.030625	++	0.0231618	0.000269018	0.00297117	0.0271626	++	0.0205519	0.000212667	5.38526e-07	8.35161e-06	++	0.116615	0.00107455	0.0762266	0.673963	++	0.127746	0.0015332	0.00113421	0.102888	++
cg00302494	2	237080354	NA		Island	0.0375934	0.000262878	2.27786e-09	2.94352e-08	0.193548	0.00117251	3.15284e-05	0.0119755	++	0.0382576	0.000236837	0.00187521	0.0190044	++	0.037034	0.000250291	2.83598e-05	0.000277354	++	0.189379	0.000752392	0.196665	0.753712	++	0.195184	0.00158425	6.43649e-06	0.00586368	++
cg10189962	2	175192878	NA		N_Shore	0.0531505	0.000703641	2.29766e-09	2.96779e-08	0.362387	0.0017395	0.000305654	0.0490261	++	0.0542278	0.000393931	0.0218803	0.122408	++	0.0522434	0.000862581	1.77783e-06	2.39371e-05	++	0.355765	0.00131142	0.112966	0.70241	++	0.364987	0.00182987	0.00431618	0.17909	++
cg14614094	9	133567903	EXOSC2	TSS1500	N_Shore	0.355529	0.00120115	2.99182e-09	3.79661e-08	0.693274	0.00179786	4.36824e-05	0.0145939	++	0.362049	0.00112501	0.00115064	0.0129254	++	0.350039	0.00133599	3.63387e-06	4.50501e-05	++	0.686028	0.00162809	0.0176177	0.590424	++	0.696118	0.00169796	0.00567855	0.198612	++
cg15110296	12	12509705	LOH12CR1	TSS1500;Body	N_Shore	0.682965	-0.00188965	4.37625e-09	5.4098e-08	0.256594	-0.00314487	0.000234316	0.0417581	--	0.674636	-0.00192921	0.0019476	0.0195832	--	0.689978	-0.00200763	9.26158e-06	0.000103037	--	0.271568	-0.00392956	0.00962543	0.551129	--	0.250716	-0.00248928	0.0266078	0.345702	--
cg07851675	5	2755540	NA		Island	0.025723	0.000313947	9.26298e-09	1.08724e-07	0.170819	0.00229586	3.00602e-07	0.000443537	++	0.0268451	0.000232427	0.00275157	0.0255575	++	0.0247781	0.000333232	1.00075e-06	1.44012e-05	++	0.164622	0.00196967	0.00309167	0.485774	++	0.173251	0.00252868	5.11673e-05	0.0212496	++
cg02532538	17	33787739	NA		Island	0.0609565	0.00126014	1.06688e-08	1.23984e-07	0.0897066	0.00136683	0.000108946	0.0263935	++	0.0711424	0.00153108	0.00061994	0.00793273	++	0.0523788	0.0010398	8.40328e-05	0.000723353	++	0.0837979	0.000541216	0.3801	0.83882	++	0.0920259	0.0020239	1.84294e-05	0.0114848	++
cg18431640	13	100637191	ZIC2	Body	Island	0.0322817	0.000324206	1.26469e-08	1.45256e-07	0.187589	0.00131797	1.66326e-05	0.00781371	++	0.0342633	0.000268496	0.0183693	0.107935	++	0.030613	0.000315208	8.83256e-06	9.88088e-05	++	0.187275	0.00118356	0.0416364	0.636031	++	0.187713	0.00139847	0.000391429	0.0636302	++
cg24719321	11	122850490	BSX	Body	N_Shore	0.016294	0.000122954	1.33807e-08	1.53141e-07	0.177921	0.00203544	2.3802e-06	0.00202117	++	0.017071	0.000103611	0.00739192	0.0548817	++	0.0156398	0.00014036	7.96968e-06	9.03361e-05	++	0.165907	0.00136992	0.0406765	0.634861	++	0.182637	0.00228778	0.000134875	0.0371809	++
cg08376141	6	32116591	PRRT1	3'UTR	Island	0.113178	0.00112126	1.88982e-08	2.10852e-07	0.527279	0.0027247	4.16239e-06	0.00309811	++	0.116825	0.00137711	0.000219738	0.0034788	++	0.110106	0.00112016	7.23658e-05	0.000634095	++	0.52102	0.000918388	0.364248	0.831926	++	0.529735	0.00383968	1.5506e-06	0.00230826	++
cg19284211	20	20347495	INSM1	TSS1500	Island	0.0398514	0.000511512	2.04256e-08	2.2672e-07	0.208781	0.00168853	5.15798e-05	0.016212	++	0.0426362	0.000660791	0.00112353	0.0126915	++	0.0375062	0.000394055	5.3872e-05	0.000489123	++	0.198658	0.00205667	0.00700013	0.534228	++	0.212755	0.00138968	0.0116759	0.259542	++
cg12192112	5	95469201	NA		OpenSea	0.684021	-0.00148427	2.61023e-08	2.85164e-07	0.833716	0.00269286	0.000225129	0.0408697	-+	0.679311	-0.00165695	0.000373934	0.00531558	--	0.687986	-0.00140987	3.40488e-05	0.00032609	--	0.834441	0.00344573	0.00625542	0.526959	++	0.833431	0.00223901	0.0254851	0.340099	++
cg18944010	1	119522855	TBX15	5'UTR	S_Shore	0.0250321	0.000226726	4.89842e-08	5.12346e-07	0.181735	0.00147518	0.000155229	0.0327521	++	0.0261364	0.000253072	0.00252962	0.0239281	++	0.0241021	0.000237305	1.1034e-05	0.00012033	++	0.177481	0.00171637	0.00386247	0.498978	++	0.183405	0.000959076	0.0709264	0.479302	++
cg06634716	1	217311151	ESRRG	TSS200	Island	0.0548549	0.000943804	5.19071e-08	5.40684e-07	0.213506	0.00182635	0.000126828	0.0289296	++	0.0569346	0.000797189	0.0187687	0.109637	++	0.0531035	0.00095276	1.95278e-05	0.000199146	++	0.199023	0.00196267	0.0202106	0.598031	++	0.219191	0.0020289	0.00125837	0.107821	++
cg09834794	3	147087702	NA		OpenSea	0.0154995	9.29767e-05	7.79621e-08	7.90473e-07	0.178484	0.00161857	0.00022942	0.041391	++	0.0158433	0.000113873	0.00171372	0.0177234	++	0.0152099	8.85775e-05	0.000226201	0.00173263	++	0.178072	0.00141121	0.058528	0.655762	++	0.178645	0.00128521	0.026799	0.346606	++
cg00252781	1	179334658	C1orf125	TSS1500;TSS200	N_Shore	0.362189	-0.00174357	9.34195e-08	9.35874e-07	0.218456	0.00211268	7.11199e-06	0.00450949	-+	0.360864	-0.001538	0.00228981	0.0221515	--	0.363305	-0.001603	0.000913275	0.00590967	--	0.223098	0.0013697	0.0587575	0.656049	++	0.216635	0.00265765	6.32282e-05	0.0242001	++
cg27523527	1	91196145	NA		S_Shelf	0.0441916	0.000304416	9.51762e-08	9.52348e-07	0.356934	0.00305457	4.99263e-05	0.0159067	++	0.0449988	0.000342481	0.000504738	0.00674881	++	0.0435118	0.000262535	0.000810755	0.00532259	++	0.375731	0.00193848	0.186332	0.747418	++	0.349556	0.00357891	0.000221064	0.0476663	++
cg05700079	3	147126961	ZIC1	TSS1500	N_Shore	0.0150126	0.000104694	1.09129e-07	1.08236e-06	0.304686	0.00181302	1.36022e-05	0.00698736	++	0.0155547	0.000134284	0.000405155	0.00566533	++	0.0145561	8.28353e-05	0.00232167	0.0132948	++	0.310558	0.001843	0.00104549	0.405034	++	0.302382	0.00145788	0.0150317	0.284826	++
cg11706983	7	27233454	NA		S_Shore	0.0303255	0.000288606	1.56901e-07	1.51908e-06	0.221793	0.0024941	0.000102029	0.0253138	++	0.0306718	0.00026108	0.00276904	0.0256851	++	0.0300338	0.000262109	0.000687105	0.00460781	++	0.211561	0.00140543	0.10633	0.698308	++	0.225809	0.00326741	0.00046112	0.0684435	++
cg07129924	7	155261402	NA		Island	0.025333	0.000173609	1.74312e-07	1.67648e-06	0.226776	0.00197602	3.02976e-07	0.000443537	++	0.0261723	0.000149518	0.0267602	0.140838	++	0.0246262	0.000151349	0.000100011	0.000845168	++	0.22501	0.002239	0.00124239	0.418023	++	0.22747	0.00171976	0.000637989	0.0790667	++
cg03523785	14	29234981	FOXG1	TSS1500	Island	0.0339204	0.000427951	2.33333e-07	2.20242e-06	0.246634	0.00150711	0.000103192	0.0254963	++	0.034875	0.000407187	0.0015696	0.0165345	++	0.0331166	0.000396773	0.00127431	0.00790643	++	0.2467	0.000377379	0.604859	0.913533	++	0.246608	0.00218221	1.22539e-05	0.00883865	++
cg14535884	9	117349621	ATP6V1G1	TSS1500	N_Shore	0.40925	-0.00289807	3.88885e-07	3.53661e-06	0.136146	0.00216854	0.000219735	0.0402483	-+	0.379936	-0.00272095	0.00162646	0.0170088	--	0.433937	-0.00304725	0.000255694	0.00193054	--	0.134418	0.00244489	0.034544	0.625618	++	0.136824	0.00197711	0.0082108	0.229007	++
cg08889797	3	147106489	ZIC4	3'UTR;Body;3'UTR;Body;3'UTR	N_Shelf	0.029016	0.000179351	4.15573e-07	3.76111e-06	0.112708	0.00111455	0.000116537	0.0276017	++	0.0294223	0.000234306	5.01679e-05	0.00107988	++	0.0286737	0.000116555	0.0138591	0.0608296	++	0.107379	0.000806103	0.0559563	0.653156	++	0.114799	0.00156611	9.44351e-05	0.0305625	++
cg08088161	19	55791950	HSPBP1	TSS200;TSS200	S_Shore	0.0770938	0.000822942	6.4008e-07	5.61946e-06	0.335847	0.00163237	0.000293768	0.0479103	++	0.0803896	0.000648807	0.0409339	0.189593	++	0.0743185	0.000984371	2.08558e-05	0.000211081	++	0.338411	0.001218	0.130649	0.714439	++	0.334841	0.00203213	0.000641569	0.0791946	++
cg01302656	14	29254853	C14orf23	Body	Island	0.0361644	0.000218141	1.06605e-06	9.02573e-06	0.249484	0.00181042	0.000120758	0.0281817	++	0.0375416	0.000316611	0.000140709	0.00245039	++	0.0350048	0.00021151	0.00076799	0.00507637	++	0.237683	0.00170245	0.0193419	0.595782	++	0.254116	0.00150243	0.0198963	0.312867	++
cg12298222	15	40799212	NA		N_Shore	0.0433936	-0.000320862	1.22477e-06	1.02742e-05	0.103959	0.00121477	0.00029546	0.0480966	-+	0.0403517	-0.00041513	0.00078497	0.00958555	--	0.0459551	-0.000294141	0.00164152	0.0098589	--	0.103677	0.00112992	0.0471934	0.641919	++	0.10407	0.00147718	0.00145885	0.115202	++
cg15715853	3	150916446	GPR171	Body;Body	OpenSea	0.687035	-0.000974446	1.22794e-06	1.02993e-05	0.830685	0.00252738	8.90402e-05	0.0231072	-+	0.68496	-0.000909832	0.00325589	0.0291597	--	0.688782	-0.00100865	0.00160138	0.00964937	--	0.833189	0.00104333	0.23674	0.774098	++	0.829701	0.00333294	0.000233671	0.0486861	++
cg05024939	4	113442251	NA		N_Shore	0.0272299	0.000183416	1.25855e-06	1.05368e-05	0.262392	0.00240027	3.35117e-14	2.34465e-09	++	0.0288118	0.000146444	0.0269073	0.141405	++	0.0258977	0.000204339	9.75529e-05	0.000826677	++	0.257795	0.00216503	0.000166971	0.277433	++	0.264196	0.00232442	1.20657e-08	8.27627e-05	++
cg19496158	5	3489600	NA		OpenSea	0.737249	-0.000856078	1.78379e-06	1.45748e-05	0.90476	0.00171555	2.106e-05	0.00920199	-+	0.732313	-0.000652785	0.0820107	0.299628	--	0.741406	-0.00101629	1.81426e-06	2.43712e-05	--	0.899859	0.00190878	0.00464265	0.50441	++	0.906684	0.00174232	0.00141381	0.113746	++
cg00425710	16	56672671	MT1A	1stExon	S_Shore	0.559113	0.0015839	2.05938e-06	1.66626e-05	0.855083	0.00169127	0.000186705	0.0367897	++	0.567611	0.00163547	0.0186462	0.10912	++	0.551956	0.00165729	7.33876e-05	0.00064176	++	0.853624	0.000753517	0.380001	0.838787	++	0.855655	0.00182684	0.00116486	0.104299	++
cg24975834	13	112720171	NA		N_Shore	0.0347886	0.000238736	2.26942e-06	1.82206e-05	0.0838468	0.000860207	0.000163215	0.0337451	++	0.0349702	0.000356848	0.000106457	0.00196832	++	0.0346357	0.000184887	0.00501188	0.0257379	++	0.0823645	0.00107168	0.00686954	0.534126	++	0.0844286	0.00072379	0.0174276	0.298999	++
cg07440775	10	26507383	GAD2	Body;Body	Island	0.0503489	0.000519639	2.62995e-06	2.08986e-05	0.238295	0.0018931	7.53111e-05	0.0207774	++	0.0520397	0.000489662	0.00438	0.0366661	++	0.0489251	0.000521216	0.00184758	0.0109176	++	0.231442	0.00168917	0.0281917	0.613346	++	0.240985	0.00119946	0.0539483	0.438142	++
cg26726141	17	64612159	PRKCA	Body	OpenSea	0.959248	0.000546272	2.64961e-06	2.10443e-05	0.967592	-0.00127622	0.000144991	0.0315029	+-	0.959151	0.000334949	0.114871	0.368625	++	0.959329	0.000583686	6.23788e-05	0.000555871	++	0.970698	-0.000531258	0.144179	0.722878	--	0.966373	-0.00187536	0.000213363	0.0470024	--
cg17303833	10	97889448	ZNF518A	TSS200	N_Shore	0.110375	0.000750577	3.53491e-06	2.74975e-05	0.293635	0.00164018	4.90867e-05	0.0157395	++	0.115662	0.000611619	0.0320702	0.160012	++	0.105922	0.000801859	0.000432454	0.0030665	++	0.298919	0.0010393	0.122546	0.708031	++	0.29156	0.00163949	0.00200621	0.131556	++
cg06470822	6	28175283	NA		Island	0.0142815	8.54695e-05	3.71928e-06	2.88155e-05	0.0890137	0.0012891	3.40595e-05	0.0124413	++	0.0143791	0.000121171	0.00161278	0.0168895	++	0.0141994	7.58978e-05	0.00306187	0.0168682	++	0.0876046	0.000966231	0.0311695	0.61987	++	0.0895669	0.00138266	0.001485	0.115908	++
cg11220950	16	2042693	SYNGR3	Body	Island	0.175727	0.000857588	3.86293e-06	2.98563e-05	0.442496	0.00135601	0.000306165	0.0490406	++	0.175187	0.00108631	0.00100614	0.0116353	++	0.176183	0.000857448	0.00103223	0.00658065	++	0.436756	0.0015807	0.00747096	0.54032	++	0.444749	0.00112891	0.0305942	0.362149	++
cg05194810	2	172950397	DLX1	5'UTR;1stExon;1stExon;5'UTR	N_Shore	0.0292041	0.000204864	4.31718e-06	3.30973e-05	0.112667	0.00125197	2.73991e-05	0.0109292	++	0.0278402	0.000169883	0.0142524	0.0895624	++	0.0303526	0.000223995	0.000407811	0.00291119	++	0.116049	0.00164167	0.00420924	0.499857	++	0.11134	0.00103311	0.00828576	0.229699	++
cg20959460	5	77253544	NA		N_Shore	0.124214	0.00134918	4.4982e-06	3.43806e-05	0.362173	0.00202136	0.000238692	0.0422788	++	0.134065	0.00157022	0.0132968	0.0851586	++	0.115919	0.00118427	0.000824694	0.00540363	++	0.367253	0.00115623	0.203549	0.757273	++	0.360179	0.00213512	0.00384524	0.170908	++
cg20467957	11	31845529	NA		N_Shore	0.0716998	0.00073815	4.73609e-06	3.60608e-05	0.24659	0.00151075	8.17284e-05	0.0219231	++	0.0741616	0.000939519	0.00268785	0.0250953	++	0.0696266	0.000709732	0.000441863	0.00312516	++	0.234901	0.0014488	0.0258511	0.608927	++	0.251178	0.0015949	0.0024241	0.142284	++
cg01357116	4	94749496	ATOH1	TSS1500	Island	0.0263742	0.000216471	5.08875e-06	3.85468e-05	0.0694722	0.000860844	0.000128755	0.0290591	++	0.0268626	0.000219602	0.0132479	0.0849217	++	0.0259629	0.000214486	0.00153844	0.00931672	++	0.0641581	0.000600329	0.0573664	0.654979	++	0.0715582	0.000978237	0.0019562	0.130514	++
cg05419198	8	145753896	MGC70857	Body;TSS1500	Island	0.0652695	0.000592983	5.83368e-06	4.3756e-05	0.217092	0.00173523	0.000219418	0.0402483	++	0.0676704	0.000476852	0.0734054	0.279103	++	0.0632477	0.000583388	0.000254583	0.00192302	++	0.198252	0.00123116	0.0476664	0.642454	++	0.224488	0.00192621	0.00498338	0.189135	++
cg22469804	3	171131904	TNIK	Body;Body;Body;Body;Body;Body;Body;Body;Body	OpenSea	0.917998	0.000664785	6.27792e-06	4.68487e-05	0.977025	-0.000396419	6.47404e-05	0.0185775	+-	0.921907	0.000765269	0.000410114	0.00571958	++	0.914707	0.000761327	0.000517173	0.00358964	++	0.974573	-0.000789876	0.000234153	0.326992	--	0.977987	-0.000247367	0.034695	0.378082	--
cg07079219	11	59323318	NA		OpenSea	0.0317474	0.000218091	7.28691e-06	5.38218e-05	0.168561	0.0012214	0.000205853	0.0387583	++	0.0338132	0.000255864	0.00789695	0.0576885	++	0.0300078	0.000201352	0.00228672	0.0131194	++	0.170998	0.000996334	0.0934832	0.688661	++	0.167605	0.00134489	0.00237426	0.140961	++
cg08715231	8	25906064	NA		S_Shore	0.0516925	0.000386191	7.94963e-06	5.83725e-05	0.294213	0.00147578	5.27513e-05	0.0164034	++	0.051386	0.00036363	0.0271982	0.142509	++	0.0519507	0.000421789	0.0003752	0.00270494	++	0.294374	0.000799108	0.291088	0.799355	++	0.29415	0.00181236	3.74729e-05	0.0178111	++
cg05676400	4	174443865	NA		Island	0.0203967	0.00011643	8.26367e-06	6.0508e-05	0.135869	0.00131441	0.000106836	0.0260629	++	0.021554	0.000109574	0.0299793	0.152573	++	0.0194221	9.8243e-05	0.000644007	0.00435439	++	0.132836	0.00110665	0.0644759	0.662559	++	0.137059	0.00158514	0.00052714	0.0727158	++
cg03431972	5	153857918	HAND1	TSS200	Island	0.0271754	0.000153213	8.40874e-06	6.14851e-05	0.131607	0.00143208	1.30519e-05	0.00679348	++	0.0280959	0.000207636	0.00161635	0.0169187	++	0.0264002	0.000119819	0.00858445	0.040721	++	0.120351	0.00128721	0.00795307	0.541635	++	0.136025	0.00158107	0.000701633	0.0825873	++
cg09492887	7	103085978	SLC26A5	5'UTR;5'UTR;5'UTR;5'UTR;5'UTR	Island	0.0249824	0.000144858	8.71979e-06	6.35892e-05	0.0734578	0.00103608	1.31379e-05	0.00680888	++	0.0259062	0.000141842	0.0253816	0.135712	++	0.0242045	0.000169234	4.15716e-05	0.000388738	++	0.0705765	0.00111942	0.00320659	0.486297	++	0.0745888	0.000776416	0.0159888	0.290355	++
cg02799448	6	137817008	OLIG3	TSS1500	Island	0.0233034	0.000174638	1.02815e-05	7.40657e-05	0.0698259	0.000630665	4.33941e-05	0.0145267	++	0.0250906	0.00020158	0.015209	0.094018	++	0.0217983	0.000166559	0.00124773	0.0077652	++	0.0723135	0.000873362	0.00499594	0.510782	++	0.0688495	0.000349597	0.0662446	0.468786	++
cg05009601	7	121944500	FEZF1	1stExon;1stExon;5'UTR;5'UTR	Island	0.0188086	0.000120945	1.23474e-05	8.77434e-05	0.247088	0.00235299	1.79445e-06	0.00167846	++	0.0197848	-1.45346e-06	0.977915	0.993236	+-	0.0179866	0.000175991	1.84474e-06	2.47368e-05	++	0.237437	0.00238686	0.00242664	0.468189	++	0.250876	0.00206843	0.00166927	0.122038	++
cg22088594	13	37634133	FAM48A	TSS1500;TSS1500	S_Shore	0.095145	-0.00105124	1.44026e-05	0.000101205	0.176589	0.0021572	2.08296e-06	0.00182625	-+	0.0953936	-0.000264708	0.552836	0.814262	--	0.0949357	-0.00143221	2.47995e-05	0.000246181	--	0.181326	0.0014164	0.0709669	0.669528	++	0.17473	0.00231835	0.000109754	0.033329	++
cg12757011	2	162281111	TBR1	3'UTR	S_Shore	0.051806	0.000314338	1.58052e-05	0.000110289	0.411369	0.00262244	6.3196e-12	8.64802e-08	++	0.0536539	0.000126543	0.392578	0.705447	++	0.0502498	0.000386001	1.42825e-06	1.97499e-05	++	0.4132	0.00196263	0.00134316	0.424998	++	0.41065	0.00281869	1.86054e-08	0.000106699	++
cg00741624	14	93897389	KIAA1409	5'UTR	Island	0.0319031	0.000214583	1.66189e-05	0.000115568	0.241031	0.00174309	0.000162304	0.0336369	++	0.0342235	0.000286561	0.00491831	0.0400914	++	0.0299492	0.000191108	0.000837331	0.00547729	++	0.226958	0.00184745	0.0133009	0.574993	++	0.246555	0.00173381	0.00649045	0.209265	++
cg11260097	7	121940647	NA		Island	0.0273831	0.000159892	1.75765e-05	0.000121723	0.2129	0.00177974	4.96323e-05	0.0158418	++	0.0295799	0.000208341	0.0116246	0.0771403	++	0.0255332	0.000164097	0.000145056	0.00117102	++	0.195841	0.00192238	0.00338862	0.488548	++	0.219597	0.0017021	0.00589368	0.201218	++
cg04106092	16	47760096	NA		OpenSea	0.613971	-0.00115412	1.83514e-05	0.000126643	0.61966	0.00243398	8.09982e-05	0.0217964	-+	0.619294	-0.00162295	0.00217889	0.0213229	--	0.609489	-0.000918711	0.00312723	0.0171811	--	0.626564	0.00173857	0.0432118	0.638137	++	0.61695	0.00264202	0.00267739	0.148129	++
cg01080998	5	87981177	LOC645323	TSS1500	Island	0.0473934	0.000218843	2.03471e-05	0.000139355	0.160131	0.00105422	7.54094e-05	0.0207882	++	0.0494209	0.000126174	0.200956	0.506478	++	0.0456861	0.000213539	0.00163524	0.00982695	++	0.152831	0.00150728	0.000872668	0.393512	++	0.162997	0.000861166	0.0189115	0.307779	++
cg07974473	14	29235092	FOXG1	TSS1500	Island	0.0375519	0.000202894	2.09731e-05	0.000143331	0.141341	0.000890515	0.000113673	0.0271253	++	0.0403006	0.000200457	0.0512023	0.220581	++	0.0352372	0.000185901	0.000884274	0.0057435	++	0.143456	0.000763186	0.124442	0.709677	++	0.140511	0.000996401	0.000426442	0.0657798	++
cg14894848	22	48884945	FAM19A5	TSS1500	Island	0.073409	0.000686547	2.2507e-05	0.000153029	0.27047	0.00247723	1.07285e-05	0.0058586	++	0.0767665	0.000573699	0.0105575	0.0717974	++	0.0705817	0.000887892	0.000628115	0.00426013	++	0.269437	0.00285741	0.00054452	0.372581	++	0.270875	0.00216576	0.00590649	0.201327	++
cg02571816	19	38747378	PPP1R14A	TSS1500	Island	0.0187973	9.78961e-05	2.67121e-05	0.000179269	0.109956	0.00218912	1.94799e-06	0.00174733	++	0.01886	4.37275e-05	0.26127	0.581576	++	0.0187445	0.000129743	0.000192853	0.00150563	++	0.102293	0.00129179	0.0426467	0.637571	++	0.112964	0.00237739	0.00019012	0.0444837	++
cg03876032	10	26501065	MYO3A	3'UTR	Island	0.0772985	0.000683257	3.06513e-05	0.000203619	0.22561	0.00196599	0.000233509	0.041656	++	0.0789978	0.000214992	0.46855	0.761435	++	0.0758676	0.000935651	4.09288e-05	0.000383558	++	0.217567	0.00203251	0.0100859	0.554714	++	0.228767	0.00222002	0.00330805	0.161086	++
cg18708460	6	100051339	NA		Island	0.0520092	0.000299093	3.11672e-05	0.00020678	0.206031	0.00113676	7.33062e-06	0.00460403	++	0.0543775	0.000253265	0.0621654	0.250667	++	0.0500149	0.000268611	0.0026311	0.0148099	++	0.203244	0.0014206	0.00430283	0.499857	++	0.207125	0.00114352	0.000429494	0.0660629	++
cg05938001	2	172952948	DLX1	Body;3'UTR	Island	0.0463517	0.000440896	3.34853e-05	0.000220797	0.212181	0.00126074	0.000245987	0.0430694	++	0.0503443	0.000539025	0.0313286	0.157389	++	0.0429895	0.000418959	0.000359696	0.00260622	++	0.208223	0.000735246	0.198137	0.754731	++	0.213735	0.00179594	0.000146631	0.0390357	++
cg08534628	13	100650073	NA		Island	0.175967	0.000971729	3.39545e-05	0.000223629	0.353418	0.00209643	1.91227e-08	5.18575e-05	++	0.187358	0.000929437	0.0906984	0.319119	++	0.166375	0.00107238	3.29465e-05	0.000316636	++	0.343769	0.00281321	2.30131e-05	0.148425	++	0.357205	0.00176199	0.000367697	0.0615527	++
cg15504461	3	147140880	NA		N_Shore	0.0249312	0.000124856	3.41438e-05	0.000224782	0.383502	0.00258204	4.09888e-05	0.0140703	++	0.0248197	0.000122514	0.0180062	0.106364	++	0.025025	0.000150022	0.000938414	0.00604993	++	0.378101	0.00265187	0.0188217	0.593649	++	0.385621	0.00235091	0.00508578	0.190532	++
cg18473521	12	54448265	HOXC4	Body;Body	S_Shore	0.0275209	0.000174167	4.20158e-05	0.00027215	0.539345	0.00417648	1.61893e-10	1.49037e-06	++	0.0286995	0.000124722	0.111967	0.362759	++	0.0265284	0.000197481	0.00116027	0.00729087	++	0.551743	0.00358018	0.00102659	0.405034	++	0.534478	0.0046865	7.85184e-08	0.000274678	++
cg11456013	6	111192760	NA		N_Shelf	0.553625	0.0010204	5.11652e-05	0.000326219	0.84523	0.00139906	0.000125218	0.0288188	++	0.552852	0.000918268	0.0372708	0.177821	++	0.554276	0.00107926	0.00289962	0.0161029	++	0.850056	0.000864705	0.11363	0.702792	++	0.843336	0.00139786	0.00540733	0.19515	++
cg24683414	1	92952581	GFI1	TSS1500;TSS200	Island	0.0220506	8.44429e-05	5.28775e-05	0.000336252	0.212851	0.0019378	0.000162012	0.0336157	++	0.0223243	6.44377e-05	0.087687	0.312479	++	0.0218201	9.08634e-05	0.00147152	0.00896315	++	0.225101	0.00118963	0.226111	0.768977	++	0.208043	0.0017523	0.00530918	0.193902	++
cg01497613	17	48041301	NA		Island	0.0186795	9.44905e-05	5.48684e-05	0.000347798	0.102025	0.00123721	3.99362e-05	0.0138874	++	0.0183675	5.04801e-05	0.202065	0.508021	++	0.0189422	0.000100549	0.00241928	0.0137767	++	0.100575	0.000871029	0.134219	0.717457	++	0.102593	0.00123147	0.00114823	0.103393	++
cg06156376	3	157823814	SHOX2	1stExon;1stExon;5'UTR;5'UTR;1stExon;5'UTR	Island	0.0468691	0.000235095	5.51049e-05	0.00034919	0.233243	0.00140805	7.26713e-05	0.0202892	++	0.049489	0.00016321	0.169675	0.461379	++	0.0446628	0.000254485	0.00033751	0.00246495	++	0.235308	0.00119389	0.0163906	0.587713	++	0.232432	0.00144777	0.00476526	0.18584	++
cg16303918	2	219848528	FEV	Body	N_Shore	0.0402665	0.000255325	5.51781e-05	0.000349602	0.134908	0.00112967	0.000158012	0.0330998	++	0.0412531	0.000345683	0.000601272	0.00774234	++	0.0394356	0.000143115	0.104083	0.291856	++	0.140472	0.00121585	0.0503281	0.646162	++	0.132724	0.00127645	0.000444682	0.0673474	++
cg00965748	20	39319235	MAFB	TSS1500	Island	0.0615094	0.00051907	5.57205e-05	0.000352809	0.224619	0.0014966	9.88133e-07	0.00107352	++	0.0640688	0.000446956	0.077134	0.28806	++	0.0593542	0.000414569	0.00605967	0.0302828	++	0.222239	0.00180177	0.00220703	0.456976	++	0.225554	0.00132583	0.00061223	0.0776973	++
cg20461912	3	138664350	FOXL2	1stExon;3'UTR	Island	0.0427339	0.000283936	5.58866e-05	0.00035379	0.259277	0.00175832	2.9314e-07	0.000438239	++	0.0435347	0.000445622	0.00259895	0.0244473	++	0.0420595	0.000223157	0.0129581	0.0575227	++	0.258482	0.00188233	0.00346291	0.491541	++	0.25959	0.00166622	0.000234711	0.0487288	++
cg17156803	10	102416598	NA		Island	0.090315	0.000542584	5.76993e-05	0.000364374	0.186306	0.00147073	2.51585e-05	0.0102816	++	0.0926089	0.000451752	0.0586866	0.241484	++	0.0883833	0.000660487	7.5213e-05	0.000655819	++	0.183814	0.000694547	0.258081	0.78485	++	0.187285	0.00202678	1.75557e-05	0.0112275	++
cg02225085	5	87975992	LOC645323	Body	N_Shore	0.0221906	0.000142821	7.34643e-05	0.000455209	0.1131	0.00152806	0.000256663	0.0440782	++	0.0233708	0.000231019	0.00194881	0.019591	++	0.0211967	0.000130315	0.00615764	0.030706	++	0.102786	0.00143303	0.0364404	0.627797	++	0.117149	0.00156865	0.00444988	0.180941	++
cg04809453	16	1030383	SOX8	TSS1500	Island	0.017944	0.000118905	8.31203e-05	0.000509948	0.215168	0.00264123	0.000262676	0.0446506	++	0.0193625	8.99944e-05	0.224065	0.536895	++	0.0167494	0.000134909	7.62379e-06	8.68607e-05	++	0.22278	0.000750515	0.563021	0.901591	++	0.21218	0.00435856	6.11964e-06	0.00575003	++
cg14462779	10	76803669	DUPD1	Body	Island	0.315517	0.00103578	8.43796e-05	0.000517003	0.480056	0.00154597	0.000230972	0.0414785	++	0.320467	0.00110265	0.0401168	0.187011	++	0.311349	0.00114875	0.00108304	0.00686452	++	0.475091	0.00158476	0.0131081	0.574921	++	0.482005	0.00175423	0.00321975	0.159112	++
cg07123069	12	54367250	HOXC11	1stExon	Island	0.0248913	0.00018292	9.03658e-05	0.000550705	0.156106	0.00134149	1.15853e-05	0.00623318	++	0.0256834	0.000115254	0.159989	0.446893	++	0.0242242	0.000238178	0.000284653	0.00212249	++	0.150566	0.0017835	0.000372946	0.352456	++	0.158281	0.000936961	0.0210528	0.318161	++
cg18822243	12	24567687	SOX5	5'UTR	OpenSea	0.591061	0.00151352	9.44862e-05	0.000573695	0.721222	-0.00347342	2.89203e-05	0.0113547	+-	0.597596	0.00200078	0.0105556	0.0717873	++	0.585558	0.00139865	0.00704507	0.0344358	++	0.726258	-0.00282066	0.0864044	0.681987	--	0.719245	-0.00458133	1.14153e-05	0.00860642	--
cg23676151	6	108491372	NR2E1	Body	Island	0.0232919	0.000118945	0.000103132	0.000622028	0.213493	0.00212201	7.08824e-05	0.0199009	++	0.0239521	5.39422e-05	0.379679	0.695017	++	0.0227359	0.000158121	4.58405e-05	0.000423823	++	0.196542	0.00200607	0.0255002	0.607918	++	0.220147	0.00214917	0.00321316	0.15902	++
cg04819760	10	22765645	NA		Island	0.0548962	0.000633929	0.000114885	0.000686772	0.116402	0.00124771	1.83801e-05	0.00836128	++	0.0563865	0.000817982	0.000302679	0.00449413	++	0.0536413	0.000588269	0.0189694	0.0788316	++	0.111732	0.00093625	0.065782	0.663902	++	0.118235	0.00158376	6.4907e-05	0.0246004	++
cg21992250	11	60718709	SLC15A3	1stExon;Body	Island	0.115478	0.000891641	0.000124829	0.000740777	0.265589	0.00140527	0.000126033	0.0288922	++	0.122246	0.00071466	0.191471	0.492983	++	0.109778	0.00123853	3.49924e-07	5.70079e-06	++	0.266435	0.000519817	0.474467	0.873466	++	0.265257	0.00190242	2.64974e-05	0.0144738	++
cg13645908	17	714733	NXN	Body	S_Shore	0.879675	0.00134505	0.000130352	0.000770886	0.953416	-0.000647657	4.10252e-05	0.0140703	+-	0.872357	0.00226231	0.011813	0.0780567	++	0.885838	0.00081934	0.000896898	0.00581533	++	0.95732	-0.000935397	0.00011858	0.240233	--	0.951883	-0.000559497	0.0121447	0.263551	--
cg08660876	4	154681323	RNF175	5'UTR;1stExon	Island	0.0487942	0.000355837	0.000133666	0.000788916	0.200613	0.0014182	3.57288e-05	0.0127539	++	0.0504709	0.000293913	0.198771	0.503411	++	0.0473822	0.000413904	4.76296e-06	5.73188e-05	++	0.200786	0.000741596	0.252306	0.782081	++	0.200545	0.00192684	1.22092e-05	0.00882805	++
cg02381192	7	1452425	NA		Island	0.0469695	-0.000279988	0.000138539	0.000815161	0.208108	0.00197842	2.93832e-06	0.00237012	-+	0.0460395	-0.000270563	0.0416471	0.191927	--	0.0477526	-0.000324931	0.00226324	0.0130018	--	0.198745	0.00272484	0.000307447	0.334413	++	0.211783	0.00172084	0.0023379	0.140092	++
cg22719623	6	154360732	OPRM1	1stExon;1stExon;Body;1stExon;1stExon;1stExon;1stExon;1stExon;5'UTR;1stExon;Body;1stExon	Island	0.0747082	0.000409779	0.000141521	0.000831164	0.401612	0.00205637	3.28883e-05	0.0122121	++	0.0793058	0.000332606	0.0678625	0.265402	++	0.0708365	0.000455899	0.0045256	0.0235849	++	0.392676	0.00255033	0.0012744	0.418023	++	0.405119	0.00152767	0.0249485	0.337878	++
cg03854796	11	31819162	PAX6	Body;Body;Body	N_Shore	0.038727	0.000334608	0.000149157	0.000872315	0.256936	0.00126822	0.000193734	0.0375058	++	0.0405926	0.000298295	0.121202	0.380354	++	0.0371561	0.000346448	0.00114986	0.00723368	++	0.251701	0.00166768	0.00692028	0.534144	++	0.25899	0.000904779	0.041661	0.403199	++
cg03166835	19	50393997	IL4I1	Body;Body	Island	0.0476196	0.00022491	0.000162064	0.000940904	0.223075	0.00137476	6.92529e-05	0.0195906	++	0.0484994	0.000136703	0.191886	0.493527	++	0.0468787	0.000268501	0.00118916	0.00744822	++	0.224084	0.00127583	0.0268764	0.611772	++	0.222678	0.00142863	0.0021087	0.134196	++
cg00088042	10	103892309	PPRC1	TSS1500	N_Shore	0.0788046	-0.000595341	0.000189793	0.00108848	0.0394285	0.000624979	3.53105e-06	0.00272683	-+	0.0723053	-0.000185973	0.540128	0.80647	--	0.0842777	-0.000784231	0.000385617	0.00277025	--	0.0413922	0.000375703	0.104138	0.697329	++	0.0386578	0.000897468	9.17096e-07	0.0016141	++
cg05579351	3	87839841	NA		N_Shore	0.966127	0.000391867	0.000236784	0.00133414	0.972134	-0.000435964	0.000315471	0.0498892	+-	0.965497	0.000360277	0.0949882	0.328479	++	0.966657	0.000390895	0.00640242	0.0317471	++	0.972352	-1.4584e-05	0.927587	0.987852	--	0.972048	-0.000717665	2.09306e-05	0.0122842	--
cg10658666	2	63276718	OTX1	TSS1500	Island	0.0275334	0.000151933	0.000240473	0.00135287	0.252981	0.00166086	4.93118e-06	0.00352052	++	0.0295314	0.000115904	0.139678	0.413524	++	0.0258508	0.000133572	0.0150502	0.0651474	++	0.245429	0.000887266	0.192275	0.751327	++	0.255945	0.00224622	9.18189e-07	0.0016141	++
cg05917988	6	44281197	AARS2	TSS200	Island	0.0428451	-0.000151205	0.000251824	0.00141116	0.133781	0.00156757	5.78892e-07	0.000727027	-+	0.0435162	-0.000271235	0.000534298	0.00705467	--	0.04228	-0.000111354	0.0394971	0.141915	--	0.12718	0.00162142	0.00267693	0.473442	++	0.136372	0.00180679	1.79592e-05	0.0113811	++
cg14679587	12	56882324	GLS2	TSS200	Island	0.0197641	-7.14827e-05	0.00025633	0.00143441	0.0576986	0.00122105	5.7932e-06	0.00393517	-+	0.0191392	-3.68711e-05	0.356296	0.675097	--	0.0202903	-0.000110876	9.04993e-06	0.000100988	--	0.0517758	0.00144646	9.4851e-05	0.227382	++	0.0600235	0.00105513	0.00629367	0.206719	++
cg11741189	11	31843886	NA		S_Shore	0.0304299	0.000196019	0.000259822	0.00145211	0.14037	0.0021259	0.000293977	0.0479221	++	0.0317087	5.18183e-05	0.625771	0.854477	++	0.029353	0.000280254	2.09754e-05	0.000212119	++	0.130187	0.00281381	0.00084154	0.393357	++	0.144368	0.00169005	0.0452957	0.414056	++
cg06644373	2	200321348	SATB2	5'UTR	Island	0.0176689	9.41181e-05	0.000261898	0.00146262	0.13158	0.00188748	4.73716e-05	0.01543	++	0.0182474	0.000104187	0.058978	0.242295	++	0.0171817	8.21022e-05	0.011389	0.051636	++	0.121932	0.00234299	0.0053236	0.515937	++	0.135367	0.00172433	0.00562081	0.197718	++
cg14377594	9	1051505	DMRT2	5'UTR;5'UTR;5'UTR	N_Shore	0.113452	0.00105655	0.000267588	0.00149153	0.223089	0.00247509	0.000175105	0.0352859	++	0.112081	0.000668351	0.242063	0.55914	++	0.114607	0.0011673	0.0016691	0.0100018	++	0.211303	0.00306298	0.00680136	0.533199	++	0.227714	0.00216063	0.0150308	0.284826	++
cg15995695	1	179334675	C1orf125	TSS1500;TSS200	N_Shore	0.254828	-0.0011093	0.000276921	0.00153889	0.134756	0.00166276	4.85851e-05	0.0156504	-+	0.258525	-0.00113797	0.054565	0.230155	--	0.251715	-0.00097447	0.0151581	0.0655374	--	0.140937	0.00182893	0.00284068	0.479472	++	0.13233	0.00180448	0.00192945	0.129852	++
cg23500537	5	140419819	NA		OpenSea	0.109652	0.000754282	0.000277548	0.0015421	0.411559	0.00289326	4.6411e-08	0.000105446	++	0.110438	0.000464264	0.269181	0.590286	++	0.108991	0.000703554	0.00250937	0.0142202	++	0.405812	0.00328969	3.08987e-05	0.172476	++	0.413815	0.00257336	0.000492848	0.0704433	++
cg18920097	15	35045695	GJD2	Body	N_Shore	0.0420577	0.000251536	0.000280009	0.00155499	0.275706	0.00178924	0.000299215	0.0484597	++	0.0431762	0.000205526	0.0710979	0.273554	++	0.0411158	0.000197961	0.0417744	0.148284	++	0.266898	0.00214567	0.0103851	0.557889	++	0.279163	0.00123068	0.0599148	0.453723	++
cg01141812	6	123317124	CLVS2	TSS1500	N_Shore	0.0225817	0.000122402	0.000288634	0.00159889	0.198799	0.00199909	3.67262e-07	0.000511864	++	0.0235573	0.000184988	0.00591783	0.046247	++	0.0217602	0.000123509	0.00559198	0.0282658	++	0.192652	0.0018058	0.00661772	0.531726	++	0.201213	0.00215499	3.97463e-05	0.0182951	++
cg16386080	9	90589146	CDK20	Body;Body;Body;Body;Body	N_Shore	0.0329751	0.000177416	0.000296712	0.00163992	0.231414	0.00117113	0.000139185	0.0306487	++	0.0344954	0.000117727	0.241792	0.55882	++	0.0316949	0.000193066	0.00144745	0.00883612	++	0.229156	0.00107927	0.0803733	0.677055	++	0.2323	0.00113093	0.00366073	0.167401	++
cg14636534	5	87968528	LOC645323	Body;Body;Body	N_Shore	0.0327756	0.000145598	0.000309551	0.00170438	0.325793	0.00269388	0.000200064	0.0381993	++	0.0325778	0.000127281	0.0871355	0.3113	++	0.0329422	0.000141606	0.00914098	0.0429212	++	0.314482	0.00236906	0.0324849	0.622412	++	0.330232	0.00246387	0.013805	0.27646	++
cg04090392	15	83952774	BNC1	Body	Island	0.0158708	8.30388e-05	0.000337148	0.00184162	0.22862	0.00194714	5.04198e-07	0.000655693	++	0.0162162	7.00898e-05	0.10418	0.347549	++	0.0155798	0.000111812	0.00093579	0.00603513	++	0.224011	0.00189712	0.00415614	0.499857	++	0.23043	0.00201544	0.000123357	0.035459	++
cg26417361	6	99292838	NA		Island	0.023841	0.000102386	0.000346852	0.00188957	0.115187	0.00101365	0.000101145	0.0252016	++	0.0246591	0.000131943	0.00258388	0.0243398	++	0.0231521	8.96905e-05	0.0335135	0.124596	++	0.114081	0.000358748	0.398936	0.845809	++	0.115621	0.00124336	0.00046097	0.0684435	++
cg10526277	3	157813363	NA		S_Shore	0.0265957	0.000255956	0.000364175	0.0019755	0.129322	0.00168951	4.54495e-05	0.0149799	++	0.0247055	0.000147219	0.185772	0.484966	++	0.0281875	0.000316211	0.00158285	0.00955074	++	0.122973	0.00205391	0.000669515	0.379927	++	0.131815	0.00121016	0.0338578	0.375034	++
cg11730703	14	105167607	INF2	5'UTR;5'UTR;5'UTR	N_Shore	0.728264	0.00229484	0.000371156	0.00200983	0.94865	-0.000769121	3.82685e-05	0.0134411	+-	0.731618	0.00109839	0.317325	0.639672	++	0.725439	0.00337843	0.000397335	0.0028447	++	0.948537	-0.000602781	0.081556	0.678212	--	0.948694	-0.000764133	0.00134604	0.111259	--
cg06570224	3	157812475	NA		Island	0.0804198	0.000570796	0.000385557	0.00208016	0.36325	0.00209096	2.72079e-08	6.75037e-05	++	0.0754569	0.000681307	0.00632504	0.0486822	++	0.0845991	0.000482166	0.0479205	0.164864	++	0.354617	0.00196467	0.00106641	0.409053	++	0.366639	0.00224921	1.26072e-05	0.00901904	++
cg04499151	7	100231278	TFR2	Body	Island	0.0214787	-0.000235511	0.000389182	0.00209809	0.0363397	0.000634626	1.10782e-06	0.00116032	-+	0.0200899	-0.000116986	0.0502873	0.2179	--	0.0226482	-0.0002876	0.0146906	0.0638645	--	0.0381322	0.000307964	0.110102	0.700805	++	0.0356361	0.000870339	1.32445e-06	0.0020777	++
cg25246431	11	12398874	PARVA	TSS1500	N_Shore	0.0225225	0.00014015	0.000422791	0.00226179	0.106369	0.00169711	0.000292683	0.0478672	++	0.0235785	0.000118008	0.127697	0.392498	++	0.0216332	0.000186544	0.000452108	0.0031898	++	0.0964399	0.00157199	0.0168019	0.589119	++	0.110266	0.00190801	0.00506492	0.190242	++
cg20682981	17	1962627	HIC1	3'UTR;3'UTR	S_Shore	0.0406559	0.000198251	0.000447689	0.00238298	0.145225	0.00161007	0.000153078	0.0325026	++	0.041528	0.000133431	0.190322	0.491331	++	0.0399215	0.000209955	0.00376677	0.0201568	++	0.141083	0.00130743	0.0694375	0.667862	++	0.146851	0.00190668	0.000828935	0.0894457	++
cg01844642	3	51989764	GPR62	1stExon	Island	0.200253	0.000668679	0.000473616	0.00250819	0.500739	0.00157328	0.000122772	0.028424	++	0.200121	0.000751393	0.043094	0.196412	++	0.200364	0.000853939	0.00102401	0.00653345	++	0.488541	0.00105889	0.117194	0.704947	++	0.505527	0.00149056	0.00646329	0.209025	++
cg18400845	11	31837960	PAX6	5'UTR	Island	0.0188341	9.64552e-05	0.000483195	0.00255465	0.10112	0.000994456	0.000165564	0.0340298	++	0.0193558	0.00012308	0.0452739	0.203047	++	0.0183947	9.02386e-05	0.00342861	0.0185904	++	0.102912	0.00100695	0.0420362	0.636374	++	0.100417	0.000840733	0.0139422	0.277461	++
cg18798289	5	72530245	NA		S_Shore	0.0834893	0.000642724	0.000494784	0.00261032	0.229176	0.00187323	0.000187512	0.0368107	++	0.0810323	0.000735557	0.0198496	0.114171	++	0.0855583	0.000574656	0.0239739	0.0953637	++	0.226993	0.000887576	0.336982	0.81987	++	0.230033	0.00235099	0.000398475	0.0640612	++
cg19645221	14	38058284	NA		S_Shore	0.0400853	0.000343609	0.000585678	0.00304243	0.127529	0.00140562	0.000218224	0.0401353	++	0.0414345	0.000660537	0.000886399	0.0105308	++	0.0389491	0.000145995	0.212299	0.466707	++	0.114221	0.00229332	1.76627e-06	0.0926128	++	0.132753	0.00118821	0.0322789	0.369204	++
cg12910561	20	21081216	NA		Island	0.0374395	0.000163211	0.000607631	0.00314693	0.0695659	0.00082122	0.000298093	0.0483901	++	0.0381629	0.00017486	0.0369736	0.176841	++	0.0368303	0.000142601	0.0271921	0.105515	++	0.0708938	0.000895658	0.0449582	0.639965	++	0.0690447	0.00087625	0.00293716	0.152987	++
cg22390041	1	19226319	ALDH4A1	Body;Body	N_Shelf	0.976355	-0.000172584	0.000672533	0.00345179	0.976948	-0.000385072	0.000206501	0.0388385	--	0.974249	-0.000209535	0.0379262	0.179921	--	0.978128	-0.000167908	0.0145102	0.0631979	--	0.97714	-0.000412962	0.031135	0.61987	--	0.976873	-0.000353967	0.0102321	0.248195	--
cg04269188	14	105767882	BRF1	TSS1500	Island	0.0362927	0.000196063	0.000687551	0.00352316	0.0339383	0.000503172	5.55191e-06	0.00380079	++	0.0377278	0.00021481	0.0777837	0.289629	++	0.0350843	0.000169348	0.0205257	0.0840463	++	0.0348013	0.00073043	0.000104962	0.235858	++	0.0335996	0.000489485	0.000725174	0.0840573	++
cg02063759	1	119543295	NA		Island	0.0321761	0.000151292	0.000689886	0.00353395	0.158666	0.00141612	0.000177389	0.0355413	++	0.032752	8.5607e-05	0.331936	0.653244	++	0.0316911	0.000187132	0.00146067	0.00890531	++	0.152148	0.001651	0.00215568	0.454188	++	0.161224	0.000958461	0.0693013	0.475846	++
cg07364220	18	55105880	ONECUT2	Body	Island	0.0504499	0.000162851	0.000729001	0.00371579	0.133382	0.00117207	3.39321e-05	0.0124413	++	0.0519235	0.000125419	0.250266	0.568863	++	0.049209	0.000166418	0.00130547	0.00807534	++	0.12792	0.00118351	0.0152508	0.585382	++	0.135526	0.00124921	0.00125933	0.107837	++
cg19049194	2	175193754	NA		Island	0.0405917	0.000174237	0.000752972	0.00382575	0.193393	0.00132231	0.000139516	0.0306958	++	0.0409849	0.000104584	0.212201	0.521447	++	0.0402605	0.00016083	0.0113466	0.0514809	++	0.192589	0.00166642	0.00652887	0.531307	++	0.193709	0.00109713	0.0190841	0.308523	++
cg18920858	17	64617748	PRKCA	Body	OpenSea	0.93902	-0.000371626	0.000771901	0.00391265	0.950271	-0.00069426	0.000286191	0.0472403	--	0.936593	-0.000553222	0.0161415	0.0981926	--	0.941064	-0.000274275	0.0561786	0.186128	--	0.948624	4.80838e-06	0.986202	0.997667	-+	0.950918	-0.00101844	0.000140038	0.0380941	--
cg26805749	11	16627534	NA		Island	0.0207261	9.13853e-05	0.00081295	0.00410075	0.160393	0.0018279	2.38256e-05	0.00992241	++	0.0203841	0.000144515	0.00380262	0.0328665	++	0.021014	8.79851e-05	0.028899	0.110753	++	0.15967	0.00144936	0.0765218	0.674014	++	0.160676	0.00227501	2.47848e-05	0.0138504	++
cg26921969	5	92948217	NA		OpenSea	0.0174917	8.40186e-05	0.000832725	0.00419055	0.28152	0.00219649	5.36828e-06	0.00370407	++	0.01765	0.000140001	0.0127304	0.0824149	++	0.0173584	6.73677e-05	0.016971	0.0719291	++	0.279679	0.00219741	0.0133298	0.574993	++	0.282242	0.00232141	0.000325011	0.0582432	++
cg27213509	2	176947228	EVX2	Body	Island	0.040177	0.00021918	0.000851613	0.00427735	0.211555	0.00149245	1.76409e-06	0.00165475	++	0.0439331	0.00015621	0.289325	0.611942	++	0.0370139	0.000261256	0.00132005	0.00815138	++	0.207018	0.00175178	0.00440085	0.501239	++	0.213336	0.00113443	0.00319534	0.158555	++
cg21487207	12	54410576	HOXC4	TSS200;TSS200;TSS200	N_Shore	0.0293446	0.000202566	0.000946608	0.00470895	0.112925	0.00141541	8.0623e-06	0.00492422	++	0.0297508	0.000336429	0.00603965	0.0469657	++	0.0290025	0.000193059	0.0129921	0.0576443	++	0.111373	0.00137646	0.0133892	0.575895	++	0.113534	0.00132872	0.001685	0.122396	++
cg09817427	6	85474313	TBX18	TSS1500	S_Shore	0.0136518	7.19615e-05	0.00100161	0.00495706	0.119736	0.00141215	2.62677e-07	0.000403031	++	0.0143344	5.50223e-05	0.277815	0.599811	++	0.013077	9.3261e-05	0.000631142	0.00427751	++	0.118363	0.00129339	0.0101781	0.555987	++	0.120275	0.00159306	1.43067e-05	0.00987149	++
cg00054771	2	175202397	NA		Island	0.0324358	0.000184195	0.00109211	0.00536035	0.139996	0.00114202	0.000265026	0.0449626	++	0.0344354	0.000111725	0.289514	0.61214	++	0.030752	0.000171457	0.0161525	0.0690531	++	0.153196	0.000900039	0.120198	0.706268	++	0.134815	0.0013232	0.00132573	0.110351	++
cg23740491	6	27228267	NA		Island	0.057609	0.000419181	0.00113277	0.00553716	0.211044	0.00165407	0.000255014	0.0439245	++	0.0602974	0.00053968	0.0423151	0.193983	++	0.055345	0.000316551	0.0267153	0.104004	++	0.204803	0.00211299	0.000476203	0.371782	++	0.213494	0.00130479	0.0450244	0.413386	++
cg08039301	17	47072907	NA		Island	0.127381	0.000324013	0.0012562	0.00607999	0.208323	0.00153499	8.59354e-07	0.000988896	++	0.130519	0.000335433	0.0476431	0.210196	++	0.124739	0.000338921	0.0254025	0.0999221	++	0.212935	0.00171586	0.00576397	0.520748	++	0.206513	0.00143268	0.000326875	0.0583118	++
cg22358580	12	54426725	HOXC4	5'UTR;TSS200;Body	N_Shore	0.0291586	0.000135955	0.00126502	0.00611879	0.241481	0.00175595	4.84151e-07	0.000636724	++	0.0282072	5.29311e-05	0.320104	0.642272	++	0.0299597	0.000132884	0.0367354	0.134003	++	0.237176	0.00211507	6.41101e-05	0.20766	++	0.243171	0.0017324	0.000350403	0.060183	++
cg06645033	1	50890678	NA		Island	0.022606	8.92814e-05	0.00130975	0.00631182	0.238311	0.00222377	3.76379e-05	0.0132595	++	0.0235199	7.2817e-05	0.16639	0.456531	++	0.0218365	0.000108852	0.00594084	0.0297775	++	0.236158	0.0018004	0.0578159	0.654979	++	0.239156	0.00240328	0.000712139	0.0832915	++
cg10121601	1	47698126	NA		Island	0.0261518	0.000117574	0.00138871	0.00665121	0.0989378	0.000983408	7.86527e-05	0.0213604	++	0.0278274	0.000161036	0.0579606	0.239571	++	0.0247409	0.000117771	0.00550494	0.0278907	++	0.094628	0.000993361	0.0246398	0.606069	++	0.100629	0.00112906	0.000631346	0.0787962	++
cg05467160	2	176945526	EVX2	Body	Island	0.0381201	0.000212566	0.00142552	0.00681166	0.149808	0.00172336	8.10667e-05	0.021798	++	0.0392809	6.96845e-05	0.53589	0.804005	++	0.0371426	0.000298321	0.00153112	0.0092764	++	0.141775	0.00233443	0.00426292	0.499857	++	0.152961	0.00152942	0.00812459	0.228234	++
cg09513380	13	100622253	ZIC5	Body	Island	0.0436201	0.000142051	0.00148388	0.00706067	0.129744	0.00098165	0.000253716	0.0437872	++	0.0452573	7.07331e-05	0.444776	0.744846	++	0.0422413	0.00017431	0.00293214	0.0162573	++	0.128359	0.0014469	0.00367202	0.493148	++	0.130287	0.000804209	0.0243019	0.334847	++
cg23779890	8	75262522	GDAP1	TSS200;TSS200	Island	0.0534865	0.000264011	0.00149906	0.00712523	0.187257	0.0016384	1.29364e-05	0.00675446	++	0.0544727	0.000229341	0.142031	0.417457	++	0.052656	0.000190881	0.0798604	0.241566	++	0.190838	0.00134861	0.0606036	0.657997	++	0.185851	0.00213303	8.26312e-06	0.00703322	++
cg12946225	19	3573751	HMG20B	Body	Island	0.0286507	0.000109493	0.00170378	0.00799945	0.0920647	0.00110361	9.37291e-06	0.00535766	++	0.0294409	9.49253e-05	0.206578	0.513998	++	0.0279852	0.000137095	0.00231312	0.0132514	++	0.0942063	0.00155542	0.0010129	0.404154	++	0.0912241	0.000670945	0.027152	0.34821	++
cg07005055	1	113052167	WNT2B	Body;Body	Island	0.0178647	9.02037e-05	0.00170748	0.00801487	0.11347	0.00215436	2.60203e-06	0.00216214	++	0.0189431	6.65954e-05	0.248582	0.566882	++	0.0169565	0.000117896	0.000171414	0.00135712	++	0.12495	0.00111163	0.1753	0.740969	++	0.108963	0.00278628	2.20527e-06	0.00288937	++
cg13696752	9	4662858	C9orf68	Body;1stExon	Island	0.0712139	0.000400291	0.00178303	0.00833271	0.241999	0.00153234	0.000175795	0.0353809	++	0.0717751	0.000530355	0.0439004	0.198947	++	0.0707413	0.000366666	0.0174004	0.0733991	++	0.239423	0.000953508	0.0945626	0.689197	++	0.24301	0.00229976	8.30496e-05	0.0282283	++
cg12638731	13	36045281	NBEA	Body	Island	0.0351188	0.000197643	0.00179876	0.00839802	0.226805	0.00224081	8.77008e-06	0.00517369	++	0.0354061	0.000216009	0.0734329	0.279147	++	0.0348769	0.00021161	0.0141363	0.0618213	++	0.211567	0.00220929	0.0123609	0.569822	++	0.232787	0.00218219	0.00120736	0.105808	++
cg06760077	2	119068497	NA		OpenSea	0.455265	-0.000894036	0.00201105	0.00928161	0.611899	0.00189651	0.00022655	0.0410213	-+	0.452304	-0.00085827	0.0600047	0.245	--	0.457759	-0.000761725	0.0647269	0.20691	--	0.608875	0.000517905	0.591123	0.909514	++	0.613086	0.002472	0.000190231	0.0444837	++
cg05208605	11	116451437	NA		Island	0.0303049	0.000177407	0.0020428	0.00941258	0.16976	0.00113312	0.000305114	0.0489843	++	0.031526	0.000198494	0.0549549	0.231258	++	0.0292766	0.0001582	0.0681794	0.215078	++	0.164129	0.000950947	0.0622535	0.659503	++	0.17197	0.00137746	0.00146536	0.115325	++
cg14901671	17	70589079	NA		Island	0.0826212	0.000232593	0.00208152	0.0095718	0.175278	0.00103997	3.81977e-07	0.000527801	++	0.084095	0.000283558	0.0707694	0.272763	++	0.08138	0.000137655	0.14454	0.365497	++	0.171952	0.0011591	0.000836712	0.393357	++	0.176584	0.00115542	3.44878e-05	0.0168738	++
cg20974724	7	121944450	FEZF1	1stExon;1stExon	Island	0.0173453	8.34575e-05	0.0021043	0.009666	0.16517	0.00185162	1.93615e-06	0.00174461	++	0.0180385	0.000133066	0.0108389	0.0732095	++	0.0167616	7.06741e-05	0.0667698	0.211765	++	0.157186	0.00162483	0.0149062	0.584027	++	0.168304	0.00202046	0.000144335	0.0386187	++
cg11602901	3	62354878	NA		Island	0.0470982	0.000286889	0.00226881	0.0103412	0.135689	0.00120711	2.27315e-05	0.00963887	++	0.0470625	7.74399e-05	0.579255	0.829496	++	0.0471282	0.000386282	0.00757823	0.0366137	++	0.139087	0.000916332	0.0584474	0.65573	++	0.134355	0.00114267	0.0028643	0.15175	++
cg26972969	5	87973899	LOC645323	Body;Body	N_Shore	0.0270309	0.000133192	0.00241932	0.0109516	0.0685938	0.000662524	1.79094e-05	0.00822931	++	0.0279969	9.24177e-05	0.307042	0.629554	++	0.0262174	0.000142129	0.0135802	0.0598008	++	0.0678408	0.00102842	0.000885489	0.39602	++	0.0688895	0.000528164	0.00682902	0.212996	++
cg16969368	17	57642752	DHX40	TSS200;TSS200	Island	0.0612548	0.000264846	0.00244406	0.0110539	0.280615	0.00354481	1.02827e-09	6.00691e-06	++	0.0620436	0.000214612	0.219767	0.531423	++	0.0605906	0.000252577	0.0276878	0.107049	++	0.294381	0.00405191	0.000422701	0.35965	++	0.275211	0.00362129	8.67454e-07	0.00156817	++
cg05296818	14	61117162	SIX1	TSS1500	S_Shore	0.04043	0.00034195	0.00277405	0.0123784	0.221434	0.00123418	0.000173892	0.0350969	++	0.0435841	0.000583852	0.000499099	0.00668902	++	0.0377739	0.000146983	0.391944	0.661283	++	0.215323	0.00110538	0.0702899	0.669043	++	0.223833	0.00120931	0.00460717	0.183634	++
cg14361627	7	130419116	KLF14	TSS1500	Island	0.041397	0.000141885	0.00278026	0.0124034	0.292361	0.00258815	4.04969e-09	1.64731e-05	++	0.0430033	-5.37382e-05	0.533884	0.802805	+-	0.0400444	0.000176943	0.00177495	0.0105457	++	0.293589	0.00244628	0.00929533	0.548672	++	0.291879	0.0031373	5.36838e-09	5.70074e-05	++
cg12475507	1	3567852	TP73	TSS1500;TSS1500	Island	0.0967927	0.000805553	0.00286843	0.0127567	0.401346	0.00212926	0.000240028	0.0424724	++	0.108483	0.000909006	0.170978	0.463495	++	0.0869484	0.000946262	1.55249e-06	2.12578e-05	++	0.396307	0.00244105	0.0104879	0.558299	++	0.403324	0.00153983	0.0439943	0.410497	++
cg16867657	6	11044877	ELOVL2	TSS1500	Island	0.0329796	0.000335759	0.00289572	0.0128651	0.740697	0.00432519	1.4948e-13	3.76062e-09	++	0.0343309	0.000332515	0.132923	0.40187	++	0.0318417	0.000275662	0.0477967	0.164539	++	0.753799	0.00379087	0.00011302	0.238177	++	0.735554	0.00456048	1.16746e-08	8.24233e-05	++
cg11028201	4	41867562	NA		Island	0.0263484	0.00012864	0.00295849	0.0131168	0.180746	0.00246796	6.20841e-05	0.0182051	++	0.0267496	0.000126288	0.11978	0.377715	++	0.0260107	0.000133575	0.0106714	0.0488633	++	0.161543	0.00196319	0.0509297	0.646747	++	0.188284	0.00240264	0.00396995	0.173231	++
cg00479208	22	50656893	TUBGCP6	Body	Island	0.958795	0.000159353	0.00299892	0.0132742	0.96953	-0.000469152	8.32258e-05	0.0220744	+-	0.958373	0.000169314	0.0891809	0.315764	++	0.95915	0.000155887	0.0430007	0.151609	++	0.970107	-0.000181861	0.169417	0.738004	--	0.969303	-0.000725515	4.52153e-05	0.0199968	--
cg00059225	5	151304357	GLRA1	1stExon;1stExon;5'UTR;5'UTR	Island	0.0282693	0.000104763	0.00299941	0.0132759	0.387878	0.00215929	3.50519e-05	0.0126283	++	0.029366	5.14371e-05	0.466078	0.759732	++	0.0273457	9.08354e-05	0.0188972	0.0785884	++	0.372337	0.00255484	0.000622405	0.375915	++	0.393978	0.00189096	0.0111712	0.255976	++
cg17882660	13	100637258	ZIC2	Body	Island	0.0324558	0.000140216	0.0030147	0.0133352	0.183506	0.00140745	0.000215742	0.0399446	++	0.0340656	-6.15486e-05	0.510932	0.789002	+-	0.0311001	0.000206456	0.000388247	0.00278669	++	0.178761	0.00122044	0.051473	0.647467	++	0.185368	0.00134642	0.00974995	0.243332	++
cg24051481	13	95364062	SOX21	1stExon	Island	0.0428226	0.000220098	0.00308935	0.0136274	0.133249	0.00155194	2.8113e-06	0.00231404	++	0.0432712	0.000170478	0.152682	0.435096	++	0.0424449	0.000306702	0.00427358	0.0224534	++	0.123133	0.002091	3.63839e-05	0.179267	++	0.13722	0.00147415	0.00170494	0.12288	++
cg27061971	5	72746990	NA		Island	0.0288379	9.43934e-05	0.00310575	0.013691	0.129965	0.0013201	2.10699e-05	0.00920199	++	0.0294368	0.000133555	0.0238303	0.129881	++	0.0283335	8.75415e-05	0.0496525	0.169383	++	0.124399	0.00203616	0.000289493	0.330217	++	0.132149	0.00102125	0.0138681	0.276885	++
cg12899421	1	151512592	TUFT1	TSS200;TSS200	N_Shore	0.0399542	0.00016279	0.00323698	0.0141989	0.114766	0.00145509	7.68356e-08	0.000158112	++	0.0411261	4.16949e-05	0.648876	0.866035	++	0.0389673	0.000181698	0.0162935	0.0695426	++	0.111617	0.000824329	0.0421547	0.636374	++	0.116002	0.00206175	5.55059e-08	0.000215749	++
cg23519626	11	74022930	P4HA3	TSS1500	S_Shore	0.0518582	0.000359846	0.00330096	0.0144451	0.256748	0.00225127	0.000221955	0.0405037	++	0.0503745	0.000320949	0.241093	0.557984	++	0.0531076	0.000364742	0.0158931	0.0681286	++	0.253364	0.00222711	0.012864	0.574072	++	0.258077	0.00264786	0.00195225	0.130433	++
cg10290276	11	2291754	ASCL2	1stExon;5'UTR	Island	0.0334406	-0.000137175	0.00335834	0.0146662	0.167154	0.00163506	0.000269835	0.0454698	-+	0.0332213	-0.000202092	0.0200412	0.114942	--	0.0336252	-0.000108228	0.087405	0.257854	--	0.16389	0.00152023	0.0292933	0.615849	++	0.168435	0.00164147	0.00729021	0.218329	++
cg19744587	3	53880376	IL17RB	TSS200;5'UTR;1stExon	Island	0.0316034	-0.000153817	0.00350357	0.0152306	0.0414069	0.00062033	2.92112e-06	0.00237012	-+	0.0312558	-0.000187728	0.0134239	0.0857744	--	0.0318961	-0.000166753	0.0369893	0.134728	--	0.0391616	0.000605152	0.0124576	0.570311	++	0.0422882	0.000726072	3.40423e-05	0.016726	++
cg08084860	2	237080340	NA		Island	0.0270609	0.000146781	0.0035379	0.0153635	0.147808	0.00107323	0.000187026	0.0367897	++	0.0283166	9.08373e-05	0.346135	0.666195	++	0.0260034	0.000164484	0.0143655	0.0626599	++	0.149074	0.000817073	0.0977493	0.691311	++	0.147312	0.00115645	0.00272057	0.148852	++
cg23598080	1	180204499	LHX4	Body	Island	0.0260447	9.1047e-05	0.00361005	0.0156427	0.0883301	0.000967134	0.000289826	0.0475691	++	0.0270451	5.29368e-05	0.478947	0.768572	++	0.0252022	0.000106235	0.00105871	0.00672875	++	0.079544	0.000946541	0.0209721	0.599852	++	0.0917789	0.00109708	0.00331597	0.161225	++
cg25800765	12	85673347	ALX1	TSS1500	N_Shore	0.0583432	0.000405266	0.00365326	0.0158105	0.182249	0.00163774	0.000151811	0.0323234	++	0.0622206	0.000731864	0.0081463	0.0590544	++	0.0550781	0.000289679	0.118676	0.319661	++	0.180993	0.00164686	0.0204292	0.598031	++	0.182741	0.001108	0.0449468	0.413191	++
cg20288892	7	82072332	CACNA2D1	Body	Island	0.011846	4.14355e-05	0.00373229	0.0161168	0.0362575	0.000559218	0.000127375	0.0289296	++	0.0116402	2.76553e-05	0.319808	0.642034	++	0.0120193	4.47148e-05	0.0430701	0.151793	++	0.0337521	0.000263265	0.287662	0.797812	++	0.0372409	0.000775722	7.0183e-05	0.025655	++
cg00182727	20	44640501	MMP9	Body	Island	0.0627452	0.000226893	0.00375734	0.0162132	0.174161	0.00100583	0.000136363	0.0302302	++	0.0644138	-8.83314e-06	0.95402	0.9857	+-	0.0613401	0.00031472	0.00235838	0.0134794	++	0.170686	0.0013126	0.0057719	0.520748	++	0.175524	0.000871314	0.0135369	0.274161	++
cg19389953	7	121939827	NA		N_Shore	0.0133536	5.99745e-05	0.00395477	0.0169695	0.116591	0.00139377	7.70863e-06	0.00476445	++	0.0142115	9.97245e-05	0.0134261	0.0857854	++	0.012631	5.8379e-05	0.0460058	0.159782	++	0.111218	0.00157602	0.00280887	0.477708	++	0.1187	0.00141808	0.000823028	0.0892964	++
cg00393837	2	105470050	NA		Island	0.023326	8.83894e-05	0.00396256	0.0169991	0.147201	0.00195497	4.58153e-09	1.79438e-05	++	0.0241287	7.98285e-05	0.264932	0.585401	++	0.02265	9.07633e-05	0.00595545	0.0298387	++	0.147577	0.00197026	0.00144992	0.43182	++	0.147054	0.00199067	3.04832e-06	0.00362367	++
cg01930746	2	10950511	PDIA6	Body	N_Shore	0.252918	-0.000721031	0.00416433	0.01777	0.081524	-0.00120766	0.000148534	0.0319172	--	0.242366	-0.000917292	0.0511029	0.220305	--	0.261803	-0.000511991	0.129214	0.338796	--	0.0789021	-0.00166103	0.00154453	0.436814	--	0.0825532	-0.000700826	0.0992616	0.531959	--
cg10785051	5	133449927	TCF7	TSS1500;TSS1500;TSS1500;TSS1500;TSS1500	Island	0.0291543	0.000141614	0.00422649	0.0180027	0.105526	0.00136716	8.2136e-07	0.000960553	++	0.030695	0.000171377	0.0939299	0.326101	++	0.0278568	0.000175096	0.00501055	0.0257332	++	0.109261	0.00151547	0.00543468	0.518514	++	0.10406	0.00138994	8.2466e-05	0.0282002	++
cg03600516	5	14581651	FAM105A	TSS1500	Island	0.0346782	0.000137306	0.00426695	0.0181547	0.0837628	0.00117642	5.62992e-07	0.000718792	++	0.0364488	0.000101931	0.35981	0.678301	++	0.0331871	0.000161903	0.00148582	0.00903845	++	0.083826	0.00108936	0.00536398	0.517724	++	0.083738	0.00144625	6.40998e-06	0.00586368	++
cg27265170	1	50889510	DMRTA2	TSS1500	Island	0.02767	9.58567e-05	0.00428708	0.0182303	0.111761	0.00102106	0.000134338	0.0299522	++	0.0281596	9.21218e-05	0.145079	0.422585	++	0.0272577	0.000102695	0.0312208	0.117807	++	0.113514	0.000783951	0.0963731	0.690635	++	0.111073	0.00123095	0.000554122	0.0740761	++
cg26911220	1	228652478	NA		Island	0.0196523	5.21581e-05	0.00433892	0.0184225	0.0653956	0.000915472	0.000282711	0.0468274	++	0.0193727	1.75536e-05	0.634397	0.858768	++	0.0198877	7.11765e-05	0.0065509	0.0323694	++	0.0732381	0.00046019	0.386737	0.84143	++	0.0623172	0.00124725	1.83276e-05	0.011449	++
cg01879473	2	223160102	PAX3	Body;Body;Body;Body;Body;Body;Body;Body	Island	0.0256227	0.000149877	0.00458733	0.019354	0.0795034	0.000752175	0.000304704	0.0489668	++	0.0276101	0.000149475	0.0864212	0.309741	++	0.023949	0.00013505	0.0640512	0.205286	++	0.0746727	0.000967401	0.000337775	0.343438	++	0.0813995	0.000678631	0.0244741	0.335686	++
cg15406010	6	108478650	NA		Island	0.041218	0.000180417	0.00490691	0.0205322	0.184459	0.00155116	1.42201e-06	0.0014213	++	0.0416794	0.000217952	0.0977184	0.334221	++	0.0408295	0.000187479	0.0223911	0.090164	++	0.181716	0.00116265	0.0275736	0.612383	++	0.185535	0.00152806	0.000357139	0.0607388	++
cg13524919	21	34396506	NA		Island	0.109539	0.000446898	0.00503651	0.0210093	0.391068	0.00238478	0.000199374	0.0381458	++	0.108706	0.000398093	0.0840245	0.304301	++	0.110239	0.000415312	0.0698606	0.218995	++	0.381067	0.00204714	0.0622278	0.659502	++	0.394994	0.00207806	0.0128782	0.269456	++
cg04801402	6	46138912	ENPP5	TSS200	OpenSea	0.0263829	8.98006e-05	0.00522171	0.0216913	0.0855991	0.00107306	0.000170568	0.0346713	++	0.0257472	9.2305e-05	0.145756	0.423703	++	0.0269182	8.61841e-05	0.0628296	0.202381	++	0.0872027	0.000801934	0.113671	0.702835	++	0.0849696	0.00161832	1.56452e-05	0.0104848	++
cg23770904	20	61051561	GATA5	TSS1500	Island	0.0205817	8.62741e-05	0.00527732	0.0218951	0.0297377	0.000398689	0.000165952	0.034073	++	0.0210264	8.46188e-05	0.19048	0.491592	++	0.0202072	9.21245e-05	0.0165191	0.0703399	++	0.0275416	0.000254724	0.0855383	0.681651	++	0.0305998	0.000545049	0.000298876	0.0557031	++
cg19786627	14	29235904	FOXG1	TSS1500	Island	0.0224806	8.79433e-05	0.00529246	0.0219496	0.113284	0.00110819	0.000236382	0.0420028	++	0.0220425	4.62422e-05	0.421096	0.727818	++	0.0228495	0.000108299	0.00386021	0.0205846	++	0.110766	0.000807352	0.0840152	0.680093	++	0.114272	0.00119164	0.00416225	0.1766	++
cg15515258	13	112728932	NA		S_Shore	0.0355319	0.000179354	0.00535188	0.0221718	0.0897912	0.00123614	0.000195795	0.0377171	++	0.0360685	7.33678e-05	0.562917	0.820226	++	0.0350801	0.000247408	0.00535974	0.0272642	++	0.0908645	0.000583478	0.364403	0.831994	++	0.0893699	0.00110322	0.00379407	0.170105	++
cg19122206	22	48972927	FAM19A5	Body;Body	Island	0.389053	0.000504487	0.00557146	0.0229768	0.488465	0.00206755	5.7903e-05	0.0173573	++	0.387601	0.000897813	0.0439429	0.199062	++	0.390275	0.000283284	0.114431	0.311737	++	0.481053	0.00269463	0.000262207	0.328323	++	0.491375	0.00153504	0.0367225	0.385606	++
cg11368643	5	140625059	PCDHB15	TSS200	N_Shore	0.0746255	0.000458187	0.00565059	0.0232593	0.237447	0.00197754	0.000208939	0.0391286	++	0.0767234	0.000851158	0.0148438	0.0922964	++	0.0728588	0.000222439	0.254224	0.519706	++	0.230034	0.00210717	0.0297818	0.616039	++	0.240357	0.00196896	0.0055114	0.196457	++
cg26248075	6	100895481	SIM1	Body	N_Shore	0.0404982	0.000297945	0.0058284	0.0239004	0.223132	0.00164376	0.000299202	0.0484597	++	0.0402257	0.000119138	0.534087	0.802942	++	0.0407278	0.000361035	0.0217144	0.0879529	++	0.220184	0.00221771	0.0158931	0.586416	++	0.22429	0.000929352	0.0965039	0.5276	++
cg04309212	2	223183932	NA		Island	0.0279789	0.00013455	0.00637832	0.0258884	0.0452459	0.000407987	0.000301302	0.0486402	++	0.0278059	0.000156564	0.0875837	0.312267	++	0.0281246	0.000133818	0.0663808	0.210859	++	0.0459619	0.000342621	0.0244645	0.606069	++	0.0449649	0.000563864	0.000550309	0.0739011	++
cg13154880	4	48486472	SLC10A4	Body	Island	0.0397553	0.00015456	0.00646199	0.0261909	0.145768	0.00165855	8.92879e-06	0.00521689	++	0.0422719	0.000154691	0.149704	0.430185	++	0.0376361	0.000169674	0.0385495	0.139197	++	0.148347	0.00178199	0.00712486	0.535176	++	0.144756	0.00146112	0.00240719	0.141755	++
cg04730685	13	95360278	NA		S_Shore	0.0159878	4.95144e-05	0.0066749	0.0269513	0.293104	0.00195248	0.000300961	0.0486172	++	0.0167359	4.6857e-05	0.260516	0.58067	++	0.0153578	3.65334e-05	0.0936182	0.270983	++	0.283819	0.00281189	0.00115113	0.415828	++	0.296749	0.00145356	0.0520516	0.433135	++
cg00603274	11	61596626	FADS2	Body	Island	0.0213844	9.42919e-05	0.00684482	0.0275556	0.0512898	0.000797639	0.000194336	0.0375602	++	0.0226343	3.21629e-05	0.653177	0.868014	++	0.0203318	9.86055e-05	0.0200624	0.0825133	++	0.0455635	0.000594501	0.0299284	0.616991	++	0.0535374	0.00105378	0.000605394	0.0773499	++
cg05823605	7	45928133	IGFBP1	1stExon;5'UTR	Island	0.0353516	0.00011195	0.00688683	0.0277027	0.121092	0.00165486	1.16221e-05	0.00623318	++	0.0358986	5.20104e-05	0.519267	0.794182	++	0.034891	9.55363e-05	0.0557018	0.184959	++	0.113388	0.0019749	0.000667626	0.379927	++	0.124116	0.0017588	0.000726155	0.0841152	++
cg02530350	7	148036740	CNTNAP2	Body	Island	0.033878	0.000129514	0.00694781	0.0279194	0.107863	0.00116548	0.000307512	0.0490989	++	0.0353171	0.000280293	0.00898719	0.0635432	++	0.0326662	6.6928e-05	0.220192	0.477298	++	0.100182	0.00124331	0.00592971	0.5233	++	0.110878	0.00121816	0.00960844	0.242171	++
cg01956717	19	55866635	FAM71E2	3'UTR;TSS1500	S_Shore	0.0357326	-0.000153072	0.00701705	0.0281645	0.0385389	0.000504228	9.58556e-05	0.024264	-+	0.034992	-0.000214857	0.0417549	0.192272	--	0.0363562	-6.94742e-05	0.330728	0.60382	--	0.0378008	0.000569922	0.00683197	0.533838	++	0.0388286	0.00047453	0.00852389	0.232252	++
cg26704870	2	73144279	EMX1	TSS1500	Island	0.0288488	0.000112132	0.00705259	0.028289	0.173459	0.00133238	9.53331e-05	0.0242012	++	0.030051	0.000209485	0.000896945	0.0106261	++	0.0278365	7.70514e-05	0.200676	0.450861	++	0.167592	0.00127523	0.0271719	0.612265	++	0.175762	0.0015003	0.00146782	0.115389	++
cg20040743	8	91803792	NECAB1	TSS200	Island	0.0294726	0.000141243	0.00730997	0.029194	0.123448	0.00144991	5.1589e-06	0.00361158	++	0.0321922	0.000406585	0.000238142	0.00371112	++	0.0271825	6.97743e-05	0.241292	0.503922	++	0.111235	0.00179626	0.000115692	0.240172	++	0.128242	0.00139932	0.001804	0.126268	++
cg26112929	7	5821500	RNF216	TSS1500;TSS1500	S_Shore	0.0796778	0.000273477	0.00734041	0.0292982	0.144693	0.00109036	0.000118383	0.0279443	++	0.0813087	-1.56308e-05	0.925968	0.976743	+-	0.0783044	0.000326405	0.0293077	0.111966	++	0.148502	0.00108688	0.0293196	0.615849	++	0.143198	0.00127942	0.00041867	0.0655017	++
cg08601357	20	21504446	NA		S_Shore	0.0388957	0.000180438	0.00757981	0.0301359	0.0745288	0.00093461	7.38608e-05	0.0205067	++	0.0387658	0.00025862	0.0390604	0.183618	++	0.0390052	0.00014014	0.128933	0.338283	++	0.0677073	0.000816893	0.0183827	0.591282	++	0.0772064	0.000994723	0.00277133	0.149904	++
cg15916646	7	27225127	HOXA11AS	Body;TSS1500	Island	0.0799362	0.000336536	0.0080086	0.0316291	0.308369	0.00148755	0.000215801	0.0399446	++	0.0806054	0.000164129	0.476837	0.767062	++	0.0793726	0.000606428	0.000440456	0.00311658	++	0.303876	0.00189536	0.010814	0.560708	++	0.310132	0.00113146	0.0309707	0.363849	++
cg23718606	6	27219812	PRSS16	Body	Island	0.0832018	0.000233655	0.00808229	0.0318787	0.18531	0.00136013	1.40559e-05	0.00715736	++	0.0840684	0.00015227	0.45545	0.752279	++	0.082472	0.000315261	0.00155113	0.0093833	++	0.183525	0.00128487	0.0316455	0.621078	++	0.186011	0.00174516	1.81564e-05	0.0114032	++
cg26435572	7	27223682	HOXA11AS	TSS1500;Body	N_Shore	0.0162487	4.06538e-05	0.00819669	0.0322745	0.0808737	0.00140625	6.01125e-06	0.00402853	++	0.0162388	6.80161e-05	0.0583539	0.240656	++	0.016257	4.63063e-05	0.0171636	0.0725871	++	0.0777995	0.00112087	0.0137791	0.57821	++	0.0820804	0.00133294	0.00221732	0.137033	++
cg04304705	22	48884960	FAM19A5	TSS1500	Island	0.030366	0.00014085	0.0086113	0.0336925	0.183579	0.0020249	2.45114e-06	0.00207119	++	0.0307136	9.01616e-05	0.403144	0.713579	++	0.0300732	0.000200484	0.00287162	0.0159692	++	0.184441	0.00227085	0.00115448	0.415828	++	0.18324	0.00181333	0.00211152	0.134278	++
cg09478857	1	117664976	TRIM45	TSS1500;TSS1500	Island	0.0416231	0.000118321	0.00909877	0.0353397	0.0941154	0.000887545	8.28234e-05	0.0220669	++	0.0425794	9.34651e-05	0.29521	0.617994	++	0.0408177	0.000115728	0.0550331	0.183275	++	0.0900658	0.00123734	0.000496643	0.372581	++	0.095705	0.000697142	0.0237436	0.332241	++
cg03525049	8	75232650	JPH1	Body	Island	0.0258396	0.000110542	0.00919642	0.0356821	0.0760698	0.000940866	4.67201e-05	0.015289	++	0.0265504	0.000134755	0.15795	0.443566	++	0.025241	0.000110744	0.0197073	0.0813368	++	0.070636	0.000958056	0.010478	0.558296	++	0.0782027	0.00107519	0.000774347	0.0866267	++
cg24497836	15	48470678	MYEF2	TSS200	S_Shore	0.0398863	0.00013889	0.00996646	0.0382846	0.120597	0.00103539	1.33389e-05	0.00689244	++	0.0421094	0.000108279	0.324354	0.646146	++	0.0380142	0.00013999	0.048971	0.167588	++	0.121579	0.000571153	0.167244	0.737147	++	0.120211	0.00136077	1.91736e-05	0.011768	++
cg24656271	5	140793358	PCDHGA4	Body;Body;Body;Body;Body;Body;Body;1stExon;Body;Body;1stExon;Body;Body;Body;Body;Body;Body	N_Shore	0.187651	0.000583213	0.0102204	0.0391371	0.361502	0.00186499	0.000171676	0.0347792	++	0.182868	0.00112606	0.018462	0.108336	++	0.191679	0.000308183	0.267787	0.535607	++	0.371106	0.00234428	0.0080219	0.541635	++	0.357732	0.0014335	0.0311978	0.364602	++
cg23517605	6	3228365	TUBB2B	TSS1500	Island	0.022112	8.61093e-05	0.0102878	0.0393606	0.128562	0.00113585	3.87166e-06	0.0029211	++	0.0231079	1.47069e-05	0.832783	0.944558	++	0.0212733	9.77023e-05	0.0217745	0.0881414	++	0.123172	0.00133112	0.000760575	0.392473	++	0.130677	0.00116545	0.000709942	0.0831086	++
cg10717463	18	76740962	SALL3	Body	Island	0.0292194	0.000106035	0.010297	0.039391	0.127053	0.00155303	0.000254778	0.0439053	++	0.0299888	0.000175742	0.00404269	0.0344362	++	0.0285715	5.84815e-05	0.365456	0.637296	++	0.119248	0.00196	0.00169403	0.44293	++	0.130116	0.00138461	0.0218181	0.322074	++
cg22995692	5	141263164	NA		Island	0.0265746	7.38017e-05	0.0106376	0.0405178	0.185956	0.00202427	9.15076e-06	0.00530874	++	0.0272875	0.000132079	0.0277405	0.144525	++	0.0259743	2.90776e-05	0.431031	0.694323	++	0.178762	0.00179042	0.0134603	0.576599	++	0.18878	0.00253322	6.45201e-05	0.0245069	++
cg09984392	8	126011784	SQLE	1stExon	S_Shore	0.0188475	6.87529e-05	0.0109313	0.0414782	0.144579	0.00151798	6.32595e-05	0.0183498	++	0.019408	4.81919e-05	0.224139	0.53697	++	0.0183755	6.744e-05	0.120409	0.322792	++	0.14005	0.0017157	0.00824004	0.543505	++	0.146356	0.00137838	0.00769798	0.223397	++
cg16747109	4	111544463	PITX2	TSS1500;Body;Body	Island	0.0254729	8.67126e-05	0.0110398	0.0418297	0.138169	0.00139275	0.000158905	0.0331874	++	0.0264628	0.0001665	0.0181391	0.106941	++	0.0246393	5.65265e-05	0.187915	0.432676	++	0.132957	0.00142134	0.0498355	0.645238	++	0.140214	0.00157567	0.000712547	0.0833113	++
cg10757065	2	223165891	CCDC140	5'UTR	N_Shore	0.0316438	8.95642e-05	0.0113402	0.0428175	0.0755184	0.000789069	0.000229057	0.0413613	++	0.0317385	3.52003e-05	0.597704	0.839835	++	0.0315641	0.000118954	0.0117249	0.0528939	++	0.0735304	0.000964281	0.0195274	0.5962	++	0.0762988	0.000861964	0.00135867	0.111821	++
cg14305560	9	139487958	NA		OpenSea	0.95716	0.00037749	0.0117206	0.0440674	0.963075	-0.000626326	0.000108669	0.026351	+-	0.953346	0.000498795	0.216493	0.527056	++	0.960372	0.000266878	0.013039	0.0578173	++	0.964983	-0.000549524	0.0127627	0.573244	--	0.962327	-0.000747448	0.00150613	0.116541	--
cg08441530	11	134025433	NCAPD3	Body	OpenSea	0.970071	-0.000191921	0.0117444	0.0441441	0.988657	-0.00020653	7.52433e-05	0.0207751	--	0.970683	-0.000189354	0.211084	0.519948	--	0.969555	-0.000243158	0.0112019	0.0509283	--	0.988875	-8.9654e-05	0.263175	0.78702	--	0.988571	-0.000289014	0.000104933	0.0324566	--
cg10281977	14	105070864	TMEM179	1stExon	Island	0.0350637	9.46862e-05	0.012078	0.0452202	0.0892587	0.00117506	0.000230562	0.0414284	++	0.0360322	-2.29657e-06	0.976772	0.992911	+-	0.0342482	0.000126654	0.00500006	0.0256848	++	0.0848179	0.00120179	0.0182577	0.591282	++	0.0910018	0.00118852	0.006036	0.203151	++
cg01693650	3	45883855	LZTFL1	TSS1500	Island	0.0211031	-7.29198e-05	0.0125834	0.0468324	0.0729756	0.0012815	5.22317e-06	0.0036326	-+	0.0211798	-0.000112584	0.0526868	0.224926	--	0.0210384	-5.42714e-05	0.152815	0.379155	--	0.0774842	0.0011911	0.0280264	0.613346	++	0.0712058	0.00153669	3.06528e-05	0.0158627	++
cg21166964	5	72529816	NA		Island	0.0700641	0.000192531	0.0129259	0.0479292	0.174209	0.00127068	4.88668e-05	0.015715	++	0.0723081	0.000137662	0.345595	0.665794	++	0.0681744	0.000258229	0.0177779	0.0747399	++	0.171367	0.00127723	0.0118188	0.566922	++	0.175324	0.00122895	0.00474667	0.185635	++
cg02524946	7	35294640	TBX20	TSS1500;TSS1500	Island	0.0324926	0.000161733	0.012989	0.0481345	0.144267	0.00150581	8.83109e-05	0.0230033	++	0.0338795	0.00030409	0.0437652	0.1985	++	0.0313248	9.779e-05	0.1871	0.431534	++	0.138678	0.00156982	0.0105852	0.559696	++	0.146461	0.000962874	0.0534164	0.436874	++
cg08310866	17	21281163	KCNJ12	5'UTR	Island	0.0383052	0.000123298	0.0130656	0.0483806	0.101843	0.0013052	7.70785e-05	0.0211152	++	0.0387857	8.8376e-05	0.348692	0.668481	++	0.0379005	0.000133916	0.0243569	0.0966001	++	0.101636	0.000346465	0.508739	0.884849	++	0.101925	0.00195052	2.01835e-05	0.0121257	++
cg05725804	5	114516219	TRIM36	1stExon;1stExon;1stExon;5'UTR;5'UTR;5'UTR	Island	0.0271598	0.000134665	0.0132093	0.0488334	0.0893041	0.000981605	0.000146052	0.0316167	++	0.0284213	0.000306788	0.00756386	0.0558358	++	0.0260975	9.6732e-05	0.149814	0.374221	++	0.0898437	0.00123266	0.0254046	0.607795	++	0.0890923	0.0010015	0.00142358	0.11396	++
cg06385324	16	2014621	SNHG9	TSS1500;TSS1500;Body	Island	0.0152747	-8.6435e-05	0.0133807	0.0493859	0.0768965	0.00128189	3.44736e-07	0.000490235	-+	0.0152658	-0.000114799	0.158486	0.444456	--	0.0152822	-8.76973e-05	0.0259041	0.101497	--	0.0855686	0.000457966	0.289085	0.798552	++	0.0734926	0.00190063	1.05293e-08	7.83704e-05	++
cg18372607	11	31827084	PAX6	Body;Body;Body	N_Shore	0.0639712	0.000637742	0.0134574	0.0496322	0.0973705	0.00109383	0.000307719	0.0491095	++	0.0673199	0.000752975	0.0792747	0.293226	++	0.0611512	0.000703048	0.0598799	0.195289	++	0.0972772	0.000631607	0.192366	0.751364	++	0.0974071	0.00154088	0.000271078	0.0527126	++
cg14577472	20	42295538	MYBL2	TSS200	Island	0.0184038	0.000138517	0.0135306	0.0498606	0.0209743	0.000295752	7.45573e-06	0.00464921	++	0.0192987	0.000314453	0.0401746	0.187184	++	0.0176502	5.41366e-05	0.0430391	0.151716	++	0.0212908	6.72282e-05	0.469293	0.871675	++	0.02085	0.000469774	6.32782e-07	0.00124362	++
cg17906267	1	95582329	TMEM56	TSS1500	N_Shore	0.0572821	0.000221034	0.0135349	0.0498753	0.088673	0.000950199	3.32635e-05	0.0122618	++	0.0583015	7.78189e-05	0.673475	0.877871	++	0.0564236	0.000277676	0.0154585	0.0666056	++	0.0888721	0.00100409	0.0311314	0.61987	++	0.0885948	0.00115167	7.06553e-05	0.0256778	++
Total of effect estimates in same direction: "++":														210					213					219					230					230
Total of effect estimates in same direction: "--":														5					25					25					13					14
