# Supplementary material for: DNA methylation perturbations may link altered development and aging in the lung
Source: Aging (Albany NY). 2021 Jan 19;13(2):1742–64. doi: 10.18632/aging.202544 (PMC7880367; doi:10.18632/aging.202544)
Supplement: Supplementary Table 4 [file aging-13-202544-s005.xlsx]

## Sheet: Sheet1
Supplementary Table 4. Overlapping age-associated differentially methylated positions (aDMPs) with previously published lung tissue methylation quantitative trait loci (mQTLs) in cis (67 unique CpGs annotated to 44 unique genes, line 2) and trans (17 unique CpGs annotated to nine unique genes, line 1915).
Overlap with cis-mQTLs:
CG_site	site.chr	site.pos	site.symbol	SNP	SNP.chr	SNP.pos	t-statistic	beta	pvalue	FDR
cg00603274	11	61596626	FADS2	rs968567:61595564:C:T	chr11	61595564	9.31801	0.0193106	1.66e-15	3.72e-12
cg00603274	11	61596626	FADS2	rs61897793	chr11	61599347	9.22337	0.0188995	2.71e-15	5.83e-12
cg00603274	11	61596626	FADS2	rs7943728:61547068:G:A	chr11	61547068	9.08718	0.0193961	5.52e-15	1.13e-11
cg00603274	11	61596626	FADS2	rs61896141:61556039:A:C	chr11	61556039	9.01219	0.0190898	8.16e-15	1.62e-11
cg00603274	11	61596626	FADS2	rs61897795	chr11	61618169	8.3852	0.0194991	2.1e-13	3.28e-10
cg02225085	5	87975992	LINC00461	rs34483452:87986314:C:A	chr5	87986314	7.61746	0.0316007	1.05e-11	1.21e-08
cg02225085	5	87975992	LINC00461	rs7733438:87986284:T:G	chr5	87986284	7.61788	0.0316017	1.05e-11	1.21e-08
cg02225085	5	87975992	LINC00461	rs26582	chr5	87950290	7.48968	0.0247012	1.99e-11	2.19e-08
cg02225085	5	87975992	LINC00461	rs27774:87959033:G:A	chr5	87959033	7.48968	0.0247012	1.99e-11	2.19e-08
cg02225085	5	87975992	LINC00461	rs10070734:87940026:T:C	chr5	87940026	-7.48529	-0.0247139	2.04e-11	2.23e-08
cg02225085	5	87975992	LINC00461	rs1477290	chr5	87988934	7.39285	0.0309311	3.24e-11	3.4e-08
cg02225085	5	87975992	LINC00461	rs2304607	chr5	87988733	7.39285	0.0309311	3.24e-11	3.4e-08
cg02225085	5	87975992	LINC00461	rs13173305:87945377:A:G	chr5	87945377	7.3626	0.0309278	3.76e-11	3.9e-08
cg02225085	5	87975992	LINC00461	rs1501672	chr5	87963761	7.3626	0.0309278	3.76e-11	3.9e-08
cg02225085	5	87975992	LINC00461	rs13174131	chr5	87959538	7.3626	0.0309278	3.76e-11	3.9e-08
cg02225085	5	87975992	LINC00461	rs1501673	chr5	87963600	7.3626	0.0309278	3.76e-11	3.9e-08
cg02225085	5	87975992	LINC00461	rs13162708:87943345:C:T	chr5	87943345	7.36273	0.0309309	3.76e-11	3.9e-08
cg02225085	5	87975992	LINC00461	rs35991856:87968347:C:A	chr5	87968347	7.36134	0.0309282	3.79e-11	3.93e-08
cg02225085	5	87975992	LINC00461	rs7703782:87938557:T:A	chr5	87938557	7.36057	0.0309881	3.8e-11	3.94e-08
cg02225085	5	87975992	LINC00461	rs7721099:87936379:T:C	chr5	87936379	7.35875	0.0310126	3.84e-11	3.97e-08
cg02225085	5	87975992	LINC00461	rs1846974:87969927:G:A	chr5	87969927	7.35837	0.0309287	3.84e-11	3.98e-08
cg02225085	5	87975992	LINC00461	rs112862634:87970352:G:C	chr5	87970352	7.35707	0.0309288	3.87e-11	4e-08
cg02225085	5	87975992	LINC00461	rs16903285:87978252:T:C	chr5	87978252	7.32442	0.0309047	4.55e-11	4.65e-08
cg02225085	5	87975992	LINC00461	rs12655172:88010829:C:T	chr5	88010829	7.14094	0.0304461	1.13e-10	1.07e-07
cg00603274	11	61596626	FADS2	rs174596:61620734:T:C	chr11	61620734	7.08691	0.0161039	1.48e-10	1.37e-07
cg02225085	5	87975992	LINC00461	5:87969929:T:A	chr5	87969929	7.07592	0.029905	1.56e-10	1.44e-07
cg02225085	5	87975992	LINC00461	5:87969937:T:C	chr5	87969937	7.07592	0.029905	1.56e-10	1.44e-07
cg00603274	11	61596626	FADS2	rs174597:61621040:G:C	chr11	61621040	6.97845	0.0158616	2.52e-10	2.22e-07
cg02225085	5	87975992	LINC00461	rs2161228	chr5	88001798	6.95834	0.0310442	2.78e-10	2.43e-07
cg23779890	8	75262522	GDAP1	rs12545112:75288794:T:C	chr8	75288794	6.87491	0.0166085	4.18e-10	3.52e-07
cg00603274	11	61596626	FADS2	rs174591:61617676:T:A	chr11	61617676	6.85954	0.0149062	4.5e-10	3.77e-07
cg26726141	17	64612159	PRKCA	rs17686425	chr17	64612204	6.79984	0.0261635	6.02e-10	4.91e-07
cg02225085	5	87975992	LINC00461	rs10514301:87939654:C:T	chr5	87939654	6.75638	0.029418	7.43e-10	5.95e-07
cg07758738	18	12911528	NA	rs4797714:12899026:A:G	chr18	12899026	-6.71458	-0.0332795	9.1e-10	7.16e-07
cg07758738	18	12911528	NA	rs3915012	chr18	12899342	-6.71289	-0.0332614	9.18e-10	7.21e-07
cg00603274	11	61596626	FADS2	rs174593:61618831:T:C	chr11	61618831	6.70658	0.0147707	9.46e-10	7.42e-07
cg00603274	11	61596626	FADS2	rs174572:61598288:C:T	chr11	61598288	6.63802	0.0137383	1.32e-09	1e-06
cg00603274	11	61596626	FADS2	rs174585:61611694:G:A	chr11	61611694	6.6344	0.0151802	1.34e-09	1.02e-06
cg00603274	11	61596626	FADS2	rs174573:61600327:G:A	chr11	61600327	6.63054	0.0136043	1.37e-09	1.03e-06
cg23779890	8	75262522	GDAP1	rs13254381:75269548:A:G	chr8	75269548	6.58183	0.0156563	1.73e-09	1.28e-06
cg23779890	8	75262522	GDAP1	rs13256983:75269564:T:C	chr8	75269564	6.58183	0.0156563	1.73e-09	1.28e-06
cg23779890	8	75262522	GDAP1	rs7846006:75271974:A:G	chr8	75271974	6.57594	0.0156077	1.77e-09	1.31e-06
cg00603274	11	61596626	FADS2	rs174589:61615803:C:G	chr11	61615803	6.57489	0.0157395	1.78e-09	1.32e-06
cg23779890	8	75262522	GDAP1	rs10096726	chr8	75271627	6.5707	0.015606	1.82e-09	1.34e-06
cg23779890	8	75262522	GDAP1	rs10093891	chr8	75271434	6.5707	0.015606	1.82e-09	1.34e-06
cg23779890	8	75262522	GDAP1	rs4410896:75270494:A:G	chr8	75270494	6.5707	0.015606	1.82e-09	1.34e-06
cg23779890	8	75262522	GDAP1	rs10504576:75266679:A:G	chr8	75266679	6.5707	0.015606	1.82e-09	1.34e-06
cg23779890	8	75262522	GDAP1	rs4310196:75272727:C:A	chr8	75272727	-6.5707	-0.0156059	1.82e-09	1.34e-06
cg23779890	8	75262522	GDAP1	rs12542469:75288798:G:A	chr8	75288798	6.55895	0.0160399	1.93e-09	1.41e-06
cg00603274	11	61596626	FADS2	rs174590:61616977:G:C	chr11	61616977	6.55066	0.0157223	2e-09	1.46e-06
cg00603274	11	61596626	FADS2	rs174587:61612830:C:T	chr11	61612830	6.54162	0.0155479	2.09e-09	1.52e-06
cg23779890	8	75262522	GDAP1	rs62524065:75260467:A:T	chr8	75260467	6.53097	0.0156746	2.2e-09	1.59e-06
cg23779890	8	75262522	GDAP1	rs13269312	chr8	75266189	6.52924	0.0156704	2.22e-09	1.6e-06
cg23779890	8	75262522	GDAP1	rs7843391:75259023:G:A	chr8	75259023	6.52924	0.0156704	2.22e-09	1.6e-06
cg23779890	8	75262522	GDAP1	rs9298238:75267618:A:G	chr8	75267618	6.52924	0.0156704	2.22e-09	1.6e-06
cg00603274	11	61596626	FADS2	rs93923:61613745:C:T	chr11	61613745	6.51927	0.0155285	2.33e-09	1.68e-06
cg23779890	8	75262522	GDAP1	rs13277749	chr8	75266712	6.51267	0.0159407	2.4e-09	1.72e-06
cg23779890	8	75262522	GDAP1	rs7842662	chr8	75279647	6.51267	0.0159407	2.4e-09	1.72e-06
cg23779890	8	75262522	GDAP1	rs12545409:75263152:C:A	chr8	75263152	6.51153	0.0159431	2.42e-09	1.73e-06
cg23779890	8	75262522	GDAP1	rs6992221:75261861:A:G	chr8	75261861	6.50906	0.0159386	2.44e-09	1.75e-06
cg23779890	8	75262522	GDAP1	rs10090060:75257608:A:G	chr8	75257608	6.50522	0.0159366	2.49e-09	1.78e-06
cg23779890	8	75262522	GDAP1	rs149652154:75286031:G:A	chr8	75286031	6.48598	0.0157003	2.73e-09	1.94e-06
cg00603274	11	61596626	FADS2	rs174582	chr11	61607168	6.46521	0.0144678	3.01e-09	2.12e-06
cg23779890	8	75262522	GDAP1	rs12544032:75291115:G:A	chr8	75291115	6.43548	0.0156789	3.47e-09	2.41e-06
cg23779890	8	75262522	GDAP1	rs4492365:75272019:G:A	chr8	75272019	-6.40451	-0.0153879	4.02e-09	2.75e-06
cg00603274	11	61596626	FADS2	rs174579:61605613:C:T	chr11	61605613	6.37197	0.014205	4.69e-09	3.16e-06
cg23779890	8	75262522	GDAP1	rs6472845:75314911:A:G	chr8	75314911	6.32434	0.0152715	5.88e-09	3.88e-06
cg02225085	5	87975992	LINC00461	rs35267052:87949118:T:G	chr5	87949118	6.31734	0.0296774	6.08e-09	3.99e-06
cg14535884	9	117349621	ATP6V1G1	rs10982317	chr9	117349653	-6.28493	-0.0465785	7.08e-09	4.58e-06
cg23779890	8	75262522	GDAP1	rs7819969:75316243:C:A	chr8	75316243	-6.27974	-0.0151041	7.26e-09	4.68e-06
cg23779890	8	75262522	GDAP1	rs7819394:75315857:A:G	chr8	75315857	-6.27988	-0.0151044	7.25e-09	4.68e-06
cg23779890	8	75262522	GDAP1	rs141149852:75312672:T:G	chr8	75312672	-6.27879	-0.0151033	7.29e-09	4.7e-06
cg07758738	18	12911528	NA	rs3848468:12898367:A:G	chr18	12898367	-6.27741	-0.031845	7.34e-09	4.73e-06
cg23779890	8	75262522	GDAP1	rs6996971	chr8	75292492	6.27693	0.015101	7.35e-09	4.74e-06
cg23779890	8	75262522	GDAP1	rs67169113:75295334:T:A	chr8	75295334	-6.27693	-0.015101	7.35e-09	4.74e-06
cg23779890	8	75262522	GDAP1	rs10283076	chr8	75307831	6.27693	0.015101	7.35e-09	4.74e-06
cg07758738	18	12911528	NA	rs3961010:12901201:C:A	chr18	12901201	-6.27309	-0.0317941	7.49e-09	4.82e-06
cg07758738	18	12911528	NA	rs3927252:12900952:A:T	chr18	12900952	-6.27309	-0.0317941	7.49e-09	4.82e-06
cg09477019	16	56681945	NA	rs9922957:56672380:C:G	chr16	56672380	-6.26932	-0.0544976	7.62e-09	4.89e-06
cg23779890	8	75262522	GDAP1	rs10957713:75304218:A:C	chr8	75304218	6.26619	0.0155663	7.74e-09	4.96e-06
cg23779890	8	75262522	GDAP1	rs10957712:75304152:C:T	chr8	75304152	6.26606	0.015566	7.74e-09	4.96e-06
cg00603274	11	61596626	FADS2	rs174595:61619893:C:T	chr11	61619893	6.26334	0.0150975	7.84e-09	5.02e-06
cg23779890	8	75262522	GDAP1	rs4567029:75293712:T:C	chr8	75293712	6.26219	0.0150911	7.88e-09	5.04e-06
cg09477019	16	56681945	NA	rs13331433:56679799:A:G	chr16	56679799	-6.25972	-0.0547991	7.97e-09	5.1e-06
cg14535884	9	117349621	ATP6V1G1	rs10982315:117342964:A:G	chr9	117342964	-6.25541	-0.0469052	8.14e-09	5.19e-06
cg09477019	16	56681945	NA	rs1610211:56680357:T:C	chr16	56680357	-6.25409	-0.0545916	8.19e-09	5.22e-06
cg09477019	16	56681945	NA	rs12932184:56681588:G:A	chr16	56681588	-6.25362	-0.0546009	8.21e-09	5.23e-06
cg09477019	16	56681945	NA	rs1610214:56675888:T:A	chr16	56675888	-6.25362	-0.0546009	8.21e-09	5.23e-06
cg09477019	16	56681945	NA	rs8052394:56673828:A:G	chr16	56673828	-6.25362	-0.0546009	8.21e-09	5.23e-06
cg09477019	16	56681945	NA	rs35346959:56671867:A:G	chr16	56671867	-6.25362	-0.0546009	8.21e-09	5.23e-06
cg09477019	16	56681945	NA	rs7190725	chr16	56673290	-6.25362	-0.0546009	8.21e-09	5.23e-06
cg09477019	16	56681945	NA	rs8049883	chr16	56673410	-6.25362	-0.0546009	8.21e-09	5.23e-06
cg09477019	16	56681945	NA	rs66750274:56674278:A:C	chr16	56674278	-6.25362	-0.0546009	8.21e-09	5.23e-06
cg09477019	16	56681945	NA	rs8056289:56673496:T:C	chr16	56673496	-6.25362	-0.0546009	8.21e-09	5.23e-06
cg09477019	16	56681945	NA	rs9926746:56668551:C:T	chr16	56668551	-6.25362	-0.0546009	8.21e-09	5.23e-06
cg09477019	16	56681945	NA	rs9922409:56672400:G:A	chr16	56672400	-6.25362	-0.0546009	8.21e-09	5.23e-06
cg09477019	16	56681945	NA	rs7201401:56670461:T:A	chr16	56670461	-6.25362	-0.0546009	8.21e-09	5.23e-06
cg23779890	8	75262522	GDAP1	rs13265191:75316563:A:G	chr8	75316563	6.2464	0.0151713	8.49e-09	5.39e-06
cg23779890	8	75262522	GDAP1	rs13265662:75316530:G:A	chr8	75316530	6.2464	0.0151713	8.49e-09	5.39e-06
cg23779890	8	75262522	GDAP1	rs11997090:75317223:A:C	chr8	75317223	6.24668	0.0151718	8.48e-09	5.39e-06
cg23779890	8	75262522	GDAP1	rs4367527:75316993:T:C	chr8	75316993	6.24656	0.0151716	8.48e-09	5.39e-06
cg05725804	5	114516219	TRIM36	rs2278696	chr5	114516230	-6.24576	-0.0158627	8.52e-09	5.4e-06
cg23779890	8	75262522	GDAP1	rs7813869:75314547:A:T	chr8	75314547	6.24555	0.0151708	8.52e-09	5.41e-06
cg23779890	8	75262522	GDAP1	rs7814432:75314776:C:T	chr8	75314776	6.24574	0.015171	8.52e-09	5.41e-06
cg23779890	8	75262522	GDAP1	rs188443406:75313149:A:C	chr8	75313149	6.24479	0.0151701	8.55e-09	5.43e-06
cg23779890	8	75262522	GDAP1	rs149267928:75313407:C:T	chr8	75313407	6.24489	0.0151702	8.55e-09	5.43e-06
cg23779890	8	75262522	GDAP1	rs7835220:75312205:G:C	chr8	75312205	6.24446	0.0151699	8.57e-09	5.43e-06
cg23779890	8	75262522	GDAP1	rs200066597:75311695:T:C	chr8	75311695	6.24418	0.0151696	8.58e-09	5.44e-06
cg23779890	8	75262522	GDAP1	rs7825334:75310411:A:G	chr8	75310411	6.24365	0.0151691	8.6e-09	5.45e-06
cg23779890	8	75262522	GDAP1	rs77895697:75311277:G:A	chr8	75311277	6.24388	0.0151693	8.59e-09	5.45e-06
cg23779890	8	75262522	GDAP1	rs142805122:75309631:G:A	chr8	75309631	6.24315	0.0151686	8.62e-09	5.46e-06
cg23779890	8	75262522	GDAP1	rs10108295:75301253:T:G	chr8	75301253	6.23626	0.0151606	8.9e-09	5.63e-06
cg23779890	8	75262522	GDAP1	rs143666788:75299270:C:G	chr8	75299270	6.23583	0.0151601	8.92e-09	5.64e-06
cg23779890	8	75262522	GDAP1	rs7813767	chr8	75297342	6.23529	0.0151594	8.94e-09	5.65e-06
cg23779890	8	75262522	GDAP1	rs4305896:75298201:A:G	chr8	75298201	6.23551	0.0151597	8.94e-09	5.65e-06
cg23779890	8	75262522	GDAP1	rs12546775:75295333:C:G	chr8	75295333	6.23529	0.0151594	8.94e-09	5.65e-06
cg23779890	8	75262522	GDAP1	rs4469448:75295110:G:C	chr8	75295110	6.23529	0.0151594	8.94e-09	5.65e-06
cg23779890	8	75262522	GDAP1	rs10098296:75297062:C:G	chr8	75297062	6.23529	0.0151594	8.94e-09	5.65e-06
cg23779890	8	75262522	GDAP1	rs10957716:75319519:G:A	chr8	75319519	6.22712	0.0154255	9.29e-09	5.85e-06
cg23779890	8	75262522	GDAP1	rs10957717:75320003:A:G	chr8	75320003	6.22716	0.0154254	9.29e-09	5.85e-06
cg00603274	11	61596626	FADS2	rs174575:61602003:C:G	chr11	61602003	6.22614	0.0131654	9.34e-09	5.87e-06
cg23779890	8	75262522	GDAP1	rs10957715:75318259:G:A	chr8	75318259	6.22622	0.0154241	9.33e-09	5.87e-06
cg02225085	5	87975992	LINC00461	rs6893807:87965021:A:G	chr5	87965021	6.2257	0.0259593	9.36e-09	5.88e-06
cg02225085	5	87975992	LINC00461	rs3814424	chr5	87968953	6.2259	0.0259594	9.35e-09	5.88e-06
cg02225085	5	87975992	LINC00461	rs2304608:87962298:C:A	chr5	87962298	6.2259	0.0259594	9.35e-09	5.88e-06
cg02225085	5	87975992	LINC00461	rs16903275	chr5	87950543	6.2259	0.0259594	9.35e-09	5.88e-06
cg02225085	5	87975992	LINC00461	rs1422191:87949158:G:A	chr5	87949158	6.2259	0.0259594	9.35e-09	5.88e-06
cg02225085	5	87975992	LINC00461	rs13163173:87943620:C:A	chr5	87943620	6.2259	0.0259594	9.35e-09	5.88e-06
cg02225085	5	87975992	LINC00461	rs1422192:87959023:G:A	chr5	87959023	6.2259	0.0259594	9.35e-09	5.88e-06
cg02225085	5	87975992	LINC00461	rs13163336	chr5	87943710	6.2259	0.0259594	9.35e-09	5.88e-06
cg02225085	5	87975992	LINC00461	rs13166120:87948883:G:A	chr5	87948883	6.2259	0.0259594	9.35e-09	5.88e-06
cg23779890	8	75262522	GDAP1	rs6472846:75315146:G:C	chr8	75315146	6.22428	0.015421	9.42e-09	5.92e-06
cg23779890	8	75262522	GDAP1	rs7814378:75314571:G:T	chr8	75314571	6.22393	0.0154205	9.43e-09	5.93e-06
cg23779890	8	75262522	GDAP1	rs10110715:75314250:T:C	chr8	75314250	6.22369	0.0154201	9.45e-09	5.93e-06
cg23779890	8	75262522	GDAP1	rs141742859:75313818:C:G	chr8	75313818	6.22334	0.0154196	9.46e-09	5.94e-06
cg14535884	9	117349621	ATP6V1G1	rs7854803:117339393:T:C	chr9	117339393	-6.22289	-0.0469321	9.48e-09	5.95e-06
cg23779890	8	75262522	GDAP1	rs78103255:75311331:A:G	chr8	75311331	6.22171	0.0154172	9.53e-09	5.99e-06
cg23779890	8	75262522	GDAP1	rs10109451:75305314:G:T	chr8	75305314	6.21358	0.0154042	9.9e-09	6.19e-06
cg23779890	8	75262522	GDAP1	rs13264285:75300598:A:C	chr8	75300598	6.21214	0.0154018	9.97e-09	6.23e-06
cg23779890	8	75262522	GDAP1	rs10093087:75301149:A:G	chr8	75301149	6.21227	0.015402	9.96e-09	6.23e-06
cg23779890	8	75262522	GDAP1	rs12548680:75294295:T:C	chr8	75294295	6.21108	0.0154	1e-08	6.26e-06
cg23779890	8	75262522	GDAP1	rs4339639:75294108:G:T	chr8	75294108	6.21108	0.0154	1e-08	6.26e-06
cg23779890	8	75262522	GDAP1	rs4471028	chr8	75294975	6.21108	0.0154	1e-08	6.26e-06
cg23779890	8	75262522	GDAP1	rs6997725:75292764:G:C	chr8	75292764	6.21034	0.0152023	1.01e-08	6.28e-06
cg23779890	8	75262522	GDAP1	rs148100606:75299787:G:C	chr8	75299787	6.20541	0.0154004	1.03e-08	6.41e-06
cg23779890	8	75262522	GDAP1	rs6996800:75322485:C:T	chr8	75322485	6.14864	0.0144534	1.34e-08	8.15e-06
cg23779890	8	75262522	GDAP1	rs9774363:75323114:G:A	chr8	75323114	-6.1485	-0.0144527	1.34e-08	8.16e-06
cg23779890	8	75262522	GDAP1	rs62524089:75323556:T:C	chr8	75323556	-6.14858	-0.0144525	1.34e-08	8.16e-06
cg14535884	9	117349621	ATP6V1G1	rs12236314:117333339:T:A	chr9	117333339	-6.13195	-0.0468097	1.45e-08	8.75e-06
cg23779890	8	75262522	GDAP1	rs12548001:75326619:G:A	chr8	75326619	6.12626	0.0148536	1.49e-08	8.96e-06
cg23779890	8	75262522	GDAP1	rs13261436:75325250:T:C	chr8	75325250	6.11416	0.0145016	1.58e-08	9.43e-06
cg23779890	8	75262522	GDAP1	rs73689106	chr8	75275021	6.05764	0.0146806	2.05e-08	1.19e-05
cg05725804	5	114516219	TRIM36	rs2278697:114516290:G:T	chr5	114516290	-6.03124	-0.0156583	2.32e-08	1.33e-05
cg23779890	8	75262522	GDAP1	rs3780014:75272287:T:C	chr8	75272287	6.03039	0.0150454	2.32e-08	1.33e-05
cg02225085	5	87975992	LINC00461	rs10514303	chr5	88045029	-6.02967	-0.028553	2.33e-08	1.34e-05
cg23779890	8	75262522	GDAP1	rs10092584:75291453:T:C	chr8	75291453	6.00308	0.0154645	2.64e-08	1.49e-05
cg23779890	8	75262522	GDAP1	rs147369996:75313492:C:T	chr8	75313492	5.9579	0.0145774	3.25e-08	1.8e-05
cg02225085	5	87975992	LINC00461	rs16903340	chr5	88063940	5.91585	0.0247709	3.94e-08	2.14e-05
cg07758738	18	12911528	NA	rs12969232:12902631:G:C	chr18	12902631	-5.91309	-0.0298338	3.99e-08	2.17e-05
cg13696752	9	4662858	SPATA6L	rs12237170:4671659:C:G	chr9	4671659	5.91308	0.0310961	3.99e-08	2.17e-05
cg13696752	9	4662858	SPATA6L	rs10974724	chr9	4677454	5.91308	0.0310961	3.99e-08	2.17e-05
cg05725804	5	114516219	TRIM36	rs2278695:114515588:A:G	chr5	114515588	-5.90968	-0.0157968	4.05e-08	2.2e-05
cg02225085	5	87975992	LINC00461	rs141729694:87999371:C:T	chr5	87999371	5.89148	0.0294638	4.41e-08	2.37e-05
cg23779890	8	75262522	GDAP1	rs149163939:75309435:T:G	chr8	75309435	5.87329	0.015093	4.79e-08	2.55e-05
cg13696752	9	4662858	SPATA6L	rs9776157:4661019:A:G	chr9	4661019	5.86375	0.0212242	5e-08	2.65e-05
cg23779890	8	75262522	GDAP1	rs10957714:75305962:A:G	chr8	75305962	5.83359	0.0151052	5.74e-08	3e-05
cg09477019	16	56681945	NA	rs4784702:56674482:C:T	chr16	56674482	-5.80079	-0.02717	6.66e-08	3.43e-05
cg09477019	16	56681945	NA	rs12597886:56688889:A:G	chr16	56688889	-5.79523	-0.0555123	6.84e-08	3.51e-05
cg09477019	16	56681945	NA	rs11647171:56673249:T:C	chr16	56673249	5.74298	0.0265486	8.66e-08	4.33e-05
cg09477019	16	56681945	NA	rs11640851:56673227:C:A	chr16	56673227	5.74034	0.0265273	8.77e-08	4.38e-05
cg09477019	16	56681945	NA	rs904777:56674111:C:G	chr16	56674111	5.73998	0.0265252	8.78e-08	4.38e-05
cg09477019	16	56681945	NA	rs1599823	chr16	56675817	5.73962	0.0265232	8.8e-08	4.39e-05
cg09477019	16	56681945	NA	rs56125200:56675499:G:T	chr16	56675499	5.73962	0.0265232	8.8e-08	4.39e-05
cg09477019	16	56681945	NA	rs6499849:56687452:C:T	chr16	56687452	-5.73666	-0.0549962	8.91e-08	4.44e-05
cg09477019	16	56681945	NA	rs12927042:56684277:A:T	chr16	56684277	-5.73666	-0.0549962	8.91e-08	4.44e-05
cg09477019	16	56681945	NA	rs12600048:56688862:C:T	chr16	56688862	-5.73666	-0.0549962	8.91e-08	4.44e-05
cg09477019	16	56681945	NA	rs35264105:56681697:T:C	chr16	56681697	-5.73666	-0.0549962	8.91e-08	4.44e-05
cg09477019	16	56681945	NA	rs9932570:56663357:C:T	chr16	56663357	-5.73666	-0.0549962	8.91e-08	4.44e-05
cg09477019	16	56681945	NA	rs12926482:56684270:C:T	chr16	56684270	-5.73666	-0.0549962	8.91e-08	4.44e-05
cg09477019	16	56681945	NA	rs6499850:56687638:C:A	chr16	56687638	-5.73666	-0.0549962	8.91e-08	4.44e-05
cg09477019	16	56681945	NA	rs931711:56661177:C:A	chr16	56661177	-5.73666	-0.0549962	8.91e-08	4.44e-05
cg09477019	16	56681945	NA	rs12447004:56664143:C:T	chr16	56664143	-5.73666	-0.0549962	8.91e-08	4.44e-05
cg09477019	16	56681945	NA	rs8060203:56690364:A:G	chr16	56690364	-5.73666	-0.0549962	8.91e-08	4.44e-05
cg09477019	16	56681945	NA	rs12598354:56688768:T:C	chr16	56688768	-5.73666	-0.0549962	8.91e-08	4.44e-05
cg09477019	16	56681945	NA	rs7194982:56688000:C:T	chr16	56688000	-5.73666	-0.0549962	8.91e-08	4.44e-05
cg09477019	16	56681945	NA	rs7198427	chr16	56685080	-5.73666	-0.0549962	8.91e-08	4.44e-05
cg09477019	16	56681945	NA	rs8060024	chr16	56685304	-5.73666	-0.0549962	8.91e-08	4.44e-05
cg09477019	16	56681945	NA	rs78032789:56690147:A:C	chr16	56690147	-5.73666	-0.0549962	8.91e-08	4.44e-05
cg09477019	16	56681945	NA	rs2014584:56689684:C:A	chr16	56689684	-5.73666	-0.0549962	8.91e-08	4.44e-05
cg09477019	16	56681945	NA	rs75705444:56690100:A:T	chr16	56690100	-5.73666	-0.0549962	8.91e-08	4.44e-05
cg09477019	16	56681945	NA	rs7198217:56684952:C:T	chr16	56684952	-5.73666	-0.0549962	8.91e-08	4.44e-05
cg09477019	16	56681945	NA	rs7198368:56684989:C:T	chr16	56684989	-5.73666	-0.0549962	8.91e-08	4.44e-05
cg09477019	16	56681945	NA	rs6499848:56684953:G:T	chr16	56684953	-5.73666	-0.0549962	8.91e-08	4.44e-05
cg09477019	16	56681945	NA	rs708274	chr16	56660906	-5.73666	-0.0549962	8.91e-08	4.44e-05
cg09477019	16	56681945	NA	rs8044791	chr16	56690858	-5.73666	-0.0549962	8.91e-08	4.44e-05
cg09477019	16	56681945	NA	rs7189860:56683653:G:A	chr16	56683653	-5.73666	-0.0549962	8.91e-08	4.44e-05
cg09477019	16	56681945	NA	rs12934569:56684287:T:C	chr16	56684287	-5.73666	-0.0549962	8.91e-08	4.44e-05
cg09477019	16	56681945	NA	rs1811679:56689751:C:T	chr16	56689751	-5.73666	-0.0549962	8.91e-08	4.44e-05
cg09477019	16	56681945	NA	rs1875228	chr16	56698221	-5.73666	-0.0549962	8.91e-08	4.44e-05
cg09477019	16	56681945	NA	rs7200901:56689398:T:C	chr16	56689398	-5.73666	-0.0549962	8.91e-08	4.44e-05
cg09477019	16	56681945	NA	rs7193812:56689353:G:A	chr16	56689353	-5.73666	-0.0549962	8.91e-08	4.44e-05
cg09477019	16	56681945	NA	rs8059773:56690450:C:T	chr16	56690450	-5.73666	-0.0549962	8.91e-08	4.44e-05
cg09477019	16	56681945	NA	rs12708963:56695664:G:C	chr16	56695664	-5.72895	-0.0545858	9.23e-08	4.58e-05
cg07758738	18	12911528	NA	rs9962435:12908488:C:G	chr18	12908488	-5.7226	-0.0308766	9.5e-08	4.7e-05
cg07758738	18	12911528	NA	rs7242109:12905040:A:G	chr18	12905040	-5.72248	-0.0308748	9.5e-08	4.7e-05
cg02225085	5	87975992	LINC00461	rs77722618:88043572:C:T	chr5	88043572	5.71998	0.0242781	9.61e-08	4.75e-05
cg02225085	5	87975992	LINC00461	rs7718514:88041854:T:A	chr5	88041854	5.71998	0.0242781	9.61e-08	4.75e-05
cg02225085	5	87975992	LINC00461	rs1422189	chr5	88042019	5.71998	0.0242781	9.61e-08	4.75e-05
cg13696752	9	4662858	SPATA6L	rs404484:4659975:A:G	chr9	4659975	5.71809	0.0204775	9.69e-08	4.79e-05
cg13696752	9	4662858	SPATA6L	rs301487	chr9	4662369	5.71821	0.0205163	9.69e-08	4.79e-05
cg13696752	9	4662858	SPATA6L	rs1485202	chr9	4664749	5.71074	0.0299921	1e-07	4.93e-05
cg09477019	16	56681945	NA	rs2291956:56692218:C:T	chr16	56692218	-5.70525	-0.0521197	1.03e-07	5.04e-05
cg04801402	6	46138912	ENPP5	rs11754760:46075632:C:T	chr6	46075632	-5.68999	-0.0111134	1.1e-07	5.36e-05
cg26726141	17	64612159	PRKCA	rs17762314	chr17	64675899	5.69	0.0211845	1.1e-07	5.36e-05
cg04801402	6	46138912	ENPP5	rs13210366:46074005:C:A	chr6	46074005	-5.68457	-0.0111027	1.13e-07	5.48e-05
cg04427498	7	20830657	NA	rs11772090:20830754:A:G	chr7	20830754	5.66513	0.0285925	1.23e-07	5.92e-05
cg00603274	11	61596626	FADS2	rs174621:61630104:G:A	chr11	61630104	5.65714	0.0136752	1.28e-07	6.12e-05
cg04801402	6	46138912	ENPP5	rs10807334:46071116:G:A	chr6	46071116	-5.65662	-0.0110434	1.28e-07	6.13e-05
cg09477019	16	56681945	NA	rs931712	chr16	56661183	-5.64241	-0.0257464	1.36e-07	6.49e-05
cg07758738	18	12911528	NA	rs1983424:12912092:G:C	chr18	12912092	-5.63602	-0.0304347	1.4e-07	6.65e-05
cg09477019	16	56681945	NA	rs9673491:56668922:G:T	chr16	56668922	-5.62146	-0.0256589	1.5e-07	7.05e-05
cg09477019	16	56681945	NA	rs1827208:56666886:C:T	chr16	56666886	5.60887	0.0253111	1.58e-07	7.42e-05
cg09477019	16	56681945	NA	rs1827211:56668256:C:T	chr16	56668256	5.60809	0.0253086	1.59e-07	7.44e-05
cg00603274	11	61596626	FADS2	rs174622:61631927:G:A	chr11	61631927	5.60028	0.0135738	1.65e-07	7.68e-05
cg23598080	1	180204499	LHX4	rs355632:180207071:C:T	chr1	180207071	-5.5916	-0.0125874	1.71e-07	7.95e-05
cg14535884	9	117349621	ATP6V1G1	rs56221640:117332004:A:G	chr9	117332004	-5.58563	-0.0427785	1.76e-07	8.14e-05
cg09477019	16	56681945	NA	rs7196890:56671020:C:A	chr16	56671020	-5.57965	-0.0256233	1.8e-07	8.33e-05
cg09477019	16	56681945	NA	rs4094215:56670226:C:A	chr16	56670226	5.5794	0.0252986	1.81e-07	8.34e-05
cg00425710	16	56672671	MT1A	rs1846692	chr16	56671696	5.56784	0.0274328	1.9e-07	8.73e-05
cg09477019	16	56681945	NA	rs4784701:56670667:T:G	chr16	56670667	5.56479	0.0252609	1.93e-07	8.84e-05
cg09477019	16	56681945	NA	rs2270837:56667854:A:G	chr16	56667854	5.54943	0.044944	2.06e-07	9.4e-05
cg09477019	16	56681945	NA	rs1827210:56667282:C:A	chr16	56667282	5.54943	0.044944	2.06e-07	9.4e-05
cg14535884	9	117349621	ATP6V1G1	rs7025216:117330473:C:A	chr9	117330473	-5.54934	-0.0425642	2.07e-07	9.4e-05
cg23598080	1	180204499	LHX4	rs3842831:180206490:C:T	chr1	180206490	-5.52908	-0.0127031	2.26e-07	0.00010173
cg13696752	9	4662858	SPATA6L	rs4361810:4660294:T:C	chr9	4660294	5.52227	0.019814	2.33e-07	0.00010448
cg04801402	6	46138912	ENPP5	rs9367233	chr6	46069508	-5.52089	-0.0107148	2.34e-07	0.00010497
cg04801402	6	46138912	ENPP5	rs7759506:46068138:C:G	chr6	46068138	-5.52089	-0.0107148	2.34e-07	0.00010497
cg13696752	9	4662858	SPATA6L	rs4489371:4660269:G:A	chr9	4660269	5.52064	0.0198121	2.35e-07	0.00010506
cg09477019	16	56681945	NA	rs1827213	chr16	56671841	5.51295	0.0250704	2.43e-07	0.00010823
cg09477019	16	56681945	NA	rs76245170:56697994:G:C	chr16	56697994	-5.5045	-0.0535253	2.52e-07	0.00011178
cg23779890	8	75262522	GDAP1	rs6472847:75327897:G:A	chr8	75327897	5.50404	0.0133163	2.53e-07	0.00011199
cg23598080	1	180204499	LHX4	rs7551929:180204338:C:G	chr1	180204338	-5.50127	-0.0122764	2.56e-07	0.00011321
cg23598080	1	180204499	LHX4	rs11584346:180201124:C:T	chr1	180201124	-5.4972	-0.0122578	2.6e-07	0.00011503
cg04801402	6	46138912	ENPP5	rs2223777:46094541:C:G	chr6	46094541	-5.49106	-0.0109652	2.67e-07	0.00011785
cg04801402	6	46138912	ENPP5	rs2223778:46094538:A:C	chr6	46094538	-5.49106	-0.0109652	2.67e-07	0.00011785
cg04801402	6	46138912	ENPP5	rs3756802:46095836:G:A	chr6	46095836	-5.48709	-0.010931	2.72e-07	0.00011973
cg04801402	6	46138912	ENPP5	rs9369599:46095892:C:T	chr6	46095892	-5.48705	-0.0109298	2.72e-07	0.00011976
cg04801402	6	46138912	ENPP5	rs3756803:46096038:T:C	chr6	46096038	-5.48693	-0.010927	2.72e-07	0.00011981
cg04801402	6	46138912	ENPP5	rs71566566:46093128:C:T	chr6	46093128	-5.48693	-0.0109817	2.72e-07	0.00011981
cg04801402	6	46138912	ENPP5	rs910179:46105497:A:T	chr6	46105497	-5.48554	-0.0108968	2.74e-07	0.00012047
cg04801402	6	46138912	ENPP5	rs9357500:46097580:T:G	chr6	46097580	-5.48514	-0.0108964	2.75e-07	0.00012066
cg04801402	6	46138912	ENPP5	rs7775082	chr6	46097629	-5.48506	-0.0108954	2.75e-07	0.00012069
cg04801402	6	46138912	ENPP5	rs2179760:46106405:G:A	chr6	46106405	-5.48506	-0.0108954	2.75e-07	0.00012069
cg04801402	6	46138912	ENPP5	rs2143747:46105419:T:C	chr6	46105419	-5.48506	-0.0108954	2.75e-07	0.00012069
cg04801402	6	46138912	ENPP5	rs6458491	chr6	46106992	-5.48506	-0.0108954	2.75e-07	0.00012069
cg04801402	6	46138912	ENPP5	rs872859:46105901:T:A	chr6	46105901	-5.48506	-0.0108954	2.75e-07	0.00012069
cg04801402	6	46138912	ENPP5	rs7451713	chr6	46107752	-5.48506	-0.0108954	2.75e-07	0.00012069
cg04801402	6	46138912	ENPP5	rs200691987	chr6	46100892	-5.48506	-0.0108954	2.75e-07	0.00012069
cg04801402	6	46138912	ENPP5	rs6458490:46106424:C:A	chr6	46106424	-5.48506	-0.0108954	2.75e-07	0.00012069
cg04801402	6	46138912	ENPP5	rs7357078:46104424:G:A	chr6	46104424	-5.48506	-0.0108954	2.75e-07	0.00012069
cg04801402	6	46138912	ENPP5	rs12196107:46104120:T:C	chr6	46104120	-5.48506	-0.0108954	2.75e-07	0.00012069
cg04801402	6	46138912	ENPP5	rs12215921:46104105:C:T	chr6	46104105	-5.48506	-0.0108954	2.75e-07	0.00012069
cg04801402	6	46138912	ENPP5	rs10807335:46100700:A:G	chr6	46100700	-5.48506	-0.0108954	2.75e-07	0.00012069
cg04801402	6	46138912	ENPP5	rs10948283:46099063:C:A	chr6	46099063	-5.48506	-0.0108954	2.75e-07	0.00012069
cg04801402	6	46138912	ENPP5	rs9472694:46100032:G:A	chr6	46100032	-5.4832	-0.0108927	2.77e-07	0.0001216
cg04801402	6	46138912	ENPP5	rs9472693:46100030:A:G	chr6	46100030	-5.4832	-0.0108927	2.77e-07	0.0001216
cg04801402	6	46138912	ENPP5	rs9367234:46090390:A:G	chr6	46090390	-5.48158	-0.0110194	2.79e-07	0.00012237
cg13696752	9	4662858	SPATA6L	rs6476890:4659551:A:G	chr9	4659551	5.47841	0.0197535	2.83e-07	0.0001239
cg13696752	9	4662858	SPATA6L	rs6476889:4659550:G:C	chr9	4659550	5.47819	0.0197528	2.83e-07	0.00012401
cg00603274	11	61596626	FADS2	rs174628:61637587:T:C	chr11	61637587	5.4774	0.013005	2.84e-07	0.0001244
cg13696752	9	4662858	SPATA6L	rs6476888:4659510:A:C	chr9	4659510	5.47404	0.0197417	2.88e-07	0.00012606
cg04801402	6	46138912	ENPP5	rs2206968:46087905:A:T	chr6	46087905	-5.47195	-0.0110392	2.91e-07	0.00012708
cg23598080	1	180204499	LHX4	rs355633:180207108:C:T	chr1	180207108	-5.46921	-0.0126564	2.95e-07	0.00012844
cg04801402	6	46138912	ENPP5	rs115696497:46085549:T:G	chr6	46085549	-5.46526	-0.0110673	3e-07	0.00013044
cg13696752	9	4662858	SPATA6L	rs6476885:4659418:T:C	chr9	4659418	5.46418	0.0197147	3.01e-07	0.00013099
cg09477019	16	56681945	NA	rs1846692	chr16	56671696	5.4573	0.030497	3.1e-07	0.00013457
cg13696752	9	4662858	SPATA6L	rs6476887:4659458:A:C	chr9	4659458	5.45397	0.0196958	3.15e-07	0.00013634
cg13696752	9	4662858	SPATA6L	rs6476886:4659449:T:C	chr9	4659449	5.45253	0.0196923	3.17e-07	0.00013712
cg23598080	1	180204499	LHX4	rs12752192:180201130:T:A	chr1	180201130	-5.44665	-0.0121896	3.25e-07	0.00014028
cg04801402	6	46138912	ENPP5	rs8180644:46081498:C:T	chr6	46081498	-5.44378	-0.0110389	3.3e-07	0.00014181
cg04801402	6	46138912	ENPP5	rs995564:46082810:C:T	chr6	46082810	-5.44378	-0.0110389	3.3e-07	0.00014181
cg07758738	18	12911528	NA	rs8092942:12895429:T:G	chr18	12895429	-5.43381	-0.0309777	3.44e-07	0.00014747
cg23779890	8	75262522	GDAP1	rs10093042	chr8	75270901	5.43221	0.0142944	3.47e-07	0.0001484
cg13696752	9	4662858	SPATA6L	rs301485:4652179:C:G	chr9	4652179	5.4264	0.0196059	3.56e-07	0.00015187
cg13696752	9	4662858	SPATA6L	rs7044776:4659250:A:G	chr9	4659250	5.42631	0.0196058	3.56e-07	0.00015192
cg13696752	9	4662858	SPATA6L	rs7028988:4659228:C:T	chr9	4659228	5.4238	0.0195974	3.6e-07	0.00015341
cg13696752	9	4662858	SPATA6L	rs397280:4655278:T:G	chr9	4655278	5.4202	0.0197882	3.66e-07	0.00015559
cg13696752	9	4662858	SPATA6L	rs7047933	chr9	4659111	5.41068	0.0195556	3.81e-07	0.00016144
cg13696752	9	4662858	SPATA6L	rs1385456	chr9	4651478	5.41007	0.018935	3.82e-07	0.00016182
cg13696752	9	4662858	SPATA6L	rs419083:4658865:C:G	chr9	4658865	5.40815	0.0195502	3.85e-07	0.000163
cg13696752	9	4662858	SPATA6L	rs367376:4658811:G:A	chr9	4658811	5.40789	0.0195496	3.86e-07	0.00016316
cg13696752	9	4662858	SPATA6L	rs367800:4658662:G:A	chr9	4658662	5.40739	0.0195486	3.87e-07	0.00016349
cg13696752	9	4662858	SPATA6L	rs369733:4658369:A:G	chr9	4658369	5.40484	0.0195434	3.91e-07	0.00016509
cg04801402	6	46138912	ENPP5	rs7754582	chr6	46067273	-5.40213	-0.0105338	3.96e-07	0.00016684
cg13696752	9	4662858	SPATA6L	rs379900:4657794:A:G	chr9	4657794	5.39896	0.0195302	4.01e-07	0.00016889
cg09477019	16	56681945	NA	rs7194889:56661507:C:T	chr16	56661507	-5.39793	-0.024977	4.03e-07	0.00016956
cg13696752	9	4662858	SPATA6L	rs378809:4657863:G:C	chr9	4657863	5.39785	0.0195269	4.03e-07	0.00016961
cg13696752	9	4662858	SPATA6L	rs376208:4657864:A:T	chr9	4657864	5.39785	0.0195269	4.03e-07	0.00016961
cg13696752	9	4662858	SPATA6L	rs428111:4657688:T:C	chr9	4657688	5.39639	0.0195245	4.06e-07	0.00017056
cg00603274	11	61596626	FADS2	rs174559:61581656:G:A	chr11	61581656	5.39517	0.0121211	4.08e-07	0.00017138
cg13696752	9	4662858	SPATA6L	rs374734:4657002:G:T	chr9	4657002	5.39341	0.0195228	4.11e-07	0.00017257
cg09477019	16	56681945	NA	rs59205955:56656609:A:G	chr16	56656609	-5.37517	-0.0583402	4.45e-07	0.00018517
cg23598080	1	180204499	LHX4	rs3856050	chr1	180203147	-5.37402	-0.0123126	4.48e-07	0.00018601
cg13696752	9	4662858	SPATA6L	rs448655:4659586:G:A	chr9	4659586	5.36727	0.0188969	4.61e-07	0.00019094
cg04801402	6	46138912	ENPP5	rs9395158:46109576:G:T	chr6	46109576	-5.36437	-0.0108429	4.67e-07	0.0001931
cg00603274	11	61596626	FADS2	rs28456:61589481:A:G	chr11	61589481	5.35499	0.0120097	4.86e-07	0.00020024
cg13696752	9	4662858	SPATA6L	rs36160237:4659454:G:A	chr9	4659454	5.34013	0.0188345	5.19e-07	0.00021199
cg23598080	1	180204499	LHX4	rs3842892:180197414:C:T	chr1	180197414	-5.33911	-0.0120758	5.21e-07	0.0002128
cg07758738	18	12911528	NA	rs4797713:12894622:A:G	chr18	12894622	-5.33251	-0.0307855	5.37e-07	0.00021833
cg23598080	1	180204499	LHX4	rs6425616	chr1	180201184	-5.32486	-0.0122456	5.55e-07	0.0002249
cg04801402	6	46138912	ENPP5	rs7769902:46110821:A:G	chr6	46110821	-5.32415	-0.010908	5.56e-07	0.00022553
cg23598080	1	180204499	LHX4	rs7529839:180210926:T:G	chr1	180210926	-5.31544	-0.0124716	5.78e-07	0.00023314
cg23598080	1	180204499	LHX4	rs355636:180209356:G:A	chr1	180209356	-5.30234	-0.0124558	6.12e-07	0.00024515
cg13696752	9	4662858	SPATA6L	rs5896085	chr9	4657213	5.30164	0.0187146	6.14e-07	0.00024581
cg04801402	6	46138912	ENPP5	rs7769738:46110726:A:G	chr6	46110726	-5.30155	-0.0107771	6.14e-07	0.0002459
cg13696752	9	4662858	SPATA6L	rs367068:4658850:G:A	chr9	4658850	5.29918	0.0187093	6.2e-07	0.00024814
cg13696752	9	4662858	SPATA6L	rs6476880:4652209:C:T	chr9	4652209	5.29852	0.0190298	6.22e-07	0.00024877
cg13696752	9	4662858	SPATA6L	rs7025858:4651982:C:T	chr9	4651982	5.29743	0.0190288	6.25e-07	0.00024982
cg04801402	6	46138912	ENPP5	rs9472698:46110405:G:A	chr6	46110405	-5.29383	-0.0107561	6.35e-07	0.00025331
cg04801402	6	46138912	ENPP5	rs9472704:46117984:G:A	chr6	46117984	-5.2935	-0.0107558	6.36e-07	0.00025363
cg04801402	6	46138912	ENPP5	rs6923745:46126282:A:T	chr6	46126282	-5.29331	-0.0107554	6.36e-07	0.00025381
cg04801402	6	46138912	ENPP5	rs9472700:46116332:A:G	chr6	46116332	-5.29331	-0.0107554	6.36e-07	0.00025381
cg04801402	6	46138912	ENPP5	rs14781	chr6	46128269	-5.29331	-0.0107554	6.36e-07	0.00025381
cg04801402	6	46138912	ENPP5	rs201967006	chr6	46115350	5.29331	0.0107554	6.36e-07	0.00025381
cg04801402	6	46138912	ENPP5	rs1048082:46113221:A:T	chr6	46113221	-5.29331	-0.0107554	6.36e-07	0.00025381
cg04801402	6	46138912	ENPP5	rs6930766	chr6	46127626	-5.29331	-0.0107554	6.36e-07	0.00025381
cg04801402	6	46138912	ENPP5	rs2206965:46123614:G:A	chr6	46123614	-5.29331	-0.0107554	6.36e-07	0.00025381
cg04801402	6	46138912	ENPP5	rs9369600:46121855:T:C	chr6	46121855	-5.29331	-0.0107554	6.36e-07	0.00025381
cg04801402	6	46138912	ENPP5	rs9357501:46120231:G:A	chr6	46120231	-5.29331	-0.0107554	6.36e-07	0.00025381
cg04801402	6	46138912	ENPP5	rs9463185:46114653:G:A	chr6	46114653	-5.29331	-0.0107554	6.36e-07	0.00025381
cg04801402	6	46138912	ENPP5	rs2235883	chr6	46128688	-5.29331	-0.0107554	6.36e-07	0.00025381
cg04801402	6	46138912	ENPP5	rs3905440:46124855:T:C	chr6	46124855	-5.29331	-0.0107554	6.36e-07	0.00025381
cg04801402	6	46138912	ENPP5	rs9367237:46124799:T:A	chr6	46124799	-5.29331	-0.0107554	6.36e-07	0.00025381
cg04801402	6	46138912	ENPP5	rs9381430:46121885:C:T	chr6	46121885	-5.29331	-0.0107554	6.36e-07	0.00025381
cg04801402	6	46138912	ENPP5	rs1048076:46112372:T:C	chr6	46112372	-5.29331	-0.0107554	6.36e-07	0.00025381
cg04801402	6	46138912	ENPP5	rs2894662:46125002:T:C	chr6	46125002	-5.29331	-0.0107554	6.36e-07	0.00025381
cg04801402	6	46138912	ENPP5	rs9349348:46120103:A:G	chr6	46120103	-5.29331	-0.0107554	6.36e-07	0.00025381
cg04801402	6	46138912	ENPP5	rs3777634:46114531:G:A	chr6	46114531	-5.29331	-0.0107554	6.36e-07	0.00025381
cg04801402	6	46138912	ENPP5	rs1048083	chr6	46113552	-5.29331	-0.0107554	6.36e-07	0.00025381
cg04801402	6	46138912	ENPP5	rs9395159:46117646:G:A	chr6	46117646	-5.29331	-0.0107554	6.36e-07	0.00025381
cg04801402	6	46138912	ENPP5	rs9472707:46119669:T:C	chr6	46119669	-5.29331	-0.0107554	6.36e-07	0.00025381
cg04801402	6	46138912	ENPP5	rs7773230:46079664:T:C	chr6	46079664	-5.29315	-0.0105517	6.37e-07	0.00025397
cg13696752	9	4662858	SPATA6L	rs431901:4657840:T:C	chr9	4657840	5.28907	0.018686	6.48e-07	0.00025802
cg04427498	7	20830657	NA	rs958196:20834050:T:A	chr7	20834050	5.28853	0.0272172	6.5e-07	0.00025857
cg00603274	11	61596626	FADS2	rs7394579:61581450:A:G	chr11	61581450	5.28852	0.0120438	6.5e-07	0.00025858
cg04801402	6	46138912	ENPP5	rs2235881	chr6	46129345	-5.27428	-0.010556	6.91e-07	0.00027306
cg13696752	9	4662858	SPATA6L	rs10974718:4669547:T:C	chr9	4669547	5.26168	0.0257868	7.3e-07	0.00028661
cg13696752	9	4662858	SPATA6L	rs10815053:4669520:G:A	chr9	4669520	5.26159	0.0257878	7.3e-07	0.00028672
cg13696752	9	4662858	SPATA6L	rs4352899	chr9	4662286	5.25052	0.0296503	7.66e-07	0.00029904
cg08715231	8	25906064	NA	rs11775594	chr8	25871881	5.2462	0.0159287	7.8e-07	0.00030396
cg00603274	11	61596626	FADS2	rs174561:61582708:T:C	chr11	61582708	5.24454	0.0117983	7.86e-07	0.00030589
cg02225085	5	87975992	LINC00461	rs34961:87956636:T:A	chr5	87956636	5.23979	0.0185751	8.02e-07	0.00031144
cg13696752	9	4662858	SPATA6L	rs301489	chr9	4661853	5.23955	0.0187056	8.03e-07	0.00031172
cg13696752	9	4662858	SPATA6L	rs7045213:4652398:A:G	chr9	4652398	5.23337	0.0184326	8.25e-07	0.00031918
cg13696752	9	4662858	SPATA6L	rs6476881:4653500:A:C	chr9	4653500	5.23137	0.0184651	8.32e-07	0.00032162
cg23598080	1	180204499	LHX4	rs11583176:180198727:C:G	chr1	180198727	-5.22634	-0.0121365	8.5e-07	0.00032778
cg00603274	11	61596626	FADS2	rs174560:61581764:T:C	chr11	61581764	5.22631	0.0117582	8.5e-07	0.00032782
cg13696752	9	4662858	SPATA6L	rs7041319:4651631:A:C	chr9	4651631	5.22594	0.0185121	8.52e-07	0.00032828
cg00603274	11	61596626	FADS2	rs174557:61581368:A:G	chr11	61581368	5.21836	0.0117404	8.8e-07	0.00033782
cg23598080	1	180204499	LHX4	rs355614:180198497:A:G	chr1	180198497	-5.21541	-0.0121205	8.91e-07	0.0003416
cg23779890	8	75262522	GDAP1	rs6995700:75274727:G:A	chr8	75274727	-5.21237	-0.0139827	9.03e-07	0.00034556
cg23779890	8	75262522	GDAP1	rs6995431:75274757:A:G	chr8	75274757	-5.21237	-0.0139827	9.03e-07	0.00034556
cg13696752	9	4662858	SPATA6L	rs7875870:4659943:T:C	chr9	4659943	5.20664	0.018731	9.26e-07	0.000353
cg13696752	9	4662858	SPATA6L	rs6476884:4654963:T:C	chr9	4654963	5.20626	0.0192187	9.27e-07	0.00035353
cg00603274	11	61596626	FADS2	rs174556:61580635:C:T	chr11	61580635	5.20371	0.0117071	9.37e-07	0.00035686
cg23779890	8	75262522	GDAP1	rs3739345:75263276:A:T	chr8	75263276	-5.20088	-0.0139517	9.49e-07	0.00036061
cg23779890	8	75262522	GDAP1	rs6472842:75278457:A:G	chr8	75278457	-5.20088	-0.0139517	9.49e-07	0.00036061
cg23779890	8	75262522	GDAP1	rs13278617:75266914:C:T	chr8	75266914	5.20088	0.0139517	9.49e-07	0.00036061
cg23779890	8	75262522	GDAP1	rs7000984:75275821:A:G	chr8	75275821	-5.20088	-0.0139517	9.49e-07	0.00036061
cg23779890	8	75262522	GDAP1	rs16938888	chr8	75265600	-5.20088	-0.0139517	9.49e-07	0.00036061
cg23779890	8	75262522	GDAP1	rs11554166	chr8	75274141	-5.20088	-0.0139517	9.49e-07	0.00036061
cg23779890	8	75262522	GDAP1	rs10504579:75267716:C:A	chr8	75267716	-5.20088	-0.0139517	9.49e-07	0.00036061
cg23779890	8	75262522	GDAP1	rs62524066:75268235:C:T	chr8	75268235	-5.20088	-0.0139517	9.49e-07	0.00036061
cg23779890	8	75262522	GDAP1	rs10089711:75261348:T:C	chr8	75261348	5.20088	0.0139517	9.49e-07	0.00036061
cg23779890	8	75262522	GDAP1	rs4415302:75263057:C:T	chr8	75263057	-5.20088	-0.0139517	9.49e-07	0.00036061
cg23779890	8	75262522	GDAP1	rs16938889:75269368:A:C	chr8	75269368	-5.20088	-0.0139517	9.49e-07	0.00036061
cg23779890	8	75262522	GDAP1	rs57339169:75260136:G:A	chr8	75260136	-5.20088	-0.0139517	9.49e-07	0.00036061
cg04801402	6	46138912	ENPP5	rs3806994:46136663:T:C	chr6	46136663	-5.19488	-0.01067	9.74e-07	0.00036887
cg13696752	9	4662858	SPATA6L	rs4295714:4660395:A:G	chr9	4660395	5.19271	0.0178051	9.83e-07	0.00037186
cg23779890	8	75262522	GDAP1	rs56089345:75283696:C:G	chr8	75283696	-5.18684	-0.0139239	1.01e-06	0.00038004
cg00603274	11	61596626	FADS2	rs174555:61579760:T:C	chr11	61579760	5.18541	0.0116648	1.01e-06	0.00038211
cg04801402	6	46138912	ENPP5	rs9472709:46130385:A:G	chr6	46130385	-5.18183	-0.0105882	1.03e-06	0.00038732
cg04801402	6	46138912	ENPP5	rs3806995	chr6	46135984	-5.18183	-0.0105882	1.03e-06	0.00038732
cg04801402	6	46138912	ENPP5	rs7748469:46131001:A:G	chr6	46131001	-5.18183	-0.0105882	1.03e-06	0.00038732
cg04801402	6	46138912	ENPP5	rs7748442:46130906:C:G	chr6	46130906	-5.18183	-0.0105882	1.03e-06	0.00038732
cg04801402	6	46138912	ENPP5	rs12526912:46134274:A:G	chr6	46134274	-5.18183	-0.0105882	1.03e-06	0.00038732
cg04801402	6	46138912	ENPP5	rs7770384:46133694:G:A	chr6	46133694	-5.18183	-0.0105882	1.03e-06	0.00038732
cg04801402	6	46138912	ENPP5	rs6926570	chr6	46135489	-5.18183	-0.0105882	1.03e-06	0.00038732
cg04801402	6	46138912	ENPP5	rs9472715:46134706:T:C	chr6	46134706	-5.18183	-0.0105882	1.03e-06	0.00038732
cg04801402	6	46138912	ENPP5	rs9472708:46130369:G:A	chr6	46130369	-5.18183	-0.0105882	1.03e-06	0.00038732
cg04801402	6	46138912	ENPP5	rs9472713:46134609:C:G	chr6	46134609	-5.18183	-0.0105882	1.03e-06	0.00038732
cg04801402	6	46138912	ENPP5	rs13201945:46137101:C:G	chr6	46137101	-5.18183	-0.0105882	1.03e-06	0.00038732
cg23779890	8	75262522	GDAP1	rs62524068:75285079:G:C	chr8	75285079	-5.18065	-0.0139108	1.03e-06	0.00038902
cg00603274	11	61596626	FADS2	rs174544:61567753:C:A	chr11	61567753	5.17854	0.0116487	1.04e-06	0.00039216
cg00603274	11	61596626	FADS2	rs174549:61571382:G:A	chr11	61571382	5.17854	0.0116487	1.04e-06	0.00039216
cg13696752	9	4662858	SPATA6L	rs6476883:4654774:G:A	chr9	4654774	5.16963	0.0184223	1.09e-06	0.00040526
cg23779890	8	75262522	GDAP1	rs10094204:75288650:C:T	chr8	75288650	5.16481	0.0138776	1.11e-06	0.00041269
cg09477019	16	56681945	NA	rs7198676:56684825:A:G	chr16	56684825	-5.16337	-0.0310315	1.11e-06	0.00041496
cg23779890	8	75262522	GDAP1	rs6996555:75289087:T:C	chr8	75289087	-5.16266	-0.013873	1.12e-06	0.00041606
cg23779890	8	75262522	GDAP1	rs7014464:75289091:C:T	chr8	75289091	-5.16239	-0.0138724	1.12e-06	0.00041647
cg13696752	9	4662858	SPATA6L	rs301484:4648876:T:C	chr9	4648876	5.15951	0.0192824	1.13e-06	0.00042097
cg09477019	16	56681945	NA	rs7197489	chr16	56683993	-5.15778	-0.0310077	1.14e-06	0.00042375
cg09477019	16	56681945	NA	rs4464073:56690038:C:T	chr16	56690038	-5.15778	-0.0310077	1.14e-06	0.00042375
cg23779890	8	75262522	GDAP1	rs3780013:75265922:T:C	chr8	75265922	-5.15574	-0.0139005	1.15e-06	0.00042701
cg13696752	9	4662858	SPATA6L	rs7869353:4655915:G:C	chr9	4655915	5.15428	0.018371	1.16e-06	0.00042938
cg13696752	9	4662858	SPATA6L	rs6476882:4654730:G:A	chr9	4654730	5.14849	0.0186407	1.19e-06	0.00043882
cg23598080	1	180204499	LHX4	rs165257:180204618:T:C	chr1	180204618	-5.14442	-0.0119254	1.21e-06	0.00044554
cg23779890	8	75262522	GDAP1	rs7813560:75290170:A:G	chr8	75290170	-5.1439	-0.0138328	1.21e-06	0.00044643
cg23779890	8	75262522	GDAP1	rs7813701:75290169:C:T	chr8	75290169	-5.1439	-0.0138328	1.21e-06	0.00044643
cg23779890	8	75262522	GDAP1	rs6987150:75290914:G:T	chr8	75290914	-5.13881	-0.0138258	1.24e-06	0.00045509
cg13696752	9	4662858	SPATA6L	rs10116016:4655859:C:G	chr9	4655859	5.1232	0.0185276	1.32e-06	0.00048273
cg09477019	16	56681945	NA	rs11076160	chr16	56673143	5.12299	0.0293476	1.32e-06	0.0004831
cg09477019	16	56681945	NA	rs11076161:56673148:A:G	chr16	56673148	5.12299	0.0293476	1.32e-06	0.0004831
cg13696752	9	4662858	SPATA6L	rs301479:4648205:C:T	chr9	4648205	5.12297	0.0191953	1.32e-06	0.00048314
cg23779890	8	75262522	GDAP1	rs57669008	chr8	75254460	-5.12035	-0.0138376	1.34e-06	0.00048787
cg13696752	9	4662858	SPATA6L	rs301478:4648145:G:T	chr9	4648145	5.11886	0.0191837	1.35e-06	0.00049054
cg23779890	8	75262522	GDAP1	rs62524069:75291168:G:A	chr8	75291168	-5.11625	-0.0137697	1.36e-06	0.00049536
cg13696752	9	4662858	SPATA6L	rs301476:4648081:C:A	chr9	4648081	5.1078	0.0191556	1.41e-06	0.00051129
cg00603274	11	61596626	FADS2	rs174451:61642763:C:T	chr11	61642763	5.10397	0.0125371	1.44e-06	0.00051875
cg09477019	16	56681945	NA	rs2070836:56660120:G:C	chr16	56660120	-5.09615	-0.0556179	1.48e-06	0.00053401
cg13696752	9	4662858	SPATA6L	rs7024582:4658995:G:A	chr9	4658995	5.09544	0.0183442	1.49e-06	0.00053543
cg13696752	9	4662858	SPATA6L	rs390880:4648572:A:C	chr9	4648572	5.08838	0.0192269	1.53e-06	0.00054965
cg13696752	9	4662858	SPATA6L	rs446217:4648573:G:A	chr9	4648573	5.08838	0.0192269	1.53e-06	0.00054965
cg13696752	9	4662858	SPATA6L	rs7848239:4657757:G:C	chr9	4657757	5.0876	0.0183442	1.54e-06	0.00055124
cg23779890	8	75262522	GDAP1	rs10957708:75291893:A:G	chr8	75291893	-5.0789	-0.0136816	1.6e-06	0.00056941
cg13696752	9	4662858	SPATA6L	rs10815052:4648694:C:T	chr9	4648694	5.06935	0.0187322	1.66e-06	0.00058964
cg13696752	9	4662858	SPATA6L	rs301474:4647524:G:A	chr9	4647524	5.06391	0.0190101	1.7e-06	0.00060171
cg23779890	8	75262522	GDAP1	rs7350096:75310307:G:A	chr8	75310307	-5.06004	-0.0134646	1.73e-06	0.00061048
cg23779890	8	75262522	GDAP1	rs62524086:75297588:G:A	chr8	75297588	-5.05859	-0.0134603	1.74e-06	0.00061371
cg23779890	8	75262522	GDAP1	rs62524090:75323595:T:C	chr8	75323595	-5.05426	-0.0133328	1.77e-06	0.00062355
cg07758738	18	12911528	NA	rs8089211:12891170:A:G	chr18	12891170	-5.05017	-0.0298778	1.8e-06	0.0006331
cg02225085	5	87975992	LINC00461	rs13159808:88194669:T:A	chr5	88194669	5.04951	0.0191391	1.81e-06	0.00063464
cg13696752	9	4662858	SPATA6L	rs301473:4647307:C:T	chr9	4647307	5.04654	0.0189481	1.83e-06	0.00064155
cg23779890	8	75262522	GDAP1	rs10504580	chr8	75278816	-5.04102	-0.0133988	1.88e-06	0.00065449
cg13696752	9	4662858	SPATA6L	rs418122:4644978:T:A	chr9	4644978	5.03591	0.019215	1.92e-06	0.00066703
cg13696752	9	4662858	SPATA6L	rs364802:4644979:T:C	chr9	4644979	5.03592	0.0192151	1.92e-06	0.00066703
cg13696752	9	4662858	SPATA6L	rs301470:4646774:T:C	chr9	4646774	5.03051	0.0187433	1.96e-06	0.00068056
cg13696752	9	4662858	SPATA6L	rs301471:4646991:C:T	chr9	4646991	5.02092	0.0188533	2.04e-06	0.00070477
cg13696752	9	4662858	SPATA6L	rs301461:4644835:T:C	chr9	4644835	5.01147	0.019134	2.13e-06	0.00072962
cg13696752	9	4662858	SPATA6L	rs301464:4645214:C:T	chr9	4645214	5.0108	0.0188396	2.13e-06	0.00073141
cg13696752	9	4662858	SPATA6L	rs301465:4645222:C:T	chr9	4645222	5.01066	0.0188384	2.13e-06	0.00073179
cg13696752	9	4662858	SPATA6L	rs301462:4644856:T:A	chr9	4644856	5.01032	0.0191274	2.14e-06	0.00073272
cg13696752	9	4662858	SPATA6L	rs301463:4644941:A:G	chr9	4644941	5.00874	0.0191003	2.15e-06	0.00073697
cg13696752	9	4662858	SPATA6L	rs301466:4645512:C:T	chr9	4645512	5.00521	0.0188065	2.18e-06	0.00074648
cg13696752	9	4662858	SPATA6L	rs10758639:4648617:G:A	chr9	4648617	5.00142	0.0181926	2.22e-06	0.00075648
cg13696752	9	4662858	SPATA6L	rs301467:4645806:T:C	chr9	4645806	4.9995	0.0187718	2.24e-06	0.00076174
cg13696752	9	4662858	SPATA6L	rs301469:4646363:C:T	chr9	4646363	4.99769	0.0187632	2.25e-06	0.00076675
cg13696752	9	4662858	SPATA6L	rs184205:4676745:G:C	chr9	4676745	4.99637	0.0195405	2.26e-06	0.0007705
cg23598080	1	180204499	LHX4	rs355627	chr1	180201104	-4.99615	-0.0114784	2.27e-06	0.00077106
cg23598080	1	180204499	LHX4	rs164982:180202746:A:C	chr1	180202746	-4.99615	-0.0114784	2.27e-06	0.00077106
cg13696752	9	4662858	SPATA6L	rs1905765:4650575:T:G	chr9	4650575	4.99542	0.0180108	2.27e-06	0.00077311
cg13696752	9	4662858	SPATA6L	rs301468	chr9	4645935	4.98336	0.0187238	2.39e-06	0.0008079
cg23598080	1	180204499	LHX4	rs7527274:180210791:A:C	chr1	180210791	-4.97242	-0.0168252	2.5e-06	0.00084099
cg23779890	8	75262522	GDAP1	rs61081722:75304953:A:G	chr8	75304953	-4.97219	-0.0134205	2.51e-06	0.00084169
cg23779890	8	75262522	GDAP1	rs58094920:75315019:A:C	chr8	75315019	-4.96579	-0.0133883	2.58e-06	0.00086133
cg23779890	8	75262522	GDAP1	rs16938900:75308482:C:T	chr8	75308482	-4.96495	-0.0133909	2.58e-06	0.00086401
cg23779890	8	75262522	GDAP1	rs4551345:75292728:C:T	chr8	75292728	4.96489	0.0133909	2.59e-06	0.0008642
cg23779890	8	75262522	GDAP1	rs7018207:75293150:T:C	chr8	75293150	-4.96489	-0.0133909	2.59e-06	0.0008642
cg07758738	18	12911528	NA	rs11080609:12888519:G:A	chr18	12888519	-4.9645	-0.0299803	2.59e-06	0.00086541
cg09477019	16	56681945	NA	rs6499846:56662357:G:A	chr16	56662357	-4.96187	-0.0429013	2.62e-06	0.00087386
cg09477019	16	56681945	NA	rs1604122:56663300:C:G	chr16	56663300	4.95209	0.0428349	2.73e-06	0.00090542
cg26726141	17	64612159	PRKCA	rs67454054:64540752:C:T	chr17	64540752	4.93005	0.0214827	2.99e-06	0.00098064
cg02225085	5	87975992	LINC00461	rs35788185:88073228:T:A	chr5	88073228	4.92471	0.0222193	3.06e-06	0.00100015
cg15995695	1	179334675	AXDND1	rs6425577:179527183:C:T	chr1	179527183	4.92274	0.0198439	3.08e-06	0.00100739
cg02225085	5	87975992	LINC00461	rs12521662	chr5	88081496	4.91882	0.0221792	3.13e-06	0.00102168
cg02225085	5	87975992	LINC00461	rs1065932:88091868:T:G	chr5	88091868	4.91882	0.0221792	3.13e-06	0.00102168
cg15995695	1	179334675	AXDND1	rs10458351:179522553:A:G	chr1	179522553	4.91802	0.0198281	3.14e-06	0.00102466
cg00425710	16	56672671	MT1A	rs1827210:56667282:C:A	chr16	56667282	4.9075	0.0360798	3.29e-06	0.00106345
cg00425710	16	56672671	MT1A	rs2270837:56667854:A:G	chr16	56667854	4.9075	0.0360798	3.29e-06	0.00106345
cg13696752	9	4662858	SPATA6L	rs2146423	chr9	4657040	4.90556	0.0180997	3.31e-06	0.00107087
cg15995695	1	179334675	AXDND1	rs1410592	chr1	179520506	4.8965	0.0197229	3.44e-06	0.00110664
cg15995695	1	179334675	AXDND1	rs1410591:179520254:C:G	chr1	179520254	4.8965	0.0197229	3.44e-06	0.00110664
cg15995695	1	179334675	AXDND1	rs3767840:179519489:G:A	chr1	179519489	4.8965	0.0197229	3.44e-06	0.00110664
cg09477019	16	56681945	NA	rs12933833	chr16	56697684	-4.89157	-0.0440418	3.51e-06	0.00112652
cg23779890	8	75262522	GDAP1	rs6472849	chr8	75332823	4.89127	0.0126404	3.52e-06	0.00112778
cg15995695	1	179334675	AXDND1	rs7546708:179523090:G:A	chr1	179523090	4.88452	0.0198094	3.62e-06	0.00115586
cg06634716	1	217311151	ESRRG	rs1032780:217340950:C:T	chr1	217340950	4.87637	0.0172042	3.74e-06	0.00119006
cg13696752	9	4662858	SPATA6L	rs301488	chr9	4662065	4.87069	0.021321	3.83e-06	0.00121442
cg06634716	1	217311151	ESRRG	rs11117779:217328641:G:C	chr1	217328641	4.87021	0.0172086	3.84e-06	0.00121658
cg06634716	1	217311151	ESRRG	rs11117778	chr1	217326390	4.86973	0.0172026	3.84e-06	0.00121866
cg06634716	1	217311151	ESRRG	rs1532717:217333320:G:A	chr1	217333320	4.86973	0.0172026	3.84e-06	0.00121866
cg06634716	1	217311151	ESRRG	rs1502352	chr1	217337735	4.86973	0.0172026	3.84e-06	0.00121866
cg06634716	1	217311151	ESRRG	rs12119765:217318595:T:C	chr1	217318595	4.86973	0.0172026	3.84e-06	0.00121866
cg06634716	1	217311151	ESRRG	rs6662692:217333699:G:A	chr1	217333699	4.86973	0.0172026	3.84e-06	0.00121866
cg06634716	1	217311151	ESRRG	rs924653:217335471:G:A	chr1	217335471	4.86973	0.0172026	3.84e-06	0.00121866
cg23598080	1	180204499	LHX4	rs355615:180198047:A:G	chr1	180198047	-4.86332	-0.0113136	3.95e-06	0.00124706
cg09477019	16	56681945	NA	rs57778164	chr16	56677634	4.86311	0.028202	3.95e-06	0.00124799
cg07758738	18	12911528	NA	rs1916269	chr18	12894530	-4.8626	-0.0293649	3.96e-06	0.00125031
cg23779890	8	75262522	GDAP1	rs13271288:75334714:T:G	chr8	75334714	4.85659	0.0126506	4.06e-06	0.00127766
cg23779890	8	75262522	GDAP1	rs6472848:75331619:G:C	chr8	75331619	4.84711	0.0119808	4.22e-06	0.00132189
cg23779890	8	75262522	GDAP1	rs7826609:75335352:A:G	chr8	75335352	4.8467	0.0119788	4.23e-06	0.00132387
cg13154880	4	48486472	SLC10A4	rs992423	chr4	48481976	-4.84666	-0.0144664	4.23e-06	0.00132411
cg23779890	8	75262522	GDAP1	rs62523878:75332426:A:G	chr8	75332426	-4.84665	-0.0119791	4.23e-06	0.00132412
cg23779890	8	75262522	GDAP1	rs56347257:75337430:C:T	chr8	75337430	-4.82455	-0.0119556	4.63e-06	0.00143314
cg23779890	8	75262522	GDAP1	rs56239924:75337481:T:C	chr8	75337481	-4.82376	-0.0119546	4.65e-06	0.00143722
cg23779890	8	75262522	GDAP1	rs55780920:75337522:T:G	chr8	75337522	-4.82313	-0.0119539	4.66e-06	0.00144054
cg04801402	6	46138912	ENPP5	rs6921826:46050368:G:C	chr6	46050368	-4.80913	-0.0107868	4.94e-06	0.00151428
cg04801402	6	46138912	ENPP5	rs976083	chr6	46064645	-4.80913	-0.0107868	4.94e-06	0.00151428
cg04801402	6	46138912	ENPP5	rs4331969:46052093:G:A	chr6	46052093	-4.8089	-0.0107863	4.94e-06	0.00151549
cg23779890	8	75262522	GDAP1	rs6472851:75338630:C:G	chr8	75338630	-4.80549	-0.0119311	5.01e-06	0.00153369
cg15995695	1	179334675	AXDND1	rs10494516:179516716:A:G	chr1	179516716	-4.79655	-0.0194345	5.2e-06	0.0015831
cg15995695	1	179334675	AXDND1	rs10494515	chr1	179517140	-4.79655	-0.0194345	5.2e-06	0.0015831
cg14377594	9	1051505	DMRT2	rs7854435	chr9	1056101	-4.79215	-0.0249503	5.3e-06	0.00160811
cg23779890	8	75262522	GDAP1	rs7012377:75331160:A:G	chr8	75331160	4.79083	0.0119109	5.32e-06	0.00161549
cg23779890	8	75262522	GDAP1	rs10112529	chr8	75335908	4.79045	0.0119072	5.33e-06	0.00161768
cg23779890	8	75262522	GDAP1	rs13280441:75335457:T:A	chr8	75335457	4.79045	0.0119072	5.33e-06	0.00161768
cg23779890	8	75262522	GDAP1	rs13278299:75335549:A:G	chr8	75335549	4.79045	0.0119072	5.33e-06	0.00161768
cg14377594	9	1051505	DMRT2	rs906773:1053523:C:T	chr9	1053523	-4.79027	-0.0255014	5.34e-06	0.00161876
cg14377594	9	1051505	DMRT2	rs906772:1053510:T:C	chr9	1053510	-4.79027	-0.0255014	5.34e-06	0.00161876
cg13696752	9	4662858	SPATA6L	rs1385452	chr9	4658449	4.78453	0.0162252	5.46e-06	0.00165249
cg11730703	14	105167607	INF2	rs4393510	chr14	105162257	-4.78308	-0.008259	5.5e-06	0.00166092
cg23779890	8	75262522	GDAP1	rs10103065:75336643:T:A	chr8	75336643	4.78	0.0118967	5.57e-06	0.00167927
cg03876032	10	26501065	MYO3A	rs35623505:26629153:T:C	chr10	26629153	-4.7696	-0.0218493	5.81e-06	0.00174241
cg15995695	1	179334675	AXDND1	rs34291276:179493855:G:A	chr1	179493855	4.75557	0.0183905	6.15e-06	0.00182846
cg00603274	11	61596626	FADS2	rs1535	chr11	61597972	4.75047	0.0100888	6.28e-06	0.00186145
cg23779890	8	75262522	GDAP1	rs10957718:75336314:T:G	chr8	75336314	4.73204	0.0117821	6.77e-06	0.00198481
cg23779890	8	75262522	GDAP1	rs11777305:75336315:T:C	chr8	75336315	4.73204	0.0117821	6.77e-06	0.00198481
cg15995695	1	179334675	AXDND1	rs3767841:179519608:A:G	chr1	179519608	-4.729	-0.0192941	6.86e-06	0.00200582
cg04427498	7	20830657	NA	rs10488575	chr7	20835440	4.71418	0.0339475	7.28e-06	0.00211242
cg06470822	6	28175283	NA	rs9368560	chr6	28159960	-4.70974	-0.0144938	7.42e-06	0.00214539
cg05467160	2	176945526	EVX2	rs1014273:176664821:T:C	chr2	176664821	4.70745	0.0180229	7.49e-06	0.00216237
cg05467160	2	176945526	EVX2	rs1446834:176665844:G:T	chr2	176665844	4.70741	0.0180228	7.49e-06	0.00216272
cg08715231	8	25906064	NA	rs7835016:25889501:C:A	chr8	25889501	4.69591	0.0132914	7.85e-06	0.00225074
cg06634716	1	217311151	ESRRG	rs1502353:217338790:C:T	chr1	217338790	4.67549	0.0164595	8.52e-06	0.0024168
cg02225085	5	87975992	LINC00461	rs165944	chr5	88110363	-4.67545	-0.0175899	8.52e-06	0.00241719
cg11730703	14	105167607	INF2	rs4275790	chr14	105162462	-4.671	-0.0081341	8.68e-06	0.00245453
cg06634716	1	217311151	ESRRG	rs2377477	chr1	217349340	4.67035	0.0164074	8.7e-06	0.00246009
cg11730703	14	105167607	INF2	rs4334222:105163142:A:G	chr14	105163142	-4.66777	-0.00819	8.79e-06	0.0024817
cg06634716	1	217311151	ESRRG	rs71643443:217313244:A:T	chr1	217313244	4.66379	0.0164175	8.94e-06	0.0025162
cg06634716	1	217311151	ESRRG	rs10863300:217323826:A:G	chr1	217323826	4.66287	0.0164037	8.97e-06	0.00252409
cg06634716	1	217311151	ESRRG	rs4846402:217335967:T:A	chr1	217335967	4.66279	0.0163992	8.97e-06	0.00252473
cg06634716	1	217311151	ESRRG	rs11117780:217334798:G:A	chr1	217334798	4.66279	0.0163992	8.97e-06	0.00252473
cg06634716	1	217311151	ESRRG	rs59077887:217331314:A:G	chr1	217331314	4.66279	0.0163992	8.97e-06	0.00252473
cg06634716	1	217311151	ESRRG	rs76622060:217330868:C:G	chr1	217330868	4.65613	0.016389	9.22e-06	0.00258207
cg00603274	11	61596626	FADS2	rs174548	chr11	61571348	4.65493	0.0105285	9.26e-06	0.00259287
cg04427498	7	20830657	NA	rs76858157:20827194:G:A	chr7	20827194	4.65108	0.033948	9.41e-06	0.00262761
cg13696752	9	4662858	SPATA6L	rs10815051	chr9	4644477	-4.64046	-0.016601	9.82e-06	0.00272451
cg04801402	6	46138912	ENPP5	rs11757793:46076138:T:A	chr6	46076138	-4.64043	-0.0096402	9.82e-06	0.00272475
cg02225085	5	87975992	LINC00461	rs304145	chr5	88159173	-4.63793	-0.0189169	9.92e-06	0.00274797
cg09477019	16	56681945	NA	rs2270836	chr16	56667614	4.63757	0.0224596	9.93e-06	0.00275146
cg26726141	17	64612159	PRKCA	rs1010544:64687446:A:G	chr17	64687446	4.63056	0.020531	1.02e-05	0.00281918
cg26726141	17	64612159	PRKCA	rs8070293	chr17	64682078	4.63056	0.020531	1.02e-05	0.00281918
cg09477019	16	56681945	NA	rs13336601:56677210:C:T	chr16	56677210	-4.62883	-0.0504844	1.03e-05	0.00283617
cg02225085	5	87975992	LINC00461	rs244760:88111209:C:G	chr5	88111209	-4.62856	-0.0174403	1.03e-05	0.00283874
cg13645908	17	714733	NXN	rs1983708	chr17	712921	-4.62619	-0.0083173	1.04e-05	0.00286194
cg13645908	17	714733	NXN	rs1983707	chr17	712900	-4.62619	-0.0083173	1.04e-05	0.00286194
cg16386080	9	90589146	CDK20	rs10868682:90642899:G:A	chr9	90642899	-4.62581	-0.0097476	1.04e-05	0.00286566
cg18400845	11	31837960	PAX6	rs75350757:32277732:T:G	chr11	32277732	-4.62509	-0.0155585	1.04e-05	0.00287257
cg02225085	5	87975992	LINC00461	rs2067664:88191594:C:G	chr5	88191594	4.619	0.018328	1.07e-05	0.00293417
cg02225085	5	87975992	LINC00461	rs13161714:88191634:G:C	chr5	88191634	4.61684	0.0183256	1.08e-05	0.00295537
cg02225085	5	87975992	LINC00461	rs13171125:88189812:T:C	chr5	88189812	4.61684	0.0183256	1.08e-05	0.00295537
cg02225085	5	87975992	LINC00461	rs13188739:88189524:G:C	chr5	88189524	4.61684	0.0183256	1.08e-05	0.00295537
cg02225085	5	87975992	LINC00461	rs4446500:88196003:A:G	chr5	88196003	4.61683	0.0183258	1.08e-05	0.00295554
cg07758738	18	12911528	NA	rs4797711	chr18	12893252	-4.61663	-0.0222571	1.08e-05	0.00295761
cg07758738	18	12911528	NA	rs4797710:12893018:G:C	chr18	12893018	-4.61449	-0.0222461	1.09e-05	0.00297909
cg26726141	17	64612159	PRKCA	rs9908758	chr17	64707202	4.61161	0.0202986	1.1e-05	0.00300872
cg23598080	1	180204499	LHX4	rs4570379	chr1	180206330	-4.60642	-0.0167632	1.13e-05	0.00306282
cg23779890	8	75262522	GDAP1	rs10098229:75253008:T:A	chr8	75253008	4.6056	0.0120249	1.13e-05	0.00307077
cg05467160	2	176945526	EVX2	rs6756201	chr2	176670489	4.60315	0.0174609	1.14e-05	0.00309695
cg05467160	2	176945526	EVX2	rs6756069:176670396:A:G	chr2	176670396	4.60315	0.0174609	1.14e-05	0.00309695
cg23779890	8	75262522	GDAP1	rs4467929:75340037:T:C	chr8	75340037	4.60291	0.0118964	1.14e-05	0.00309949
cg00603274	11	61596626	FADS2	rs174567:61593005:A:G	chr11	61593005	4.58974	0.0098847	1.2e-05	0.003242
cg00603274	11	61596626	FADS2	rs174568	chr11	61593816	4.58974	0.0098847	1.2e-05	0.003242
cg02225085	5	87975992	LINC00461	rs28712135:88084016:T:A	chr5	88084016	-4.58613	-0.0155014	1.22e-05	0.0032825
cg26726141	17	64612159	PRKCA	rs72843692:64537118:A:C	chr17	64537118	4.5832	0.0205054	1.24e-05	0.00331544
cg03876032	10	26501065	MYO3A	rs12252534:26352069:A:G	chr10	26352069	-4.57324	-0.0187559	1.29e-05	0.00343014
cg03876032	10	26501065	MYO3A	rs7081905:26441098:A:G	chr10	26441098	-4.5729	-0.0187545	1.29e-05	0.00343417
cg03876032	10	26501065	MYO3A	rs7096646:26446669:G:A	chr10	26446669	-4.5729	-0.0187545	1.29e-05	0.00343417
cg03876032	10	26501065	MYO3A	rs2176941:26403673:G:C	chr10	26403673	-4.5729	-0.0187545	1.29e-05	0.00343417
cg03876032	10	26501065	MYO3A	rs1402437:26398386:T:A	chr10	26398386	-4.5729	-0.0187545	1.29e-05	0.00343417
cg03876032	10	26501065	MYO3A	rs7895734:26419712:G:C	chr10	26419712	-4.5729	-0.0187545	1.29e-05	0.00343417
cg03876032	10	26501065	MYO3A	rs7079780:26437506:C:T	chr10	26437506	-4.5729	-0.0187545	1.29e-05	0.00343417
cg03876032	10	26501065	MYO3A	rs11598861:26396013:G:A	chr10	26396013	-4.5729	-0.0187545	1.29e-05	0.00343417
cg03876032	10	26501065	MYO3A	rs7913502:26399648:G:C	chr10	26399648	-4.5729	-0.0187545	1.29e-05	0.00343417
cg03876032	10	26501065	MYO3A	rs10828953:26400745:A:C	chr10	26400745	-4.5729	-0.0187545	1.29e-05	0.00343417
cg03876032	10	26501065	MYO3A	rs143579657:26392182:G:A	chr10	26392182	-4.5729	-0.0187545	1.29e-05	0.00343417
cg08715231	8	25906064	NA	rs951914:25878995:G:C	chr8	25878995	-4.57228	-0.0126163	1.29e-05	0.0034411
cg13645908	17	714733	NXN	rs72477051:713043:T:C	chr17	713043	-4.57202	-0.0081093	1.29e-05	0.00344413
cg03876032	10	26501065	MYO3A	rs11014924:26328475:C:T	chr10	26328475	-4.57148	-0.0187723	1.3e-05	0.00345027
cg14377594	9	1051505	DMRT2	rs10959121	chr9	1057555	-4.57093	-0.0257655	1.3e-05	0.00345667
cg16386080	9	90589146	CDK20	rs111801686:90599785:A:G	chr9	90599785	4.56869	0.0111681	1.31e-05	0.00348281
cg03876032	10	26501065	MYO3A	rs1856603:26327467:G:A	chr10	26327467	-4.56825	-0.0187411	1.31e-05	0.00348793
cg03876032	10	26501065	MYO3A	rs12262670:26328965:G:T	chr10	26328965	-4.56825	-0.0187411	1.31e-05	0.00348793
cg03876032	10	26501065	MYO3A	rs12247650:26341581:G:T	chr10	26341581	-4.56825	-0.0187411	1.31e-05	0.00348793
cg03876032	10	26501065	MYO3A	rs11014925:26337375:C:T	chr10	26337375	-4.56825	-0.0187411	1.31e-05	0.00348793
cg03876032	10	26501065	MYO3A	rs7899567:26343197:G:A	chr10	26343197	-4.56825	-0.0187411	1.31e-05	0.00348793
cg03876032	10	26501065	MYO3A	rs12572695:26337198:A:C	chr10	26337198	-4.56825	-0.0187411	1.31e-05	0.00348793
cg03876032	10	26501065	MYO3A	rs1949616:26330581:G:T	chr10	26330581	-4.56825	-0.0187411	1.31e-05	0.00348793
cg03876032	10	26501065	MYO3A	rs7899450:26343164:G:A	chr10	26343164	-4.56825	-0.0187411	1.31e-05	0.00348793
cg03876032	10	26501065	MYO3A	rs12768268:26342170:C:T	chr10	26342170	-4.56825	-0.0187411	1.31e-05	0.00348793
cg26112929	7	5821500	RNF216	rs35249598:5823834:T:C	chr7	5823834	4.55504	0.010054	1.38e-05	0.00364658
cg23779890	8	75262522	GDAP1	rs12679070:75347510:A:C	chr8	75347510	4.55476	0.0118008	1.38e-05	0.00365009
cg26726141	17	64612159	PRKCA	rs12451252	chr17	64611156	4.55451	0.0266498	1.39e-05	0.00365319
cg05725804	5	114516219	TRIM36	rs10036096:114081884:C:A	chr5	114081884	4.54958	0.0108596	1.41e-05	0.00371445
cg00603274	11	61596626	FADS2	rs174627:61637466:G:A	chr11	61637466	4.54554	0.0133963	1.44e-05	0.00376559
cg00603274	11	61596626	FADS2	rs174564:61588305:A:G	chr11	61588305	4.54263	0.0098097	1.45e-05	0.00380306
cg03876032	10	26501065	MYO3A	rs12267297:26320808:G:T	chr10	26320808	-4.53956	-0.0186548	1.47e-05	0.00384275
cg03876032	10	26501065	MYO3A	rs10828925:26280727:G:A	chr10	26280727	-4.53738	-0.0198265	1.48e-05	0.00387094
cg03876032	10	26501065	MYO3A	rs10828924:26280724:G:C	chr10	26280724	-4.53738	-0.0198265	1.48e-05	0.00387094
cg00479208	22	50656893	TUBGCP6	rs147128719:50194998:G:A	chr22	50194998	4.53334	0.014869	1.51e-05	0.00392447
cg23598080	1	180204499	LHX4	rs78141698:180201366:A:G	chr1	180201366	-4.52839	-0.0167836	1.54e-05	0.00399046
cg00603274	11	61596626	FADS2	rs174538	chr11	61560081	4.52749	0.00975247	1.54e-05	0.0040024
cg13154880	4	48486472	SLC10A4	rs6836632	chr4	48485075	-4.52738	-0.0136364	1.54e-05	0.0040037
cg13154880	4	48486472	SLC10A4	rs11945562:48486598:C:T	chr4	48486598	-4.52738	-0.0136364	1.54e-05	0.0040037
cg23779890	8	75262522	GDAP1	rs13264470:75352431:A:C	chr8	75352431	4.5265	0.0117426	1.55e-05	0.00401592
cg03876032	10	26501065	MYO3A	rs1361376:26319885:A:G	chr10	26319885	-4.52588	-0.0186116	1.55e-05	0.00402424
cg23598080	1	180204499	LHX4	rs11578977:180200901:T:C	chr1	180200901	-4.52109	-0.0167659	1.58e-05	0.00409047
cg23779890	8	75262522	GDAP1	rs10093795:75355842:C:A	chr8	75355842	4.51853	0.0117662	1.6e-05	0.0041257
cg00603274	11	61596626	FADS2	rs174584:61610750:G:A	chr11	61610750	4.51635	0.00978323	1.61e-05	0.00415571
cg03876032	10	26501065	MYO3A	rs12770421:26359566:T:G	chr10	26359566	-4.51549	-0.0185785	1.62e-05	0.0041679
cg15995695	1	179334675	AXDND1	rs12742172:179370973:G:A	chr1	179370973	4.514	0.0166754	1.63e-05	0.00418868
cg14305560	9	139487958	NA	rs117272953:139237054:G:T	chr9	139237054	4.50585	0.0160554	1.68e-05	0.00430423
cg03876032	10	26501065	MYO3A	rs1339812:26318161:C:T	chr10	26318161	-4.49913	-0.0185237	1.73e-05	0.00440292
cg16386080	9	90589146	CDK20	rs607314:90610716:T:C	chr9	90610716	4.49879	0.0100382	1.73e-05	0.00440795
cg16386080	9	90589146	CDK20	rs549853:90609104:T:C	chr9	90609104	4.49676	0.0105237	1.74e-05	0.00443831
cg13645908	17	714733	NXN	rs73285781:713148:C:G	chr17	713148	-4.49614	-0.0080206	1.75e-05	0.00444775
cg03876032	10	26501065	MYO3A	rs1339809:26324050:C:A	chr10	26324050	-4.49457	-0.018562	1.76e-05	0.00447085
cg13645908	17	714733	NXN	rs75211558:713132:A:C	chr17	713132	-4.49346	-0.0079992	1.77e-05	0.0044876
cg16386080	9	90589146	CDK20	rs11142035:90611270:T:G	chr9	90611270	4.49157	0.0100333	1.78e-05	0.00451604
cg16386080	9	90589146	CDK20	rs583896:90596666:G:A	chr9	90596666	4.49157	0.0100333	1.78e-05	0.00451604
cg16386080	9	90589146	CDK20	rs545985:90608644:A:G	chr9	90608644	4.49157	0.0100333	1.78e-05	0.00451604
cg16386080	9	90589146	CDK20	rs539011:90596578:C:T	chr9	90596578	4.49157	0.0100333	1.78e-05	0.00451604
cg16386080	9	90589146	CDK20	rs1854838:90609372:C:T	chr9	90609372	4.49157	0.0100333	1.78e-05	0.00451604
cg16386080	9	90589146	CDK20	rs10868676:90605761:T:G	chr9	90605761	4.49157	0.0100333	1.78e-05	0.00451604
cg16386080	9	90589146	CDK20	rs565534:90613788:G:A	chr9	90613788	4.49157	0.0100333	1.78e-05	0.00451604
cg16386080	9	90589146	CDK20	rs4517215:90600191:G:T	chr9	90600191	4.49157	0.0100333	1.78e-05	0.00451604
cg16386080	9	90589146	CDK20	rs584280:90596719:A:T	chr9	90596719	4.49157	0.0100333	1.78e-05	0.00451604
cg16386080	9	90589146	CDK20	rs10780882:90604262:G:A	chr9	90604262	4.49157	0.0100333	1.78e-05	0.00451604
cg16386080	9	90589146	CDK20	rs615737:90599172:A:G	chr9	90599172	4.49157	0.0100333	1.78e-05	0.00451604
cg16386080	9	90589146	CDK20	rs473082	chr9	90603115	4.49157	0.0100333	1.78e-05	0.00451604
cg16386080	9	90589146	CDK20	rs6560048:90601641:A:G	chr9	90601641	4.49157	0.0100333	1.78e-05	0.00451604
cg16386080	9	90589146	CDK20	rs572992	chr9	90590650	4.49157	0.0100333	1.78e-05	0.00451604
cg16386080	9	90589146	CDK20	rs482894:90607759:C:T	chr9	90607759	4.49157	0.0100333	1.78e-05	0.00451604
cg16386080	9	90589146	CDK20	rs689068:90602912:C:A	chr9	90602912	4.49157	0.0100333	1.78e-05	0.00451604
cg16386080	9	90589146	CDK20	rs652529	chr9	90613915	4.49157	0.0100333	1.78e-05	0.00451604
cg16386080	9	90589146	CDK20	rs1576641:90604894:T:C	chr9	90604894	4.49157	0.0100333	1.78e-05	0.00451604
cg16386080	9	90589146	CDK20	rs7026658:90612012:A:T	chr9	90612012	4.49157	0.0100333	1.78e-05	0.00451604
cg16386080	9	90589146	CDK20	rs4097598	chr9	90601254	4.49157	0.0100333	1.78e-05	0.00451604
cg16386080	9	90589146	CDK20	rs10780881:90600838:A:G	chr9	90600838	4.49157	0.0100333	1.78e-05	0.00451604
cg16386080	9	90589146	CDK20	rs637199:90612849:G:T	chr9	90612849	4.49157	0.0100333	1.78e-05	0.00451604
cg16386080	9	90589146	CDK20	rs2989491:90599442:A:G	chr9	90599442	4.48613	0.0100308	1.82e-05	0.00459883
cg26112929	7	5821500	RNF216	rs35604390:5825238:C:T	chr7	5825238	4.4842	0.00995275	1.83e-05	0.00462815
cg03876032	10	26501065	MYO3A	rs1416860:26313337:G:A	chr10	26313337	-4.48268	-0.0184817	1.84e-05	0.00465175
cg15995695	1	179334675	AXDND1	rs4418554:179406476:T:A	chr1	179406476	4.48091	0.0168984	1.86e-05	0.004679
cg16386080	9	90589146	CDK20	rs2989492:90599504:G:A	chr9	90599504	4.48072	0.0100205	1.86e-05	0.00468177
cg03876032	10	26501065	MYO3A	rs12572400:26312475:G:A	chr10	26312475	-4.47946	-0.0184579	1.87e-05	0.00470154
cg03876032	10	26501065	MYO3A	rs1339816:26312425:C:T	chr10	26312425	-4.4793	-0.0184574	1.87e-05	0.00470414
cg03876032	10	26501065	MYO3A	rs1339815:26312458:G:C	chr10	26312458	-4.4793	-0.0184574	1.87e-05	0.00470414
cg03876032	10	26501065	MYO3A	rs1339814:26312824:G:A	chr10	26312824	-4.47921	-0.0184566	1.87e-05	0.00470555
cg03876032	10	26501065	MYO3A	rs1339813:26313980:G:A	chr10	26313980	-4.47912	-0.0184558	1.87e-05	0.00470699
cg18400845	11	31837960	PAX6	rs72908270:32277178:A:G	chr11	32277178	-4.47759	-0.0141953	1.88e-05	0.0047311
cg23598080	1	180204499	LHX4	rs355619:180195733:T:C	chr1	180195733	-4.47712	-0.0112131	1.88e-05	0.00473854
cg15995695	1	179334675	AXDND1	rs2152319	chr1	179315357	-4.47095	-0.0164159	1.93e-05	0.00483764
cg15995695	1	179334675	AXDND1	rs11333365:179380994:T:A	chr1	179380994	4.46758	0.0167467	1.96e-05	0.00489302
cg16386080	9	90589146	CDK20	rs576555:90589502:G:C	chr9	90589502	4.46483	0.00999724	1.98e-05	0.00493803
cg13645908	17	714733	NXN	rs62070004:713391:C:G	chr17	713391	-4.45885	-0.0078882	2.02e-05	0.00503693
cg07758738	18	12911528	NA	rs908578:12891725:T:A	chr18	12891725	-4.45158	-0.0215031	2.08e-05	0.00516016
cg08715231	8	25906064	NA	rs4872389	chr8	25909499	4.45008	0.0130648	2.1e-05	0.00518602
cg16386080	9	90589146	CDK20	rs7037470:90602090:G:C	chr9	90602090	4.44994	0.00991203	2.1e-05	0.00518842
cg00603274	11	61596626	FADS2	rs174583	chr11	61609750	4.4441	0.00963115	2.15e-05	0.00528757
cg15995695	1	179334675	AXDND1	rs4651028:179407523:A:G	chr1	179407523	4.44292	0.0167553	2.16e-05	0.0053087
cg00603274	11	61596626	FADS2	rs174562:61585144:A:G	chr11	61585144	4.44289	0.00966244	2.16e-05	0.00530917
cg15995695	1	179334675	AXDND1	rs12749810:179373287:T:G	chr1	179373287	4.44148	0.0167513	2.17e-05	0.00533422
cg16386080	9	90589146	CDK20	rs12351637:90630971:T:C	chr9	90630971	-4.44138	-0.0096362	2.17e-05	0.00533599
cg00603274	11	61596626	FADS2	rs174598:61621194:G:A	chr11	61621194	4.44098	0.00982208	2.17e-05	0.00534333
cg16386080	9	90589146	CDK20	rs12337503:90630798:A:G	chr9	90630798	-4.44098	-0.0096363	2.17e-05	0.00534344
cg15995695	1	179334675	AXDND1	rs11582293:179412377:C:G	chr1	179412377	4.44069	0.0167482	2.17e-05	0.00534836
cg15995695	1	179334675	AXDND1	rs10913760:179412386:G:A	chr1	179412386	4.44069	0.0167482	2.17e-05	0.00534836
cg15995695	1	179334675	AXDND1	rs58836785:179416346:T:C	chr1	179416346	4.44061	0.0167482	2.18e-05	0.00534955
cg15995695	1	179334675	AXDND1	rs61821011:179416241:A:G	chr1	179416241	4.44061	0.0167482	2.18e-05	0.00534955
cg15995695	1	179334675	AXDND1	rs12729895:179411422:G:A	chr1	179411422	4.44061	0.0167482	2.18e-05	0.00534955
cg15995695	1	179334675	AXDND1	rs4454499:179409591:C:G	chr1	179409591	4.44061	0.0167482	2.18e-05	0.00534955
cg15995695	1	179334675	AXDND1	rs11802625:179410094:G:A	chr1	179410094	4.44061	0.0167482	2.18e-05	0.00534955
cg15995695	1	179334675	AXDND1	rs12758415:179387050:T:C	chr1	179387050	4.44061	0.0167482	2.18e-05	0.00534955
cg15995695	1	179334675	AXDND1	rs11811198:179397523:T:C	chr1	179397523	4.44061	0.0167482	2.18e-05	0.00534955
cg15995695	1	179334675	AXDND1	rs56837493:179416335:C:T	chr1	179416335	4.44061	0.0167482	2.18e-05	0.00534955
cg15995695	1	179334675	AXDND1	rs4233180:179372286:A:G	chr1	179372286	4.44061	0.0167482	2.18e-05	0.00534955
cg15995695	1	179334675	AXDND1	rs11802862:179397933:C:A	chr1	179397933	4.44061	0.0167482	2.18e-05	0.00534955
cg15995695	1	179334675	AXDND1	rs11802624:179410090:G:A	chr1	179410090	4.44061	0.0167482	2.18e-05	0.00534955
cg15995695	1	179334675	AXDND1	rs12746612:179376654:C:T	chr1	179376654	4.44061	0.0167482	2.18e-05	0.00534955
cg15995695	1	179334675	AXDND1	rs12727075:179382042:A:G	chr1	179382042	4.44061	0.0167482	2.18e-05	0.00534955
cg15995695	1	179334675	AXDND1	rs10913762:179412525:T:C	chr1	179412525	4.44061	0.0167482	2.18e-05	0.00534955
cg15995695	1	179334675	AXDND1	rs11586744:179386253:T:C	chr1	179386253	4.44061	0.0167482	2.18e-05	0.00534955
cg15995695	1	179334675	AXDND1	rs138209416:179388149:C:T	chr1	179388149	4.44061	0.0167482	2.18e-05	0.00534955
cg15995695	1	179334675	AXDND1	rs7513973:179394212:T:A	chr1	179394212	4.44061	0.0167482	2.18e-05	0.00534955
cg15995695	1	179334675	AXDND1	rs7551894:179396822:C:G	chr1	179396822	4.44061	0.0167482	2.18e-05	0.00534955
cg15995695	1	179334675	AXDND1	rs4652375:179371781:A:G	chr1	179371781	4.44061	0.0167482	2.18e-05	0.00534955
cg15995695	1	179334675	AXDND1	rs12757935:179392930:A:C	chr1	179392930	4.44061	0.0167482	2.18e-05	0.00534955
cg15995695	1	179334675	AXDND1	rs4130266	chr1	179415532	4.44061	0.0167482	2.18e-05	0.00534955
cg15995695	1	179334675	AXDND1	rs12722736:179415227:G:T	chr1	179415227	4.44061	0.0167482	2.18e-05	0.00534955
cg15995695	1	179334675	AXDND1	rs12744251:179411977:G:A	chr1	179411977	4.44061	0.0167482	2.18e-05	0.00534955
cg15995695	1	179334675	AXDND1	rs4345774:179376524:G:A	chr1	179376524	4.44061	0.0167482	2.18e-05	0.00534955
cg15995695	1	179334675	AXDND1	rs12729775:179410693:C:T	chr1	179410693	4.44061	0.0167482	2.18e-05	0.00534955
cg15995695	1	179334675	AXDND1	rs11578241:179412124:G:C	chr1	179412124	4.44061	0.0167482	2.18e-05	0.00534955
cg15995695	1	179334675	AXDND1	rs7532155:179415937:T:C	chr1	179415937	4.44061	0.0167482	2.18e-05	0.00534955
cg15995695	1	179334675	AXDND1	rs12409337:179392000:G:A	chr1	179392000	4.44061	0.0167482	2.18e-05	0.00534955
cg15995695	1	179334675	AXDND1	rs9662026:179393803:G:T	chr1	179393803	4.44061	0.0167482	2.18e-05	0.00534955
cg15995695	1	179334675	AXDND1	rs12723024:179375852:A:G	chr1	179375852	4.44061	0.0167482	2.18e-05	0.00534955
cg15995695	1	179334675	AXDND1	rs10913761:179412443:A:G	chr1	179412443	4.44061	0.0167482	2.18e-05	0.00534955
cg15995695	1	179334675	AXDND1	rs4652379:179395375:T:C	chr1	179395375	4.44061	0.0167482	2.18e-05	0.00534955
cg15995695	1	179334675	AXDND1	rs4651027:179395451:A:G	chr1	179395451	4.44061	0.0167482	2.18e-05	0.00534955
cg15995695	1	179334675	AXDND1	rs7550736:179401599:C:T	chr1	179401599	4.44061	0.0167482	2.18e-05	0.00534955
cg15995695	1	179334675	AXDND1	rs4626840:179376161:C:T	chr1	179376161	4.44061	0.0167482	2.18e-05	0.00534955
cg15995695	1	179334675	AXDND1	rs12746452:179377236:G:A	chr1	179377236	4.44061	0.0167482	2.18e-05	0.00534955
cg15995695	1	179334675	AXDND1	rs11582255:179412144:C:T	chr1	179412144	4.44061	0.0167482	2.18e-05	0.00534955
cg15995695	1	179334675	AXDND1	rs4651026:179395448:A:G	chr1	179395448	4.44061	0.0167482	2.18e-05	0.00534955
cg15995695	1	179334675	AXDND1	rs4625244:179373771:A:C	chr1	179373771	4.44061	0.0167482	2.18e-05	0.00534955
cg15995695	1	179334675	AXDND1	rs4366280:179409018:T:G	chr1	179409018	4.44061	0.0167482	2.18e-05	0.00534955
cg15995695	1	179334675	AXDND1	rs12756900:179378925:G:A	chr1	179378925	4.44061	0.0167482	2.18e-05	0.00534955
cg15995695	1	179334675	AXDND1	rs12757695:179378743:C:T	chr1	179378743	4.44061	0.0167482	2.18e-05	0.00534955
cg15995695	1	179334675	AXDND1	rs12727704:179382426:A:T	chr1	179382426	4.44061	0.0167482	2.18e-05	0.00534955
cg15995695	1	179334675	AXDND1	rs12401957:179413468:A:C	chr1	179413468	4.44061	0.0167482	2.18e-05	0.00534955
cg15995695	1	179334675	AXDND1	rs36046838:179385529:T:A	chr1	179385529	4.44061	0.0167482	2.18e-05	0.00534955
cg15995695	1	179334675	AXDND1	rs4652383:179398875:T:A	chr1	179398875	4.44061	0.0167482	2.18e-05	0.00534955
cg15995695	1	179334675	AXDND1	rs7554103:179393930:A:G	chr1	179393930	4.44061	0.0167482	2.18e-05	0.00534955
cg15995695	1	179334675	AXDND1	rs11577579	chr1	179414105	4.44061	0.0167482	2.18e-05	0.00534955
cg15995695	1	179334675	AXDND1	rs11582754:179412886:C:G	chr1	179412886	4.44061	0.0167482	2.18e-05	0.00534955
cg15995695	1	179334675	AXDND1	rs12741747:179375979:C:G	chr1	179375979	4.44061	0.0167482	2.18e-05	0.00534955
cg15995695	1	179334675	AXDND1	rs12744535:179372545:A:G	chr1	179372545	4.44061	0.0167482	2.18e-05	0.00534955
cg15995695	1	179334675	AXDND1	rs4562582:179373655:C:A	chr1	179373655	4.44061	0.0167482	2.18e-05	0.00534955
cg15995695	1	179334675	AXDND1	rs12409903:179402340:A:G	chr1	179402340	4.44061	0.0167482	2.18e-05	0.00534955
cg15995695	1	179334675	AXDND1	rs7550656:179401559:C:T	chr1	179401559	4.44061	0.0167482	2.18e-05	0.00534955
cg15995695	1	179334675	AXDND1	rs12730070:179410843:C:T	chr1	179410843	4.44061	0.0167482	2.18e-05	0.00534955
cg15995695	1	179334675	AXDND1	rs12738920:179378451:T:G	chr1	179378451	4.44061	0.0167482	2.18e-05	0.00534955
cg15995695	1	179334675	AXDND1	rs12407502:179383839:T:C	chr1	179383839	4.44061	0.0167482	2.18e-05	0.00534955
cg15995695	1	179334675	AXDND1	rs12757723:179378791:C:A	chr1	179378791	4.44061	0.0167482	2.18e-05	0.00534955
cg15995695	1	179334675	AXDND1	rs7513782:179393986:T:C	chr1	179393986	4.44061	0.0167482	2.18e-05	0.00534955
cg15995695	1	179334675	AXDND1	rs12410988:179383811:C:T	chr1	179383811	4.44061	0.0167482	2.18e-05	0.00534955
cg15995695	1	179334675	AXDND1	rs12408443:179391910:T:C	chr1	179391910	4.44061	0.0167482	2.18e-05	0.00534955
cg15995695	1	179334675	AXDND1	rs143342673:179388504:C:T	chr1	179388504	4.44061	0.0167482	2.18e-05	0.00534955
cg15995695	1	179334675	AXDND1	rs12755534:179391341:G:T	chr1	179391341	4.44061	0.0167482	2.18e-05	0.00534955
cg15995695	1	179334675	AXDND1	rs12729491:179416484:C:A	chr1	179416484	4.44061	0.0167482	2.18e-05	0.00534955
cg15995695	1	179334675	AXDND1	rs12730909:179404152:C:T	chr1	179404152	4.44061	0.0167482	2.18e-05	0.00534955
cg15995695	1	179334675	AXDND1	rs10913766	chr1	179416956	4.44061	0.0167482	2.18e-05	0.00534955
cg15995695	1	179334675	AXDND1	rs7521106:179399388:G:A	chr1	179399388	4.44061	0.0167482	2.18e-05	0.00534955
cg15995695	1	179334675	AXDND1	rs10913755:179408411:A:C	chr1	179408411	4.44061	0.0167482	2.18e-05	0.00534955
cg15995695	1	179334675	AXDND1	rs10913753:179400260:A:G	chr1	179400260	4.44061	0.0167482	2.18e-05	0.00534955
cg15995695	1	179334675	AXDND1	rs10913752:179400125:G:A	chr1	179400125	4.44061	0.0167482	2.18e-05	0.00534955
cg15995695	1	179334675	AXDND1	rs12738929:179417524:C:G	chr1	179417524	4.44036	0.0167385	2.18e-05	0.0053542
cg15995695	1	179334675	AXDND1	rs10913768:179417101:T:G	chr1	179417101	4.44023	0.0167473	2.18e-05	0.00535657
cg15995695	1	179334675	AXDND1	rs10913767:179417068:A:G	chr1	179417068	4.44023	0.0167473	2.18e-05	0.00535657
cg07758738	18	12911528	NA	rs908579:12891550:T:A	chr18	12891550	-4.43931	-0.021453	2.19e-05	0.00537237
cg15995695	1	179334675	AXDND1	rs12724496:179417549:T:C	chr1	179417549	4.43857	0.0167435	2.19e-05	0.00538486
cg15995695	1	179334675	AXDND1	rs12724634:179417614:T:C	chr1	179417614	4.43808	0.0167424	2.2e-05	0.00539366
cg15995695	1	179334675	AXDND1	rs12739116:179417682:C:G	chr1	179417682	4.43789	0.0167419	2.2e-05	0.00539718
cg15995695	1	179334675	AXDND1	rs12406974:179377544:A:G	chr1	179377544	4.43737	0.0167431	2.2e-05	0.00540647
cg05725804	5	114516219	TRIM36	rs1402026	chr5	114083489	4.43726	0.0103602	2.2e-05	0.00540848
cg15995695	1	179334675	AXDND1	rs10913769:179418056:G:T	chr1	179418056	4.43564	0.0167366	2.22e-05	0.00543803
cg15995695	1	179334675	AXDND1	rs10913770:179418132:C:T	chr1	179418132	4.43475	0.0167346	2.23e-05	0.005454
cg15995695	1	179334675	AXDND1	rs10913771:179418181:T:C	chr1	179418181	4.43436	0.0167337	2.23e-05	0.00546078
cg15995695	1	179334675	AXDND1	rs11802637:179410168:G:A	chr1	179410168	4.43216	0.0167095	2.25e-05	0.00550055
cg15995695	1	179334675	AXDND1	rs10913754:179400384:C:T	chr1	179400384	4.43064	0.016707	2.26e-05	0.00552799
cg15995695	1	179334675	AXDND1	rs4330884:179373498:A:C	chr1	179373498	4.42769	0.0166054	2.29e-05	0.00558137
cg08376141	6	32116591	PRRT1	rs34950344:32542440:T:A	chr6	32542440	4.42768	0.0432324	2.29e-05	0.0055815
cg15995695	1	179334675	AXDND1	rs12744976:179418990:C:T	chr1	179418990	4.42582	0.0167134	2.31e-05	0.00561651
cg00603274	11	61596626	FADS2	rs174592:61618608:A:G	chr11	61618608	4.42555	0.00946973	2.31e-05	0.00562156
cg15995695	1	179334675	AXDND1	rs35045558:179585021:A:G	chr1	179585021	-4.42354	-0.0205965	2.33e-05	0.00565841
cg15995695	1	179334675	AXDND1	rs34227848:179419689:T:A	chr1	179419689	4.41876	0.0166961	2.37e-05	0.00574627
cg05700079	3	147126961	ZIC1	rs73149974:147302412:C:T	chr3	147302412	4.41574	0.0185811	2.4e-05	0.00580319
cg05700079	3	147126961	ZIC1	rs73149973:147302194:C:T	chr3	147302194	4.41555	0.0185811	2.4e-05	0.0058067
cg00603274	11	61596626	FADS2	rs174600:61622227:T:C	chr11	61622227	4.41535	0.00977472	2.4e-05	0.00581056
cg00425710	16	56672671	MT1A	rs6499846:56662357:G:A	chr16	56662357	-4.41451	-0.0344742	2.41e-05	0.00582664
cg15995695	1	179334675	AXDND1	rs12750591:179420095:C:G	chr1	179420095	4.41439	0.0166849	2.41e-05	0.00582902
cg15995695	1	179334675	AXDND1	rs12749554:179420112:G:C	chr1	179420112	4.41418	0.0166844	2.41e-05	0.00583302
cg13645908	17	714733	NXN	rs2474690:722135:A:G	chr17	722135	-4.41391	-0.0078316	2.42e-05	0.00583821
cg00603274	11	61596626	FADS2	rs174554:61579463:A:G	chr11	61579463	4.41287	0.00953724	2.43e-05	0.00585822
cg00425710	16	56672671	MT1A	rs1604122:56663300:C:G	chr16	56663300	4.40814	0.034434	2.47e-05	0.00594937
cg00603274	11	61596626	FADS2	rs174553:61575158:A:G	chr11	61575158	4.40812	0.00952618	2.47e-05	0.00594971
cg00603274	11	61596626	FADS2	rs174537:61552680:G:T	chr11	61552680	4.40744	0.00952459	2.48e-05	0.00596286
cg00603274	11	61596626	FADS2	rs174547	chr11	61570783	4.40744	0.00952459	2.48e-05	0.00596286
cg00603274	11	61596626	FADS2	rs174536:61551927:A:C	chr11	61551927	4.40744	0.00952459	2.48e-05	0.00596286
cg00603274	11	61596626	FADS2	rs174550	chr11	61571478	4.40744	0.00952459	2.48e-05	0.00596286
cg00603274	11	61596626	FADS2	rs174545:61569306:C:G	chr11	61569306	4.40744	0.00952459	2.48e-05	0.00596286
cg00603274	11	61596626	FADS2	rs174535	chr11	61551356	4.40744	0.00952459	2.48e-05	0.00596286
cg00603274	11	61596626	FADS2	rs174546	chr11	61569830	4.40744	0.00952459	2.48e-05	0.00596286
cg00603274	11	61596626	FADS2	rs174551:61573684:T:C	chr11	61573684	4.407	0.00952398	2.48e-05	0.00597108
cg00603274	11	61596626	FADS2	rs102274:61557826:T:C	chr11	61557826	4.407	0.0095234	2.48e-05	0.00597122
cg13645908	17	714733	NXN	rs66931010:713571:A:G	chr17	713571	-4.40583	-0.0078273	2.49e-05	0.00599443
cg05700079	3	147126961	ZIC1	rs59647999:147299650:C:T	chr3	147299650	4.40197	0.0184881	2.53e-05	0.00607093
cg00603274	11	61596626	FADS2	rs174594:61619829:C:A	chr11	61619829	-4.40189	-0.0093166	2.53e-05	0.00607256
cg02225085	5	87975992	LINC00461	rs17558396	chr5	88102281	-4.39274	-0.0146847	2.62e-05	0.00625877
cg23598080	1	180204499	LHX4	rs80318504:180197528:T:C	chr1	180197528	-4.39253	-0.0163858	2.63e-05	0.00626307
cg02225085	5	87975992	LINC00461	rs10462335:88088204:G:A	chr5	88088204	-4.39158	-0.0146803	2.64e-05	0.00628286
cg00603274	11	61596626	FADS2	rs174533:61549025:G:A	chr11	61549025	4.391	0.00951223	2.64e-05	0.00629475
cg13645908	17	714733	NXN	rs66796300:713669:T:G	chr17	713669	-4.38994	-0.0078041	2.65e-05	0.00631724
cg00603274	11	61596626	FADS2	rs174599:61621556:G:C	chr11	61621556	4.3888	0.009455	2.66e-05	0.0063409
cg13645908	17	714733	NXN	rs66799033:713683:A:G	chr17	713683	-4.3876	-0.0078004	2.68e-05	0.0063658
cg15995695	1	179334675	AXDND1	rs12411074:179644615:C:T	chr1	179644615	-4.38703	-0.0204052	2.68e-05	0.00637763
cg11028201	4	41867562	NA	rs11721973:42193899:C:T	chr4	42193899	-4.38167	-0.0251263	2.74e-05	0.00648981
cg02225085	5	87975992	LINC00461	rs170023:88203600:T:A	chr5	88203600	4.37848	0.0168663	2.77e-05	0.00655768
cg15995695	1	179334675	AXDND1	rs12730594:179421562:G:A	chr1	179421562	4.37839	0.0165886	2.77e-05	0.00655966
cg08715231	8	25906064	NA	rs7008914	chr8	25880400	4.37832	0.0129054	2.78e-05	0.0065611
cg02225085	5	87975992	LINC00461	rs13155750	chr5	88167641	4.37632	0.0181577	2.8e-05	0.00660436
cg15995695	1	179334675	AXDND1	rs12732094:179421747:C:T	chr1	179421747	4.37294	0.0165736	2.83e-05	0.00667719
cg03876032	10	26501065	MYO3A	rs10508714:26470436:G:A	chr10	26470436	-4.3725	-0.0183091	2.84e-05	0.00668693
cg15995695	1	179334675	AXDND1	rs12758573:179370473:A:C	chr1	179370473	4.37091	0.0166922	2.86e-05	0.0067217
cg15995695	1	179334675	AXDND1	rs12724320:179370499:T:C	chr1	179370499	4.37091	0.0166922	2.86e-05	0.0067217
cg15995695	1	179334675	AXDND1	rs12758559:179370450:A:G	chr1	179370450	4.37091	0.0166922	2.86e-05	0.0067217
cg15995695	1	179334675	AXDND1	rs35577489:179561527:C:G	chr1	179561527	-4.36988	-0.0211522	2.87e-05	0.00674433
cg15995695	1	179334675	AXDND1	rs12732109:179421779:C:T	chr1	179421779	4.36404	0.0166114	2.93e-05	0.00687301
cg15995695	1	179334675	AXDND1	rs12752034:179421788:A:G	chr1	179421788	4.36382	0.0166107	2.94e-05	0.00687812
cg03876032	10	26501065	MYO3A	rs12258453:26464522:C:T	chr10	26464522	-4.36225	-0.0180473	2.95e-05	0.00691347
cg03876032	10	26501065	MYO3A	rs10764598:26464950:G:A	chr10	26464950	-4.36095	-0.0180443	2.97e-05	0.00694279
cg15995695	1	179334675	AXDND1	rs1887814	chr1	179551652	-4.36053	-0.0173114	2.97e-05	0.00695255
cg13645908	17	714733	NXN	rs480432:728102:C:A	chr17	728102	-4.36052	-0.0076872	2.97e-05	0.00695272
cg04090392	15	83952774	BNC1	rs12905955:84070327:G:A	chr15	84070327	-4.3604	-0.0155329	2.98e-05	0.00695559
cg03876032	10	26501065	MYO3A	rs11014984:26463880:A:C	chr10	26463880	-4.35911	-0.0180196	2.99e-05	0.00698544
cg23598080	1	180204499	LHX4	rs142559878:180195829:G:A	chr1	180195829	-4.35652	-0.0169076	3.02e-05	0.00704451
cg03876032	10	26501065	MYO3A	rs3758448:26463569:G:A	chr10	26463569	-4.35635	-0.0179816	3.02e-05	0.00704861
cg03876032	10	26501065	MYO3A	rs12246202:26379053:A:C	chr10	26379053	-4.356	-0.0179768	3.03e-05	0.00705627
cg03876032	10	26501065	MYO3A	rs7895318:26423091:A:G	chr10	26423091	-4.356	-0.0179768	3.03e-05	0.00705627
cg03876032	10	26501065	MYO3A	rs115497356:26389010:A:G	chr10	26389010	-4.356	-0.0179768	3.03e-05	0.00705627
cg03876032	10	26501065	MYO3A	rs1546701:26375658:G:A	chr10	26375658	-4.356	-0.0179768	3.03e-05	0.00705627
cg03876032	10	26501065	MYO3A	rs11593041:26453392:C:T	chr10	26453392	-4.356	-0.0179768	3.03e-05	0.00705627
cg03876032	10	26501065	MYO3A	rs2090797:26374086:C:T	chr10	26374086	-4.356	-0.0179768	3.03e-05	0.00705627
cg03876032	10	26501065	MYO3A	rs12263990:26407408:C:G	chr10	26407408	-4.356	-0.0179768	3.03e-05	0.00705627
cg03876032	10	26501065	MYO3A	rs12266221:26366000:G:A	chr10	26366000	-4.356	-0.0179768	3.03e-05	0.00705627
cg03876032	10	26501065	MYO3A	rs7476324	chr10	26441430	-4.356	-0.0179768	3.03e-05	0.00705627
cg03876032	10	26501065	MYO3A	rs9629915:26368452:C:T	chr10	26368452	-4.356	-0.0179768	3.03e-05	0.00705627
cg03876032	10	26501065	MYO3A	rs12258401:26451902:G:A	chr10	26451902	-4.356	-0.0179768	3.03e-05	0.00705627
cg03876032	10	26501065	MYO3A	rs3740232	chr10	26462790	-4.356	-0.0179768	3.03e-05	0.00705627
cg03876032	10	26501065	MYO3A	rs10082469:26428315:T:A	chr10	26428315	-4.356	-0.0179768	3.03e-05	0.00705627
cg03876032	10	26501065	MYO3A	rs12262728:26454188:G:A	chr10	26454188	-4.356	-0.0179768	3.03e-05	0.00705627
cg03876032	10	26501065	MYO3A	rs7072451:26455933:T:C	chr10	26455933	-4.356	-0.0179768	3.03e-05	0.00705627
cg03876032	10	26501065	MYO3A	rs1342320	chr10	26457536	-4.356	-0.0179768	3.03e-05	0.00705627
cg03876032	10	26501065	MYO3A	rs949896:26326437:T:C	chr10	26326437	-4.3544	-0.0179764	3.05e-05	0.00709303
cg15995695	1	179334675	AXDND1	rs3829795	chr1	179545669	-4.35212	-0.0175434	3.07e-05	0.00714632
cg15995695	1	179334675	AXDND1	rs1887816	chr1	179548267	-4.35212	-0.0175434	3.07e-05	0.00714632
cg14377594	9	1051505	DMRT2	rs115043711:1050386:C:T	chr9	1050386	-4.35181	-0.0286723	3.08e-05	0.00715317
cg03876032	10	26501065	MYO3A	rs12766250:26341834:G:C	chr10	26341834	-4.35141	-0.017963	3.08e-05	0.00716221
cg03876032	10	26501065	MYO3A	rs1915478:26330218:T:G	chr10	26330218	-4.35141	-0.017963	3.08e-05	0.00716221
cg03876032	10	26501065	MYO3A	rs1339808:26324110:T:C	chr10	26324110	-4.35119	-0.0179624	3.08e-05	0.00716723
cg00603274	11	61596626	FADS2	rs174601:61623140:C:T	chr11	61623140	4.35054	0.00949285	3.09e-05	0.00718285
cg00603274	11	61596626	FADS2	rs174534:61549458:A:G	chr11	61549458	4.35031	0.00936881	3.09e-05	0.00718835
cg16386080	9	90589146	CDK20	rs10780887	chr9	90650132	-4.34785	-0.0093798	3.12e-05	0.00724651
cg03876032	10	26501065	MYO3A	rs4539209:26467317:C:A	chr10	26467317	-4.34541	-0.018128	3.15e-05	0.0073055
cg03876032	10	26501065	MYO3A	rs35311015:26369529:C:T	chr10	26369529	-4.33875	-0.0179887	3.24e-05	0.00746578
cg03876032	10	26501065	MYO3A	rs11819592:26422407:G:A	chr10	26422407	-4.33872	-0.0179513	3.24e-05	0.00746644
cg03876032	10	26501065	MYO3A	rs3737275	chr10	26310410	-4.33761	-0.0186274	3.25e-05	0.00749359
cg08715231	8	25906064	NA	rs4612354:25916018:T:C	chr8	25916018	-4.33247	-0.0116707	3.32e-05	0.00761894
cg13645908	17	714733	NXN	rs686942:716542:G:C	chr17	716542	-4.32862	-0.0077421	3.37e-05	0.00771335
cg05467160	2	176945526	EVX2	rs726033:176657253:C:A	chr2	176657253	4.32499	0.0170661	3.41e-05	0.00780405
cg00425710	16	56672671	MT1A	rs11647171:56673249:T:C	chr16	56673249	4.31567	0.0186419	3.54e-05	0.00804148
cg13645908	17	714733	NXN	rs28877683:732887:G:A	chr17	732887	-4.31534	-0.0075868	3.54e-05	0.00805055
cg13154880	4	48486472	SLC10A4	rs6838613	chr4	48476539	4.31506	0.0132879	3.55e-05	0.00805806
cg00425710	16	56672671	MT1A	rs11640851:56673227:C:A	chr16	56673227	4.31447	0.0186291	3.55e-05	0.00807261
cg00425710	16	56672671	MT1A	rs904777:56674111:C:G	chr16	56674111	4.31425	0.0186277	3.56e-05	0.00807838
cg00425710	16	56672671	MT1A	rs56125200:56675499:G:T	chr16	56675499	4.31404	0.0186264	3.56e-05	0.0080838
cg00425710	16	56672671	MT1A	rs1599823	chr16	56675817	4.31404	0.0186264	3.56e-05	0.0080838
cg13696752	9	4662858	SPATA6L	rs77634661:4647228:C:G	chr9	4647228	-4.31211	-0.0285004	3.59e-05	0.00813431
cg03876032	10	26501065	MYO3A	rs12777444:26257197:A:G	chr10	26257197	-4.30874	-0.0184606	3.63e-05	0.00822284
cg03876032	10	26501065	MYO3A	rs9664363:26263199:C:G	chr10	26263199	-4.30779	-0.0184599	3.65e-05	0.00824812
cg26112929	7	5821500	RNF216	rs55763392:5821362:C:T	chr7	5821362	4.30706	0.0095344	3.66e-05	0.00826733
cg05467160	2	176945526	EVX2	rs7567123	chr2	176654907	4.30677	0.0161485	3.66e-05	0.00827513
cg02225085	5	87975992	LINC00461	rs304133:88212253:G:A	chr5	88212253	4.29986	0.0181304	3.76e-05	0.00846154
cg03876032	10	26501065	MYO3A	rs7900089:26387032:A:G	chr10	26387032	-4.29978	-0.0178002	3.76e-05	0.00846392
cg26112929	7	5821500	RNF216	rs28505204:5820838:G:A	chr7	5820838	4.29251	0.00950623	3.87e-05	0.00866155
cg03876032	10	26501065	MYO3A	rs17813720:26318795:G:A	chr10	26318795	-4.28915	-0.0177627	3.92e-05	0.00875516
cg23779890	8	75262522	GDAP1	rs373793704:75260465:A:T	chr8	75260465	4.28411	0.0161378	4e-05	0.00889722
cg02225085	5	87975992	LINC00461	rs770463	chr5	88194950	4.28271	0.0163326	4.02e-05	0.00893675
cg03876032	10	26501065	MYO3A	rs11014934:26345258:A:G	chr10	26345258	-4.27703	-0.0178375	4.11e-05	0.00910038
cg03876032	10	26501065	MYO3A	rs141044453:26389458:T:G	chr10	26389458	-4.27438	-0.0175845	4.15e-05	0.00917635
cg03876032	10	26501065	MYO3A	rs11014979:26453435:C:T	chr10	26453435	-4.27059	-0.0174999	4.21e-05	0.00928782
cg00182727	20	44640501	MMP9	rs6074044:44782142:C:T	chr20	44782142	4.2666	0.0110017	4.27e-05	0.00940632
cg00252781	1	179334658	AXDND1	rs34291276:179493855:G:A	chr1	179493855	4.26627	0.0187075	4.28e-05	0.0094159
cg13154880	4	48486472	SLC10A4	rs199935444	chr4	48485251	-4.26026	-0.0128623	4.38e-05	0.00959681
cg03876032	10	26501065	MYO3A	rs10828916:26246162:G:A	chr10	26246162	-4.25461	-0.0179976	4.47e-05	0.00977222
cg03876032	10	26501065	MYO3A	rs10828917	chr10	26250712	-4.25461	-0.0179976	4.47e-05	0.00977222
cg13645908	17	714733	NXN	rs554332:715759:A:G	chr17	715759	-4.25358	-0.0076624	4.49e-05	0.00980403
cg00603274	11	61596626	FADS2	rs108499	chr11	61547237	4.25178	0.00928451	4.52e-05	0.00986083
cg08715231	8	25906064	NA	rs10086575:25888110:G:A	chr8	25888110	4.24851	0.0121949	4.58e-05	0.00996458
cg15995695	1	179334675	AXDND1	rs7556346:179369814:A:G	chr1	179369814	4.24705	0.0165267	4.6e-05	0.0100129
cg15995695	1	179334675	AXDND1	rs7544777:179369813:C:T	chr1	179369813	4.24705	0.0165267	4.6e-05	0.0100129
cg15995695	1	179334675	AXDND1	rs7544786:179369837:C:G	chr1	179369837	4.24705	0.0165267	4.6e-05	0.0100129
cg15995695	1	179334675	AXDND1	rs12728680:179355802:C:T	chr1	179355802	4.24571	0.0164722	4.63e-05	0.0100559
cg15995695	1	179334675	AXDND1	rs12748264:179355429:T:C	chr1	179355429	4.24571	0.0164722	4.63e-05	0.0100559
cg13154880	4	48486472	SLC10A4	rs12503599:48541032:A:G	chr4	48541032	-4.2454	-0.0135118	4.63e-05	0.010066
cg00603274	11	61596626	FADS2	rs174581:61606683:G:A	chr11	61606683	4.24369	0.00913969	4.66e-05	0.0101205
cg15995695	1	179334675	AXDND1	rs12737345:179370334:G:A	chr1	179370334	4.24354	0.0164629	4.67e-05	0.0101251
cg03876032	10	26501065	MYO3A	rs10828927:26290065:C:G	chr10	26290065	-4.24336	-0.0182997	4.67e-05	0.0101307
cg15995695	1	179334675	AXDND1	rs12743585:179351342:T:A	chr1	179351342	4.24328	0.0164617	4.67e-05	0.0101329
cg15995695	1	179334675	AXDND1	rs12725414:179367636:G:A	chr1	179367636	4.24328	0.0164617	4.67e-05	0.0101329
cg15995695	1	179334675	AXDND1	rs12757708	chr1	179356552	4.24328	0.0164617	4.67e-05	0.0101329
cg15995695	1	179334675	AXDND1	rs12751949:179368784:A:G	chr1	179368784	4.24328	0.0164617	4.67e-05	0.0101329
cg15995695	1	179334675	AXDND1	rs12753310:179365846:G:A	chr1	179365846	4.24328	0.0164617	4.67e-05	0.0101329
cg15995695	1	179334675	AXDND1	rs11808460:179366364:C:T	chr1	179366364	4.24328	0.0164617	4.67e-05	0.0101329
cg15995695	1	179334675	AXDND1	rs12760534	chr1	179367301	4.24328	0.0164617	4.67e-05	0.0101329
cg15995695	1	179334675	AXDND1	rs12758152:179351383:C:T	chr1	179351383	4.24328	0.0164617	4.67e-05	0.0101329
cg15995695	1	179334675	AXDND1	rs12724525:179355481:C:A	chr1	179355481	4.24328	0.0164617	4.67e-05	0.0101329
cg15995695	1	179334675	AXDND1	rs12730642:179346265:C:T	chr1	179346265	4.24328	0.0164617	4.67e-05	0.0101329
cg15995695	1	179334675	AXDND1	rs12753162:179356100:T:C	chr1	179356100	4.24328	0.0164617	4.67e-05	0.0101329
cg15995695	1	179334675	AXDND1	rs12732167:179368813:C:T	chr1	179368813	4.24328	0.0164617	4.67e-05	0.0101329
cg15995695	1	179334675	AXDND1	rs12755876:179368622:T:C	chr1	179368622	4.24328	0.0164617	4.67e-05	0.0101329
cg15995695	1	179334675	AXDND1	rs12744949:179366635:T:G	chr1	179366635	4.24328	0.0164617	4.67e-05	0.0101329
cg15995695	1	179334675	AXDND1	rs12760048:179366974:C:G	chr1	179366974	4.24328	0.0164617	4.67e-05	0.0101329
cg15995695	1	179334675	AXDND1	rs11803484:179357471:G:T	chr1	179357471	4.24328	0.0164617	4.67e-05	0.0101329
cg15995695	1	179334675	AXDND1	rs11582995:179369473:A:G	chr1	179369473	4.24328	0.0164617	4.67e-05	0.0101329
cg15995695	1	179334675	AXDND1	rs12726506:179368310:G:T	chr1	179368310	4.24328	0.0164617	4.67e-05	0.0101329
cg15995695	1	179334675	AXDND1	rs6666939:179364059:G:T	chr1	179364059	4.24328	0.0164617	4.67e-05	0.0101329
cg15995695	1	179334675	AXDND1	rs7524128:179370108:G:C	chr1	179370108	4.24328	0.0164617	4.67e-05	0.0101329
cg15995695	1	179334675	AXDND1	rs11801919:179357026:A:T	chr1	179357026	4.24328	0.0164617	4.67e-05	0.0101329
cg15995695	1	179334675	AXDND1	rs12724694:179363674:A:G	chr1	179363674	4.24328	0.0164617	4.67e-05	0.0101329
cg15995695	1	179334675	AXDND1	rs12751260:179368150:T:C	chr1	179368150	4.24328	0.0164617	4.67e-05	0.0101329
cg15995695	1	179334675	AXDND1	rs12747626:179355031:T:C	chr1	179355031	4.24328	0.0164617	4.67e-05	0.0101329
cg15995695	1	179334675	AXDND1	rs12757910:179356701:T:A	chr1	179356701	4.24328	0.0164617	4.67e-05	0.0101329
cg15995695	1	179334675	AXDND1	rs12743213:179363608:C:T	chr1	179363608	4.24328	0.0164617	4.67e-05	0.0101329
cg15995695	1	179334675	AXDND1	rs10913744:179358159:C:G	chr1	179358159	4.24328	0.0164617	4.67e-05	0.0101329
cg15995695	1	179334675	AXDND1	rs117151196:179369077:A:G	chr1	179369077	4.24328	0.0164617	4.67e-05	0.0101329
cg15995695	1	179334675	AXDND1	rs12746253:179367650:A:G	chr1	179367650	4.24328	0.0164617	4.67e-05	0.0101329
cg15995695	1	179334675	AXDND1	rs12738262:179357670:G:A	chr1	179357670	4.24328	0.0164617	4.67e-05	0.0101329
cg15995695	1	179334675	AXDND1	rs4495640:179345751:T:C	chr1	179345751	4.24328	0.0164617	4.67e-05	0.0101329
cg15995695	1	179334675	AXDND1	rs12753971:179365550:C:T	chr1	179365550	4.24328	0.0164617	4.67e-05	0.0101329
cg15995695	1	179334675	AXDND1	rs10913739:179347530:C:G	chr1	179347530	4.24328	0.0164617	4.67e-05	0.0101329
cg15995695	1	179334675	AXDND1	rs12746578:179367805:A:G	chr1	179367805	4.24328	0.0164617	4.67e-05	0.0101329
cg15995695	1	179334675	AXDND1	rs12728498:179363532:T:C	chr1	179363532	4.24328	0.0164617	4.67e-05	0.0101329
cg15995695	1	179334675	AXDND1	rs11583817:179369603:T:A	chr1	179369603	4.24328	0.0164617	4.67e-05	0.0101329
cg15995695	1	179334675	AXDND1	rs4233177:179359241:C:T	chr1	179359241	4.24328	0.0164617	4.67e-05	0.0101329
cg15995695	1	179334675	AXDND1	rs12749461	chr1	179356378	4.24328	0.0164617	4.67e-05	0.0101329
cg15995695	1	179334675	AXDND1	rs12723027:179355250:G:A	chr1	179355250	4.24328	0.0164617	4.67e-05	0.0101329
cg15995695	1	179334675	AXDND1	rs7539388:179362767:C:T	chr1	179362767	4.24328	0.0164617	4.67e-05	0.0101329
cg15995695	1	179334675	AXDND1	rs7515896:179362586:G:C	chr1	179362586	4.24328	0.0164617	4.67e-05	0.0101329
cg15995695	1	179334675	AXDND1	rs12744438:179359120:G:A	chr1	179359120	4.24328	0.0164617	4.67e-05	0.0101329
cg15995695	1	179334675	AXDND1	rs12726875:179359073:A:G	chr1	179359073	4.24328	0.0164617	4.67e-05	0.0101329
cg15995695	1	179334675	AXDND1	rs7538909:179362342:C:T	chr1	179362342	4.24328	0.0164617	4.67e-05	0.0101329
cg15995695	1	179334675	AXDND1	rs7515710:179362451:G:A	chr1	179362451	4.24328	0.0164617	4.67e-05	0.0101329
cg15995695	1	179334675	AXDND1	rs11803247:179361528:G:C	chr1	179361528	4.24328	0.0164617	4.67e-05	0.0101329
cg15995695	1	179334675	AXDND1	rs4233178:179359362:T:C	chr1	179359362	4.24328	0.0164617	4.67e-05	0.0101329
cg15995695	1	179334675	AXDND1	rs11803938:179358449:G:A	chr1	179358449	4.24328	0.0164617	4.67e-05	0.0101329
cg15995695	1	179334675	AXDND1	rs7553154:179362697:T:C	chr1	179362697	4.24328	0.0164617	4.67e-05	0.0101329
cg15995695	1	179334675	AXDND1	rs12729623:179356323:C:G	chr1	179356323	4.24328	0.0164617	4.67e-05	0.0101329
cg15995695	1	179334675	AXDND1	rs12751244:179360229:C:T	chr1	179360229	4.24328	0.0164617	4.67e-05	0.0101329
cg15995695	1	179334675	AXDND1	rs4652370:179359789:G:A	chr1	179359789	4.24328	0.0164617	4.67e-05	0.0101329
cg15995695	1	179334675	AXDND1	rs11804154:179361299:T:G	chr1	179361299	4.24328	0.0164617	4.67e-05	0.0101329
cg15995695	1	179334675	AXDND1	rs11807559:179358626:C:G	chr1	179358626	4.24328	0.0164617	4.67e-05	0.0101329
cg15995695	1	179334675	AXDND1	rs4233179:179359612:G:T	chr1	179359612	4.24328	0.0164617	4.67e-05	0.0101329
cg15995695	1	179334675	AXDND1	rs61821539:179360006:A:G	chr1	179360006	4.24328	0.0164617	4.67e-05	0.0101329
cg15995695	1	179334675	AXDND1	rs11803781:179361050:A:G	chr1	179361050	4.24328	0.0164617	4.67e-05	0.0101329
cg15995695	1	179334675	AXDND1	rs11805235:179361287:G:C	chr1	179361287	4.24328	0.0164617	4.67e-05	0.0101329
cg15995695	1	179334675	AXDND1	rs76216910:179360002:T:C	chr1	179360002	4.24328	0.0164617	4.67e-05	0.0101329
cg15995695	1	179334675	AXDND1	rs12731823:179359810:A:G	chr1	179359810	4.24328	0.0164617	4.67e-05	0.0101329
cg15995695	1	179334675	AXDND1	rs12724778:179344869:C:G	chr1	179344869	4.24301	0.0164636	4.68e-05	0.0101416
cg08715231	8	25906064	NA	rs7834679:25889267:C:T	chr8	25889267	4.24276	0.0121444	4.68e-05	0.010149
cg00603274	11	61596626	FADS2	rs174580:61606642:A:G	chr11	61606642	4.2427	0.00913743	4.68e-05	0.010151
cg03876032	10	26501065	MYO3A	rs7095559:26453168:G:A	chr10	26453168	-4.24241	-0.01793	4.69e-05	0.0101599
cg08715231	8	25906064	NA	rs7821832	chr8	25889446	4.24213	0.0121418	4.69e-05	0.0101687
cg06634716	1	217311151	ESRRG	rs830321:217302383:G:A	chr1	217302383	-4.24209	-0.0156008	4.69e-05	0.0101701
cg15995695	1	179334675	AXDND1	rs16854429:179609589:G:T	chr1	179609589	-4.23905	-0.0207528	4.75e-05	0.0102689
cg03876032	10	26501065	MYO3A	rs10828928:26292014:T:G	chr10	26292014	-4.23828	-0.0182658	4.76e-05	0.0102944
cg26726141	17	64612159	PRKCA	rs56011218:64510006:T:C	chr17	64510006	4.23745	0.0192705	4.78e-05	0.010322
cg15995695	1	179334675	AXDND1	rs201298419	chr1	179402037	-4.23455	-0.0158461	4.83e-05	0.0104172
cg00603274	11	61596626	FADS2	rs174574:61600342:A:C	chr11	61600342	-4.23069	-0.0089886	4.9e-05	0.0105445
cg26112929	7	5821500	RNF216	rs148921166:5819911:G:T	chr7	5819911	4.2237	0.00945143	5.03e-05	0.0107808
cg14377594	9	1051505	DMRT2	rs906771:1053497:G:C	chr9	1053497	-4.22092	-0.0190752	5.09e-05	0.0108762
cg00425710	16	56672671	MT1A	rs964372	chr16	56686030	4.21844	0.0265074	5.14e-05	0.0109603
cg00425710	16	56672671	MT1A	rs4619400:56686005:T:A	chr16	56686005	4.21844	0.0265074	5.14e-05	0.0109603
cg00425710	16	56672671	MT1A	rs2070838:56686002:G:C	chr16	56686002	4.21844	0.0265074	5.14e-05	0.0109603
cg08715231	8	25906064	NA	rs34726834:25889606:C:T	chr8	25889606	4.21752	0.0120936	5.15e-05	0.010992
cg03876032	10	26501065	MYO3A	rs1474216:26237380:C:T	chr10	26237380	-4.21537	-0.0178492	5.2e-05	0.0110653
cg00603274	11	61596626	FADS2	rs174578:61605499:T:A	chr11	61605499	4.21473	0.00907111	5.21e-05	0.0110878
cg15995695	1	179334675	AXDND1	rs12739607:179387841:C:T	chr1	179387841	4.20857	0.0162812	5.33e-05	0.0113058
cg15995695	1	179334675	AXDND1	rs12406695:179541486:C:G	chr1	179541486	-4.20376	-0.0208778	5.43e-05	0.0114781
cg15995695	1	179334675	AXDND1	rs61821461:179330800:T:C	chr1	179330800	-4.20315	-0.0160463	5.44e-05	0.0115001
cg15995695	1	179334675	AXDND1	rs7349152:179331001:A:G	chr1	179331001	-4.20315	-0.0160463	5.44e-05	0.0115001
cg15995695	1	179334675	AXDND1	rs6675699:179329947:C:T	chr1	179329947	-4.20315	-0.0160463	5.44e-05	0.0115001
cg15995695	1	179334675	AXDND1	rs12119196:179538631:A:G	chr1	179538631	-4.20163	-0.0208968	5.47e-05	0.0115544
cg15995695	1	179334675	AXDND1	rs36154977:179538506:T:C	chr1	179538506	-4.20143	-0.0208966	5.48e-05	0.0115617
cg15995695	1	179334675	AXDND1	rs77301802:179537714:T:C	chr1	179537714	-4.19986	-0.0208932	5.51e-05	0.0116202
cg00603274	11	61596626	FADS2	rs174576	chr11	61603510	4.19678	0.00902688	5.58e-05	0.0117336
cg00603274	11	61596626	FADS2	rs174577	chr11	61604814	4.19678	0.00902688	5.58e-05	0.0117336
cg00603274	11	61596626	FADS2	rs174541:61565908:T:C	chr11	61565908	4.19523	0.009078	5.61e-05	0.0117906
cg00603274	11	61596626	FADS2	rs4246215:61564299:G:T	chr11	61564299	4.19523	0.009078	5.61e-05	0.0117906
cg26112929	7	5821500	RNF216	rs860424:5676612:T:C	chr7	5676612	-4.1936	-0.0095966	5.64e-05	0.0118502
cg05700079	3	147126961	ZIC1	rs55654477:147291768:C:T	chr3	147291768	4.19309	0.0176884	5.65e-05	0.0118689
cg05700079	3	147126961	ZIC1	rs6440485:147282907:A:G	chr3	147282907	4.19309	0.0176884	5.65e-05	0.0118689
cg05700079	3	147126961	ZIC1	rs55715196:147293312:A:G	chr3	147293312	4.19309	0.0176884	5.65e-05	0.0118689
cg05700079	3	147126961	ZIC1	rs28612469:147281175:A:C	chr3	147281175	4.19309	0.0176884	5.65e-05	0.0118689
cg05700079	3	147126961	ZIC1	rs12636515:147280527:A:C	chr3	147280527	4.19309	0.0176884	5.65e-05	0.0118689
cg05700079	3	147126961	ZIC1	rs56051140:147292987:T:G	chr3	147292987	4.19309	0.0176884	5.65e-05	0.0118689
cg05700079	3	147126961	ZIC1	rs4542989:147279579:G:A	chr3	147279579	4.19309	0.0176884	5.65e-05	0.0118689
cg05700079	3	147126961	ZIC1	rs9878930	chr3	147276761	4.19309	0.0176884	5.65e-05	0.0118689
cg05700079	3	147126961	ZIC1	rs4347975:147278999:A:G	chr3	147278999	4.19309	0.0176884	5.65e-05	0.0118689
cg05700079	3	147126961	ZIC1	rs13316704:147280329:G:A	chr3	147280329	4.19309	0.0176884	5.65e-05	0.0118689
cg15995695	1	179334675	AXDND1	rs12145539:179534775:T:C	chr1	179534775	-4.19009	-0.0208478	5.72e-05	0.0119822
cg03876032	10	26501065	MYO3A	rs9665611:26193578:T:C	chr10	26193578	-4.18947	-0.0181963	5.73e-05	0.0120056
cg15995695	1	179334675	AXDND1	rs12746001:179349379:G:A	chr1	179349379	4.18924	0.0163771	5.74e-05	0.0120147
cg03876032	10	26501065	MYO3A	rs10764589:26191448:A:T	chr10	26191448	-4.18657	-0.0181985	5.8e-05	0.0121143
cg06634716	1	217311151	ESRRG	rs10863298:217289205:T:C	chr1	217289205	-4.1858	-0.0154151	5.81e-05	0.0121435
cg26112929	7	5821500	RNF216	rs852374:5676119:T:C	chr7	5676119	-4.18547	-0.0095855	5.82e-05	0.0121562
cg03876032	10	26501065	MYO3A	rs1851146:26302619:C:T	chr10	26302619	-4.18465	-0.0180213	5.84e-05	0.012187
cg04427498	7	20830657	NA	rs78709870:20857940:G:A	chr7	20857940	4.18321	0.0308998	5.87e-05	0.0122414
cg06634716	1	217311151	ESRRG	rs830312:217289922:G:C	chr1	217289922	-4.18235	-0.0154551	5.89e-05	0.0122735
cg03876032	10	26501065	MYO3A	rs2027356	chr10	26306317	-4.18127	-0.0180053	5.91e-05	0.0123149
cg03876032	10	26501065	MYO3A	rs7914935	chr10	26306812	-4.18127	-0.0180053	5.91e-05	0.0123149
cg06634716	1	217311151	ESRRG	rs4846815	chr1	217288723	4.18062	0.0153659	5.93e-05	0.0123403
cg26112929	7	5821500	RNF216	rs62455883:5818445:G:T	chr7	5818445	4.18038	0.00936081	5.93e-05	0.0123496
cg15995695	1	179334675	AXDND1	rs12740826:179531365:G:A	chr1	179531365	-4.17176	-0.0207342	6.13e-05	0.0126848
cg15995695	1	179334675	AXDND1	rs3754133:179513764:G:A	chr1	179513764	4.17104	0.0166927	6.15e-05	0.0127143
cg05467160	2	176945526	EVX2	rs10202307:176681487:A:G	chr2	176681487	4.16719	0.0160595	6.24e-05	0.0128669
cg26112929	7	5821500	RNF216	rs61405954:5761554:T:C	chr7	5761554	4.16703	0.0092937	6.24e-05	0.0128731
cg16386080	9	90589146	CDK20	rs2150630:90595231:C:A	chr9	90595231	4.1661	0.00957749	6.26e-05	0.0129097
cg16386080	9	90589146	CDK20	rs639569:90613394:T:G	chr9	90613394	4.16573	0.00957685	6.27e-05	0.0129248
cg16386080	9	90589146	CDK20	rs526909:90610625:C:G	chr9	90610625	4.16573	0.00957685	6.27e-05	0.0129248
cg15995695	1	179334675	AXDND1	rs4557923:179373627:A:G	chr1	179373627	4.16429	0.0161742	6.3e-05	0.0129832
cg26112929	7	5821500	RNF216	rs2537624:5681677:G:A	chr7	5681677	-4.16286	-0.0091096	6.34e-05	0.013041
cg14901671	17	70589079	NA	rs9912578:70578744:A:G	chr17	70578744	-4.16224	-0.0081433	6.35e-05	0.0130667
cg15995695	1	179334675	AXDND1	rs6661379	chr1	179420383	-4.1615	-0.0150047	6.37e-05	0.0130969
cg06634716	1	217311151	ESRRG	rs6604656	chr1	217342612	4.16048	0.0174581	6.4e-05	0.0131388
cg05467160	2	176945526	EVX2	rs1900330:176682899:C:T	chr2	176682899	4.15895	0.0160313	6.43e-05	0.0132012
cg05467160	2	176945526	EVX2	rs1031222:176679403:G:A	chr2	176679403	4.15895	0.0160313	6.43e-05	0.0132012
cg05467160	2	176945526	EVX2	rs1975542:176665272:A:G	chr2	176665272	4.15895	0.0160313	6.43e-05	0.0132012
cg05467160	2	176945526	EVX2	rs6741106:176675100:T:C	chr2	176675100	4.15895	0.0160313	6.43e-05	0.0132012
cg05467160	2	176945526	EVX2	rs10201284	chr2	176684549	4.15895	0.0160313	6.43e-05	0.0132012
cg10281977	14	105070864	TMEM179	rs11625416	chr14	104893652	-4.15588	-0.0222401	6.51e-05	0.0133271
cg00603274	11	61596626	FADS2	rs99780:61596633:C:T	chr11	61596633	4.15448	0.00900079	6.54e-05	0.0133838
cg00603274	11	61596626	FADS2	rs174566	chr11	61592362	4.15403	0.0089998	6.55e-05	0.0134024
cg22995692	5	141263164	NA	rs758465:141284567:G:A	chr5	141284567	4.15093	0.0158287	6.63e-05	0.0135308
cg13154880	4	48486472	SLC10A4	rs1507862	chr4	48533674	-4.14825	-0.0131921	6.7e-05	0.0136452
cg02225085	5	87975992	LINC00461	rs10080042:88205498:T:C	chr5	88205498	4.14784	0.016374	6.71e-05	0.0136618
cg15995695	1	179334675	AXDND1	rs4652420:179562143:G:A	chr1	179562143	-4.1453	-0.0147937	6.77e-05	0.0137681
cg14535884	9	117349621	ATP6V1G1	rs113388619:117358554:G:A	chr9	117358554	-4.14378	-0.0406136	6.81e-05	0.0138319
cg04809453	16	1030383	SOX8	rs7204824:969631:T:C	chr16	969631	-4.14187	-0.0270099	6.86e-05	0.0139143
cg14535884	9	117349621	ATP6V1G1	rs12352488:117361630:A:C	chr9	117361630	-4.14135	-0.0406384	6.87e-05	0.0139363
cg04809453	16	1030383	SOX8	rs11866545:969030:T:C	chr16	969030	-4.14057	-0.0270074	6.89e-05	0.0139697
cg26112929	7	5821500	RNF216	rs852417:5703669:A:G	chr7	5703669	-4.13992	-0.0092898	6.91e-05	0.0139979
cg14679587	12	56882324	GLS2	12:56845843:T:A	chr12	56845843	-4.13814	-0.0188237	6.96e-05	0.0140762
cg14679587	12	56882324	GLS2	rs774045	chr12	56838745	-4.13814	-0.0188237	6.96e-05	0.0140762
cg14679587	12	56882324	GLS2	rs1082214	chr12	56846490	-4.13814	-0.0188237	6.96e-05	0.0140762
cg14679587	12	56882324	GLS2	12:56837979:C:T	chr12	56837979	-4.13814	-0.0188237	6.96e-05	0.0140762
cg14679587	12	56882324	GLS2	12:56834983:T:A	chr12	56834983	-4.13814	-0.0188237	6.96e-05	0.0140762
cg16386080	9	90589146	CDK20	rs11794006:90599859:T:A	chr9	90599859	4.13517	0.00955473	7.04e-05	0.0142065
cg15995695	1	179334675	AXDND1	rs2274623	chr1	179520108	-4.1326	-0.0204607	7.1e-05	0.0143211
cg15995695	1	179334675	AXDND1	rs2274625	chr1	179520844	-4.1326	-0.0204607	7.1e-05	0.0143211
cg15995695	1	179334675	AXDND1	rs12740065:179527401:A:G	chr1	179527401	-4.1326	-0.0204607	7.1e-05	0.0143211
cg15995695	1	179334675	AXDND1	rs34816244:179523031:C:T	chr1	179523031	-4.13242	-0.020465	7.11e-05	0.0143285
cg15995695	1	179334675	AXDND1	rs6657893:179532148:G:A	chr1	179532148	4.1314	0.0194492	7.14e-05	0.0143741
cg06470822	6	28175283	NA	rs149855:27877985:A:G	chr6	27877985	-4.11339	-0.0130105	7.63e-05	0.0151786
cg15995695	1	179334675	AXDND1	rs71630231:179530017:A:G	chr1	179530017	4.11269	0.0193251	7.65e-05	0.0152105
cg05938001	2	172952948	DLX1	rs13014155:173035157:A:G	chr2	173035157	-4.1126	-0.0198427	7.66e-05	0.015215
cg15995695	1	179334675	AXDND1	rs58485713:179530014:G:C	chr1	179530014	4.1125	0.0193242	7.66e-05	0.0152199
cg02225085	5	87975992	LINC00461	rs34875688:88182026:T:A	chr5	88182026	4.11126	0.0164745	7.7e-05	0.0152781
cg00425710	16	56672671	MT1A	rs7198676:56684825:A:G	chr16	56684825	-4.1098	-0.0227124	7.74e-05	0.0153445
cg05938001	2	172952948	DLX1	rs13006876	chr2	173034038	-4.1095	-0.0198096	7.75e-05	0.0153581
cg06760077	2	119068497	NA	rs7599505:119192857:A:G	chr2	119192857	4.10852	0.049934	7.77e-05	0.0154038
cg26112929	7	5821500	RNF216	rs2112006:5786245:G:A	chr7	5786245	4.10708	0.00933399	7.82e-05	0.0154697
cg03876032	10	26501065	MYO3A	rs4495785:26173270:T:C	chr10	26173270	-4.10565	-0.0179345	7.86e-05	0.0155367
cg06634716	1	217311151	ESRRG	rs1166332	chr1	217287741	-4.10471	-0.0152683	7.89e-05	0.0155813
cg00425710	16	56672671	MT1A	rs4464073:56690038:C:T	chr16	56690038	-4.10463	-0.0226899	7.89e-05	0.0155851
cg00425710	16	56672671	MT1A	rs7197489	chr16	56683993	-4.10463	-0.0226899	7.89e-05	0.0155851
cg15715853	3	150916446	GPR171	rs78839801:151308081:G:A	chr3	151308081	-4.10372	-0.0356983	7.92e-05	0.015628
cg06470822	6	28175283	NA	rs9468278:28028482:C:T	chr6	28028482	-4.10083	-0.0130838	8e-05	0.015766
cg06470822	6	28175283	NA	rs9380046	chr6	28030499	-4.10083	-0.0130838	8e-05	0.015766
cg06470822	6	28175283	NA	rs9468275	chr6	28026136	-4.10083	-0.0130838	8e-05	0.015766
cg06470822	6	28175283	NA	rs4713133	chr6	28034041	-4.10083	-0.0130838	8e-05	0.015766
cg06470822	6	28175283	NA	rs9468272:28025768:G:A	chr6	28025768	-4.10083	-0.0130838	8e-05	0.015766
cg06470822	6	28175283	NA	rs9393881:28023751:C:G	chr6	28023751	-4.10083	-0.0130838	8e-05	0.015766
cg06470822	6	28175283	NA	rs175954	chr6	28011585	-4.10083	-0.0130838	8e-05	0.015766
cg06470822	6	28175283	NA	rs4713132	chr6	28034035	-4.10083	-0.0130838	8e-05	0.015766
cg06470822	6	28175283	NA	rs4713134	chr6	28034121	-4.10083	-0.0130838	8e-05	0.015766
cg06470822	6	28175283	NA	rs203889	chr6	28021775	-4.10083	-0.0130838	8e-05	0.015766
cg06470822	6	28175283	NA	rs172165:28020814:T:G	chr6	28020814	-4.10083	-0.0130838	8e-05	0.015766
cg06470822	6	28175283	NA	rs13218430:28029837:T:C	chr6	28029837	-4.10083	-0.0130838	8e-05	0.015766
cg06470822	6	28175283	NA	rs9348789	chr6	28025486	-4.10083	-0.0130838	8e-05	0.015766
cg06470822	6	28175283	NA	rs9468277	chr6	28028390	-4.10083	-0.0130838	8e-05	0.015766
cg06470822	6	28175283	NA	rs9468271	chr6	28024570	-4.10083	-0.0130838	8e-05	0.015766
cg06470822	6	28175283	NA	rs203888	chr6	28021589	-4.10083	-0.0130838	8e-05	0.015766
cg06470822	6	28175283	NA	rs149961	chr6	28015569	-4.10083	-0.0130838	8e-05	0.015766
cg06470822	6	28175283	NA	rs10484403	chr6	28033523	-4.10083	-0.0130838	8e-05	0.015766
cg06470822	6	28175283	NA	rs149900	chr6	28014597	-4.10083	-0.0130838	8e-05	0.015766
cg06470822	6	28175283	NA	rs9468274	chr6	28026077	-4.10083	-0.0130838	8e-05	0.015766
cg06470822	6	28175283	NA	rs201629255	chr6	28007409	4.10083	0.0130838	8e-05	0.015766
cg06470822	6	28175283	NA	rs9468276	chr6	28027688	-4.10083	-0.0130838	8e-05	0.015766
cg06470822	6	28175283	NA	rs172166	chr6	28020820	-4.10083	-0.0130838	8e-05	0.015766
cg06470822	6	28175283	NA	rs149899	chr6	28019979	-4.10083	-0.0130838	8e-05	0.015766
cg06470822	6	28175283	NA	rs9295756	chr6	28033396	-4.10083	-0.0130838	8e-05	0.015766
cg06470822	6	28175283	NA	rs9380045	chr6	28025279	-4.10083	-0.0130838	8e-05	0.015766
cg06470822	6	28175283	NA	rs9295755	chr6	28033174	-4.10083	-0.0130838	8e-05	0.015766
cg06470822	6	28175283	NA	rs203887	chr6	28021269	-4.10083	-0.0130838	8e-05	0.015766
cg06470822	6	28175283	NA	rs66529373:28023008:T:A	chr6	28023008	-4.10083	-0.0130838	8e-05	0.015766
cg06470822	6	28175283	NA	rs149964:28018469:A:G	chr6	28018469	-4.10083	-0.0130838	8e-05	0.015766
cg06470822	6	28175283	NA	rs9357060	chr6	28024486	-4.10083	-0.0130838	8e-05	0.015766
cg06470822	6	28175283	NA	rs203890	chr6	28022248	-4.10083	-0.0130838	8e-05	0.015766
cg05700079	3	147126961	ZIC1	rs7651055	chr3	147345411	4.09928	0.0174299	8.05e-05	0.0158405
cg11730703	14	105167607	INF2	rs10150295:105188049:C:T	chr14	105188049	4.09867	0.00738033	8.07e-05	0.0158698
cg16386080	9	90589146	CDK20	rs666459:90589016:A:G	chr9	90589016	4.09794	0.0094017	8.09e-05	0.0159048
cg26112929	7	5821500	RNF216	rs10951960	chr7	5785725	4.0972	0.00930741	8.11e-05	0.0159412
cg06470822	6	28175283	NA	rs9368548:28034737:A:G	chr6	28034737	-4.09702	-0.0130755	8.12e-05	0.0159498
cg02225085	5	87975992	LINC00461	rs10038371:88199223:C:T	chr5	88199223	4.09694	0.015934	8.12e-05	0.0159537
cg05725804	5	114516219	TRIM36	rs1453027	chr5	114324954	4.09661	0.0100284	8.13e-05	0.0159704
cg02225085	5	87975992	LINC00461	rs10066711:88190604:A:T	chr5	88190604	4.09498	0.0159191	8.18e-05	0.0160506
cg11730703	14	105167607	INF2	rs4247031:105181851:C:T	chr14	105181851	4.0931	0.00731995	8.24e-05	0.0161442
cg05725804	5	114516219	TRIM36	rs28424064:114289035:A:C	chr5	114289035	4.09097	0.0101366	8.3e-05	0.0162462
cg13645908	17	714733	NXN	rs62070002:713235:T:C	chr17	713235	-4.09048	-0.0073919	8.32e-05	0.0162713
cg11730703	14	105167607	INF2	rs61998907:105187469:G:A	chr14	105187469	4.09021	0.00733789	8.32e-05	0.0162846
cg03876032	10	26501065	MYO3A	rs11014863	chr10	26221227	-4.0896	-0.0172651	8.34e-05	0.0163143
cg03876032	10	26501065	MYO3A	rs10828913:26216468:G:A	chr10	26216468	-4.0896	-0.0172651	8.34e-05	0.0163143
cg26112929	7	5821500	RNF216	rs6963602:5816221:G:A	chr7	5816221	4.08945	0.00929591	8.35e-05	0.0163217
cg15715853	3	150916446	GPR171	rs1597168:151302184:G:T	chr3	151302184	-4.08914	-0.0355696	8.36e-05	0.0163359
cg00603274	11	61596626	FADS2	rs174605:61626921:G:T	chr11	61626921	4.08903	0.00924315	8.36e-05	0.0163412
cg16386080	9	90589146	CDK20	rs7864206:90630018:T:C	chr9	90630018	-4.0886	-0.0097549	8.38e-05	0.0163624
cg16386080	9	90589146	CDK20	rs7849452:90630444:G:C	chr9	90630444	-4.08477	-0.0097392	8.5e-05	0.0165543
cg16386080	9	90589146	CDK20	rs7864469	chr9	90630239	-4.08477	-0.0097392	8.5e-05	0.0165543
cg05725804	5	114516219	TRIM36	rs1453011:114293775:A:G	chr5	114293775	4.08453	0.0101322	8.5e-05	0.0165664
cg06306198	3	147128998	ZIC1	rs924762:147223899:C:T	chr3	147223899	4.08428	0.0131136	8.51e-05	0.016579
cg06470822	6	28175283	NA	rs12174026:28023300:C:A	chr6	28023300	-4.08302	-0.0130235	8.55e-05	0.0166415
cg11730703	14	105167607	INF2	rs34055148:105184088:G:C	chr14	105184088	4.08214	0.00725191	8.58e-05	0.0166858
cg15995695	1	179334675	AXDND1	rs10913817	chr1	179529150	4.08184	0.019112	8.59e-05	0.0167013
cg05725804	5	114516219	TRIM36	rs10041253:114300718:T:A	chr5	114300718	4.08117	0.0101272	8.61e-05	0.0167342
cg26112929	7	5821500	RNF216	rs56062921:5815989:C:T	chr7	5815989	4.08097	0.0092762	8.62e-05	0.0167447
cg06470822	6	28175283	NA	rs9380067:28150998:G:A	chr6	28150998	-4.07987	-0.0128144	8.65e-05	0.0168016
cg18400845	11	31837960	PAX6	rs72908271	chr11	32277411	-4.0769	-0.0128062	8.75e-05	0.0169537
cg06470822	6	28175283	NA	rs1150689	chr6	28165099	-4.07613	-0.0128066	8.77e-05	0.0169941
cg06470822	6	28175283	NA	rs1233705	chr6	28166447	-4.07613	-0.0128066	8.77e-05	0.0169941
cg06470822	6	28175283	NA	rs1225599	chr6	28165190	-4.07613	-0.0128066	8.77e-05	0.0169941
cg06470822	6	28175283	NA	rs9295762	chr6	28155418	-4.07613	-0.0128066	8.77e-05	0.0169941
cg06470822	6	28175283	NA	rs35576511:28074925:C:A	chr6	28074925	-4.07613	-0.0128066	8.77e-05	0.0169941
cg06470822	6	28175283	NA	rs1233701:28168726:C:G	chr6	28168726	-4.07613	-0.0128066	8.77e-05	0.0169941
cg06470822	6	28175283	NA	rs1233699	chr6	28169158	-4.07613	-0.0128066	8.77e-05	0.0169941
cg06470822	6	28175283	NA	rs1150692:28173957:A:G	chr6	28173957	-4.07613	-0.0128066	8.77e-05	0.0169941
cg06470822	6	28175283	NA	rs1150693	chr6	28174590	-4.07613	-0.0128066	8.77e-05	0.0169941
cg06470822	6	28175283	NA	rs1225598	chr6	28160799	-4.07613	-0.0128066	8.77e-05	0.0169941
cg06470822	6	28175283	NA	rs1233707	chr6	28172953	-4.07613	-0.0128066	8.77e-05	0.0169941
cg06470822	6	28175283	NA	rs6901017	chr6	28152583	-4.07613	-0.0128066	8.77e-05	0.0169941
cg06470822	6	28175283	NA	rs1237875	chr6	28173010	-4.07613	-0.0128066	8.77e-05	0.0169941
cg06470822	6	28175283	NA	rs1233697:28172263:G:A	chr6	28172263	-4.07613	-0.0128066	8.77e-05	0.0169941
cg06470822	6	28175283	NA	rs1233704	chr6	28166923	-4.07613	-0.0128066	8.77e-05	0.0169941
cg13154880	4	48486472	SLC10A4	rs7697851:48483930:T:C	chr4	48483930	-4.06966	-0.0124701	8.99e-05	0.0173306
cg06470822	6	28175283	NA	rs1225596:28162620:T:C	chr6	28162620	-4.06763	-0.0127786	9.06e-05	0.0174361
cg11730703	14	105167607	INF2	rs1128880:105185666:G:T	chr14	105185666	4.06331	0.00722685	9.2e-05	0.0176646
cg11730703	14	105167607	INF2	rs10146459	chr14	105186333	4.06331	0.00722685	9.2e-05	0.0176646
cg04427498	7	20830657	NA	rs111671356:20864259:G:A	chr7	20864259	4.0627	0.029346	9.22e-05	0.0176968
cg15715853	3	150916446	GPR171	rs77175533:151176886:C:A	chr3	151176886	-4.06207	-0.0448124	9.24e-05	0.0177309
cg05725804	5	114516219	TRIM36	rs13182444:114314045:C:T	chr5	114314045	-4.06191	-0.0100936	9.25e-05	0.0177393
cg05725804	5	114516219	TRIM36	rs1901740:114306830:T:C	chr5	114306830	4.06191	0.0100936	9.25e-05	0.0177393
cg05725804	5	114516219	TRIM36	rs7443273	chr5	114305091	-4.06191	-0.0100936	9.25e-05	0.0177393
cg05725804	5	114516219	TRIM36	rs7701456	chr5	114323981	-4.06191	-0.0100936	9.25e-05	0.0177393
cg08715231	8	25906064	NA	rs4872393	chr8	25917711	4.05628	0.0119351	9.44e-05	0.0180439
cg03876032	10	26501065	MYO3A	rs35769796	chr10	26303714	-4.05567	-0.0174239	9.47e-05	0.018076
cg08715231	8	25906064	NA	rs7826952:25890549:T:C	chr8	25890549	4.05561	0.0117331	9.47e-05	0.0180797
cg05725804	5	114516219	TRIM36	rs1453025	chr5	114317546	4.05455	0.0100189	9.51e-05	0.0181356
cg05467160	2	176945526	EVX2	rs6741712:176675585:T:C	chr2	176675585	4.0533	0.0158099	9.55e-05	0.0182038
cg13154880	4	48486472	SLC10A4	rs6447651:48709424:C:T	chr4	48709424	-4.05323	-0.0128918	9.55e-05	0.0182082
cg13154880	4	48486472	SLC10A4	rs7682859:48704731:T:G	chr4	48704731	-4.05323	-0.0128918	9.55e-05	0.0182082
cg13154880	4	48486472	SLC10A4	rs146739504:48715605:G:C	chr4	48715605	-4.05323	-0.0128918	9.55e-05	0.0182082
cg13154880	4	48486472	SLC10A4	rs142494662:48715421:C:A	chr4	48715421	-4.05323	-0.0128918	9.55e-05	0.0182082
cg13154880	4	48486472	SLC10A4	rs10011896:48716818:C:T	chr4	48716818	-4.05323	-0.0128918	9.55e-05	0.0182082
cg13154880	4	48486472	SLC10A4	rs13138269:48565101:A:T	chr4	48565101	-4.05295	-0.0128919	9.56e-05	0.0182235
cg13154880	4	48486472	SLC10A4	rs7689524	chr4	48562628	-4.05206	-0.0128879	9.59e-05	0.0182716
cg13154880	4	48486472	SLC10A4	rs2089503:48596487:G:A	chr4	48596487	-4.05206	-0.0128879	9.59e-05	0.0182716
cg13154880	4	48486472	SLC10A4	rs17472365:48596973:G:C	chr4	48596973	-4.05206	-0.0128879	9.59e-05	0.0182716
cg13154880	4	48486472	SLC10A4	rs6447647:48590870:T:C	chr4	48590870	-4.05206	-0.0128879	9.59e-05	0.0182716
cg13154880	4	48486472	SLC10A4	rs7683398	chr4	48546153	-4.05206	-0.0128879	9.59e-05	0.0182716
cg13154880	4	48486472	SLC10A4	rs2354348:48611149:A:G	chr4	48611149	-4.05206	-0.0128879	9.59e-05	0.0182716
cg13154880	4	48486472	SLC10A4	rs6819159:48528103:G:A	chr4	48528103	-4.05206	-0.0128879	9.59e-05	0.0182716
cg13154880	4	48486472	SLC10A4	rs6447645:48571364:C:T	chr4	48571364	-4.05206	-0.0128879	9.59e-05	0.0182716
cg13154880	4	48486472	SLC10A4	rs17575720:48572205:C:T	chr4	48572205	-4.05206	-0.0128879	9.59e-05	0.0182716
cg13154880	4	48486472	SLC10A4	rs13127730:48590606:C:T	chr4	48590606	-4.05206	-0.0128879	9.59e-05	0.0182716
cg13154880	4	48486472	SLC10A4	rs7660206:48765787:C:T	chr4	48765787	-4.05206	-0.0128879	9.59e-05	0.0182716
cg13154880	4	48486472	SLC10A4	rs11933919:48600773:G:C	chr4	48600773	-4.05206	-0.0128879	9.59e-05	0.0182716
cg13154880	4	48486472	SLC10A4	rs7693461	chr4	48568259	-4.05206	-0.0128879	9.59e-05	0.0182716
cg13154880	4	48486472	SLC10A4	rs7679210:48576664:A:T	chr4	48576664	-4.05206	-0.0128879	9.59e-05	0.0182716
cg13154880	4	48486472	SLC10A4	rs10030853:48598393:T:C	chr4	48598393	-4.05206	-0.0128879	9.59e-05	0.0182716
cg13154880	4	48486472	SLC10A4	rs10029732	chr4	48498679	-4.05206	-0.0128879	9.59e-05	0.0182716
cg13154880	4	48486472	SLC10A4	rs1517674	chr4	48778975	4.05206	0.0128879	9.59e-05	0.0182716
cg13154880	4	48486472	SLC10A4	rs34558821	chr4	48588742	-4.05206	-0.0128879	9.59e-05	0.0182716
cg13154880	4	48486472	SLC10A4	rs952289	chr4	48547041	-4.05206	-0.0128879	9.59e-05	0.0182716
cg13154880	4	48486472	SLC10A4	rs1589107:48762674:A:T	chr4	48762674	-4.05206	-0.0128879	9.59e-05	0.0182716
cg13154880	4	48486472	SLC10A4	rs10938534	chr4	48526639	-4.05206	-0.0128879	9.59e-05	0.0182716
cg13154880	4	48486472	SLC10A4	rs6856448:48599491:T:C	chr4	48599491	-4.05206	-0.0128879	9.59e-05	0.0182716
cg13154880	4	48486472	SLC10A4	rs28470767:48609931:T:C	chr4	48609931	-4.05206	-0.0128879	9.59e-05	0.0182716
cg13154880	4	48486472	SLC10A4	rs11734019:48585325:C:T	chr4	48585325	-4.05206	-0.0128879	9.59e-05	0.0182716
cg13154880	4	48486472	SLC10A4	rs1554256	chr4	48764009	-4.05206	-0.0128879	9.59e-05	0.0182716
cg13154880	4	48486472	SLC10A4	rs13108474:48618432:T:C	chr4	48618432	-4.05206	-0.0128879	9.59e-05	0.0182716
cg13154880	4	48486472	SLC10A4	rs10031777	chr4	48498290	-4.05206	-0.0128879	9.59e-05	0.0182716
cg13154880	4	48486472	SLC10A4	rs2056201:48776829:C:T	chr4	48776829	4.05206	0.0128879	9.59e-05	0.0182716
cg13154880	4	48486472	SLC10A4	rs1876469	chr4	48627192	-4.05206	-0.0128879	9.59e-05	0.0182716
cg13154880	4	48486472	SLC10A4	rs10003273:48756537:G:C	chr4	48756537	-4.05206	-0.0128879	9.59e-05	0.0182716
cg13154880	4	48486472	SLC10A4	rs7661515	chr4	48517352	-4.05206	-0.0128879	9.59e-05	0.0182716
cg13154880	4	48486472	SLC10A4	rs13151534:48616989:G:A	chr4	48616989	-4.05206	-0.0128879	9.59e-05	0.0182716
cg13154880	4	48486472	SLC10A4	rs10018344:48498670:C:G	chr4	48498670	-4.05199	-0.0128887	9.6e-05	0.0182753
cg13154880	4	48486472	SLC10A4	rs6814811:48740596:C:T	chr4	48740596	-4.05193	-0.0128874	9.6e-05	0.0182788
cg13154880	4	48486472	SLC10A4	rs12508608:48737076:G:A	chr4	48737076	4.05193	0.0128874	9.6e-05	0.0182788
cg13154880	4	48486472	SLC10A4	rs1554258:48749117:T:C	chr4	48749117	-4.05193	-0.0128874	9.6e-05	0.0182788
cg13154880	4	48486472	SLC10A4	rs10008265:48745442:C:T	chr4	48745442	-4.05193	-0.0128874	9.6e-05	0.0182788
cg13154880	4	48486472	SLC10A4	rs7670939:48703516:A:G	chr4	48703516	-4.05192	-0.0129832	9.6e-05	0.0182795
cg13154880	4	48486472	SLC10A4	rs10024404:48781535:T:G	chr4	48781535	-4.05181	-0.0128872	9.6e-05	0.018286
cg13154880	4	48486472	SLC10A4	rs6819193:48673683:T:G	chr4	48673683	-4.0518	-0.0128869	9.6e-05	0.0182861
cg13154880	4	48486472	SLC10A4	rs13119504:48684999:G:T	chr4	48684999	-4.0518	-0.0128869	9.6e-05	0.0182861
cg13154880	4	48486472	SLC10A4	rs10049761:48686957:G:T	chr4	48686957	-4.0518	-0.0128869	9.6e-05	0.0182861
cg13154880	4	48486472	SLC10A4	rs2354312:48670748:G:A	chr4	48670748	-4.0518	-0.0128869	9.6e-05	0.0182861
cg13154880	4	48486472	SLC10A4	rs13119041:48645230:A:C	chr4	48645230	-4.0518	-0.0128869	9.6e-05	0.0182861
cg13154880	4	48486472	SLC10A4	rs7667288:48659393:G:A	chr4	48659393	-4.0518	-0.0128869	9.6e-05	0.0182861
cg13154880	4	48486472	SLC10A4	rs6818954:48673540:T:C	chr4	48673540	-4.0518	-0.0128869	9.6e-05	0.0182861
cg13154880	4	48486472	SLC10A4	rs11737677:48654307:T:G	chr4	48654307	-4.0518	-0.0128869	9.6e-05	0.0182861
cg13154880	4	48486472	SLC10A4	rs11728565:48641133:T:A	chr4	48641133	-4.0518	-0.0128869	9.6e-05	0.0182861
cg13154880	4	48486472	SLC10A4	rs13108799:48665612:G:A	chr4	48665612	-4.05155	-0.0128863	9.61e-05	0.018299
cg13154880	4	48486472	SLC10A4	rs2292231:48505177:A:T	chr4	48505177	-4.05154	-0.0128885	9.61e-05	0.0182997
cg13154880	4	48486472	SLC10A4	rs2102397:48656326:A:C	chr4	48656326	4.05134	0.012886	9.62e-05	0.0183107
cg13154880	4	48486472	SLC10A4	rs10010571:48781536:C:G	chr4	48781536	-4.05087	-0.0128883	9.64e-05	0.018336
cg14305560	9	139487958	NA	rs28610213:139239807:G:A	chr9	139239807	4.05057	0.0126761	9.65e-05	0.0183522
cg13154880	4	48486472	SLC10A4	rs13113370:48706182:G:A	chr4	48706182	-4.0483	-0.0128875	9.73e-05	0.0184768
cg00252781	1	179334658	AXDND1	rs4330884:179373498:A:C	chr1	179373498	4.04649	0.0171328	9.79e-05	0.0185794
cg26726141	17	64612159	PRKCA	rs7220480:64686679:A:G	chr17	64686679	4.04508	0.0150536	9.85e-05	0.0186583
cg05725804	5	114516219	TRIM36	rs10039781:114325327:A:G	chr5	114325327	4.04191	0.0100518	9.96e-05	0.018838
cg08715231	8	25906064	NA	rs12544694:25898316:C:T	chr8	25898316	4.03985	0.011851	0.00010038	0.0189557
cg13696752	9	4662858	SPATA6L	rs12006031:4672381:T:C	chr9	4672381	4.03981	0.0153429	0.00010039	0.0189582
cg00603274	11	61596626	FADS2	rs97384:61624181:T:C	chr11	61624181	-4.03757	-0.0089938	0.00010123	0.0190854
cg11730703	14	105167607	INF2	rs2494735:105242966:T:C	chr14	105242966	-4.03617	-0.0083535	0.00010176	0.0191646
cg05938001	2	172952948	DLX1	rs13006420:173033787:C:T	chr2	173033787	-4.03542	-0.0195463	0.00010204	0.0192083
cg05725804	5	114516219	TRIM36	rs1901739:114286707:T:G	chr5	114286707	4.03003	0.00984152	0.00010409	0.0195202
cg26112929	7	5821500	RNF216	rs10277535:5811645:A:T	chr7	5811645	4.02732	0.00915554	0.00010514	0.0196792
cg26112929	7	5821500	RNF216	rs6967635	chr7	5813933	4.02635	0.0091466	0.00010552	0.0197357
cg26112929	7	5821500	RNF216	rs6944358	chr7	5814178	4.02635	0.0091466	0.00010552	0.0197357
cg02225085	5	87975992	LINC00461	rs188581:88175251:C:G	chr5	88175251	4.02585	0.0153297	0.00010571	0.0197652
cg15995695	1	179334675	AXDND1	rs7349140:179582935:G:C	chr1	179582935	-4.02519	-0.0188576	0.00010597	0.0198039
cg00603274	11	61596626	FADS2	rs174529	chr11	61543961	4.025	0.00860362	0.00010604	0.0198154
cg06634716	1	217311151	ESRRG	rs72743323	chr1	217290385	4.02387	0.0147863	0.00010649	0.0198832
cg00603274	11	61596626	FADS2	rs174530:61546592:A:G	chr11	61546592	4.02248	0.00860666	0.00010704	0.0199675
cg22995692	5	141263164	NA	rs758463:141297059:C:G	chr5	141297059	4.02032	0.0138732	0.00010789	0.0200971
cg22995692	5	141263164	NA	rs758464:141296898:T:G	chr5	141296898	4.0203	0.0138774	0.0001079	0.0200989
cg22995692	5	141263164	NA	rs758462:141297178:C:A	chr5	141297178	4.02019	0.0138692	0.00010794	0.0201054
cg16969368	17	57642752	DHX40	rs150539653:57848598:A:G	chr17	57848598	4.02015	0.0329338	0.00010796	0.0201074
cg22995692	5	141263164	NA	rs1428000:141297385:G:A	chr5	141297385	4.01963	0.0138602	0.00010817	0.0201387
cg13154880	4	48486472	SLC10A4	rs10938537:48643648:C:G	chr4	48643648	-4.01922	-0.0129453	0.00010833	0.0201637
cg22995692	5	141263164	NA	rs4912786:141295878:A:G	chr5	141295878	4.01919	0.0138814	0.00010834	0.0201653
cg22995692	5	141263164	NA	rs6580205	chr5	141294691	4.01919	0.0138814	0.00010834	0.0201653
cg22995692	5	141263164	NA	rs4141206	chr5	141296502	4.01919	0.0138814	0.00010834	0.0201653
cg07758738	18	12911528	NA	rs9916926	chr18	12918318	-4.01845	-0.0209562	0.00010864	0.0202106
cg22995692	5	141263164	NA	rs4391199:141297802:G:C	chr5	141297802	4.01697	0.013832	0.00010923	0.0202998
cg03876032	10	26501065	MYO3A	rs36024300:26303585:G:T	chr10	26303585	-4.01575	-0.0169626	0.00010973	0.020375
cg03876032	10	26501065	MYO3A	rs7911700:26286367:G:A	chr10	26286367	-4.01501	-0.0169522	0.00011003	0.0204197
cg03876032	10	26501065	MYO3A	rs7476863:26298277:C:T	chr10	26298277	-4.01457	-0.0169512	0.0001102	0.0204467
cg03876032	10	26501065	MYO3A	rs4626968:26261510:C:T	chr10	26261510	-4.01441	-0.0169465	0.00011027	0.0204564
cg03876032	10	26501065	MYO3A	rs12252546	chr10	26243603	-4.01426	-0.0169451	0.00011033	0.0204657
cg03876032	10	26501065	MYO3A	rs12247318:26243710:A:C	chr10	26243710	-4.01426	-0.0169451	0.00011033	0.0204657
cg05725804	5	114516219	TRIM36	rs60836954:114314086:G:A	chr5	114314086	-4.01397	-0.0121012	0.00011045	0.0204807
cg06470822	6	28175283	NA	rs156736:28004059:T:C	chr6	28004059	-4.01375	-0.013133	0.00011054	0.0204941
cg03876032	10	26501065	MYO3A	rs11014901:26294631:T:C	chr10	26294631	-4.01354	-0.0169476	0.00011063	0.0205068
cg15995695	1	179334675	AXDND1	rs142890316:179656605:A:G	chr1	179656605	-4.01282	-0.0182105	0.00011092	0.0205512
cg15995695	1	179334675	AXDND1	rs143194772:179656308:G:A	chr1	179656308	-4.01282	-0.0182105	0.00011092	0.0205512
cg15995695	1	179334675	AXDND1	rs4610966	chr1	179598179	-4.01258	-0.0182094	0.00011101	0.0205654
cg15995695	1	179334675	AXDND1	rs35061972:179599327:T:C	chr1	179599327	-4.01258	-0.0182094	0.00011101	0.0205654
cg15995695	1	179334675	AXDND1	rs61826407:179597238:G:C	chr1	179597238	-4.01258	-0.0182094	0.00011101	0.0205654
cg15995695	1	179334675	AXDND1	rs12139382	chr1	179659325	-4.01258	-0.0182094	0.00011101	0.0205654
cg15995695	1	179334675	AXDND1	rs7520524	chr1	179587050	-4.01258	-0.0182094	0.00011101	0.0205654
cg15995695	1	179334675	AXDND1	rs10798703:179601749:T:C	chr1	179601749	-4.01258	-0.0182094	0.00011101	0.0205654
cg15995695	1	179334675	AXDND1	rs12138352:179658598:A:G	chr1	179658598	-4.01258	-0.0182094	0.00011101	0.0205654
cg15995695	1	179334675	AXDND1	rs12140459:179595357:T:G	chr1	179595357	-4.01258	-0.0182094	0.00011101	0.0205654
cg15995695	1	179334675	AXDND1	rs12730397:179616882:C:T	chr1	179616882	-4.01258	-0.0182094	0.00011101	0.0205654
cg03876032	10	26501065	MYO3A	rs12775972:26294200:C:T	chr10	26294200	-4.01243	-0.0169427	0.00011108	0.0205751
cg06470822	6	28175283	NA	rs469227:27970705:A:C	chr6	27970705	-4.01224	-0.01313	0.00011115	0.0205861
cg06470822	6	28175283	NA	rs464312:27967591:T:A	chr6	27967591	-4.01224	-0.01313	0.00011115	0.0205861
cg06470822	6	28175283	NA	rs149946	chr6	27970031	-4.01224	-0.01313	0.00011115	0.0205861
cg06470822	6	28175283	NA	rs149901	chr6	27965503	-4.01224	-0.01313	0.00011115	0.0205861
cg06470822	6	28175283	NA	rs156744	chr6	27967274	-4.01224	-0.01313	0.00011115	0.0205861
cg06470822	6	28175283	NA	rs469228:27970704:A:G	chr6	27970704	-4.01224	-0.01313	0.00011115	0.0205861
cg06470822	6	28175283	NA	rs149984:27993335:T:C	chr6	27993335	-4.01224	-0.01313	0.00011115	0.0205861
cg06470822	6	28175283	NA	rs149979:27991007:G:A	chr6	27991007	-4.01224	-0.01313	0.00011115	0.0205861
cg06470822	6	28175283	NA	rs149983:27993247:G:A	chr6	27993247	-4.01224	-0.01313	0.00011115	0.0205861
cg06470822	6	28175283	NA	rs149969	chr6	27977737	-4.01224	-0.01313	0.00011115	0.0205861
cg06470822	6	28175283	NA	rs149968:27977495:T:C	chr6	27977495	-4.01224	-0.01313	0.00011115	0.0205861
cg06470822	6	28175283	NA	rs149948:27974817:C:G	chr6	27974817	-4.01224	-0.01313	0.00011115	0.0205861
cg06470822	6	28175283	NA	rs149970:27980220:G:A	chr6	27980220	-4.01224	-0.01313	0.00011115	0.0205861
cg06470822	6	28175283	NA	rs149947:27972433:A:T	chr6	27972433	-4.01224	-0.01313	0.00011115	0.0205861
cg00603274	11	61596626	FADS2	rs102275	chr11	61557803	4.01172	0.00858826	0.00011137	0.0206174
cg15995695	1	179334675	AXDND1	rs1410584:179581434:C:T	chr1	179581434	-4.01131	-0.0188831	0.00011154	0.0206431
cg03876032	10	26501065	MYO3A	rs74378589:26282451:C:G	chr10	26282451	-4.01086	-0.0169365	0.00011172	0.0206701
cg06470822	6	28175283	NA	rs9368527:27679445:C:A	chr6	27679445	-4.00895	-0.0102863	0.00011251	0.0207887
cg13696752	9	4662858	SPATA6L	rs12685244:4672878:C:T	chr9	4672878	4.0074	0.0154821	0.00011315	0.0208861
cg03876032	10	26501065	MYO3A	rs4749083	chr10	26196544	-4.00573	-0.0172166	0.00011385	0.0209817
cg03876032	10	26501065	MYO3A	rs11014851:26201259:G:T	chr10	26201259	-4.00573	-0.0172166	0.00011385	0.0209817
cg03876032	10	26501065	MYO3A	rs10764593:26208850:G:A	chr10	26208850	-4.00573	-0.0172166	0.00011385	0.0209817
cg03876032	10	26501065	MYO3A	rs12570917	chr10	26202032	-4.00573	-0.0172166	0.00011385	0.0209817
cg03876032	10	26501065	MYO3A	rs11014853:26207558:T:A	chr10	26207558	-4.00573	-0.0172166	0.00011385	0.0209817
cg03876032	10	26501065	MYO3A	rs10828909	chr10	26206856	-4.00573	-0.0172166	0.00011385	0.0209817
cg15995695	1	179334675	AXDND1	rs12407792:179582936:G:A	chr1	179582936	-4.00509	-0.0199707	0.00011412	0.0210212
cg23779890	8	75262522	GDAP1	rs7460641:75454496:T:C	chr8	75454496	4.004	0.0134535	0.00011458	0.0210905
cg03876032	10	26501065	MYO3A	rs9299814:26193948:C:T	chr10	26193948	-4.00386	-0.0172164	0.00011464	0.0210987
cg23598080	1	180204499	LHX4	rs355622	chr1	180194498	4.00294	0.00992891	0.00011503	0.0211571
cg00603274	11	61596626	FADS2	rs174608:61627484:A:G	chr11	61627484	4.00281	0.00877568	0.00011508	0.0211655
cg00603274	11	61596626	FADS2	rs174611	chr11	61627881	4.00262	0.00873609	0.00011516	0.0211777
cg15995695	1	179334675	AXDND1	rs10913833:179578129:G:T	chr1	179578129	-3.99895	-0.0198669	0.00011673	0.021409
cg15995695	1	179334675	AXDND1	rs1328594:179580152:T:C	chr1	179580152	-3.99784	-0.0188771	0.0001172	0.0214807
cg06470822	6	28175283	NA	rs9468209	chr6	27694421	-3.99748	-0.0104133	0.00011736	0.0215036
cg15995695	1	179334675	AXDND1	rs4504853:179576430:A:G	chr1	179576430	-3.99642	-0.0198162	0.00011782	0.0215716
cg03876032	10	26501065	MYO3A	rs10741103:26199218:T:A	chr10	26199218	-3.99555	-0.0171944	0.00011819	0.0216274
cg15995695	1	179334675	AXDND1	rs6700449:179625913:G:A	chr1	179625913	3.99504	0.0162649	0.00011842	0.0216599
cg15995695	1	179334675	AXDND1	rs35777003:179557130:T:A	chr1	179557130	-3.99488	-0.0198239	0.00011849	0.0216706
cg15995695	1	179334675	AXDND1	rs35229401:179662877:C:T	chr1	179662877	3.99431	0.0162599	0.00011874	0.0217069
cg16969368	17	57642752	DHX40	rs187256260:57577857:C:T	chr17	57577857	3.99362	0.0345758	0.00011904	0.021752
cg15995695	1	179334675	AXDND1	rs200309087	chr1	179559969	3.99345	0.0197838	0.00011911	0.0217628
cg05467160	2	176945526	EVX2	rs1446824	chr2	176643561	3.99304	0.014665	0.00011929	0.0217897
cg05467160	2	176945526	EVX2	rs12470969	chr2	176639561	3.99304	0.014665	0.00011929	0.0217897
cg05467160	2	176945526	EVX2	rs1348845:176639926:T:C	chr2	176639926	3.99304	0.014665	0.00011929	0.0217897
cg09477019	16	56681945	NA	rs1561141:56869430:T:C	chr16	56869430	-3.99274	-0.0281144	0.00011942	0.0218095
cg15995695	1	179334675	AXDND1	rs4652430:179612947:G:A	chr1	179612947	3.99252	0.016258	0.00011952	0.0218236
cg15995695	1	179334675	AXDND1	rs7534216:179627385:T:G	chr1	179627385	-3.99252	-0.016258	0.00011952	0.0218236
cg15995695	1	179334675	AXDND1	rs12751914:179620637:C:T	chr1	179620637	3.99252	0.016258	0.00011952	0.0218236
cg15995695	1	179334675	AXDND1	rs10157699:179606774:G:C	chr1	179606774	-3.99252	-0.016258	0.00011952	0.0218236
cg15995695	1	179334675	AXDND1	rs4628468	chr1	179604864	-3.99252	-0.016258	0.00011952	0.0218236
cg15995695	1	179334675	AXDND1	rs35448215	chr1	179631242	3.99252	0.016258	0.00011952	0.0218236
cg15995695	1	179334675	AXDND1	rs12747675:179604367:A:G	chr1	179604367	3.9925	0.0162583	0.00011953	0.0218247
cg03876032	10	26501065	MYO3A	rs4749089:26297871:G:A	chr10	26297871	-3.99129	-0.0173206	0.00012006	0.0219007
cg15995695	1	179334675	AXDND1	rs4652428:179598763:A:G	chr1	179598763	3.99123	0.0162694	0.00012009	0.0219049
cg07758738	18	12911528	NA	rs9675657:12920659:C:G	chr18	12920659	-3.98948	-0.0211341	0.00012086	0.0220143
cg02532538	17	33787739	NA	rs226422:34061659:A:C	chr17	34061659	-3.98716	-0.0134532	0.00012189	0.0221642
cg15995695	1	179334675	AXDND1	rs61826406:179590352:C:T	chr1	179590352	3.9846	0.0162718	0.00012304	0.0223309
cg15995695	1	179334675	AXDND1	rs148252845:179540321:C:T	chr1	179540321	3.98225	0.0160363	0.00012411	0.022485
cg15995695	1	179334675	AXDND1	rs4443850:179588226:G:A	chr1	179588226	-3.98169	-0.0162658	0.00012436	0.0225227
cg14901671	17	70589079	NA	rs1177985:70578448:G:T	chr17	70578448	3.98141	0.0105205	0.00012449	0.0225415
cg05725804	5	114516219	TRIM36	rs4705516	chr5	114404806	-3.9814	-0.0121153	0.0001245	0.0225427
cg06644373	2	200321348	SATB2	rs149186757:200640800:C:T	chr2	200640800	-3.9792	-0.0320823	0.0001255	0.0226883
cg23779890	8	75262522	GDAP1	rs7005208:75457750:A:G	chr8	75457750	3.97895	0.0133639	0.00012562	0.0227043
cg23779890	8	75262522	GDAP1	rs6472861:75449070:A:G	chr8	75449070	3.97817	0.0133614	0.00012598	0.0227549
cg15995695	1	179334675	AXDND1	rs11581659:179330173:C:T	chr1	179330173	3.9771	0.0163972	0.00012647	0.0228271
cg15995695	1	179334675	AXDND1	rs6425536:179333098:T:A	chr1	179333098	3.9771	0.0163972	0.00012647	0.0228271
cg04809453	16	1030383	SOX8	rs9941176:963843:A:G	chr16	963843	-3.97534	-0.0279848	0.00012729	0.0229475
cg08715231	8	25906064	NA	rs6557876:25900675:C:T	chr8	25900675	3.97418	0.0117184	0.00012783	0.0230253
cg23779890	8	75262522	GDAP1	rs6995226:75452696:C:A	chr8	75452696	3.97236	0.0133374	0.00012869	0.0231462
cg15995695	1	179334675	AXDND1	rs12128260:179572504:T:C	chr1	179572504	-3.97191	-0.0188101	0.0001289	0.023175
cg15995695	1	179334675	AXDND1	rs12134090	chr1	179575782	-3.97191	-0.0188101	0.0001289	0.023175
cg15995695	1	179334675	AXDND1	rs2209920:179572086:T:C	chr1	179572086	-3.97191	-0.0188101	0.0001289	0.023175
cg23779890	8	75262522	GDAP1	rs6996209:75453357:A:G	chr8	75453357	3.97051	0.0133318	0.00012956	0.0232707
cg23779890	8	75262522	GDAP1	rs7015958	chr8	75453034	3.97051	0.0133318	0.00012956	0.0232707
cg23779890	8	75262522	GDAP1	rs13282533:75454141:T:A	chr8	75454141	3.96997	0.0133308	0.00012982	0.0233077
cg08715231	8	25906064	NA	rs7002640:25900969:C:T	chr8	25900969	3.96923	0.011709	0.00013017	0.0233554
cg02532538	17	33787739	NA	rs226420	chr17	34065393	-3.9679	-0.0133524	0.00013081	0.0234462
cg02532538	17	33787739	NA	rs226421	chr17	34061989	-3.9679	-0.0133524	0.00013081	0.0234462
cg02532538	17	33787739	NA	rs178940:34062686:T:A	chr17	34062686	-3.9679	-0.0133524	0.00013081	0.0234462
cg22995692	5	141263164	NA	rs1427999:141297272:G:C	chr5	141297272	3.96766	0.0137164	0.00013092	0.0234629
cg15995695	1	179334675	AXDND1	rs12042786:179663834:T:C	chr1	179663834	-3.96735	-0.0146104	0.00013107	0.0234844
cg09817427	6	85474313	TBX18	rs215935	chr6	85489616	-3.96585	-0.0088124	0.00013179	0.0235867
cg09817427	6	85474313	TBX18	rs215916:85511388:G:C	chr6	85511388	-3.96585	-0.0088124	0.00013179	0.0235867
cg09817427	6	85474313	TBX18	rs215922	chr6	85521035	-3.96585	-0.0088124	0.00013179	0.0235867
cg09817427	6	85474313	TBX18	rs215937:85491372:C:G	chr6	85491372	-3.96585	-0.0088124	0.00013179	0.0235867
cg09817427	6	85474313	TBX18	rs215917:85512608:C:T	chr6	85512608	-3.96585	-0.0088124	0.00013179	0.0235867
cg09817427	6	85474313	TBX18	rs858734:85482092:G:T	chr6	85482092	-3.96567	-0.008812	0.00013188	0.0235984
cg09817427	6	85474313	TBX18	rs858733:85480909:G:A	chr6	85480909	-3.9655	-0.0088117	0.00013196	0.0236108
cg15995695	1	179334675	AXDND1	rs4480322:179665347:A:C	chr1	179665347	-3.96482	-0.014606	0.00013229	0.0236563
cg03854796	11	31819162	PAX6	rs140050165:32304234:G:A	chr11	32304234	-3.96467	-0.0191292	0.00013236	0.0236669
cg26921969	5	92948217	NA	rs9717098:93187937:C:T	chr5	93187937	3.96448	0.037925	0.00013245	0.0236803
cg06470822	6	28175283	NA	rs9461434:28102465:A:C	chr6	28102465	-3.96423	-0.0135456	0.00013258	0.0236984
cg23779890	8	75262522	GDAP1	rs12708064:75448057:A:G	chr8	75448057	3.96117	0.0129111	0.00013407	0.0239116
cg02225085	5	87975992	LINC00461	rs11954504:88201920:G:A	chr5	88201920	3.95978	0.0162609	0.00013475	0.0240092
cg15995695	1	179334675	AXDND1	rs151036423:179669079:T:C	chr1	179669079	-3.95945	-0.0145891	0.00013491	0.0240331
cg15995695	1	179334675	AXDND1	rs6700202:179668962:T:G	chr1	179668962	-3.95944	-0.0145886	0.00013492	0.0240336
cg13154880	4	48486472	SLC10A4	rs955683:48720194:T:C	chr4	48720194	-3.95863	-0.0126029	0.00013532	0.0240913
cg13154880	4	48486472	SLC10A4	rs2354314:48721327:T:C	chr4	48721327	3.95863	0.0126029	0.00013532	0.0240913
cg06470822	6	28175283	NA	rs34477097:28197186:C:T	chr6	28197186	-3.95835	-0.0119285	0.00013545	0.0241091
cg06470822	6	28175283	NA	rs9461443:28194629:A:T	chr6	28194629	-3.95835	-0.0119285	0.00013545	0.0241091
cg06470822	6	28175283	NA	rs200994	chr6	27813813	-3.95792	-0.0129436	0.00013567	0.0241392
cg08660876	4	154681323	RNF175	rs2404921	chr4	154988567	-3.95791	-0.0118181	0.00013567	0.0241395
cg08715231	8	25906064	NA	rs901176:25903178:G:A	chr8	25903178	3.95771	0.0116832	0.00013577	0.0241534
cg08715231	8	25906064	NA	rs1077670	chr8	25903383	3.95771	0.0116832	0.00013577	0.0241534
cg08715231	8	25906064	NA	rs1466562	chr8	25901579	3.95771	0.0116832	0.00013577	0.0241534
cg08715231	8	25906064	NA	rs1008974:25904488:G:T	chr8	25904488	3.95771	0.0116832	0.00013577	0.0241534
cg08715231	8	25906064	NA	rs28416181:25905963:T:G	chr8	25905963	3.95771	0.0116832	0.00013577	0.0241534
cg08715231	8	25906064	NA	rs1077668:25903639:A:C	chr8	25903639	3.95771	0.0116832	0.00013577	0.0241534
cg08715231	8	25906064	NA	rs9314318:25904388:G:A	chr8	25904388	3.95771	0.0116832	0.00013577	0.0241534
cg08715231	8	25906064	NA	rs1077671:25903768:G:C	chr8	25903768	3.95771	0.0116832	0.00013577	0.0241534
cg08715231	8	25906064	NA	rs7007677	chr8	25902501	3.95771	0.0116832	0.00013577	0.0241534
cg08715231	8	25906064	NA	rs901175:25903179:G:A	chr8	25903179	3.95771	0.0116832	0.00013577	0.0241534
cg08715231	8	25906064	NA	rs1077669:25903453:A:T	chr8	25903453	3.95771	0.0116832	0.00013577	0.0241534
cg08715231	8	25906064	NA	rs4871964:25908797:A:G	chr8	25908797	3.95771	0.0116832	0.00013577	0.0241534
cg08715231	8	25906064	NA	rs4872386:25901840:A:G	chr8	25901840	3.95771	0.0116832	0.00013577	0.0241534
cg08715231	8	25906064	NA	rs2874611:25906097:C:G	chr8	25906097	3.95771	0.0116832	0.00013577	0.0241534
cg08715231	8	25906064	NA	rs10105669:25905606:G:T	chr8	25905606	3.95759	0.0116838	0.00013583	0.0241622
cg05725804	5	114516219	TRIM36	rs6896529:114286650:A:G	chr5	114286650	3.95603	0.00986007	0.00013661	0.0242714
cg05467160	2	176945526	EVX2	rs4292064:176650137:A:G	chr2	176650137	3.95518	0.01457	0.00013703	0.0243316
cg26112929	7	5821500	RNF216	rs1640232:5647988:A:G	chr7	5647988	-3.95454	-0.0089841	0.00013735	0.0243762
cg00252781	1	179334658	AXDND1	rs4418554:179406476:T:A	chr1	179406476	3.95447	0.0169176	0.00013738	0.0243815
cg03876032	10	26501065	MYO3A	rs17665883:26227727:C:T	chr10	26227727	-3.95428	-0.0166536	0.00013748	0.024396
cg07758738	18	12911528	NA	rs74646701:12911366:C:A	chr18	12911366	-3.95374	-0.0300158	0.00013776	0.024435
cg07758738	18	12911528	NA	rs77601598:12911365:G:T	chr18	12911365	-3.9536	-0.0300146	0.00013782	0.0244441
cg13154880	4	48486472	SLC10A4	rs7678379:48481149:A:G	chr4	48481149	-3.95208	-0.0123915	0.00013859	0.0245541
cg04809453	16	1030383	SOX8	rs3809674:1030002:G:A	chr16	1030002	-3.94962	-0.0257621	0.00013984	0.0247293
cg14901671	17	70589079	NA	rs9899899:70589244:C:G	chr17	70589244	-3.94426	-0.0083002	0.0001426	0.0251127
cg04809453	16	1030383	SOX8	rs4984717:963337:G:A	chr16	963337	-3.94383	-0.0275971	0.00014282	0.0251435
cg04809453	16	1030383	SOX8	rs4984716:963104:G:A	chr16	963104	-3.94255	-0.0275909	0.00014349	0.0252364
cg22995692	5	141263164	NA	rs3861853	chr5	141299444	3.94239	0.0151478	0.00014357	0.0252481
cg22995692	5	141263164	NA	rs62379962	chr5	141299586	3.94239	0.0151478	0.00014357	0.0252481
cg03876032	10	26501065	MYO3A	rs10828900:26187605:T:C	chr10	26187605	-3.94183	-0.0171953	0.00014386	0.0252892
cg02225085	5	87975992	LINC00461	rs11949307:88191190:G:T	chr5	88191190	3.9381	0.0161503	0.00014583	0.025566
cg02225085	5	87975992	LINC00461	rs17560514:88189025:G:A	chr5	88189025	3.9381	0.0161503	0.00014583	0.025566
cg02225085	5	87975992	LINC00461	rs3850653	chr5	88186954	3.9381	0.0161503	0.00014583	0.025566
cg02225085	5	87975992	LINC00461	rs17560451:88184003:T:C	chr5	88184003	3.93675	0.0161466	0.00014655	0.0256693
cg02225085	5	87975992	LINC00461	rs17560407:88183651:A:G	chr5	88183651	3.93647	0.0161459	0.0001467	0.0256898
cg15995695	1	179334675	AXDND1	rs10798708	chr1	179647658	-3.9346	-0.0161446	0.0001477	0.0258304
cg15995695	1	179334675	AXDND1	rs4471227	chr1	179618113	-3.9346	-0.0161446	0.0001477	0.0258304
cg15995695	1	179334675	AXDND1	rs10913847:179614531:C:T	chr1	179614531	-3.9346	-0.0161446	0.0001477	0.0258304
cg02225085	5	87975992	LINC00461	rs62380364:88107337:C:A	chr5	88107337	-3.93437	-0.01391	0.00014783	0.025848
cg05725804	5	114516219	TRIM36	rs2974535:114422179:G:A	chr5	114422179	-3.93402	-0.0119643	0.00014801	0.0258736
cg15995695	1	179334675	AXDND1	rs4454502:179593609:C:A	chr1	179593609	-3.93247	-0.016158	0.00014885	0.0259886
cg11730703	14	105167607	INF2	rs10144190:105179081:G:A	chr14	105179081	3.93231	0.00743371	0.00014894	0.0260011
cg15995695	1	179334675	AXDND1	rs35401719:179486550:C:G	chr1	179486550	3.93209	0.0168812	0.00014906	0.026017
cg15995695	1	179334675	AXDND1	rs9699789:179504790:G:T	chr1	179504790	3.93204	0.0168804	0.00014909	0.0260203
cg15995695	1	179334675	AXDND1	rs34463289:179500358:G:T	chr1	179500358	3.93204	0.0168804	0.00014909	0.0260203
cg15995695	1	179334675	AXDND1	rs12724901:179497725:C:T	chr1	179497725	3.93204	0.0168804	0.00014909	0.0260203
cg05467160	2	176945526	EVX2	rs10197647	chr2	176652998	3.93044	0.0144886	0.00014995	0.0261401
cg04809453	16	1030383	SOX8	rs12930493:962946:A:G	chr16	962946	-3.93015	-0.0275726	0.00015012	0.0261591
cg16386080	9	90589146	CDK20	rs599953:90623475:A:G	chr9	90623475	3.92952	0.00864636	0.00015046	0.0262045
cg16386080	9	90589146	CDK20	rs11142053:90649747:G:A	chr9	90649747	-3.92593	-0.0095679	0.00015243	0.0264774
cg03876032	10	26501065	MYO3A	rs11014834:26186087:T:C	chr10	26186087	-3.92587	-0.0171313	0.00015247	0.026482
cg16386080	9	90589146	CDK20	rs11790648:90645440:A:G	chr9	90645440	-3.92461	-0.0095665	0.00015317	0.0265739
cg08376141	6	32116591	PRRT1	rs68141327:32535354:T:C	chr6	32535354	3.92441	0.0165876	0.00015328	0.0265895
cg03876032	10	26501065	MYO3A	rs10828898:26185949:G:A	chr10	26185949	-3.92287	-0.0171105	0.00015414	0.0267081
cg00252781	1	179334658	AXDND1	rs115983832:179540386:A:G	chr1	179540386	3.92137	0.0168745	0.00015498	0.026821
cg13154880	4	48486472	SLC10A4	rs13142540:48783587:T:C	chr4	48783587	-3.92049	-0.0124123	0.00015548	0.0268895
cg03876032	10	26501065	MYO3A	rs7908198:26174584:C:T	chr10	26174584	-3.91949	-0.0171764	0.00015604	0.0269668
cg15995695	1	179334675	AXDND1	rs12728097:179662216:C:G	chr1	179662216	-3.91836	-0.0177684	0.00015668	0.0270552
cg08715231	8	25906064	NA	rs1352026:25895899:C:T	chr8	25895899	3.91782	0.011384	0.00015699	0.0270979
cg23598080	1	180204499	LHX4	rs7528811:180113970:G:A	chr1	180113970	3.91697	0.0107863	0.00015748	0.0271648
cg00425710	16	56672671	MT1A	rs2291956:56692218:C:T	chr16	56692218	-3.91591	-0.0338182	0.00015808	0.0272487
cg09477019	16	56681945	NA	rs8063870:56886636:C:G	chr16	56886636	-3.91532	-0.0274632	0.00015842	0.0272949
cg09477019	16	56681945	NA	rs6499854	chr16	56880842	-3.91532	-0.0274632	0.00015842	0.0272949
cg09477019	16	56681945	NA	rs7192299:56856358:C:A	chr16	56856358	-3.91532	-0.0274632	0.00015842	0.0272949
cg09477019	16	56681945	NA	rs8054731:56888006:T:C	chr16	56888006	-3.91532	-0.0274632	0.00015842	0.0272949
cg09477019	16	56681945	NA	rs1865831:56874903:T:C	chr16	56874903	-3.91532	-0.0274632	0.00015842	0.0272949
cg09477019	16	56681945	NA	rs8048804:56844164:C:T	chr16	56844164	-3.91532	-0.0274632	0.00015842	0.0272949
cg09477019	16	56681945	NA	rs4368156:56874272:G:C	chr16	56874272	-3.91532	-0.0274632	0.00015842	0.0272949
cg09477019	16	56681945	NA	rs7184439:56867804:C:T	chr16	56867804	-3.91532	-0.0274632	0.00015842	0.0272949
cg09477019	16	56681945	NA	rs1347590:56847929:C:A	chr16	56847929	-3.91532	-0.0274632	0.00015842	0.0272949
cg09477019	16	56681945	NA	rs1529930:56890900:G:T	chr16	56890900	-3.91532	-0.0274632	0.00015842	0.0272949
cg09477019	16	56681945	NA	rs7195932:56749909:C:T	chr16	56749909	-3.91528	-0.0272294	0.00015844	0.0272979
cg09477019	16	56681945	NA	rs7196117:56749994:C:T	chr16	56749994	-3.91528	-0.0272294	0.00015844	0.0272979
cg09477019	16	56681945	NA	rs11647228:56748043:G:A	chr16	56748043	-3.91525	-0.0272295	0.00015846	0.0273002
cg15995695	1	179334675	AXDND1	rs16854513:179662363:A:G	chr1	179662363	-3.91521	-0.0177524	0.00015849	0.0273036
cg09477019	16	56681945	NA	rs4238790:56783481:C:T	chr16	56783481	-3.91496	-0.0272278	0.00015863	0.0273234
cg09477019	16	56681945	NA	rs4784725:56761208:A:G	chr16	56761208	-3.91496	-0.0272278	0.00015863	0.0273234
cg09477019	16	56681945	NA	rs4783958:56781830:C:T	chr16	56781830	-3.91496	-0.0272278	0.00015863	0.0273234
cg09477019	16	56681945	NA	rs9302684:56790352:A:G	chr16	56790352	-3.91496	-0.0272278	0.00015863	0.0273234
cg09477019	16	56681945	NA	rs8061132:56776187:G:T	chr16	56776187	-3.91496	-0.0272278	0.00015863	0.0273234
cg09477019	16	56681945	NA	rs7203408:56775517:C:T	chr16	56775517	-3.91496	-0.0272278	0.00015863	0.0273234
cg09477019	16	56681945	NA	rs8052546:56747362:A:G	chr16	56747362	-3.91489	-0.0272274	0.00015867	0.027329
cg09477019	16	56681945	NA	rs4238789:56742746:T:C	chr16	56742746	-3.91471	-0.0272264	0.00015877	0.027344
cg09477019	16	56681945	NA	rs8044813:56746307:G:C	chr16	56746307	-3.91203	-0.0272278	0.00016032	0.0275543
cg16386080	9	90589146	CDK20	rs113100932:90650391:C:T	chr9	90650391	-3.91188	-0.0095431	0.00016041	0.0275669
cg22995692	5	141263164	NA	rs4912787:141297123:T:A	chr5	141297123	3.91141	0.0151203	0.00016068	0.0276029
cg04809453	16	1030383	SOX8	rs960072:982832:G:C	chr16	982832	-3.91133	-0.026057	0.00016073	0.027609
cg03876032	10	26501065	MYO3A	rs7907646	chr10	26174841	-3.91131	-0.0170301	0.00016074	0.0276108
cg00252781	1	179334658	AXDND1	rs12135111:179370922:G:A	chr1	179370922	3.9105	0.0165093	0.00016121	0.0276734
cg13696752	9	4662858	SPATA6L	rs7035489:4671443:C:T	chr9	4671443	3.90843	0.0152212	0.00016243	0.0278394
cg08084860	2	237080340	NA	rs10178156:236718109:A:G	chr2	236718109	3.90698	0.00964964	0.00016328	0.0279541
cg15995695	1	179334675	AXDND1	rs10798694:179549980:G:A	chr1	179549980	-3.9063	-0.0153799	0.00016369	0.0280072
cg09477019	16	56681945	NA	rs1865832:56884665:G:T	chr16	56884665	-3.90594	-0.027417	0.0001639	0.0280364
cg00252781	1	179334658	AXDND1	rs11333365:179380994:T:A	chr1	179380994	3.9057	0.0166265	0.00016404	0.0280555
cg09477019	16	56681945	NA	rs8060450:56881644:T:A	chr16	56881644	-3.90448	-0.0274042	0.00016477	0.0281515
cg09477019	16	56681945	NA	rs1865833:56815200:A:G	chr16	56815200	3.9044	0.0275789	0.00016482	0.0281588
cg05725804	5	114516219	TRIM36	rs3925317:114288639:C:G	chr5	114288639	3.9043	0.00999678	0.00016487	0.0281659
cg06470822	6	28175283	NA	rs9380018:27740646:A:G	chr6	27740646	-3.90256	-0.0224222	0.00016592	0.0283098
cg06470822	6	28175283	NA	rs17693877	chr6	27707046	-3.90256	-0.0224222	0.00016592	0.0283098
cg08715231	8	25906064	NA	rs901178:25894275:T:G	chr8	25894275	3.89865	0.0113615	0.00016828	0.028626
cg15995695	1	179334675	AXDND1	rs4329461:179664188:T:C	chr1	179664188	-3.89793	-0.017663	0.00016872	0.0286857
cg15995695	1	179334675	AXDND1	rs7513736:179370058:A:G	chr1	179370058	3.89771	0.0160228	0.00016885	0.0287051
cg13696752	9	4662858	SPATA6L	rs6476893:4671409:C:A	chr9	4671409	3.89604	0.0154394	0.00016987	0.0288442
cg10757065	2	223165891	CCDC140	rs6717451:223167285:T:C	chr2	223167285	-3.89417	-0.0076888	0.00017103	0.0290002
cg13696752	9	4662858	SPATA6L	rs1385454:4670642:G:A	chr9	4670642	3.8934	0.0154349	0.00017151	0.029065
cg07758738	18	12911528	NA	rs138087972:12910299:A:G	chr18	12910299	-3.89224	-0.0294322	0.00017222	0.0291619
cg16386080	9	90589146	CDK20	rs555592	chr9	90583056	3.89219	0.00849607	0.00017226	0.0291666
cg03876032	10	26501065	MYO3A	rs7084885:26222201:C:T	chr10	26222201	-3.89147	-0.0163053	0.0001727	0.029225
cg13696752	9	4662858	SPATA6L	rs28720069:4674727:G:A	chr9	4674727	3.89138	0.0152225	0.00017276	0.0292326
cg13696752	9	4662858	SPATA6L	rs16921782:4670573:C:T	chr9	4670573	3.89131	0.0154294	0.00017281	0.0292384
cg13696752	9	4662858	SPATA6L	rs16921778:4670525:A:G	chr9	4670525	3.89021	0.0154266	0.00017349	0.0293274
cg05467160	2	176945526	EVX2	rs7567121	chr2	176654894	3.88993	0.014615	0.00017367	0.0293506
cg13696752	9	4662858	SPATA6L	rs28536049:4674695:A:G	chr9	4674695	3.88871	0.0152087	0.00017443	0.0294547
cg13696752	9	4662858	SPATA6L	rs28534906:4674736:C:A	chr9	4674736	3.88298	0.015192	0.00017808	0.0299467
cg13696752	9	4662858	SPATA6L	rs28477786:4674722:T:C	chr9	4674722	3.88298	0.015192	0.00017808	0.0299467
cg16386080	9	90589146	CDK20	rs560019	chr9	90583521	3.88019	0.00888014	0.00017988	0.0301867
cg13696752	9	4662858	SPATA6L	rs7870823:4673941:G:A	chr9	4673941	3.88006	0.0150743	0.00017997	0.030198
cg11730703	14	105167607	INF2	rs6576058:105163560:T:C	chr14	105163560	-3.87999	-0.0072377	0.00018001	0.0302028
cg13696752	9	4662858	SPATA6L	rs10974722:4672712:T:C	chr9	4672712	3.87993	0.015074	0.00018005	0.0302075
cg13696752	9	4662858	SPATA6L	rs2093569:4676012:G:C	chr9	4676012	3.87993	0.015074	0.00018005	0.0302075
cg13696752	9	4662858	SPATA6L	rs7032241:4673272:T:C	chr9	4673272	3.87993	0.015074	0.00018005	0.0302075
cg13696752	9	4662858	SPATA6L	rs13294315:4676405:G:C	chr9	4676405	3.87993	0.015074	0.00018005	0.0302075
cg13696752	9	4662858	SPATA6L	rs7044438:4673780:C:T	chr9	4673780	3.87993	0.015074	0.00018005	0.0302075
cg13696752	9	4662858	SPATA6L	rs7857844:4677015:C:G	chr9	4677015	3.87993	0.015074	0.00018005	0.0302075
cg13696752	9	4662858	SPATA6L	rs1385453	chr9	4671022	3.87993	0.015074	0.00018005	0.0302075
cg13696752	9	4662858	SPATA6L	rs7858103:4677218:C:A	chr9	4677218	3.87993	0.015074	0.00018005	0.0302075
cg13696752	9	4662858	SPATA6L	rs10815055:4675543:C:T	chr9	4675543	3.87993	0.015074	0.00018005	0.0302075
cg13696752	9	4662858	SPATA6L	rs11999594:4672480:G:A	chr9	4672480	3.87993	0.015074	0.00018005	0.0302075
cg13696752	9	4662858	SPATA6L	rs7863799:4674193:T:C	chr9	4674193	3.87993	0.015074	0.00018005	0.0302075
cg13696752	9	4662858	SPATA6L	rs56232295:4674408:A:C	chr9	4674408	3.87993	0.015074	0.00018005	0.0302075
cg13696752	9	4662858	SPATA6L	rs13293999:4676266:G:T	chr9	4676266	3.87993	0.015074	0.00018005	0.0302075
cg13696752	9	4662858	SPATA6L	rs12336195:4671838:G:T	chr9	4671838	3.87993	0.015074	0.00018005	0.0302075
cg13696752	9	4662858	SPATA6L	rs7020798:4671707:A:T	chr9	4671707	3.87993	0.015074	0.00018005	0.0302075
cg13696752	9	4662858	SPATA6L	rs7869881:4676998:A:G	chr9	4676998	3.87993	0.015074	0.00018005	0.0302075
cg13696752	9	4662858	SPATA6L	rs7847302:4677453:T:C	chr9	4677453	3.87993	0.015074	0.00018005	0.0302075
cg13696752	9	4662858	SPATA6L	rs7032804:4673641:T:A	chr9	4673641	3.87993	0.015074	0.00018005	0.0302075
cg13696752	9	4662858	SPATA6L	rs10974723:4672750:T:C	chr9	4672750	3.87993	0.015074	0.00018005	0.0302075
cg13696752	9	4662858	SPATA6L	rs10974721:4672692:T:C	chr9	4672692	3.87993	0.015074	0.00018005	0.0302075
cg13696752	9	4662858	SPATA6L	rs2381178:4675672:G:C	chr9	4675672	3.87993	0.015074	0.00018005	0.0302075
cg13696752	9	4662858	SPATA6L	rs7029306:4673549:A:C	chr9	4673549	3.87993	0.015074	0.00018005	0.0302075
cg13696752	9	4662858	SPATA6L	rs10974719:4671957:G:A	chr9	4671957	3.87993	0.015074	0.00018005	0.0302075
cg13696752	9	4662858	SPATA6L	rs28437251:4676911:A:C	chr9	4676911	3.87993	0.015074	0.00018005	0.0302075
cg13696752	9	4662858	SPATA6L	rs56064503:4674406:A:T	chr9	4674406	3.87957	0.0150734	0.00018028	0.0302395
cg05725804	5	114516219	TRIM36	rs13175861	chr5	114288319	3.87942	0.0100818	0.00018038	0.0302524
cg05725804	5	114516219	TRIM36	rs10478215	chr5	114287609	3.87942	0.0100818	0.00018038	0.0302524
cg13154880	4	48486472	SLC10A4	rs7438713:48467192:C:T	chr4	48467192	3.87923	0.0118527	0.0001805	0.0302687
cg13696752	9	4662858	SPATA6L	rs7043933:4673389:C:A	chr9	4673389	3.87896	0.0150727	0.00018068	0.0302924
cg13696752	9	4662858	SPATA6L	rs7032499:4673417:T:C	chr9	4673417	3.87896	0.0150727	0.00018068	0.0302924
cg22995692	5	141263164	NA	rs6876850:141290062:T:C	chr5	141290062	3.87613	0.0137676	0.00018253	0.0305285
cg22995692	5	141263164	NA	rs1896619:141285895:A:G	chr5	141285895	3.87613	0.0137676	0.00018253	0.0305285
cg22995692	5	141263164	NA	rs6862407:141286343:G:A	chr5	141286343	3.87613	0.0137676	0.00018253	0.0305285
cg22995692	5	141263164	NA	rs4912617:141287320:A:C	chr5	141287320	3.87613	0.0137676	0.00018253	0.0305285
cg22995692	5	141263164	NA	rs13158932:141293859:C:G	chr5	141293859	3.87598	0.0149937	0.00018263	0.0305408
cg05725804	5	114516219	TRIM36	rs12517851:114325660:A:G	chr5	114325660	3.87532	0.00997564	0.00018306	0.0305972
cg08715231	8	25906064	NA	rs28692966:25892919:G:A	chr8	25892919	3.87305	0.0112894	0.00018457	0.030797
cg22995692	5	141263164	NA	rs4912784:141287081:C:T	chr5	141287081	3.87222	0.0149785	0.00018512	0.0308698
cg22995692	5	141263164	NA	rs13181191:141285127:C:T	chr5	141285127	3.87222	0.0149785	0.00018512	0.0308698
cg22995692	5	141263164	NA	rs60144534:141287735:T:C	chr5	141287735	3.87222	0.0149785	0.00018512	0.0308698
cg22995692	5	141263164	NA	rs890761	chr5	141284056	3.87222	0.0149785	0.00018512	0.0308698
cg22995692	5	141263164	NA	rs4426945:141285459:T:A	chr5	141285459	3.87222	0.0149785	0.00018512	0.0308698
cg22995692	5	141263164	NA	rs17287085:141284815:A:G	chr5	141284815	3.87222	0.0149785	0.00018512	0.0308698
cg22995692	5	141263164	NA	rs4912785:141291380:C:A	chr5	141291380	3.87222	0.0149785	0.00018512	0.0308698
cg22995692	5	141263164	NA	rs2974705:141289161:C:T	chr5	141289161	3.87191	0.0149805	0.00018533	0.030898
cg06644373	2	200321348	SATB2	rs62180595:200531000:A:G	chr2	200531000	-3.87186	-0.033753	0.00018536	0.0309015
cg13154880	4	48486472	SLC10A4	rs16861305	chr4	48466781	3.86868	0.0118254	0.00018749	0.0311876
cg14361627	7	130419116	KLF14	rs10267322:130914571:C:T	chr7	130914571	-3.86852	-0.0196676	0.0001876	0.0312022
cg04801402	6	46138912	ENPP5	rs9472691:46092286:C:T	chr6	46092286	-3.86842	-0.0083829	0.00018767	0.0312117
cg00252781	1	179334658	AXDND1	rs201298419	chr1	179402037	-3.86693	-0.0163226	0.00018868	0.0313396
cg00252781	1	179334658	AXDND1	rs11582293:179412377:C:G	chr1	179412377	3.86683	0.016567	0.00018874	0.0313483
cg00252781	1	179334658	AXDND1	rs10913760:179412386:G:A	chr1	179412386	3.86683	0.016567	0.00018874	0.0313483
cg00252781	1	179334658	AXDND1	rs4345774:179376524:G:A	chr1	179376524	3.86636	0.0165654	0.00018906	0.0313898
cg00252781	1	179334658	AXDND1	rs7550736:179401599:C:T	chr1	179401599	3.86636	0.0165654	0.00018906	0.0313898
cg00252781	1	179334658	AXDND1	rs12758415:179387050:T:C	chr1	179387050	3.86636	0.0165654	0.00018906	0.0313898
cg00252781	1	179334658	AXDND1	rs4454499:179409591:C:G	chr1	179409591	3.86636	0.0165654	0.00018906	0.0313898
cg00252781	1	179334658	AXDND1	rs4625244:179373771:A:C	chr1	179373771	3.86636	0.0165654	0.00018906	0.0313898
cg00252781	1	179334658	AXDND1	rs12722736:179415227:G:T	chr1	179415227	3.86636	0.0165654	0.00018906	0.0313898
cg00252781	1	179334658	AXDND1	rs7513973:179394212:T:A	chr1	179394212	3.86636	0.0165654	0.00018906	0.0313898
cg00252781	1	179334658	AXDND1	rs12729895:179411422:G:A	chr1	179411422	3.86636	0.0165654	0.00018906	0.0313898
cg00252781	1	179334658	AXDND1	rs12741747:179375979:C:G	chr1	179375979	3.86636	0.0165654	0.00018906	0.0313898
cg00252781	1	179334658	AXDND1	rs12723024:179375852:A:G	chr1	179375852	3.86636	0.0165654	0.00018906	0.0313898
cg00252781	1	179334658	AXDND1	rs12410988:179383811:C:T	chr1	179383811	3.86636	0.0165654	0.00018906	0.0313898
cg00252781	1	179334658	AXDND1	rs11578241:179412124:G:C	chr1	179412124	3.86636	0.0165654	0.00018906	0.0313898
cg00252781	1	179334658	AXDND1	rs12729775:179410693:C:T	chr1	179410693	3.86636	0.0165654	0.00018906	0.0313898
cg00252781	1	179334658	AXDND1	rs11582255:179412144:C:T	chr1	179412144	3.86636	0.0165654	0.00018906	0.0313898
cg00252781	1	179334658	AXDND1	rs4562582:179373655:C:A	chr1	179373655	3.86636	0.0165654	0.00018906	0.0313898
cg00252781	1	179334658	AXDND1	rs12409903:179402340:A:G	chr1	179402340	3.86636	0.0165654	0.00018906	0.0313898
cg00252781	1	179334658	AXDND1	rs4233180:179372286:A:G	chr1	179372286	3.86636	0.0165654	0.00018906	0.0313898
cg00252781	1	179334658	AXDND1	rs12744251:179411977:G:A	chr1	179411977	3.86636	0.0165654	0.00018906	0.0313898
cg00252781	1	179334658	AXDND1	rs7554103:179393930:A:G	chr1	179393930	3.86636	0.0165654	0.00018906	0.0313898
cg00252781	1	179334658	AXDND1	rs10913755:179408411:A:C	chr1	179408411	3.86636	0.0165654	0.00018906	0.0313898
cg00252781	1	179334658	AXDND1	rs7550656:179401559:C:T	chr1	179401559	3.86636	0.0165654	0.00018906	0.0313898
cg00252781	1	179334658	AXDND1	rs12757695:179378743:C:T	chr1	179378743	3.86636	0.0165654	0.00018906	0.0313898
cg00252781	1	179334658	AXDND1	rs10913761:179412443:A:G	chr1	179412443	3.86636	0.0165654	0.00018906	0.0313898
cg00252781	1	179334658	AXDND1	rs12738920:179378451:T:G	chr1	179378451	3.86636	0.0165654	0.00018906	0.0313898
cg00252781	1	179334658	AXDND1	rs7521106:179399388:G:A	chr1	179399388	3.86636	0.0165654	0.00018906	0.0313898
cg00252781	1	179334658	AXDND1	rs12757935:179392930:A:C	chr1	179392930	3.86636	0.0165654	0.00018906	0.0313898
cg00252781	1	179334658	AXDND1	rs12757723:179378791:C:A	chr1	179378791	3.86636	0.0165654	0.00018906	0.0313898
cg00252781	1	179334658	AXDND1	rs7513782:179393986:T:C	chr1	179393986	3.86636	0.0165654	0.00018906	0.0313898
cg00252781	1	179334658	AXDND1	rs4626840:179376161:C:T	chr1	179376161	3.86636	0.0165654	0.00018906	0.0313898
cg00252781	1	179334658	AXDND1	rs4366280:179409018:T:G	chr1	179409018	3.86636	0.0165654	0.00018906	0.0313898
cg00252781	1	179334658	AXDND1	rs12746452:179377236:G:A	chr1	179377236	3.86636	0.0165654	0.00018906	0.0313898
cg00252781	1	179334658	AXDND1	rs12729491:179416484:C:A	chr1	179416484	3.86636	0.0165654	0.00018906	0.0313898
cg00252781	1	179334658	AXDND1	rs58836785:179416346:T:C	chr1	179416346	3.86636	0.0165654	0.00018906	0.0313898
cg00252781	1	179334658	AXDND1	rs10913753:179400260:A:G	chr1	179400260	3.86636	0.0165654	0.00018906	0.0313898
cg00252781	1	179334658	AXDND1	rs12727075:179382042:A:G	chr1	179382042	3.86636	0.0165654	0.00018906	0.0313898
cg00252781	1	179334658	AXDND1	rs12727704:179382426:A:T	chr1	179382426	3.86636	0.0165654	0.00018906	0.0313898
cg00252781	1	179334658	AXDND1	rs11586744:179386253:T:C	chr1	179386253	3.86636	0.0165654	0.00018906	0.0313898
cg00252781	1	179334658	AXDND1	rs12401957:179413468:A:C	chr1	179413468	3.86636	0.0165654	0.00018906	0.0313898
cg00252781	1	179334658	AXDND1	rs11802625:179410094:G:A	chr1	179410094	3.86636	0.0165654	0.00018906	0.0313898
cg00252781	1	179334658	AXDND1	rs7551894:179396822:C:G	chr1	179396822	3.86636	0.0165654	0.00018906	0.0313898
cg00252781	1	179334658	AXDND1	rs11802862:179397933:C:A	chr1	179397933	3.86636	0.0165654	0.00018906	0.0313898
cg00252781	1	179334658	AXDND1	rs12755534:179391341:G:T	chr1	179391341	3.86636	0.0165654	0.00018906	0.0313898
cg00252781	1	179334658	AXDND1	rs12730070:179410843:C:T	chr1	179410843	3.86636	0.0165654	0.00018906	0.0313898
cg00252781	1	179334658	AXDND1	rs4652375:179371781:A:G	chr1	179371781	3.86636	0.0165654	0.00018906	0.0313898
cg00252781	1	179334658	AXDND1	rs10913752:179400125:G:A	chr1	179400125	3.86636	0.0165654	0.00018906	0.0313898
cg00252781	1	179334658	AXDND1	rs9662026:179393803:G:T	chr1	179393803	3.86636	0.0165654	0.00018906	0.0313898
cg00252781	1	179334658	AXDND1	rs11577579	chr1	179414105	3.86636	0.0165654	0.00018906	0.0313898
cg00252781	1	179334658	AXDND1	rs12730909:179404152:C:T	chr1	179404152	3.86636	0.0165654	0.00018906	0.0313898
cg00252781	1	179334658	AXDND1	rs4651026:179395448:A:G	chr1	179395448	3.86636	0.0165654	0.00018906	0.0313898
cg00252781	1	179334658	AXDND1	rs12409337:179392000:G:A	chr1	179392000	3.86636	0.0165654	0.00018906	0.0313898
cg00252781	1	179334658	AXDND1	rs138209416:179388149:C:T	chr1	179388149	3.86636	0.0165654	0.00018906	0.0313898
cg00252781	1	179334658	AXDND1	rs11802624:179410090:G:A	chr1	179410090	3.86636	0.0165654	0.00018906	0.0313898
cg00252781	1	179334658	AXDND1	rs11811198:179397523:T:C	chr1	179397523	3.86636	0.0165654	0.00018906	0.0313898
cg00252781	1	179334658	AXDND1	rs12756900:179378925:G:A	chr1	179378925	3.86636	0.0165654	0.00018906	0.0313898
cg00252781	1	179334658	AXDND1	rs10913766	chr1	179416956	3.86636	0.0165654	0.00018906	0.0313898
cg00252781	1	179334658	AXDND1	rs12408443:179391910:T:C	chr1	179391910	3.86636	0.0165654	0.00018906	0.0313898
cg00252781	1	179334658	AXDND1	rs4651027:179395451:A:G	chr1	179395451	3.86636	0.0165654	0.00018906	0.0313898
cg00252781	1	179334658	AXDND1	rs36046838:179385529:T:A	chr1	179385529	3.86636	0.0165654	0.00018906	0.0313898
cg00252781	1	179334658	AXDND1	rs11582754:179412886:C:G	chr1	179412886	3.86636	0.0165654	0.00018906	0.0313898
cg00252781	1	179334658	AXDND1	rs4652383:179398875:T:A	chr1	179398875	3.86636	0.0165654	0.00018906	0.0313898
cg00252781	1	179334658	AXDND1	rs61821011:179416241:A:G	chr1	179416241	3.86636	0.0165654	0.00018906	0.0313898
cg00252781	1	179334658	AXDND1	rs12746612:179376654:C:T	chr1	179376654	3.86636	0.0165654	0.00018906	0.0313898
cg00252781	1	179334658	AXDND1	rs12744535:179372545:A:G	chr1	179372545	3.86636	0.0165654	0.00018906	0.0313898
cg00252781	1	179334658	AXDND1	rs12407502:179383839:T:C	chr1	179383839	3.86636	0.0165654	0.00018906	0.0313898
cg00252781	1	179334658	AXDND1	rs10913762:179412525:T:C	chr1	179412525	3.86636	0.0165654	0.00018906	0.0313898
cg00252781	1	179334658	AXDND1	rs56837493:179416335:C:T	chr1	179416335	3.86636	0.0165654	0.00018906	0.0313898
cg00252781	1	179334658	AXDND1	rs7532155:179415937:T:C	chr1	179415937	3.86636	0.0165654	0.00018906	0.0313898
cg00252781	1	179334658	AXDND1	rs143342673:179388504:C:T	chr1	179388504	3.86636	0.0165654	0.00018906	0.0313898
cg00252781	1	179334658	AXDND1	rs4130266	chr1	179415532	3.86636	0.0165654	0.00018906	0.0313898
cg00252781	1	179334658	AXDND1	rs4652379:179395375:T:C	chr1	179395375	3.86636	0.0165654	0.00018906	0.0313898
cg00252781	1	179334658	AXDND1	rs10913768:179417101:T:G	chr1	179417101	3.86621	0.0165652	0.00018917	0.0314033
cg00252781	1	179334658	AXDND1	rs10913767:179417068:A:G	chr1	179417068	3.86621	0.0165652	0.00018917	0.0314033
cg00252781	1	179334658	AXDND1	rs11802637:179410168:G:A	chr1	179410168	3.86585	0.0165519	0.00018941	0.0314362
cg00252781	1	179334658	AXDND1	rs12749810:179373287:T:G	chr1	179373287	3.86561	0.0165629	0.00018958	0.0314567
cg00252781	1	179334658	AXDND1	rs12724496:179417549:T:C	chr1	179417549	3.86549	0.0165639	0.00018966	0.0314675
cg00252781	1	179334658	AXDND1	rs12724634:179417614:T:C	chr1	179417614	3.86523	0.0165634	0.00018983	0.0314905
cg00252781	1	179334658	AXDND1	rs12739116:179417682:C:G	chr1	179417682	3.86515	0.0165633	0.00018989	0.0314977
cg00252781	1	179334658	AXDND1	rs12406974:179377544:A:G	chr1	179377544	3.86484	0.0165648	0.0001901	0.0315258
cg14361627	7	130419116	KLF14	rs10276927	chr7	130917360	-3.86469	-0.0206736	0.0001902	0.0315389
cg14361627	7	130419116	KLF14	rs28515559:130917825:A:G	chr7	130917825	-3.86469	-0.0206736	0.0001902	0.0315389
cg14361627	7	130419116	KLF14	rs10280181:130917808:C:T	chr7	130917808	-3.86469	-0.0206736	0.0001902	0.0315389
cg00252781	1	179334658	AXDND1	rs10913769:179418056:G:T	chr1	179418056	3.86419	0.0165615	0.00019055	0.0315856
cg00252781	1	179334658	AXDND1	rs10913770:179418132:C:T	chr1	179418132	3.86377	0.0165607	0.00019083	0.031623
cg00252781	1	179334658	AXDND1	rs10913771:179418181:T:C	chr1	179418181	3.86361	0.0165605	0.00019094	0.0316374
cg00252781	1	179334658	AXDND1	rs10913754:179400384:C:T	chr1	179400384	3.86297	0.0165433	0.00019138	0.031697
cg00252781	1	179334658	AXDND1	rs12738929:179417524:C:G	chr1	179417524	3.86104	0.0165366	0.00019272	0.0318703
cg15995695	1	179334675	AXDND1	rs4651048:179657316:A:G	chr1	179657316	3.86102	0.0155318	0.00019273	0.0318722
cg11730703	14	105167607	INF2	rs12433350:105189056:G:A	chr14	105189056	3.86085	0.00706623	0.00019285	0.0318875
cg07758738	18	12911528	NA	rs79054648:12898005:C:T	chr18	12898005	-3.86067	-0.0290751	0.00019298	0.0319043
cg00252781	1	179334658	AXDND1	rs12744976:179418990:C:T	chr1	179418990	3.85977	0.0165529	0.0001936	0.0319858
cg06470822	6	28175283	NA	rs13437444:28070998:C:T	chr6	28070998	-3.85963	-0.0133597	0.0001937	0.0319983
cg15995695	1	179334675	AXDND1	rs1410594:179583165:G:A	chr1	179583165	-3.85922	-0.0151512	0.00019398	0.0320356
cg07758738	18	12911528	NA	rs149280326:12900878:G:A	chr18	12900878	-3.85882	-0.0290181	0.00019426	0.0320721
cg07758738	18	12911528	NA	rs8089518:12898564:C:G	chr18	12898564	-3.85882	-0.0290181	0.00019426	0.0320721
cg07758738	18	12911528	NA	rs8083335	chr18	12902446	-3.85882	-0.0290181	0.00019426	0.0320721
cg07758738	18	12911528	NA	rs8092206:12895629:C:G	chr18	12895629	-3.85882	-0.0290181	0.00019426	0.0320721
cg07758738	18	12911528	NA	rs8090005:12898759:G:A	chr18	12898759	-3.85882	-0.0290181	0.00019426	0.0320721
cg15995695	1	179334675	AXDND1	rs4651043:179582680:A:T	chr1	179582680	-3.85715	-0.0151425	0.00019543	0.0322248
cg13696752	9	4662858	SPATA6L	rs13300292:4670338:G:A	chr9	4670338	3.85707	0.0152614	0.00019549	0.0322321
cg22719623	6	154360732	OPRM1	rs62436463:154390607:C:T	chr6	154390607	-3.85697	-0.021803	0.00019556	0.0322413
cg15995695	1	179334675	AXDND1	rs4378165:179440892:G:A	chr1	179440892	3.85664	0.0162158	0.00019579	0.0322717
cg15995695	1	179334675	AXDND1	rs148251388:179432857:T:C	chr1	179432857	3.85664	0.0162158	0.00019579	0.0322717
cg15995695	1	179334675	AXDND1	rs11582158:179476507:C:T	chr1	179476507	3.85664	0.0162158	0.00019579	0.0322717
cg15995695	1	179334675	AXDND1	rs61826003:179427369:T:C	chr1	179427369	3.85664	0.0162158	0.00019579	0.0322717
cg15995695	1	179334675	AXDND1	rs12407956:179440060:T:C	chr1	179440060	3.85664	0.0162158	0.00019579	0.0322717
cg15995695	1	179334675	AXDND1	rs61827668:179484502:A:G	chr1	179484502	3.85664	0.0162158	0.00019579	0.0322717
cg15995695	1	179334675	AXDND1	rs61826026:179434530:C:G	chr1	179434530	3.85664	0.0162158	0.00019579	0.0322717
cg15995695	1	179334675	AXDND1	rs12408627:179455186:G:A	chr1	179455186	3.85664	0.0162158	0.00019579	0.0322717
cg15995695	1	179334675	AXDND1	rs1576224:179447651:G:A	chr1	179447651	3.85664	0.0162158	0.00019579	0.0322717
cg15995695	1	179334675	AXDND1	rs12758828:179458472:A:G	chr1	179458472	3.85664	0.0162158	0.00019579	0.0322717
cg15995695	1	179334675	AXDND1	rs12403933	chr1	179423620	3.85664	0.0162158	0.00019579	0.0322717
cg15995695	1	179334675	AXDND1	rs4363399:179441043:T:C	chr1	179441043	3.85664	0.0162158	0.00019579	0.0322717
cg15995695	1	179334675	AXDND1	rs10913809:179485634:A:G	chr1	179485634	3.85664	0.0162158	0.00019579	0.0322717
cg15995695	1	179334675	AXDND1	rs4651036:179444575:T:C	chr1	179444575	3.85664	0.0162158	0.00019579	0.0322717
cg15995695	1	179334675	AXDND1	rs61827665:179465674:A:G	chr1	179465674	3.85664	0.0162158	0.00019579	0.0322717
cg15995695	1	179334675	AXDND1	rs71630227:179461447:T:A	chr1	179461447	3.85664	0.0162158	0.00019579	0.0322717
cg15995695	1	179334675	AXDND1	rs36039316	chr1	179435899	3.85664	0.0162158	0.00019579	0.0322717
cg00252781	1	179334658	AXDND1	rs34227848:179419689:T:A	chr1	179419689	3.85652	0.0165458	0.00019587	0.0322821
cg00252781	1	179334658	AXDND1	rs4651028:179407523:A:G	chr1	179407523	3.85603	0.0165262	0.00019621	0.0323264
cg13696752	9	4662858	SPATA6L	rs12339951:4674465:G:A	chr9	4674465	3.85568	0.0150652	0.00019646	0.0323595
cg13696752	9	4662858	SPATA6L	rs12349333:4674467:C:G	chr9	4674467	3.85568	0.0150652	0.00019646	0.0323595
cg14377594	9	1051505	DMRT2	rs12002058:1048945:C:T	chr9	1048945	-3.85511	-0.0226013	0.00019687	0.0324112
cg18920858	17	64617748	PRKCA	rs72837199:64249880:G:A	chr17	64249880	3.85498	0.0137315	0.00019696	0.032423
cg00252781	1	179334658	AXDND1	rs12750591:179420095:C:G	chr1	179420095	3.85442	0.0165408	0.00019735	0.0324736
cg15995695	1	179334675	AXDND1	rs12402619:179664507:C:T	chr1	179664507	-3.8544	-0.0180235	0.00019737	0.0324755
cg00252781	1	179334658	AXDND1	rs12749554:179420112:G:C	chr1	179420112	3.85434	0.0165406	0.00019741	0.0324812
cg11028201	4	41867562	NA	rs10938180:42193924:A:G	chr4	42193924	-3.85261	-0.0247701	0.00019864	0.0326393
cg06470822	6	28175283	NA	rs12332927	chr6	27955115	-3.8515	-0.0169778	0.00019944	0.0327394
cg06470822	6	28175283	NA	rs9461424:27919401:G:A	chr6	27919401	-3.8515	-0.0169778	0.00019944	0.0327394
cg06470822	6	28175283	NA	rs9461425	chr6	27919688	-3.8515	-0.0169778	0.00019944	0.0327394
cg06470822	6	28175283	NA	rs140383952:27896148:T:C	chr6	27896148	-3.8515	-0.0169778	0.00019944	0.0327394
cg08715231	8	25906064	NA	rs11135915:25911467:A:G	chr8	25911467	3.84907	0.0113775	0.00020118	0.032963
cg15995695	1	179334675	AXDND1	rs12404170:179423552:T:C	chr1	179423552	3.84821	0.0162053	0.0002018	0.0330433
cg04801402	6	46138912	ENPP5	rs6900403:46085866:T:C	chr6	46085866	-3.84731	-0.0084374	0.00020245	0.0331272
cg15995695	1	179334675	AXDND1	rs4652418	chr1	179561645	-3.84642	-0.0150973	0.0002031	0.0332104
cg23779890	8	75262522	GDAP1	rs148651678:75286280:A:G	chr8	75286280	-3.84639	-0.0136671	0.00020312	0.033213
cg26112929	7	5821500	RNF216	rs852452:5670341:C:T	chr7	5670341	-3.84579	-0.0087785	0.00020356	0.0332691
cg02225085	5	87975992	LINC00461	rs2081846:88222739:T:C	chr5	88222739	-3.84569	-0.0145969	0.00020363	0.0332784
cg15995695	1	179334675	AXDND1	rs1410589:179518260:A:G	chr1	179518260	3.84551	0.0154235	0.00020376	0.0332954
cg02225085	5	87975992	LINC00461	rs67377929:88208146:T:C	chr5	88208146	3.84415	0.0153695	0.00020476	0.0334209
cg08715231	8	25906064	NA	rs6997996	chr8	25891653	3.84064	0.0111775	0.00020735	0.0337488
cg00252781	1	179334658	AXDND1	rs12730594:179421562:G:A	chr1	179421562	3.83924	0.0165025	0.00020839	0.0338777
cg00252781	1	179334658	AXDND1	rs12732094:179421747:C:T	chr1	179421747	3.83747	0.0164983	0.00020972	0.0340459
cg03876032	10	26501065	MYO3A	rs7903913:26181593:T:G	chr10	26181593	-3.83696	-0.0166054	0.0002101	0.034095
cg04801402	6	46138912	ENPP5	rs6921636	chr6	46080356	-3.83473	-0.0084384	0.00021179	0.0343111
cg15995695	1	179334675	AXDND1	rs61826364:179522227:A:G	chr1	179522227	3.83287	0.0153013	0.0002132	0.0344908
cg15995695	1	179334675	AXDND1	rs61826365:179522340:C:G	chr1	179522340	3.83282	0.0153008	0.00021324	0.0344956
cg15995695	1	179334675	AXDND1	rs35427395:179522860:T:G	chr1	179522860	3.83241	0.0152972	0.00021355	0.0345353
cg15995695	1	179334675	AXDND1	rs12760325:179523041:T:C	chr1	179523041	3.83231	0.0152963	0.00021363	0.0345454
cg15995695	1	179334675	AXDND1	rs12736279:179523000:C:T	chr1	179523000	3.83231	0.0152963	0.00021363	0.0345454
cg11028201	4	41867562	NA	rs1983138	chr4	41901368	3.83226	0.0223714	0.00021366	0.0345498
cg04809453	16	1030383	SOX8	rs373260527:1010610:A:G	chr16	1010610	3.83177	0.0389677	0.00021403	0.034598
cg15995695	1	179334675	AXDND1	rs12734521:179394948:T:G	chr1	179394948	3.83143	0.0157659	0.0002143	0.0346326
cg15995695	1	179334675	AXDND1	rs1328598:179524509:T:C	chr1	179524509	3.83127	0.015287	0.00021442	0.0346484
cg15995695	1	179334675	AXDND1	rs1328597:179524475:G:A	chr1	179524475	3.83127	0.015287	0.00021442	0.0346484
cg26112929	7	5821500	RNF216	rs852400:5718477:A:C	chr7	5718477	-3.83117	-0.008835	0.00021449	0.0346578
cg03876032	10	26501065	MYO3A	rs7086207:26187677:T:G	chr10	26187677	-3.83102	-0.0169784	0.00021461	0.0346718
cg15995695	1	179334675	AXDND1	rs17278686:179524964:A:G	chr1	179524964	3.83095	0.0152842	0.00021467	0.0346787
cg15995695	1	179334675	AXDND1	rs17278693:179525124:T:C	chr1	179525124	3.83079	0.0152828	0.00021479	0.0346947
cg15995695	1	179334675	AXDND1	rs35726184:179525300:A:G	chr1	179525300	3.83068	0.0152818	0.00021487	0.0347051
cg07758738	18	12911528	NA	rs8089696:12903976:T:C	chr18	12903976	-3.83004	-0.0286933	0.00021536	0.0347667
cg01141812	6	123317124	CLVS2	rs72962728	chr6	123408632	-3.82696	-0.01423	0.00021775	0.0350707
cg16386080	9	90589146	CDK20	rs10118969:90619127:T:C	chr9	90619127	-3.82669	-0.0092795	0.00021796	0.0350965
cg16386080	9	90589146	CDK20	rs10121892:90619338:A:G	chr9	90619338	-3.82635	-0.0092772	0.00021822	0.0351313
cg15995695	1	179334675	AXDND1	rs12122719:179667266:C:G	chr1	179667266	-3.82555	-0.017869	0.00021885	0.0352107
cg09834794	3	147087702	NA	rs72615614	chr3	147581183	-3.82543	-0.0256494	0.00021895	0.0352215
cg03876032	10	26501065	MYO3A	rs1339803:26205685:C:T	chr10	26205685	-3.82268	-0.0163394	0.0002211	0.0354908
cg13154880	4	48486472	SLC10A4	rs74929644:48492769:A:T	chr4	48492769	3.82265	0.0116181	0.00022113	0.0354939
cg06470822	6	28175283	NA	rs9368530:27737605:A:G	chr6	27737605	-3.82078	-0.0114453	0.00022261	0.0356767
cg16386080	9	90589146	CDK20	rs7861908:90617300:T:C	chr9	90617300	-3.81975	-0.009447	0.00022342	0.0357782
cg16386080	9	90589146	CDK20	rs11787593:90616889:C:T	chr9	90616889	-3.81945	-0.0094387	0.00022366	0.0358079
cg16386080	9	90589146	CDK20	rs6560049:90616332:C:G	chr9	90616332	-3.81854	-0.0094353	0.0002244	0.0358981
cg15995695	1	179334675	AXDND1	rs61826369:179527532:T:C	chr1	179527532	3.81837	0.0151762	0.00022453	0.0359136
cg00252781	1	179334658	AXDND1	rs12732109:179421779:C:T	chr1	179421779	3.81802	0.0164907	0.00022481	0.0359509
cg00252781	1	179334658	AXDND1	rs12752034:179421788:A:G	chr1	179421788	3.81792	0.0164904	0.00022489	0.0359604
cg00252781	1	179334658	AXDND1	rs12758559:179370450:A:G	chr1	179370450	3.81769	0.0165475	0.00022508	0.0359827
cg00252781	1	179334658	AXDND1	rs12758573:179370473:A:C	chr1	179370473	3.81769	0.0165475	0.00022508	0.0359827
cg00252781	1	179334658	AXDND1	rs12724320:179370499:T:C	chr1	179370499	3.81769	0.0165475	0.00022508	0.0359827
cg15995695	1	179334675	AXDND1	rs61826370:179527613:A:G	chr1	179527613	3.8167	0.0151622	0.00022587	0.0360806
cg02225085	5	87975992	LINC00461	rs304162:88156970:C:T	chr5	88156970	-3.81655	-0.0205274	0.000226	0.0360961
cg03876032	10	26501065	MYO3A	rs201425423	chr10	26204167	3.81584	0.0161699	0.00022656	0.0361664
cg01930746	2	10950511	PDIA6	rs1686475	chr2	10981972	3.81279	0.0163895	0.00022904	0.0364734
cg15995695	1	179334675	AXDND1	rs115983832:179540386:A:G	chr1	179540386	3.81149	0.0147666	0.0002301	0.0366077
cg13154880	4	48486472	SLC10A4	rs6447640:48483416:A:G	chr4	48483416	-3.81134	-0.0116798	0.00023023	0.0366235
cg13154880	4	48486472	SLC10A4	rs6829716:48487814:A:C	chr4	48487814	-3.81102	-0.0116791	0.00023049	0.0366552
cg13154880	4	48486472	SLC10A4	rs6829144:48489769:G:A	chr4	48489769	-3.81088	-0.0116788	0.00023061	0.0366685
cg08084860	2	237080340	NA	rs1710828:236657256:A:G	chr2	236657256	3.81037	0.0122357	0.00023103	0.0367203
cg02225085	5	87975992	LINC00461	rs7730255:88158146:G:C	chr5	88158146	-3.81032	-0.0140839	0.00023107	0.0367246
cg13154880	4	48486472	SLC10A4	rs9884546	chr4	48566634	-3.80977	-0.0122929	0.00023153	0.0367823
cg13154880	4	48486472	SLC10A4	rs7654770:48489267:T:C	chr4	48489267	-3.80973	-0.011676	0.00023155	0.036786
cg15995695	1	179334675	AXDND1	rs35867532:179527978:G:A	chr1	179527978	3.80874	0.0150963	0.00023237	0.0368884
cg13645908	17	714733	NXN	rs9894958	chr17	733738	-3.80837	-0.0065994	0.00023268	0.0369259
cg16386080	9	90589146	CDK20	rs585004:90622405:G:C	chr9	90622405	3.8081	0.00818677	0.0002329	0.0369524
cg13154880	4	48486472	SLC10A4	rs2945330:48606526:A:C	chr4	48606526	3.8055	0.0121253	0.00023507	0.0372215
cg08376141	6	32116591	PRRT1	rs522162	chr6	31919917	3.80489	0.0334609	0.00023558	0.0372843
cg08376141	6	32116591	PRRT1	rs547154	chr6	31910938	3.80489	0.0334609	0.00023558	0.0372843
cg08376141	6	32116591	PRRT1	rs386601491	chr6	31910162	3.80489	0.0334609	0.00023558	0.0372843
cg08376141	6	32116591	PRRT1	rs1042663	chr6	31905130	3.80489	0.0334609	0.00023558	0.0372843
cg08376141	6	32116591	PRRT1	rs654727:31906865:C:T	chr6	31906865	3.80489	0.0334609	0.00023558	0.0372843
cg08376141	6	32116591	PRRT1	rs760070:6:31919956:C:T	chr6	31919956	3.80489	0.0334609	0.00023558	0.0372843
cg08376141	6	32116591	PRRT1	rs7772063:31906334:T:A	chr6	31906334	3.80489	0.0334609	0.00023558	0.0372843
cg08376141	6	32116591	PRRT1	rs7754520:31906505:C:T	chr6	31906505	3.80489	0.0334609	0.00023558	0.0372843
cg08376141	6	32116591	PRRT1	rs2507953	chr6	31905328	3.80489	0.0334609	0.00023558	0.0372843
cg08376141	6	32116591	PRRT1	rs403569	chr6	31924880	3.80489	0.0334609	0.00023558	0.0372843
cg08376141	6	32116591	PRRT1	rs1265906:31923997:C:T	chr6	31923997	3.80489	0.0334609	0.00023558	0.0372843
cg08376141	6	32116591	PRRT1	rs653414	chr6	31907168	3.80489	0.0334609	0.00023558	0.0372843
cg08376141	6	32116591	PRRT1	rs497239:31908761:T:C	chr6	31908761	3.80489	0.0334609	0.00023558	0.0372843
cg08376141	6	32116591	PRRT1	rs550605	chr6	31907147	3.80489	0.0334609	0.00023558	0.0372843
cg08376141	6	32116591	PRRT1	rs541862	chr6	31916951	3.80489	0.0334609	0.00023558	0.0372843
cg08376141	6	32116591	PRRT1	rs550513	chr6	31920687	3.80489	0.0334609	0.00023558	0.0372843
cg08376141	6	32116591	PRRT1	rs438999	chr6	31928306	3.80489	0.0334609	0.00023558	0.0372843
cg08376141	6	32116591	PRRT1	rs2242572:6:31910929:A:G	chr6	31910929	3.80489	0.0334609	0.00023558	0.0372843
cg08084860	2	237080340	NA	rs1018313:236645015:C:G	chr2	236645015	3.8032	0.0122118	0.000237	0.0374583
cg08084860	2	237080340	NA	rs2696398	chr2	236655152	3.80316	0.0122109	0.00023703	0.0374623
cg08084860	2	237080340	NA	rs7588989:236642421:A:G	chr2	236642421	3.80316	0.0122109	0.00023703	0.0374623
cg15995695	1	179334675	AXDND1	rs12736545:179523150:C:T	chr1	179523150	3.80242	0.0152725	0.00023766	0.0375392
cg14361627	7	130419116	KLF14	rs1025106:130911382:T:C	chr7	130911382	-3.80199	-0.0197765	0.00023803	0.0375835
cg23779890	8	75262522	GDAP1	rs72665412	chr8	75252734	-3.8017	-0.0134371	0.00023827	0.0376133
cg00603274	11	61596626	FADS2	rs174453:61645967:C:G	chr11	61645967	3.80035	0.0115198	0.00023941	0.0377535
cg23779890	8	75262522	GDAP1	rs77169976:75517783:G:C	chr8	75517783	-3.79983	-0.0200657	0.00023986	0.0378085
cg03876032	10	26501065	MYO3A	rs10828899	chr10	26186577	-3.79954	-0.016502	0.0002401	0.0378387
cg03876032	10	26501065	MYO3A	rs12258431:26181223:G:A	chr10	26181223	-3.79889	-0.0164999	0.00024066	0.0379088
cg06470822	6	28175283	NA	rs4713120	chr6	27721835	-3.79798	-0.0098502	0.00024144	0.0380038
cg02799448	6	137817008	OLIG3	rs17066054:137420820:G:C	chr6	137420820	-3.79696	-0.0067806	0.00024232	0.0381091
cg02799448	6	137817008	OLIG3	rs72975662:137440163:T:C	chr6	137440163	-3.79696	-0.0067806	0.00024232	0.0381091
cg02799448	6	137817008	OLIG3	rs10484797	chr6	137443682	-3.79696	-0.0067806	0.00024232	0.0381091
cg02799448	6	137817008	OLIG3	rs72975655:137439135:G:A	chr6	137439135	-3.79696	-0.0067806	0.00024232	0.0381091
cg02799448	6	137817008	OLIG3	rs72975667	chr6	137441364	-3.79696	-0.0067806	0.00024232	0.0381091
cg02799448	6	137817008	OLIG3	rs147194314:137435784:G:A	chr6	137435784	-3.79696	-0.0067806	0.00024232	0.0381091
cg02799448	6	137817008	OLIG3	rs72975626	chr6	137426433	-3.79696	-0.0067806	0.00024232	0.0381091
cg02799448	6	137817008	OLIG3	rs72975666:137441341:A:G	chr6	137441341	-3.79696	-0.0067806	0.00024232	0.0381091
cg02799448	6	137817008	OLIG3	rs111954804:137447690:C:T	chr6	137447690	-3.79678	-0.0067804	0.00024248	0.0381285
cg13154880	4	48486472	SLC10A4	rs7657698:48765175:G:A	chr4	48765175	3.79562	0.012093	0.00024348	0.0382479
cg04809453	16	1030383	SOX8	rs12920302:954868:G:T	chr16	954868	-3.79517	-0.0256447	0.00024386	0.0382858
cg02799448	6	137817008	OLIG3	rs72975688:137450647:C:T	chr6	137450647	-3.7951	-0.006779	0.00024393	0.0382931
cg02799448	6	137817008	OLIG3	rs72975684:137450542:G:T	chr6	137450542	-3.7951	-0.006779	0.00024393	0.0382931
cg13154880	4	48486472	SLC10A4	rs1712768:48606096:C:T	chr4	48606096	3.79507	0.0120996	0.00024395	0.038296
cg13154880	4	48486472	SLC10A4	rs4695397:48712506:C:A	chr4	48712506	3.79502	0.0120933	0.00024399	0.0383006
cg13154880	4	48486472	SLC10A4	rs6830848:48690408:G:T	chr4	48690408	3.79502	0.0120933	0.00024399	0.0383006
cg13154880	4	48486472	SLC10A4	rs4447830:48717258:C:A	chr4	48717258	3.79502	0.0120933	0.00024399	0.0383006
cg13154880	4	48486472	SLC10A4	rs62309747:48713862:G:A	chr4	48713862	3.79502	0.0120933	0.00024399	0.0383006
cg13154880	4	48486472	SLC10A4	rs1980193:48758963:T:C	chr4	48758963	3.79413	0.0120894	0.00024477	0.0383964
cg13154880	4	48486472	SLC10A4	rs34635008:48576908:T:C	chr4	48576908	3.79372	0.0120885	0.00024512	0.0384402
cg13154880	4	48486472	SLC10A4	rs937888	chr4	48543896	3.79371	0.0120884	0.00024513	0.0384413
cg13154880	4	48486472	SLC10A4	rs17656040	chr4	48546448	3.79371	0.0120884	0.00024513	0.0384413
cg13154880	4	48486472	SLC10A4	rs6855022	chr4	48533148	3.79371	0.0120884	0.00024513	0.0384413
cg13154880	4	48486472	SLC10A4	rs12645501:48506163:T:A	chr4	48506163	3.79371	0.0120884	0.00024513	0.0384413
cg13154880	4	48486472	SLC10A4	rs4536901	chr4	48562340	3.79371	0.0120884	0.00024513	0.0384413
cg13154880	4	48486472	SLC10A4	rs1712772:48626639:A:T	chr4	48626639	3.79371	0.0120884	0.00024513	0.0384413
cg13154880	4	48486472	SLC10A4	rs11939889:48758219:C:T	chr4	48758219	3.79371	0.0120884	0.00024513	0.0384413
cg13154880	4	48486472	SLC10A4	rs59686413	chr4	48560383	3.79371	0.0120884	0.00024513	0.0384413
cg13154880	4	48486472	SLC10A4	rs776591:48589419:T:C	chr4	48589419	3.79371	0.0120884	0.00024513	0.0384413
cg13154880	4	48486472	SLC10A4	rs13119414:48772105:C:A	chr4	48772105	-3.79371	-0.0120884	0.00024513	0.0384413
cg13154880	4	48486472	SLC10A4	rs6811148	chr4	48516135	3.79371	0.0120884	0.00024513	0.0384413
cg13154880	4	48486472	SLC10A4	rs776590:48591150:T:G	chr4	48591150	3.79371	0.0120884	0.00024513	0.0384413
cg13154880	4	48486472	SLC10A4	rs4695391	chr4	48582909	3.79371	0.0120884	0.00024513	0.0384413
cg13154880	4	48486472	SLC10A4	rs776601:48612596:T:C	chr4	48612596	3.79371	0.0120884	0.00024513	0.0384413
cg13154880	4	48486472	SLC10A4	rs17656094	chr4	48561799	3.79371	0.0120884	0.00024513	0.0384413
cg13154880	4	48486472	SLC10A4	rs6447660:48772680:G:C	chr4	48772680	-3.79371	-0.0120884	0.00024513	0.0384413
cg13154880	4	48486472	SLC10A4	rs12506098:48594659:G:A	chr4	48594659	3.79371	0.0120884	0.00024513	0.0384413
cg13154880	4	48486472	SLC10A4	rs7657332:48778152:T:C	chr4	48778152	3.79371	0.0120884	0.00024513	0.0384413
cg13154880	4	48486472	SLC10A4	rs62311306:48561724:A:G	chr4	48561724	3.79371	0.0120884	0.00024513	0.0384413
cg13154880	4	48486472	SLC10A4	rs57797824:48777317:T:C	chr4	48777317	3.79371	0.0120884	0.00024513	0.0384413
cg13154880	4	48486472	SLC10A4	rs6831857	chr4	48527213	-3.79371	-0.0120884	0.00024513	0.0384413
cg13154880	4	48486472	SLC10A4	rs17656076:48560805:G:C	chr4	48560805	3.79371	0.0120884	0.00024513	0.0384413
cg13154880	4	48486472	SLC10A4	rs2176460:48770306:A:C	chr4	48770306	3.79371	0.0120884	0.00024513	0.0384413
cg13154880	4	48486472	SLC10A4	rs6853588:48781518:C:G	chr4	48781518	3.79363	0.0120881	0.00024521	0.0384504
cg13154880	4	48486472	SLC10A4	rs7697522:48739373:C:T	chr4	48739373	3.79359	0.0120879	0.00024524	0.0384539
cg13154880	4	48486472	SLC10A4	rs4695400:48742680:G:A	chr4	48742680	3.79359	0.0120879	0.00024524	0.0384539
cg13154880	4	48486472	SLC10A4	rs11943219:48743624:G:A	chr4	48743624	3.79359	0.0120879	0.00024524	0.0384539
cg13154880	4	48486472	SLC10A4	rs4695401:48742730:T:C	chr4	48742730	3.79359	0.0120879	0.00024524	0.0384539
cg13154880	4	48486472	SLC10A4	rs1507865:48573028:T:C	chr4	48573028	3.7935	0.0120886	0.00024532	0.0384627
cg13154880	4	48486472	SLC10A4	rs7681070:48731980:C:T	chr4	48731980	3.79348	0.0120874	0.00024534	0.0384649
cg13154880	4	48486472	SLC10A4	rs2940324:48634259:G:A	chr4	48634259	3.79348	0.0120874	0.00024534	0.0384649
cg13154880	4	48486472	SLC10A4	rs6447655:48729252:G:A	chr4	48729252	3.79348	0.0120874	0.00024534	0.0384649
cg13154880	4	48486472	SLC10A4	rs796555:48636595:C:T	chr4	48636595	3.79348	0.0120874	0.00024534	0.0384649
cg13154880	4	48486472	SLC10A4	rs28733443:48678387:G:T	chr4	48678387	3.79348	0.0120874	0.00024534	0.0384649
cg13154880	4	48486472	SLC10A4	rs7680280:48731592:C:T	chr4	48731592	3.79348	0.0120874	0.00024534	0.0384649
cg13154880	4	48486472	SLC10A4	rs937889:48649262:C:T	chr4	48649262	3.79348	0.0120874	0.00024534	0.0384649
cg13154880	4	48486472	SLC10A4	rs776588:48672495:T:A	chr4	48672495	3.79348	0.0120874	0.00024534	0.0384649
cg13154880	4	48486472	SLC10A4	rs78306719:48734168:C:T	chr4	48734168	3.79348	0.0120874	0.00024534	0.0384649
cg13154880	4	48486472	SLC10A4	rs1712767:48663375:G:A	chr4	48663375	3.79348	0.0120874	0.00024534	0.0384649
cg13154880	4	48486472	SLC10A4	rs9790336:48725187:T:G	chr4	48725187	3.79348	0.0120874	0.00024534	0.0384649
cg13154880	4	48486472	SLC10A4	rs1702798:48663831:C:T	chr4	48663831	3.79348	0.0120874	0.00024534	0.0384649
cg06644373	2	200321348	SATB2	rs62180463:200816597:G:A	chr2	200816597	-3.79296	-0.0325237	0.00024579	0.038519
cg23779890	8	75262522	GDAP1	rs10106137:75527633:C:A	chr8	75527633	-3.79257	-0.0200287	0.00024613	0.0385582
cg13696752	9	4662858	SPATA6L	rs3758245	chr9	4679078	3.79249	0.0211824	0.0002462	0.0385674
cg26726141	17	64612159	PRKCA	rs228885	chr17	64443372	-3.7921	-0.0163158	0.00024654	0.0386106
cg06470822	6	28175283	NA	rs200477:27769705:G:A	chr6	27769705	-3.79008	-0.0102989	0.00024832	0.0388103
cg13154880	4	48486472	SLC10A4	rs76540949:48527209:T:C	chr4	48527209	3.7897	0.0120781	0.00024865	0.0388491
cg11730703	14	105167607	INF2	rs73345596:105175387:C:T	chr14	105175387	-3.78928	-0.0099046	0.00024902	0.0388944
cg13154880	4	48486472	SLC10A4	rs3107022:48617387:C:T	chr4	48617387	3.78552	0.012078	0.00025237	0.0392982
cg13154880	4	48486472	SLC10A4	rs6830078:48790336:C:T	chr4	48790336	-3.7844	-0.0122232	0.00025337	0.0394207
cg15995695	1	179334675	AXDND1	rs12401708:179528917:G:A	chr1	179528917	3.78429	0.0148996	0.00025347	0.039433
cg15995695	1	179334675	AXDND1	rs11590702:179532298:G:A	chr1	179532298	3.78361	0.0148942	0.00025409	0.039501
cg15995695	1	179334675	AXDND1	rs17278707	chr1	179530141	3.78361	0.0148942	0.00025409	0.039501
cg15995695	1	179334675	AXDND1	rs12401711	chr1	179528942	3.78361	0.0148942	0.00025409	0.039501
cg15995695	1	179334675	AXDND1	rs12741678:179531807:T:C	chr1	179531807	3.78361	0.0148942	0.00025409	0.039501
cg03876032	10	26501065	MYO3A	rs12764282:26192104:C:G	chr10	26192104	-3.78342	-0.0161435	0.00025425	0.039521
cg16386080	9	90589146	CDK20	rs11793481:90629142:T:C	chr9	90629142	-3.78239	-0.0093519	0.00025519	0.0396338
cg13645908	17	714733	NXN	rs6565719:215798:C:A	chr17	215798	3.78085	0.00583833	0.00025658	0.0398024
cg04809453	16	1030383	SOX8	rs4984980:968292:G:A	chr16	968292	-3.7799	-0.0258626	0.00025744	0.0399053
cg04809453	16	1030383	SOX8	rs12920310:954872:G:C	chr16	954872	-3.77945	-0.0254803	0.00025785	0.0399538
cg08715231	8	25906064	NA	rs980724:25918732:G:C	chr8	25918732	-3.77919	-0.0103034	0.00025809	0.0399824
cg05700079	3	147126961	ZIC1	rs1876077:147359617:T:C	chr3	147359617	3.77772	0.0159325	0.00025944	0.0401448
cg00425710	16	56672671	MT1A	rs1827211:56668256:C:T	chr16	56668256	3.77693	0.0161201	0.00026017	0.0402316
cg00425710	16	56672671	MT1A	rs1827208:56666886:C:T	chr16	56666886	3.77676	0.0161193	0.00026033	0.0402507
cg09477019	16	56681945	NA	rs11648284:56684406:A:C	chr16	56684406	-3.77564	-0.0211973	0.00026136	0.0403746
cg16386080	9	90589146	CDK20	rs12553922	chr9	90640761	-3.77353	-0.009314	0.00026332	0.0406051
cg16386080	9	90589146	CDK20	rs58048411:90641788:T:A	chr9	90641788	-3.77353	-0.009314	0.00026332	0.0406051
cg16386080	9	90589146	CDK20	rs62576817:90634566:G:C	chr9	90634566	-3.77353	-0.009314	0.00026332	0.0406051
cg16386080	9	90589146	CDK20	rs62576821:90643829:C:T	chr9	90643829	-3.77353	-0.009314	0.00026332	0.0406051
cg16386080	9	90589146	CDK20	rs12351691:90631130:T:C	chr9	90631130	-3.77353	-0.009314	0.00026332	0.0406051
cg00425710	16	56672671	MT1A	rs4094215:56670226:C:A	chr16	56670226	3.77205	0.0161595	0.00026471	0.0407719
cg08376141	6	32116591	PRRT1	rs641153:31914180:G:A	chr6	31914180	3.77188	0.0334722	0.00026486	0.0407899
cg16969368	17	57642752	DHX40	rs59950371	chr17	58125948	3.77098	0.0199641	0.00026571	0.04089
cg00425710	16	56672671	MT1A	rs4784701:56670667:T:G	chr16	56670667	3.76742	0.0161507	0.00026907	0.041289
cg04809453	16	1030383	SOX8	rs57719803:1483769:C:G	chr16	1483769	-3.76512	-0.0236327	0.00027127	0.0415487
cg02225085	5	87975992	LINC00461	rs76768696:88159966:T:G	chr5	88159966	-3.76482	-0.0149213	0.00027156	0.0415834
cg04801402	6	46138912	ENPP5	rs1076738:46096883:T:C	chr6	46096883	-3.76434	-0.0080225	0.00027202	0.0416374
cg00425710	16	56672671	MT1A	16:56654123:T:A	chr16	56654123	-3.76354	-0.0176313	0.00027279	0.0417289
cg00425710	16	56672671	MT1A	rs75871429:56654124:C:A	chr16	56654124	-3.76354	-0.0176313	0.00027279	0.0417289
cg04304705	22	48884960	FAM19A5	rs2337489:49078501:G:C	chr22	49078501	-3.76351	-0.017287	0.00027282	0.0417328
cg13154880	4	48486472	SLC10A4	rs79858408:48493237:G:A	chr4	48493237	3.76346	0.01161	0.00027287	0.0417383
cg26112929	7	5821500	RNF216	rs73064662:5788162:C:G	chr7	5788162	3.76302	0.00851675	0.0002733	0.0417901
cg15995695	1	179334675	AXDND1	rs35599523:179611621:G:A	chr1	179611621	3.76257	0.015805	0.00027373	0.041839
cg04801402	6	46138912	ENPP5	rs111698118:46091639:G:A	chr6	46091639	-3.75669	-0.0080935	0.00027947	0.0425136
cg13696752	9	4662858	SPATA6L	rs28720983:4676871:T:C	chr9	4676871	3.75633	0.0147247	0.00027982	0.0425553
cg05419198	8	145753896	C8orf82	rs4333644:145844039:C:T	chr8	145844039	-3.75175	-0.0153934	0.00028438	0.0430916
cg03876032	10	26501065	MYO3A	rs3006759:26646504:C:T	chr10	26646504	-3.75051	-0.0149568	0.00028563	0.043235
cg03876032	10	26501065	MYO3A	rs3006757:26645149:C:A	chr10	26645149	-3.75051	-0.0149568	0.00028563	0.043235
cg15995695	1	179334675	AXDND1	rs140180172:179536206:A:G	chr1	179536206	3.75006	0.014814	0.00028608	0.043288
cg06470822	6	28175283	NA	rs2056924	chr6	27690174	-3.74862	-0.0095601	0.00028754	0.0434556
cg06470822	6	28175283	NA	rs9468213:27706180:G:A	chr6	27706180	-3.74862	-0.0095601	0.00028754	0.0434556
cg16386080	9	90589146	CDK20	rs12551645:90645065:T:G	chr9	90645065	-3.74755	-0.009266	0.00028863	0.0435833
cg00425710	16	56672671	MT1A	rs1827213	chr16	56671841	3.74748	0.0160706	0.00028869	0.0435914
cg14535884	9	117349621	ATP6V1G1	rs10982326:117364533:C:A	chr9	117364533	-3.7469	-0.0337426	0.00028929	0.0436593
cg14535884	9	117349621	ATP6V1G1	rs10982327:117364535:T:A	chr9	117364535	-3.7469	-0.0337426	0.00028929	0.0436593
cg06470822	6	28175283	NA	rs9461407:27745738:G:A	chr6	27745738	-3.74391	-0.011315	0.00029235	0.0440201
cg11730703	14	105167607	INF2	rs4983382:105189504:G:A	chr14	105189504	3.74302	0.00813112	0.00029327	0.0441256
cg15995695	1	179334675	AXDND1	rs143835368:179536975:T:C	chr1	179536975	3.74217	0.0147944	0.00029415	0.0442272
cg15995695	1	179334675	AXDND1	rs151304286:179537060:C:T	chr1	179537060	3.74129	0.0147922	0.00029506	0.0443334
cg09817427	6	85474313	TBX18	rs215938:85465980:T:C	chr6	85465980	-3.741	-0.0084035	0.00029536	0.0443679
cg09817427	6	85474313	TBX18	rs172562	chr6	85473758	-3.74091	-0.0084041	0.00029546	0.0443797
cg09817427	6	85474313	TBX18	rs215940:85467491:T:C	chr6	85467491	-3.74091	-0.0084041	0.00029546	0.0443797
cg00603274	11	61596626	FADS2	rs174634:61647387:G:C	chr11	61647387	-3.74032	-0.0097605	0.00029607	0.0444498
cg16386080	9	90589146	CDK20	rs7043934:90615890:A:G	chr9	90615890	-3.74026	-0.0092675	0.00029613	0.044457
cg00603274	11	61596626	FADS2	rs174603:61626206:G:A	chr11	61626206	3.74014	0.00876667	0.00029626	0.044471
cg26726141	17	64612159	PRKCA	rs9894564:64438184:C:T	chr17	64438184	-3.73994	-0.0161524	0.00029646	0.0444957
cg14901671	17	70589079	NA	rs62070129:70175247:C:T	chr17	70175247	3.73922	0.00826473	0.00029721	0.0445831
cg06306198	3	147128998	ZIC1	rs73004625:147095294:T:C	chr3	147095294	3.73911	0.0118237	0.00029733	0.044597
cg14535884	9	117349621	ATP6V1G1	rs13297637:117366501:T:C	chr9	117366501	-3.73893	-0.0337493	0.00029752	0.0446182
cg00603274	11	61596626	FADS2	rs174635:61647427:T:G	chr11	61647427	-3.73784	-0.0097554	0.00029866	0.0447473
cg16386080	9	90589146	CDK20	rs72752063	chr9	90600849	-3.73768	-0.0095911	0.00029883	0.0447664
cg00252781	1	179334658	AXDND1	rs12133018:179442368:T:C	chr1	179442368	3.73719	0.0158805	0.00029935	0.0448271
cg13645908	17	714733	NXN	rs28625014:733149:G:A	chr17	733149	-3.73694	-0.0058026	0.00029961	0.0448561
cg15995695	1	179334675	AXDND1	rs75255153:179537710:T:C	chr1	179537710	3.73482	0.0147759	0.00030186	0.0451164
cg15995695	1	179334675	AXDND1	rs148841063:179538017:G:A	chr1	179538017	3.73186	0.0147683	0.00030501	0.0454802
cg16969368	17	57642752	DHX40	rs78638044	chr17	57974476	3.73156	0.0272669	0.00030533	0.0455163
cg15995695	1	179334675	AXDND1	rs1988032:179538201:T:A	chr1	179538201	3.72979	0.014763	0.00030724	0.0457348
cg06470822	6	28175283	NA	rs149878	chr6	27878738	-3.72864	-0.0108597	0.00030848	0.0458779
cg03876032	10	26501065	MYO3A	rs8190612	chr10	26512375	-3.72679	-0.0217619	0.00031049	0.0461103
cg14577472	20	42295538	MYBL2	rs62206217:42622711:A:G	chr20	42622711	-3.72623	-0.0043257	0.00031111	0.0461797
cg16386080	9	90589146	CDK20	rs1716638:90624359:C:T	chr9	90624359	3.72565	0.0080843	0.00031174	0.0462533
cg16386080	9	90589146	CDK20	rs505257:90624112:A:G	chr9	90624112	3.72445	0.00808238	0.00031305	0.0464037
cg04801402	6	46138912	ENPP5	rs9395154	chr6	46076742	-3.72293	-0.0078066	0.00031472	0.0465935
cg16386080	9	90589146	CDK20	rs530833:90623616:C:A	chr9	90623616	3.72254	0.00807488	0.00031515	0.0466417
cg16386080	9	90589146	CDK20	rs600366:90623545:A:C	chr9	90623545	3.72223	0.00807363	0.0003155	0.0466812
cg26112929	7	5821500	RNF216	rs17186478:5812748:G:T	chr7	5812748	3.72112	0.00859711	0.00031673	0.0468225
cg15995695	1	179334675	AXDND1	rs11577571:179539235:A:G	chr1	179539235	3.71937	0.0147361	0.00031868	0.0470426
cg04304705	22	48884960	FAM19A5	rs80327921:48743012:C:A	chr22	48743012	3.71897	0.0245017	0.00031913	0.0470923
cg18400845	11	31837960	PAX6	rs35705753:32248801:G:T	chr11	32248801	-3.71851	-0.0080656	0.00031964	0.0471507
cg04801402	6	46138912	ENPP5	rs9472686:46074656:T:C	chr6	46074656	-3.71678	-0.0077909	0.00032158	0.0473676
cg06470822	6	28175283	NA	rs200494:27795237:T:G	chr6	27795237	-3.71506	-0.0129772	0.00032353	0.047586
cg15715853	3	150916446	GPR171	rs9835542:151218277:T:C	chr3	151218277	-3.71436	-0.0315606	0.00032433	0.0476721
cg04809453	16	1030383	SOX8	rs12597566:966051:A:C	chr16	966051	-3.71352	-0.0260933	0.00032528	0.0477791
cg27213509	2	176947228	EVX2	rs72918876	chr2	176561702	-3.71329	-0.0116922	0.00032554	0.0478085
cg06470822	6	28175283	NA	rs61471148:28037032:T:A	chr6	28037032	-3.71222	-0.0122585	0.00032677	0.0479455
cg07758738	18	12911528	NA	rs74977064:12914791:A:G	chr18	12914791	-3.70905	-0.0316784	0.00033042	0.0483564
cg00425710	16	56672671	MT1A	rs11648284:56684406:A:C	chr16	56684406	-3.70873	-0.0184766	0.00033078	0.0483938
cg03876032	10	26501065	MYO3A	rs2839675:26518418:C:T	chr10	26518418	-3.70823	-0.014585	0.00033136	0.0484578
cg16386080	9	90589146	CDK20	rs10868678:90625992:T:A	chr9	90625992	3.70684	0.00804096	0.00033297	0.0486402
cg16386080	9	90589146	CDK20	rs10868679:90625993:C:A	chr9	90625993	3.70674	0.00804077	0.0003331	0.048654
cg06470822	6	28175283	NA	rs2394002:27748015:G:A	chr6	27748015	-3.70279	-0.0111613	0.00033773	0.0491646
cg16386080	9	90589146	CDK20	rs11142037:90626288:G:A	chr9	90626288	3.70195	0.00802763	0.00033872	0.0492717
cg06470822	6	28175283	NA	rs9468223:27740666:C:T	chr6	27740666	-3.70051	-0.011141	0.00034043	0.0494639
cg05419198	8	145753896	C8orf82	rs13277542:145747920:T:G	chr8	145747920	-3.69746	-0.0149823	0.00034407	0.0498542
cg04809453	16	1030383	SOX8	rs4984838:1482007:T:G	chr16	1482007	3.69725	0.0229735	0.00034432	0.049882
cg16386080	9	90589146	CDK20	rs11142038:90626579:A:G	chr9	90626579	3.69652	0.00801337	0.00034521	0.0499802
Overlap with trans QTLs:
CpG_site	site.chr	site.pos	site.symbol	SNP	SNP.chr	SNP.pos	t-statistic	beta	pvalue	FDR
cg14305560	9	139487958	NA	rs71522383:13612593:C:T	chr8	13612593	6.72021	0.0193655	8.86e-10	0.00940395
cg14305560	9	139487958	NA	rs71522380:13596845:C:T	chr8	13596845	6.69506	0.0193527	1e-09	0.0100865
cg14305560	9	139487958	NA	rs11987200:13600729:C:T	chr8	13600729	6.69412	0.0193496	1e-09	0.0101003
cg14305560	9	139487958	NA	rs6989987	chr8	13599177	6.69412	0.0193496	1e-09	0.0101003
cg14305560	9	139487958	NA	rs35998932:13599343:T:C	chr8	13599343	6.69412	0.0193496	1e-09	0.0101003
cg14305560	9	139487958	NA	rs11991622:13600645:T:G	chr8	13600645	6.69412	0.0193496	1e-09	0.0101003
cg14305560	9	139487958	NA	rs11991625:13600672:T:G	chr8	13600672	6.69412	0.0193496	1e-09	0.0101003
cg14305560	9	139487958	NA	rs9942795:13608712:C:G	chr8	13608712	6.69412	0.0193496	1e-09	0.0101003
cg14305560	9	139487958	NA	rs78493387	chr8	13601978	6.69412	0.0193496	1e-09	0.0101003
cg14305560	9	139487958	NA	rs2128122:13605705:A:T	chr8	13605705	6.69412	0.0193496	1e-09	0.0101003
cg14305560	9	139487958	NA	rs9942798:13608976:C:T	chr8	13608976	6.69412	0.0193496	1e-09	0.0101003
cg14305560	9	139487958	NA	rs80329450:13607822:C:T	chr8	13607822	6.69412	0.0193496	1e-09	0.0101003
cg14305560	9	139487958	NA	rs13256272	chr8	13608309	6.69412	0.0193496	1e-09	0.0101003
cg14305560	9	139487958	NA	rs2128125:13605862:T:C	chr8	13605862	6.68994	0.0193481	1.03e-09	0.0102106
cg14305560	9	139487958	NA	rs13269763:13620179:T:C	chr8	13620179	6.5741	0.0186019	1.79e-09	0.0139767
cg14305560	9	139487958	NA	rs13269413:13620007:T:C	chr8	13620007	6.5741	0.0186019	1.79e-09	0.0139767
cg14305560	9	139487958	NA	rs71522384:13620625:A:G	chr8	13620625	6.57298	0.0185985	1.8e-09	0.0140115
cg14305560	9	139487958	NA	rs35396815:13614231:G:A	chr8	13614231	6.57298	0.0185985	1.8e-09	0.0140115
cg14305560	9	139487958	NA	rs13270147:13621496:G:C	chr8	13621496	6.57298	0.0185985	1.8e-09	0.0140115
cg14305560	9	139487958	NA	rs36027174:13614396:C:G	chr8	13614396	6.57298	0.0185985	1.8e-09	0.0140115
cg14305560	9	139487958	NA	rs35949421:13615899:C:G	chr8	13615899	6.57298	0.0185985	1.8e-09	0.0140115
cg14305560	9	139487958	NA	rs76395183:13622275:T:C	chr8	13622275	6.57258	0.0185966	1.8e-09	0.0140284
cg07079219	11	59323318	NA	rs67353536:7963279:A:C	chr9	7963279	-6.51893	-0.0223663	2.33e-09	0.0161163
cg07079219	11	59323318	NA	rs56128442	chr9	7973825	-6.49741	-0.0222097	2.58e-09	0.0170591
cg08310866	17	21281163	KCNJ12	20:61398961:A:G	chr20	61398961	-6.45587	-0.0472049	3.15e-09	0.0188194
cg08310866	17	21281163	KCNJ12	20:61398960:G:A	chr20	61398960	-6.45486	-0.0472019	3.17e-09	0.0188714
cg00479208	22	50656893	TUBGCP6	rs12261209	chr10	93389343	6.4449	0.0158701	3.32e-09	0.0193255
cg00479208	22	50656893	TUBGCP6	rs76212665:244546505:C:T	chr1	244546505	6.43022	0.017082	3.56e-09	0.020025
cg26726141	17	64612159	PRKCA	rs145473428:20200479:C:T	chr19	20200479	6.38931	0.0524886	4.32e-09	0.0221026
cg00479208	22	50656893	TUBGCP6	rs76677739:163204407:T:C	chr1	163204407	6.38663	0.016485	4.38e-09	0.0222261
cg00479208	22	50656893	TUBGCP6	rs75902891:163204129:A:G	chr1	163204129	6.38622	0.0164845	4.39e-09	0.0222478
cg00479208	22	50656893	TUBGCP6	rs74408370:163209829:C:G	chr1	163209829	6.38219	0.0164742	4.47e-09	0.0224579
cg00479208	22	50656893	TUBGCP6	rs16851616	chr1	163236401	6.38214	0.0164736	4.47e-09	0.0224593
cg00479208	22	50656893	TUBGCP6	rs16851566:163232649:T:C	chr1	163232649	6.38214	0.0164736	4.47e-09	0.0224593
cg00479208	22	50656893	TUBGCP6	rs75509665:163244334:G:A	chr1	163244334	6.38214	0.0164736	4.47e-09	0.0224593
cg00479208	22	50656893	TUBGCP6	rs76367598:163239323:G:A	chr1	163239323	6.38214	0.0164736	4.47e-09	0.0224593
cg00479208	22	50656893	TUBGCP6	rs112956411:163229070:T:C	chr1	163229070	6.38214	0.0164736	4.47e-09	0.0224593
cg00479208	22	50656893	TUBGCP6	rs78185572:163253070:G:C	chr1	163253070	6.38214	0.0164736	4.47e-09	0.0224593
cg00479208	22	50656893	TUBGCP6	rs2175013:163243073:C:A	chr1	163243073	6.38214	0.0164736	4.47e-09	0.0224593
cg10757065	2	223165891	CCDC140	rs72700904:10466253:C:T	chr9	10466253	-6.37486	-0.0172677	4.63e-09	0.0228405
cg07364220	18	55105880	ONECUT2	rs2781331:40192810:T:A	chr14	40192810	-6.3727	-0.028012	4.68e-09	0.0229451
cg00479208	22	50656893	TUBGCP6	rs150011668:111911027:T:C	chr4	111911027	6.3646	0.0169662	4.86e-09	0.0233931
cg10757065	2	223165891	CCDC140	rs72700906:10466326:C:A	chr9	10466326	-6.3622	-0.01723	4.92e-09	0.0235324
cg07364220	18	55105880	ONECUT2	rs984006:40189750:G:A	chr14	40189750	-6.36038	-0.0279058	4.96e-09	0.0236261
cg10757065	2	223165891	CCDC140	rs72700907:10466349:T:C	chr9	10466349	-6.36016	-0.017214	4.96e-09	0.023635
cg00479208	22	50656893	TUBGCP6	rs77422452:163241337:T:C	chr1	163241337	6.35292	0.0164304	5.14e-09	0.0240273
cg26726141	17	64612159	PRKCA	rs58559241:20198258:T:G	chr19	20198258	6.35025	0.052116	5.2e-09	0.0241614
cg04427498	7	20830657	NA	rs62517002:56116237:G:A	chr8	56116237	6.30669	0.0357713	6.39e-09	0.0266903
cg14305560	9	139487958	NA	rs35811013:13608106:A:G	chr8	13608106	6.29245	0.0180568	6.84e-09	0.0275967
cg00479208	22	50656893	TUBGCP6	rs8110090	chr19	41845872	6.24779	0.0149095	8.43e-09	0.0305732
cg18372607	11	31827084	PAX6	12:95084577:A:C	chr12	95084577	-6.24095	-0.0233618	8.71e-09	0.031034
cg04090392	15	83952774	BNC1	14:21792755:G:A	chr14	21792755	-6.23946	-0.042771	8.77e-09	0.0311308
cg07364220	18	55105880	ONECUT2	rs2781332:40192799:T:C	chr14	40192799	-6.2349	-0.0268268	8.96e-09	0.0314714
cg07364220	18	55105880	ONECUT2	rs2781327:40196403:A:G	chr14	40196403	-6.229	-0.0268296	9.21e-09	0.0319065
cg07364220	18	55105880	ONECUT2	rs2749503	chr14	40196257	-6.22712	-0.0268007	9.29e-09	0.0320454
cg07364220	18	55105880	ONECUT2	rs1953187	chr14	40190451	-6.22712	-0.0268007	9.29e-09	0.0320454
cg23740491	6	27228267	NA	rs1319845:4229916:A:G	chr3	4229916	6.21593	0.0263712	9.8e-09	0.0328153
cg23740491	6	27228267	NA	rs74396667:4220807:C:T	chr3	4220807	6.21592	0.0263718	9.8e-09	0.0328157
cg17592231	11	43604758	NA	rs1528137:16131260:C:T	chr7	16131260	-6.19974	-0.024685	1.06e-08	0.0339659
cg17592231	11	43604758	NA	rs1949953:16151706:A:G	chr7	16151706	-6.19973	-0.0246739	1.06e-08	0.0339666
cg17592231	11	43604758	NA	rs7781532:16142252:T:C	chr7	16142252	-6.19869	-0.0246792	1.06e-08	0.0340411
cg17592231	11	43604758	NA	rs7798339:16142246:A:G	chr7	16142246	-6.19869	-0.0246792	1.06e-08	0.0340411
cg17592231	11	43604758	NA	rs6461222:16145261:A:G	chr7	16145261	-6.19869	-0.0246792	1.06e-08	0.0340411
cg17592231	11	43604758	NA	rs1918860:16138994:A:G	chr7	16138994	-6.19869	-0.0246792	1.06e-08	0.0340411
cg17592231	11	43604758	NA	rs7781386:16142180:T:C	chr7	16142180	-6.19869	-0.0246792	1.06e-08	0.0340411
cg17592231	11	43604758	NA	rs2109370:16149347:C:T	chr7	16149347	-6.19858	-0.0246782	1.06e-08	0.034045
cg17592231	11	43604758	NA	rs1527202:16157447:C:G	chr7	16157447	-6.19858	-0.0246782	1.06e-08	0.034045
cg17592231	11	43604758	NA	rs4721472:16148081:G:A	chr7	16148081	-6.19858	-0.0246782	1.06e-08	0.034045
cg17592231	11	43604758	NA	rs2056420:16133271:G:A	chr7	16133271	-6.19858	-0.0246782	1.06e-08	0.034045
cg17592231	11	43604758	NA	rs6461223:16155335:C:T	chr7	16155335	-6.19858	-0.0246782	1.06e-08	0.034045
cg17592231	11	43604758	NA	rs6945873:16133148:G:A	chr7	16133148	-6.19858	-0.0246782	1.06e-08	0.034045
cg17592231	11	43604758	NA	rs1918859:16130332:C:A	chr7	16130332	-6.19858	-0.0246782	1.06e-08	0.034045
cg17592231	11	43604758	NA	rs2056419	chr7	16132939	-6.19858	-0.0246782	1.06e-08	0.034045
cg00479208	22	50656893	TUBGCP6	rs79473747:90208174:C:T	chr7	90208174	6.18364	0.0143807	1.14e-08	0.0352489
cg10757065	2	223165891	CCDC140	rs10959101:10427345:G:T	chr9	10427345	-6.17662	-0.0194981	1.18e-08	0.0357927
cg10757065	2	223165891	CCDC140	rs12340041:10423362:G:A	chr9	10423362	-6.17046	-0.0194272	1.21e-08	0.0362775
cg10757065	2	223165891	CCDC140	rs10959102:10427955:C:A	chr9	10427955	-6.17031	-0.0194299	1.21e-08	0.0362912
cg22995692	5	141263164	NA	rs9685449	chr4	6747880	6.1607	0.0401457	1.27e-08	0.0370596
cg18920858	17	64617748	PRKCA	rs60294829	chr3	193101703	6.15933	0.0187094	1.28e-08	0.0371802
cg14305560	9	139487958	NA	rs10917526:20056933:G:A	chr1	20056933	6.13929	0.0163368	1.4e-08	0.0388889
cg18920858	17	64617748	PRKCA	rs13083967:193102008:T:G	chr3	193102008	6.13546	0.0184443	1.43e-08	0.0392401
cg26726141	17	64612159	PRKCA	rs6928208:22191266:A:G	chr6	22191266	-6.1321	-0.0336732	1.45e-08	0.0395602
cg26726141	17	64612159	PRKCA	rs6927845:22191104:A:C	chr6	22191104	-6.1321	-0.0336732	1.45e-08	0.0395602
cg26726141	17	64612159	PRKCA	rs3734231:22191966:C:T	chr6	22191966	-6.13205	-0.0336615	1.45e-08	0.0395645
cg00479208	22	50656893	TUBGCP6	rs4077084	chr10	86420972	6.13205	0.0169946	1.45e-08	0.0395646
[truncated: 48 more rows]
