# Supplementary material for: DNA methylation perturbations may link altered development and aging in the lung
Source: Aging (Albany NY). 2021 Jan 19;13(2):1742–64. doi: 10.18632/aging.202544 (PMC7880367; doi:10.18632/aging.202544)
Supplement: Supplementary Table 5 [file aging-13-202544-s006.xlsx]

## Sheet: Sheet1
Supplementary Table 5. Differentially methylated regions (DMRs) between fetal with adult lung tissue datasets based on overlapping genes (878 regions at Stouffer's FDR<0.05, sorted by significance in fetal lung data). It should be noted that a lot of the overlapping genes (column A) for a particular region are repeated since their chromosomal coordinates are different between fetal lung (column F…
		Fetal Lung												Adult lung tissue
overlapping.genes	Gene1st	Chromosome	start	end	Coordinates	width	no.cpgs	min_smoothed_fdr	Stouffer	HMFDR	Fisher	maxdiff	meandiff	chromosome	start	end	Coordinates	width	no.cpgs	min_smoothed_fdr	Stouffer	HMFDR	Fisher	maxdiff	meandiff
ZIC1, SNORA81, SNORD66, SNORD2, ZIC4, Metazoa_SRP, SNORA18, U4	ZIC1	chr3	147122315	147132559	chr3_147122315_147132559	10245	63	2.0812e-297	1.57743e-102	1.01044e-21	5.30796e-225	0.0029323	0.000505996	chr3	147110667	147111660	chr3_147110667_147111660	994	5	3.25137e-13	0.00323723	0.0826527	0.0114497	0.00191445	0.00120905
SNORA73, SNORA64, SNORD75, SNORA74, snR65, 5S_rRNA, SCARNA6, SNORD39, SNORD18, SNORA36, SNORA75, SNORA48, SNORD56, SNORA43, SNORA1, Vault	SNORA73	chr2	43294942	43295753	chr2_43294942_43295753	812	6	4.36228e-250	1.71766e-100	2.41891e-23	2.749e-98	0.00481021	0.00329372	chr2	43020129	43020264	chr2_43020129_43020264	136	3	1.49848e-11	0.00652806	0.0156706	0.00886975	0.00177091	0.000805603
SNORA73, SNORA64, SNORD75, SNORA74, snR65, 5S_rRNA, SCARNA6, SNORD39, SNORD18, SNORA36, SNORA75, SNORA48, SNORD56, SNORA43, SNORA1, Vault	SNORA73	chr2	45175881	45180560	chr2_45175881_45180560	4680	21	1.47742e-252	4.01074e-82	6.62848e-23	9.3465e-145	0.0051684	0.0017719	chr2	43020129	43020264	chr2_43020129_43020264	136	3	1.49848e-11	0.00652806	0.0156706	0.00886975	0.00177091	0.000805603
SNORA69	SNORA69	chr17	45949677	45949878	chr17_45949677_45949878	202	5	1.00238e-174	1.88022e-69	2.26177e-21	2.15823e-70	0.00408826	0.00295518	chr17	35060451	35060679	chr17_35060451_35060679	229	3	8.90824e-13	1.33307e-05	1.28514e-05	4.089e-06	0.00216258	0.00141697
SNORA69	SNORA69	chr17	45949677	45949878	chr17_45949677_45949878	202	5	1.00238e-174	1.88022e-69	2.26177e-21	2.15823e-70	0.00408826	0.00295518	chr17	72919704	72920187	chr17_72919704_72920187	484	3	3.75051e-12	0.000701176	0.000442484	0.000341723	0.0010281	0.000843379
SNORA69	SNORA69	chr17	45949677	45949878	chr17_45949677_45949878	202	5	1.00238e-174	1.88022e-69	2.26177e-21	2.15823e-70	0.00408826	0.00295518	chr17	77783551	77784110	chr17_77783551_77784110	560	3	5.98571e-13	0.000300909	3.20555e-05	6.23801e-06	0.000667662	0.000328229
LSP1	LSP1	chr11	2036573	2037173	chr11_2036573_2037173	601	5	4.2381e-179	9.04709e-69	8.37051e-21	5.66445e-71	0.00299582	0.00245307	chr11	20184487	20184718	chr11_20184487_20184718	232	3	8.37117e-12	0.0104245	0.0318836	0.0116752	0.00147183	0.00102292
SGPP2, SCARNA6, SNORD39, SNORA75, SNORA48	SGPP2	chr2	223288331	223291007	chr2_223288331_223291007	2677	15	1.92812705832116e-312	4.35439e-68	2.81375e-23	2.47217e-117	0.00568732	0.00169593	chr2	223289173	223289683	chr2_223289173_223289683	511	6	3.71686e-14	0.0072256	0.000194153	7.27905e-05	0.00114077	0.00035391
ZIC1, SNORA81, SNORD66, SNORD2, Metazoa_SRP, SNORA18, U4	ZIC1	chr3	147136463	147142415	chr3_147136463_147142415	5953	27	7.63205e-52	1.7223e-64	1.39973e-14	1.73341e-88	0.00268642	0.000518585	chr3	147125712	147128998	chr3_147125712_147128998	3287	33	2.48385e-30	1.98744e-06	0.00164851	4.79892e-08	0.00515995	0.00155636
ZIC1, SNORA81, SNORD66, SNORD2, Metazoa_SRP, SNORA18, U4	ZIC1	chr3	147136463	147142415	chr3_147136463_147142415	5953	27	7.63205e-52	1.7223e-64	1.39973e-14	1.73341e-88	0.00268642	0.000518585	chr3	147130477	147130536	chr3_147130477_147130536	60	2	6.88885e-16	1.81473e-05	3.5895e-05	1.184e-05	0.00387873	0.0027408
CCDC140, SCARNA6, SNORD39, SNORA75, SNORA48, PAX3	CCDC140	chr2	223161771	223170370	chr2_223161771_223170370	8600	46	4.64373e-87	6.91736e-63	5.15445e-17	2.82873e-106	0.00358005	0.000302499	chr2	223163573	223163809	chr2_223163573_223163809	237	5	9.37763e-13	0.00642769	0.0634217	0.0118135	0.00196984	0.00112217
SNORA15, RP1-170O19.20, HOXA10	SNORA15	chr7	27215464	27215610	chr7_27215464_27215610	147	3	9.9736e-154	8.18524e-56	9.89213e-22	1.67889e-54	0.00408999	0.0035533	chr7	27213610	27214126	chr7_27213610_27214126	517	8	3.871e-14	0.00530603	0.0329331	0.0108757	0.00119809	0.000836674
SNORA69	SNORA69	chr17	75880269	75881232	chr17_75880269_75881232	964	5	2.44912e-145	2.1437e-54	3.75528e-20	6.63515e-58	0.00249492	0.00097964	chr17	35060451	35060679	chr17_35060451_35060679	229	3	8.90824e-13	1.33307e-05	1.28514e-05	4.089e-06	0.00216258	0.00141697
SNORA69	SNORA69	chr17	75880269	75881232	chr17_75880269_75881232	964	5	2.44912e-145	2.1437e-54	3.75528e-20	6.63515e-58	0.00249492	0.00097964	chr17	72919704	72920187	chr17_72919704_72920187	484	3	3.75051e-12	0.000701176	0.000442484	0.000341723	0.0010281	0.000843379
SNORA69	SNORA69	chr17	75880269	75881232	chr17_75880269_75881232	964	5	2.44912e-145	2.1437e-54	3.75528e-20	6.63515e-58	0.00249492	0.00097964	chr17	77783551	77784110	chr17_77783551_77784110	560	3	5.98571e-13	0.000300909	3.20555e-05	6.23801e-06	0.000667662	0.000328229
LINC00925	LINC00925	chr15	89939252	89940505	chr15_89939252_89940505	1254	5	3.8192e-84	1.1691e-53	2.01287e-15	3.87516e-52	0.00396755	0.00322011	chr15	89921898	89922345	chr15_89921898_89922345	448	4	1.52309e-12	0.00653912	0.00255452	0.00101082	0.00109262	0.000699782
SNORA81, SNORD66, SNORD2, SNORA18, U4	SNORA81	chr3	169383292	169384648	chr3_169383292_169384648	1357	4	1.76804e-123	4.31074e-51	1.78768e-19	1.58203e-52	0.00426574	0.00310236	chr3	157812226	157812763	chr3_157812226_157812763	538	3	4.13276e-17	2.23573e-05	0.00040082	3.12761e-05	0.00209096	0.00163643
SNORD36, SNORD37	SNORD36	chr13	45396698	45396744	chr13_45396698_45396744	47	3	8.65866e-120	3.01653e-49	1.14874e-22	1.75235e-48	0.00349788	0.00265364	chr13	53424812	53425257	chr13_53424812_53425257	446	2	8.48653e-13	0.00135367	0.00579132	0.00193353	0.000819326	0.00074089
SP9, SNORA4, SNORD11, SNORD51, SNORA41, SCARNA6, SNORD39, SNORA75, ACA59, SNORA48, AC018470.1, SNORA43, SNORA1, Vault	SP9	chr2	175197892	175211131	chr2_175197892_175211131	13240	47	5.21317e-90	3.71048e-49	2.5915e-21	1.42984e-126	0.00388261	0.000417999	chr2	175199646	175200844	chr2_175199646_175200844	1199	10	2.8545e-13	0.028191	0.0161235	0.00716466	0.00147832	0.000684781
SNORA17, HPSE2	SNORA17	chr10	100992222	100997023	chr10_100992222_100997023	4802	29	1.58326e-109	7.29408e-49	4.82556e-13	1.12074e-81	0.00286792	0.000815978	chr10	100993108	100993938	chr10_100993108_100993938	831	10	1.01296e-12	0.00830638	0.137249	0.0259769	0.00163311	0.000878793
SNORA69	SNORA69	chr17	41836261	41837048	chr17_41836261_41837048	788	3	4.81524e-106	3.06833e-45	2.37345e-21	3.39881e-45	0.00237834	0.00223552	chr17	35060451	35060679	chr17_35060451_35060679	229	3	8.90824e-13	1.33307e-05	1.28514e-05	4.089e-06	0.00216258	0.00141697
SNORA69	SNORA69	chr17	41836261	41837048	chr17_41836261_41837048	788	3	4.81524e-106	3.06833e-45	2.37345e-21	3.39881e-45	0.00237834	0.00223552	chr17	72919704	72920187	chr17_72919704_72920187	484	3	3.75051e-12	0.000701176	0.000442484	0.000341723	0.0010281	0.000843379
SNORA69	SNORA69	chr17	41836261	41837048	chr17_41836261_41837048	788	3	4.81524e-106	3.06833e-45	2.37345e-21	3.39881e-45	0.00237834	0.00223552	chr17	77783551	77784110	chr17_77783551_77784110	560	3	5.98571e-13	0.000300909	3.20555e-05	6.23801e-06	0.000667662	0.000328229
SNORA38, SNORA8, SNORD28, SIM1, SNORA20	SNORA38	chr6	100901804	100906895	chr6_100901804_100906895	5092	22	1.09781e-94	1.95734e-43	6.11206e-15	1.10598e-69	0.00218338	0.000489181	chr6	100903227	100903575	chr6_100903227_100903575	349	3	6.01524e-12	0.0292306	0.0113734	0.0174458	0.00190495	0.00111523
SNORA69	SNORA69	chr17	80255419	80256028	chr17_80255419_80256028	610	5	1.12269e-72	2.15641e-39	1.18816e-13	2.99511e-39	-0.00314108	-0.00188649	chr17	35060451	35060679	chr17_35060451_35060679	229	3	8.90824e-13	1.33307e-05	1.28514e-05	4.089e-06	0.00216258	0.00141697
SNORA69	SNORA69	chr17	80255419	80256028	chr17_80255419_80256028	610	5	1.12269e-72	2.15641e-39	1.18816e-13	2.99511e-39	-0.00314108	-0.00188649	chr17	72919704	72920187	chr17_72919704_72920187	484	3	3.75051e-12	0.000701176	0.000442484	0.000341723	0.0010281	0.000843379
SNORA69	SNORA69	chr17	80255419	80256028	chr17_80255419_80256028	610	5	1.12269e-72	2.15641e-39	1.18816e-13	2.99511e-39	-0.00314108	-0.00188649	chr17	77783551	77784110	chr17_77783551_77784110	560	3	5.98571e-13	0.000300909	3.20555e-05	6.23801e-06	0.000667662	0.000328229
snoZ6, SNORA27, SNORA68, RPS23P5, SNORA57, 7SK, OTP, SNORD45	snoZ6	chr5	76934327	76937980	chr5_76934327_76937980	3654	18	2.44478e-65	4.3392e-39	4.57939e-15	1.74018e-63	0.00241502	0.000427164	chr5	76926079	76926752	chr5_76926079_76926752	674	4	4.79854e-21	3.00205e-07	1.61194e-06	5.35936e-08	0.00203406	0.000935838
SNORD65	SNORD65	chr4	152966935	152967415	chr4_152966935_152967415	481	4	3.2511e-72	1.18221e-38	1.88094e-15	4.85476e-39	0.0024145	0.00149058	chr4	147557774	147558544	chr4_147557774_147558544	771	5	7.67906e-30	3.06944e-07	3.8564e-08	1.42195e-12	0.00301389	0.00222257
SNORD65	SNORD65	chr4	152966935	152967415	chr4_152966935_152967415	481	4	3.2511e-72	1.18221e-38	1.88094e-15	4.85476e-39	0.0024145	0.00149058	chr4	174443366	174443865	chr4_174443366_174443865	500	4	2.23518e-12	0.000740629	0.030307	0.00204937	0.00148324	0.00120957
SNORD36, SOX1	SNORD36	chr13	112725605	112727160	chr13_112725605_112727160	1556	8	3.92495e-91	2.46678e-37	8.66101e-14	2.3718e-46	0.00248973	0.00092492	chr13	112722719	112723581	chr13_112722719_112723581	863	6	2.62235e-15	0.000126521	0.031724	0.000650313	0.00294806	0.00179499
snoU13, Y_RNA, SCARNA16, U1, SCARNA18, SCARNA24, SNORD112, SNORA62, SNORA63, SNORD46, FOXD2, SNORA2, SNORD81, U3, SNORA51, SNORA25, SCARNA20, SNORA67, U6, SNORA70, SNORA77, SNORA26, U8, SCARNA11, SNORA31, SNORA42, SNORA40, SNORD64, ACA64, snoU109, SNORD60, SNORD116	snoU13	chr1	47904465	47907054	chr1_47904465_47907054	2590	5	1.52545e-96	5.83295e-34	1.38902e-20	1.61948e-46	0.00541167	0.0024544	chr1	47903801	47904171	chr1_47903801_47904171	371	2	6.16111e-13	1.39196e-06	0.000405057	3.41189e-06	0.000483477	0.000439301
SNORA11, PITX2, SNORD65	SNORA11	chr4	111560494	111563111	chr4_111560494_111563111	2618	9	1.83042e-90	1.4561e-33	2.92236e-20	1.21457e-43	0.00120562	0.000535095	chr4	111543401	111544463	chr4_111543401_111544463	1063	9	7.52494e-14	0.000648606	0.050717	0.00187374	0.00209458	0.000813929
SNORA73, SNORA64, SNORD75, SNORA74, snR65, 5S_rRNA, SCARNA6, SNORD39, SNORD18, SNORA36, SNORA75, SNORA48, SNORD56, SNORA43, SNORA1, Vault	SNORA73	chr2	45028225	45030384	chr2_45028225_45030384	2160	14	1.40256e-61	4.4337e-33	1.68621e-13	1.07039e-52	0.00227423	0.000542852	chr2	43020129	43020264	chr2_43020129_43020264	136	3	1.49848e-11	0.00652806	0.0156706	0.00886975	0.00177091	0.000805603
SNORD65	SNORD65	chr4	154373479	154373513	chr4_154373479_154373513	35	2	6.37433e-72	4.44288e-33	1.87111e-18	2.04537e-32	0.00282881	0.00274126	chr4	147557774	147558544	chr4_147557774_147558544	771	5	7.67906e-30	3.06944e-07	3.8564e-08	1.42195e-12	0.00301389	0.00222257
SNORD65	SNORD65	chr4	154373479	154373513	chr4_154373479_154373513	35	2	6.37433e-72	4.44288e-33	1.87111e-18	2.04537e-32	0.00282881	0.00274126	chr4	174443366	174443865	chr4_174443366_174443865	500	4	2.23518e-12	0.000740629	0.030307	0.00204937	0.00148324	0.00120957
SNORD36	SNORD36	chr13	100607772	100613240	chr13_100607772_100613240	5469	18	2.8701e-42	6.91977e-33	3.06977e-10	3.50706e-46	0.00172086	0.000480899	chr13	112720927	112721425	chr13_112720927_112721425	499	3	5.77784e-13	0.0251202	0.0449875	0.0329645	0.00142367	0.00101572
snoU13, Y_RNA, SCARNA16, U1, SNORD112, SNORA63, SNORD46, SNORA2, SNORD81, U3, SNORA51, SNORA25, SNORA58, CKS1B, SCARNA20, SNORA67, U6, SNORA70, SNORA77, SNORA26, U8, SCARNA11, SNORA31, SNORA42, SNORA40, SNORD64, ACA64, SNORD78, snoU109, SNORD60, SNORD116	snoU13	chr1	91189450	91192803	chr1_91189450_91192803	3354	24	2.18261e-71	2.39389e-32	6.34335e-12	7.6698e-55	0.00121149	0.000215122	chr1	91172288	91172337	chr1_91172288_91172337	50	2	1.87497e-12	0.0188194	0.00699173	0.0107396	0.00161514	0.000882884
snoU13, Y_RNA, SCARNA16, U1, SNORD112, SNORA63, SNORD46, SNORA2, SNORD81, U3, SNORA51, SNORA25, SNORA58, CKS1B, SCARNA20, SNORA67, U6, SNORA70, SNORA77, SNORA26, U8, SCARNA11, SNORA31, SNORA42, SNORA40, SNORD64, ACA64, SNORD78, snoU109, SNORD60, SNORD116	snoU13	chr1	91189450	91192803	chr1_91189450_91192803	3354	24	2.18261e-71	2.39389e-32	6.34335e-12	7.6698e-55	0.00121149	0.000215122	chr1	91190366	91190891	chr1_91190366_91190891	526	5	1.48921e-12	0.00879172	0.0648127	0.0203167	0.002145	0.00146291
SNORA73, SNORA64, SNORA12, SNORA74, CTNNA2, SNORA19, snR65, 5S_rRNA, SNORA4, SNORD11, SNORA41, SCARNA6, SNORD39, SNORD18, SNORA75, ACA59, SNORA48, SNORD56, SNORA43, SNORA1, Vault	SNORA73	chr2	80549579	80550119	chr2_80549579_80550119	541	5	6.59658e-51	1.01529e-31	2.58436e-12	2.16301e-31	0.00211827	0.00117102	chr2	79739254	79740322	chr2_79739254_79740322	1069	10	8.27849e-15	0.00493138	0.0135085	0.00258231	0.00212194	0.000973292
SNORD36	SNORD36	chr13	100630170	100632250	chr13_100630170_100632250	2081	7	6.28426e-64	1.18451e-31	1.27086e-14	1.30456e-35	0.001551	0.000605414	chr13	112720927	112721425	chr13_112720927_112721425	499	3	5.77784e-13	0.0251202	0.0449875	0.0329645	0.00142367	0.00101572
SNORD36	SNORD36	chr13	114107876	114109949	chr13_114107876_114109949	2074	15	3.75916e-57	1.34431e-31	2.30928e-10	1.74813e-38	0.00176402	0.00042178	chr13	112720927	112721425	chr13_112720927_112721425	499	3	5.77784e-13	0.0251202	0.0449875	0.0329645	0.00142367	0.00101572
SNORA15, RP1-170O19.20, HOXA10	SNORA15	chr7	27218867	27220398	chr7_27218867_27220398	1532	9	1.8529e-64	2.50367e-31	7.53861e-17	3.37356e-44	0.00372557	0.00106047	chr7	27213610	27214126	chr7_27213610_27214126	517	8	3.871e-14	0.00530603	0.0329331	0.0108757	0.00119809	0.000836674
SNORA69	SNORA69	chr17	78999347	79001543	chr17_78999347_79001543	2197	11	1.43092e-59	5.01165e-31	2.69346e-15	6.27772e-36	-0.00274352	-0.000736908	chr17	35060451	35060679	chr17_35060451_35060679	229	3	8.90824e-13	1.33307e-05	1.28514e-05	4.089e-06	0.00216258	0.00141697
SNORA69	SNORA69	chr17	78999347	79001543	chr17_78999347_79001543	2197	11	1.43092e-59	5.01165e-31	2.69346e-15	6.27772e-36	-0.00274352	-0.000736908	chr17	72919704	72920187	chr17_72919704_72920187	484	3	3.75051e-12	0.000701176	0.000442484	0.000341723	0.0010281	0.000843379
SNORA69	SNORA69	chr17	78999347	79001543	chr17_78999347_79001543	2197	11	1.43092e-59	5.01165e-31	2.69346e-15	6.27772e-36	-0.00274352	-0.000736908	chr17	77783551	77784110	chr17_77783551_77784110	560	3	5.98571e-13	0.000300909	3.20555e-05	6.23801e-06	0.000667662	0.000328229
SNORA69	SNORA69	chr17	75537017	75537444	chr17_75537017_75537444	428	2	6.4302e-65	2.4239e-30	1.84369e-18	7.26791e-30	0.00290193	0.0025089	chr17	35060451	35060679	chr17_35060451_35060679	229	3	8.90824e-13	1.33307e-05	1.28514e-05	4.089e-06	0.00216258	0.00141697
SNORA69	SNORA69	chr17	75537017	75537444	chr17_75537017_75537444	428	2	6.4302e-65	2.4239e-30	1.84369e-18	7.26791e-30	0.00290193	0.0025089	chr17	72919704	72920187	chr17_72919704_72920187	484	3	3.75051e-12	0.000701176	0.000442484	0.000341723	0.0010281	0.000843379
SNORA69	SNORA69	chr17	75537017	75537444	chr17_75537017_75537444	428	2	6.4302e-65	2.4239e-30	1.84369e-18	7.26791e-30	0.00290193	0.0025089	chr17	77783551	77784110	chr17_77783551_77784110	560	3	5.98571e-13	0.000300909	3.20555e-05	6.23801e-06	0.000667662	0.000328229
SNORA69	SNORA69	chr17	42019840	42020846	chr17_42019840_42020846	1007	5	9.43829e-58	3.87407e-30	1.28634e-12	8.30914e-33	0.00286796	0.00134784	chr17	35060451	35060679	chr17_35060451_35060679	229	3	8.90824e-13	1.33307e-05	1.28514e-05	4.089e-06	0.00216258	0.00141697
SNORA69	SNORA69	chr17	42019840	42020846	chr17_42019840_42020846	1007	5	9.43829e-58	3.87407e-30	1.28634e-12	8.30914e-33	0.00286796	0.00134784	chr17	72919704	72920187	chr17_72919704_72920187	484	3	3.75051e-12	0.000701176	0.000442484	0.000341723	0.0010281	0.000843379
SNORA69	SNORA69	chr17	42019840	42020846	chr17_42019840_42020846	1007	5	9.43829e-58	3.87407e-30	1.28634e-12	8.30914e-33	0.00286796	0.00134784	chr17	77783551	77784110	chr17_77783551_77784110	560	3	5.98571e-13	0.000300909	3.20555e-05	6.23801e-06	0.000667662	0.000328229
HOXC4, snoMe28S-Am2634	HOXC4	chr12	54446019	54449761	chr12_54446019_54449761	3743	27	1.42923e-76	6.72546e-30	2.467e-10	1.997e-52	0.00340054	0.000702805	chr12	54447807	54448769	chr12_54447807_54448769	963	6	1.02504e-19	0.00158864	8.46217e-06	7.53204e-05	0.00417648	0.00194722
RP11-379F12.4, GATA3, GATA3-AS1, RP11-379F12.3	RP11	chr10	8092775	8100761	chr10_8092775_8100761	7987	64	1.37142e-100	7.1184e-30	7.91018e-16	3.81127e-88	0.00322004	0.000331784	chr10	8094093	8097331	chr10_8094093_8097331	3239	51	8.29002e-36	0.00453399	0.0436348	9.68958e-06	0.00354844	0.000621246
SNORA73, SNORA64, SNORD75, SNORA74, snR65, 5S_rRNA, SCARNA6, SNORD39, SNORD18, SNORA36, SNORA75, SNORA48, SNORD56, SNORA43, SNORA1, Vault	SNORA73	chr2	43188839	43188940	chr2_43188839_43188940	102	3	1.17432e-107	1.59955e-29	3.93597e-25	1.46171e-33	0.00431258	0.00214122	chr2	43020129	43020264	chr2_43020129_43020264	136	3	1.49848e-11	0.00652806	0.0156706	0.00886975	0.00177091	0.000805603
snoU13, Y_RNA, SCARNA16, SCARNA21, SNORD112, SNORA62, SNORA2, U3, SNORA51, SCARNA20, SNORA67, SNORA70, SNORA77, SNORA26, U8, SCARNA11, SNORA31, SNORA42, SNORA40, snoU109, SNORD60	snoU13	chr1	10948457	10949944	chr1_10948457_10949944	1488	3	1.44561e-33	2.08536e-28	1.94624e-13	1.44602e-27	0.00245673	0.00157421	chr1	11919095	11919699	chr1_11919095_11919699	605	7	3.54165e-14	0.000970239	0.00258365	0.000422394	0.00139384	0.000625622
SNORA69	SNORA69	chr17	33672713	33673476	chr17_33672713_33673476	764	4	3.66738e-80	2.56029e-28	1.05718e-15	8.69839e-37	0.002515	0.00143722	chr17	35060451	35060679	chr17_35060451_35060679	229	3	8.90824e-13	1.33307e-05	1.28514e-05	4.089e-06	0.00216258	0.00141697
SNORA69	SNORA69	chr17	33672713	33673476	chr17_33672713_33673476	764	4	3.66738e-80	2.56029e-28	1.05718e-15	8.69839e-37	0.002515	0.00143722	chr17	72919704	72920187	chr17_72919704_72920187	484	3	3.75051e-12	0.000701176	0.000442484	0.000341723	0.0010281	0.000843379
SNORA69	SNORA69	chr17	33672713	33673476	chr17_33672713_33673476	764	4	3.66738e-80	2.56029e-28	1.05718e-15	8.69839e-37	0.002515	0.00143722	chr17	77783551	77784110	chr17_77783551_77784110	560	3	5.98571e-13	0.000300909	3.20555e-05	6.23801e-06	0.000667662	0.000328229
SNORD36	SNORD36	chr13	93877559	93877835	chr13_93877559_93877835	277	2	1.47999e-59	1.17126e-27	6.65866e-17	3.47682e-27	0.00478846	0.00350565	chr13	112720927	112721425	chr13_112720927_112721425	499	3	5.77784e-13	0.0251202	0.0449875	0.0329645	0.00142367	0.00101572
TENM4	TENM4	chr11	78534072	78534297	chr11_78534072_78534297	226	2	3.54191e-57	1.34012e-27	5.29524e-18	2.4242e-27	-0.00504523	-0.00457826	chr11	79151719	79152112	chr11_79151719_79152112	394	7	1.10371e-13	0.0051832	0.00547467	0.00132716	0.00095253	0.000481009
SNORD65	SNORD65	chr4	139609965	139610188	chr4_139609965_139610188	224	4	9.92468e-41	3.0029e-27	2.63289e-10	3.50309e-26	0.00183754	0.00160301	chr4	147557774	147558544	chr4_147557774_147558544	771	5	7.67906e-30	3.06944e-07	3.8564e-08	1.42195e-12	0.00301389	0.00222257
SNORD65	SNORD65	chr4	139609965	139610188	chr4_139609965_139610188	224	4	9.92468e-41	3.0029e-27	2.63289e-10	3.50309e-26	0.00183754	0.00160301	chr4	174443366	174443865	chr4_174443366_174443865	500	4	2.23518e-12	0.000740629	0.030307	0.00204937	0.00148324	0.00120957
snoU13, Y_RNA, SCARNA16, U1, SCARNA18, SCARNA24, SNORD112, SNORA62, SNORA63, SNORD46, SNORA2, SNORD81, U3, SNORA51, SNORA25, SCARNA20, SNORA67, U6, SNORA70, SNORA77, SNORA26, U8, SCARNA11, SNORA31, SNORA42, SNORA40, SNORD64, ACA64, snoU109, SNORD60, SNORD116	snoU13	chr1	51442133	51444685	chr1_51442133_51444685	2553	13	2.9275e-159	5.01034e-27	1.30525e-26	4.03712e-71	0.00906669	0.00172237	chr1	47910239	47910456	chr1_47910239_47910456	218	2	8.11997e-12	0.00471268	0.0303093	0.0083994	0.00128211	0.00109306
OCA2	OCA2	chr15	28339563	28340459	chr15_28339563_28340459	897	5	1.1528e-53	1.80776e-26	4.11227e-12	3.62719e-30	0.00549018	0.00236743	chr15	28344273	28344730	chr15_28344273_28344730	458	13	1.16654e-15	0.018106	0.00543872	0.0020431	0.00177421	0.000542382
SNORD36	SNORD36	chr13	107069935	107070047	chr13_107069935_107070047	113	2	2.71995e-48	2.08128e-26	3.61679e-14	9.58418e-26	0.00303627	0.00302629	chr13	112720927	112721425	chr13_112720927_112721425	499	3	5.77784e-13	0.0251202	0.0449875	0.0329645	0.00142367	0.00101572
SNORA69	SNORA69	chr17	25676201	25676827	chr17_25676201_25676827	627	5	4.96039e-82	2.17068e-26	1.04517e-17	1.98797e-35	0.00438447	0.00157088	chr17	35060451	35060679	chr17_35060451_35060679	229	3	8.90824e-13	1.33307e-05	1.28514e-05	4.089e-06	0.00216258	0.00141697
SNORA69	SNORA69	chr17	25676201	25676827	chr17_25676201_25676827	627	5	4.96039e-82	2.17068e-26	1.04517e-17	1.98797e-35	0.00438447	0.00157088	chr17	72919704	72920187	chr17_72919704_72920187	484	3	3.75051e-12	0.000701176	0.000442484	0.000341723	0.0010281	0.000843379
SNORA69	SNORA69	chr17	25676201	25676827	chr17_25676201_25676827	627	5	4.96039e-82	2.17068e-26	1.04517e-17	1.98797e-35	0.00438447	0.00157088	chr17	77783551	77784110	chr17_77783551_77784110	560	3	5.98571e-13	0.000300909	3.20555e-05	6.23801e-06	0.000667662	0.000328229
SNORA69	SNORA69	chr17	43065055	43065876	chr17_43065055_43065876	822	4	2.20115e-45	5.22736e-26	1.22064e-11	2.31301e-26	0.00362665	0.00193108	chr17	35060451	35060679	chr17_35060451_35060679	229	3	8.90824e-13	1.33307e-05	1.28514e-05	4.089e-06	0.00216258	0.00141697
SNORA69	SNORA69	chr17	43065055	43065876	chr17_43065055_43065876	822	4	2.20115e-45	5.22736e-26	1.22064e-11	2.31301e-26	0.00362665	0.00193108	chr17	72919704	72920187	chr17_72919704_72920187	484	3	3.75051e-12	0.000701176	0.000442484	0.000341723	0.0010281	0.000843379
SNORA69	SNORA69	chr17	43065055	43065876	chr17_43065055_43065876	822	4	2.20115e-45	5.22736e-26	1.22064e-11	2.31301e-26	0.00362665	0.00193108	chr17	77783551	77784110	chr17_77783551_77784110	560	3	5.98571e-13	0.000300909	3.20555e-05	6.23801e-06	0.000667662	0.000328229
SNORD36	SNORD36	chr13	110396942	110398293	chr13_110396942_110398293	1352	5	2.53055e-53	6.31543e-26	6.29434e-14	6.29979e-31	0.00327992	0.00175115	chr13	112720927	112721425	chr13_112720927_112721425	499	3	5.77784e-13	0.0251202	0.0449875	0.0329645	0.00142367	0.00101572
LSP1	LSP1	chr11	2883529	2884460	chr11_2883529_2884460	932	9	3.18662e-60	7.11479e-26	4.99397e-12	2.06837e-36	0.00250178	0.00133557	chr11	20184487	20184718	chr11_20184487_20184718	232	3	8.37117e-12	0.0104245	0.0318836	0.0116752	0.00147183	0.00102292
SNORD36, RNF219-AS1, RP11-52L5.6	SNORD36	chr13	79169714	79171679	chr13_79169714_79171679	1966	14	3.28329e-49	7.50778e-26	7.77942e-14	9.19273e-39	0.00181962	0.000277397	chr13	79170146	79170959	chr13_79170146_79170959	814	6	7.28833e-15	0.00581035	0.0290334	0.00517172	0.00129584	0.000796063
SNORA69	SNORA69	chr17	8311594	8311836	chr17_8311594_8311836	243	4	1.32947e-45	1.2413e-25	1.35732e-14	5.8055e-26	-0.00246192	-0.00139624	chr17	35060451	35060679	chr17_35060451_35060679	229	3	8.90824e-13	1.33307e-05	1.28514e-05	4.089e-06	0.00216258	0.00141697
SNORA69	SNORA69	chr17	8311594	8311836	chr17_8311594_8311836	243	4	1.32947e-45	1.2413e-25	1.35732e-14	5.8055e-26	-0.00246192	-0.00139624	chr17	72919704	72920187	chr17_72919704_72920187	484	3	3.75051e-12	0.000701176	0.000442484	0.000341723	0.0010281	0.000843379
SNORA69	SNORA69	chr17	8311594	8311836	chr17_8311594_8311836	243	4	1.32947e-45	1.2413e-25	1.35732e-14	5.8055e-26	-0.00246192	-0.00139624	chr17	77783551	77784110	chr17_77783551_77784110	560	3	5.98571e-13	0.000300909	3.20555e-05	6.23801e-06	0.000667662	0.000328229
TMEM179	TMEM179	chr14	105041531	105041708	chr14_105041531_105041708	178	3	1.82754e-70	2.37718e-25	1.4982e-19	1.6735e-30	0.00287638	0.00208031	chr14	105070749	105071382	chr14_105070749_105071382	634	5	1.10371e-13	0.00105085	0.000502992	8.25608e-05	0.00158742	0.00111654
SNORA69	SNORA69	chr17	38708399	38708809	chr17_38708399_38708809	411	4	2.7794e-40	3.59763e-25	5.09709e-12	1.06536e-24	-0.00388722	-0.00142741	chr17	35060451	35060679	chr17_35060451_35060679	229	3	8.90824e-13	1.33307e-05	1.28514e-05	4.089e-06	0.00216258	0.00141697
SNORA69	SNORA69	chr17	38708399	38708809	chr17_38708399_38708809	411	4	2.7794e-40	3.59763e-25	5.09709e-12	1.06536e-24	-0.00388722	-0.00142741	chr17	72919704	72920187	chr17_72919704_72920187	484	3	3.75051e-12	0.000701176	0.000442484	0.000341723	0.0010281	0.000843379
SNORA69	SNORA69	chr17	38708399	38708809	chr17_38708399_38708809	411	4	2.7794e-40	3.59763e-25	5.09709e-12	1.06536e-24	-0.00388722	-0.00142741	chr17	77783551	77784110	chr17_77783551_77784110	560	3	5.98571e-13	0.000300909	3.20555e-05	6.23801e-06	0.000667662	0.000328229
SNORA69	SNORA69	chr17	48040877	48043063	chr17_48040877_48043063	2187	12	1.21148e-49	7.05736e-25	2.80554e-16	2.05242e-39	0.0021427	0.00044537	chr17	35060451	35060679	chr17_35060451_35060679	229	3	8.90824e-13	1.33307e-05	1.28514e-05	4.089e-06	0.00216258	0.00141697
SNORA69	SNORA69	chr17	48040877	48043063	chr17_48040877_48043063	2187	12	1.21148e-49	7.05736e-25	2.80554e-16	2.05242e-39	0.0021427	0.00044537	chr17	72919704	72920187	chr17_72919704_72920187	484	3	3.75051e-12	0.000701176	0.000442484	0.000341723	0.0010281	0.000843379
SNORA69	SNORA69	chr17	48040877	48043063	chr17_48040877_48043063	2187	12	1.21148e-49	7.05736e-25	2.80554e-16	2.05242e-39	0.0021427	0.00044537	chr17	77783551	77784110	chr17_77783551_77784110	560	3	5.98571e-13	0.000300909	3.20555e-05	6.23801e-06	0.000667662	0.000328229
ZIC1, SNORA81, SNORD66, SNORD2, ZIC4, Metazoa_SRP, SNORA18, U4	ZIC1	chr3	147110229	147113918	chr3_147110229_147113918	3690	20	1.40128e-102	1.61305e-24	8.64654e-13	8.35113e-52	0.00281667	0.000495626	chr3	147110667	147111660	chr3_147110667_147111660	994	5	3.25137e-13	0.00323723	0.0826527	0.0114497	0.00191445	0.00120905
SNORA38, SNORA8, SNORD28, SNORA20	SNORA38	chr6	107809317	107810578	chr6_107809317_107810578	1262	6	6.01833e-109	1.98866e-24	2.43392e-17	1.26193e-41	0.00267355	0.000950027	chr6	100050506	100051841	chr6_100050506_100051841	1336	11	1.76331e-19	0.00013563	0.0231118	4.12642e-05	0.00113676	0.000571765
SNORA38, SNORA8, SNORD28, SNORA20	SNORA38	chr6	107809317	107810578	chr6_107809317_107810578	1262	6	6.01833e-109	1.98866e-24	2.43392e-17	1.26193e-41	0.00267355	0.000950027	chr6	100912906	100913592	chr6_100912906_100913592	687	6	1.80809e-27	4.28586e-09	3.88355e-06	9.55214e-10	0.00153584	0.00100345
SNORA38, SNORA8, SNORD28, SNORA20	SNORA38	chr6	107809317	107810578	chr6_107809317_107810578	1262	6	6.01833e-109	1.98866e-24	2.43392e-17	1.26193e-41	0.00267355	0.000950027	chr6	105388668	105389599	chr6_105388668_105389599	932	6	5.95507e-16	1.21248e-07	0.000447273	1.48279e-07	0.00466408	0.00225804
LINC00925	LINC00925	chr15	89919993	89922989	chr15_89919993_89922989	2997	20	4.6924e-78	3.03237e-24	3.59581e-16	6.0797e-46	0.00270584	0.000714424	chr15	89921898	89922345	chr15_89921898_89922345	448	4	1.52309e-12	0.00653912	0.00255452	0.00101082	0.00109262	0.000699782
SNORA69	SNORA69	chr17	59564657	59564954	chr17_59564657_59564954	298	4	2.13136e-33	3.69562e-24	1.31972e-07	1.16584e-22	0.00212596	0.00150633	chr17	35060451	35060679	chr17_35060451_35060679	229	3	8.90824e-13	1.33307e-05	1.28514e-05	4.089e-06	0.00216258	0.00141697
SNORA69	SNORA69	chr17	59564657	59564954	chr17_59564657_59564954	298	4	2.13136e-33	3.69562e-24	1.31972e-07	1.16584e-22	0.00212596	0.00150633	chr17	72919704	72920187	chr17_72919704_72920187	484	3	3.75051e-12	0.000701176	0.000442484	0.000341723	0.0010281	0.000843379
SNORA69	SNORA69	chr17	59564657	59564954	chr17_59564657_59564954	298	4	2.13136e-33	3.69562e-24	1.31972e-07	1.16584e-22	0.00212596	0.00150633	chr17	77783551	77784110	chr17_77783551_77784110	560	3	5.98571e-13	0.000300909	3.20555e-05	6.23801e-06	0.000667662	0.000328229
SATB2-AS1, SNORD11, SNORD51, SNORA41, SCARNA6, SNORD39, SNORA75, SNORA48, SATB2, SNORA1, Vault	SATB2	chr2	200329486	200335558	chr2_200329486_200335558	6073	25	7.64935e-37	3.87451e-24	9.75193e-12	4.98453e-46	0.00177947	0.000238778	chr2	200334402	200335148	chr2_200334402_200335148	747	9	4.34833e-13	0.017257	0.0255958	0.0100663	0.00107662	0.000553835
U7, SNORD77, CADM2, SNORA33, SNORA81, SNORD66, SNORD2, SNORD5, SNORD38, SNORD63, SNORA24, Metazoa_SRP, SNORA18	U7	chr3	85010606	85011052	chr3_85010606_85011052	447	2	7.01019e-39	2.2051e-23	1.11957e-12	9.56416e-23	0.0032696	0.00292392	chr3	85007732	85008678	chr3_85007732_85008678	947	10	4.29928e-14	0.0071967	0.00655094	0.00460663	0.00150405	0.000492433
SNORD36, RNF219-AS1	SNORD36	chr13	79181021	79184529	chr13_79181021_79184529	3509	18	5.33511e-77	7.30769e-23	1.0429e-14	6.08366e-40	0.00210781	0.000464479	chr13	79182095	79182205	chr13_79182095_79182205	111	2	1.44224e-11	0.00456558	0.00431091	0.00383459	0.0020846	0.00157266
SNORA69	SNORA69	chr17	42705761	42706084	chr17_42705761_42706084	324	2	1.51354e-38	1.82414e-22	2.19267e-13	6.19621e-22	0.00333115	0.00321285	chr17	35060451	35060679	chr17_35060451_35060679	229	3	8.90824e-13	1.33307e-05	1.28514e-05	4.089e-06	0.00216258	0.00141697
SNORA69	SNORA69	chr17	42705761	42706084	chr17_42705761_42706084	324	2	1.51354e-38	1.82414e-22	2.19267e-13	6.19621e-22	0.00333115	0.00321285	chr17	72919704	72920187	chr17_72919704_72920187	484	3	3.75051e-12	0.000701176	0.000442484	0.000341723	0.0010281	0.000843379
SNORA69	SNORA69	chr17	42705761	42706084	chr17_42705761_42706084	324	2	1.51354e-38	1.82414e-22	2.19267e-13	6.19621e-22	0.00333115	0.00321285	chr17	77783551	77784110	chr17_77783551_77784110	560	3	5.98571e-13	0.000300909	3.20555e-05	6.23801e-06	0.000667662	0.000328229
SNORD36	SNORD36	chr13	111505528	111505942	chr13_111505528_111505942	415	3	2.76175e-34	2.34632e-22	4.41306e-11	1.31635e-21	0.00177784	0.00159288	chr13	112720927	112721425	chr13_112720927_112721425	499	3	5.77784e-13	0.0251202	0.0449875	0.0329645	0.00142367	0.00101572
SNORD36	SNORD36	chr13	112999748	113001355	chr13_112999748_113001355	1608	4	7.81762e-54	2.98186e-22	1.91496e-14	3.09443e-26	0.00405448	0.00159271	chr13	112720927	112721425	chr13_112720927_112721425	499	3	5.77784e-13	0.0251202	0.0449875	0.0329645	0.00142367	0.00101572
SYT7, SNORD43	SYT7	chr11	61283307	61284417	chr11_61283307_61284417	1111	6	4.30625e-47	5.17974e-22	1.51734e-14	1.05731e-25	0.00268021	0.000943096	chr11	61334859	61335600	chr11_61334859_61335600	742	6	3.89592e-14	0.000433297	0.00294757	5.56565e-05	0.00222118	0.00118648
PIEZO2	PIEZO2	chr18	11146255	11147785	chr18_11146255_11147785	1531	4	5.73798e-31	7.66717e-22	7.79812e-13	3.77836e-24	0.00208421	0.00113256	chr18	11148510	11149470	chr18_11148510_11149470	961	11	5.47526e-15	0.00106824	0.13079	0.0101234	0.00171423	0.000986643
SNORA38, SNORA8, SNORD28, SNORA20	SNORA38	chr6	100036136	100039476	chr6_100036136_100039476	3341	15	5.40636e-82	2.02697e-21	1.42082e-18	2.1359e-43	0.00209351	0.000443519	chr6	100050506	100051841	chr6_100050506_100051841	1336	11	1.76331e-19	0.00013563	0.0231118	4.12642e-05	0.00113676	0.000571765
SNORA38, SNORA8, SNORD28, SNORA20	SNORA38	chr6	100036136	100039476	chr6_100036136_100039476	3341	15	5.40636e-82	2.02697e-21	1.42082e-18	2.1359e-43	0.00209351	0.000443519	chr6	100912906	100913592	chr6_100912906_100913592	687	6	1.80809e-27	4.28586e-09	3.88355e-06	9.55214e-10	0.00153584	0.00100345
SNORA38, SNORA8, SNORD28, SNORA20	SNORA38	chr6	100036136	100039476	chr6_100036136_100039476	3341	15	5.40636e-82	2.02697e-21	1.42082e-18	2.1359e-43	0.00209351	0.000443519	chr6	105388668	105389599	chr6_105388668_105389599	932	6	5.95507e-16	1.21248e-07	0.000447273	1.48279e-07	0.00466408	0.00225804
ZIC1, SNORA81, SNORD66, SNORD2, ZIC4, Metazoa_SRP, SNORA18, U4	ZIC1	chr3	147115043	147116420	chr3_147115043_147116420	1378	5	7.50907e-72	2.05325e-21	6.93445e-16	1.58667e-31	0.0048616	0.00173376	chr3	147110667	147111660	chr3_147110667_147111660	994	5	3.25137e-13	0.00323723	0.0826527	0.0114497	0.00191445	0.00120905
snoU13, Y_RNA, SCARNA16, U1, SNORD112, SNORA63, SNORD46, SNORA2, SNORD81, U3, SNORA51, SNORA25, SNORA58, CKS1B, SCARNA20, SNORA67, U6, SNORA70, SNORA77, SNORA26, U8, SCARNA11, SNORA31, SNORA42, SNORA40, SNORD64, ACA64, SNORD78, snoU109, SNORD60, SNORD116	snoU13	chr1	93258288	93258319	chr1_93258288_93258319	32	3	1.56897e-41	3.31628e-21	7.34579e-16	2.30268e-22	0.00270833	-0.000206563	chr1	91172288	91172337	chr1_91172288_91172337	50	2	1.87497e-12	0.0188194	0.00699173	0.0107396	0.00161514	0.000882884
snoU13, Y_RNA, SCARNA16, U1, SNORD112, SNORA63, SNORD46, SNORA2, SNORD81, U3, SNORA51, SNORA25, SNORA58, CKS1B, SCARNA20, SNORA67, U6, SNORA70, SNORA77, SNORA26, U8, SCARNA11, SNORA31, SNORA42, SNORA40, SNORD64, ACA64, SNORD78, snoU109, SNORD60, SNORD116	snoU13	chr1	93258288	93258319	chr1_93258288_93258319	32	3	1.56897e-41	3.31628e-21	7.34579e-16	2.30268e-22	0.00270833	-0.000206563	chr1	91190366	91190891	chr1_91190366_91190891	526	5	1.48921e-12	0.00879172	0.0648127	0.0203167	0.002145	0.00146291
CCDC33	CCDC33	chr15	74527185	74528719	chr15_74527185_74528719	1535	6	1.24663e-32	3.68734e-21	3.21474e-11	4.17874e-23	-0.0029932	-0.000833833	chr15	74557527	74557537	chr15_74557527_74557537	11	2	1.64112e-15	1.99334e-08	3.30603e-06	3.23809e-08	0.00380373	0.00344063
SNORD36	SNORD36	chr13	97794052	97794113	chr13_97794052_97794113	62	2	6.81695e-36	5.90649e-21	7.73043e-14	1.15417e-20	0.00191075	0.0018561	chr13	112720927	112721425	chr13_112720927_112721425	499	3	5.77784e-13	0.0251202	0.0449875	0.0329645	0.00142367	0.00101572
SNORA69	SNORA69	chr17	16281514	16282434	chr17_16281514_16282434	921	3	3.03106e-34	6.32153e-21	1.97425e-13	5.22193e-22	-0.00298974	-0.00182853	chr17	35060451	35060679	chr17_35060451_35060679	229	3	8.90824e-13	1.33307e-05	1.28514e-05	4.089e-06	0.00216258	0.00141697
SNORA69	SNORA69	chr17	16281514	16282434	chr17_16281514_16282434	921	3	3.03106e-34	6.32153e-21	1.97425e-13	5.22193e-22	-0.00298974	-0.00182853	chr17	72919704	72920187	chr17_72919704_72920187	484	3	3.75051e-12	0.000701176	0.000442484	0.000341723	0.0010281	0.000843379
SNORA69	SNORA69	chr17	16281514	16282434	chr17_16281514_16282434	921	3	3.03106e-34	6.32153e-21	1.97425e-13	5.22193e-22	-0.00298974	-0.00182853	chr17	77783551	77784110	chr17_77783551_77784110	560	3	5.98571e-13	0.000300909	3.20555e-05	6.23801e-06	0.000667662	0.000328229
snoU13, Y_RNA, SCARNA16, SCARNA21, SNORD112, SNORA62, SNORA2, U3, SNORA51, SCARNA20, SNORA67, SNORA70, SNORA77, SNORA26, U8, SCARNA11, SNORA31, SNORA42, SNORA40, snoU109, SNORD60	snoU13	chr1	10895517	10896343	chr1_10895517_10896343	827	5	2.40985e-41	6.45419e-21	2.2763e-13	5.15317e-26	0.00189314	0.000800896	chr1	11919095	11919699	chr1_11919095_11919699	605	7	3.54165e-14	0.000970239	0.00258365	0.000422394	0.00139384	0.000625622
LSP1	LSP1	chr11	6767766	6767826	chr11_6767766_6767826	61	2	1.42257e-33	1.28026e-20	2.35753e-12	4.22613e-20	-0.00213909	-0.00208484	chr11	20184487	20184718	chr11_20184487_20184718	232	3	8.37117e-12	0.0104245	0.0318836	0.0116752	0.00147183	0.00102292
SNORA69	SNORA69	chr17	80297128	80297325	chr17_80297128_80297325	198	4	9.35956e-50	1.57095e-20	2.00396e-16	8.06095e-25	-0.00282986	-0.00151327	chr17	35060451	35060679	chr17_35060451_35060679	229	3	8.90824e-13	1.33307e-05	1.28514e-05	4.089e-06	0.00216258	0.00141697
SNORA69	SNORA69	chr17	80297128	80297325	chr17_80297128_80297325	198	4	9.35956e-50	1.57095e-20	2.00396e-16	8.06095e-25	-0.00282986	-0.00151327	chr17	72919704	72920187	chr17_72919704_72920187	484	3	3.75051e-12	0.000701176	0.000442484	0.000341723	0.0010281	0.000843379
SNORA69	SNORA69	chr17	80297128	80297325	chr17_80297128_80297325	198	4	9.35956e-50	1.57095e-20	2.00396e-16	8.06095e-25	-0.00282986	-0.00151327	chr17	77783551	77784110	chr17_77783551_77784110	560	3	5.98571e-13	0.000300909	3.20555e-05	6.23801e-06	0.000667662	0.000328229
LSP1	LSP1	chr11	2234043	2235450	chr11_2234043_2235450	1408	7	1.01862e-86	1.77692e-20	2.78684e-16	8.65588e-37	0.00425425	0.00123852	chr11	20184487	20184718	chr11_20184487_20184718	232	3	8.37117e-12	0.0104245	0.0318836	0.0116752	0.00147183	0.00102292
C5orf38	C5orf38	chr5	2755158	2758088	chr5_2755158_2758088	2931	17	1.25066e-102	1.94086e-20	1.81789e-16	1.26241e-46	0.00342567	0.000624642	chr5	2754894	2755540	chr5_2754894_2755540	647	5	9.28629e-15	0.000778745	0.00445875	0.000959587	0.00229586	0.000906013
CCDC33	CCDC33	chr15	74609868	74610683	chr15_74609868_74610683	816	3	1.60379e-27	2.37461e-20	3.70619e-08	2.60609e-19	0.00252276	0.00178013	chr15	74557527	74557537	chr15_74557527_74557537	11	2	1.64112e-15	1.99334e-08	3.30603e-06	3.23809e-08	0.00380373	0.00344063
U7, SNORD77, PDZRN3-AS1, SNORA33, SNORA81, SNORD66, SNORD2, SNORD5, SNORD38, SNORD63, PDZRN3, SNORA24, Metazoa_SRP, SNORA18	U7	chr3	73670763	73673231	chr3_73670763_73673231	2469	6	2.15346e-69	3.04611e-20	3.41731e-20	1.71213e-33	0.0027076	0.000940283	chr3	73673893	73674433	chr3_73673893_73674433	541	12	5.04711e-14	0.0153582	0.143303	0.0309884	0.0018484	0.00116846
OCA2	OCA2	chr15	28014188	28014520	chr15_28014188_28014520	333	3	1.21169e-34	3.08372e-20	3.31292e-11	6.14675e-20	0.00253166	0.000103652	chr15	28344273	28344730	chr15_28344273_28344730	458	13	1.16654e-15	0.018106	0.00543872	0.0020431	0.00177421	0.000542382
SNORA38, SNORA8, SNORD28, SIM1, SNORA20	SNORA38	chr6	100911240	100911964	chr6_100911240_100911964	725	11	2.31958e-41	4.00857e-20	2.61636e-09	1.56776e-26	0.000404538	0.000189045	chr6	100903227	100903575	chr6_100903227_100903575	349	3	6.01524e-12	0.0292306	0.0113734	0.0174458	0.00190495	0.00111523
snoU13, Y_RNA, SCARNA16, SCARNA21, U1, SCARNA17, SCARNA18, SNORD112, SNORA62, SNORA63, SNORD46, SNORA2, SNORD81, U3, SNORA51, SCARNA20, SNORA67, U6, SNORA70, SNORA77, SNORA26, U8, SCARNA11, SNORA31, SNORA42, SNORA40, SNORD64, ACA64, snoU109, SNORD60	snoU13	chr1	27729053	27730185	chr1_27729053_27730185	1133	5	1.04965e-25	4.67532e-20	6.78508e-10	8.26025e-22	-0.00190054	0.000386232	chr1	26735245	26736154	chr1_26735245_26736154	910	10	1.46723e-20	3.52016e-05	0.0165931	1.96531e-05	0.00195578	0.000790606
snoZ6, SNORA27, SNORA68, SNORA57, 7SK, LINC00461, SNORD45, SNORD95	snoZ6	chr5	87967728	87969886	chr5_87967728_87969886	2159	14	2.66322e-52	5.37147e-20	1.26766e-13	1.01693e-29	0.00158087	0.000187953	chr5	87956389	87957260	chr5_87956389_87957260	872	7	9.82399e-21	2.85985e-06	8.38394e-05	4.21112e-07	0.00089718	0.000556894
SNORD65	SNORD65	chr4	124468530	124468840	chr4_124468530_124468840	311	3	5.29675e-45	5.39821e-20	8.12388e-16	2.60679e-22	0.00251258	0.00147342	chr4	147557774	147558544	chr4_147557774_147558544	771	5	7.67906e-30	3.06944e-07	3.8564e-08	1.42195e-12	0.00301389	0.00222257
SNORD65	SNORD65	chr4	124468530	124468840	chr4_124468530_124468840	311	3	5.29675e-45	5.39821e-20	8.12388e-16	2.60679e-22	0.00251258	0.00147342	chr4	174443366	174443865	chr4_174443366_174443865	500	4	2.23518e-12	0.000740629	0.030307	0.00204937	0.00148324	0.00120957
RSRC1, SNORA81, SNORD66, SNORD2, SHOX2, SNORA18, U4	RSRC1	chr3	157823363	157825196	chr3_157823363_157825196	1834	13	1.29959e-44	7.28201e-20	1.25508e-08	5.40633e-27	0.000778564	0.000179476	chr3	157823158	157823817	chr3_157823158_157823817	660	5	1.92957e-14	0.000640257	0.00624913	0.000397441	0.00169858	0.000980669
SNORA38, SNORA8, SNORD28, SNORA20	SNORA38	chr6	113886304	113886340	chr6_113886304_113886340	37	2	2.53932e-31	8.22455e-20	2.1441e-11	3.04374e-19	0.00219176	0.0021301	chr6	100050506	100051841	chr6_100050506_100051841	1336	11	1.76331e-19	0.00013563	0.0231118	4.12642e-05	0.00113676	0.000571765
SNORA38, SNORA8, SNORD28, SNORA20	SNORA38	chr6	113886304	113886340	chr6_113886304_113886340	37	2	2.53932e-31	8.22455e-20	2.1441e-11	3.04374e-19	0.00219176	0.0021301	chr6	100912906	100913592	chr6_100912906_100913592	687	6	1.80809e-27	4.28586e-09	3.88355e-06	9.55214e-10	0.00153584	0.00100345
SNORA38, SNORA8, SNORD28, SNORA20	SNORA38	chr6	113886304	113886340	chr6_113886304_113886340	37	2	2.53932e-31	8.22455e-20	2.1441e-11	3.04374e-19	0.00219176	0.0021301	chr6	105388668	105389599	chr6_105388668_105389599	932	6	5.95507e-16	1.21248e-07	0.000447273	1.48279e-07	0.00466408	0.00225804
SNORD36	SNORD36	chr13	100640914	100644657	chr13_100640914_100644657	3744	25	7.66386e-67	1.08486e-19	7.72514e-14	4.00899e-41	0.0014068	0.000299445	chr13	112720927	112721425	chr13_112720927_112721425	499	3	5.77784e-13	0.0251202	0.0449875	0.0329645	0.00142367	0.00101572
SNORA69	SNORA69	chr17	39204767	39204922	chr17_39204767_39204922	156	3	1.21643e-30	3.16113e-19	2.4375e-10	5.50619e-19	-0.00199989	-0.00134249	chr17	35060451	35060679	chr17_35060451_35060679	229	3	8.90824e-13	1.33307e-05	1.28514e-05	4.089e-06	0.00216258	0.00141697
SNORA69	SNORA69	chr17	39204767	39204922	chr17_39204767_39204922	156	3	1.21643e-30	3.16113e-19	2.4375e-10	5.50619e-19	-0.00199989	-0.00134249	chr17	72919704	72920187	chr17_72919704_72920187	484	3	3.75051e-12	0.000701176	0.000442484	0.000341723	0.0010281	0.000843379
SNORA69	SNORA69	chr17	39204767	39204922	chr17_39204767_39204922	156	3	1.21643e-30	3.16113e-19	2.4375e-10	5.50619e-19	-0.00199989	-0.00134249	chr17	77783551	77784110	chr17_77783551_77784110	560	3	5.98571e-13	0.000300909	3.20555e-05	6.23801e-06	0.000667662	0.000328229
SNORA69	SNORA69	chr17	40609380	40609826	chr17_40609380_40609826	447	3	3.94276e-33	6.72889e-19	3.5377e-11	1.23439e-18	-0.00457924	-0.00258125	chr17	35060451	35060679	chr17_35060451_35060679	229	3	8.90824e-13	1.33307e-05	1.28514e-05	4.089e-06	0.00216258	0.00141697
SNORA69	SNORA69	chr17	40609380	40609826	chr17_40609380_40609826	447	3	3.94276e-33	6.72889e-19	3.5377e-11	1.23439e-18	-0.00457924	-0.00258125	chr17	72919704	72920187	chr17_72919704_72920187	484	3	3.75051e-12	0.000701176	0.000442484	0.000341723	0.0010281	0.000843379
SNORA69	SNORA69	chr17	40609380	40609826	chr17_40609380_40609826	447	3	3.94276e-33	6.72889e-19	3.5377e-11	1.23439e-18	-0.00457924	-0.00258125	chr17	77783551	77784110	chr17_77783551_77784110	560	3	5.98571e-13	0.000300909	3.20555e-05	6.23801e-06	0.000667662	0.000328229
SNORD36	SNORD36	chr13	114926689	114928233	chr13_114926689_114928233	1545	9	6.95163e-57	7.68463e-19	5.46424e-09	2.55754e-29	-0.00241638	-0.000794256	chr13	112720927	112721425	chr13_112720927_112721425	499	3	5.77784e-13	0.0251202	0.0449875	0.0329645	0.00142367	0.00101572
HOXD8, SNORA4, SNORD11, SNORD51, SNORA41, SCARNA6, SNORD39, SNORA75, ACA59, SNORA48, HOXD-AS2, SNORA43, SNORA1, Vault	HOXD8	chr2	176993017	176997707	chr2_176993017_176997707	4691	24	3.02376e-83	1.11193e-18	9.58659e-20	2.18328e-47	0.00261666	0.000235477	chr2	176994142	176995088	chr2_176994142_176995088	947	10	1.41392e-16	0.000604685	0.0529796	0.0009998	0.00260178	0.00104552
SNORA38, SNORA8, SNORD28, SNORA20	SNORA38	chr6	110736941	110737053	chr6_110736941_110737053	113	2	1.20825e-28	1.16588e-18	1.79966e-10	4.44439e-18	-0.00323316	-0.0027238	chr6	100050506	100051841	chr6_100050506_100051841	1336	11	1.76331e-19	0.00013563	0.0231118	4.12642e-05	0.00113676	0.000571765
SNORA38, SNORA8, SNORD28, SNORA20	SNORA38	chr6	110736941	110737053	chr6_110736941_110737053	113	2	1.20825e-28	1.16588e-18	1.79966e-10	4.44439e-18	-0.00323316	-0.0027238	chr6	100912906	100913592	chr6_100912906_100913592	687	6	1.80809e-27	4.28586e-09	3.88355e-06	9.55214e-10	0.00153584	0.00100345
SNORA38, SNORA8, SNORD28, SNORA20	SNORA38	chr6	110736941	110737053	chr6_110736941_110737053	113	2	1.20825e-28	1.16588e-18	1.79966e-10	4.44439e-18	-0.00323316	-0.0027238	chr6	105388668	105389599	chr6_105388668_105389599	932	6	5.95507e-16	1.21248e-07	0.000447273	1.48279e-07	0.00466408	0.00225804
SNORD36	SNORD36	chr13	112837161	112838970	chr13_112837161_112838970	1810	8	4.77655e-32	1.20058e-18	1.94046e-06	6.58582e-22	-0.00133618	0.000545148	chr13	112720927	112721425	chr13_112720927_112721425	499	3	5.77784e-13	0.0251202	0.0449875	0.0329645	0.00142367	0.00101572
SNORA69	SNORA69	chr17	81028049	81028962	chr17_81028049_81028962	914	5	4.83373e-59	2.10348e-18	1.88947e-15	1.41111e-27	0.00302062	0.00114317	chr17	35060451	35060679	chr17_35060451_35060679	229	3	8.90824e-13	1.33307e-05	1.28514e-05	4.089e-06	0.00216258	0.00141697
SNORA69	SNORA69	chr17	81028049	81028962	chr17_81028049_81028962	914	5	4.83373e-59	2.10348e-18	1.88947e-15	1.41111e-27	0.00302062	0.00114317	chr17	72919704	72920187	chr17_72919704_72920187	484	3	3.75051e-12	0.000701176	0.000442484	0.000341723	0.0010281	0.000843379
SNORA69	SNORA69	chr17	81028049	81028962	chr17_81028049_81028962	914	5	4.83373e-59	2.10348e-18	1.88947e-15	1.41111e-27	0.00302062	0.00114317	chr17	77783551	77784110	chr17_77783551_77784110	560	3	5.98571e-13	0.000300909	3.20555e-05	6.23801e-06	0.000667662	0.000328229
TMEM179	TMEM179	chr14	104979372	104979786	chr14_104979372_104979786	415	5	1.28557e-25	3.22308e-18	1.87189e-06	2.96008e-17	-0.00154567	-0.00118443	chr14	105070749	105071382	chr14_105070749_105071382	634	5	1.10371e-13	0.00105085	0.000502992	8.25608e-05	0.00158742	0.00111654
SNORA69	SNORA69	chr17	76141038	76141249	chr17_76141038_76141249	212	2	1.06002e-30	3.70282e-18	1.65431e-11	9.66018e-18	-0.00239146	-0.00198703	chr17	35060451	35060679	chr17_35060451_35060679	229	3	8.90824e-13	1.33307e-05	1.28514e-05	4.089e-06	0.00216258	0.00141697
SNORA69	SNORA69	chr17	76141038	76141249	chr17_76141038_76141249	212	2	1.06002e-30	3.70282e-18	1.65431e-11	9.66018e-18	-0.00239146	-0.00198703	chr17	72919704	72920187	chr17_72919704_72920187	484	3	3.75051e-12	0.000701176	0.000442484	0.000341723	0.0010281	0.000843379
SNORA69	SNORA69	chr17	76141038	76141249	chr17_76141038_76141249	212	2	1.06002e-30	3.70282e-18	1.65431e-11	9.66018e-18	-0.00239146	-0.00198703	chr17	77783551	77784110	chr17_77783551_77784110	560	3	5.98571e-13	0.000300909	3.20555e-05	6.23801e-06	0.000667662	0.000328229
snoU13, Y_RNA, SCARNA16, U1, SNORD112, SNORA63, SNORD46, SNORA2, SNORD81, U3, SNORA51, SNORA25, SNORA58, CKS1B, SCARNA20, SNORA67, U6, SNORA70, SNORA77, SNORA26, U8, SCARNA11, SNORA31, SNORA42, SNORA40, SNORD64, ACA64, SNORD78, snoU109, SNORD60, SNORD116	snoU13	chr1	85085313	85085337	chr1_85085313_85085337	25	2	1.79769e-31	4.84028e-18	3.14424e-12	8.57797e-18	0.00208959	0.00122772	chr1	91172288	91172337	chr1_91172288_91172337	50	2	1.87497e-12	0.0188194	0.00699173	0.0107396	0.00161514	0.000882884
snoU13, Y_RNA, SCARNA16, U1, SNORD112, SNORA63, SNORD46, SNORA2, SNORD81, U3, SNORA51, SNORA25, SNORA58, CKS1B, SCARNA20, SNORA67, U6, SNORA70, SNORA77, SNORA26, U8, SCARNA11, SNORA31, SNORA42, SNORA40, SNORD64, ACA64, SNORD78, snoU109, SNORD60, SNORD116	snoU13	chr1	85085313	85085337	chr1_85085313_85085337	25	2	1.79769e-31	4.84028e-18	3.14424e-12	8.57797e-18	0.00208959	0.00122772	chr1	91190366	91190891	chr1_91190366_91190891	526	5	1.48921e-12	0.00879172	0.0648127	0.0203167	0.002145	0.00146291
SNORD36	SNORD36	chr13	113544125	113545611	chr13_113544125_113545611	1487	5	2.54301e-18	1.37969e-17	1.17474e-07	8.02519e-18	-0.000980431	-0.000649167	chr13	112720927	112721425	chr13_112720927_112721425	499	3	5.77784e-13	0.0251202	0.0449875	0.0329645	0.00142367	0.00101572
SNORD36	SNORD36	chr13	114053863	114058019	chr13_114053863_114058019	4157	13	1.10229e-29	1.56492e-17	8.26588e-11	3.29599e-21	0.00416973	0.000247236	chr13	112720927	112721425	chr13_112720927_112721425	499	3	5.77784e-13	0.0251202	0.0449875	0.0329645	0.00142367	0.00101572
SNORA69	SNORA69	chr17	46795860	46797764	chr17_46795860_46797764	1905	9	3.54622e-39	2.74383e-17	1.05548e-12	1.00282e-32	0.0016666	0.000414618	chr17	35060451	35060679	chr17_35060451_35060679	229	3	8.90824e-13	1.33307e-05	1.28514e-05	4.089e-06	0.00216258	0.00141697
SNORA69	SNORA69	chr17	46795860	46797764	chr17_46795860_46797764	1905	9	3.54622e-39	2.74383e-17	1.05548e-12	1.00282e-32	0.0016666	0.000414618	chr17	72919704	72920187	chr17_72919704_72920187	484	3	3.75051e-12	0.000701176	0.000442484	0.000341723	0.0010281	0.000843379
SNORA69	SNORA69	chr17	46795860	46797764	chr17_46795860_46797764	1905	9	3.54622e-39	2.74383e-17	1.05548e-12	1.00282e-32	0.0016666	0.000414618	chr17	77783551	77784110	chr17_77783551_77784110	560	3	5.98571e-13	0.000300909	3.20555e-05	6.23801e-06	0.000667662	0.000328229
snoU13, Y_RNA, SCARNA16, U1, SNORD112, SNORA63, SNORD46, SNORA2, SNORD81, U3, SNORA51, SNORA25, SNORA58, CKS1B, SCARNA20, SNORA67, U6, SNORA70, SNORA77, SNORA26, U8, SCARNA11, SNORA31, SNORA42, SNORA40, SNORD64, ACA64, SNORD78, snoU109, SNORD60, SNORD116	snoU13	chr1	91184413	91185922	chr1_91184413_91185922	1510	9	3.33258e-42	3.05371e-17	2.28514e-09	5.60094e-25	0.0007664	0.000200734	chr1	91172288	91172337	chr1_91172288_91172337	50	2	1.87497e-12	0.0188194	0.00699173	0.0107396	0.00161514	0.000882884
snoU13, Y_RNA, SCARNA16, U1, SNORD112, SNORA63, SNORD46, SNORA2, SNORD81, U3, SNORA51, SNORA25, SNORA58, CKS1B, SCARNA20, SNORA67, U6, SNORA70, SNORA77, SNORA26, U8, SCARNA11, SNORA31, SNORA42, SNORA40, SNORD64, ACA64, SNORD78, snoU109, SNORD60, SNORD116	snoU13	chr1	91184413	91185922	chr1_91184413_91185922	1510	9	3.33258e-42	3.05371e-17	2.28514e-09	5.60094e-25	0.0007664	0.000200734	chr1	91190366	91190891	chr1_91190366_91190891	526	5	1.48921e-12	0.00879172	0.0648127	0.0203167	0.002145	0.00146291
TMEM179	TMEM179	chr14	105044984	105045992	chr14_105044984_105045992	1009	4	1.79926e-37	3.62722e-17	2.60922e-14	7.74144e-20	-0.00365432	-0.00167025	chr14	105070749	105071382	chr14_105070749_105071382	634	5	1.10371e-13	0.00105085	0.000502992	8.25608e-05	0.00158742	0.00111654
SNORD65	SNORD65	chr4	170897176	170897284	chr4_170897176_170897284	109	3	4.71831e-25	3.79556e-17	9.64705e-10	1.01588e-16	-0.00167735	-0.00138039	chr4	147557774	147558544	chr4_147557774_147558544	771	5	7.67906e-30	3.06944e-07	3.8564e-08	1.42195e-12	0.00301389	0.00222257
SNORD65	SNORD65	chr4	170897176	170897284	chr4_170897176_170897284	109	3	4.71831e-25	3.79556e-17	9.64705e-10	1.01588e-16	-0.00167735	-0.00138039	chr4	174443366	174443865	chr4_174443366_174443865	500	4	2.23518e-12	0.000740629	0.030307	0.00204937	0.00148324	0.00120957
SNORD36, LINC00554	SNORD36	chr13	100649131	100650387	chr13_100649131_100650387	1257	6	2.69574e-69	4.69035e-17	4.08057e-19	3.94218e-29	0.00308243	0.000950905	chr13	100649800	100650073	chr13_100649800_100650073	274	3	3.38364e-12	1.8921e-05	0.000277859	2.40764e-05	0.00209643	0.00137578
SNORA15, HOXA9, RP1-170O19.20	SNORA15	chr7	27203430	27206907	chr7_27203430_27206907	3478	25	2.0569e-76	5.58625e-17	1.24499e-13	2.1926e-38	0.00303985	0.00041276	chr7	27204349	27205658	chr7_27204349_27205658	1310	16	4.68094e-18	0.0154509	0.0623762	0.00751984	0.00202448	0.000847339
SNORA69	SNORA69	chr17	37024020	37025274	chr17_37024020_37025274	1255	7	5.54255e-45	5.69989e-17	6.26627e-13	2.82304e-22	0.00430969	0.00128183	chr17	35060451	35060679	chr17_35060451_35060679	229	3	8.90824e-13	1.33307e-05	1.28514e-05	4.089e-06	0.00216258	0.00141697
SNORA69	SNORA69	chr17	37024020	37025274	chr17_37024020_37025274	1255	7	5.54255e-45	5.69989e-17	6.26627e-13	2.82304e-22	0.00430969	0.00128183	chr17	72919704	72920187	chr17_72919704_72920187	484	3	3.75051e-12	0.000701176	0.000442484	0.000341723	0.0010281	0.000843379
SNORA69	SNORA69	chr17	37024020	37025274	chr17_37024020_37025274	1255	7	5.54255e-45	5.69989e-17	6.26627e-13	2.82304e-22	0.00430969	0.00128183	chr17	77783551	77784110	chr17_77783551_77784110	560	3	5.98571e-13	0.000300909	3.20555e-05	6.23801e-06	0.000667662	0.000328229
SNORA69	SNORA69	chr17	74128448	74128731	chr17_74128448_74128731	284	2	4.31933e-32	6.00491e-17	4.5114e-14	1.50381e-17	0.00168275	0.00100793	chr17	35060451	35060679	chr17_35060451_35060679	229	3	8.90824e-13	1.33307e-05	1.28514e-05	4.089e-06	0.00216258	0.00141697
SNORA69	SNORA69	chr17	74128448	74128731	chr17_74128448_74128731	284	2	4.31933e-32	6.00491e-17	4.5114e-14	1.50381e-17	0.00168275	0.00100793	chr17	72919704	72920187	chr17_72919704_72920187	484	3	3.75051e-12	0.000701176	0.000442484	0.000341723	0.0010281	0.000843379
SNORA69	SNORA69	chr17	74128448	74128731	chr17_74128448_74128731	284	2	4.31933e-32	6.00491e-17	4.5114e-14	1.50381e-17	0.00168275	0.00100793	chr17	77783551	77784110	chr17_77783551_77784110	560	3	5.98571e-13	0.000300909	3.20555e-05	6.23801e-06	0.000667662	0.000328229
SNORA38, SNORA8, SNORD28, SNORA20	SNORA38	chr6	106440072	106442588	chr6_106440072_106442588	2517	13	2.87408e-73	7.17421e-17	1.13587e-12	2.44506e-33	0.00203928	0.000558693	chr6	100050506	100051841	chr6_100050506_100051841	1336	11	1.76331e-19	0.00013563	0.0231118	4.12642e-05	0.00113676	0.000571765
SNORA38, SNORA8, SNORD28, SNORA20	SNORA38	chr6	106440072	106442588	chr6_106440072_106442588	2517	13	2.87408e-73	7.17421e-17	1.13587e-12	2.44506e-33	0.00203928	0.000558693	chr6	100912906	100913592	chr6_100912906_100913592	687	6	1.80809e-27	4.28586e-09	3.88355e-06	9.55214e-10	0.00153584	0.00100345
SNORA38, SNORA8, SNORD28, SNORA20	SNORA38	chr6	106440072	106442588	chr6_106440072_106442588	2517	13	2.87408e-73	7.17421e-17	1.13587e-12	2.44506e-33	0.00203928	0.000558693	chr6	105388668	105389599	chr6_105388668_105389599	932	6	5.95507e-16	1.21248e-07	0.000447273	1.48279e-07	0.00466408	0.00225804
BSX	BSX	chr11	122850140	122851122	chr11_122850140_122851122	983	8	2.87355e-42	7.27259e-17	1.58057e-10	1.71198e-24	0.000884068	0.000242829	chr11	122852284	122852698	chr11_122852284_122852698	415	9	3.06981e-30	6.29909e-12	0.00111734	3.95011e-11	0.00201093	0.00117782
SNORA69	SNORA69	chr17	63053202	63053996	chr17_63053202_63053996	795	7	2.71703e-106	8.48399e-17	1.73555e-20	5.12444e-34	-0.0035182	-0.000971237	chr17	35060451	35060679	chr17_35060451_35060679	229	3	8.90824e-13	1.33307e-05	1.28514e-05	4.089e-06	0.00216258	0.00141697
SNORA69	SNORA69	chr17	63053202	63053996	chr17_63053202_63053996	795	7	2.71703e-106	8.48399e-17	1.73555e-20	5.12444e-34	-0.0035182	-0.000971237	chr17	72919704	72920187	chr17_72919704_72920187	484	3	3.75051e-12	0.000701176	0.000442484	0.000341723	0.0010281	0.000843379
SNORA69	SNORA69	chr17	63053202	63053996	chr17_63053202_63053996	795	7	2.71703e-106	8.48399e-17	1.73555e-20	5.12444e-34	-0.0035182	-0.000971237	chr17	77783551	77784110	chr17_77783551_77784110	560	3	5.98571e-13	0.000300909	3.20555e-05	6.23801e-06	0.000667662	0.000328229
SNORD36	SNORD36	chr13	113291507	113292951	chr13_113291507_113292951	1445	6	7.49288e-20	1.05909e-16	5.18577e-08	1.87749e-17	0.00187319	0.00105432	chr13	112720927	112721425	chr13_112720927_112721425	499	3	5.77784e-13	0.0251202	0.0449875	0.0329645	0.00142367	0.00101572
LSP1	LSP1	chr11	2294872	2295729	chr11_2294872_2295729	858	3	2.31009e-53	1.2777e-16	9.49496e-16	2.10282e-22	-0.00386077	-0.00248736	chr11	20184487	20184718	chr11_20184487_20184718	232	3	8.37117e-12	0.0104245	0.0318836	0.0116752	0.00147183	0.00102292
SNORA81, SNORD66, SNORD2, SNORA18, U4	SNORA81	chr3	170744540	170744964	chr3_170744540_170744964	425	3	2.73212e-35	2.02115e-16	2.59426e-11	1.48541e-19	0.00220747	0.00153021	chr3	157812226	157812763	chr3_157812226_157812763	538	3	4.13276e-17	2.23573e-05	0.00040082	3.12761e-05	0.00209096	0.00163643
SNORD74, SNORD50, SNORA11, snoU2_19, SNORD65	SNORD74	chr4	87770586	87770782	chr4_87770586_87770782	197	3	6.45753e-24	3.33176e-16	1.10861e-09	6.82994e-16	-0.0014316	-0.00111183	chr4	94749496	94749609	chr4_94749496_94749609	114	3	8.01431e-12	0.035886	0.0646947	0.0447508	0.000860844	0.000806866
SNORD36	SNORD36	chr13	111747937	111748083	chr13_111747937_111748083	147	3	2.56448e-33	3.83129e-16	3.28842e-14	6.51857e-18	-0.0021984	-0.00136783	chr13	112720927	112721425	chr13_112720927_112721425	499	3	5.77784e-13	0.0251202	0.0449875	0.0329645	0.00142367	0.00101572
TBR1, AC009487.5, SLC4A10, SNORA4, SNORD11, SNORD51, SNORA41, SCARNA6, SNORD39, SNORA75, ACA59, SNORA48, AC009487.4, SNORA43, SNORA1, Vault	TBR1	chr2	162279324	162281498	chr2_162279324_162281498	2175	9	2.51708e-73	5.8593e-16	1.47029e-15	4.90192e-32	0.00521501	0.000992363	chr2	162279686	162281498	chr2_162279686_162281498	1813	8	1.74311e-19	1.259e-06	3.21758e-06	5.73133e-09	0.00262244	0.00131311
snoU13, Y_RNA, SCARNA16, U1, SCARNA18, SCARNA24, SNORD112, SNORA62, SNORA63, SNORD46, SNORA2, SNORD81, U3, SNORA51, SNORA25, SCARNA20, SNORA67, U6, SNORA70, SNORA77, SNORA26, U8, SCARNA11, SNORA31, SNORA42, SNORA40, SNORD64, ACA64, snoU109, SNORD60, SNORD116	snoU13	chr1	47998637	47999856	chr1_47998637_47999856	1220	7	1.02593e-99	6.15537e-16	4.21011e-20	1.32675e-31	0.00210746	0.000547651	chr1	47910239	47910456	chr1_47910239_47910456	218	2	8.11997e-12	0.00471268	0.0303093	0.0083994	0.00128211	0.00109306
SNORD36	SNORD36	chr13	113804978	113805721	chr13_113804978_113805721	744	3	7.00726e-24	6.94619e-16	8.29735e-10	1.14287e-15	0.00164503	0.000956587	chr13	112720927	112721425	chr13_112720927_112721425	499	3	5.77784e-13	0.0251202	0.0449875	0.0329645	0.00142367	0.00101572
SNORD36	SNORD36	chr13	98273396	98274012	chr13_98273396_98274012	617	2	4.50315e-35	8.57075e-16	9.66809e-15	4.51793e-17	0.00205733	0.00133316	chr13	112720927	112721425	chr13_112720927_112721425	499	3	5.77784e-13	0.0251202	0.0449875	0.0329645	0.00142367	0.00101572
SNORD36	SNORD36	chr13	114061812	114062507	chr13_114061812_114062507	696	4	1.87952e-46	1.04951e-15	2.73269e-15	1.83255e-20	0.00233119	0.000699826	chr13	112720927	112721425	chr13_112720927_112721425	499	3	5.77784e-13	0.0251202	0.0449875	0.0329645	0.00142367	0.00101572
snoU13, Y_RNA, SCARNA16, U1, SNORD112, SNORA63, SNORD46, SNORA2, SNORD81, U3, SNORA51, SNORA25, SNORA58, CKS1B, SCARNA20, SNORA67, U6, SNORA70, SNORA77, SNORA26, U8, SCARNA11, SNORA31, SNORA42, SNORA40, SNORD64, ACA64, SNORD78, snoU109, SNORD60, SNORD116	snoU13	chr1	86081443	86082316	chr1_86081443_86082316	874	6	3.04851e-31	1.12788e-15	6.47615e-09	1.42498e-18	0.00302278	0.00144533	chr1	91172288	91172337	chr1_91172288_91172337	50	2	1.87497e-12	0.0188194	0.00699173	0.0107396	0.00161514	0.000882884
snoU13, Y_RNA, SCARNA16, U1, SNORD112, SNORA63, SNORD46, SNORA2, SNORD81, U3, SNORA51, SNORA25, SNORA58, CKS1B, SCARNA20, SNORA67, U6, SNORA70, SNORA77, SNORA26, U8, SCARNA11, SNORA31, SNORA42, SNORA40, SNORD64, ACA64, SNORD78, snoU109, SNORD60, SNORD116	snoU13	chr1	86081443	86082316	chr1_86081443_86082316	874	6	3.04851e-31	1.12788e-15	6.47615e-09	1.42498e-18	0.00302278	0.00144533	chr1	91190366	91190891	chr1_91190366_91190891	526	5	1.48921e-12	0.00879172	0.0648127	0.0203167	0.002145	0.00146291
snoU13, Y_RNA, SCARNA16, U1, SNORD112, SNORA63, SNORD46, SNORA2, SNORD81, U3, SNORA51, SNORA25, SNORA58, CKS1B, SCARNA20, SNORA67, U6, SNORA70, SNORA77, SNORA26, U8, SCARNA11, SNORA31, SNORA42, SNORA40, SNORD64, ACA64, SNORD78, snoU109, SNORD60, SNORD116	snoU13	chr1	85219864	85220942	chr1_85219864_85220942	1079	6	1.25192e-39	1.21877e-15	5.91289e-12	8.13931e-22	0.00378977	0.0016681	chr1	91172288	91172337	chr1_91172288_91172337	50	2	1.87497e-12	0.0188194	0.00699173	0.0107396	0.00161514	0.000882884
snoU13, Y_RNA, SCARNA16, U1, SNORD112, SNORA63, SNORD46, SNORA2, SNORD81, U3, SNORA51, SNORA25, SNORA58, CKS1B, SCARNA20, SNORA67, U6, SNORA70, SNORA77, SNORA26, U8, SCARNA11, SNORA31, SNORA42, SNORA40, SNORD64, ACA64, SNORD78, snoU109, SNORD60, SNORD116	snoU13	chr1	85219864	85220942	chr1_85219864_85220942	1079	6	1.25192e-39	1.21877e-15	5.91289e-12	8.13931e-22	0.00378977	0.0016681	chr1	91190366	91190891	chr1_91190366_91190891	526	5	1.48921e-12	0.00879172	0.0648127	0.0203167	0.002145	0.00146291
SNORD36	SNORD36	chr13	112908248	112908629	chr13_112908248_112908629	382	4	6.67752e-24	1.38659e-15	2.35557e-09	1.48318e-15	-0.00191359	-0.00113258	chr13	112720927	112721425	chr13_112720927_112721425	499	3	5.77784e-13	0.0251202	0.0449875	0.0329645	0.00142367	0.00101572
SNORD36	SNORD36	chr13	112788578	112788669	chr13_112788578_112788669	92	2	2.89232e-22	1.51619e-15	1.0461e-08	5.448e-15	-0.00166558	-0.00158702	chr13	112720927	112721425	chr13_112720927_112721425	499	3	5.77784e-13	0.0251202	0.0449875	0.0329645	0.00142367	0.00101572
SNORA69	SNORA69	chr17	75905043	75905560	chr17_75905043_75905560	518	3	1.24834e-46	1.543e-15	9.59546e-14	1.74709e-22	-0.00323212	-0.00205218	chr17	35060451	35060679	chr17_35060451_35060679	229	3	8.90824e-13	1.33307e-05	1.28514e-05	4.089e-06	0.00216258	0.00141697
SNORA69	SNORA69	chr17	75905043	75905560	chr17_75905043_75905560	518	3	1.24834e-46	1.543e-15	9.59546e-14	1.74709e-22	-0.00323212	-0.00205218	chr17	72919704	72920187	chr17_72919704_72920187	484	3	3.75051e-12	0.000701176	0.000442484	0.000341723	0.0010281	0.000843379
SNORA69	SNORA69	chr17	75905043	75905560	chr17_75905043_75905560	518	3	1.24834e-46	1.543e-15	9.59546e-14	1.74709e-22	-0.00323212	-0.00205218	chr17	77783551	77784110	chr17_77783551_77784110	560	3	5.98571e-13	0.000300909	3.20555e-05	6.23801e-06	0.000667662	0.000328229
SNORD36, RNF219-AS1	SNORD36	chr13	79168044	79168573	chr13_79168044_79168573	530	6	4.87664e-39	1.69143e-15	4.85046e-13	5.89133e-18	0.00103591	0.000255774	chr13	79182095	79182205	chr13_79182095_79182205	111	2	1.44224e-11	0.00456558	0.00431091	0.00383459	0.0020846	0.00157266
SNORD65	SNORD65	chr4	129581866	129582864	chr4_129581866_129582864	999	2	6.13315e-37	1.7504e-15	3.2125e-16	1.0592e-17	0.00280316	0.00190964	chr4	147557774	147558544	chr4_147557774_147558544	771	5	7.67906e-30	3.06944e-07	3.8564e-08	1.42195e-12	0.00301389	0.00222257
SNORD65	SNORD65	chr4	129581866	129582864	chr4_129581866_129582864	999	2	6.13315e-37	1.7504e-15	3.2125e-16	1.0592e-17	0.00280316	0.00190964	chr4	174443366	174443865	chr4_174443366_174443865	500	4	2.23518e-12	0.000740629	0.030307	0.00204937	0.00148324	0.00120957
HOXC4, snoMe28S-Am2634	HOXC4	chr12	54440773	54442075	chr12_54440773_54442075	1303	7	1.85545e-54	2.79081e-15	7.57808e-13	1.7402e-25	0.0040233	0.00140271	chr12	54447807	54448769	chr12_54447807_54448769	963	6	1.02504e-19	0.00158864	8.46217e-06	7.53204e-05	0.00417648	0.00194722
TMEM179	TMEM179	chr14	105037412	105037685	chr14_105037412_105037685	274	2	4.30537e-62	2.81549e-15	2.25045e-21	3.51231e-21	0.0042008	0.00258107	chr14	105070749	105071382	chr14_105070749_105071382	634	5	1.10371e-13	0.00105085	0.000502992	8.25608e-05	0.00158742	0.00111654
SNORA69	SNORA69	chr17	74836383	74836683	chr17_74836383_74836683	301	2	1.05336e-33	3.13441e-15	3.93576e-15	6.27048e-17	0.000980532	0.000969057	chr17	35060451	35060679	chr17_35060451_35060679	229	3	8.90824e-13	1.33307e-05	1.28514e-05	4.089e-06	0.00216258	0.00141697
SNORA69	SNORA69	chr17	74836383	74836683	chr17_74836383_74836683	301	2	1.05336e-33	3.13441e-15	3.93576e-15	6.27048e-17	0.000980532	0.000969057	chr17	72919704	72920187	chr17_72919704_72920187	484	3	3.75051e-12	0.000701176	0.000442484	0.000341723	0.0010281	0.000843379
SNORA69	SNORA69	chr17	74836383	74836683	chr17_74836383_74836683	301	2	1.05336e-33	3.13441e-15	3.93576e-15	6.27048e-17	0.000980532	0.000969057	chr17	77783551	77784110	chr17_77783551_77784110	560	3	5.98571e-13	0.000300909	3.20555e-05	6.23801e-06	0.000667662	0.000328229
SNORA69	SNORA69	chr17	41919603	41920477	chr17_41919603_41920477	875	2	4.49523e-20	4.34712e-15	2.61932e-10	8.04476e-15	-0.00170697	-0.00144614	chr17	35060451	35060679	chr17_35060451_35060679	229	3	8.90824e-13	1.33307e-05	1.28514e-05	4.089e-06	0.00216258	0.00141697
SNORA69	SNORA69	chr17	41919603	41920477	chr17_41919603_41920477	875	2	4.49523e-20	4.34712e-15	2.61932e-10	8.04476e-15	-0.00170697	-0.00144614	chr17	72919704	72920187	chr17_72919704_72920187	484	3	3.75051e-12	0.000701176	0.000442484	0.000341723	0.0010281	0.000843379
SNORA69	SNORA69	chr17	41919603	41920477	chr17_41919603_41920477	875	2	4.49523e-20	4.34712e-15	2.61932e-10	8.04476e-15	-0.00170697	-0.00144614	chr17	77783551	77784110	chr17_77783551_77784110	560	3	5.98571e-13	0.000300909	3.20555e-05	6.23801e-06	0.000667662	0.000328229
SNORA69	SNORA69	chr17	79797038	79797373	chr17_79797038_79797373	336	3	2.17868e-51	5.19245e-15	2.34985e-18	5.01166e-21	0.00265422	0.00128612	chr17	35060451	35060679	chr17_35060451_35060679	229	3	8.90824e-13	1.33307e-05	1.28514e-05	4.089e-06	0.00216258	0.00141697
SNORA69	SNORA69	chr17	79797038	79797373	chr17_79797038_79797373	336	3	2.17868e-51	5.19245e-15	2.34985e-18	5.01166e-21	0.00265422	0.00128612	chr17	72919704	72920187	chr17_72919704_72920187	484	3	3.75051e-12	0.000701176	0.000442484	0.000341723	0.0010281	0.000843379
SNORA69	SNORA69	chr17	79797038	79797373	chr17_79797038_79797373	336	3	2.17868e-51	5.19245e-15	2.34985e-18	5.01166e-21	0.00265422	0.00128612	chr17	77783551	77784110	chr17_77783551_77784110	560	3	5.98571e-13	0.000300909	3.20555e-05	6.23801e-06	0.000667662	0.000328229
LSP1	LSP1	chr11	8337383	8337468	chr11_8337383_8337468	86	2	2.4593e-21	5.24179e-15	1.03282e-08	1.76518e-14	0.00167682	0.00150099	chr11	20184487	20184718	chr11_20184487_20184718	232	3	8.37117e-12	0.0104245	0.0318836	0.0116752	0.00147183	0.00102292
SNORA69	SNORA69	chr17	75237170	75238948	chr17_75237170_75238948	1779	9	8.31722e-96	6.9968e-15	5.57221e-18	1.28451e-33	0.0043807	0.000814083	chr17	35060451	35060679	chr17_35060451_35060679	229	3	8.90824e-13	1.33307e-05	1.28514e-05	4.089e-06	0.00216258	0.00141697
SNORA69	SNORA69	chr17	75237170	75238948	chr17_75237170_75238948	1779	9	8.31722e-96	6.9968e-15	5.57221e-18	1.28451e-33	0.0043807	0.000814083	chr17	72919704	72920187	chr17_72919704_72920187	484	3	3.75051e-12	0.000701176	0.000442484	0.000341723	0.0010281	0.000843379
SNORA69	SNORA69	chr17	75237170	75238948	chr17_75237170_75238948	1779	9	8.31722e-96	6.9968e-15	5.57221e-18	1.28451e-33	0.0043807	0.000814083	chr17	77783551	77784110	chr17_77783551_77784110	560	3	5.98571e-13	0.000300909	3.20555e-05	6.23801e-06	0.000667662	0.000328229
SNORA69	SNORA69	chr17	80271578	80271693	chr17_80271578_80271693	116	3	9.14719e-23	1.05439e-14	4.52484e-10	6.72064e-15	0.00203281	0.00128879	chr17	35060451	35060679	chr17_35060451_35060679	229	3	8.90824e-13	1.33307e-05	1.28514e-05	4.089e-06	0.00216258	0.00141697
SNORA69	SNORA69	chr17	80271578	80271693	chr17_80271578_80271693	116	3	9.14719e-23	1.05439e-14	4.52484e-10	6.72064e-15	0.00203281	0.00128879	chr17	72919704	72920187	chr17_72919704_72920187	484	3	3.75051e-12	0.000701176	0.000442484	0.000341723	0.0010281	0.000843379
SNORA69	SNORA69	chr17	80271578	80271693	chr17_80271578_80271693	116	3	9.14719e-23	1.05439e-14	4.52484e-10	6.72064e-15	0.00203281	0.00128879	chr17	77783551	77784110	chr17_77783551_77784110	560	3	5.98571e-13	0.000300909	3.20555e-05	6.23801e-06	0.000667662	0.000328229
SNORD36, SNORD37	SNORD36	chr13	41055185	41056288	chr13_41055185_41056288	1104	4	1.05563e-52	1.33926e-14	9.48032e-15	8.48768e-24	0.00265383	0.000488333	chr13	53424812	53425257	chr13_53424812_53425257	446	2	8.48653e-13	0.00135367	0.00579132	0.00193353	0.000819326	0.00074089
SNORD36	SNORD36	chr13	95357638	95360542	chr13_95357638_95360542	2905	18	3.41228e-48	1.53553e-14	5.24447e-16	1.50501e-26	0.0013629	0.000194967	chr13	112720927	112721425	chr13_112720927_112721425	499	3	5.77784e-13	0.0251202	0.0449875	0.0329645	0.00142367	0.00101572
SNORA69	SNORA69	chr17	80260329	80261212	chr17_80260329_80261212	884	4	5.18377e-33	1.75496e-14	2.20978e-13	3.40161e-17	0.00226333	0.000922245	chr17	35060451	35060679	chr17_35060451_35060679	229	3	8.90824e-13	1.33307e-05	1.28514e-05	4.089e-06	0.00216258	0.00141697
SNORA69	SNORA69	chr17	80260329	80261212	chr17_80260329_80261212	884	4	5.18377e-33	1.75496e-14	2.20978e-13	3.40161e-17	0.00226333	0.000922245	chr17	72919704	72920187	chr17_72919704_72920187	484	3	3.75051e-12	0.000701176	0.000442484	0.000341723	0.0010281	0.000843379
SNORA69	SNORA69	chr17	80260329	80261212	chr17_80260329_80261212	884	4	5.18377e-33	1.75496e-14	2.20978e-13	3.40161e-17	0.00226333	0.000922245	chr17	77783551	77784110	chr17_77783551_77784110	560	3	5.98571e-13	0.000300909	3.20555e-05	6.23801e-06	0.000667662	0.000328229
SNORA69	SNORA69	chr17	76254129	76254353	chr17_76254129_76254353	225	2	5.15079e-22	2.09893e-14	3.73695e-08	7.25418e-14	0.0021138	0.001803	chr17	35060451	35060679	chr17_35060451_35060679	229	3	8.90824e-13	1.33307e-05	1.28514e-05	4.089e-06	0.00216258	0.00141697
SNORA69	SNORA69	chr17	76254129	76254353	chr17_76254129_76254353	225	2	5.15079e-22	2.09893e-14	3.73695e-08	7.25418e-14	0.0021138	0.001803	chr17	72919704	72920187	chr17_72919704_72920187	484	3	3.75051e-12	0.000701176	0.000442484	0.000341723	0.0010281	0.000843379
SNORA69	SNORA69	chr17	76254129	76254353	chr17_76254129_76254353	225	2	5.15079e-22	2.09893e-14	3.73695e-08	7.25418e-14	0.0021138	0.001803	chr17	77783551	77784110	chr17_77783551_77784110	560	3	5.98571e-13	0.000300909	3.20555e-05	6.23801e-06	0.000667662	0.000328229
CRISPLD2	CRISPLD2	chr16	84860871	84860918	chr16_84860871_84860918	48	2	7.70323e-21	2.86595e-14	1.09117e-09	5.61551e-14	0.00330155	0.00248353	chr16	84853380	84853871	chr16_84853380_84853871	492	5	1.43918e-12	0.00132161	0.000310076	0.000121527	0.00136337	0.0006955
snoZ6, SNORA27, SNORA68, RPS23P5, SNORA57, 7SK, OTP, SNORD45	snoZ6	chr5	76928406	76929064	chr5_76928406_76929064	659	4	7.9004e-50	3.74803e-14	4.09183e-17	4.75772e-22	0.00264004	0.000900875	chr5	76926079	76926752	chr5_76926079_76926752	674	4	4.79854e-21	3.00205e-07	1.61194e-06	5.35936e-08	0.00203406	0.000935838
LSP1	LSP1	chr11	10750074	10750973	chr11_10750074_10750973	900	3	6.04124e-39	3.91255e-14	3.10201e-14	2.58481e-19	0.00290353	0.000993774	chr11	20184487	20184718	chr11_20184487_20184718	232	3	8.37117e-12	0.0104245	0.0318836	0.0116752	0.00147183	0.00102292
snoU13, Y_RNA, SCARNA16, U1, SCARNA18, SCARNA24, SNORD112, SNORA62, SNORA63, SNORD46, FOXD2, SNORA2, SNORD81, U3, SNORA51, SNORA25, SCARNA20, SNORA67, U6, SNORA70, SNORA77, SNORA26, U8, SCARNA11, SNORA31, SNORA42, SNORA40, SNORD64, ACA64, snoU109, SNORD60, SNORD116	snoU13	chr1	47901632	47903385	chr1_47901632_47903385	1754	11	3.92019e-99	5.0512e-14	5.76027e-18	9.92383e-35	0.00135868	0.000429255	chr1	47903801	47904171	chr1_47903801_47904171	371	2	6.16111e-13	1.39196e-06	0.000405057	3.41189e-06	0.000483477	0.000439301
GATA4, SNORA7	GATA4	chr8	11616798	11617305	chr8_11616798_11617305	508	3	2.1923e-19	5.16481e-14	2.06725e-07	2.25916e-13	-0.00145465	-0.00138398	chr8	11561361	11562367	chr8_11561361_11562367	1007	11	7.09554e-15	0.00939909	0.0590523	0.0123738	0.00119297	0.000585913
SNORD36	SNORD36	chr13	113119625	113120234	chr13_113119625_113120234	610	6	3.45157e-32	5.1709e-14	3.61039e-10	3.74872e-17	-0.00185598	-0.000989655	chr13	112720927	112721425	chr13_112720927_112721425	499	3	5.77784e-13	0.0251202	0.0449875	0.0329645	0.00142367	0.00101572
SNORA69	SNORA69	chr17	77833495	77834299	chr17_77833495_77834299	805	4	3.36999e-17	5.17197e-14	1.14339e-05	1.63494e-13	0.00355694	0.00239126	chr17	35060451	35060679	chr17_35060451_35060679	229	3	8.90824e-13	1.33307e-05	1.28514e-05	4.089e-06	0.00216258	0.00141697
SNORA69	SNORA69	chr17	77833495	77834299	chr17_77833495_77834299	805	4	3.36999e-17	5.17197e-14	1.14339e-05	1.63494e-13	0.00355694	0.00239126	chr17	72919704	72920187	chr17_72919704_72920187	484	3	3.75051e-12	0.000701176	0.000442484	0.000341723	0.0010281	0.000843379
SNORA69	SNORA69	chr17	77833495	77834299	chr17_77833495_77834299	805	4	3.36999e-17	5.17197e-14	1.14339e-05	1.63494e-13	0.00355694	0.00239126	chr17	77783551	77784110	chr17_77783551_77784110	560	3	5.98571e-13	0.000300909	3.20555e-05	6.23801e-06	0.000667662	0.000328229
FEZF1-AS1, FEZF1	FEZF1	chr7	121946018	121947425	chr7_121946018_121947425	1408	7	1.14857e-71	6.10822e-14	2.51289e-17	9.47603e-29	0.00245533	0.000593962	chr7	121943705	121945445	chr7_121943705_121945445	1741	14	6.29965e-22	7.88112e-05	0.00605429	5.69515e-05	0.00235299	0.000729563
SNORD74, SNORD50, SNORA11, NKX6-1, snoU2_19, SNORD65	SNORD74	chr4	85416865	85419151	chr4_85416865_85419151	2287	12	4.8963e-53	1.18504e-13	2.10572e-12	1.79113e-23	0.00256739	0.000548227	chr4	85418265	85420311	chr4_85418265_85420311	2047	13	8.3917e-30	1.02393e-06	2.64278e-05	6.60796e-10	0.00228368	0.0006695
snoU13, Y_RNA, SCARNA16, U1, SCARNA18, SCARNA24, SNORD112, SNORA62, SNORA63, SNORD46, FOXE3, SNORA2, SNORD81, U3, SNORA51, SNORA25, SCARNA20, SNORA67, U6, SNORA70, SNORA77, SNORA26, U8, SCARNA11, SNORA31, SNORA42, SNORA40, SNORD64, ACA64, snoU109, SNORD60, SNORD116	snoU13	chr1	47880440	47882322	chr1_47880440_47882322	1883	6	1.57281e-34	1.7101e-13	1.0376e-10	9.72216e-17	0.00214049	0.000605254	chr1	47882265	47882936	chr1_47882265_47882936	672	6	2.81309e-14	2.41354e-05	0.0121067	6.60505e-05	0.00178515	0.000969975
snoU13, Y_RNA, SCARNA16, SCARNA21, SNORD112, SNORA62, SNORA2, U3, SNORA51, SCARNA20, SNORA67, SNORA70, SNORA77, SNORA26, U8, SCARNA11, SNORA31, SNORA42, SNORA40, snoU109, SNORD60	snoU13	chr1	10695686	10696066	chr1_10695686_10696066	381	2	1.01316e-18	1.78879e-13	6.94904e-08	5.76694e-13	-0.00176052	-0.00134104	chr1	11919095	11919699	chr1_11919095_11919699	605	7	3.54165e-14	0.000970239	0.00258365	0.000422394	0.00139384	0.000625622
SNORA69	SNORA69	chr17	78417789	78418426	chr17_78417789_78418426	638	7	9.03082e-29	1.87982e-13	1.73081e-10	1.39974e-17	0.00203689	0.000957608	chr17	35060451	35060679	chr17_35060451_35060679	229	3	8.90824e-13	1.33307e-05	1.28514e-05	4.089e-06	0.00216258	0.00141697
SNORA69	SNORA69	chr17	78417789	78418426	chr17_78417789_78418426	638	7	9.03082e-29	1.87982e-13	1.73081e-10	1.39974e-17	0.00203689	0.000957608	chr17	72919704	72920187	chr17_72919704_72920187	484	3	3.75051e-12	0.000701176	0.000442484	0.000341723	0.0010281	0.000843379
SNORA69	SNORA69	chr17	78417789	78418426	chr17_78417789_78418426	638	7	9.03082e-29	1.87982e-13	1.73081e-10	1.39974e-17	0.00203689	0.000957608	chr17	77783551	77784110	chr17_77783551_77784110	560	3	5.98571e-13	0.000300909	3.20555e-05	6.23801e-06	0.000667662	0.000328229
SNORA69	SNORA69	chr17	25707428	25708208	chr17_25707428_25708208	781	5	9.68464e-48	2.00797e-13	7.00016e-16	5.5609e-20	-0.00245871	-0.000834119	chr17	35060451	35060679	chr17_35060451_35060679	229	3	8.90824e-13	1.33307e-05	1.28514e-05	4.089e-06	0.00216258	0.00141697
SNORA69	SNORA69	chr17	25707428	25708208	chr17_25707428_25708208	781	5	9.68464e-48	2.00797e-13	7.00016e-16	5.5609e-20	-0.00245871	-0.000834119	chr17	72919704	72920187	chr17_72919704_72920187	484	3	3.75051e-12	0.000701176	0.000442484	0.000341723	0.0010281	0.000843379
SNORA69	SNORA69	chr17	25707428	25708208	chr17_25707428_25708208	781	5	9.68464e-48	2.00797e-13	7.00016e-16	5.5609e-20	-0.00245871	-0.000834119	chr17	77783551	77784110	chr17_77783551_77784110	560	3	5.98571e-13	0.000300909	3.20555e-05	6.23801e-06	0.000667662	0.000328229
CCDC33	CCDC33	chr15	74537514	74538030	chr15_74537514_74538030	517	5	6.88843e-28	3.36154e-13	5.8622e-09	8.14084e-17	0.00121041	0.000574989	chr15	74557527	74557537	chr15_74557527_74557537	11	2	1.64112e-15	1.99334e-08	3.30603e-06	3.23809e-08	0.00380373	0.00344063
snoU13, Y_RNA, SCARNA16, U1, SCARNA18, SCARNA24, SNORD112, SNORA62, SNORA63, SNORD46, SNORA2, SNORD81, U3, SNORA51, SNORA25, SCARNA20, SNORA67, U6, SNORA70, SNORA77, SNORA26, U8, SCARNA11, SNORA31, SNORA42, SNORA40, SNORD64, ACA64, snoU109, SNORD60, SNORD116	snoU13	chr1	48058390	48059354	chr1_48058390_48059354	965	6	2.59689e-90	4.05215e-13	4.21652e-21	1.45691e-28	0.00404419	0.00121533	chr1	47910239	47910456	chr1_47910239_47910456	218	2	8.11997e-12	0.00471268	0.0303093	0.0083994	0.00128211	0.00109306
TFAP2A, SNORA20	TFAP2A	chr6	10404363	10405499	chr6_10404363_10405499	1137	5	1.37388e-59	6.19321e-13	8.98384e-16	5.73012e-23	0.00375095	0.00128845	chr6	10404084	10404967	chr6_10404084_10404967	884	4	6.41361e-23	5.82452e-10	1.25033e-07	1.24683e-10	0.00148425	0.000919126
SNORA69, KCNJ12	SNORA69	chr17	21300735	21300791	chr17_21300735_21300791	57	3	1.41782e-17	7.37965e-13	3.17766e-07	1.83045e-12	0.00146099	0.00108214	chr17	21280740	21281163	chr17_21280740_21281163	424	4	5.0299e-12	0.00308651	0.0629943	0.00990071	0.00152253	0.0012583
LSP1	LSP1	chr11	2308362	2309287	chr11_2308362_2309287	926	5	5.32315e-23	7.58347e-13	3.87535e-09	1.09958e-14	-0.00141524	-0.000134315	chr11	20184487	20184718	chr11_20184487_20184718	232	3	8.37117e-12	0.0104245	0.0318836	0.0116752	0.00147183	0.00102292
HOXD11, SNORA4, SNORD11, SNORD51, SNORA41, SCARNA6, SNORD39, SNORA75, ACA59, SNORA48, SNORA43, SNORA1, Vault	HOXD11	chr2	176968052	176970064	chr2_176968052_176970064	2013	8	7.77252e-20	7.58618e-13	3.41366e-07	1.38519e-14	0.0016364	0.000344531	chr2	176971304	176972812	chr2_176971304_176972812	1509	12	1.31271e-25	2.64626e-06	0.000562223	9.55985e-07	0.0030461	0.00124682
AC018470.4, SNORA4, SNORD11, SNORD51, SNORA41, SCARNA6, SNORD39, SNORA75, ACA59, SNORA48, SNORA43, SNORA1, Vault	AC018470.4	chr2	175192013	175194079	chr2_175192013_175194079	2067	11	1.59888e-41	7.82995e-13	5.15759e-08	1.20712e-19	0.0014269	0.000296068	chr2	175192666	175194079	chr2_175192666_175194079	1414	9	2.62387e-21	7.40061e-06	0.00139618	1.37016e-06	0.00177682	0.00109039
SNORA69	SNORA69	chr17	76164111	76164396	chr17_76164111_76164396	286	4	7.22311e-21	8.953e-13	4.15615e-07	1.83075e-13	-0.00193541	-0.00118557	chr17	35060451	35060679	chr17_35060451_35060679	229	3	8.90824e-13	1.33307e-05	1.28514e-05	4.089e-06	0.00216258	0.00141697
SNORA69	SNORA69	chr17	76164111	76164396	chr17_76164111_76164396	286	4	7.22311e-21	8.953e-13	4.15615e-07	1.83075e-13	-0.00193541	-0.00118557	chr17	72919704	72920187	chr17_72919704_72920187	484	3	3.75051e-12	0.000701176	0.000442484	0.000341723	0.0010281	0.000843379
SNORA69	SNORA69	chr17	76164111	76164396	chr17_76164111_76164396	286	4	7.22311e-21	8.953e-13	4.15615e-07	1.83075e-13	-0.00193541	-0.00118557	chr17	77783551	77784110	chr17_77783551_77784110	560	3	5.98571e-13	0.000300909	3.20555e-05	6.23801e-06	0.000667662	0.000328229
SNORD36	SNORD36	chr13	114059522	114059651	chr13_114059522_114059651	130	2	2.26082e-18	1.12393e-12	1.44135e-07	3.44073e-12	0.00137972	0.00129016	chr13	112720927	112721425	chr13_112720927_112721425	499	3	5.77784e-13	0.0251202	0.0449875	0.0329645	0.00142367	0.00101572
SNORA69	SNORA69	chr17	81016185	81016852	chr17_81016185_81016852	668	3	1.73613e-39	1.25599e-12	2.06834e-14	2.68921e-17	0.00177004	0.00026927	chr17	35060451	35060679	chr17_35060451_35060679	229	3	8.90824e-13	1.33307e-05	1.28514e-05	4.089e-06	0.00216258	0.00141697
SNORA69	SNORA69	chr17	81016185	81016852	chr17_81016185_81016852	668	3	1.73613e-39	1.25599e-12	2.06834e-14	2.68921e-17	0.00177004	0.00026927	chr17	72919704	72920187	chr17_72919704_72920187	484	3	3.75051e-12	0.000701176	0.000442484	0.000341723	0.0010281	0.000843379
SNORA69	SNORA69	chr17	81016185	81016852	chr17_81016185_81016852	668	3	1.73613e-39	1.25599e-12	2.06834e-14	2.68921e-17	0.00177004	0.00026927	chr17	77783551	77784110	chr17_77783551_77784110	560	3	5.98571e-13	0.000300909	3.20555e-05	6.23801e-06	0.000667662	0.000328229
SNORA69	SNORA69	chr17	38666816	38667429	chr17_38666816_38667429	614	2	5.79346e-65	1.35869e-12	4.97817e-21	3.90481e-20	0.00291984	0.00132297	chr17	35060451	35060679	chr17_35060451_35060679	229	3	8.90824e-13	1.33307e-05	1.28514e-05	4.089e-06	0.00216258	0.00141697
SNORA69	SNORA69	chr17	38666816	38667429	chr17_38666816_38667429	614	2	5.79346e-65	1.35869e-12	4.97817e-21	3.90481e-20	0.00291984	0.00132297	chr17	72919704	72920187	chr17_72919704_72920187	484	3	3.75051e-12	0.000701176	0.000442484	0.000341723	0.0010281	0.000843379
SNORA69	SNORA69	chr17	38666816	38667429	chr17_38666816_38667429	614	2	5.79346e-65	1.35869e-12	4.97817e-21	3.90481e-20	0.00291984	0.00132297	chr17	77783551	77784110	chr17_77783551_77784110	560	3	5.98571e-13	0.000300909	3.20555e-05	6.23801e-06	0.000667662	0.000328229
SNORA38, SNORA8, SNORD28, SNORA20	SNORA38	chr6	99275305	99277015	chr6_99275305_99277015	1711	12	6.71576e-38	1.47157e-12	4.68037e-13	5.32752e-24	0.00139718	0.000308026	chr6	100050506	100051841	chr6_100050506_100051841	1336	11	1.76331e-19	0.00013563	0.0231118	4.12642e-05	0.00113676	0.000571765
SNORA38, SNORA8, SNORD28, SNORA20	SNORA38	chr6	99275305	99277015	chr6_99275305_99277015	1711	12	6.71576e-38	1.47157e-12	4.68037e-13	5.32752e-24	0.00139718	0.000308026	chr6	100912906	100913592	chr6_100912906_100913592	687	6	1.80809e-27	4.28586e-09	3.88355e-06	9.55214e-10	0.00153584	0.00100345
SNORA38, SNORA8, SNORD28, SNORA20	SNORA38	chr6	99275305	99277015	chr6_99275305_99277015	1711	12	6.71576e-38	1.47157e-12	4.68037e-13	5.32752e-24	0.00139718	0.000308026	chr6	105388668	105389599	chr6_105388668_105389599	932	6	5.95507e-16	1.21248e-07	0.000447273	1.48279e-07	0.00466408	0.00225804
SNORD36, SNORD37	SNORD36	chr13	49107423	49108353	chr13_49107423_49108353	931	5	5.84659e-44	1.68405e-12	9.26029e-11	4.05023e-19	0.0034193	0.0013413	chr13	53424812	53425257	chr13_53424812_53425257	446	2	8.48653e-13	0.00135367	0.00579132	0.00193353	0.000819326	0.00074089
SNORA69	SNORA69	chr17	77784595	77787315	chr17_77784595_77787315	2721	11	1.86356e-121	2.76741e-12	7.21933e-20	7.63952e-34	0.00368378	0.000560743	chr17	35060451	35060679	chr17_35060451_35060679	229	3	8.90824e-13	1.33307e-05	1.28514e-05	4.089e-06	0.00216258	0.00141697
SNORA69	SNORA69	chr17	77784595	77787315	chr17_77784595_77787315	2721	11	1.86356e-121	2.76741e-12	7.21933e-20	7.63952e-34	0.00368378	0.000560743	chr17	72919704	72920187	chr17_72919704_72920187	484	3	3.75051e-12	0.000701176	0.000442484	0.000341723	0.0010281	0.000843379
SNORA69	SNORA69	chr17	77784595	77787315	chr17_77784595_77787315	2721	11	1.86356e-121	2.76741e-12	7.21933e-20	7.63952e-34	0.00368378	0.000560743	chr17	77783551	77784110	chr17_77783551_77784110	560	3	5.98571e-13	0.000300909	3.20555e-05	6.23801e-06	0.000667662	0.000328229
SNORD36, SNORD37	SNORD36	chr13	41111493	41111800	chr13_41111493_41111800	308	2	1.59466e-36	3.22607e-12	2.09646e-16	2.84579e-16	0.00251484	0.00106967	chr13	53424812	53425257	chr13_53424812_53425257	446	2	8.48653e-13	0.00135367	0.00579132	0.00193353	0.000819326	0.00074089
SNORA69	SNORA69	chr17	39662206	39662980	chr17_39662206_39662980	775	3	2.60284e-19	3.77071e-12	4.72216e-07	1.71643e-12	-0.00116515	-0.000986856	chr17	35060451	35060679	chr17_35060451_35060679	229	3	8.90824e-13	1.33307e-05	1.28514e-05	4.089e-06	0.00216258	0.00141697
SNORA69	SNORA69	chr17	39662206	39662980	chr17_39662206_39662980	775	3	2.60284e-19	3.77071e-12	4.72216e-07	1.71643e-12	-0.00116515	-0.000986856	chr17	72919704	72920187	chr17_72919704_72920187	484	3	3.75051e-12	0.000701176	0.000442484	0.000341723	0.0010281	0.000843379
SNORA69	SNORA69	chr17	39662206	39662980	chr17_39662206_39662980	775	3	2.60284e-19	3.77071e-12	4.72216e-07	1.71643e-12	-0.00116515	-0.000986856	chr17	77783551	77784110	chr17_77783551_77784110	560	3	5.98571e-13	0.000300909	3.20555e-05	6.23801e-06	0.000667662	0.000328229
SNORD36	SNORD36	chr13	112720171	112721425	chr13_112720171_112721425	1255	9	1.56929e-66	4.14233e-12	1.51768e-14	1.26361e-25	0.000681894	0.000143745	chr13	112720927	112721425	chr13_112720927_112721425	499	3	5.77784e-13	0.0251202	0.0449875	0.0329645	0.00142367	0.00101572
SNORD36	SNORD36	chr13	112074876	112074910	chr13_112074876_112074910	35	2	4.85344e-22	4.17776e-12	8.48725e-11	1.0348e-12	-0.00259498	-0.00152446	chr13	112720927	112721425	chr13_112720927_112721425	499	3	5.77784e-13	0.0251202	0.0449875	0.0329645	0.00142367	0.00101572
SYT7, SNORD43	SYT7	chr11	61309985	61310204	chr11_61309985_61310204	220	3	1.08614e-19	4.72429e-12	1.08705e-09	1.18941e-12	0.000913884	0.000706069	chr11	61334859	61335600	chr11_61334859_61335600	742	6	3.89592e-14	0.000433297	0.00294757	5.56565e-05	0.00222118	0.00118648
SNORD36	SNORD36	chr13	111217366	111217611	chr13_111217366_111217611	246	2	1.37851e-17	6.05218e-12	6.12636e-09	7.40051e-12	-0.0011766	-0.000161773	chr13	112720927	112721425	chr13_112720927_112721425	499	3	5.77784e-13	0.0251202	0.0449875	0.0329645	0.00142367	0.00101572
SNORA22, SNORA15, COBL	SNORA22	chr7	51381086	51381867	chr7_51381086_51381867	782	2	7.90037e-14	6.47656e-12	2.69283e-07	1.85802e-11	-0.0021747	-6.82776e-05	chr7	51384371	51384676	chr7_51384371_51384676	306	7	1.51847e-11	0.0152101	0.0291131	0.0219164	0.000649645	0.000429428
TENM4	TENM4	chr11	78900687	78900896	chr11_78900687_78900896	210	2	9.79219e-16	7.61878e-12	7.14754e-07	2.3978e-11	-0.00142175	-0.00132793	chr11	79151719	79152112	chr11_79151719_79152112	394	7	1.10371e-13	0.0051832	0.00547467	0.00132716	0.00095253	0.000481009
SNORD36	SNORD36	chr13	114065008	114066074	chr13_114065008_114066074	1067	4	5.31924e-18	9.0077e-12	1.42793e-06	7.49988e-12	-0.00203174	-0.000738013	chr13	112720927	112721425	chr13_112720927_112721425	499	3	5.77784e-13	0.0251202	0.0449875	0.0329645	0.00142367	0.00101572
IL17REL	IL17REL	chr22	50451054	50451414	chr22_50451054_50451414	361	5	5.82414e-30	1.27442e-11	3.06382e-12	5.15844e-16	0.00177961	0.000646874	chr22	50438356	50438363	chr22_50438356_50438363	8	2	1.55772e-11	6.0288e-05	0.00217678	0.000123683	0.0021089	0.00205554
SNORD36	SNORD36	chr13	113274482	113274535	chr13_113274482_113274535	54	3	1.99661e-15	1.42583e-11	5.31462e-06	3.7063e-11	-0.00146073	-0.00136255	chr13	112720927	112721425	chr13_112720927_112721425	499	3	5.77784e-13	0.0251202	0.0449875	0.0329645	0.00142367	0.00101572
SNORA69	SNORA69	chr17	55213563	55213656	chr17_55213563_55213656	94	2	2.20235e-17	2.02339e-11	1.70878e-09	1.16233e-11	-0.00157095	-0.00127567	chr17	35060451	35060679	chr17_35060451_35060679	229	3	8.90824e-13	1.33307e-05	1.28514e-05	4.089e-06	0.00216258	0.00141697
SNORA69	SNORA69	chr17	55213563	55213656	chr17_55213563_55213656	94	2	2.20235e-17	2.02339e-11	1.70878e-09	1.16233e-11	-0.00157095	-0.00127567	chr17	72919704	72920187	chr17_72919704_72920187	484	3	3.75051e-12	0.000701176	0.000442484	0.000341723	0.0010281	0.000843379
SNORA69	SNORA69	chr17	55213563	55213656	chr17_55213563_55213656	94	2	2.20235e-17	2.02339e-11	1.70878e-09	1.16233e-11	-0.00157095	-0.00127567	chr17	77783551	77784110	chr17_77783551_77784110	560	3	5.98571e-13	0.000300909	3.20555e-05	6.23801e-06	0.000667662	0.000328229
snoU13, Y_RNA, SCARNA16, SCARNA21, U1, SCARNA17, SCARNA18, SNORD112, SNORA62, SNORA63, SNORD46, SNORA2, SNORD81, U3, SNORA51, SCARNA20, SNORA67, U6, SNORA70, SNORA77, SNORA26, U8, SCARNA11, SNORA31, SNORA42, SNORA40, SNORD64, ACA64, snoU109, SNORD60	snoU13	chr1	26494529	26495874	chr1_26494529_26495874	1346	5	2.09563e-28	2.13228e-11	3.36757e-08	5.18378e-14	-0.00262477	-0.000879368	chr1	26735245	26736154	chr1_26735245_26736154	910	10	1.46723e-20	3.52016e-05	0.0165931	1.96531e-05	0.00195578	0.000790606
snoZ6, SNORA27, SNORA68, SNORA57, 7SK, MCC, SNORD45, SNORD95	snoZ6	chr5	112824172	112825132	chr5_112824172_112825132	961	10	4.17607e-41	2.34773e-11	1.42971e-07	7.28775e-22	-0.0021065	-0.000982039	chr5	112823756	112824172	chr5_112823756_112824172	417	2	7.10073e-13	0.000229816	0.00647697	0.000481793	0.00115785	0.00085342
LSP1, ASCL2	LSP1	chr11	2292000	2293665	chr11_2292000_2293665	1666	39	5.10073e-50	2.57572e-11	1.59173e-07	2.26718e-23	0.00142361	0.000307501	chr11	2290953	2292914	chr11_2290953_2292914	1962	29	6.42311e-34	0.000207514	0.000136512	1.25866e-05	0.00183908	0.000850234
SNORD74, SNORD50, SNORA11, snoU2_19, SNORD65	SNORD74	chr4	94755520	94756895	chr4_94755520_94756895	1376	4	7.34164e-15	2.65697e-11	6.06579e-08	4.04094e-12	0.00103649	0.000366591	chr4	94749496	94749609	chr4_94749496_94749609	114	3	8.01431e-12	0.035886	0.0646947	0.0447508	0.000860844	0.000806866
SNORA69	SNORA69	chr17	63225111	63225392	chr17_63225111_63225392	282	2	3.58527e-17	3.05631e-11	4.49983e-09	2.30529e-11	-0.00536049	-0.0033646	chr17	35060451	35060679	chr17_35060451_35060679	229	3	8.90824e-13	1.33307e-05	1.28514e-05	4.089e-06	0.00216258	0.00141697
SNORA69	SNORA69	chr17	63225111	63225392	chr17_63225111_63225392	282	2	3.58527e-17	3.05631e-11	4.49983e-09	2.30529e-11	-0.00536049	-0.0033646	chr17	72919704	72920187	chr17_72919704_72920187	484	3	3.75051e-12	0.000701176	0.000442484	0.000341723	0.0010281	0.000843379
SNORA69	SNORA69	chr17	63225111	63225392	chr17_63225111_63225392	282	2	3.58527e-17	3.05631e-11	4.49983e-09	2.30529e-11	-0.00536049	-0.0033646	chr17	77783551	77784110	chr17_77783551_77784110	560	3	5.98571e-13	0.000300909	3.20555e-05	6.23801e-06	0.000667662	0.000328229
SNORD36, SNORD37	SNORD36	chr13	44989900	44991018	chr13_44989900_44991018	1119	4	2.15778e-28	3.56336e-11	3.43803e-12	1.44283e-14	0.000806758	0.000483246	chr13	53424812	53425257	chr13_53424812_53425257	446	2	8.48653e-13	0.00135367	0.00579132	0.00193353	0.000819326	0.00074089
RCN1, PAX6	RCN1	chr11	31836334	31838674	chr11_31836334_31838674	2341	10	1.97797e-31	3.91013e-11	1.77125e-11	1.49696e-18	0.000623168	0.000124946	chr11	31838674	31839947	chr11_31838674_31839947	1274	10	2.18028e-22	4.53987e-08	0.00446138	2.54689e-07	0.00254566	0.00111495
LSP1	LSP1	chr11	8385712	8385767	chr11_8385712_8385767	56	2	1.8245e-14	4.39264e-11	2.22883e-06	1.36868e-10	-0.00199107	-0.00164121	chr11	20184487	20184718	chr11_20184487_20184718	232	3	8.37117e-12	0.0104245	0.0318836	0.0116752	0.00147183	0.00102292
SNORA38, SNORA8, SNORD28, SNORA20	SNORA38	chr6	100581833	100582403	chr6_100581833_100582403	571	2	7.13104e-14	5.0016e-11	1.36939e-06	1.47739e-10	-0.00135337	-0.00131796	chr6	100050506	100051841	chr6_100050506_100051841	1336	11	1.76331e-19	0.00013563	0.0231118	4.12642e-05	0.00113676	0.000571765
SNORA38, SNORA8, SNORD28, SNORA20	SNORA38	chr6	100581833	100582403	chr6_100581833_100582403	571	2	7.13104e-14	5.0016e-11	1.36939e-06	1.47739e-10	-0.00135337	-0.00131796	chr6	100912906	100913592	chr6_100912906_100913592	687	6	1.80809e-27	4.28586e-09	3.88355e-06	9.55214e-10	0.00153584	0.00100345
SNORA38, SNORA8, SNORD28, SNORA20	SNORA38	chr6	100581833	100582403	chr6_100581833_100582403	571	2	7.13104e-14	5.0016e-11	1.36939e-06	1.47739e-10	-0.00135337	-0.00131796	chr6	105388668	105389599	chr6_105388668_105389599	932	6	5.95507e-16	1.21248e-07	0.000447273	1.48279e-07	0.00466408	0.00225804
LSP1	LSP1	chr11	12620869	12621248	chr11_12620869_12621248	380	2	2.52665e-19	5.19991e-11	3.15661e-10	1.03584e-11	-0.00234168	-0.000735678	chr11	20184487	20184718	chr11_20184487_20184718	232	3	8.37117e-12	0.0104245	0.0318836	0.0116752	0.00147183	0.00102292
SNORA81, SNORD66, SNORD2, SNORA18, U4	SNORA81	chr3	157812018	157813810	chr3_157812018_157813810	1793	10	2.53643e-13	5.28551e-11	0.00134405	1.09803e-10	0.00159153	0.000598325	chr3	157812226	157812763	chr3_157812226_157812763	538	3	4.13276e-17	2.23573e-05	0.00040082	3.12761e-05	0.00209096	0.00163643
SNORA15, SP8	SNORA15	chr7	20825394	20827825	chr7_20825394_20827825	2432	14	2.15145e-78	5.75171e-11	2.2031e-19	8.79323e-25	0.00141535	0.000223154	chr7	20824556	20826345	chr7_20824556_20826345	1790	15	1.31825e-14	0.00101711	0.043834	0.000685848	0.00190755	0.000878234
SNORD36	SNORD36	chr13	107686974	107687552	chr13_107686974_107687552	579	5	8.64856e-20	6.01253e-11	4.10079e-06	7.17875e-13	0.00198491	0.0013352	chr13	112720927	112721425	chr13_112720927_112721425	499	3	5.77784e-13	0.0251202	0.0449875	0.0329645	0.00142367	0.00101572
SNORA69	SNORA69	chr17	47983346	47983990	chr17_47983346_47983990	645	2	1.93665e-36	7.13655e-11	1.51303e-15	3.92129e-15	-0.002484	-0.000989672	chr17	35060451	35060679	chr17_35060451_35060679	229	3	8.90824e-13	1.33307e-05	1.28514e-05	4.089e-06	0.00216258	0.00141697
SNORA69	SNORA69	chr17	47983346	47983990	chr17_47983346_47983990	645	2	1.93665e-36	7.13655e-11	1.51303e-15	3.92129e-15	-0.002484	-0.000989672	chr17	72919704	72920187	chr17_72919704_72920187	484	3	3.75051e-12	0.000701176	0.000442484	0.000341723	0.0010281	0.000843379
SNORA69	SNORA69	chr17	47983346	47983990	chr17_47983346_47983990	645	2	1.93665e-36	7.13655e-11	1.51303e-15	3.92129e-15	-0.002484	-0.000989672	chr17	77783551	77784110	chr17_77783551_77784110	560	3	5.98571e-13	0.000300909	3.20555e-05	6.23801e-06	0.000667662	0.000328229
TLX3, SNORA57, SNORD95	TLX3	chr5	170734312	170738274	chr5_170734312_170738274	3963	19	1.90597e-59	7.3362e-11	4.60047e-17	2.75243e-33	0.00190826	0.000360405	chr5	170735754	170736572	chr5_170735754_170736572	819	10	2.40284e-12	0.0102375	0.117562	0.0341187	0.00200143	0.00085861
HOXD9, SNORA4, SNORD11, SNORD51, SNORA41, SCARNA6, SNORD39, SNORA75, ACA59, SNORA48, HOXD-AS2, SNORA43, SNORA1, Vault	HOXD9	chr2	176985953	176989586	chr2_176985953_176989586	3634	23	4.03998e-78	7.5009e-11	2.59421e-18	4.41548e-35	0.00109892	0.000151098	chr2	176986956	176987918	chr2_176986956_176987918	963	9	6.46034e-21	0.000160797	0.000105213	2.88145e-05	0.00224659	0.00120101
SNORA73, SNORA64, SNORD75, SNORA74, snR65, 5S_rRNA, SCARNA6, SNORD39, SNORD18, SNORA36, SNORA75, SNORA48, SNORD56, SNORA43, SNORA1, Vault	SNORA73	chr2	43271223	43271691	chr2_43271223_43271691	469	2	1.50155e-19	7.97565e-11	3.36571e-10	1.40921e-11	0.00285565	0.00170775	chr2	43020129	43020264	chr2_43020129_43020264	136	3	1.49848e-11	0.00652806	0.0156706	0.00886975	0.00177091	0.000805603
SNORD36	SNORD36	chr13	111718937	111719172	chr13_111718937_111719172	236	3	8.32229e-16	8.65203e-11	3.52675e-05	4.61771e-10	0.00170512	0.00158181	chr13	112720927	112721425	chr13_112720927_112721425	499	3	5.77784e-13	0.0251202	0.0449875	0.0329645	0.00142367	0.00101572
TFAP2A, SNORA20	TFAP2A	chr6	10398494	10399281	chr6_10398494_10399281	788	5	5.34364e-25	9.75845e-11	2.75947e-07	1.36471e-14	0.00311607	0.00121785	chr6	10404084	10404967	chr6_10404084_10404967	884	4	6.41361e-23	5.82452e-10	1.25033e-07	1.24683e-10	0.00148425	0.000919126
RP11-402J6.1, SNORA11, SNORD65	RP11	chr4	113441608	113442804	chr4_113441608_113442804	1197	10	4.13735e-39	1.051e-10	2.0584e-12	5.62878e-21	0.000585898	0.000163754	chr4	113445029	113445388	chr4_113445029_113445388	360	3	1.66803e-17	4.89293e-06	1.07122e-05	6.29418e-07	0.00139242	0.00095114
RP11-402J6.1, SNORA11, SNORD65	RP11	chr4	113441608	113442804	chr4_113441608_113442804	1197	10	4.13735e-39	1.051e-10	2.0584e-12	5.62878e-21	0.000585898	0.000163754	chr4	113441608	113442709	chr4_113441608_113442709	1102	8	1.87969e-21	9.51246e-05	9.81088e-08	4.31307e-07	0.00240027	0.000952685
U7, SNORD77, SNORA33, SNORA81, SNORD66, SNORD2, SNORD5, SNORD38, SNORD63, PTPRG-AS1, FEZF2, Metazoa_SRP, SNORA18	U7	chr3	62353312	62356323	chr3_62353312_62356323	3012	17	1.01908e-29	1.45791e-10	1.43766e-07	4.23836e-19	0.00100816	0.000137883	chr3	62354878	62355525	chr3_62354878_62355525	648	7	1.52801e-12	0.0133013	0.0544562	0.0195673	0.00237487	0.00113841
SNORA7, SFRP1	SNORA7	chr8	41165144	41165699	chr8_41165144_41165699	556	2	4.54022e-16	1.47153e-10	1.21433e-07	2.35889e-10	0.00173546	0.000951155	chr8	41166738	41167278	chr8_41166738_41167278	541	7	9.42748e-15	0.00114394	0.0332912	0.00386992	0.00159506	0.00101544
SNORA69	SNORA69	chr17	72527724	72528386	chr17_72527724_72528386	663	3	2.3229e-27	1.601e-10	2.38155e-12	1.13772e-13	-0.00201211	-0.00122171	chr17	35060451	35060679	chr17_35060451_35060679	229	3	8.90824e-13	1.33307e-05	1.28514e-05	4.089e-06	0.00216258	0.00141697
SNORA69	SNORA69	chr17	72527724	72528386	chr17_72527724_72528386	663	3	2.3229e-27	1.601e-10	2.38155e-12	1.13772e-13	-0.00201211	-0.00122171	chr17	72919704	72920187	chr17_72919704_72920187	484	3	3.75051e-12	0.000701176	0.000442484	0.000341723	0.0010281	0.000843379
SNORA69	SNORA69	chr17	72527724	72528386	chr17_72527724_72528386	663	3	2.3229e-27	1.601e-10	2.38155e-12	1.13772e-13	-0.00201211	-0.00122171	chr17	77783551	77784110	chr17_77783551_77784110	560	3	5.98571e-13	0.000300909	3.20555e-05	6.23801e-06	0.000667662	0.000328229
EMX2, EMX2OS	EMX2	chr10	119301464	119306659	chr10_119301464_119306659	5196	32	1.11059e-110	1.60452e-10	8.17647e-18	4.36249e-42	0.00203786	0.000218803	chr10	119301464	119302540	chr10_119301464_119302540	1077	12	4.78846e-14	0.0486276	0.021026	0.0113521	0.00124988	0.000549551
SNORD65	SNORD65	chr4	155511987	155512766	chr4_155511987_155512766	780	2	1.69252e-24	1.61157e-10	6.28337e-12	2.13914e-12	-0.00162873	-0.00089754	chr4	147557774	147558544	chr4_147557774_147558544	771	5	7.67906e-30	3.06944e-07	3.8564e-08	1.42195e-12	0.00301389	0.00222257
SNORD65	SNORD65	chr4	155511987	155512766	chr4_155511987_155512766	780	2	1.69252e-24	1.61157e-10	6.28337e-12	2.13914e-12	-0.00162873	-0.00089754	chr4	174443366	174443865	chr4_174443366_174443865	500	4	2.23518e-12	0.000740629	0.030307	0.00204937	0.00148324	0.00120957
SNORD36, SNORD37	SNORD36	chr13	41240923	41241867	chr13_41240923_41241867	945	4	4.14704e-38	1.7159e-10	2.19406e-13	1.67859e-17	0.00177793	0.000860208	chr13	53424812	53425257	chr13_53424812_53425257	446	2	8.48653e-13	0.00135367	0.00579132	0.00193353	0.000819326	0.00074089
SNORA69	SNORA69	chr17	46522464	46522513	chr17_46522464_46522513	50	2	1.6263e-13	1.92284e-10	2.93738e-06	5.57684e-10	0.00202426	0.00184759	chr17	35060451	35060679	chr17_35060451_35060679	229	3	8.90824e-13	1.33307e-05	1.28514e-05	4.089e-06	0.00216258	0.00141697
SNORA69	SNORA69	chr17	46522464	46522513	chr17_46522464_46522513	50	2	1.6263e-13	1.92284e-10	2.93738e-06	5.57684e-10	0.00202426	0.00184759	chr17	72919704	72920187	chr17_72919704_72920187	484	3	3.75051e-12	0.000701176	0.000442484	0.000341723	0.0010281	0.000843379
SNORA69	SNORA69	chr17	46522464	46522513	chr17_46522464_46522513	50	2	1.6263e-13	1.92284e-10	2.93738e-06	5.57684e-10	0.00202426	0.00184759	chr17	77783551	77784110	chr17_77783551_77784110	560	3	5.98571e-13	0.000300909	3.20555e-05	6.23801e-06	0.000667662	0.000328229
FEZF1-AS1, FEZF1	FEZF1	chr7	121939827	121944931	chr7_121939827_121944931	5105	24	1.65959e-58	2.03028e-10	5.19405e-16	4.9152e-23	0.000909649	0.000110476	chr7	121943705	121945445	chr7_121943705_121945445	1741	14	6.29965e-22	7.88112e-05	0.00605429	5.69515e-05	0.00235299	0.000729563
CRISPLD2	CRISPLD2	chr16	84918794	84918851	chr16_84918794_84918851	58	2	6.0825e-18	2.4721e-10	1.7147e-10	1.96979e-11	0.00249426	0.00176138	chr16	84853380	84853871	chr16_84853380_84853871	492	5	1.43918e-12	0.00132161	0.000310076	0.000121527	0.00136337	0.0006955
SNORD36, SNORD37	SNORD36	chr13	37495632	37495847	chr13_37495632_37495847	216	2	3.35878e-17	2.50486e-10	3.34533e-08	2.3585e-10	-0.00145062	-0.00126839	chr13	53424812	53425257	chr13_53424812_53425257	446	2	8.48653e-13	0.00135367	0.00579132	0.00193353	0.000819326	0.00074089
SNORA69	SNORA69	chr17	57406769	57407818	chr17_57406769_57407818	1050	3	1.34126e-36	3.03871e-10	1.32714e-14	3.04445e-15	0.00217022	0.000504255	chr17	35060451	35060679	chr17_35060451_35060679	229	3	8.90824e-13	1.33307e-05	1.28514e-05	4.089e-06	0.00216258	0.00141697
SNORA69	SNORA69	chr17	57406769	57407818	chr17_57406769_57407818	1050	3	1.34126e-36	3.03871e-10	1.32714e-14	3.04445e-15	0.00217022	0.000504255	chr17	72919704	72920187	chr17_72919704_72920187	484	3	3.75051e-12	0.000701176	0.000442484	0.000341723	0.0010281	0.000843379
SNORA69	SNORA69	chr17	57406769	57407818	chr17_57406769_57407818	1050	3	1.34126e-36	3.03871e-10	1.32714e-14	3.04445e-15	0.00217022	0.000504255	chr17	77783551	77784110	chr17_77783551_77784110	560	3	5.98571e-13	0.000300909	3.20555e-05	6.23801e-06	0.000667662	0.000328229
SNORA69	SNORA69	chr17	34079987	34079998	chr17_34079987_34079998	12	2	6.47333e-15	3.13985e-10	4.06863e-07	6.07307e-10	-0.00149071	-0.0011041	chr17	35060451	35060679	chr17_35060451_35060679	229	3	8.90824e-13	1.33307e-05	1.28514e-05	4.089e-06	0.00216258	0.00141697
SNORA69	SNORA69	chr17	34079987	34079998	chr17_34079987_34079998	12	2	6.47333e-15	3.13985e-10	4.06863e-07	6.07307e-10	-0.00149071	-0.0011041	chr17	72919704	72920187	chr17_72919704_72920187	484	3	3.75051e-12	0.000701176	0.000442484	0.000341723	0.0010281	0.000843379
SNORA69	SNORA69	chr17	34079987	34079998	chr17_34079987_34079998	12	2	6.47333e-15	3.13985e-10	4.06863e-07	6.07307e-10	-0.00149071	-0.0011041	chr17	77783551	77784110	chr17_77783551_77784110	560	3	5.98571e-13	0.000300909	3.20555e-05	6.23801e-06	0.000667662	0.000328229
SNORD65	SNORD65	chr4	140585523	140585744	chr4_140585523_140585744	222	2	9.04142e-54	3.31489e-10	2.56082e-20	4.18402e-19	0.0030792	0.00144783	chr4	147557774	147558544	chr4_147557774_147558544	771	5	7.67906e-30	3.06944e-07	3.8564e-08	1.42195e-12	0.00301389	0.00222257
SNORD65	SNORD65	chr4	140585523	140585744	chr4_140585523_140585744	222	2	9.04142e-54	3.31489e-10	2.56082e-20	4.18402e-19	0.0030792	0.00144783	chr4	174443366	174443865	chr4_174443366_174443865	500	4	2.23518e-12	0.000740629	0.030307	0.00204937	0.00148324	0.00120957
LSP1	LSP1	chr11	3190573	3190676	chr11_3190573_3190676	104	3	8.33332e-14	3.47009e-10	1.74289e-06	6.7424e-10	-0.00100454	-0.00062104	chr11	20184487	20184718	chr11_20184487_20184718	232	3	8.37117e-12	0.0104245	0.0318836	0.0116752	0.00147183	0.00102292
SNORD36	SNORD36	chr13	107354273	107354993	chr13_107354273_107354993	721	9	4.75042e-21	3.47929e-10	3.42954e-06	2.30299e-12	0.00286224	0.000645049	chr13	112720927	112721425	chr13_112720927_112721425	499	3	5.77784e-13	0.0251202	0.0449875	0.0329645	0.00142367	0.00101572
LSP1	LSP1	chr11	14402556	14403163	chr11_14402556_14403163	608	5	1.23141e-35	3.96227e-10	4.88036e-13	4.78856e-20	0.0022902	0.000176328	chr11	20184487	20184718	chr11_20184487_20184718	232	3	8.37117e-12	0.0104245	0.0318836	0.0116752	0.00147183	0.00102292
SNORD65	SNORD65	chr4	174427146	174428191	chr4_174427146_174428191	1046	9	1.1121e-19	4.10859e-10	6.03296e-05	1.68527e-11	0.00188366	0.00110157	chr4	147557774	147558544	chr4_147557774_147558544	771	5	7.67906e-30	3.06944e-07	3.8564e-08	1.42195e-12	0.00301389	0.00222257
SNORD65	SNORD65	chr4	174427146	174428191	chr4_174427146_174428191	1046	9	1.1121e-19	4.10859e-10	6.03296e-05	1.68527e-11	0.00188366	0.00110157	chr4	174443366	174443865	chr4_174443366_174443865	500	4	2.23518e-12	0.000740629	0.030307	0.00204937	0.00148324	0.00120957
SNORA69	SNORA69	chr17	46827113	46827626	chr17_46827113_46827626	514	4	6.1934e-29	4.48498e-10	1.1195e-11	2.11816e-14	0.000259357	0.00015779	chr17	35060451	35060679	chr17_35060451_35060679	229	3	8.90824e-13	1.33307e-05	1.28514e-05	4.089e-06	0.00216258	0.00141697
SNORA69	SNORA69	chr17	46827113	46827626	chr17_46827113_46827626	514	4	6.1934e-29	4.48498e-10	1.1195e-11	2.11816e-14	0.000259357	0.00015779	chr17	72919704	72920187	chr17_72919704_72920187	484	3	3.75051e-12	0.000701176	0.000442484	0.000341723	0.0010281	0.000843379
SNORA69	SNORA69	chr17	46827113	46827626	chr17_46827113_46827626	514	4	6.1934e-29	4.48498e-10	1.1195e-11	2.11816e-14	0.000259357	0.00015779	chr17	77783551	77784110	chr17_77783551_77784110	560	3	5.98571e-13	0.000300909	3.20555e-05	6.23801e-06	0.000667662	0.000328229
snoZ6, SNORA27, SNORA68, RPS23P5, SNORA57, 7SK, OTP, SNORD45	snoZ6	chr5	76923737	76926341	chr5_76923737_76926341	2605	11	7.65767e-54	5.45986e-10	5.08081e-15	1.22255e-24	0.00146786	0.000252833	chr5	76926079	76926752	chr5_76926079_76926752	674	4	4.79854e-21	3.00205e-07	1.61194e-06	5.35936e-08	0.00203406	0.000935838
SNORA38, SNORA8, SNORD28, SNORA20	SNORA38	chr6	117583181	117584815	chr6_117583181_117584815	1635	6	1.92201e-24	5.5647e-10	5.65479e-09	1.76129e-11	0.0022251	0.000689345	chr6	100050506	100051841	chr6_100050506_100051841	1336	11	1.76331e-19	0.00013563	0.0231118	4.12642e-05	0.00113676	0.000571765
SNORA38, SNORA8, SNORD28, SNORA20	SNORA38	chr6	117583181	117584815	chr6_117583181_117584815	1635	6	1.92201e-24	5.5647e-10	5.65479e-09	1.76129e-11	0.0022251	0.000689345	chr6	100912906	100913592	chr6_100912906_100913592	687	6	1.80809e-27	4.28586e-09	3.88355e-06	9.55214e-10	0.00153584	0.00100345
SNORA38, SNORA8, SNORD28, SNORA20	SNORA38	chr6	117583181	117584815	chr6_117583181_117584815	1635	6	1.92201e-24	5.5647e-10	5.65479e-09	1.76129e-11	0.0022251	0.000689345	chr6	105388668	105389599	chr6_105388668_105389599	932	6	5.95507e-16	1.21248e-07	0.000447273	1.48279e-07	0.00466408	0.00225804
SNORA69	SNORA69	chr17	40337590	40337892	chr17_40337590_40337892	303	4	7.15615e-17	6.05357e-10	1.30998e-06	3.97134e-11	0.00152696	0.000881281	chr17	35060451	35060679	chr17_35060451_35060679	229	3	8.90824e-13	1.33307e-05	1.28514e-05	4.089e-06	0.00216258	0.00141697
SNORA69	SNORA69	chr17	40337590	40337892	chr17_40337590_40337892	303	4	7.15615e-17	6.05357e-10	1.30998e-06	3.97134e-11	0.00152696	0.000881281	chr17	72919704	72920187	chr17_72919704_72920187	484	3	3.75051e-12	0.000701176	0.000442484	0.000341723	0.0010281	0.000843379
SNORA69	SNORA69	chr17	40337590	40337892	chr17_40337590_40337892	303	4	7.15615e-17	6.05357e-10	1.30998e-06	3.97134e-11	0.00152696	0.000881281	chr17	77783551	77784110	chr17_77783551_77784110	560	3	5.98571e-13	0.000300909	3.20555e-05	6.23801e-06	0.000667662	0.000328229
SNORD36	SNORD36	chr13	112628189	112628792	chr13_112628189_112628792	604	4	8.91099e-15	7.03515e-10	3.71713e-05	1.8484e-09	0.00122373	0.000475537	chr13	112720927	112721425	chr13_112720927_112721425	499	3	5.77784e-13	0.0251202	0.0449875	0.0329645	0.00142367	0.00101572
SNORA69	SNORA69	chr17	79315269	79316841	chr17_79315269_79316841	1573	6	1.81754e-44	9.16285e-10	9.0436e-13	8.151e-19	0.00213707	0.00060894	chr17	35060451	35060679	chr17_35060451_35060679	229	3	8.90824e-13	1.33307e-05	1.28514e-05	4.089e-06	0.00216258	0.00141697
SNORA69	SNORA69	chr17	79315269	79316841	chr17_79315269_79316841	1573	6	1.81754e-44	9.16285e-10	9.0436e-13	8.151e-19	0.00213707	0.00060894	chr17	72919704	72920187	chr17_72919704_72920187	484	3	3.75051e-12	0.000701176	0.000442484	0.000341723	0.0010281	0.000843379
SNORA69	SNORA69	chr17	79315269	79316841	chr17_79315269_79316841	1573	6	1.81754e-44	9.16285e-10	9.0436e-13	8.151e-19	0.00213707	0.00060894	chr17	77783551	77784110	chr17_77783551_77784110	560	3	5.98571e-13	0.000300909	3.20555e-05	6.23801e-06	0.000667662	0.000328229
SNORA73, SNORA64, SNORD75, SNORA74, snR65, 5S_rRNA, SCARNA6, SNORD39, SNORD18, SNORA36, SNORA75, SNORA48, SNORD56, SNORA43, SNORA1, Vault	SNORA73	chr2	45227645	45229649	chr2_45227645_45229649	2005	8	2.03637e-33	1.08144e-09	1.34181e-11	7.36237e-18	0.00234573	0.00100282	chr2	43020129	43020264	chr2_43020129_43020264	136	3	1.49848e-11	0.00652806	0.0156706	0.00886975	0.00177091	0.000805603
VAX1	VAX1	chr10	118890977	118894180	chr10_118890977_118894180	3204	19	1.27588e-25	1.08465e-09	4.28736e-10	1.72312e-20	0.00101866	0.000167036	chr10	118896363	118897280	chr10_118896363_118897280	918	6	6.76839e-15	0.000127202	0.039077	0.000730411	0.00160715	0.00135487
SNORA38, SNORA8, SNORD28, SNORA20	SNORA38	chr6	91321150	91322313	chr6_91321150_91322313	1164	6	3.8233e-28	1.23703e-09	1.81138e-08	7.03166e-15	0.00201699	0.00117176	chr6	100050506	100051841	chr6_100050506_100051841	1336	11	1.76331e-19	0.00013563	0.0231118	4.12642e-05	0.00113676	0.000571765
SNORA38, SNORA8, SNORD28, SNORA20	SNORA38	chr6	91321150	91322313	chr6_91321150_91322313	1164	6	3.8233e-28	1.23703e-09	1.81138e-08	7.03166e-15	0.00201699	0.00117176	chr6	100912906	100913592	chr6_100912906_100913592	687	6	1.80809e-27	4.28586e-09	3.88355e-06	9.55214e-10	0.00153584	0.00100345
SNORA38, SNORA8, SNORD28, SNORA20	SNORA38	chr6	91321150	91322313	chr6_91321150_91322313	1164	6	3.8233e-28	1.23703e-09	1.81138e-08	7.03166e-15	0.00201699	0.00117176	chr6	105388668	105389599	chr6_105388668_105389599	932	6	5.95507e-16	1.21248e-07	0.000447273	1.48279e-07	0.00466408	0.00225804
snoU13, Y_RNA, SCARNA16, SCARNA21, U1, SCARNA17, SCARNA18, SNORD112, SNORA62, SNORA63, SNORD46, SNORA2, SNORD81, U3, SNORA51, SCARNA20, SNORA67, U6, SNORA70, SNORA77, SNORA26, U8, SCARNA11, SNORA31, SNORA42, SNORA40, SNORD64, ACA64, snoU109, SNORD60	snoU13	chr1	26484249	26485402	chr1_26484249_26485402	1154	5	3.02326e-54	1.24306e-09	3.65502e-15	5.23178e-22	0.00236579	0.00104551	chr1	26735245	26736154	chr1_26735245_26736154	910	10	1.46723e-20	3.52016e-05	0.0165931	1.96531e-05	0.00195578	0.000790606
snoU13, Y_RNA, SCARNA16, SCARNA21, SNORD112, SNORA62, SNORA2, U3, SNORA51, SCARNA20, SNORA67, SNORA70, SNORA77, SNORA26, U8, SCARNA11, SNORA31, SNORA42, SNORA40, snoU109, SNORD60	snoU13	chr1	10692435	10692799	chr1_10692435_10692799	365	2	1.77352e-25	1.33241e-09	4.10042e-13	8.10008e-13	0.00151348	0.000992067	chr1	11919095	11919699	chr1_11919095_11919699	605	7	3.54165e-14	0.000970239	0.00258365	0.000422394	0.00139384	0.000625622
SNORD36	SNORD36	chr13	103719706	103720052	chr13_103719706_103720052	347	2	1.58968e-12	1.4393e-09	2.92259e-06	3.42651e-09	-0.00139757	-1.74709e-05	chr13	112720927	112721425	chr13_112720927_112721425	499	3	5.77784e-13	0.0251202	0.0449875	0.0329645	0.00142367	0.00101572
SNORD36, IRS2	SNORD36	chr13	110436111	110438288	chr13_110436111_110438288	2178	7	1.02698e-50	1.81461e-09	2.71791e-15	4.15417e-21	0.00205014	0.000680941	chr13	110438256	110439234	chr13_110438256_110439234	979	10	3.1314e-16	0.00027152	0.0333572	0.000967487	0.00244189	0.000825794
LSP1	LSP1	chr11	3246091	3246380	chr11_3246091_3246380	290	4	1.08905e-13	1.89808e-09	4.46479e-06	1.37099e-09	-0.000973456	0.000217587	chr11	20184487	20184718	chr11_20184487_20184718	232	3	8.37117e-12	0.0104245	0.0318836	0.0116752	0.00147183	0.00102292
SNORA69	SNORA69	chr17	32645748	32645806	chr17_32645748_32645806	59	2	6.97632e-27	2.19104e-09	1.62018e-14	7.5149e-14	0.00290061	0.00165104	chr17	35060451	35060679	chr17_35060451_35060679	229	3	8.90824e-13	1.33307e-05	1.28514e-05	4.089e-06	0.00216258	0.00141697
SNORA69	SNORA69	chr17	32645748	32645806	chr17_32645748_32645806	59	2	6.97632e-27	2.19104e-09	1.62018e-14	7.5149e-14	0.00290061	0.00165104	chr17	72919704	72920187	chr17_72919704_72920187	484	3	3.75051e-12	0.000701176	0.000442484	0.000341723	0.0010281	0.000843379
SNORA69	SNORA69	chr17	32645748	32645806	chr17_32645748_32645806	59	2	6.97632e-27	2.19104e-09	1.62018e-14	7.5149e-14	0.00290061	0.00165104	chr17	77783551	77784110	chr17_77783551_77784110	560	3	5.98571e-13	0.000300909	3.20555e-05	6.23801e-06	0.000667662	0.000328229
SNORA69	SNORA69	chr17	77818356	77819279	chr17_77818356_77819279	924	3	1.75704e-28	3.00069e-09	1.73018e-12	1.49987e-12	0.00247785	0.000972734	chr17	35060451	35060679	chr17_35060451_35060679	229	3	8.90824e-13	1.33307e-05	1.28514e-05	4.089e-06	0.00216258	0.00141697
SNORA69	SNORA69	chr17	77818356	77819279	chr17_77818356_77819279	924	3	1.75704e-28	3.00069e-09	1.73018e-12	1.49987e-12	0.00247785	0.000972734	chr17	72919704	72920187	chr17_72919704_72920187	484	3	3.75051e-12	0.000701176	0.000442484	0.000341723	0.0010281	0.000843379
SNORA69	SNORA69	chr17	77818356	77819279	chr17_77818356_77819279	924	3	1.75704e-28	3.00069e-09	1.73018e-12	1.49987e-12	0.00247785	0.000972734	chr17	77783551	77784110	chr17_77783551_77784110	560	3	5.98571e-13	0.000300909	3.20555e-05	6.23801e-06	0.000667662	0.000328229
SNORD36	SNORD36	chr13	112061955	112062791	chr13_112061955_112062791	837	2	1.02828e-11	3.14002e-09	6.87548e-07	4.62318e-09	-0.0017857	-0.00161645	chr13	112720927	112721425	chr13_112720927_112721425	499	3	5.77784e-13	0.0251202	0.0449875	0.0329645	0.00142367	0.00101572
PCBP3	PCBP3	chr21	47333731	47334448	chr21_47333731_47334448	718	3	2.7387e-15	3.20348e-09	6.7928e-08	6.47171e-11	0.00118595	0.000665011	chr21	47063285	47064307	chr21_47063285_47064307	1023	6	4.50289e-17	0.000940579	0.000471949	1.10598e-05	0.00149487	0.000551873
SNORD65	SNORD65	chr4	178363707	178364890	chr4_178363707_178364890	1184	5	6.49512e-26	3.23332e-09	2.5039e-08	7.77926e-14	-0.00301607	-0.00117133	chr4	147557774	147558544	chr4_147557774_147558544	771	5	7.67906e-30	3.06944e-07	3.8564e-08	1.42195e-12	0.00301389	0.00222257
SNORD65	SNORD65	chr4	178363707	178364890	chr4_178363707_178364890	1184	5	6.49512e-26	3.23332e-09	2.5039e-08	7.77926e-14	-0.00301607	-0.00117133	chr4	174443366	174443865	chr4_174443366_174443865	500	4	2.23518e-12	0.000740629	0.030307	0.00204937	0.00148324	0.00120957
SNORD65	SNORD65	chr4	147043613	147043810	chr4_147043613_147043810	198	2	8.37898e-12	3.27453e-09	7.09982e-06	8.25638e-09	-0.00127404	-0.00117387	chr4	147557774	147558544	chr4_147557774_147558544	771	5	7.67906e-30	3.06944e-07	3.8564e-08	1.42195e-12	0.00301389	0.00222257
SNORD65	SNORD65	chr4	147043613	147043810	chr4_147043613_147043810	198	2	8.37898e-12	3.27453e-09	7.09982e-06	8.25638e-09	-0.00127404	-0.00117387	chr4	174443366	174443865	chr4_174443366_174443865	500	4	2.23518e-12	0.000740629	0.030307	0.00204937	0.00148324	0.00120957
SNORA7, NKAIN3, SNORA32	SNORA7	chr8	63161676	63162277	chr8_63161676_63162277	602	2	4.60597e-20	3.90633e-09	6.46851e-09	7.47398e-10	0.000409757	4.7264e-05	chr8	63160853	63161676	chr8_63160853_63161676	824	7	3.87996e-15	0.000229958	0.0682819	0.00184886	0.00222788	0.00134469
SNORA69	SNORA69	chr17	29152934	29152968	chr17_29152934_29152968	35	2	4.88714e-13	4.75782e-09	1.00964e-06	7.234e-09	-0.00127167	-0.00112253	chr17	35060451	35060679	chr17_35060451_35060679	229	3	8.90824e-13	1.33307e-05	1.28514e-05	4.089e-06	0.00216258	0.00141697
SNORA69	SNORA69	chr17	29152934	29152968	chr17_29152934_29152968	35	2	4.88714e-13	4.75782e-09	1.00964e-06	7.234e-09	-0.00127167	-0.00112253	chr17	72919704	72920187	chr17_72919704_72920187	484	3	3.75051e-12	0.000701176	0.000442484	0.000341723	0.0010281	0.000843379
SNORA69	SNORA69	chr17	29152934	29152968	chr17_29152934_29152968	35	2	4.88714e-13	4.75782e-09	1.00964e-06	7.234e-09	-0.00127167	-0.00112253	chr17	77783551	77784110	chr17_77783551_77784110	560	3	5.98571e-13	0.000300909	3.20555e-05	6.23801e-06	0.000667662	0.000328229
SNORA69	SNORA69	chr17	48258561	48259448	chr17_48258561_48259448	888	5	3.93782e-19	5.72148e-09	1.09807e-09	7.40953e-13	0.00151549	-2.32547e-05	chr17	35060451	35060679	chr17_35060451_35060679	229	3	8.90824e-13	1.33307e-05	1.28514e-05	4.089e-06	0.00216258	0.00141697
SNORA69	SNORA69	chr17	48258561	48259448	chr17_48258561_48259448	888	5	3.93782e-19	5.72148e-09	1.09807e-09	7.40953e-13	0.00151549	-2.32547e-05	chr17	72919704	72920187	chr17_72919704_72920187	484	3	3.75051e-12	0.000701176	0.000442484	0.000341723	0.0010281	0.000843379
SNORA69	SNORA69	chr17	48258561	48259448	chr17_48258561_48259448	888	5	3.93782e-19	5.72148e-09	1.09807e-09	7.40953e-13	0.00151549	-2.32547e-05	chr17	77783551	77784110	chr17_77783551_77784110	560	3	5.98571e-13	0.000300909	3.20555e-05	6.23801e-06	0.000667662	0.000328229
SNORA38, SNORA8, SNORD28, SNORA20	SNORA38	chr6	85824168	85824216	chr6_85824168_85824216	49	3	6.98384e-11	5.73676e-09	0.000367866	3.1923e-08	0.00162304	0.00129517	chr6	100050506	100051841	chr6_100050506_100051841	1336	11	1.76331e-19	0.00013563	0.0231118	4.12642e-05	0.00113676	0.000571765
SNORA38, SNORA8, SNORD28, SNORA20	SNORA38	chr6	85824168	85824216	chr6_85824168_85824216	49	3	6.98384e-11	5.73676e-09	0.000367866	3.1923e-08	0.00162304	0.00129517	chr6	100912906	100913592	chr6_100912906_100913592	687	6	1.80809e-27	4.28586e-09	3.88355e-06	9.55214e-10	0.00153584	0.00100345
SNORA38, SNORA8, SNORD28, SNORA20	SNORA38	chr6	85824168	85824216	chr6_85824168_85824216	49	3	6.98384e-11	5.73676e-09	0.000367866	3.1923e-08	0.00162304	0.00129517	chr6	105388668	105389599	chr6_105388668_105389599	932	6	5.95507e-16	1.21248e-07	0.000447273	1.48279e-07	0.00466408	0.00225804
snoU13, Y_RNA, SCARNA16, SCARNA21, SNORD112, SNORA62, SNORA2, U3, SNORA51, SCARNA20, SNORA67, SNORA70, SNORA77, SNORA26, U8, SCARNA11, SNORA31, SNORA42, SNORA40, snoU109, SNORD60	snoU13	chr1	11000722	11001038	chr1_11000722_11001038	317	2	8.44387e-12	6.07629e-09	3.44075e-06	1.22632e-08	0.00156902	0.000920525	chr1	11919095	11919699	chr1_11919095_11919699	605	7	3.54165e-14	0.000970239	0.00258365	0.000422394	0.00139384	0.000625622
SNORD36	SNORD36	chr13	112630296	112631672	chr13_112630296_112631672	1377	12	8.95594e-19	6.20391e-09	6.1844e-06	1.53851e-10	-0.00191782	3.5666e-05	chr13	112720927	112721425	chr13_112720927_112721425	499	3	5.77784e-13	0.0251202	0.0449875	0.0329645	0.00142367	0.00101572
SNORA11, PITX2, SNORD65	SNORA11	chr4	111558157	111559355	chr4_111558157_111559355	1199	10	1.64802e-30	7.40624e-09	2.43146e-08	1.9789e-17	0.00131398	0.00038218	chr4	111543401	111544463	chr4_111543401_111544463	1063	9	7.52494e-14	0.000648606	0.050717	0.00187374	0.00209458	0.000813929
SNORD36, CCNA1, SNORD37	SNORD36	chr13	37016859	37016876	chr13_37016859_37016876	18	2	8.59744e-13	7.50593e-09	1.01228e-07	4.33607e-09	-0.00162636	-0.00110239	chr13	37006063	37006611	chr13_37006063_37006611	549	8	4.98621e-20	0.0375211	0.00182288	9.93124e-06	0.00110299	0.000412995
SNORA69	SNORA69	chr17	56042910	56043017	chr17_56042910_56043017	108	3	1.07882e-12	8.13797e-09	1.43217e-06	5.06268e-09	0.00251099	0.00163001	chr17	35060451	35060679	chr17_35060451_35060679	229	3	8.90824e-13	1.33307e-05	1.28514e-05	4.089e-06	0.00216258	0.00141697
SNORA69	SNORA69	chr17	56042910	56043017	chr17_56042910_56043017	108	3	1.07882e-12	8.13797e-09	1.43217e-06	5.06268e-09	0.00251099	0.00163001	chr17	72919704	72920187	chr17_72919704_72920187	484	3	3.75051e-12	0.000701176	0.000442484	0.000341723	0.0010281	0.000843379
SNORA69	SNORA69	chr17	56042910	56043017	chr17_56042910_56043017	108	3	1.07882e-12	8.13797e-09	1.43217e-06	5.06268e-09	0.00251099	0.00163001	chr17	77783551	77784110	chr17_77783551_77784110	560	3	5.98571e-13	0.000300909	3.20555e-05	6.23801e-06	0.000667662	0.000328229
SNORD36	SNORD36	chr13	114916698	114918509	chr13_114916698_114918509	1812	7	5.33057e-10	8.43426e-09	0.000353642	2.11424e-09	-0.00117682	-0.000768093	chr13	112720927	112721425	chr13_112720927_112721425	499	3	5.77784e-13	0.0251202	0.0449875	0.0329645	0.00142367	0.00101572
SNORA38, SNORA8, SNORD28, SNORA20	SNORA38	chr6	109038135	109038650	chr6_109038135_109038650	516	3	1.5665e-12	8.83335e-09	6.77047e-06	8.2402e-09	0.00155368	0.000991958	chr6	100050506	100051841	chr6_100050506_100051841	1336	11	1.76331e-19	0.00013563	0.0231118	4.12642e-05	0.00113676	0.000571765
SNORA38, SNORA8, SNORD28, SNORA20	SNORA38	chr6	109038135	109038650	chr6_109038135_109038650	516	3	1.5665e-12	8.83335e-09	6.77047e-06	8.2402e-09	0.00155368	0.000991958	chr6	100912906	100913592	chr6_100912906_100913592	687	6	1.80809e-27	4.28586e-09	3.88355e-06	9.55214e-10	0.00153584	0.00100345
SNORA38, SNORA8, SNORD28, SNORA20	SNORA38	chr6	109038135	109038650	chr6_109038135_109038650	516	3	1.5665e-12	8.83335e-09	6.77047e-06	8.2402e-09	0.00155368	0.000991958	chr6	105388668	105389599	chr6_105388668_105389599	932	6	5.95507e-16	1.21248e-07	0.000447273	1.48279e-07	0.00466408	0.00225804
SNORA22, SNORA15, COBL	SNORA22	chr7	51383119	51385729	chr7_51383119_51385729	2611	14	3.03206e-31	9.21112e-09	9.2137e-10	1.12652e-16	0.00123373	0.00024286	chr7	51384371	51384676	chr7_51384371_51384676	306	7	1.51847e-11	0.0152101	0.0291131	0.0219164	0.000649645	0.000429428
SATB2-AS1, SNORD11, SNORD51, SNORA41, SCARNA6, SNORD39, SNORA75, SNORA48, SATB2, SNORA1, Vault	SATB2	chr2	200326591	200327336	chr2_200326591_200327336	746	5	1.50585e-29	1.02527e-08	6.51153e-12	4.24476e-13	0.00164217	0.00046945	chr2	200334402	200335148	chr2_200334402_200335148	747	9	4.34833e-13	0.017257	0.0255958	0.0100663	0.00107662	0.000553835
SNORA69	SNORA69	chr17	48348059	48348565	chr17_48348059_48348565	507	2	3.47319e-19	1.119e-08	8.37256e-10	4.14089e-10	0.00193415	0.00121008	chr17	35060451	35060679	chr17_35060451_35060679	229	3	8.90824e-13	1.33307e-05	1.28514e-05	4.089e-06	0.00216258	0.00141697
SNORA69	SNORA69	chr17	48348059	48348565	chr17_48348059_48348565	507	2	3.47319e-19	1.119e-08	8.37256e-10	4.14089e-10	0.00193415	0.00121008	chr17	72919704	72920187	chr17_72919704_72920187	484	3	3.75051e-12	0.000701176	0.000442484	0.000341723	0.0010281	0.000843379
SNORA69	SNORA69	chr17	48348059	48348565	chr17_48348059_48348565	507	2	3.47319e-19	1.119e-08	8.37256e-10	4.14089e-10	0.00193415	0.00121008	chr17	77783551	77784110	chr17_77783551_77784110	560	3	5.98571e-13	0.000300909	3.20555e-05	6.23801e-06	0.000667662	0.000328229
snoU13, Y_RNA, SCARNA16, U1, SNORD112, SNORA63, SNORD46, SNORA2, SNORD81, U3, SNORA51, SNORA25, SNORA58, CKS1B, SCARNA20, SNORA67, U6, SNORA70, SNORA77, SNORA26, U8, SCARNA11, SNORA31, SNORA42, SNORA40, SNORD64, ACA64, SNORD78, snoU109, SNORD60, SNORD116	snoU13	chr1	92011732	92012736	chr1_92011732_92012736	1005	9	8.22893e-12	1.42479e-08	0.00154612	9.94698e-08	0.00240805	0.00132037	chr1	91172288	91172337	chr1_91172288_91172337	50	2	1.87497e-12	0.0188194	0.00699173	0.0107396	0.00161514	0.000882884
snoU13, Y_RNA, SCARNA16, U1, SNORD112, SNORA63, SNORD46, SNORA2, SNORD81, U3, SNORA51, SNORA25, SNORA58, CKS1B, SCARNA20, SNORA67, U6, SNORA70, SNORA77, SNORA26, U8, SCARNA11, SNORA31, SNORA42, SNORA40, SNORD64, ACA64, SNORD78, snoU109, SNORD60, SNORD116	snoU13	chr1	92011732	92012736	chr1_92011732_92012736	1005	9	8.22893e-12	1.42479e-08	0.00154612	9.94698e-08	0.00240805	0.00132037	chr1	91190366	91190891	chr1_91190366_91190891	526	5	1.48921e-12	0.00879172	0.0648127	0.0203167	0.002145	0.00146291
FOXG1, SNORA79	FOXG1	chr14	29234671	29236535	chr14_29234671_29236535	1865	25	4.58737e-47	1.5153e-08	1.77204e-08	5.77283e-22	0.000548468	0.000103465	chr14	29234671	29237202	chr14_29234671_29237202	2532	27	3.97164e-51	7.43406e-19	0.00403238	6.48604e-17	0.00311789	0.00136023
SNORA81, SNORD66, SNORD2, SNORA18, U4	SNORA81	chr3	170072769	170074131	chr3_170072769_170074131	1363	4	1.46727e-26	2.02363e-08	2.3035e-09	4.30072e-13	0.00160444	0.000621785	chr3	157812226	157812763	chr3_157812226_157812763	538	3	4.13276e-17	2.23573e-05	0.00040082	3.12761e-05	0.00209096	0.00163643
VAX1	VAX1	chr10	118896012	118896776	chr10_118896012_118896776	765	5	3.67834e-43	2.05553e-08	9.21342e-13	3.78842e-17	0.00331344	0.000886519	chr10	118896363	118897280	chr10_118896363_118897280	918	6	6.76839e-15	0.000127202	0.039077	0.000730411	0.00160715	0.00135487
LSP1	LSP1	chr11	2286788	2288051	chr11_2286788_2288051	1264	5	4.9678e-32	2.24393e-08	8.48516e-13	1.01255e-13	-0.00186073	-0.000356569	chr11	20184487	20184718	chr11_20184487_20184718	232	3	8.37117e-12	0.0104245	0.0318836	0.0116752	0.00147183	0.00102292
SNORA73, SNORA64, snR65, NTSR2, SNORA75, SNORA48, SNORD56, SNORA43	SNORA73	chr2	11809858	11810683	chr2_11809858_11810683	826	11	2.80857e-41	2.47557e-08	5.39687e-10	1.02834e-19	-0.00193181	-0.000620297	chr2	11809858	11810534	chr2_11809858_11810534	677	8	3.26746e-17	0.00498633	0.000663959	7.5266e-05	0.00206815	0.00104249
SYT7, SNORD43	SYT7	chr11	61322107	61323667	chr11_61322107_61323667	1561	9	1.33012e-29	2.54087e-08	3.59755e-09	4.32278e-17	0.00146885	0.000554222	chr11	61334859	61335600	chr11_61334859_61335600	742	6	3.89592e-14	0.000433297	0.00294757	5.56565e-05	0.00222118	0.00118648
SNORD36	SNORD36	chr13	77461056	77461919	chr13_77461056_77461919	864	8	3.32884e-120	2.8457e-08	6.52441e-22	2.58347e-23	0.00446849	0.000650544	chr13	112720927	112721425	chr13_112720927_112721425	499	3	5.77784e-13	0.0251202	0.0449875	0.0329645	0.00142367	0.00101572
SNORD36	SNORD36	chr13	112785388	112786727	chr13_112785388_112786727	1340	4	2.21908e-13	2.90638e-08	7.85609e-06	1.65276e-08	-0.00107677	-0.000639173	chr13	112720927	112721425	chr13_112720927_112721425	499	3	5.77784e-13	0.0251202	0.0449875	0.0329645	0.00142367	0.00101572
DIXDC1	DIXDC1	chr11	111809582	111810533	chr11_111809582_111810533	952	3	1.84321e-09	2.98388e-08	9.01453e-05	7.48511e-08	-0.00134725	-0.000278965	chr11	111848326	111848400	chr11_111848326_111848400	75	2	1.17426e-11	0.00523944	0.0209885	0.00815728	0.00259726	0.00202361
snoU13, Y_RNA, SCARNA16, SCARNA21, U1, SCARNA17, SCARNA18, SNORD112, SNORA62, SNORA63, SNORD46, SNORA2, SNORD81, U3, SNORA51, SCARNA20, SNORA67, U6, SNORA70, SNORA77, SNORA26, U8, SCARNA11, SNORA31, SNORA42, SNORA40, SNORD64, ACA64, snoU109, SNORD60	snoU13	chr1	25349006	25349681	chr1_25349006_25349681	676	2	1.36823e-10	3.0812e-08	2.04073e-05	7.17602e-08	0.00145633	0.00114983	chr1	26735245	26736154	chr1_26735245_26736154	910	10	1.46723e-20	3.52016e-05	0.0165931	1.96531e-05	0.00195578	0.000790606
SYT7, SNORD43	SYT7	chr11	61302112	61302466	chr11_61302112_61302466	355	3	7.46213e-15	3.13922e-08	7.39396e-08	2.4863e-09	0.00188324	0.000452156	chr11	61334859	61335600	chr11_61334859_61335600	742	6	3.89592e-14	0.000433297	0.00294757	5.56565e-05	0.00222118	0.00118648
HOTTIP, SNORA15, HOXA13	HOTTIP	chr7	27237893	27238279	chr7_27237893_27238279	387	2	3.06112e-14	3.22069e-08	7.42115e-07	2.79919e-08	0.00134403	0.000752994	chr7	27238910	27239556	chr7_27238910_27239556	647	3	1.10371e-13	3.17244e-05	0.00194603	7.59996e-05	0.0018725	0.00105203
snoU13, Y_RNA, SCARNA16, U1, SCARNA18, SCARNA24, SNORD112, SNORA62, SNORA63, SNORD46, SNORA2, SNORD81, U3, SNORA51, SNORA25, SCARNA20, SNORA67, U6, SNORA70, SNORA77, SNORA26, U8, SCARNA11, SNORA31, SNORA42, SNORA40, SNORD64, ACA64, snoU109, SNORD60, SNORD116	snoU13	chr1	47914869	47915951	chr1_47914869_47915951	1083	6	5.39458e-16	3.63706e-08	3.74072e-05	3.67955e-10	-0.0014878	-0.000366092	chr1	47910239	47910456	chr1_47910239_47910456	218	2	8.11997e-12	0.00471268	0.0303093	0.0083994	0.00128211	0.00109306
SNORD36	SNORD36	chr13	112212075	112212266	chr13_112212075_112212266	192	4	1.0476e-13	4.83314e-08	3.32681e-05	2.70494e-09	-0.000778898	-0.000498777	chr13	112720927	112721425	chr13_112720927_112721425	499	3	5.77784e-13	0.0251202	0.0449875	0.0329645	0.00142367	0.00101572
GNAI1	GNAI1	chr7	79762956	79764387	chr7_79762956_79764387	1432	7	1.63509e-17	5.40673e-08	1.78876e-07	1.27335e-10	0.00118725	0.000179759	chr7	79764176	79764387	chr7_79764176_79764387	212	4	1.94787e-12	0.000376489	0.0193748	0.000785325	0.00268362	0.00139987
SNORD36	SNORD36	chr13	107568171	107569395	chr13_107568171_107569395	1225	5	2.15517e-16	5.41e-08	7.27634e-08	1.19753e-09	0.00286856	0.0019469	chr13	112720927	112721425	chr13_112720927_112721425	499	3	5.77784e-13	0.0251202	0.0449875	0.0329645	0.00142367	0.00101572
snoU13, Y_RNA, SCARNA16, U1, SCARNA18, SCARNA24, SNORD112, SNORA62, SNORA63, SNORD46, SNORA2, SNORD81, U3, SNORA51, SNORA25, SCARNA20, SNORA67, U6, SNORA70, SNORA77, SNORA26, U8, SCARNA11, SNORA31, SNORA42, SNORA40, SNORD64, ACA64, snoU109, SNORD60, SNORD116	snoU13	chr1	47909234	47911019	chr1_47909234_47911019	1786	10	3.1832e-51	5.59545e-08	6.55561e-12	2.62092e-22	0.0027601	0.000426381	chr1	47910239	47910456	chr1_47910239_47910456	218	2	8.11997e-12	0.00471268	0.0303093	0.0083994	0.00128211	0.00109306
SNORA81, SNORD66, SNORD2, SNORA18, U4	SNORA81	chr3	177077202	177077684	chr3_177077202_177077684	483	3	1.3622e-59	5.66178e-08	6.78867e-20	7.84348e-19	0.00306659	0.00100136	chr3	157812226	157812763	chr3_157812226_157812763	538	3	4.13276e-17	2.23573e-05	0.00040082	3.12761e-05	0.00209096	0.00163643
TWIST1	TWIST1	chr7	19145530	19147487	chr7_19145530_19147487	1958	11	2.83463e-28	5.90263e-08	4.90431e-08	1.7768e-15	-0.000887709	-4.21218e-05	chr7	19156902	19158378	chr7_19156902_19158378	1477	21	2.96666e-28	0.0177355	8.37261e-05	2.79743e-05	0.00140373	0.000428777
SNORA69	SNORA69	chr17	81023217	81024123	chr17_81023217_81024123	907	4	9.26991e-24	7.55492e-08	1.22985e-10	5.48083e-11	0.00120918	0.00071286	chr17	35060451	35060679	chr17_35060451_35060679	229	3	8.90824e-13	1.33307e-05	1.28514e-05	4.089e-06	0.00216258	0.00141697
SNORA69	SNORA69	chr17	81023217	81024123	chr17_81023217_81024123	907	4	9.26991e-24	7.55492e-08	1.22985e-10	5.48083e-11	0.00120918	0.00071286	chr17	72919704	72920187	chr17_72919704_72920187	484	3	3.75051e-12	0.000701176	0.000442484	0.000341723	0.0010281	0.000843379
SNORA69	SNORA69	chr17	81023217	81024123	chr17_81023217_81024123	907	4	9.26991e-24	7.55492e-08	1.22985e-10	5.48083e-11	0.00120918	0.00071286	chr17	77783551	77784110	chr17_77783551_77784110	560	3	5.98571e-13	0.000300909	3.20555e-05	6.23801e-06	0.000667662	0.000328229
SNORA69	SNORA69	chr17	77901129	77901224	chr17_77901129_77901224	96	2	1.49111e-09	1.1094e-07	0.00011224	2.91719e-07	0.00112746	0.000945655	chr17	35060451	35060679	chr17_35060451_35060679	229	3	8.90824e-13	1.33307e-05	1.28514e-05	4.089e-06	0.00216258	0.00141697
SNORA69	SNORA69	chr17	77901129	77901224	chr17_77901129_77901224	96	2	1.49111e-09	1.1094e-07	0.00011224	2.91719e-07	0.00112746	0.000945655	chr17	72919704	72920187	chr17_72919704_72920187	484	3	3.75051e-12	0.000701176	0.000442484	0.000341723	0.0010281	0.000843379
SNORA69	SNORA69	chr17	77901129	77901224	chr17_77901129_77901224	96	2	1.49111e-09	1.1094e-07	0.00011224	2.91719e-07	0.00112746	0.000945655	chr17	77783551	77784110	chr17_77783551_77784110	560	3	5.98571e-13	0.000300909	3.20555e-05	6.23801e-06	0.000667662	0.000328229
snoZ6, SNORA27, SNORA68, SNORA57, 7SK, LINC00461, SNORD45, SNORD95	snoZ6	chr5	87955366	87955859	chr5_87955366_87955859	494	4	3.80739e-14	1.13962e-07	1.01568e-06	2.99427e-08	0.00177532	0.000554222	chr5	87956389	87957260	chr5_87956389_87957260	872	7	9.82399e-21	2.85985e-06	8.38394e-05	4.21112e-07	0.00089718	0.000556894
SNORD74, SNORD50, SNORA11, snoU2_19, SNORD65	SNORD74	chr4	94753295	94753431	chr4_94753295_94753431	137	3	9.10445e-11	1.27151e-07	2.19662e-05	8.77845e-08	0.000559466	0.000349913	chr4	94749496	94749609	chr4_94749496_94749609	114	3	8.01431e-12	0.035886	0.0646947	0.0447508	0.000860844	0.000806866
SNORA69	SNORA69	chr17	73007747	73008509	chr17_73007747_73008509	763	2	2.02565e-45	1.43973e-07	8.29926e-14	7.82353e-13	-0.00348884	-0.00172612	chr17	35060451	35060679	chr17_35060451_35060679	229	3	8.90824e-13	1.33307e-05	1.28514e-05	4.089e-06	0.00216258	0.00141697
SNORA69	SNORA69	chr17	73007747	73008509	chr17_73007747_73008509	763	2	2.02565e-45	1.43973e-07	8.29926e-14	7.82353e-13	-0.00348884	-0.00172612	chr17	72919704	72920187	chr17_72919704_72920187	484	3	3.75051e-12	0.000701176	0.000442484	0.000341723	0.0010281	0.000843379
SNORA69	SNORA69	chr17	73007747	73008509	chr17_73007747_73008509	763	2	2.02565e-45	1.43973e-07	8.29926e-14	7.82353e-13	-0.00348884	-0.00172612	chr17	77783551	77784110	chr17_77783551_77784110	560	3	5.98571e-13	0.000300909	3.20555e-05	6.23801e-06	0.000667662	0.000328229
U7, SNORD77, C3orf14, SNORA33, SNORA81, SNORD66, SNORD2, SNORD5, SNORD38, SNORD63, PTPRG-AS1, Metazoa_SRP, SNORA18	U7	chr3	62304554	62305519	chr3_62304554_62305519	966	9	1.31648e-52	1.74492e-07	1.11923e-12	7.59341e-19	-0.00214026	-0.000370304	chr3	62304470	62305003	chr3_62304470_62305003	534	6	4.7457e-13	0.000287524	0.0646825	0.00210945	0.00120593	0.000947353
SNORD36	SNORD36	chr13	113094247	113094693	chr13_113094247_113094693	447	2	7.61742e-11	1.74544e-07	9.20172e-06	2.47271e-07	-0.00127468	-0.000793185	chr13	112720927	112721425	chr13_112720927_112721425	499	3	5.77784e-13	0.0251202	0.0449875	0.0329645	0.00142367	0.00101572
LSP1	LSP1	chr11	8038043	8038083	chr11_8038043_8038083	41	2	2.27602e-09	1.8364e-07	5.96603e-05	4.15901e-07	0.000925307	0.000558337	chr11	20184487	20184718	chr11_20184487_20184718	232	3	8.37117e-12	0.0104245	0.0318836	0.0116752	0.00147183	0.00102292
SNORA38, SNORA8, SNORD28, SNORA20	SNORA38	chr6	105403577	105403899	chr6_105403577_105403899	323	2	4.19773e-11	1.93043e-07	5.88166e-05	4.332e-07	0.000433923	0.00042698	chr6	100050506	100051841	chr6_100050506_100051841	1336	11	1.76331e-19	0.00013563	0.0231118	4.12642e-05	0.00113676	0.000571765
SNORA38, SNORA8, SNORD28, SNORA20	SNORA38	chr6	105403577	105403899	chr6_105403577_105403899	323	2	4.19773e-11	1.93043e-07	5.88166e-05	4.332e-07	0.000433923	0.00042698	chr6	100912906	100913592	chr6_100912906_100913592	687	6	1.80809e-27	4.28586e-09	3.88355e-06	9.55214e-10	0.00153584	0.00100345
SNORA38, SNORA8, SNORD28, SNORA20	SNORA38	chr6	105403577	105403899	chr6_105403577_105403899	323	2	4.19773e-11	1.93043e-07	5.88166e-05	4.332e-07	0.000433923	0.00042698	chr6	105388668	105389599	chr6_105388668_105389599	932	6	5.95507e-16	1.21248e-07	0.000447273	1.48279e-07	0.00466408	0.00225804
SNORD65	SNORD65	chr4	146117505	146118165	chr4_146117505_146118165	661	2	8.12364e-31	1.93847e-07	3.43478e-14	3.73548e-13	-0.00263488	-0.00129344	chr4	147557774	147558544	chr4_147557774_147558544	771	5	7.67906e-30	3.06944e-07	3.8564e-08	1.42195e-12	0.00301389	0.00222257
SNORD65	SNORD65	chr4	146117505	146118165	chr4_146117505_146118165	661	2	8.12364e-31	1.93847e-07	3.43478e-14	3.73548e-13	-0.00263488	-0.00129344	chr4	174443366	174443865	chr4_174443366_174443865	500	4	2.23518e-12	0.000740629	0.030307	0.00204937	0.00148324	0.00120957
snoU13, Y_RNA, SCARNA16, U1, SNORD112, SNORA63, SNORD46, SNORA2, SNORD81, U3, SNORA51, SNORA25, SNORA58, CKS1B, SCARNA20, SNORA67, U6, SNORA70, SNORA77, SNORA26, U8, SCARNA11, SNORA31, SNORA42, SNORA40, SNORD64, ACA64, SNORD78, snoU109, SNORD60, SNORD116	snoU13	chr1	93912688	93913524	chr1_93912688_93913524	837	6	4.5532e-97	2.02201e-07	1.34577e-17	9.57502e-27	-0.00523135	-0.00138373	chr1	91172288	91172337	chr1_91172288_91172337	50	2	1.87497e-12	0.0188194	0.00699173	0.0107396	0.00161514	0.000882884
snoU13, Y_RNA, SCARNA16, U1, SNORD112, SNORA63, SNORD46, SNORA2, SNORD81, U3, SNORA51, SNORA25, SNORA58, CKS1B, SCARNA20, SNORA67, U6, SNORA70, SNORA77, SNORA26, U8, SCARNA11, SNORA31, SNORA42, SNORA40, SNORD64, ACA64, SNORD78, snoU109, SNORD60, SNORD116	snoU13	chr1	93912688	93913524	chr1_93912688_93913524	837	6	4.5532e-97	2.02201e-07	1.34577e-17	9.57502e-27	-0.00523135	-0.00138373	chr1	91190366	91190891	chr1_91190366_91190891	526	5	1.48921e-12	0.00879172	0.0648127	0.0203167	0.002145	0.00146291
snoU13, Y_RNA, SCARNA16, SNORD112, SNORA63, U3, SNORA51, SNORA25, SNORD59, SCARNA20, SNORA67, U6, SNORA70, SNORA77, SNORA26, SNORA72, U8, SNORA31, SNORA40, LMX1A, SNORD78, snoU109, SNORD60, SNORD116	snoU13	chr1	165322784	165327005	chr1_165322784_165327005	4222	21	3.97906e-43	2.20558e-07	3.24985e-15	3.18459e-22	0.00300342	0.0003906	chr1	165204410	165205003	chr1_165204410_165205003	594	9	4.49944e-13	0.00750412	0.105737	0.0176888	0.00215217	0.00108581
TENM4	TENM4	chr11	78980839	78981869	chr11_78980839_78981869	1031	3	3.98937e-29	2.35857e-07	8.20325e-14	6.78409e-13	0.00232699	0.00101825	chr11	79151719	79152112	chr11_79151719_79152112	394	7	1.10371e-13	0.0051832	0.00547467	0.00132716	0.00095253	0.000481009
SNORA69	SNORA69	chr17	43046275	43047971	chr17_43046275_43047971	1697	10	3.48909e-33	2.79936e-07	2.3385e-07	2.54809e-16	0.00200897	0.000511022	chr17	35060451	35060679	chr17_35060451_35060679	229	3	8.90824e-13	1.33307e-05	1.28514e-05	4.089e-06	0.00216258	0.00141697
SNORA69	SNORA69	chr17	43046275	43047971	chr17_43046275_43047971	1697	10	3.48909e-33	2.79936e-07	2.3385e-07	2.54809e-16	0.00200897	0.000511022	chr17	72919704	72920187	chr17_72919704_72920187	484	3	3.75051e-12	0.000701176	0.000442484	0.000341723	0.0010281	0.000843379
SNORA69	SNORA69	chr17	43046275	43047971	chr17_43046275_43047971	1697	10	3.48909e-33	2.79936e-07	2.3385e-07	2.54809e-16	0.00200897	0.000511022	chr17	77783551	77784110	chr17_77783551_77784110	560	3	5.98571e-13	0.000300909	3.20555e-05	6.23801e-06	0.000667662	0.000328229
SNORA38, SNORA8, SNORD28, SNORA20	SNORA38	chr6	106433444	106434623	chr6_106433444_106434623	1180	8	1.51389e-34	3.43026e-07	4.87433e-10	1.24741e-16	0.00246753	0.00060803	chr6	100050506	100051841	chr6_100050506_100051841	1336	11	1.76331e-19	0.00013563	0.0231118	4.12642e-05	0.00113676	0.000571765
SNORA38, SNORA8, SNORD28, SNORA20	SNORA38	chr6	106433444	106434623	chr6_106433444_106434623	1180	8	1.51389e-34	3.43026e-07	4.87433e-10	1.24741e-16	0.00246753	0.00060803	chr6	100912906	100913592	chr6_100912906_100913592	687	6	1.80809e-27	4.28586e-09	3.88355e-06	9.55214e-10	0.00153584	0.00100345
SNORA38, SNORA8, SNORD28, SNORA20	SNORA38	chr6	106433444	106434623	chr6_106433444_106434623	1180	8	1.51389e-34	3.43026e-07	4.87433e-10	1.24741e-16	0.00246753	0.00060803	chr6	105388668	105389599	chr6_105388668_105389599	932	6	5.95507e-16	1.21248e-07	0.000447273	1.48279e-07	0.00466408	0.00225804
SNORD65	SNORD65	chr4	153856503	153857113	chr4_153856503_153857113	611	4	4.44102e-21	3.94532e-07	3.19794e-10	9.02493e-12	0.00144808	0.000441056	chr4	147557774	147558544	chr4_147557774_147558544	771	5	7.67906e-30	3.06944e-07	3.8564e-08	1.42195e-12	0.00301389	0.00222257
SNORD65	SNORD65	chr4	153856503	153857113	chr4_153856503_153857113	611	4	4.44102e-21	3.94532e-07	3.19794e-10	9.02493e-12	0.00144808	0.000441056	chr4	174443366	174443865	chr4_174443366_174443865	500	4	2.23518e-12	0.000740629	0.030307	0.00204937	0.00148324	0.00120957
SNORD36	SNORD36	chr13	113807384	113807930	chr13_113807384_113807930	547	5	4.61328e-15	3.99639e-07	7.22689e-07	2.81288e-08	0.0024169	0.000881536	chr13	112720927	112721425	chr13_112720927_112721425	499	3	5.77784e-13	0.0251202	0.0449875	0.0329645	0.00142367	0.00101572
SNORD36	SNORD36	chr13	95086146	95086158	chr13_95086146_95086158	13	2	1.12562e-08	4.06717e-07	0.000167329	9.96977e-07	0.00211219	0.00156299	chr13	112720927	112721425	chr13_112720927_112721425	499	3	5.77784e-13	0.0251202	0.0449875	0.0329645	0.00142367	0.00101572
SNORA69	SNORA69	chr17	46604235	46604774	chr17_46604235_46604774	540	4	3.42921e-09	4.15126e-07	0.000745407	1.40438e-06	0.00109963	0.000633839	chr17	35060451	35060679	chr17_35060451_35060679	229	3	8.90824e-13	1.33307e-05	1.28514e-05	4.089e-06	0.00216258	0.00141697
SNORA69	SNORA69	chr17	46604235	46604774	chr17_46604235_46604774	540	4	3.42921e-09	4.15126e-07	0.000745407	1.40438e-06	0.00109963	0.000633839	chr17	72919704	72920187	chr17_72919704_72920187	484	3	3.75051e-12	0.000701176	0.000442484	0.000341723	0.0010281	0.000843379
SNORA69	SNORA69	chr17	46604235	46604774	chr17_46604235_46604774	540	4	3.42921e-09	4.15126e-07	0.000745407	1.40438e-06	0.00109963	0.000633839	chr17	77783551	77784110	chr17_77783551_77784110	560	3	5.98571e-13	0.000300909	3.20555e-05	6.23801e-06	0.000667662	0.000328229
DOCK1, FAM196A	DOCK1	chr10	128993115	128993810	chr10_128993115_128993810	696	3	9.29313e-20	4.33424e-07	1.4304e-07	1.36819e-10	0.00255463	0.00103996	chr10	128994030	128995134	chr10_128994030_128995134	1105	9	2.5663e-15	0.000103769	0.0550619	0.00106989	0.00245913	0.00171337
SNORA69	SNORA69	chr17	8905741	8906601	chr17_8905741_8906601	861	7	3.96055e-33	4.50379e-07	2.12703e-08	1.26808e-15	0.00095933	0.000302938	chr17	35060451	35060679	chr17_35060451_35060679	229	3	8.90824e-13	1.33307e-05	1.28514e-05	4.089e-06	0.00216258	0.00141697
SNORA69	SNORA69	chr17	8905741	8906601	chr17_8905741_8906601	861	7	3.96055e-33	4.50379e-07	2.12703e-08	1.26808e-15	0.00095933	0.000302938	chr17	72919704	72920187	chr17_72919704_72920187	484	3	3.75051e-12	0.000701176	0.000442484	0.000341723	0.0010281	0.000843379
SNORA69	SNORA69	chr17	8905741	8906601	chr17_8905741_8906601	861	7	3.96055e-33	4.50379e-07	2.12703e-08	1.26808e-15	0.00095933	0.000302938	chr17	77783551	77784110	chr17_77783551_77784110	560	3	5.98571e-13	0.000300909	3.20555e-05	6.23801e-06	0.000667662	0.000328229
SNORA81, SNORD66, SNORD2, SNORA18, U4	SNORA81	chr3	169754436	169755036	chr3_169754436_169755036	601	2	2.63056e-12	4.60187e-07	7.74828e-07	1.72565e-07	-0.00115702	-0.000425935	chr3	157812226	157812763	chr3_157812226_157812763	538	3	4.13276e-17	2.23573e-05	0.00040082	3.12761e-05	0.00209096	0.00163643
SNORA69	SNORA69	chr17	80346039	80346912	chr17_80346039_80346912	874	4	7.86463e-14	4.69941e-07	4.40403e-06	9.07109e-08	-0.000618475	-0.000528936	chr17	35060451	35060679	chr17_35060451_35060679	229	3	8.90824e-13	1.33307e-05	1.28514e-05	4.089e-06	0.00216258	0.00141697
SNORA69	SNORA69	chr17	80346039	80346912	chr17_80346039_80346912	874	4	7.86463e-14	4.69941e-07	4.40403e-06	9.07109e-08	-0.000618475	-0.000528936	chr17	72919704	72920187	chr17_72919704_72920187	484	3	3.75051e-12	0.000701176	0.000442484	0.000341723	0.0010281	0.000843379
SNORA69	SNORA69	chr17	80346039	80346912	chr17_80346039_80346912	874	4	7.86463e-14	4.69941e-07	4.40403e-06	9.07109e-08	-0.000618475	-0.000528936	chr17	77783551	77784110	chr17_77783551_77784110	560	3	5.98571e-13	0.000300909	3.20555e-05	6.23801e-06	0.000667662	0.000328229
SNORA69	SNORA69	chr17	37911186	37911329	chr17_37911186_37911329	144	2	3.98569e-13	5.27927e-07	6.57336e-08	4.59528e-08	0.000802533	0.000379328	chr17	35060451	35060679	chr17_35060451_35060679	229	3	8.90824e-13	1.33307e-05	1.28514e-05	4.089e-06	0.00216258	0.00141697
SNORA69	SNORA69	chr17	37911186	37911329	chr17_37911186_37911329	144	2	3.98569e-13	5.27927e-07	6.57336e-08	4.59528e-08	0.000802533	0.000379328	chr17	72919704	72920187	chr17_72919704_72920187	484	3	3.75051e-12	0.000701176	0.000442484	0.000341723	0.0010281	0.000843379
SNORA69	SNORA69	chr17	37911186	37911329	chr17_37911186_37911329	144	2	3.98569e-13	5.27927e-07	6.57336e-08	4.59528e-08	0.000802533	0.000379328	chr17	77783551	77784110	chr17_77783551_77784110	560	3	5.98571e-13	0.000300909	3.20555e-05	6.23801e-06	0.000667662	0.000328229
snoU13, Y_RNA, SCARNA16, U1, SNORD112, SNORA63, SNORD46, SNORA2, SNORD81, U3, SNORA51, SNORA25, SNORA58, CKS1B, SCARNA20, SNORA67, U6, SNORA70, SNORA77, SNORA26, U8, SCARNA11, SNORA31, SNORA42, SNORA40, SNORD64, ACA64, SNORD78, snoU109, SNORD60, SNORD116	snoU13	chr1	91194674	91196488	chr1_91194674_91196488	1815	9	6.8844e-36	6.50679e-07	3.62708e-13	3.36116e-15	0.00141407	0.000241544	chr1	91172288	91172337	chr1_91172288_91172337	50	2	1.87497e-12	0.0188194	0.00699173	0.0107396	0.00161514	0.000882884
snoU13, Y_RNA, SCARNA16, U1, SNORD112, SNORA63, SNORD46, SNORA2, SNORD81, U3, SNORA51, SNORA25, SNORA58, CKS1B, SCARNA20, SNORA67, U6, SNORA70, SNORA77, SNORA26, U8, SCARNA11, SNORA31, SNORA42, SNORA40, SNORD64, ACA64, SNORD78, snoU109, SNORD60, SNORD116	snoU13	chr1	91194674	91196488	chr1_91194674_91196488	1815	9	6.8844e-36	6.50679e-07	3.62708e-13	3.36116e-15	0.00141407	0.000241544	chr1	91190366	91190891	chr1_91190366_91190891	526	5	1.48921e-12	0.00879172	0.0648127	0.0203167	0.002145	0.00146291
SNORD36	SNORD36	chr13	114318347	114319334	chr13_114318347_114319334	988	5	1.62308e-11	7.14483e-07	2.24543e-05	1.14553e-07	-0.00118509	-0.000635383	chr13	112720927	112721425	chr13_112720927_112721425	499	3	5.77784e-13	0.0251202	0.0449875	0.0329645	0.00142367	0.00101572
LSP1	LSP1	chr11	2243060	2243685	chr11_2243060_2243685	626	3	6.29236e-15	8.8773e-07	1.69477e-07	5.75253e-08	-0.00118103	-0.000222651	chr11	20184487	20184718	chr11_20184487_20184718	232	3	8.37117e-12	0.0104245	0.0318836	0.0116752	0.00147183	0.00102292
SNORD36, SNORD37	SNORD36	chr13	45451173	45451270	chr13_45451173_45451270	98	2	2.73378e-08	9.29271e-07	0.000149555	2.02278e-06	0.00134911	0.000756254	chr13	53424812	53425257	chr13_53424812_53425257	446	2	8.48653e-13	0.00135367	0.00579132	0.00193353	0.000819326	0.00074089
TWIST1	TWIST1	chr7	19149989	19150174	chr7_19149989_19150174	186	2	2.04678e-08	9.58664e-07	9.64345e-05	1.88932e-06	-0.00217571	-0.00194745	chr7	19156902	19158378	chr7_19156902_19158378	1477	21	2.96666e-28	0.0177355	8.37261e-05	2.79743e-05	0.00140373	0.000428777
SNORA69	SNORA69	chr17	80231639	80232440	chr17_80231639_80232440	802	6	7.15121e-14	9.78829e-07	0.000306344	5.67229e-08	0.00068541	0.000143941	chr17	35060451	35060679	chr17_35060451_35060679	229	3	8.90824e-13	1.33307e-05	1.28514e-05	4.089e-06	0.00216258	0.00141697
SNORA69	SNORA69	chr17	80231639	80232440	chr17_80231639_80232440	802	6	7.15121e-14	9.78829e-07	0.000306344	5.67229e-08	0.00068541	0.000143941	chr17	72919704	72920187	chr17_72919704_72920187	484	3	3.75051e-12	0.000701176	0.000442484	0.000341723	0.0010281	0.000843379
SNORA69	SNORA69	chr17	80231639	80232440	chr17_80231639_80232440	802	6	7.15121e-14	9.78829e-07	0.000306344	5.67229e-08	0.00068541	0.000143941	chr17	77783551	77784110	chr17_77783551_77784110	560	3	5.98571e-13	0.000300909	3.20555e-05	6.23801e-06	0.000667662	0.000328229
SNORD36, SNORD37	SNORD36	chr13	37679951	37681255	chr13_37679951_37681255	1305	5	1.93142e-34	1.09885e-06	4.5088e-10	5.8615e-14	0.00346278	0.000934812	chr13	53424812	53425257	chr13_53424812_53425257	446	2	8.48653e-13	0.00135367	0.00579132	0.00193353	0.000819326	0.00074089
SNORA69	SNORA69	chr17	79359767	79360456	chr17_79359767_79360456	690	3	1.13093e-28	1.22288e-06	2.56327e-12	3.44802e-11	0.00201288	0.000571484	chr17	35060451	35060679	chr17_35060451_35060679	229	3	8.90824e-13	1.33307e-05	1.28514e-05	4.089e-06	0.00216258	0.00141697
SNORA69	SNORA69	chr17	79359767	79360456	chr17_79359767_79360456	690	3	1.13093e-28	1.22288e-06	2.56327e-12	3.44802e-11	0.00201288	0.000571484	chr17	72919704	72920187	chr17_72919704_72920187	484	3	3.75051e-12	0.000701176	0.000442484	0.000341723	0.0010281	0.000843379
SNORA69	SNORA69	chr17	79359767	79360456	chr17_79359767_79360456	690	3	1.13093e-28	1.22288e-06	2.56327e-12	3.44802e-11	0.00201288	0.000571484	chr17	77783551	77784110	chr17_77783551_77784110	560	3	5.98571e-13	0.000300909	3.20555e-05	6.23801e-06	0.000667662	0.000328229
SNORA69	SNORA69	chr17	18011513	18012007	chr17_18011513_18012007	495	3	8.95606e-19	1.33551e-06	1.76953e-08	7.36002e-11	-0.00141619	-0.000118056	chr17	35060451	35060679	chr17_35060451_35060679	229	3	8.90824e-13	1.33307e-05	1.28514e-05	4.089e-06	0.00216258	0.00141697
SNORA69	SNORA69	chr17	18011513	18012007	chr17_18011513_18012007	495	3	8.95606e-19	1.33551e-06	1.76953e-08	7.36002e-11	-0.00141619	-0.000118056	chr17	72919704	72920187	chr17_72919704_72920187	484	3	3.75051e-12	0.000701176	0.000442484	0.000341723	0.0010281	0.000843379
SNORA69	SNORA69	chr17	18011513	18012007	chr17_18011513_18012007	495	3	8.95606e-19	1.33551e-06	1.76953e-08	7.36002e-11	-0.00141619	-0.000118056	chr17	77783551	77784110	chr17_77783551_77784110	560	3	5.98571e-13	0.000300909	3.20555e-05	6.23801e-06	0.000667662	0.000328229
DIXDC1	DIXDC1	chr11	111847475	111848638	chr11_111847475_111848638	1164	12	4.76133e-18	1.38611e-06	7.22172e-07	3.36846e-12	0.000880889	0.000200905	chr11	111848326	111848400	chr11_111848326_111848400	75	2	1.17426e-11	0.00523944	0.0209885	0.00815728	0.00259726	0.00202361
SNORA69	SNORA69	chr17	21356245	21356311	chr17_21356245_21356311	67	2	6.34684e-08	1.49962e-06	0.000471696	3.72437e-06	0.00043863	0.000326361	chr17	35060451	35060679	chr17_35060451_35060679	229	3	8.90824e-13	1.33307e-05	1.28514e-05	4.089e-06	0.00216258	0.00141697
SNORA69	SNORA69	chr17	21356245	21356311	chr17_21356245_21356311	67	2	6.34684e-08	1.49962e-06	0.000471696	3.72437e-06	0.00043863	0.000326361	chr17	72919704	72920187	chr17_72919704_72920187	484	3	3.75051e-12	0.000701176	0.000442484	0.000341723	0.0010281	0.000843379
SNORA69	SNORA69	chr17	21356245	21356311	chr17_21356245_21356311	67	2	6.34684e-08	1.49962e-06	0.000471696	3.72437e-06	0.00043863	0.000326361	chr17	77783551	77784110	chr17_77783551_77784110	560	3	5.98571e-13	0.000300909	3.20555e-05	6.23801e-06	0.000667662	0.000328229
SNORA69	SNORA69	chr17	21221497	21221791	chr17_21221497_21221791	295	2	1.24231e-12	1.58173e-06	5.53499e-07	2.97537e-07	0.00136057	0.00095772	chr17	35060451	35060679	chr17_35060451_35060679	229	3	8.90824e-13	1.33307e-05	1.28514e-05	4.089e-06	0.00216258	0.00141697
SNORA69	SNORA69	chr17	21221497	21221791	chr17_21221497_21221791	295	2	1.24231e-12	1.58173e-06	5.53499e-07	2.97537e-07	0.00136057	0.00095772	chr17	72919704	72920187	chr17_72919704_72920187	484	3	3.75051e-12	0.000701176	0.000442484	0.000341723	0.0010281	0.000843379
SNORA69	SNORA69	chr17	21221497	21221791	chr17_21221497_21221791	295	2	1.24231e-12	1.58173e-06	5.53499e-07	2.97537e-07	0.00136057	0.00095772	chr17	77783551	77784110	chr17_77783551_77784110	560	3	5.98571e-13	0.000300909	3.20555e-05	6.23801e-06	0.000667662	0.000328229
SNORD36	SNORD36	chr13	114074394	114074435	chr13_114074394_114074435	42	2	6.92632e-10	1.59318e-06	3.33482e-06	7.85512e-07	-0.000980191	-0.00079508	chr13	112720927	112721425	chr13_112720927_112721425	499	3	5.77784e-13	0.0251202	0.0449875	0.0329645	0.00142367	0.00101572
HOXC4, snoMe28S-Am2634	HOXC4	chr12	54444047	54444985	chr12_54444047_54444985	939	3	2.38449e-17	1.67727e-06	9.7609e-05	5.02607e-07	0.00131074	0.000789138	chr12	54447807	54448769	chr12_54447807_54448769	963	6	1.02504e-19	0.00158864	8.46217e-06	7.53204e-05	0.00417648	0.00194722
SNORA81, SNORD66, SNORD2, SNORA18, U4	SNORA81	chr3	156848003	156848854	chr3_156848003_156848854	852	7	3.01163e-21	1.732e-06	2.20075e-09	6.23095e-11	0.000699072	0.000319551	chr3	157812226	157812763	chr3_157812226_157812763	538	3	4.13276e-17	2.23573e-05	0.00040082	3.12761e-05	0.00209096	0.00163643
snoU13, Y_RNA, SCARNA16, SCARNA21, U1, SCARNA17, SCARNA18, SNORD112, SNORA62, SNORA63, SNORD46, SNORA2, SNORD81, U3, SNORA51, SCARNA20, SNORA67, U6, SNORA70, SNORA77, SNORA26, U8, SCARNA11, SNORA31, SNORA42, SNORA40, SNORD64, ACA64, snoU109, SNORD60	snoU13	chr1	26248897	26249040	chr1_26248897_26249040	144	2	9.46308e-09	1.96966e-06	0.000227083	4.19553e-06	0.000857535	0.000789406	chr1	26735245	26736154	chr1_26735245_26736154	910	10	1.46723e-20	3.52016e-05	0.0165931	1.96531e-05	0.00195578	0.000790606
SNORD65	SNORD65	chr4	177714350	177715040	chr4_177714350_177715040	691	3	1.02243e-16	2.05129e-06	3.92911e-08	2.04263e-08	0.0022107	0.000814708	chr4	147557774	147558544	chr4_147557774_147558544	771	5	7.67906e-30	3.06944e-07	3.8564e-08	1.42195e-12	0.00301389	0.00222257
SNORD65	SNORD65	chr4	177714350	177715040	chr4_177714350_177715040	691	3	1.02243e-16	2.05129e-06	3.92911e-08	2.04263e-08	0.0022107	0.000814708	chr4	174443366	174443865	chr4_174443366_174443865	500	4	2.23518e-12	0.000740629	0.030307	0.00204937	0.00148324	0.00120957
SNORA69	SNORA69	chr17	37753772	37756091	chr17_37753772_37756091	2320	11	9.81693e-43	2.29044e-06	2.61154e-16	2.58824e-19	0.00133784	0.000268224	chr17	35060451	35060679	chr17_35060451_35060679	229	3	8.90824e-13	1.33307e-05	1.28514e-05	4.089e-06	0.00216258	0.00141697
SNORA69	SNORA69	chr17	37753772	37756091	chr17_37753772_37756091	2320	11	9.81693e-43	2.29044e-06	2.61154e-16	2.58824e-19	0.00133784	0.000268224	chr17	72919704	72920187	chr17_72919704_72920187	484	3	3.75051e-12	0.000701176	0.000442484	0.000341723	0.0010281	0.000843379
SNORA69	SNORA69	chr17	37753772	37756091	chr17_37753772_37756091	2320	11	9.81693e-43	2.29044e-06	2.61154e-16	2.58824e-19	0.00133784	0.000268224	chr17	77783551	77784110	chr17_77783551_77784110	560	3	5.98571e-13	0.000300909	3.20555e-05	6.23801e-06	0.000667662	0.000328229
SNORD36, SNORD37	SNORD36	chr13	34250922	34251239	chr13_34250922_34251239	318	4	1.27018e-17	2.34626e-06	2.28917e-10	1.09967e-09	-0.00366519	-0.00108298	chr13	53424812	53425257	chr13_53424812_53425257	446	2	8.48653e-13	0.00135367	0.00579132	0.00193353	0.000819326	0.00074089
RP11-74E22.4	RP11	chr17	2648524	2649139	chr17_2648524_2649139	616	2	9.30241e-13	2.41532e-06	1.11433e-07	1.35967e-07	-0.00350884	-0.00186085	chr17	2652531	2653188	chr17_2652531_2653188	658	5	7.90524e-14	0.000148936	0.000164567	3.31906e-06	0.00160138	0.000931738
SNORD36	SNORD36	chr13	106063138	106063172	chr13_106063138_106063172	35	3	1.75514e-07	2.47178e-06	0.00341009	1.06502e-05	0.00117155	0.000946955	chr13	112720927	112721425	chr13_112720927_112721425	499	3	5.77784e-13	0.0251202	0.0449875	0.0329645	0.00142367	0.00101572
SNORD74, SNORD50, SNORA11, snoU2_19, SNORD65	SNORD74	chr4	85502665	85503668	chr4_85502665_85503668	1004	3	8.862e-23	2.60027e-06	1.12306e-09	4.12998e-09	0.000376571	0.000265799	chr4	94749496	94749609	chr4_94749496_94749609	114	3	8.01431e-12	0.035886	0.0646947	0.0447508	0.000860844	0.000806866
LSP1	LSP1	chr11	3401204	3401705	chr11_3401204_3401705	502	3	6.6046e-24	2.60716e-06	5.307e-11	2.75253e-10	-0.000760428	-7.47145e-05	chr11	20184487	20184718	chr11_20184487_20184718	232	3	8.37117e-12	0.0104245	0.0318836	0.0116752	0.00147183	0.00102292
SNORA38, SNORA8, SNORD28, EPHA7, SNORA20	SNORA38	chr6	94126141	94126643	chr6_94126141_94126643	503	2	3.17333e-23	2.70074e-06	1.13285e-11	9.89789e-11	0.0016149	0.000796448	chr6	94128527	94129697	chr6_94128527_94129697	1171	12	9.32778e-27	4.35786e-07	0.00159193	1.28738e-08	0.00191082	0.000609419
SNORA69	SNORA69	chr17	36763598	36764185	chr17_36763598_36764185	588	2	8.50675e-08	2.90221e-06	0.000673449	7.08665e-06	-0.000885223	-0.000862339	chr17	35060451	35060679	chr17_35060451_35060679	229	3	8.90824e-13	1.33307e-05	1.28514e-05	4.089e-06	0.00216258	0.00141697
SNORA69	SNORA69	chr17	36763598	36764185	chr17_36763598_36764185	588	2	8.50675e-08	2.90221e-06	0.000673449	7.08665e-06	-0.000885223	-0.000862339	chr17	72919704	72920187	chr17_72919704_72920187	484	3	3.75051e-12	0.000701176	0.000442484	0.000341723	0.0010281	0.000843379
SNORA69	SNORA69	chr17	36763598	36764185	chr17_36763598_36764185	588	2	8.50675e-08	2.90221e-06	0.000673449	7.08665e-06	-0.000885223	-0.000862339	chr17	77783551	77784110	chr17_77783551_77784110	560	3	5.98571e-13	0.000300909	3.20555e-05	6.23801e-06	0.000667662	0.000328229
ALX1, SNORA9, snoMe28S-Am2634	ALX1	chr12	85671811	85674531	chr12_85671811_85674531	2721	17	1.9987e-20	3.07339e-06	5.7983e-08	3.47316e-13	0.00198069	0.000449143	chr12	85673860	85674531	chr12_85673860_85674531	672	8	1.05677e-13	0.00100244	0.0391838	0.00356201	0.000829575	0.000496221
DIXDC1	DIXDC1	chr11	111845646	111846087	chr11_111845646_111846087	442	2	2.00887e-07	3.08314e-06	0.000631846	7.41656e-06	-0.00143961	-0.00112748	chr11	111848326	111848400	chr11_111848326_111848400	75	2	1.17426e-11	0.00523944	0.0209885	0.00815728	0.00259726	0.00202361
SNORD36	SNORD36	chr13	112861499	112861518	chr13_112861499_112861518	20	3	1.65995e-07	3.12206e-06	0.00216505	1.08397e-05	0.00194171	0.00138184	chr13	112720927	112721425	chr13_112720927_112721425	499	3	5.77784e-13	0.0251202	0.0449875	0.0329645	0.00142367	0.00101572
SNORA69	SNORA69	chr17	14201321	14201744	chr17_14201321_14201744	424	2	2.30516e-07	3.15391e-06	0.000529242	7.36914e-06	0.00108967	0.000986601	chr17	35060451	35060679	chr17_35060451_35060679	229	3	8.90824e-13	1.33307e-05	1.28514e-05	4.089e-06	0.00216258	0.00141697
SNORA69	SNORA69	chr17	14201321	14201744	chr17_14201321_14201744	424	2	2.30516e-07	3.15391e-06	0.000529242	7.36914e-06	0.00108967	0.000986601	chr17	72919704	72920187	chr17_72919704_72920187	484	3	3.75051e-12	0.000701176	0.000442484	0.000341723	0.0010281	0.000843379
SNORA69	SNORA69	chr17	14201321	14201744	chr17_14201321_14201744	424	2	2.30516e-07	3.15391e-06	0.000529242	7.36914e-06	0.00108967	0.000986601	chr17	77783551	77784110	chr17_77783551_77784110	560	3	5.98571e-13	0.000300909	3.20555e-05	6.23801e-06	0.000667662	0.000328229
SATB2-AS1, SNORD11, SNORD51, SNORA41, SCARNA6, SNORD39, SNORA75, SNORA48, SATB2, SNORA1, Vault	SATB2	chr2	200324230	200325426	chr2_200324230_200325426	1197	5	1.60152e-38	3.31323e-06	1.30835e-10	3.64417e-16	0.000330495	0.0001066	chr2	200334402	200335148	chr2_200334402_200335148	747	9	4.34833e-13	0.017257	0.0255958	0.0100663	0.00107662	0.000553835
RNF207, snoU13, Y_RNA, SNORD112, SNORA62, U3, SNORA51, SNORA70, SNORA26, U8, RPL22, SNORA31, SNORA42, snoU109, SNORD60	RNF207	chr1	6268790	6269635	chr1_6268790_6269635	846	6	3.90635e-11	3.36592e-06	0.000377477	8.56875e-07	0.00140633	0.000657305	chr1	6266360	6266416	chr1_6266360_6266416	57	2	6.23261e-12	0.000891702	0.000182064	0.000265809	0.000704629	0.000644742
SNORA69	SNORA69	chr17	35423405	35424059	chr17_35423405_35424059	655	6	2.05928e-11	3.86284e-06	6.25544e-05	1.19697e-06	0.00167776	0.000749405	chr17	35060451	35060679	chr17_35060451_35060679	229	3	8.90824e-13	1.33307e-05	1.28514e-05	4.089e-06	0.00216258	0.00141697
SNORA69	SNORA69	chr17	35423405	35424059	chr17_35423405_35424059	655	6	2.05928e-11	3.86284e-06	6.25544e-05	1.19697e-06	0.00167776	0.000749405	chr17	72919704	72920187	chr17_72919704_72920187	484	3	3.75051e-12	0.000701176	0.000442484	0.000341723	0.0010281	0.000843379
SNORA69	SNORA69	chr17	35423405	35424059	chr17_35423405_35424059	655	6	2.05928e-11	3.86284e-06	6.25544e-05	1.19697e-06	0.00167776	0.000749405	chr17	77783551	77784110	chr17_77783551_77784110	560	3	5.98571e-13	0.000300909	3.20555e-05	6.23801e-06	0.000667662	0.000328229
SNORA69	SNORA69	chr17	64297603	64297988	chr17_64297603_64297988	386	3	8.15031e-24	4.43387e-06	1.71202e-12	2.9698e-11	0.00342084	0.00134467	chr17	35060451	35060679	chr17_35060451_35060679	229	3	8.90824e-13	1.33307e-05	1.28514e-05	4.089e-06	0.00216258	0.00141697
SNORA69	SNORA69	chr17	64297603	64297988	chr17_64297603_64297988	386	3	8.15031e-24	4.43387e-06	1.71202e-12	2.9698e-11	0.00342084	0.00134467	chr17	72919704	72920187	chr17_72919704_72920187	484	3	3.75051e-12	0.000701176	0.000442484	0.000341723	0.0010281	0.000843379
SNORA69	SNORA69	chr17	64297603	64297988	chr17_64297603_64297988	386	3	8.15031e-24	4.43387e-06	1.71202e-12	2.9698e-11	0.00342084	0.00134467	chr17	77783551	77784110	chr17_77783551_77784110	560	3	5.98571e-13	0.000300909	3.20555e-05	6.23801e-06	0.000667662	0.000328229
SYNGR3	SYNGR3	chr16	2042466	2043015	chr16_2042466_2043015	550	3	2.04377e-11	4.46396e-06	0.000131301	1.5088e-06	0.00113891	0.00065931	chr16	2041826	2042693	chr16_2041826_2042693	868	5	3.05097e-16	0.00014037	0.00116858	5.97165e-06	0.00142607	0.000663736
SNORD36	SNORD36	chr13	112903015	112904107	chr13_112903015_112904107	1093	6	1.38319e-13	4.63529e-06	2.4776e-05	1.53491e-08	-0.00160157	-0.000698364	chr13	112720927	112721425	chr13_112720927_112721425	499	3	5.77784e-13	0.0251202	0.0449875	0.0329645	0.00142367	0.00101572
GATA4, SNORA7	GATA4	chr8	11560299	11562685	chr8_11560299_11562685	2387	25	3.21299e-18	4.83798e-06	5.89602e-07	3.02683e-10	0.000603341	0.000147773	chr8	11561361	11562367	chr8_11561361_11562367	1007	11	7.09554e-15	0.00939909	0.0590523	0.0123738	0.00119297	0.000585913
PRR18	PRR18	chr6	166720092	166720433	chr6_166720092_166720433	342	3	2.77143e-09	5.06479e-06	0.000103498	4.90182e-06	-0.00115411	-0.000870065	chr6	166720433	166721155	chr6_166720433_166721155	723	4	1.54731e-14	0.00173503	0.00306056	6.28055e-05	0.00191725	0.00120407
SNORA69	SNORA69	chr17	43049442	43049895	chr17_43049442_43049895	454	2	3.08355e-16	5.11152e-06	3.38118e-09	1.3932e-08	0.00148184	0.000933693	chr17	35060451	35060679	chr17_35060451_35060679	229	3	8.90824e-13	1.33307e-05	1.28514e-05	4.089e-06	0.00216258	0.00141697
SNORA69	SNORA69	chr17	43049442	43049895	chr17_43049442_43049895	454	2	3.08355e-16	5.11152e-06	3.38118e-09	1.3932e-08	0.00148184	0.000933693	chr17	72919704	72920187	chr17_72919704_72920187	484	3	3.75051e-12	0.000701176	0.000442484	0.000341723	0.0010281	0.000843379
SNORA69	SNORA69	chr17	43049442	43049895	chr17_43049442_43049895	454	2	3.08355e-16	5.11152e-06	3.38118e-09	1.3932e-08	0.00148184	0.000933693	chr17	77783551	77784110	chr17_77783551_77784110	560	3	5.98571e-13	0.000300909	3.20555e-05	6.23801e-06	0.000667662	0.000328229
SNORA69	SNORA69	chr17	17255427	17255771	chr17_17255427_17255771	345	3	6.42759e-13	5.30673e-06	2.27441e-07	2.339e-08	-0.00139017	-0.000753171	chr17	35060451	35060679	chr17_35060451_35060679	229	3	8.90824e-13	1.33307e-05	1.28514e-05	4.089e-06	0.00216258	0.00141697
SNORA69	SNORA69	chr17	17255427	17255771	chr17_17255427_17255771	345	3	6.42759e-13	5.30673e-06	2.27441e-07	2.339e-08	-0.00139017	-0.000753171	chr17	72919704	72920187	chr17_72919704_72920187	484	3	3.75051e-12	0.000701176	0.000442484	0.000341723	0.0010281	0.000843379
SNORA69	SNORA69	chr17	17255427	17255771	chr17_17255427_17255771	345	3	6.42759e-13	5.30673e-06	2.27441e-07	2.339e-08	-0.00139017	-0.000753171	chr17	77783551	77784110	chr17_77783551_77784110	560	3	5.98571e-13	0.000300909	3.20555e-05	6.23801e-06	0.000667662	0.000328229
SNORD65	SNORD65	chr4	122721721	122722383	chr4_122721721_122722383	663	6	3.62465e-23	5.31522e-06	9.33591e-09	1.67638e-09	-0.00230535	-0.000695346	chr4	147557774	147558544	chr4_147557774_147558544	771	5	7.67906e-30	3.06944e-07	3.8564e-08	1.42195e-12	0.00301389	0.00222257
SNORD65	SNORD65	chr4	122721721	122722383	chr4_122721721_122722383	663	6	3.62465e-23	5.31522e-06	9.33591e-09	1.67638e-09	-0.00230535	-0.000695346	chr4	174443366	174443865	chr4_174443366_174443865	500	4	2.23518e-12	0.000740629	0.030307	0.00204937	0.00148324	0.00120957
snoU13, Y_RNA, SCARNA16, U1, SNORD112, SNORA63, SNORD46, SNORA2, SNORD81, U3, SNORA51, SNORA25, SNORA58, CKS1B, SCARNA20, SNORA67, U6, SNORA70, SNORA77, SNORA26, U8, SCARNA11, SNORA31, SNORA42, SNORA40, SNORD64, ACA64, SNORD78, snoU109, SNORD60, SNORD116	snoU13	chr1	89989507	89990278	chr1_89989507_89990278	772	6	7.65267e-17	5.3412e-06	3.70727e-06	8.32592e-09	0.00159296	0.000300452	chr1	91172288	91172337	chr1_91172288_91172337	50	2	1.87497e-12	0.0188194	0.00699173	0.0107396	0.00161514	0.000882884
snoU13, Y_RNA, SCARNA16, U1, SNORD112, SNORA63, SNORD46, SNORA2, SNORD81, U3, SNORA51, SNORA25, SNORA58, CKS1B, SCARNA20, SNORA67, U6, SNORA70, SNORA77, SNORA26, U8, SCARNA11, SNORA31, SNORA42, SNORA40, SNORD64, ACA64, SNORD78, snoU109, SNORD60, SNORD116	snoU13	chr1	89989507	89990278	chr1_89989507_89990278	772	6	7.65267e-17	5.3412e-06	3.70727e-06	8.32592e-09	0.00159296	0.000300452	chr1	91190366	91190891	chr1_91190366_91190891	526	5	1.48921e-12	0.00879172	0.0648127	0.0203167	0.002145	0.00146291
SNORA69	SNORA69	chr17	59494040	59494444	chr17_59494040_59494444	405	4	6.29764e-17	5.47287e-06	5.83898e-08	1.26102e-09	0.00192548	0.000552904	chr17	35060451	35060679	chr17_35060451_35060679	229	3	8.90824e-13	1.33307e-05	1.28514e-05	4.089e-06	0.00216258	0.00141697
SNORA69	SNORA69	chr17	59494040	59494444	chr17_59494040_59494444	405	4	6.29764e-17	5.47287e-06	5.83898e-08	1.26102e-09	0.00192548	0.000552904	chr17	72919704	72920187	chr17_72919704_72920187	484	3	3.75051e-12	0.000701176	0.000442484	0.000341723	0.0010281	0.000843379
SNORA69	SNORA69	chr17	59494040	59494444	chr17_59494040_59494444	405	4	6.29764e-17	5.47287e-06	5.83898e-08	1.26102e-09	0.00192548	0.000552904	chr17	77783551	77784110	chr17_77783551_77784110	560	3	5.98571e-13	0.000300909	3.20555e-05	6.23801e-06	0.000667662	0.000328229
SNORD36, SNORD37	SNORD36	chr13	43597297	43597331	chr13_43597297_43597331	35	2	5.64094e-08	5.53362e-06	0.000157496	8.98627e-06	0.00228388	0.00190075	chr13	53424812	53425257	chr13_53424812_53425257	446	2	8.48653e-13	0.00135367	0.00579132	0.00193353	0.000819326	0.00074089
SNORA69	SNORA69	chr17	46824292	46825371	chr17_46824292_46825371	1080	5	1.32755e-78	5.72527e-06	1.90773e-22	8.88358e-20	0.00100546	0.000291314	chr17	35060451	35060679	chr17_35060451_35060679	229	3	8.90824e-13	1.33307e-05	1.28514e-05	4.089e-06	0.00216258	0.00141697
SNORA69	SNORA69	chr17	46824292	46825371	chr17_46824292_46825371	1080	5	1.32755e-78	5.72527e-06	1.90773e-22	8.88358e-20	0.00100546	0.000291314	chr17	72919704	72920187	chr17_72919704_72920187	484	3	3.75051e-12	0.000701176	0.000442484	0.000341723	0.0010281	0.000843379
SNORA69	SNORA69	chr17	46824292	46825371	chr17_46824292_46825371	1080	5	1.32755e-78	5.72527e-06	1.90773e-22	8.88358e-20	0.00100546	0.000291314	chr17	77783551	77784110	chr17_77783551_77784110	560	3	5.98571e-13	0.000300909	3.20555e-05	6.23801e-06	0.000667662	0.000328229
LSP1	LSP1	chr11	2211039	2212133	chr11_2211039_2212133	1095	5	1.20474e-09	5.95349e-06	5.40095e-05	3.7563e-07	0.00139707	0.000555973	chr11	20184487	20184718	chr11_20184487_20184718	232	3	8.37117e-12	0.0104245	0.0318836	0.0116752	0.00147183	0.00102292
SNORA69	SNORA69	chr17	41479473	41479663	chr17_41479473_41479663	191	2	1.25755e-11	6.11141e-06	5.03583e-08	1.16172e-07	-0.0013009	-0.000508116	chr17	35060451	35060679	chr17_35060451_35060679	229	3	8.90824e-13	1.33307e-05	1.28514e-05	4.089e-06	0.00216258	0.00141697
SNORA69	SNORA69	chr17	41479473	41479663	chr17_41479473_41479663	191	2	1.25755e-11	6.11141e-06	5.03583e-08	1.16172e-07	-0.0013009	-0.000508116	chr17	72919704	72920187	chr17_72919704_72920187	484	3	3.75051e-12	0.000701176	0.000442484	0.000341723	0.0010281	0.000843379
SNORA69	SNORA69	chr17	41479473	41479663	chr17_41479473_41479663	191	2	1.25755e-11	6.11141e-06	5.03583e-08	1.16172e-07	-0.0013009	-0.000508116	chr17	77783551	77784110	chr17_77783551_77784110	560	3	5.98571e-13	0.000300909	3.20555e-05	6.23801e-06	0.000667662	0.000328229
SNORA69	SNORA69	chr17	54655317	54655325	chr17_54655317_54655325	9	2	6.41465e-08	6.13028e-06	2.93236e-05	5.24421e-06	0.000591748	0.000436217	chr17	35060451	35060679	chr17_35060451_35060679	229	3	8.90824e-13	1.33307e-05	1.28514e-05	4.089e-06	0.00216258	0.00141697
SNORA69	SNORA69	chr17	54655317	54655325	chr17_54655317_54655325	9	2	6.41465e-08	6.13028e-06	2.93236e-05	5.24421e-06	0.000591748	0.000436217	chr17	72919704	72920187	chr17_72919704_72920187	484	3	3.75051e-12	0.000701176	0.000442484	0.000341723	0.0010281	0.000843379
SNORA69	SNORA69	chr17	54655317	54655325	chr17_54655317_54655325	9	2	6.41465e-08	6.13028e-06	2.93236e-05	5.24421e-06	0.000591748	0.000436217	chr17	77783551	77784110	chr17_77783551_77784110	560	3	5.98571e-13	0.000300909	3.20555e-05	6.23801e-06	0.000667662	0.000328229
SNORD36, SOX21	SNORD36	chr13	95362829	95363371	chr13_95362829_95363371	543	4	3.54225e-08	6.4632e-06	0.00535224	2.05794e-05	0.000450293	0.000264004	chr13	95363371	95364915	chr13_95363371_95364915	1545	13	1.90774e-25	3.58993e-05	0.00149016	2.89575e-06	0.00155194	0.000699484
SNORA11, PITX2, SNORD65	SNORA11	chr4	111554385	111555102	chr4_111554385_111555102	718	4	1.13819e-09	6.6551e-06	0.00158834	9.21897e-06	0.00151556	0.000983341	chr4	111543401	111544463	chr4_111543401_111544463	1063	9	7.52494e-14	0.000648606	0.050717	0.00187374	0.00209458	0.000813929
SNORD36, IRS2	SNORD36	chr13	110431612	110432220	chr13_110431612_110432220	609	3	5.18843e-13	7.31855e-06	1.98311e-05	4.02286e-08	0.00287813	0.00131373	chr13	110438256	110439234	chr13_110438256_110439234	979	10	3.1314e-16	0.00027152	0.0333572	0.000967487	0.00244189	0.000825794
SNORA69	SNORA69	chr17	39624076	39624088	chr17_39624076_39624088	13	2	7.02715e-08	7.83762e-06	0.00011239	1.05588e-05	-0.0012822	-0.00101464	chr17	35060451	35060679	chr17_35060451_35060679	229	3	8.90824e-13	1.33307e-05	1.28514e-05	4.089e-06	0.00216258	0.00141697
SNORA69	SNORA69	chr17	39624076	39624088	chr17_39624076_39624088	13	2	7.02715e-08	7.83762e-06	0.00011239	1.05588e-05	-0.0012822	-0.00101464	chr17	72919704	72920187	chr17_72919704_72920187	484	3	3.75051e-12	0.000701176	0.000442484	0.000341723	0.0010281	0.000843379
SNORA69	SNORA69	chr17	39624076	39624088	chr17_39624076_39624088	13	2	7.02715e-08	7.83762e-06	0.00011239	1.05588e-05	-0.0012822	-0.00101464	chr17	77783551	77784110	chr17_77783551_77784110	560	3	5.98571e-13	0.000300909	3.20555e-05	6.23801e-06	0.000667662	0.000328229
SNORD36, SNORD37	SNORD36	chr13	37247537	37247708	chr13_37247537_37247708	172	2	3.99583e-08	7.96259e-06	0.00033537	1.48261e-05	0.000829316	0.000771582	chr13	53424812	53425257	chr13_53424812_53425257	446	2	8.48653e-13	0.00135367	0.00579132	0.00193353	0.000819326	0.00074089
SNORD65	SNORD65	chr4	174439990	174440681	chr4_174439990_174440681	692	5	6.96525e-22	8.15862e-06	4.83739e-08	1.44274e-10	0.00158623	0.000342556	chr4	147557774	147558544	chr4_147557774_147558544	771	5	7.67906e-30	3.06944e-07	3.8564e-08	1.42195e-12	0.00301389	0.00222257
SNORD65	SNORD65	chr4	174439990	174440681	chr4_174439990_174440681	692	5	6.96525e-22	8.15862e-06	4.83739e-08	1.44274e-10	0.00158623	0.000342556	chr4	174443366	174443865	chr4_174443366_174443865	500	4	2.23518e-12	0.000740629	0.030307	0.00204937	0.00148324	0.00120957
SNORA38, SNORA8, SNORD28, SIM1, SNORA20	SNORA38	chr6	100895050	100897309	chr6_100895050_100897309	2260	14	1.18241e-10	9.44296e-06	5.85817e-05	1.56478e-09	0.00154149	0.00039375	chr6	100903227	100903575	chr6_100903227_100903575	349	3	6.01524e-12	0.0292306	0.0113734	0.0174458	0.00190495	0.00111523
SNORA69	SNORA69	chr17	46570458	46570504	chr17_46570458_46570504	47	2	4.92695e-07	9.63562e-06	0.000532165	1.93846e-05	0.000999055	0.000944445	chr17	35060451	35060679	chr17_35060451_35060679	229	3	8.90824e-13	1.33307e-05	1.28514e-05	4.089e-06	0.00216258	0.00141697
SNORA69	SNORA69	chr17	46570458	46570504	chr17_46570458_46570504	47	2	4.92695e-07	9.63562e-06	0.000532165	1.93846e-05	0.000999055	0.000944445	chr17	72919704	72920187	chr17_72919704_72920187	484	3	3.75051e-12	0.000701176	0.000442484	0.000341723	0.0010281	0.000843379
SNORA69	SNORA69	chr17	46570458	46570504	chr17_46570458_46570504	47	2	4.92695e-07	9.63562e-06	0.000532165	1.93846e-05	0.000999055	0.000944445	chr17	77783551	77784110	chr17_77783551_77784110	560	3	5.98571e-13	0.000300909	3.20555e-05	6.23801e-06	0.000667662	0.000328229
SNORA38, SNORA8, SNORD28, SNORA20	SNORA38	chr6	99291343	99293292	chr6_99291343_99293292	1950	15	2.58017e-22	9.89581e-06	6.53395e-09	2.41087e-11	0.000918186	0.000113882	chr6	100050506	100051841	chr6_100050506_100051841	1336	11	1.76331e-19	0.00013563	0.0231118	4.12642e-05	0.00113676	0.000571765
SNORA38, SNORA8, SNORD28, SNORA20	SNORA38	chr6	99291343	99293292	chr6_99291343_99293292	1950	15	2.58017e-22	9.89581e-06	6.53395e-09	2.41087e-11	0.000918186	0.000113882	chr6	100912906	100913592	chr6_100912906_100913592	687	6	1.80809e-27	4.28586e-09	3.88355e-06	9.55214e-10	0.00153584	0.00100345
SNORA38, SNORA8, SNORD28, SNORA20	SNORA38	chr6	99291343	99293292	chr6_99291343_99293292	1950	15	2.58017e-22	9.89581e-06	6.53395e-09	2.41087e-11	0.000918186	0.000113882	chr6	105388668	105389599	chr6_105388668_105389599	932	6	5.95507e-16	1.21248e-07	0.000447273	1.48279e-07	0.00466408	0.00225804
SNORA38, SNORA8, SNORD28, SNORA20	SNORA38	chr6	89828172	89828674	chr6_89828172_89828674	503	2	2.83148e-19	9.96775e-06	2.41141e-09	1.27355e-08	0.00157681	0.000668285	chr6	100050506	100051841	chr6_100050506_100051841	1336	11	1.76331e-19	0.00013563	0.0231118	4.12642e-05	0.00113676	0.000571765
SNORA38, SNORA8, SNORD28, SNORA20	SNORA38	chr6	89828172	89828674	chr6_89828172_89828674	503	2	2.83148e-19	9.96775e-06	2.41141e-09	1.27355e-08	0.00157681	0.000668285	chr6	100912906	100913592	chr6_100912906_100913592	687	6	1.80809e-27	4.28586e-09	3.88355e-06	9.55214e-10	0.00153584	0.00100345
SNORA38, SNORA8, SNORD28, SNORA20	SNORA38	chr6	89828172	89828674	chr6_89828172_89828674	503	2	2.83148e-19	9.96775e-06	2.41141e-09	1.27355e-08	0.00157681	0.000668285	chr6	105388668	105389599	chr6_105388668_105389599	932	6	5.95507e-16	1.21248e-07	0.000447273	1.48279e-07	0.00466408	0.00225804
SNORA11, PITX2, SNORD65	SNORA11	chr4	111541339	111543401	chr4_111541339_111543401	2063	8	6.57077e-21	9.99795e-06	2.52921e-09	8.45061e-11	0.00169209	0.00053446	chr4	111543401	111544463	chr4_111543401_111544463	1063	9	7.52494e-14	0.000648606	0.050717	0.00187374	0.00209458	0.000813929
SNORA69	SNORA69	chr17	79701478	79701610	chr17_79701478_79701610	133	3	5.32347e-19	1.06638e-05	1.05665e-11	2.3248e-10	-0.0019656	-0.000735077	chr17	35060451	35060679	chr17_35060451_35060679	229	3	8.90824e-13	1.33307e-05	1.28514e-05	4.089e-06	0.00216258	0.00141697
SNORA69	SNORA69	chr17	79701478	79701610	chr17_79701478_79701610	133	3	5.32347e-19	1.06638e-05	1.05665e-11	2.3248e-10	-0.0019656	-0.000735077	chr17	72919704	72920187	chr17_72919704_72920187	484	3	3.75051e-12	0.000701176	0.000442484	0.000341723	0.0010281	0.000843379
SNORA69	SNORA69	chr17	79701478	79701610	chr17_79701478_79701610	133	3	5.32347e-19	1.06638e-05	1.05665e-11	2.3248e-10	-0.0019656	-0.000735077	chr17	77783551	77784110	chr17_77783551_77784110	560	3	5.98571e-13	0.000300909	3.20555e-05	6.23801e-06	0.000667662	0.000328229
SNORD36	SNORD36	chr13	112815083	112815899	chr13_112815083_112815899	817	5	3.41951e-21	1.12204e-05	9.14895e-08	6.601e-10	0.00233282	0.000979784	chr13	112720927	112721425	chr13_112720927_112721425	499	3	5.77784e-13	0.0251202	0.0449875	0.0329645	0.00142367	0.00101572
snoU13, Y_RNA, SCARNA16, U1, SNORD112, SNORA63, SNORD46, SNORA2, SNORD81, U3, SNORA51, SNORA25, SNORA58, CKS1B, SCARNA20, SNORA67, U6, SNORA70, SNORA77, SNORA26, SNORA72, U8, SCARNA11, SNORA31, SNORA42, NHLH2, SNORA40, SNORD64, ACA64, SNORD78, snoU109, SNORD60, SNORD116	snoU13	chr1	116382096	116382363	chr1_116382096_116382363	268	3	5.41323e-10	1.16457e-05	0.000436036	4.70177e-06	0.000178467	0.000123849	chr1	116380946	116381475	chr1_116380946_116381475	530	5	1.87432e-14	0.000635008	0.0212139	0.00205023	0.00145738	0.000831992
SNORA69	SNORA69	chr17	62398356	62398693	chr17_62398356_62398693	338	4	4.61364e-14	1.26342e-05	3.20244e-08	2.40228e-08	-0.00131233	-0.000266023	chr17	35060451	35060679	chr17_35060451_35060679	229	3	8.90824e-13	1.33307e-05	1.28514e-05	4.089e-06	0.00216258	0.00141697
SNORA69	SNORA69	chr17	62398356	62398693	chr17_62398356_62398693	338	4	4.61364e-14	1.26342e-05	3.20244e-08	2.40228e-08	-0.00131233	-0.000266023	chr17	72919704	72920187	chr17_72919704_72920187	484	3	3.75051e-12	0.000701176	0.000442484	0.000341723	0.0010281	0.000843379
SNORA69	SNORA69	chr17	62398356	62398693	chr17_62398356_62398693	338	4	4.61364e-14	1.26342e-05	3.20244e-08	2.40228e-08	-0.00131233	-0.000266023	chr17	77783551	77784110	chr17_77783551_77784110	560	3	5.98571e-13	0.000300909	3.20555e-05	6.23801e-06	0.000667662	0.000328229
BHMT, snoZ6, SNORA27, SNORA68, RPS23P5, SNORA57, 7SK, DMGDH, SNORD45	BHMT	chr5	78407153	78407683	chr5_78407153_78407683	531	7	4.43976e-11	1.5467e-05	0.00112948	1.76154e-06	0.000888006	0.000215379	chr5	78407418	78408347	chr5_78407418_78408347	930	9	5.37585e-14	3.65649e-05	0.0705046	0.000553425	0.00237145	0.00166737
SNORA69	SNORA69	chr17	74864041	74864302	chr17_74864041_74864302	262	4	1.42876e-08	1.61562e-05	0.00160355	7.52583e-06	0.000789357	0.00043756	chr17	35060451	35060679	chr17_35060451_35060679	229	3	8.90824e-13	1.33307e-05	1.28514e-05	4.089e-06	0.00216258	0.00141697
SNORA69	SNORA69	chr17	74864041	74864302	chr17_74864041_74864302	262	4	1.42876e-08	1.61562e-05	0.00160355	7.52583e-06	0.000789357	0.00043756	chr17	72919704	72920187	chr17_72919704_72920187	484	3	3.75051e-12	0.000701176	0.000442484	0.000341723	0.0010281	0.000843379
SNORA69	SNORA69	chr17	74864041	74864302	chr17_74864041_74864302	262	4	1.42876e-08	1.61562e-05	0.00160355	7.52583e-06	0.000789357	0.00043756	chr17	77783551	77784110	chr17_77783551_77784110	560	3	5.98571e-13	0.000300909	3.20555e-05	6.23801e-06	0.000667662	0.000328229
SNORA73, SNORA64, SNORD75, SNORA74, snR65, 5S_rRNA, SCARNA6, SNORD39, SNORD18, SNORA36, SNORA75, SNORA48, SNORD56, SNORA43, SNORA1, Vault	SNORA73	chr2	43863435	43864340	chr2_43863435_43864340	906	8	3.29211e-39	1.66136e-05	2.65104e-09	1.07067e-14	-0.00167547	-0.000529405	chr2	43020129	43020264	chr2_43020129_43020264	136	3	1.49848e-11	0.00652806	0.0156706	0.00886975	0.00177091	0.000805603
SNORA69	SNORA69	chr17	46832247	46832919	chr17_46832247_46832919	673	3	2.67889e-08	1.70584e-05	0.000863171	2.73505e-05	-0.000733427	-0.000159132	chr17	35060451	35060679	chr17_35060451_35060679	229	3	8.90824e-13	1.33307e-05	1.28514e-05	4.089e-06	0.00216258	0.00141697
SNORA69	SNORA69	chr17	46832247	46832919	chr17_46832247_46832919	673	3	2.67889e-08	1.70584e-05	0.000863171	2.73505e-05	-0.000733427	-0.000159132	chr17	72919704	72920187	chr17_72919704_72920187	484	3	3.75051e-12	0.000701176	0.000442484	0.000341723	0.0010281	0.000843379
SNORA69	SNORA69	chr17	46832247	46832919	chr17_46832247_46832919	673	3	2.67889e-08	1.70584e-05	0.000863171	2.73505e-05	-0.000733427	-0.000159132	chr17	77783551	77784110	chr17_77783551_77784110	560	3	5.98571e-13	0.000300909	3.20555e-05	6.23801e-06	0.000667662	0.000328229
snoU13, Y_RNA, SCARNA16, U1, SNORD112, SNORA63, SNORD46, SNORA2, SNORD81, U3, SNORA51, SNORA25, SNORA58, CKS1B, SCARNA20, SNORA67, U6, SNORA70, SNORA77, SNORA26, U8, SCARNA11, SNORA31, SNORA42, SNORA40, SNORD64, ACA64, SNORD78, snoU109, SNORD60, SNORD116	snoU13	chr1	95009677	95010070	chr1_95009677_95010070	394	2	2.61252e-09	1.80051e-05	3.6725e-06	3.38287e-06	-0.00194979	-0.000683174	chr1	91172288	91172337	chr1_91172288_91172337	50	2	1.87497e-12	0.0188194	0.00699173	0.0107396	0.00161514	0.000882884
snoU13, Y_RNA, SCARNA16, U1, SNORD112, SNORA63, SNORD46, SNORA2, SNORD81, U3, SNORA51, SNORA25, SNORA58, CKS1B, SCARNA20, SNORA67, U6, SNORA70, SNORA77, SNORA26, U8, SCARNA11, SNORA31, SNORA42, SNORA40, SNORD64, ACA64, SNORD78, snoU109, SNORD60, SNORD116	snoU13	chr1	95009677	95010070	chr1_95009677_95010070	394	2	2.61252e-09	1.80051e-05	3.6725e-06	3.38287e-06	-0.00194979	-0.000683174	chr1	91190366	91190891	chr1_91190366_91190891	526	5	1.48921e-12	0.00879172	0.0648127	0.0203167	0.002145	0.00146291
SNORD36	SNORD36	chr13	112507698	112508206	chr13_112507698_112508206	509	5	2.94189e-11	1.80989e-05	0.000139987	2.1897e-07	-0.00129995	-0.000588808	chr13	112720927	112721425	chr13_112720927_112721425	499	3	5.77784e-13	0.0251202	0.0449875	0.0329645	0.00142367	0.00101572
snoZ6, SNORA27, SNORA68, RPS23P5, SNORA57, 7SK, OTP, SNORD45	snoZ6	chr5	76932016	76932526	chr5_76932016_76932526	511	4	3.93533e-08	1.82422e-05	0.00150156	3.19355e-05	0.000268663	0.000161821	chr5	76926079	76926752	chr5_76926079_76926752	674	4	4.79854e-21	3.00205e-07	1.61194e-06	5.35936e-08	0.00203406	0.000935838
SNORD74, SNORD50, SNORA11, snoU2_19, SNORD65	SNORD74	chr4	85405132	85405618	chr4_85405132_85405618	487	3	1.7712e-10	1.82542e-05	4.79242e-05	8.33575e-07	0.00127938	0.000787454	chr4	94749496	94749609	chr4_94749496_94749609	114	3	8.01431e-12	0.035886	0.0646947	0.0447508	0.000860844	0.000806866
SNORA30, PAX5	SNORA30	chr9	36881908	36882152	chr9_36881908_36882152	245	2	9.01452e-12	1.87342e-05	4.27874e-08	1.52665e-07	0.00141635	0.000881378	chr9	37027267	37027815	chr9_37027267_37027815	549	4	1.10388e-13	0.000361341	0.00015784	2.40958e-05	0.00166668	0.000697342
SPAG6	SPAG6	chr10	22725204	22725885	chr10_22725204_22725885	682	5	1.60478e-13	1.91416e-05	5.55288e-07	1.25782e-07	0.00170022	0.000515423	chr10	22633916	22635028	chr10_22633916_22635028	1113	14	1.02225e-29	6.00569e-08	0.0109691	8.69279e-08	0.00269596	0.00133368
snoU13, Y_RNA, SCARNA16, U1, SNORD112, SNORA63, SNORD46, SNORA2, SNORD81, U3, SNORA51, SNORA25, SNORA58, CKS1B, SCARNA20, SNORA67, U6, SNORA70, SNORA77, SNORA26, U8, SCARNA11, SNORA31, SNORA42, SNORA40, SNORD64, ACA64, SNORD78, snoU109, SNORD60, SNORD116	snoU13	chr1	92494898	92495342	chr1_92494898_92495342	445	4	2.46259e-16	2.06697e-05	3.036e-07	5.78148e-09	0.00132332	0.000647654	chr1	91172288	91172337	chr1_91172288_91172337	50	2	1.87497e-12	0.0188194	0.00699173	0.0107396	0.00161514	0.000882884
snoU13, Y_RNA, SCARNA16, U1, SNORD112, SNORA63, SNORD46, SNORA2, SNORD81, U3, SNORA51, SNORA25, SNORA58, CKS1B, SCARNA20, SNORA67, U6, SNORA70, SNORA77, SNORA26, U8, SCARNA11, SNORA31, SNORA42, SNORA40, SNORD64, ACA64, SNORD78, snoU109, SNORD60, SNORD116	snoU13	chr1	92494898	92495342	chr1_92494898_92495342	445	4	2.46259e-16	2.06697e-05	3.036e-07	5.78148e-09	0.00132332	0.000647654	chr1	91190366	91190891	chr1_91190366_91190891	526	5	1.48921e-12	0.00879172	0.0648127	0.0203167	0.002145	0.00146291
SNORD36, PDX1, PDX1-AS1, SNORA16, SNORD37	SNORD36	chr13	28491809	28494177	chr13_28491809_28494177	2369	17	8.94396e-36	2.14695e-05	3.13275e-11	4.49113e-15	0.0017163	0.000166121	chr13	28493404	28494996	chr13_28493404_28494996	1593	11	1.103e-16	0.00154536	0.0185556	0.000347273	0.00124826	0.000668552
SOWAHA, SNORA27, SNORA68, SNORA57, 7SK, SNORD45, SNORD95	SOWAHA	chr5	132150904	132151047	chr5_132150904_132151047	144	2	5.04135e-08	2.23899e-05	3.88434e-05	1.40679e-05	0.000317795	0.000288832	chr5	132150117	132150128	chr5_132150117_132150128	12	2	8.99166e-13	9.46513e-06	0.000982412	2.14955e-05	0.0032072	0.00242221
PCBP3	PCBP3	chr21	47294981	47295375	chr21_47294981_47295375	395	3	8.58707e-10	2.48472e-05	3.28825e-05	1.5428e-06	0.00105206	0.000779753	chr21	47063285	47064307	chr21_47063285_47064307	1023	6	4.50289e-17	0.000940579	0.000471949	1.10598e-05	0.00149487	0.000551873
SNORD36	SNORD36	chr13	112818938	112819420	chr13_112818938_112819420	483	2	3.30501e-11	2.52194e-05	3.54479e-07	8.27088e-07	-0.00132168	-0.000706636	chr13	112720927	112721425	chr13_112720927_112721425	499	3	5.77784e-13	0.0251202	0.0449875	0.0329645	0.00142367	0.00101572
SNORD36, SNORD37	SNORD36	chr13	40746370	40747228	chr13_40746370_40747228	859	4	6.10584e-10	2.57357e-05	0.000136459	5.31739e-07	0.0013237	0.000137298	chr13	53424812	53425257	chr13_53424812_53425257	446	2	8.48653e-13	0.00135367	0.00579132	0.00193353	0.000819326	0.00074089
SNORA38, SNORA8, SNORD28, SNORA20	SNORA38	chr6	100913250	100915805	chr6_100913250_100915805	2556	14	2.19771e-31	2.63945e-05	1.14981e-09	1.5579e-18	0.000580812	0.000116413	chr6	100050506	100051841	chr6_100050506_100051841	1336	11	1.76331e-19	0.00013563	0.0231118	4.12642e-05	0.00113676	0.000571765
SNORA38, SNORA8, SNORD28, SNORA20	SNORA38	chr6	100913250	100915805	chr6_100913250_100915805	2556	14	2.19771e-31	2.63945e-05	1.14981e-09	1.5579e-18	0.000580812	0.000116413	chr6	100912906	100913592	chr6_100912906_100913592	687	6	1.80809e-27	4.28586e-09	3.88355e-06	9.55214e-10	0.00153584	0.00100345
SNORA38, SNORA8, SNORD28, SNORA20	SNORA38	chr6	100913250	100915805	chr6_100913250_100915805	2556	14	2.19771e-31	2.63945e-05	1.14981e-09	1.5579e-18	0.000580812	0.000116413	chr6	105388668	105389599	chr6_105388668_105389599	932	6	5.95507e-16	1.21248e-07	0.000447273	1.48279e-07	0.00466408	0.00225804
HOXD11, SNORA4, SNORD11, SNORD51, SNORA41, SCARNA6, SNORD39, SNORA75, ACA59, SNORA48, SNORA43, SNORA1, Vault	HOXD11	chr2	176971304	176971355	chr2_176971304_176971355	52	3	1.48285e-09	2.67336e-05	0.000117005	1.60937e-05	0.000232433	0.000128175	chr2	176971304	176972812	chr2_176971304_176972812	1509	12	1.31271e-25	2.64626e-06	0.000562223	9.55985e-07	0.0030461	0.00124682
SNORD36	SNORD36	chr13	76444798	76445108	chr13_76444798_76445108	311	5	8.44021e-15	2.7162e-05	9.54675e-09	7.26337e-08	-0.00195928	-0.000789034	chr13	112720927	112721425	chr13_112720927_112721425	499	3	5.77784e-13	0.0251202	0.0449875	0.0329645	0.00142367	0.00101572
snoU13, Y_RNA, SCARNA16, SNORD112, SNORA63, U3, SNORA51, SNORA25, TUFT1, RP11-74C1.4, SNORA58, CKS1B, SCARNA20, SNORA67, U6, SNORA70, SNORA77, SNORA26, SNORA72, U8, SNORA31, SNORA42, SNORA40, SCARNA4, SNORD64, ACA64, SNORD78, snoU109, SNORD60, SNORD116	snoU13	chr1	151512215	151513502	chr1_151512215_151513502	1288	11	5.77245e-38	2.79257e-05	1.31025e-10	5.51529e-17	0.000947173	6.14505e-05	chr1	151512592	151513198	chr1_151512592_151513198	607	7	2.28316e-13	0.0091832	0.00113135	0.000524465	0.00145509	0.000458348
SNORD36	SNORD36	chr13	100583767	100583847	chr13_100583767_100583847	81	2	3.25187e-11	2.91983e-05	4.18277e-08	1.71855e-07	0.00127664	0.000759777	chr13	112720927	112721425	chr13_112720927_112721425	499	3	5.77784e-13	0.0251202	0.0449875	0.0329645	0.00142367	0.00101572
SNORA81, SNORD66, SNORD2, SNORA18, U4	SNORA81	chr3	155587661	155587952	chr3_155587661_155587952	292	2	8.45705e-10	3.33557e-05	1.73871e-06	2.81908e-06	-0.00131111	-0.000604787	chr3	157812226	157812763	chr3_157812226_157812763	538	3	4.13276e-17	2.23573e-05	0.00040082	3.12761e-05	0.00209096	0.00163643
PODXL2, SNORA33, SNORA81, SNORD66, SNORD2, SNORD5, SNORD63, SNORD61, SNORA24, Metazoa_SRP, SNORA18, U4	PODXL2	chr3	127347343	127348155	chr3_127347343_127348155	813	9	3.21836e-67	3.54156e-05	2.82266e-15	8.40788e-21	-0.00319263	-0.000654295	chr3	127347343	127348611	chr3_127347343_127348611	1269	10	2.86296e-27	0.0391474	4.29036e-06	6.42113e-08	0.00175151	0.00061069
SNORA69	SNORA69	chr17	81014091	81014667	chr17_81014091_81014667	577	2	3.66062e-16	3.58085e-05	6.53429e-09	3.95665e-08	-0.00211786	-0.00157043	chr17	35060451	35060679	chr17_35060451_35060679	229	3	8.90824e-13	1.33307e-05	1.28514e-05	4.089e-06	0.00216258	0.00141697
SNORA69	SNORA69	chr17	81014091	81014667	chr17_81014091_81014667	577	2	3.66062e-16	3.58085e-05	6.53429e-09	3.95665e-08	-0.00211786	-0.00157043	chr17	72919704	72920187	chr17_72919704_72920187	484	3	3.75051e-12	0.000701176	0.000442484	0.000341723	0.0010281	0.000843379
SNORA69	SNORA69	chr17	81014091	81014667	chr17_81014091_81014667	577	2	3.66062e-16	3.58085e-05	6.53429e-09	3.95665e-08	-0.00211786	-0.00157043	chr17	77783551	77784110	chr17_77783551_77784110	560	3	5.98571e-13	0.000300909	3.20555e-05	6.23801e-06	0.000667662	0.000328229
SNORA69	SNORA69	chr17	75955658	75956447	chr17_75955658_75956447	790	5	1.9665e-54	3.68433e-05	8.41369e-19	6.98673e-17	0.00243956	0.00056055	chr17	35060451	35060679	chr17_35060451_35060679	229	3	8.90824e-13	1.33307e-05	1.28514e-05	4.089e-06	0.00216258	0.00141697
SNORA69	SNORA69	chr17	75955658	75956447	chr17_75955658_75956447	790	5	1.9665e-54	3.68433e-05	8.41369e-19	6.98673e-17	0.00243956	0.00056055	chr17	72919704	72920187	chr17_72919704_72920187	484	3	3.75051e-12	0.000701176	0.000442484	0.000341723	0.0010281	0.000843379
SNORA69	SNORA69	chr17	75955658	75956447	chr17_75955658_75956447	790	5	1.9665e-54	3.68433e-05	8.41369e-19	6.98673e-17	0.00243956	0.00056055	chr17	77783551	77784110	chr17_77783551_77784110	560	3	5.98571e-13	0.000300909	3.20555e-05	6.23801e-06	0.000667662	0.000328229
snoU13, Y_RNA, SCARNA16, U1, SCARNA18, SCARNA24, SNORD112, SNORA62, SNORA63, SNORD46, SNORA2, SNORD81, U3, SNORA51, SNORA25, SCARNA20, SNORA67, U6, SNORA70, SNORA77, SNORA26, U8, SCARNA11, SNORA31, SNORA42, SNORA40, SNORD64, ACA64, snoU109, SNORD60, SNORD116	snoU13	chr1	47972688	47974278	chr1_47972688_47974278	1591	10	1.14483e-22	3.86929e-05	8.77348e-11	1.12624e-12	0.00151842	0.000232925	chr1	47910239	47910456	chr1_47910239_47910456	218	2	8.11997e-12	0.00471268	0.0303093	0.0083994	0.00128211	0.00109306
SNORD65	SNORD65	chr4	140163119	140163240	chr4_140163119_140163240	122	3	7.168e-14	3.97755e-05	2.69207e-09	2.11285e-08	0.00129373	0.000573868	chr4	147557774	147558544	chr4_147557774_147558544	771	5	7.67906e-30	3.06944e-07	3.8564e-08	1.42195e-12	0.00301389	0.00222257
SNORD65	SNORD65	chr4	140163119	140163240	chr4_140163119_140163240	122	3	7.168e-14	3.97755e-05	2.69207e-09	2.11285e-08	0.00129373	0.000573868	chr4	174443366	174443865	chr4_174443366_174443865	500	4	2.23518e-12	0.000740629	0.030307	0.00204937	0.00148324	0.00120957
SNORA69	SNORA69	chr17	79320473	79320652	chr17_79320473_79320652	180	2	3.92256e-21	4.20755e-05	2.4876e-11	2.83154e-10	0.00121047	0.000596502	chr17	35060451	35060679	chr17_35060451_35060679	229	3	8.90824e-13	1.33307e-05	1.28514e-05	4.089e-06	0.00216258	0.00141697
SNORA69	SNORA69	chr17	79320473	79320652	chr17_79320473_79320652	180	2	3.92256e-21	4.20755e-05	2.4876e-11	2.83154e-10	0.00121047	0.000596502	chr17	72919704	72920187	chr17_72919704_72920187	484	3	3.75051e-12	0.000701176	0.000442484	0.000341723	0.0010281	0.000843379
SNORA69	SNORA69	chr17	79320473	79320652	chr17_79320473_79320652	180	2	3.92256e-21	4.20755e-05	2.4876e-11	2.83154e-10	0.00121047	0.000596502	chr17	77783551	77784110	chr17_77783551_77784110	560	3	5.98571e-13	0.000300909	3.20555e-05	6.23801e-06	0.000667662	0.000328229
SNORA38, SNORA8, VGLL2, SNORD28, SNORA20	SNORA38	chr6	117586817	117587588	chr6_117586817_117587588	772	4	1.47189e-33	4.48958e-05	6.93738e-12	8.31737e-11	0.00109712	0.000298171	chr6	117586225	117587155	chr6_117586225_117587155	931	9	6.83464e-15	0.00221559	0.013459	0.000618607	0.00127605	0.000438045
SNORA69	SNORA69	chr17	81033740	81034137	chr17_81033740_81034137	398	3	2.54152e-07	4.49126e-05	0.00106353	5.31404e-05	0.000613868	0.000478592	chr17	35060451	35060679	chr17_35060451_35060679	229	3	8.90824e-13	1.33307e-05	1.28514e-05	4.089e-06	0.00216258	0.00141697
SNORA69	SNORA69	chr17	81033740	81034137	chr17_81033740_81034137	398	3	2.54152e-07	4.49126e-05	0.00106353	5.31404e-05	0.000613868	0.000478592	chr17	72919704	72920187	chr17_72919704_72920187	484	3	3.75051e-12	0.000701176	0.000442484	0.000341723	0.0010281	0.000843379
SNORA69	SNORA69	chr17	81033740	81034137	chr17_81033740_81034137	398	3	2.54152e-07	4.49126e-05	0.00106353	5.31404e-05	0.000613868	0.000478592	chr17	77783551	77784110	chr17_77783551_77784110	560	3	5.98571e-13	0.000300909	3.20555e-05	6.23801e-06	0.000667662	0.000328229
ZNF800	ZNF800	chr7	126987682	126988262	chr7_126987682_126988262	581	5	4.06804e-08	4.55562e-05	0.000809951	1.37427e-05	0.000690606	-1.4572e-05	chr7	126987682	126988120	chr7_126987682_126988120	439	3	2.2322e-12	6.53414e-05	0.00128533	3.67125e-05	0.0012722	0.000814408
SNORA69	SNORA69	chr17	47979069	47979730	chr17_47979069_47979730	662	3	1.71764e-13	4.65023e-05	1.39263e-07	5.04371e-07	0.00178763	0.000745819	chr17	35060451	35060679	chr17_35060451_35060679	229	3	8.90824e-13	1.33307e-05	1.28514e-05	4.089e-06	0.00216258	0.00141697
SNORA69	SNORA69	chr17	47979069	47979730	chr17_47979069_47979730	662	3	1.71764e-13	4.65023e-05	1.39263e-07	5.04371e-07	0.00178763	0.000745819	chr17	72919704	72920187	chr17_72919704_72920187	484	3	3.75051e-12	0.000701176	0.000442484	0.000341723	0.0010281	0.000843379
SNORA69	SNORA69	chr17	47979069	47979730	chr17_47979069_47979730	662	3	1.71764e-13	4.65023e-05	1.39263e-07	5.04371e-07	0.00178763	0.000745819	chr17	77783551	77784110	chr17_77783551_77784110	560	3	5.98571e-13	0.000300909	3.20555e-05	6.23801e-06	0.000667662	0.000328229
SNORA69	SNORA69	chr17	17184692	17185060	chr17_17184692_17185060	369	5	1.15829e-09	5.3747e-05	0.000111085	1.00702e-06	-0.000731382	-7.84544e-05	chr17	35060451	35060679	chr17_35060451_35060679	229	3	8.90824e-13	1.33307e-05	1.28514e-05	4.089e-06	0.00216258	0.00141697
SNORA69	SNORA69	chr17	17184692	17185060	chr17_17184692_17185060	369	5	1.15829e-09	5.3747e-05	0.000111085	1.00702e-06	-0.000731382	-7.84544e-05	chr17	72919704	72920187	chr17_72919704_72920187	484	3	3.75051e-12	0.000701176	0.000442484	0.000341723	0.0010281	0.000843379
SNORA69	SNORA69	chr17	17184692	17185060	chr17_17184692_17185060	369	5	1.15829e-09	5.3747e-05	0.000111085	1.00702e-06	-0.000731382	-7.84544e-05	chr17	77783551	77784110	chr17_77783551_77784110	560	3	5.98571e-13	0.000300909	3.20555e-05	6.23801e-06	0.000667662	0.000328229
SRRM3	SRRM3	chr7	75913933	75914313	chr7_75913933_75914313	381	2	5.95937e-08	5.6566e-05	0.000118933	4.35161e-05	-0.00109817	-0.000784499	chr7	75889229	75889293	chr7_75889229_75889293	65	2	1.34624e-11	0.000125798	0.00236812	0.000232809	0.00182653	0.0012732
SNORA69	SNORA69	chr17	8264387	8264525	chr17_8264387_8264525	139	2	7.65472e-07	5.86677e-05	0.00022824	5.94734e-05	-0.000856705	-0.00076928	chr17	35060451	35060679	chr17_35060451_35060679	229	3	8.90824e-13	1.33307e-05	1.28514e-05	4.089e-06	0.00216258	0.00141697
SNORA69	SNORA69	chr17	8264387	8264525	chr17_8264387_8264525	139	2	7.65472e-07	5.86677e-05	0.00022824	5.94734e-05	-0.000856705	-0.00076928	chr17	72919704	72920187	chr17_72919704_72920187	484	3	3.75051e-12	0.000701176	0.000442484	0.000341723	0.0010281	0.000843379
SNORA69	SNORA69	chr17	8264387	8264525	chr17_8264387_8264525	139	2	7.65472e-07	5.86677e-05	0.00022824	5.94734e-05	-0.000856705	-0.00076928	chr17	77783551	77784110	chr17_77783551_77784110	560	3	5.98571e-13	0.000300909	3.20555e-05	6.23801e-06	0.000667662	0.000328229
SNORA69	SNORA69	chr17	47987056	47988100	chr17_47987056_47988100	1045	3	3.04966e-07	5.94582e-05	0.00016212	8.13997e-06	0.000878638	0.000360324	chr17	35060451	35060679	chr17_35060451_35060679	229	3	8.90824e-13	1.33307e-05	1.28514e-05	4.089e-06	0.00216258	0.00141697
SNORA69	SNORA69	chr17	47987056	47988100	chr17_47987056_47988100	1045	3	3.04966e-07	5.94582e-05	0.00016212	8.13997e-06	0.000878638	0.000360324	chr17	72919704	72920187	chr17_72919704_72920187	484	3	3.75051e-12	0.000701176	0.000442484	0.000341723	0.0010281	0.000843379
SNORA69	SNORA69	chr17	47987056	47988100	chr17_47987056_47988100	1045	3	3.04966e-07	5.94582e-05	0.00016212	8.13997e-06	0.000878638	0.000360324	chr17	77783551	77784110	chr17_77783551_77784110	560	3	5.98571e-13	0.000300909	3.20555e-05	6.23801e-06	0.000667662	0.000328229
LSP1	LSP1	chr11	4389856	4390263	chr11_4389856_4390263	408	4	5.59046e-11	6.1097e-05	0.000118335	5.38694e-07	-0.00128347	-0.000787765	chr11	20184487	20184718	chr11_20184487_20184718	232	3	8.37117e-12	0.0104245	0.0318836	0.0116752	0.00147183	0.00102292
SNORA11, PITX2, SNORD65	SNORA11	chr4	111549880	111552353	chr4_111549880_111552353	2474	14	1.41867e-29	6.18137e-05	1.14537e-11	3.73301e-15	0.00054647	9.16511e-05	chr4	111543401	111544463	chr4_111543401_111544463	1063	9	7.52494e-14	0.000648606	0.050717	0.00187374	0.00209458	0.000813929
RP11-738B7.1	RP11	chr7	129424539	129425731	chr7_129424539_129425731	1193	7	1.22084e-16	6.59709e-05	4.00919e-07	2.1794e-08	0.00097882	0.000229483	chr7	129422915	129423354	chr7_129422915_129423354	440	4	1.18767e-14	3.07494e-05	0.000858821	1.5179e-05	0.00171401	0.00117917
SNORD36, IRS2	SNORD36	chr13	110433636	110434682	chr13_110433636_110434682	1047	5	4.30816e-17	6.914e-05	8.54141e-08	2.05989e-09	-0.00197179	-0.0008698	chr13	110438256	110439234	chr13_110438256_110439234	979	10	3.1314e-16	0.00027152	0.0333572	0.000967487	0.00244189	0.000825794
SNORA69	SNORA69	chr17	47929214	47929557	chr17_47929214_47929557	344	3	2.15688e-11	7.01262e-05	8.09037e-07	1.18611e-06	0.00107299	0.000377156	chr17	35060451	35060679	chr17_35060451_35060679	229	3	8.90824e-13	1.33307e-05	1.28514e-05	4.089e-06	0.00216258	0.00141697
SNORA69	SNORA69	chr17	47929214	47929557	chr17_47929214_47929557	344	3	2.15688e-11	7.01262e-05	8.09037e-07	1.18611e-06	0.00107299	0.000377156	chr17	72919704	72920187	chr17_72919704_72920187	484	3	3.75051e-12	0.000701176	0.000442484	0.000341723	0.0010281	0.000843379
SNORA69	SNORA69	chr17	47929214	47929557	chr17_47929214_47929557	344	3	2.15688e-11	7.01262e-05	8.09037e-07	1.18611e-06	0.00107299	0.000377156	chr17	77783551	77784110	chr17_77783551_77784110	560	3	5.98571e-13	0.000300909	3.20555e-05	6.23801e-06	0.000667662	0.000328229
SNORD36	SNORD36	chr13	114742928	114743606	chr13_114742928_114743606	679	2	1.74045e-14	7.1323e-05	5.50947e-08	2.7401e-07	0.00121279	0.000700191	chr13	112720927	112721425	chr13_112720927_112721425	499	3	5.77784e-13	0.0251202	0.0449875	0.0329645	0.00142367	0.00101572
SNORD36	SNORD36	chr13	112632730	112633175	chr13_112632730_112633175	446	2	1.04161e-18	7.2968e-05	1.15552e-10	1.22661e-09	-0.00384596	-0.00187748	chr13	112720927	112721425	chr13_112720927_112721425	499	3	5.77784e-13	0.0251202	0.0449875	0.0329645	0.00142367	0.00101572
LSP1	LSP1	chr11	1884988	1885097	chr11_1884988_1885097	110	2	8.43031e-11	7.52787e-05	6.8131e-08	3.30448e-07	-0.00142128	-0.000793892	chr11	20184487	20184718	chr11_20184487_20184718	232	3	8.37117e-12	0.0104245	0.0318836	0.0116752	0.00147183	0.00102292
snoU13, Y_RNA, SCARNA16, U1, SNORD112, SNORA63, SNORD46, SNORA2, SNORD81, U3, SNORA51, SNORA25, SNORA58, CKS1B, SCARNA20, SNORA67, U6, SNORA70, SNORA77, SNORA26, U8, SCARNA11, SNORA31, SNORA42, SNORA40, SNORD64, ACA64, SNORD78, snoU109, SNORD60, SNORD116	snoU13	chr1	85359106	85359334	chr1_85359106_85359334	229	4	7.93226e-07	7.55567e-05	0.00319693	6.08897e-05	0.000598822	0.000185655	chr1	91172288	91172337	chr1_91172288_91172337	50	2	1.87497e-12	0.0188194	0.00699173	0.0107396	0.00161514	0.000882884
snoU13, Y_RNA, SCARNA16, U1, SNORD112, SNORA63, SNORD46, SNORA2, SNORD81, U3, SNORA51, SNORA25, SNORA58, CKS1B, SCARNA20, SNORA67, U6, SNORA70, SNORA77, SNORA26, U8, SCARNA11, SNORA31, SNORA42, SNORA40, SNORD64, ACA64, SNORD78, snoU109, SNORD60, SNORD116	snoU13	chr1	85359106	85359334	chr1_85359106_85359334	229	4	7.93226e-07	7.55567e-05	0.00319693	6.08897e-05	0.000598822	0.000185655	chr1	91190366	91190891	chr1_91190366_91190891	526	5	1.48921e-12	0.00879172	0.0648127	0.0203167	0.002145	0.00146291
LSP1	LSP1	chr11	2314836	2315339	chr11_2314836_2315339	504	3	1.49817e-08	8.00533e-05	2.83717e-05	5.57035e-06	0.00101623	0.000606959	chr11	20184487	20184718	chr11_20184487_20184718	232	3	8.37117e-12	0.0104245	0.0318836	0.0116752	0.00147183	0.00102292
SNORA69	SNORA69	chr17	81021419	81021770	chr17_81021419_81021770	352	5	1.08234e-08	8.0455e-05	0.000895289	8.00721e-06	0.000745735	0.000380031	chr17	35060451	35060679	chr17_35060451_35060679	229	3	8.90824e-13	1.33307e-05	1.28514e-05	4.089e-06	0.00216258	0.00141697
SNORA69	SNORA69	chr17	81021419	81021770	chr17_81021419_81021770	352	5	1.08234e-08	8.0455e-05	0.000895289	8.00721e-06	0.000745735	0.000380031	chr17	72919704	72920187	chr17_72919704_72920187	484	3	3.75051e-12	0.000701176	0.000442484	0.000341723	0.0010281	0.000843379
SNORA69	SNORA69	chr17	81021419	81021770	chr17_81021419_81021770	352	5	1.08234e-08	8.0455e-05	0.000895289	8.00721e-06	0.000745735	0.000380031	chr17	77783551	77784110	chr17_77783551_77784110	560	3	5.98571e-13	0.000300909	3.20555e-05	6.23801e-06	0.000667662	0.000328229
SNORA3, ZNF518B	SNORA3	chr4	10458165	10458918	chr4_10458165_10458918	754	5	1.27427e-43	8.93913e-05	3.94087e-15	1.74738e-12	0.00150227	0.000333252	chr4	10458165	10460009	chr4_10458165_10460009	1845	17	4.36569e-50	3.48586e-11	2.11796e-05	9.71034e-17	0.00433425	0.00166577
SNORD36	SNORD36	chr13	114911566	114912946	chr13_114911566_114912946	1381	7	6.01503e-23	9.40376e-05	1.84233e-09	2.59818e-09	0.0020522	0.000409848	chr13	112720927	112721425	chr13_112720927_112721425	499	3	5.77784e-13	0.0251202	0.0449875	0.0329645	0.00142367	0.00101572
SNORD36	SNORD36	chr13	114908876	114909333	chr13_114908876_114909333	458	2	5.43766e-10	9.44377e-05	1.14309e-06	3.19035e-06	0.00107384	0.000719104	chr13	112720927	112721425	chr13_112720927_112721425	499	3	5.77784e-13	0.0251202	0.0449875	0.0329645	0.00142367	0.00101572
SNORD65	SNORD65	chr4	157893231	157893541	chr4_157893231_157893541	311	2	1.67539e-28	9.67799e-05	1.97464e-12	2.72215e-11	-0.000782782	-0.000390294	chr4	147557774	147558544	chr4_147557774_147558544	771	5	7.67906e-30	3.06944e-07	3.8564e-08	1.42195e-12	0.00301389	0.00222257
SNORD65	SNORD65	chr4	157893231	157893541	chr4_157893231_157893541	311	2	1.67539e-28	9.67799e-05	1.97464e-12	2.72215e-11	-0.000782782	-0.000390294	chr4	174443366	174443865	chr4_174443366_174443865	500	4	2.23518e-12	0.000740629	0.030307	0.00204937	0.00148324	0.00120957
SNORA69, KCNJ12	SNORA69	chr17	21280288	21281507	chr17_21280288_21281507	1220	10	3.41727e-30	9.78255e-05	2.35223e-10	4.62812e-12	0.00117105	0.000243682	chr17	21280740	21281163	chr17_21280740_21281163	424	4	5.0299e-12	0.00308651	0.0629943	0.00990071	0.00152253	0.0012583
SYT7, SNORD43	SYT7	chr11	61314117	61314936	chr11_61314117_61314936	820	4	1.10142e-10	9.83023e-05	0.000166748	2.02458e-07	0.00163732	0.000111933	chr11	61334859	61335600	chr11_61334859_61335600	742	6	3.89592e-14	0.000433297	0.00294757	5.56565e-05	0.00222118	0.00118648
SNORA69	SNORA69	chr17	78964771	78964779	chr17_78964771_78964779	9	2	1.16082e-08	0.000105835	2.53071e-05	2.72679e-05	-0.00130084	-0.00084731	chr17	35060451	35060679	chr17_35060451_35060679	229	3	8.90824e-13	1.33307e-05	1.28514e-05	4.089e-06	0.00216258	0.00141697
SNORA69	SNORA69	chr17	78964771	78964779	chr17_78964771_78964779	9	2	1.16082e-08	0.000105835	2.53071e-05	2.72679e-05	-0.00130084	-0.00084731	chr17	72919704	72920187	chr17_72919704_72920187	484	3	3.75051e-12	0.000701176	0.000442484	0.000341723	0.0010281	0.000843379
SNORA69	SNORA69	chr17	78964771	78964779	chr17_78964771_78964779	9	2	1.16082e-08	0.000105835	2.53071e-05	2.72679e-05	-0.00130084	-0.00084731	chr17	77783551	77784110	chr17_77783551_77784110	560	3	5.98571e-13	0.000300909	3.20555e-05	6.23801e-06	0.000667662	0.000328229
SNORA69	SNORA69	chr17	79361553	79361742	chr17_79361553_79361742	190	4	2.96026e-08	0.00011187	6.92146e-05	3.07773e-05	0.00105786	0.000342289	chr17	35060451	35060679	chr17_35060451_35060679	229	3	8.90824e-13	1.33307e-05	1.28514e-05	4.089e-06	0.00216258	0.00141697
SNORA69	SNORA69	chr17	79361553	79361742	chr17_79361553_79361742	190	4	2.96026e-08	0.00011187	6.92146e-05	3.07773e-05	0.00105786	0.000342289	chr17	72919704	72920187	chr17_72919704_72920187	484	3	3.75051e-12	0.000701176	0.000442484	0.000341723	0.0010281	0.000843379
SNORA69	SNORA69	chr17	79361553	79361742	chr17_79361553_79361742	190	4	2.96026e-08	0.00011187	6.92146e-05	3.07773e-05	0.00105786	0.000342289	chr17	77783551	77784110	chr17_77783551_77784110	560	3	5.98571e-13	0.000300909	3.20555e-05	6.23801e-06	0.000667662	0.000328229
SNORA69	SNORA69	chr17	28803808	28803927	chr17_28803808_28803927	120	2	1.87474e-10	0.000113836	6.77283e-07	2.29444e-06	-0.00147587	-0.000532858	chr17	35060451	35060679	chr17_35060451_35060679	229	3	8.90824e-13	1.33307e-05	1.28514e-05	4.089e-06	0.00216258	0.00141697
SNORA69	SNORA69	chr17	28803808	28803927	chr17_28803808_28803927	120	2	1.87474e-10	0.000113836	6.77283e-07	2.29444e-06	-0.00147587	-0.000532858	chr17	72919704	72920187	chr17_72919704_72920187	484	3	3.75051e-12	0.000701176	0.000442484	0.000341723	0.0010281	0.000843379
SNORA69	SNORA69	chr17	28803808	28803927	chr17_28803808_28803927	120	2	1.87474e-10	0.000113836	6.77283e-07	2.29444e-06	-0.00147587	-0.000532858	chr17	77783551	77784110	chr17_77783551_77784110	560	3	5.98571e-13	0.000300909	3.20555e-05	6.23801e-06	0.000667662	0.000328229
SNORA38, SNORA8, SNORD28, SNORA20	SNORA38	chr6	88879038	88879765	chr6_88879038_88879765	728	3	1.14603e-15	0.000125605	1.09942e-08	3.00773e-08	-0.00142662	-0.00063398	chr6	100050506	100051841	chr6_100050506_100051841	1336	11	1.76331e-19	0.00013563	0.0231118	4.12642e-05	0.00113676	0.000571765
SNORA38, SNORA8, SNORD28, SNORA20	SNORA38	chr6	88879038	88879765	chr6_88879038_88879765	728	3	1.14603e-15	0.000125605	1.09942e-08	3.00773e-08	-0.00142662	-0.00063398	chr6	100912906	100913592	chr6_100912906_100913592	687	6	1.80809e-27	4.28586e-09	3.88355e-06	9.55214e-10	0.00153584	0.00100345
SNORA38, SNORA8, SNORD28, SNORA20	SNORA38	chr6	88879038	88879765	chr6_88879038_88879765	728	3	1.14603e-15	0.000125605	1.09942e-08	3.00773e-08	-0.00142662	-0.00063398	chr6	105388668	105389599	chr6_105388668_105389599	932	6	5.95507e-16	1.21248e-07	0.000447273	1.48279e-07	0.00466408	0.00225804
SNORD36, SOX1	SNORD36	chr13	112722719	112724583	chr13_112722719_112724583	1865	11	5.39959e-23	0.000130736	3.52403e-09	4.42389e-11	0.00039566	0.000128702	chr13	112722719	112723581	chr13_112722719_112723581	863	6	2.62235e-15	0.000126521	0.031724	0.000650313	0.00294806	0.00179499
SNORA38, SNORA8, OSTM1-AS1, SNORD28, OSTM1, SNORA20	SNORA38	chr6	108478494	108479584	chr6_108478494_108479584	1091	10	4.82807e-16	0.000135748	3.12167e-06	1.25387e-08	0.000226759	9.0559e-05	chr6	108478650	108479584	chr6_108478650_108479584	935	9	4.42584e-23	4.24102e-06	1.55689e-05	1.58511e-08	0.00237863	0.000887685
snoU13, Y_RNA, SCARNA16, U1, SCARNA18, SCARNA24, SNORD112, SNORA62, SNORA63, SNORD46, SNORA2, SNORD81, U3, SNORA51, SNORA25, SCARNA20, SNORA67, U6, SNORA70, SNORA77, SNORA26, U8, SCARNA11, SNORA31, SNORA42, SNORA40, SNORD64, ACA64, snoU109, SNORD60, SNORD116	snoU13	chr1	53067365	53067965	chr1_53067365_53067965	601	6	1.15412e-14	0.000138845	1.58964e-05	1.68547e-07	0.000868306	8.52232e-06	chr1	47910239	47910456	chr1_47910239_47910456	218	2	8.11997e-12	0.00471268	0.0303093	0.0083994	0.00128211	0.00109306
SNORA69	SNORA69	chr17	30333737	30333964	chr17_30333737_30333964	228	2	9.75198e-08	0.000149339	3.82146e-05	4.17652e-05	-0.0009439	-0.000698072	chr17	35060451	35060679	chr17_35060451_35060679	229	3	8.90824e-13	1.33307e-05	1.28514e-05	4.089e-06	0.00216258	0.00141697
SNORA69	SNORA69	chr17	30333737	30333964	chr17_30333737_30333964	228	2	9.75198e-08	0.000149339	3.82146e-05	4.17652e-05	-0.0009439	-0.000698072	chr17	72919704	72920187	chr17_72919704_72920187	484	3	3.75051e-12	0.000701176	0.000442484	0.000341723	0.0010281	0.000843379
SNORA69	SNORA69	chr17	30333737	30333964	chr17_30333737_30333964	228	2	9.75198e-08	0.000149339	3.82146e-05	4.17652e-05	-0.0009439	-0.000698072	chr17	77783551	77784110	chr17_77783551_77784110	560	3	5.98571e-13	0.000300909	3.20555e-05	6.23801e-06	0.000667662	0.000328229
LSP1	LSP1	chr11	2207455	2207660	chr11_2207455_2207660	206	2	2.11853e-08	0.000149801	4.28826e-06	9.89904e-06	-0.00152071	-0.000897908	chr11	20184487	20184718	chr11_20184487_20184718	232	3	8.37117e-12	0.0104245	0.0318836	0.0116752	0.00147183	0.00102292
SNORA69	SNORA69	chr17	77815166	77816711	chr17_77815166_77816711	1546	5	7.40109e-40	0.000154517	1.87384e-16	1.87615e-13	0.000872962	0.000187695	chr17	35060451	35060679	chr17_35060451_35060679	229	3	8.90824e-13	1.33307e-05	1.28514e-05	4.089e-06	0.00216258	0.00141697
SNORA69	SNORA69	chr17	77815166	77816711	chr17_77815166_77816711	1546	5	7.40109e-40	0.000154517	1.87384e-16	1.87615e-13	0.000872962	0.000187695	chr17	72919704	72920187	chr17_72919704_72920187	484	3	3.75051e-12	0.000701176	0.000442484	0.000341723	0.0010281	0.000843379
SNORA69	SNORA69	chr17	77815166	77816711	chr17_77815166_77816711	1546	5	7.40109e-40	0.000154517	1.87384e-16	1.87615e-13	0.000872962	0.000187695	chr17	77783551	77784110	chr17_77783551_77784110	560	3	5.98571e-13	0.000300909	3.20555e-05	6.23801e-06	0.000667662	0.000328229
SNORD74, SNORD50, SNORA11, snoU2_19, SNORD65	SNORD74	chr4	100576887	100576985	chr4_100576887_100576985	99	2	1.87138e-09	0.000162114	3.89556e-07	1.65678e-06	-0.00131366	-0.000664277	chr4	94749496	94749609	chr4_94749496_94749609	114	3	8.01431e-12	0.035886	0.0646947	0.0447508	0.000860844	0.000806866
snoU13, Y_RNA, SCARNA16, SCARNA21, U1, SCARNA17, SCARNA18, SNORD112, SNORA62, SNORA63, SNORD46, SNORA2, SNORD81, U3, SNORA51, SCARNA20, SNORA67, U6, SNORA70, SNORA77, SNORA26, U8, SCARNA11, SNORA31, SNORA42, SNORA40, SNORD64, ACA64, snoU109, SNORD60	snoU13	chr1	27693398	27694390	chr1_27693398_27694390	993	7	1.52419e-13	0.000164176	1.01044e-05	7.87157e-07	0.000873602	0.000199632	chr1	26735245	26736154	chr1_26735245_26736154	910	10	1.46723e-20	3.52016e-05	0.0165931	1.96531e-05	0.00195578	0.000790606
SNORA81, SNORD66, SNORD2, SNORA18, U4	SNORA81	chr3	169385983	169386507	chr3_169385983_169386507	525	5	7.42971e-18	0.000179032	3.90073e-09	5.38691e-08	0.000338543	9.85301e-05	chr3	157812226	157812763	chr3_157812226_157812763	538	3	4.13276e-17	2.23573e-05	0.00040082	3.12761e-05	0.00209096	0.00163643
snoU13, Y_RNA, SCARNA16, SCARNA21, U1, SCARNA17, SCARNA18, SNORD112, SNORA62, SNORA63, SNORD46, SNORA2, SNORD81, U3, SNORA51, SCARNA20, SNORA67, U6, SNORA70, SNORA77, SNORA26, U8, SCARNA11, SNORA31, SNORA42, SNORA40, SNORD64, ACA64, snoU109, SNORD60	snoU13	chr1	26855423	26855926	chr1_26855423_26855926	504	4	9.13377e-11	0.000190983	8.2252e-05	1.25134e-06	-0.00100243	-0.000491956	chr1	26735245	26736154	chr1_26735245_26736154	910	10	1.46723e-20	3.52016e-05	0.0165931	1.96531e-05	0.00195578	0.000790606
SNORA38, SNORA8, SNORD28, SNORA20	SNORA38	chr6	106957081	106958303	chr6_106957081_106958303	1223	5	1.05257e-71	0.00019144	3.61209e-19	7.86176e-19	0.00321628	0.000927834	chr6	100050506	100051841	chr6_100050506_100051841	1336	11	1.76331e-19	0.00013563	0.0231118	4.12642e-05	0.00113676	0.000571765
SNORA38, SNORA8, SNORD28, SNORA20	SNORA38	chr6	106957081	106958303	chr6_106957081_106958303	1223	5	1.05257e-71	0.00019144	3.61209e-19	7.86176e-19	0.00321628	0.000927834	chr6	100912906	100913592	chr6_100912906_100913592	687	6	1.80809e-27	4.28586e-09	3.88355e-06	9.55214e-10	0.00153584	0.00100345
SNORA38, SNORA8, SNORD28, SNORA20	SNORA38	chr6	106957081	106958303	chr6_106957081_106958303	1223	5	1.05257e-71	0.00019144	3.61209e-19	7.86176e-19	0.00321628	0.000927834	chr6	105388668	105389599	chr6_105388668_105389599	932	6	5.95507e-16	1.21248e-07	0.000447273	1.48279e-07	0.00466408	0.00225804
SNORA38, SNORA8, SNORD28, SNORA20	SNORA38	chr6	85478207	85478807	chr6_85478207_85478807	601	4	2.81753e-13	0.000199629	7.70502e-06	1.65161e-07	0.000280222	0.000140299	chr6	100050506	100051841	chr6_100050506_100051841	1336	11	1.76331e-19	0.00013563	0.0231118	4.12642e-05	0.00113676	0.000571765
SNORA38, SNORA8, SNORD28, SNORA20	SNORA38	chr6	85478207	85478807	chr6_85478207_85478807	601	4	2.81753e-13	0.000199629	7.70502e-06	1.65161e-07	0.000280222	0.000140299	chr6	100912906	100913592	chr6_100912906_100913592	687	6	1.80809e-27	4.28586e-09	3.88355e-06	9.55214e-10	0.00153584	0.00100345
SNORA38, SNORA8, SNORD28, SNORA20	SNORA38	chr6	85478207	85478807	chr6_85478207_85478807	601	4	2.81753e-13	0.000199629	7.70502e-06	1.65161e-07	0.000280222	0.000140299	chr6	105388668	105389599	chr6_105388668_105389599	932	6	5.95507e-16	1.21248e-07	0.000447273	1.48279e-07	0.00466408	0.00225804
SNORA69	SNORA69	chr17	80292079	80292252	chr17_80292079_80292252	174	3	8.70588e-07	0.000219189	0.000837235	7.09874e-05	0.00146597	0.000959055	chr17	35060451	35060679	chr17_35060451_35060679	229	3	8.90824e-13	1.33307e-05	1.28514e-05	4.089e-06	0.00216258	0.00141697
SNORA69	SNORA69	chr17	80292079	80292252	chr17_80292079_80292252	174	3	8.70588e-07	0.000219189	0.000837235	7.09874e-05	0.00146597	0.000959055	chr17	72919704	72920187	chr17_72919704_72920187	484	3	3.75051e-12	0.000701176	0.000442484	0.000341723	0.0010281	0.000843379
SNORA69	SNORA69	chr17	80292079	80292252	chr17_80292079_80292252	174	3	8.70588e-07	0.000219189	0.000837235	7.09874e-05	0.00146597	0.000959055	chr17	77783551	77784110	chr17_77783551_77784110	560	3	5.98571e-13	0.000300909	3.20555e-05	6.23801e-06	0.000667662	0.000328229
LSP1	LSP1	chr11	2029309	2029688	chr11_2029309_2029688	380	4	5.25784e-08	0.000228563	0.00022899	1.67003e-05	0.000691092	0.000242494	chr11	20184487	20184718	chr11_20184487_20184718	232	3	8.37117e-12	0.0104245	0.0318836	0.0116752	0.00147183	0.00102292
TMEM179	TMEM179	chr14	105031052	105031193	chr14_105031052_105031193	142	2	8.85197e-08	0.00024407	2.9278e-05	4.50302e-05	-0.000681196	-0.000524883	chr14	105070749	105071382	chr14_105070749_105071382	634	5	1.10371e-13	0.00105085	0.000502992	8.25608e-05	0.00158742	0.00111654
SNORA69	SNORA69	chr17	59520986	59521422	chr17_59520986_59521422	437	5	6.94776e-11	0.000272885	1.33955e-06	1.36868e-06	0.00133171	0.000639988	chr17	35060451	35060679	chr17_35060451_35060679	229	3	8.90824e-13	1.33307e-05	1.28514e-05	4.089e-06	0.00216258	0.00141697
SNORA69	SNORA69	chr17	59520986	59521422	chr17_59520986_59521422	437	5	6.94776e-11	0.000272885	1.33955e-06	1.36868e-06	0.00133171	0.000639988	chr17	72919704	72920187	chr17_72919704_72920187	484	3	3.75051e-12	0.000701176	0.000442484	0.000341723	0.0010281	0.000843379
SNORA69	SNORA69	chr17	59520986	59521422	chr17_59520986_59521422	437	5	6.94776e-11	0.000272885	1.33955e-06	1.36868e-06	0.00133171	0.000639988	chr17	77783551	77784110	chr17_77783551_77784110	560	3	5.98571e-13	0.000300909	3.20555e-05	6.23801e-06	0.000667662	0.000328229
SNORD65	SNORD65	chr4	155547491	155547539	chr4_155547491_155547539	49	2	7.93016e-07	0.00027621	0.000110725	0.000108156	0.000948802	0.000705113	chr4	147557774	147558544	chr4_147557774_147558544	771	5	7.67906e-30	3.06944e-07	3.8564e-08	1.42195e-12	0.00301389	0.00222257
SNORD65	SNORD65	chr4	155547491	155547539	chr4_155547491_155547539	49	2	7.93016e-07	0.00027621	0.000110725	0.000108156	0.000948802	0.000705113	chr4	174443366	174443865	chr4_174443366_174443865	500	4	2.23518e-12	0.000740629	0.030307	0.00204937	0.00148324	0.00120957
SNORA69	SNORA69	chr17	62658371	62658919	chr17_62658371_62658919	549	4	9.68734e-11	0.000289099	1.56302e-05	1.38702e-06	0.000418275	0.000183584	chr17	35060451	35060679	chr17_35060451_35060679	229	3	8.90824e-13	1.33307e-05	1.28514e-05	4.089e-06	0.00216258	0.00141697
SNORA69	SNORA69	chr17	62658371	62658919	chr17_62658371_62658919	549	4	9.68734e-11	0.000289099	1.56302e-05	1.38702e-06	0.000418275	0.000183584	chr17	72919704	72920187	chr17_72919704_72920187	484	3	3.75051e-12	0.000701176	0.000442484	0.000341723	0.0010281	0.000843379
SNORA69	SNORA69	chr17	62658371	62658919	chr17_62658371_62658919	549	4	9.68734e-11	0.000289099	1.56302e-05	1.38702e-06	0.000418275	0.000183584	chr17	77783551	77784110	chr17_77783551_77784110	560	3	5.98571e-13	0.000300909	3.20555e-05	6.23801e-06	0.000667662	0.000328229
RP11-175E9.1, SNORA7	RP11	chr8	23571706	23572595	chr8_23571706_23572595	890	9	7.99259e-27	0.000297714	1.60479e-11	4.00096e-12	0.00148344	0.000239968	chr8	23564156	23564717	chr8_23564156_23564717	562	5	1.84e-12	0.00455837	0.0688721	0.014739	0.00153059	0.000790967
SNORA38, SNORA8, SNORD28, SNORA20	SNORA38	chr6	99273157	99273830	chr6_99273157_99273830	674	9	6.61787e-11	0.000317628	0.0006018	1.14077e-05	0.000293	0.000107618	chr6	100050506	100051841	chr6_100050506_100051841	1336	11	1.76331e-19	0.00013563	0.0231118	4.12642e-05	0.00113676	0.000571765
SNORA38, SNORA8, SNORD28, SNORA20	SNORA38	chr6	99273157	99273830	chr6_99273157_99273830	674	9	6.61787e-11	0.000317628	0.0006018	1.14077e-05	0.000293	0.000107618	chr6	100912906	100913592	chr6_100912906_100913592	687	6	1.80809e-27	4.28586e-09	3.88355e-06	9.55214e-10	0.00153584	0.00100345
SNORA38, SNORA8, SNORD28, SNORA20	SNORA38	chr6	99273157	99273830	chr6_99273157_99273830	674	9	6.61787e-11	0.000317628	0.0006018	1.14077e-05	0.000293	0.000107618	chr6	105388668	105389599	chr6_105388668_105389599	932	6	5.95507e-16	1.21248e-07	0.000447273	1.48279e-07	0.00466408	0.00225804
CTD-2330J20.2, ALDH1A2	CTD	chr15	58357204	58358811	chr15_58357204_58358811	1608	10	1.12955e-22	0.000333791	7.39827e-09	1.25015e-12	0.000635445	0.000155483	chr15	58357319	58357989	chr15_58357319_58357989	671	7	3.58358e-19	2.96409e-07	0.00320047	1.4485e-06	0.0012513	0.000788957
SNORD65	SNORD65	chr4	154604770	154605262	chr4_154604770_154605262	493	3	2.19622e-12	0.000351547	1.28623e-07	9.82108e-07	0.00157062	0.000549433	chr4	147557774	147558544	chr4_147557774_147558544	771	5	7.67906e-30	3.06944e-07	3.8564e-08	1.42195e-12	0.00301389	0.00222257
SNORD65	SNORD65	chr4	154604770	154605262	chr4_154604770_154605262	493	3	2.19622e-12	0.000351547	1.28623e-07	9.82108e-07	0.00157062	0.000549433	chr4	174443366	174443865	chr4_174443366_174443865	500	4	2.23518e-12	0.000740629	0.030307	0.00204937	0.00148324	0.00120957
PRMT8	PRMT8	chr12	3565676	3566133	chr12_3565676_3566133	458	6	2.94578e-20	0.000357914	2.15172e-09	1.9957e-09	0.000644432	0.000273697	chr12	3600764	3601514	chr12_3600764_3601514	751	3	2.87129e-24	7.60668e-05	1.09701e-05	4.65647e-08	0.00190514	0.000924128
SNORD36, HS6ST3	SNORD36	chr13	96743492	96744289	chr13_96743492_96744289	798	5	9.9532e-26	0.000360186	3.80361e-12	3.18617e-10	0.00155373	0.000348643	chr13	96742905	96743754	chr13_96742905_96743754	850	6	4.13142e-15	0.00143832	0.0103026	0.000258782	0.00161607	0.000652586
CTD-3032H12.2, SNORD111, CTD-3032H12.1, SNORD33	CTD	chr16	54971007	54973966	chr16_54971007_54973966	2960	17	6.31835e-14	0.000361565	0.000104271	4.52305e-09	0.000709596	0.00019215	chr16	54972078	54972647	chr16_54972078_54972647	570	5	4.16018e-13	0.0232324	0.0894509	0.0434543	0.00125482	0.00100238
SNORD65	SNORD65	chr4	148652434	148652849	chr4_148652434_148652849	416	3	3.38175e-18	0.000383823	4.4172e-10	1.57294e-08	0.00175524	0.000573117	chr4	147557774	147558544	chr4_147557774_147558544	771	5	7.67906e-30	3.06944e-07	3.8564e-08	1.42195e-12	0.00301389	0.00222257
SNORD65	SNORD65	chr4	148652434	148652849	chr4_148652434_148652849	416	3	3.38175e-18	0.000383823	4.4172e-10	1.57294e-08	0.00175524	0.000573117	chr4	174443366	174443865	chr4_174443366_174443865	500	4	2.23518e-12	0.000740629	0.030307	0.00204937	0.00148324	0.00120957
SNORA7, SNORA32, PRDM14	SNORA7	chr8	70981068	70984917	chr8_70981068_70984917	3850	20	2.07067e-14	0.000390051	1.05404e-05	4.98654e-13	-0.00150799	0.000104482	chr8	70983348	70984270	chr8_70983348_70984270	923	9	5.2162e-19	0.000589981	4.36177e-05	5.62674e-05	0.00228638	0.000940435
SNORA38, SNORA8, SNORD28, SNORA20	SNORA38	chr6	106583161	106583179	chr6_106583161_106583179	19	2	1.712e-07	0.000427306	1.6706e-05	3.91793e-05	0.00147739	0.000988219	chr6	100050506	100051841	chr6_100050506_100051841	1336	11	1.76331e-19	0.00013563	0.0231118	4.12642e-05	0.00113676	0.000571765
SNORA38, SNORA8, SNORD28, SNORA20	SNORA38	chr6	106583161	106583179	chr6_106583161_106583179	19	2	1.712e-07	0.000427306	1.6706e-05	3.91793e-05	0.00147739	0.000988219	chr6	100912906	100913592	chr6_100912906_100913592	687	6	1.80809e-27	4.28586e-09	3.88355e-06	9.55214e-10	0.00153584	0.00100345
SNORA38, SNORA8, SNORD28, SNORA20	SNORA38	chr6	106583161	106583179	chr6_106583161_106583179	19	2	1.712e-07	0.000427306	1.6706e-05	3.91793e-05	0.00147739	0.000988219	chr6	105388668	105389599	chr6_105388668_105389599	932	6	5.95507e-16	1.21248e-07	0.000447273	1.48279e-07	0.00466408	0.00225804
LSP1	LSP1	chr11	1873757	1874320	chr11_1873757_1874320	564	5	4.21793e-19	0.000467183	3.72753e-10	1.65606e-08	0.00155124	0.000367254	chr11	20184487	20184718	chr11_20184487_20184718	232	3	8.37117e-12	0.0104245	0.0318836	0.0116752	0.00147183	0.00102292
SNORD23, DSC3	SNORD23	chr18	28620915	28622200	chr18_28620915_28622200	1286	6	4.50953e-19	0.000483542	3.4373e-09	2.52098e-07	0.000780581	0.000184519	chr18	28622200	28622593	chr18_28622200_28622593	394	3	1.60445e-12	0.0366814	0.10934	0.0626763	0.00216326	0.00124557
SNORA11, PITX2, SNORD65	SNORA11	chr4	111545062	111545628	chr4_111545062_111545628	567	3	2.67206e-11	0.000512175	4.51977e-06	4.33703e-06	0.000884917	0.000484491	chr4	111543401	111544463	chr4_111543401_111544463	1063	9	7.52494e-14	0.000648606	0.050717	0.00187374	0.00209458	0.000813929
5S_rRNA, SNORA4, SNORD11, SNORD51, SNORA41, SCARNA6, SNORD39, SNORA75, ACA59, SNORA48, LY75, LY75-CD302, SNORA43, SNORA1, Vault	5S_rRNA	chr2	160760732	160761622	chr2_160760732_160761622	891	10	1.29989e-17	0.000514116	8.18126e-05	1.91318e-09	0.00128648	0.000475915	chr2	160760732	160761622	chr2_160760732_160761622	891	10	1.16553e-16	0.00835685	0.00415717	0.000223596	0.00179602	0.00107198
SNORA69	SNORA69	chr17	79829883	79830196	chr17_79829883_79830196	314	4	1.11507e-12	0.000514194	3.28539e-07	1.06953e-06	-0.00142376	-0.000475603	chr17	35060451	35060679	chr17_35060451_35060679	229	3	8.90824e-13	1.33307e-05	1.28514e-05	4.089e-06	0.00216258	0.00141697
SNORA69	SNORA69	chr17	79829883	79830196	chr17_79829883_79830196	314	4	1.11507e-12	0.000514194	3.28539e-07	1.06953e-06	-0.00142376	-0.000475603	chr17	72919704	72920187	chr17_72919704_72920187	484	3	3.75051e-12	0.000701176	0.000442484	0.000341723	0.0010281	0.000843379
SNORA69	SNORA69	chr17	79829883	79830196	chr17_79829883_79830196	314	4	1.11507e-12	0.000514194	3.28539e-07	1.06953e-06	-0.00142376	-0.000475603	chr17	77783551	77784110	chr17_77783551_77784110	560	3	5.98571e-13	0.000300909	3.20555e-05	6.23801e-06	0.000667662	0.000328229
SNORD36	SNORD36	chr13	100085073	100085455	chr13_100085073_100085455	383	4	1.78976e-11	0.000532541	2.23418e-06	2.6687e-07	0.00194564	0.000184849	chr13	112720927	112721425	chr13_112720927_112721425	499	3	5.77784e-13	0.0251202	0.0449875	0.0329645	0.00142367	0.00101572
CNTNAP2	CNTNAP2	chr7	147591462	147591961	chr7_147591462_147591961	500	4	3.67649e-19	0.000554586	1.43023e-09	1.00408e-10	0.00187377	4.81505e-05	chr7	145812842	145813494	chr7_145812842_145813494	653	11	1.543e-13	0.0314965	0.0227145	0.00864489	0.00206549	0.000807871
SNORD36	SNORD36	chr13	112555823	112555987	chr13_112555823_112555987	165	3	6.92322e-14	0.000578929	7.45821e-09	8.68881e-08	-0.00162713	-0.00067474	chr13	112720927	112721425	chr13_112720927_112721425	499	3	5.77784e-13	0.0251202	0.0449875	0.0329645	0.00142367	0.00101572
SNORA69	SNORA69	chr17	79269488	79269886	chr17_79269488_79269886	399	3	3.6368e-11	0.00063514	4.35888e-05	8.48795e-07	-0.00128247	-0.000848861	chr17	35060451	35060679	chr17_35060451_35060679	229	3	8.90824e-13	1.33307e-05	1.28514e-05	4.089e-06	0.00216258	0.00141697
SNORA69	SNORA69	chr17	79269488	79269886	chr17_79269488_79269886	399	3	3.6368e-11	0.00063514	4.35888e-05	8.48795e-07	-0.00128247	-0.000848861	chr17	72919704	72920187	chr17_72919704_72920187	484	3	3.75051e-12	0.000701176	0.000442484	0.000341723	0.0010281	0.000843379
SNORA69	SNORA69	chr17	79269488	79269886	chr17_79269488_79269886	399	3	3.6368e-11	0.00063514	4.35888e-05	8.48795e-07	-0.00128247	-0.000848861	chr17	77783551	77784110	chr17_77783551_77784110	560	3	5.98571e-13	0.000300909	3.20555e-05	6.23801e-06	0.000667662	0.000328229
SNORA69	SNORA69	chr17	25680519	25680787	chr17_25680519_25680787	269	3	6.48658e-08	0.000636976	1.86396e-05	3.97657e-05	-0.00111456	-0.000430727	chr17	35060451	35060679	chr17_35060451_35060679	229	3	8.90824e-13	1.33307e-05	1.28514e-05	4.089e-06	0.00216258	0.00141697
SNORA69	SNORA69	chr17	25680519	25680787	chr17_25680519_25680787	269	3	6.48658e-08	0.000636976	1.86396e-05	3.97657e-05	-0.00111456	-0.000430727	chr17	72919704	72920187	chr17_72919704_72920187	484	3	3.75051e-12	0.000701176	0.000442484	0.000341723	0.0010281	0.000843379
SNORA69	SNORA69	chr17	25680519	25680787	chr17_25680519_25680787	269	3	6.48658e-08	0.000636976	1.86396e-05	3.97657e-05	-0.00111456	-0.000430727	chr17	77783551	77784110	chr17_77783551_77784110	560	3	5.98571e-13	0.000300909	3.20555e-05	6.23801e-06	0.000667662	0.000328229
SNORD36	SNORD36	chr13	97762132	97762345	chr13_97762132_97762345	214	2	1.59555e-07	0.000644555	8.87549e-06	2.85989e-05	-0.000161288	-8.91807e-05	chr13	112720927	112721425	chr13_112720927_112721425	499	3	5.77784e-13	0.0251202	0.0449875	0.0329645	0.00142367	0.00101572
SNORA69	SNORA69	chr17	26577563	26577877	chr17_26577563_26577877	315	5	4.80458e-09	0.000723053	9.37996e-05	1.29746e-05	-0.00098951	-0.000396452	chr17	35060451	35060679	chr17_35060451_35060679	229	3	8.90824e-13	1.33307e-05	1.28514e-05	4.089e-06	0.00216258	0.00141697
SNORA69	SNORA69	chr17	26577563	26577877	chr17_26577563_26577877	315	5	4.80458e-09	0.000723053	9.37996e-05	1.29746e-05	-0.00098951	-0.000396452	chr17	72919704	72920187	chr17_72919704_72920187	484	3	3.75051e-12	0.000701176	0.000442484	0.000341723	0.0010281	0.000843379
SNORA69	SNORA69	chr17	26577563	26577877	chr17_26577563_26577877	315	5	4.80458e-09	0.000723053	9.37996e-05	1.29746e-05	-0.00098951	-0.000396452	chr17	77783551	77784110	chr17_77783551_77784110	560	3	5.98571e-13	0.000300909	3.20555e-05	6.23801e-06	0.000667662	0.000328229
SNORA38, SNORA8, SNORD28, SNORA20	SNORA38	chr6	91007563	91007625	chr6_91007563_91007625	63	2	1.83035e-07	0.000730481	5.66034e-05	0.000113494	-0.0012429	-0.000403739	chr6	100050506	100051841	chr6_100050506_100051841	1336	11	1.76331e-19	0.00013563	0.0231118	4.12642e-05	0.00113676	0.000571765
SNORA38, SNORA8, SNORD28, SNORA20	SNORA38	chr6	91007563	91007625	chr6_91007563_91007625	63	2	1.83035e-07	0.000730481	5.66034e-05	0.000113494	-0.0012429	-0.000403739	chr6	100912906	100913592	chr6_100912906_100913592	687	6	1.80809e-27	4.28586e-09	3.88355e-06	9.55214e-10	0.00153584	0.00100345
SNORA38, SNORA8, SNORD28, SNORA20	SNORA38	chr6	91007563	91007625	chr6_91007563_91007625	63	2	1.83035e-07	0.000730481	5.66034e-05	0.000113494	-0.0012429	-0.000403739	chr6	105388668	105389599	chr6_105388668_105389599	932	6	5.95507e-16	1.21248e-07	0.000447273	1.48279e-07	0.00466408	0.00225804
SNORA69	SNORA69	chr17	42835688	42836175	chr17_42835688_42836175	488	4	2.04496e-14	0.000799633	3.00481e-08	9.73075e-07	0.000905625	0.000268256	chr17	35060451	35060679	chr17_35060451_35060679	229	3	8.90824e-13	1.33307e-05	1.28514e-05	4.089e-06	0.00216258	0.00141697
SNORA69	SNORA69	chr17	42835688	42836175	chr17_42835688_42836175	488	4	2.04496e-14	0.000799633	3.00481e-08	9.73075e-07	0.000905625	0.000268256	chr17	72919704	72920187	chr17_72919704_72920187	484	3	3.75051e-12	0.000701176	0.000442484	0.000341723	0.0010281	0.000843379
SNORA69	SNORA69	chr17	42835688	42836175	chr17_42835688_42836175	488	4	2.04496e-14	0.000799633	3.00481e-08	9.73075e-07	0.000905625	0.000268256	chr17	77783551	77784110	chr17_77783551_77784110	560	3	5.98571e-13	0.000300909	3.20555e-05	6.23801e-06	0.000667662	0.000328229
SNORD36	SNORD36	chr13	112575212	112575735	chr13_112575212_112575735	524	3	6.9734e-11	0.000815165	8.6452e-05	1.06618e-06	-0.000913855	-0.000592787	chr13	112720927	112721425	chr13_112720927_112721425	499	3	5.77784e-13	0.0251202	0.0449875	0.0329645	0.00142367	0.00101572
SNORD74, SLC10A4, SNORA3, snoR442, SNORA11, SNORD42, snoU2_19, SNORD65	SNORD74	chr4	48486087	48486785	chr4_48486087_48486785	699	4	2.03552e-16	0.000824247	2.03076e-08	1.87538e-07	0.00159918	0.000380953	chr4	48484788	48486472	chr4_48484788_48486472	1685	14	3.35137e-20	7.7029e-06	0.0213071	1.29393e-05	0.00358594	0.00104138
SKOR1	SKOR1	chr15	68120393	68120412	chr15_68120393_68120412	20	2	9.38588e-07	0.000963458	0.000257806	0.000341885	0.000270441	0.000184378	chr15	68120757	68121563	chr15_68120757_68121563	807	4	2.50384e-12	0.000653965	0.0146673	0.00106891	0.00199723	0.00122923
SNORA69	SNORA69	chr17	75502873	75503069	chr17_75502873_75503069	197	3	1.24897e-07	0.000969471	3.2448e-05	3.26652e-05	0.000540186	0.000328566	chr17	35060451	35060679	chr17_35060451_35060679	229	3	8.90824e-13	1.33307e-05	1.28514e-05	4.089e-06	0.00216258	0.00141697
SNORA69	SNORA69	chr17	75502873	75503069	chr17_75502873_75503069	197	3	1.24897e-07	0.000969471	3.2448e-05	3.26652e-05	0.000540186	0.000328566	chr17	72919704	72920187	chr17_72919704_72920187	484	3	3.75051e-12	0.000701176	0.000442484	0.000341723	0.0010281	0.000843379
SNORA69	SNORA69	chr17	75502873	75503069	chr17_75502873_75503069	197	3	1.24897e-07	0.000969471	3.2448e-05	3.26652e-05	0.000540186	0.000328566	chr17	77783551	77784110	chr17_77783551_77784110	560	3	5.98571e-13	0.000300909	3.20555e-05	6.23801e-06	0.000667662	0.000328229
SNORA69	SNORA69	chr17	42402401	42403152	chr17_42402401_42403152	752	5	1.06313e-28	0.000999135	2.03224e-12	6.37737e-10	0.00131963	0.000281189	chr17	35060451	35060679	chr17_35060451_35060679	229	3	8.90824e-13	1.33307e-05	1.28514e-05	4.089e-06	0.00216258	0.00141697
SNORA69	SNORA69	chr17	42402401	42403152	chr17_42402401_42403152	752	5	1.06313e-28	0.000999135	2.03224e-12	6.37737e-10	0.00131963	0.000281189	chr17	72919704	72920187	chr17_72919704_72920187	484	3	3.75051e-12	0.000701176	0.000442484	0.000341723	0.0010281	0.000843379
SNORA69	SNORA69	chr17	42402401	42403152	chr17_42402401_42403152	752	5	1.06313e-28	0.000999135	2.03224e-12	6.37737e-10	0.00131963	0.000281189	chr17	77783551	77784110	chr17_77783551_77784110	560	3	5.98571e-13	0.000300909	3.20555e-05	6.23801e-06	0.000667662	0.000328229
RP11-382A20.4, BNC1	RP11	chr15	83951663	83952420	chr15_83951663_83952420	758	5	1.03754e-09	0.00104508	0.000996835	4.73524e-05	0.000314834	0.000178457	chr15	83952420	83954395	chr15_83952420_83954395	1976	25	2.49348e-21	0.00892861	0.0100357	0.0011851	0.00194714	0.000739103
SNORA69	SNORA69	chr17	46534400	46534794	chr17_46534400_46534794	395	4	3.24079e-14	0.00112284	5.47415e-08	1.31298e-07	0.00127392	0.000284886	chr17	35060451	35060679	chr17_35060451_35060679	229	3	8.90824e-13	1.33307e-05	1.28514e-05	4.089e-06	0.00216258	0.00141697
SNORA69	SNORA69	chr17	46534400	46534794	chr17_46534400_46534794	395	4	3.24079e-14	0.00112284	5.47415e-08	1.31298e-07	0.00127392	0.000284886	chr17	72919704	72920187	chr17_72919704_72920187	484	3	3.75051e-12	0.000701176	0.000442484	0.000341723	0.0010281	0.000843379
SNORA69	SNORA69	chr17	46534400	46534794	chr17_46534400_46534794	395	4	3.24079e-14	0.00112284	5.47415e-08	1.31298e-07	0.00127392	0.000284886	chr17	77783551	77784110	chr17_77783551_77784110	560	3	5.98571e-13	0.000300909	3.20555e-05	6.23801e-06	0.000667662	0.000328229
SNORD36	SNORD36	chr13	103244746	103245138	chr13_103244746_103245138	393	2	3.05654e-15	0.00121671	5.94225e-09	5.7634e-08	-0.00148191	-0.000741432	chr13	112720927	112721425	chr13_112720927_112721425	499	3	5.77784e-13	0.0251202	0.0449875	0.0329645	0.00142367	0.00101572
LSP1	LSP1	chr11	5265008	5265215	chr11_5265008_5265215	208	3	3.12246e-07	0.00121742	4.4957e-05	8.51726e-05	-0.001174	-0.000654787	chr11	20184487	20184718	chr11_20184487_20184718	232	3	8.37117e-12	0.0104245	0.0318836	0.0116752	0.00147183	0.00102292
SNORD74, SNORD50, SNORA11, NKX6-1, snoU2_19, SNORD65	SNORD74	chr4	85414016	85414486	chr4_85414016_85414486	471	5	1.34303e-09	0.00125371	8.53785e-07	1.67692e-05	0.00244026	0.000853807	chr4	85418265	85420311	chr4_85418265_85420311	2047	13	8.3917e-30	1.02393e-06	2.64278e-05	6.60796e-10	0.00228368	0.0006695
PRMT8	PRMT8	chr12	3598335	3598853	chr12_3598335_3598853	519	2	8.28569e-12	0.00126947	2.56556e-07	1.77799e-06	-0.00132063	-0.000602711	chr12	3600764	3601514	chr12_3600764_3601514	751	3	2.87129e-24	7.60668e-05	1.09701e-05	4.65647e-08	0.00190514	0.000924128
SPAG6	SPAG6	chr10	22634432	22635028	chr10_22634432_22635028	597	6	9.52832e-39	0.0013481	1.00407e-13	4.69215e-11	0.000563679	0.000130115	chr10	22633916	22635028	chr10_22633916_22635028	1113	14	1.02225e-29	6.00569e-08	0.0109691	8.69279e-08	0.00269596	0.00133368
SNORA69	SNORA69	chr17	21367200	21368039	chr17_21367200_21368039	840	4	1.88943e-31	0.00136454	1.94116e-12	1.03908e-10	0.0019122	0.000633911	chr17	35060451	35060679	chr17_35060451_35060679	229	3	8.90824e-13	1.33307e-05	1.28514e-05	4.089e-06	0.00216258	0.00141697
SNORA69	SNORA69	chr17	21367200	21368039	chr17_21367200_21368039	840	4	1.88943e-31	0.00136454	1.94116e-12	1.03908e-10	0.0019122	0.000633911	chr17	72919704	72920187	chr17_72919704_72920187	484	3	3.75051e-12	0.000701176	0.000442484	0.000341723	0.0010281	0.000843379
SNORA69	SNORA69	chr17	21367200	21368039	chr17_21367200_21368039	840	4	1.88943e-31	0.00136454	1.94116e-12	1.03908e-10	0.0019122	0.000633911	chr17	77783551	77784110	chr17_77783551_77784110	560	3	5.98571e-13	0.000300909	3.20555e-05	6.23801e-06	0.000667662	0.000328229
SNORA69	SNORA69	chr17	40250199	40250727	chr17_40250199_40250727	529	5	1.64887e-53	0.00136877	4.45262e-19	9.8777e-16	0.00239073	0.000568386	chr17	35060451	35060679	chr17_35060451_35060679	229	3	8.90824e-13	1.33307e-05	1.28514e-05	4.089e-06	0.00216258	0.00141697
SNORA69	SNORA69	chr17	40250199	40250727	chr17_40250199_40250727	529	5	1.64887e-53	0.00136877	4.45262e-19	9.8777e-16	0.00239073	0.000568386	chr17	72919704	72920187	chr17_72919704_72920187	484	3	3.75051e-12	0.000701176	0.000442484	0.000341723	0.0010281	0.000843379
SNORA69	SNORA69	chr17	40250199	40250727	chr17_40250199_40250727	529	5	1.64887e-53	0.00136877	4.45262e-19	9.8777e-16	0.00239073	0.000568386	chr17	77783551	77784110	chr17_77783551_77784110	560	3	5.98571e-13	0.000300909	3.20555e-05	6.23801e-06	0.000667662	0.000328229
SNORD36, SNORD37	SNORD36	chr13	44715436	44715948	chr13_44715436_44715948	513	2	1.79902e-17	0.00158893	5.74767e-09	5.66073e-08	-0.00156925	-0.000784268	chr13	53424812	53425257	chr13_53424812_53425257	446	2	8.48653e-13	0.00135367	0.00579132	0.00193353	0.000819326	0.00074089
snoU13, Y_RNA, SCARNA16, U1, SNORD112, SNORA63, SNORD46, SNORA2, SNORD81, U3, SNORA51, SNORA25, SNORA58, CKS1B, SCARNA20, SNORA67, U6, SNORA70, SNORA77, SNORA26, U8, SCARNA11, SNORA31, SNORA42, SNORA40, SNORD64, ACA64, SNORD78, snoU109, SNORD60, SNORD116	snoU13	chr1	87793364	87793510	chr1_87793364_87793510	147	3	6.64706e-12	0.00165777	4.15102e-06	1.08346e-06	-0.00163617	-0.000817189	chr1	91172288	91172337	chr1_91172288_91172337	50	2	1.87497e-12	0.0188194	0.00699173	0.0107396	0.00161514	0.000882884
snoU13, Y_RNA, SCARNA16, U1, SNORD112, SNORA63, SNORD46, SNORA2, SNORD81, U3, SNORA51, SNORA25, SNORA58, CKS1B, SCARNA20, SNORA67, U6, SNORA70, SNORA77, SNORA26, U8, SCARNA11, SNORA31, SNORA42, SNORA40, SNORD64, ACA64, SNORD78, snoU109, SNORD60, SNORD116	snoU13	chr1	87793364	87793510	chr1_87793364_87793510	147	3	6.64706e-12	0.00165777	4.15102e-06	1.08346e-06	-0.00163617	-0.000817189	chr1	91190366	91190891	chr1_91190366_91190891	526	5	1.48921e-12	0.00879172	0.0648127	0.0203167	0.002145	0.00146291
LSP1	LSP1	chr11	19366443	19366793	chr11_19366443_19366793	351	3	7.77135e-11	0.00173692	1.07311e-06	9.9733e-06	-0.00142152	-0.000486258	chr11	20184487	20184718	chr11_20184487_20184718	232	3	8.37117e-12	0.0104245	0.0318836	0.0116752	0.00147183	0.00102292
snoU13, Y_RNA, SCARNA16, U1, SNORD112, SNORA63, SNORD46, SNORA2, SNORD81, U3, SNORA51, SNORA25, SNORA58, CKS1B, SCARNA20, SNORA67, U6, SNORA70, SNORA77, SNORA26, SNORA72, U8, SCARNA11, SNORA31, SNORA42, NHLH2, SNORA40, SNORD64, ACA64, SNORD78, snoU109, SNORD60, SNORD116	snoU13	chr1	116380316	116381082	chr1_116380316_116381082	767	7	2.14731e-19	0.00177769	2.73787e-10	9.2197e-08	0.00114687	0.000204127	chr1	116380946	116381475	chr1_116380946_116381475	530	5	1.87432e-14	0.000635008	0.0212139	0.00205023	0.00145738	0.000831992
SNORD36, SNORD37	SNORD36	chr13	49792685	49793170	chr13_49792685_49793170	486	5	2.20411e-10	0.00189277	2.60088e-06	1.24072e-05	0.00118312	0.000256286	chr13	53424812	53425257	chr13_53424812_53425257	446	2	8.48653e-13	0.00135367	0.00579132	0.00193353	0.000819326	0.00074089
LSP1	LSP1	chr11	6219573	6220344	chr11_6219573_6220344	772	4	3.19909e-20	0.00197349	9.17332e-11	7.75263e-09	-0.00209726	-0.000450949	chr11	20184487	20184718	chr11_20184487_20184718	232	3	8.37117e-12	0.0104245	0.0318836	0.0116752	0.00147183	0.00102292
SNORA38, SNORA8, SNORD28, SNORA20	SNORA38	chr6	96462814	96463246	chr6_96462814_96463246	433	3	6.30138e-23	0.00200639	2.75285e-11	1.95481e-09	0.00136757	0.000472894	chr6	100050506	100051841	chr6_100050506_100051841	1336	11	1.76331e-19	0.00013563	0.0231118	4.12642e-05	0.00113676	0.000571765
SNORA38, SNORA8, SNORD28, SNORA20	SNORA38	chr6	96462814	96463246	chr6_96462814_96463246	433	3	6.30138e-23	0.00200639	2.75285e-11	1.95481e-09	0.00136757	0.000472894	chr6	100912906	100913592	chr6_100912906_100913592	687	6	1.80809e-27	4.28586e-09	3.88355e-06	9.55214e-10	0.00153584	0.00100345
SNORA38, SNORA8, SNORD28, SNORA20	SNORA38	chr6	96462814	96463246	chr6_96462814_96463246	433	3	6.30138e-23	0.00200639	2.75285e-11	1.95481e-09	0.00136757	0.000472894	chr6	105388668	105389599	chr6_105388668_105389599	932	6	5.95507e-16	1.21248e-07	0.000447273	1.48279e-07	0.00466408	0.00225804
SNORD36, GPC5	SNORD36	chr13	92051576	92051786	chr13_92051576_92051786	211	3	5.22095e-09	0.00256524	3.32617e-06	3.15088e-05	0.00132448	0.000514159	chr13	92050675	92051705	chr13_92050675_92051705	1031	14	1.54048e-39	0.000329882	1.01207e-07	5.03016e-14	0.00221344	0.000510995
SNORD74, SNORD50, SNORA11, snoU2_19, SNORD65	SNORD74	chr4	88928251	88928541	chr4_88928251_88928541	291	5	2.09452e-10	0.00262564	9.28569e-07	1.24973e-05	0.00197658	0.000430111	chr4	94749496	94749609	chr4_94749496_94749609	114	3	8.01431e-12	0.035886	0.0646947	0.0447508	0.000860844	0.000806866
MME, SNORA81, SNORD66, SNORD2, Metazoa_SRP, SNORA18, U4	MME	chr3	154796701	154797399	chr3_154796701_154797399	699	5	8.19185e-14	0.00268209	1.89146e-06	1.38813e-06	0.000296073	0.000170385	chr3	154797349	154797677	chr3_154797349_154797677	329	7	3.60254e-12	0.0233788	0.0349409	0.0252461	0.00132947	0.00026187
snoU13, Y_RNA, SCARNA16, SCARNA21, U1, SCARNA17, SCARNA18, SNORD112, SNORA62, SNORA63, SNORD46, SNORA2, SNORD81, U3, SNORA51, SCARNA20, SNORA67, U6, SNORA70, SNORA77, SNORA26, U8, SCARNA11, SNORA31, SNORA42, SNORA40, SNORD64, ACA64, snoU109, SNORD60	snoU13	chr1	25942460	25942827	chr1_25942460_25942827	368	3	7.3232e-09	0.00268962	0.000208555	0.000504353	0.000233117	7.89865e-05	chr1	26735245	26736154	chr1_26735245_26736154	910	10	1.46723e-20	3.52016e-05	0.0165931	1.96531e-05	0.00195578	0.000790606
SNORA69	SNORA69	chr17	80336304	80336356	chr17_80336304_80336356	53	2	2.6549e-07	0.00271064	8.56623e-06	4.1002e-05	-0.00109433	-0.000547539	chr17	35060451	35060679	chr17_35060451_35060679	229	3	8.90824e-13	1.33307e-05	1.28514e-05	4.089e-06	0.00216258	0.00141697
SNORA69	SNORA69	chr17	80336304	80336356	chr17_80336304_80336356	53	2	2.6549e-07	0.00271064	8.56623e-06	4.1002e-05	-0.00109433	-0.000547539	chr17	72919704	72920187	chr17_72919704_72920187	484	3	3.75051e-12	0.000701176	0.000442484	0.000341723	0.0010281	0.000843379
SNORA69	SNORA69	chr17	80336304	80336356	chr17_80336304_80336356	53	2	2.6549e-07	0.00271064	8.56623e-06	4.1002e-05	-0.00109433	-0.000547539	chr17	77783551	77784110	chr17_77783551_77784110	560	3	5.98571e-13	0.000300909	3.20555e-05	6.23801e-06	0.000667662	0.000328229
SNORA38, SNORA8, SNORD28, SNORA20	SNORA38	chr6	99295470	99295790	chr6_99295470_99295790	321	3	3.91855e-09	0.00276537	3.7134e-06	2.22218e-05	0.00110848	0.000379905	chr6	100050506	100051841	chr6_100050506_100051841	1336	11	1.76331e-19	0.00013563	0.0231118	4.12642e-05	0.00113676	0.000571765
SNORA38, SNORA8, SNORD28, SNORA20	SNORA38	chr6	99295470	99295790	chr6_99295470_99295790	321	3	3.91855e-09	0.00276537	3.7134e-06	2.22218e-05	0.00110848	0.000379905	chr6	100912906	100913592	chr6_100912906_100913592	687	6	1.80809e-27	4.28586e-09	3.88355e-06	9.55214e-10	0.00153584	0.00100345
SNORA38, SNORA8, SNORD28, SNORA20	SNORA38	chr6	99295470	99295790	chr6_99295470_99295790	321	3	3.91855e-09	0.00276537	3.7134e-06	2.22218e-05	0.00110848	0.000379905	chr6	105388668	105389599	chr6_105388668_105389599	932	6	5.95507e-16	1.21248e-07	0.000447273	1.48279e-07	0.00466408	0.00225804
LSP1	LSP1	chr11	8228022	8228508	chr11_8228022_8228508	487	3	2.13287e-09	0.00316178	1.15016e-05	5.43359e-06	-0.00325831	-0.00158426	chr11	20184487	20184718	chr11_20184487_20184718	232	3	8.37117e-12	0.0104245	0.0318836	0.0116752	0.00147183	0.00102292
SNORA69	SNORA69	chr17	61524073	61524304	chr17_61524073_61524304	232	3	1.81045e-09	0.00316274	6.21167e-05	1.0761e-05	0.00133309	0.00048134	chr17	35060451	35060679	chr17_35060451_35060679	229	3	8.90824e-13	1.33307e-05	1.28514e-05	4.089e-06	0.00216258	0.00141697
SNORA69	SNORA69	chr17	61524073	61524304	chr17_61524073_61524304	232	3	1.81045e-09	0.00316274	6.21167e-05	1.0761e-05	0.00133309	0.00048134	chr17	72919704	72920187	chr17_72919704_72920187	484	3	3.75051e-12	0.000701176	0.000442484	0.000341723	0.0010281	0.000843379
SNORA69	SNORA69	chr17	61524073	61524304	chr17_61524073_61524304	232	3	1.81045e-09	0.00316274	6.21167e-05	1.0761e-05	0.00133309	0.00048134	chr17	77783551	77784110	chr17_77783551_77784110	560	3	5.98571e-13	0.000300909	3.20555e-05	6.23801e-06	0.000667662	0.000328229
ISL1, snoZ6, SNORA27, SNORA68, RPS23P5, SNORA57, CTD-2314G24.2, SNORA76, 7SK, SNORD45	ISL1	chr5	50677808	50679817	chr5_50677808_50679817	2010	18	1.3153e-16	0.00332398	1.83155e-07	2.31414e-10	0.000333273	7.27993e-05	chr5	50678451	50679743	chr5_50678451_50679743	1293	16	8.98731e-22	4.4471e-05	0.0987431	0.000528715	0.00239486	0.00107717
GPR37	GPR37	chr7	124404244	124404822	chr7_124404244_124404822	579	5	1.29073e-12	0.00350801	2.75282e-07	1.91316e-06	0.00173631	0.000549477	chr7	124405137	124406235	chr7_124405137_124406235	1099	9	2.49465e-26	1.31661e-06	0.000617292	2.08756e-08	0.00142212	0.000548571
SNORD36	SNORD36	chr13	113260640	113261142	chr13_113260640_113261142	503	5	5.84891e-28	0.0041975	3.12646e-13	2.15577e-10	-0.00232377	-0.000508201	chr13	112720927	112721425	chr13_112720927_112721425	499	3	5.77784e-13	0.0251202	0.0449875	0.0329645	0.00142367	0.00101572
snoU13, Y_RNA, SCARNA16, U1, SNORD112, SNORA63, SNORD46, SNORA2, SNORD81, U3, SNORA51, SNORA25, SNORA58, CKS1B, SCARNA20, SNORA67, U6, SNORA70, SNORA77, SNORA26, U8, SCARNA11, SNORA31, SNORA42, SNORA40, SNORD64, ACA64, SNORD78, snoU109, SNORD60, SNORD116	snoU13	chr1	88927170	88928839	chr1_88927170_88928839	1670	7	2.75748e-32	0.0042244	5.81956e-15	1.10344e-17	-0.00185388	-5.71083e-05	chr1	91172288	91172337	chr1_91172288_91172337	50	2	1.87497e-12	0.0188194	0.00699173	0.0107396	0.00161514	0.000882884
snoU13, Y_RNA, SCARNA16, U1, SNORD112, SNORA63, SNORD46, SNORA2, SNORD81, U3, SNORA51, SNORA25, SNORA58, CKS1B, SCARNA20, SNORA67, U6, SNORA70, SNORA77, SNORA26, U8, SCARNA11, SNORA31, SNORA42, SNORA40, SNORD64, ACA64, SNORD78, snoU109, SNORD60, SNORD116	snoU13	chr1	88927170	88928839	chr1_88927170_88928839	1670	7	2.75748e-32	0.0042244	5.81956e-15	1.10344e-17	-0.00185388	-5.71083e-05	chr1	91190366	91190891	chr1_91190366_91190891	526	5	1.48921e-12	0.00879172	0.0648127	0.0203167	0.002145	0.00146291
SNORD36	SNORD36	chr13	110768493	110768683	chr13_110768493_110768683	191	3	4.67726e-08	0.00456685	3.73328e-06	2.51072e-05	0.00175017	0.000407993	chr13	112720927	112721425	chr13_112720927_112721425	499	3	5.77784e-13	0.0251202	0.0449875	0.0329645	0.00142367	0.00101572
SNORA69	SNORA69	chr17	27507501	27508027	chr17_27507501_27508027	527	10	3.48673e-12	0.00457585	4.02635e-05	1.47532e-05	-0.00144881	-0.000109218	chr17	35060451	35060679	chr17_35060451_35060679	229	3	8.90824e-13	1.33307e-05	1.28514e-05	4.089e-06	0.00216258	0.00141697
SNORA69	SNORA69	chr17	27507501	27508027	chr17_27507501_27508027	527	10	3.48673e-12	0.00457585	4.02635e-05	1.47532e-05	-0.00144881	-0.000109218	chr17	72919704	72920187	chr17_72919704_72920187	484	3	3.75051e-12	0.000701176	0.000442484	0.000341723	0.0010281	0.000843379
SNORA69	SNORA69	chr17	27507501	27508027	chr17_27507501_27508027	527	10	3.48673e-12	0.00457585	4.02635e-05	1.47532e-05	-0.00144881	-0.000109218	chr17	77783551	77784110	chr17_77783551_77784110	560	3	5.98571e-13	0.000300909	3.20555e-05	6.23801e-06	0.000667662	0.000328229
NHLRC1, SNORA20	NHLRC1	chr6	18122474	18123224	chr6_18122474_18123224	751	12	1.89121e-11	0.00499388	0.00019998	5.57076e-06	-0.000988949	-0.000243327	chr6	18122474	18122719	chr6_18122474_18122719	246	2	4.95237e-15	2.01878e-06	4.75087e-06	1.08681e-06	0.00248238	0.00213603
SNORA69	SNORA69	chr17	38374778	38375257	chr17_38374778_38375257	480	4	1.84175e-11	0.00548343	8.15229e-05	2.28381e-06	0.00137349	0.000386111	chr17	35060451	35060679	chr17_35060451_35060679	229	3	8.90824e-13	1.33307e-05	1.28514e-05	4.089e-06	0.00216258	0.00141697
SNORA69	SNORA69	chr17	38374778	38375257	chr17_38374778_38375257	480	4	1.84175e-11	0.00548343	8.15229e-05	2.28381e-06	0.00137349	0.000386111	chr17	72919704	72920187	chr17_72919704_72920187	484	3	3.75051e-12	0.000701176	0.000442484	0.000341723	0.0010281	0.000843379
SNORA69	SNORA69	chr17	38374778	38375257	chr17_38374778_38375257	480	4	1.84175e-11	0.00548343	8.15229e-05	2.28381e-06	0.00137349	0.000386111	chr17	77783551	77784110	chr17_77783551_77784110	560	3	5.98571e-13	0.000300909	3.20555e-05	6.23801e-06	0.000667662	0.000328229
SNORA69	SNORA69	chr17	15846926	15847412	chr17_15846926_15847412	487	2	2.00775e-12	0.00585004	4.87474e-07	3.68974e-06	0.00161124	0.000796685	chr17	35060451	35060679	chr17_35060451_35060679	229	3	8.90824e-13	1.33307e-05	1.28514e-05	4.089e-06	0.00216258	0.00141697
SNORA69	SNORA69	chr17	15846926	15847412	chr17_15846926_15847412	487	2	2.00775e-12	0.00585004	4.87474e-07	3.68974e-06	0.00161124	0.000796685	chr17	72919704	72920187	chr17_72919704_72920187	484	3	3.75051e-12	0.000701176	0.000442484	0.000341723	0.0010281	0.000843379
SNORA69	SNORA69	chr17	15846926	15847412	chr17_15846926_15847412	487	2	2.00775e-12	0.00585004	4.87474e-07	3.68974e-06	0.00161124	0.000796685	chr17	77783551	77784110	chr17_77783551_77784110	560	3	5.98571e-13	0.000300909	3.20555e-05	6.23801e-06	0.000667662	0.000328229
SNORA69	SNORA69	chr17	76921829	76922138	chr17_76921829_76922138	310	3	7.72158e-14	0.00610029	3.85573e-08	1.34663e-06	-0.00211196	-0.000692641	chr17	35060451	35060679	chr17_35060451_35060679	229	3	8.90824e-13	1.33307e-05	1.28514e-05	4.089e-06	0.00216258	0.00141697
SNORA69	SNORA69	chr17	76921829	76922138	chr17_76921829_76922138	310	3	7.72158e-14	0.00610029	3.85573e-08	1.34663e-06	-0.00211196	-0.000692641	chr17	72919704	72920187	chr17_72919704_72920187	484	3	3.75051e-12	0.000701176	0.000442484	0.000341723	0.0010281	0.000843379
SNORA69	SNORA69	chr17	76921829	76922138	chr17_76921829_76922138	310	3	7.72158e-14	0.00610029	3.85573e-08	1.34663e-06	-0.00211196	-0.000692641	chr17	77783551	77784110	chr17_77783551_77784110	560	3	5.98571e-13	0.000300909	3.20555e-05	6.23801e-06	0.000667662	0.000328229
SNORD36	SNORD36	chr13	113105097	113105962	chr13_113105097_113105962	866	5	3.02278e-14	0.00684724	5.70879e-08	4.20898e-07	0.00368289	0.00115887	chr13	112720927	112721425	chr13_112720927_112721425	499	3	5.77784e-13	0.0251202	0.0449875	0.0329645	0.00142367	0.00101572
SNORA15, TBX20	SNORA15	chr7	35292896	35293892	chr7_35292896_35293892	997	12	4.51291e-29	0.00690128	1.71365e-08	1.53492e-11	0.000795783	0.000145997	chr7	35293080	35294658	chr7_35293080_35294658	1579	14	1.68653e-34	4.29176e-08	0.000213988	1.3909e-09	0.00160901	0.000941865
HOXC11, HOTAIR, snoMe28S-Am2634	HOXC11	chr12	54367250	54367460	chr12_54367250_54367460	211	2	4.99559e-08	0.00780298	0.000121521	0.000448603	0.00018292	8.66227e-05	chr12	54367250	54367822	chr12_54367250_54367822	573	3	7.37769e-13	0.0156394	0.0168198	0.0165099	0.00134149	0.000816471
SNORA38, SNORA8, SNORD28, TBX18, SNORA20	SNORA38	chr6	85473773	85474595	chr6_85473773_85474595	823	11	5.07923e-15	0.00785775	1.37503e-06	2.58592e-07	0.000227856	4.33123e-05	chr6	85473238	85474595	chr6_85473238_85474595	1358	13	1.14918e-19	0.00632195	0.00611967	0.000455209	0.00216532	0.000779086
SNORA69	SNORA69	chr17	41466627	41467212	chr17_41466627_41467212	586	5	6.26171e-18	0.0104094	7.79725e-10	1.60724e-07	-0.00326877	-0.000649007	chr17	35060451	35060679	chr17_35060451_35060679	229	3	8.90824e-13	1.33307e-05	1.28514e-05	4.089e-06	0.00216258	0.00141697
SNORA69	SNORA69	chr17	41466627	41467212	chr17_41466627_41467212	586	5	6.26171e-18	0.0104094	7.79725e-10	1.60724e-07	-0.00326877	-0.000649007	chr17	72919704	72920187	chr17_72919704_72920187	484	3	3.75051e-12	0.000701176	0.000442484	0.000341723	0.0010281	0.000843379
SNORA69	SNORA69	chr17	41466627	41467212	chr17_41466627_41467212	586	5	6.26171e-18	0.0104094	7.79725e-10	1.60724e-07	-0.00326877	-0.000649007	chr17	77783551	77784110	chr17_77783551_77784110	560	3	5.98571e-13	0.000300909	3.20555e-05	6.23801e-06	0.000667662	0.000328229
SNORD36, SNORD37	SNORD36	chr13	45884877	45885173	chr13_45884877_45885173	297	2	4.57462e-10	0.0115741	3.96481e-06	2.59111e-05	-0.00141022	-0.000703042	chr13	53424812	53425257	chr13_53424812_53425257	446	2	8.48653e-13	0.00135367	0.00579132	0.00193353	0.000819326	0.00074089
SNORA69	SNORA69	chr17	46089218	46089993	chr17_46089218_46089993	776	7	5.36856e-17	0.0116398	1.9745e-08	2.27061e-07	0.000310896	7.78652e-05	chr17	35060451	35060679	chr17_35060451_35060679	229	3	8.90824e-13	1.33307e-05	1.28514e-05	4.089e-06	0.00216258	0.00141697
SNORA69	SNORA69	chr17	46089218	46089993	chr17_46089218_46089993	776	7	5.36856e-17	0.0116398	1.9745e-08	2.27061e-07	0.000310896	7.78652e-05	chr17	72919704	72920187	chr17_72919704_72920187	484	3	3.75051e-12	0.000701176	0.000442484	0.000341723	0.0010281	0.000843379
SNORA69	SNORA69	chr17	46089218	46089993	chr17_46089218_46089993	776	7	5.36856e-17	0.0116398	1.9745e-08	2.27061e-07	0.000310896	7.78652e-05	chr17	77783551	77784110	chr17_77783551_77784110	560	3	5.98571e-13	0.000300909	3.20555e-05	6.23801e-06	0.000667662	0.000328229
SNORA69	SNORA69	chr17	37355982	37356405	chr17_37355982_37356405	424	5	6.01384e-10	0.0116588	1.67565e-05	3.297e-05	-0.00119331	-0.000361558	chr17	35060451	35060679	chr17_35060451_35060679	229	3	8.90824e-13	1.33307e-05	1.28514e-05	4.089e-06	0.00216258	0.00141697
SNORA69	SNORA69	chr17	37355982	37356405	chr17_37355982_37356405	424	5	6.01384e-10	0.0116588	1.67565e-05	3.297e-05	-0.00119331	-0.000361558	chr17	72919704	72920187	chr17_72919704_72920187	484	3	3.75051e-12	0.000701176	0.000442484	0.000341723	0.0010281	0.000843379
SNORA69	SNORA69	chr17	37355982	37356405	chr17_37355982_37356405	424	5	6.01384e-10	0.0116588	1.67565e-05	3.297e-05	-0.00119331	-0.000361558	chr17	77783551	77784110	chr17_77783551_77784110	560	3	5.98571e-13	0.000300909	3.20555e-05	6.23801e-06	0.000667662	0.000328229
SNORA38, SNORA8, SNORD28, SNORA20	SNORA38	chr6	100676745	100677145	chr6_100676745_100677145	401	7	8.31676e-13	0.0128881	2.37515e-08	4.4189e-06	-0.0013837	-0.000185607	chr6	100050506	100051841	chr6_100050506_100051841	1336	11	1.76331e-19	0.00013563	0.0231118	4.12642e-05	0.00113676	0.000571765
SNORA38, SNORA8, SNORD28, SNORA20	SNORA38	chr6	100676745	100677145	chr6_100676745_100677145	401	7	8.31676e-13	0.0128881	2.37515e-08	4.4189e-06	-0.0013837	-0.000185607	chr6	100912906	100913592	chr6_100912906_100913592	687	6	1.80809e-27	4.28586e-09	3.88355e-06	9.55214e-10	0.00153584	0.00100345
SNORA38, SNORA8, SNORD28, SNORA20	SNORA38	chr6	100676745	100677145	chr6_100676745_100677145	401	7	8.31676e-13	0.0128881	2.37515e-08	4.4189e-06	-0.0013837	-0.000185607	chr6	105388668	105389599	chr6_105388668_105389599	932	6	5.95507e-16	1.21248e-07	0.000447273	1.48279e-07	0.00466408	0.00225804
SNORD65	SNORD65	chr4	122618377	122618732	chr4_122618377_122618732	356	4	2.31243e-15	0.0129979	9.90644e-09	8.33825e-07	-0.00117308	-0.000298265	chr4	147557774	147558544	chr4_147557774_147558544	771	5	7.67906e-30	3.06944e-07	3.8564e-08	1.42195e-12	0.00301389	0.00222257
SNORD65	SNORD65	chr4	122618377	122618732	chr4_122618377_122618732	356	4	2.31243e-15	0.0129979	9.90644e-09	8.33825e-07	-0.00117308	-0.000298265	chr4	174443366	174443865	chr4_174443366_174443865	500	4	2.23518e-12	0.000740629	0.030307	0.00204937	0.00148324	0.00120957
LSP1	LSP1	chr11	2444462	2444899	chr11_2444462_2444899	438	6	6.14402e-09	0.0133085	2.35818e-05	0.000134404	0.00138309	0.000200005	chr11	20184487	20184718	chr11_20184487_20184718	232	3	8.37117e-12	0.0104245	0.0318836	0.0116752	0.00147183	0.00102292
SNORA69	SNORA69	chr17	43224180	43224582	chr17_43224180_43224582	403	7	1.19271e-09	0.013634	2.31731e-05	4.81286e-05	-0.00120902	-0.000347425	chr17	35060451	35060679	chr17_35060451_35060679	229	3	8.90824e-13	1.33307e-05	1.28514e-05	4.089e-06	0.00216258	0.00141697
SNORA69	SNORA69	chr17	43224180	43224582	chr17_43224180_43224582	403	7	1.19271e-09	0.013634	2.31731e-05	4.81286e-05	-0.00120902	-0.000347425	chr17	72919704	72920187	chr17_72919704_72920187	484	3	3.75051e-12	0.000701176	0.000442484	0.000341723	0.0010281	0.000843379
SNORA69	SNORA69	chr17	43224180	43224582	chr17_43224180_43224582	403	7	1.19271e-09	0.013634	2.31731e-05	4.81286e-05	-0.00120902	-0.000347425	chr17	77783551	77784110	chr17_77783551_77784110	560	3	5.98571e-13	0.000300909	3.20555e-05	6.23801e-06	0.000667662	0.000328229
SNORD65	SNORD65	chr4	141172895	141174257	chr4_141172895_141174257	1363	5	1.41049e-28	0.0138604	6.19695e-13	1.4736e-09	0.00211838	0.000399852	chr4	147557774	147558544	chr4_147557774_147558544	771	5	7.67906e-30	3.06944e-07	3.8564e-08	1.42195e-12	0.00301389	0.00222257
SNORD65	SNORD65	chr4	141172895	141174257	chr4_141172895_141174257	1363	5	1.41049e-28	0.0138604	6.19695e-13	1.4736e-09	0.00211838	0.000399852	chr4	174443366	174443865	chr4_174443366_174443865	500	4	2.23518e-12	0.000740629	0.030307	0.00204937	0.00148324	0.00120957
KCNA4	KCNA4	chr11	30038286	30039113	chr11_30038286_30039113	828	14	1.12598e-43	0.0140905	8.05876e-12	3.47768e-12	0.0013297	0.000196376	chr11	30038286	30038797	chr11_30038286_30038797	512	11	1.727e-12	0.0294832	0.121835	0.0312819	0.0022548	0.0012073
LSP1	LSP1	chr11	1892038	1892608	chr11_1892038_1892608	571	9	1.30794e-12	0.0141167	2.65664e-05	1.55202e-06	-0.00131833	-0.000392171	chr11	20184487	20184718	chr11_20184487_20184718	232	3	8.37117e-12	0.0104245	0.0318836	0.0116752	0.00147183	0.00102292
SNORD36	SNORD36	chr13	96085241	96085504	chr13_96085241_96085504	264	2	4.10613e-12	0.0147164	1.71365e-07	1.45786e-06	-0.00137235	-0.000681118	chr13	112720927	112721425	chr13_112720927_112721425	499	3	5.77784e-13	0.0251202	0.0449875	0.0329645	0.00142367	0.00101572
SNORA38, SNORA8, SNORD28, SIM1, SNORA20	SNORA38	chr6	100909238	100909443	chr6_100909238_100909443	206	2	1.31762e-07	0.0152855	3.8106e-06	2.55153e-05	0.000195655	0.00010283	chr6	100903227	100903575	chr6_100903227_100903575	349	3	6.01524e-12	0.0292306	0.0113734	0.0174458	0.00190495	0.00111523
SNORD65	SNORD65	chr4	128650393	128651221	chr4_128650393_128651221	829	3	2.00839e-13	0.0158017	2.11711e-07	6.61348e-06	-0.00123586	-0.000404756	chr4	147557774	147558544	chr4_147557774_147558544	771	5	7.67906e-30	3.06944e-07	3.8564e-08	1.42195e-12	0.00301389	0.00222257
SNORD65	SNORD65	chr4	128650393	128651221	chr4_128650393_128651221	829	3	2.00839e-13	0.0158017	2.11711e-07	6.61348e-06	-0.00123586	-0.000404756	chr4	174443366	174443865	chr4_174443366_174443865	500	4	2.23518e-12	0.000740629	0.030307	0.00204937	0.00148324	0.00120957
SNORA38, SNORA8, OSTM1-AS1, SNORD28, OSTM1, SNORA20	SNORA38	chr6	108454859	108455338	chr6_108454859_108455338	480	5	1.23468e-11	0.0167682	1.4487e-05	1.6936e-06	0.000794577	0.000219275	chr6	108478650	108479584	chr6_108478650_108479584	935	9	4.42584e-23	4.24102e-06	1.55689e-05	1.58511e-08	0.00237863	0.000887685
SNORA69	SNORA69	chr17	78475383	78475995	chr17_78475383_78475995	613	4	9.15407e-08	0.0167772	1.22263e-05	0.000139688	0.00204673	0.000548836	chr17	35060451	35060679	chr17_35060451_35060679	229	3	8.90824e-13	1.33307e-05	1.28514e-05	4.089e-06	0.00216258	0.00141697
SNORA69	SNORA69	chr17	78475383	78475995	chr17_78475383_78475995	613	4	9.15407e-08	0.0167772	1.22263e-05	0.000139688	0.00204673	0.000548836	chr17	72919704	72920187	chr17_72919704_72920187	484	3	3.75051e-12	0.000701176	0.000442484	0.000341723	0.0010281	0.000843379
SNORA69	SNORA69	chr17	78475383	78475995	chr17_78475383_78475995	613	4	9.15407e-08	0.0167772	1.22263e-05	0.000139688	0.00204673	0.000548836	chr17	77783551	77784110	chr17_77783551_77784110	560	3	5.98571e-13	0.000300909	3.20555e-05	6.23801e-06	0.000667662	0.000328229
SNORA69	SNORA69	chr17	15245089	15245237	chr17_15245089_15245237	149	5	4.66359e-07	0.0185248	1.94511e-05	0.000247054	0.00063287	0.000151923	chr17	35060451	35060679	chr17_35060451_35060679	229	3	8.90824e-13	1.33307e-05	1.28514e-05	4.089e-06	0.00216258	0.00141697
SNORA69	SNORA69	chr17	15245089	15245237	chr17_15245089_15245237	149	5	4.66359e-07	0.0185248	1.94511e-05	0.000247054	0.00063287	0.000151923	chr17	72919704	72920187	chr17_72919704_72920187	484	3	3.75051e-12	0.000701176	0.000442484	0.000341723	0.0010281	0.000843379
SNORA69	SNORA69	chr17	15245089	15245237	chr17_15245089_15245237	149	5	4.66359e-07	0.0185248	1.94511e-05	0.000247054	0.00063287	0.000151923	chr17	77783551	77784110	chr17_77783551_77784110	560	3	5.98571e-13	0.000300909	3.20555e-05	6.23801e-06	0.000667662	0.000328229
SNORA69	SNORA69	chr17	40428759	40429406	chr17_40428759_40429406	648	5	9.87782e-30	0.0186964	1.12712e-11	1.61195e-08	0.000364995	6.51133e-05	chr17	35060451	35060679	chr17_35060451_35060679	229	3	8.90824e-13	1.33307e-05	1.28514e-05	4.089e-06	0.00216258	0.00141697
SNORA69	SNORA69	chr17	40428759	40429406	chr17_40428759_40429406	648	5	9.87782e-30	0.0186964	1.12712e-11	1.61195e-08	0.000364995	6.51133e-05	chr17	72919704	72920187	chr17_72919704_72920187	484	3	3.75051e-12	0.000701176	0.000442484	0.000341723	0.0010281	0.000843379
SNORA69	SNORA69	chr17	40428759	40429406	chr17_40428759_40429406	648	5	9.87782e-30	0.0186964	1.12712e-11	1.61195e-08	0.000364995	6.51133e-05	chr17	77783551	77784110	chr17_77783551_77784110	560	3	5.98571e-13	0.000300909	3.20555e-05	6.23801e-06	0.000667662	0.000328229
OCA2	OCA2	chr15	28343577	28344730	chr15_28343577_28344730	1154	14	5.92662e-29	0.0202823	1.001e-14	3.67907e-09	0.00167748	0.000111991	chr15	28344273	28344730	chr15_28344273_28344730	458	13	1.16654e-15	0.018106	0.00543872	0.0020431	0.00177421	0.000542382
SNORA69	SNORA69	chr17	21278628	21278879	chr17_21278628_21278879	252	2	2.71649e-08	0.0244659	1.12145e-05	6.97398e-05	0.00122841	0.000594501	chr17	35060451	35060679	chr17_35060451_35060679	229	3	8.90824e-13	1.33307e-05	1.28514e-05	4.089e-06	0.00216258	0.00141697
SNORA69	SNORA69	chr17	21278628	21278879	chr17_21278628_21278879	252	2	2.71649e-08	0.0244659	1.12145e-05	6.97398e-05	0.00122841	0.000594501	chr17	72919704	72920187	chr17_72919704_72920187	484	3	3.75051e-12	0.000701176	0.000442484	0.000341723	0.0010281	0.000843379
SNORA69	SNORA69	chr17	21278628	21278879	chr17_21278628_21278879	252	2	2.71649e-08	0.0244659	1.12145e-05	6.97398e-05	0.00122841	0.000594501	chr17	77783551	77784110	chr17_77783551_77784110	560	3	5.98571e-13	0.000300909	3.20555e-05	6.23801e-06	0.000667662	0.000328229
SNORD36, SNORD37	SNORD36	chr13	47126023	47126551	chr13_47126023_47126551	529	5	3.32851e-09	0.0247895	8.28558e-06	0.00021042	-0.00149167	-0.000660903	chr13	53424812	53425257	chr13_53424812_53425257	446	2	8.48653e-13	0.00135367	0.00579132	0.00193353	0.000819326	0.00074089
SNORA69	SNORA69	chr17	16945298	16945603	chr17_16945298_16945603	306	5	1.35322e-08	0.0256373	7.27353e-05	5.41598e-05	0.000152989	6.36127e-05	chr17	35060451	35060679	chr17_35060451_35060679	229	3	8.90824e-13	1.33307e-05	1.28514e-05	4.089e-06	0.00216258	0.00141697
SNORA69	SNORA69	chr17	16945298	16945603	chr17_16945298_16945603	306	5	1.35322e-08	0.0256373	7.27353e-05	5.41598e-05	0.000152989	6.36127e-05	chr17	72919704	72920187	chr17_72919704_72920187	484	3	3.75051e-12	0.000701176	0.000442484	0.000341723	0.0010281	0.000843379
SNORA69	SNORA69	chr17	16945298	16945603	chr17_16945298_16945603	306	5	1.35322e-08	0.0256373	7.27353e-05	5.41598e-05	0.000152989	6.36127e-05	chr17	77783551	77784110	chr17_77783551_77784110	560	3	5.98571e-13	0.000300909	3.20555e-05	6.23801e-06	0.000667662	0.000328229
SNORD36	SNORD36	chr13	112728349	112728964	chr13_112728349_112728964	616	6	3.24818e-08	0.0284334	1.81314e-05	0.000185379	0.000318434	0.000100856	chr13	112720927	112721425	chr13_112720927_112721425	499	3	5.77784e-13	0.0251202	0.0449875	0.0329645	0.00142367	0.00101572
snoU13, Y_RNA, SCARNA16, SNORD112, SNORA63, U3, SNORA51, SNORA25, SNORD59, RP11-139I14.2, SCARNA20, SNORA67, U6, SNORA70, SNORA77, SNORA26, SNORA72, U8, SNORA31, SNORA40, SNORD64, ACA64, SNORD78, snoU109, SNORD60, SNORD116	snoU13	chr1	156357839	156358612	chr1_156357839_156358612	774	10	1.41238e-08	0.0304524	2.75293e-05	3.25509e-05	0.00114271	0.000276858	chr1	156357839	156358612	chr1_156357839_156358612	774	11	9.57786e-14	0.00165109	0.0798422	0.00767156	0.00177895	0.00111006
SNORA69	SNORA69	chr17	45307312	45307606	chr17_45307312_45307606	295	4	1.41219e-19	0.0310509	1.23282e-11	5.28871e-09	-0.00211902	-0.000523757	chr17	35060451	35060679	chr17_35060451_35060679	229	3	8.90824e-13	1.33307e-05	1.28514e-05	4.089e-06	0.00216258	0.00141697
SNORA69	SNORA69	chr17	45307312	45307606	chr17_45307312_45307606	295	4	1.41219e-19	0.0310509	1.23282e-11	5.28871e-09	-0.00211902	-0.000523757	chr17	72919704	72920187	chr17_72919704_72920187	484	3	3.75051e-12	0.000701176	0.000442484	0.000341723	0.0010281	0.000843379
SNORA69	SNORA69	chr17	45307312	45307606	chr17_45307312_45307606	295	4	1.41219e-19	0.0310509	1.23282e-11	5.28871e-09	-0.00211902	-0.000523757	chr17	77783551	77784110	chr17_77783551_77784110	560	3	5.98571e-13	0.000300909	3.20555e-05	6.23801e-06	0.000667662	0.000328229
SNORA69	SNORA69	chr17	77070546	77070844	chr17_77070546_77070844	299	5	1.8389e-18	0.0311707	6.21228e-11	5.90411e-08	-0.00198644	-0.000290793	chr17	35060451	35060679	chr17_35060451_35060679	229	3	8.90824e-13	1.33307e-05	1.28514e-05	4.089e-06	0.00216258	0.00141697
SNORA69	SNORA69	chr17	77070546	77070844	chr17_77070546_77070844	299	5	1.8389e-18	0.0311707	6.21228e-11	5.90411e-08	-0.00198644	-0.000290793	chr17	72919704	72920187	chr17_72919704_72920187	484	3	3.75051e-12	0.000701176	0.000442484	0.000341723	0.0010281	0.000843379
SNORA69	SNORA69	chr17	77070546	77070844	chr17_77070546_77070844	299	5	1.8389e-18	0.0311707	6.21228e-11	5.90411e-08	-0.00198644	-0.000290793	chr17	77783551	77784110	chr17_77783551_77784110	560	3	5.98571e-13	0.000300909	3.20555e-05	6.23801e-06	0.000667662	0.000328229
