# Supplementary material for: DNA methylation perturbations may link altered development and aging in the lung
Source: Aging (Albany NY). 2021 Jan 19;13(2):1742–64. doi: 10.18632/aging.202544 (PMC7880367; doi:10.18632/aging.202544)
Supplement: Supplementary Table 6 [file aging-13-202544-s007.xlsx]

## Sheet: Sheet1
Supplementary Table 6. Summary statistics (number of CpGs) for the evaluated epigenome-wide age associations and their effect modification by phenotypes in the fetal and adult lung tissue.
Fetal Lung dataset
Model	Predictors	CpGsbonferroni	CpGsFDR<0.05	CpGsFDR<0.1	CpGsP<1e-05	CpGsP<0.05
CpG~age + IUS-exposure + sex + plate + sentrixpos + SV1 + PC1 + PC2 + PC3	Age	35846	94834	107537	48392	117725
CpG~age*sex + age + IUS-exposure + sex + plate + sentrixpos + SV1 + PC1 + PC2 + PC3	Age*Sex	0	0	3	7	22421
CpG~age*IUS-exposure + IUS-exposure + age + sex + plate + sentrixpos + SV1 + PC1 + PC2 + PC3	Age*IUS-exposure	0	0	0	6	20158
CpG~age*cotinine + cotinine + age + sex + plate + sentrixpos + SV1 + PC1 + PC2 + PC3	Age*Cotinine	0	0	0	1	11810
Adult Lung dataset
Model	Predictors	CpGsbonferroni	CpGsFDR<0.05	CpGsFDR<0.1	CpGsP<1e-05	CpGsP<0.05
CpG~age + COPD + sex + race + packyears + PLATE.ID + PC1 + PC2	Age	199	2217	3886	627	32712
CpG~age*sex + COPD + sex + race + pack-years + PLATE.ID + PC1 + PC2	Age*Sex	4	21	47	38	13145
CpG~age*pack-years + COPD + age + sex + race + pack-years + PLATE.ID + PC1 + PC2	Age*Pack-years	4	10	11	20	17700
CpG~age*COPD + COPD + age + sex + race + pack-years + PLATE.ID + PC1 + PC2	Age*COPD	0	0	0	11	28417
CpG~age*monthsquit + monthsquit + age + COPD + sex + race + pack-years + PLATE.ID + PC1 + PC2	Age*monthsquit	1	1	1	4	14275
CpG~age*LAA-950 + LAA-950 + age + sex + race + pack-years + PLATE.ID + PC1 + PC2	Age*LAA-950	0	0	0	1	9985
Notes:
sentrixpos: sentrix position, SV1: 1st surrogate variable, PC: principal components
For the adult lung dataset, the model with age associations was also tested after including the first surrogate variable similar to the fetal lung dataset. The findings have been included in the Supplementary Table 2.
For more description, please refer to manuscript methods section
