# Supplementary material for: DNA methylation perturbations may link altered development and aging in the lung
Source: Aging (Albany NY). 2021 Jan 19;13(2):1742–64. doi: 10.18632/aging.202544 (PMC7880367; doi:10.18632/aging.202544)
Supplement: Supplementary Table 7 [file aging-13-202544-s008.xlsx]

## Sheet: Sheet1
Supplementary Table 7. Differentially methylated CpGs with effect modification by age*sex interactions in fetal (n=3) and adult lung (n=47) dataset (FDR Adjusted P-Value < 0.10).
Fetal Lung data: All three CpGs were hypermethylated with age and in males compared to females
CGsite	chr	MAPINFO	Gene	Relation_to_Island	RefGene_Group	Beta-diff	AveBeta	t	P.Value	adj.P.Val
cg15021670	15	42386726	PLA2G4D	OpenSea	1stExon;5'UTR	0.00188747	0.812619	5.60114	5.62773e-07	0.0979855
cg15652303	19	51534136	KLK12	N_Shore	Body	0.00187506	0.894089	5.52417	7.52749e-07	0.0979855
cg22549626	12	121343033	SPPL3	S_Shore	TSS1500	0.00176193	0.807847	5.49463	8.41426e-07	0.0979855
LT-COPD data: The CpG sites were hyper- (22 CpGs) and hypo-methylated (25 CpGs) with age in males compared to females
CGsite	chr	MAPINFO	Gene	Relation_to_Island	RefGene_Group	Beta-diff	AveBeta	t	P.Value	adj.P.Val
cg10261601	2	240061601	HDAC4	Island	Body	0.000342836	0.992156	6.33801	2.94456e-09	0.00103008
cg08024097	16	712147	WDR90	N_Shore	Body	-0.00425706	0.959509	-5.79944	4.19502e-08	0.00733764
cg10864318	6	117002220	KPNA5	Island	TSS200	-0.000608228	0.0144545	-5.67522	7.59922e-08	0.00886134
cg13948230	10	126106957	OAT	Island	5'UTR	-0.000931727	0.00958102	-5.54394	1.4124e-07	0.0123523
cg21109518	1	43819313	MPL		3'UTR	-0.00362114	0.990516	-5.45137	2.1754e-07	0.0126836
cg06362729	4	131254713				-0.0025972	0.968531	-5.47031	1.99215e-07	0.0126836
cg09212489	4	108539552	PAPSS1		Body	-0.0038053	0.979017	-5.39968	2.76367e-07	0.0138115
cg12529083	12	13197360	KIAA1467	Island	1stExon	0.00116035	0.012105	5.32751	3.85119e-07	0.0166297
cg06266993	17	46671131	LOC404266	Island	Body	0.00122849	0.0286488	5.30451	4.27833e-07	0.0166297
cg01500570	17	78667767	RPTOR		Body	-0.00113058	0.961578	-5.26621	5.09427e-07	0.0178211
cg08415137	5	86176688				-0.00411192	0.055606	-5.16611	8.00938e-07	0.0213067
cg10927841	2	26407743	FAM59B	Island	Body	0.000937788	0.0122641	5.15048	8.59182e-07	0.0213067
cg21186299	7	100808810	VGF	Island	1stExon	0.00126414	0.0348533	5.14518	8.79838e-07	0.0213067
cg16543923	3	197353980	LOC220729	N_Shore	Body	0.0013157	0.0145262	5.17505	7.69407e-07	0.0213067
cg08693832	6	33084554	HLA-DPB2	N_Shore	Body	0.00404889	0.0986871	5.13678	9.13597e-07	0.0213067
cg16025444	19	14138714	RLN3	N_Shelf	TSS1500	-0.000767616	0.987321	-5.11723	9.97059e-07	0.0217998
cg23762579	10	134821210		N_Shore		-0.00533527	0.826702	-4.97925	1.83723e-06	0.0357062
cg11158440	19	13261480	IER2	Island	5'UTR	-0.00262401	0.0143034	-4.98562	1.78652e-06	0.0357062
cg01218150	13	20965971		Island		-0.00144019	0.983571	-4.8892	2.72226e-06	0.0471324
cg03963250	10	44198369		Island		-0.000841093	0.983416	-4.90072	2.58927e-06	0.0471324
cg17508477	13	113429562	ATP11A	S_Shore	Body	0.00415719	0.978344	4.8803	2.82935e-06	0.0471324
cg14204619	11	1469370	BRSK2	N_Shore	Body	-0.00186217	0.969455	-4.78647	4.23912e-06	0.0633312
cg01512719	13	49879770				-0.00116167	0.977565	-4.77488	4.45463e-06	0.0633312
cg10778288	12	113917994		Island		0.00166354	0.085197	4.78831	4.20576e-06	0.0633312
cg24724428	6	11044888	ELOVL2	Island	TSS1500	0.00701444	0.262114	4.77116	4.52591e-06	0.0633312
cg08125202	12	3274943	TSPAN9		5'UTR	0.00232287	0.988334	4.7454	5.05166e-06	0.0679694
cg22108809	5	56777663	ACTBL2		1stExon	0.00144645	0.991796	4.72004	5.62651e-06	0.0702964
cg02925601	6	27648605		S_Shore		0.0047802	0.157788	4.72407	5.53111e-06	0.0702964
cg01125333	16	2835331	PRSS33	Island	Body	-0.000350619	0.0162413	-4.70144	6.08789e-06	0.0709901
cg08799766	7	2801832	GNA12	N_Shore	Body	0.00334373	0.942083	4.70754	5.93275e-06	0.0709901
cg03963327	11	9025730	NRIP3	Island	TSS200	0.00132819	0.0428788	4.69182	6.34064e-06	0.0715522
cg07135478	17	1090677	ABR		TSS200	-0.000586429	0.0196828	-4.67737	6.7396e-06	0.0719314
cg14283569	19	51416213		Island		0.000276579	0.0142222	4.67508	6.80495e-06	0.0719314
cg07584066	17	57642749	DHX40	Island	TSS200	0.00660355	0.377991	4.66868	6.9911e-06	0.0719314
cg12360231	17	13926495	CDRT15P		TSS1500	0.00208689	0.979713	4.6497	7.57225e-06	0.0756849
cg26013143	13	20717576	GJA3	S_Shore	5'UTR	-0.00165159	0.970103	-4.62923	8.2513e-06	0.0801811
cg13221458	6	160112632	SOD2	N_Shore	Body	-0.00392612	0.109014	-4.5556	1.12143e-05	0.0834689
cg12675714	4	159592618	C4orf46	Island	Body	-0.00330453	0.0315806	-4.56607	1.07377e-05	0.0834689
cg23069297	2	242833648		S_Shore		-0.000923213	0.984217	-4.5754	1.03295e-05	0.0834689
cg25522355	18	65184600	DSEL	S_Shore	TSS1500	-0.000844411	0.022754	-4.5936	9.57601e-06	0.0834689
cg13517138	14	55658249	DLGAP5	Island	5'UTR	-0.0005623	0.0253261	-4.55604	1.11938e-05	0.0834689
cg22730072	7	76604421				-0.000551751	0.993183	-4.57505	1.03445e-05	0.0834689
cg22213264	3	179065832	MFN1	Island	5'UTR	-0.000537761	0.0251914	-4.57945	1.01569e-05	0.0834689
cg09086835	15	89922345	LOC254559	Island	Body	0.00197047	0.110509	4.55761	1.1121e-05	0.0834689
cg19401340	17	56833197	PPM1E	Island	TSS200	0.00211922	0.0716801	4.55687	1.11553e-05	0.0834689
cg23052830	14	61119919		N_Shelf		0.00283769	0.10315	4.56789	1.06569e-05	0.0834689
cg21972837	11	17207724				0.0033889	0.981886	4.60073	9.29549e-06	0.0834689
