# Supplementary material for: DNA methylation perturbations may link altered development and aging in the lung
Source: Aging (Albany NY). 2021 Jan 19;13(2):1742–64. doi: 10.18632/aging.202544 (PMC7880367; doi:10.18632/aging.202544)
Supplement: Supplementary Table 8 [file aging-13-202544-s009.xlsx]

## Sheet: Sheet1
Supplementary Table 8. Differentially methylated CpGs with effect modification by age*pack-years interactions (exposure to cigarette smoke; main predictor: age*pack-years) in adult lung tissue dataset (n=11; FDR adjusted P-Value<0.10). Eight of those 11 CpGs were hypomethylated with age with increasing pack-years. One CpG (SIM2) was nominally significant in the fetal lung age*cotinine interaction…
					Adult lung dataset					Fetal lung dataset
CGsite	MAPINFO	Gene	RefGene_Group	Relation_to_Island	Beta-diff	AveBeta	t	P.Value	adj.P.Val	Beta-diff	AveBeta	t	P.Value	adj.P.Val
cg00663000	154959074	FLAD1	Body		-5.00667e-05	0.973295	-5.92395	2.32428e-08	0.00522476
cg27468926	40697797	MAP3K10	1stExon	Island	1.57304e-05	0.0158826	5.87224	2.98706e-08	0.00522476
cg25754933	79429612	BAHCC1	Body	N_Shore	-0.000115761	0.934523	-5.57596	1.22741e-07	0.0107345
cg06109867	66002991	MAGI1	Body		-8.95122e-05	0.982499	-5.58999	1.14903e-07	0.0107345
cg03734783	150745709	ACCN3	1stExon	N_Shore	-9.98844e-05	0.973281	-5.47989	1.92331e-07	0.0112137
cg19001113	166071572	PDE10A	Body	N_Shelf	-7.8361e-05	0.980465	-5.51216	1.6548e-07	0.0112137
cg04099808	38115022	TBC1D1	Body		-9.23294e-05	0.968614	-5.40184	2.76092e-07	0.0137977
cg05548179	51425282				-0.000120894	0.226827	-5.3237	3.95256e-07	0.0172839
cg10682155	38077473	SIM2	Body	Island	2.1836e-05	0.0210004	5.26688	5.12059e-07	0.0186816	-2.73997e-06	0.0197146	-2.30432	0.0246814	0.999979
cg11288833	55489084	RSL24D1	1stExon	Island	2.61051e-05	0.0265059	5.25763	5.34026e-07	0.0186816
cg14424519	93657024	SYK	Body		-7.81401e-05	0.903055	-4.91671	2.43103e-06	0.0773124
