# Supplementary material for: DNA methylation perturbations may link altered development and aging in the lung
Source: Aging (Albany NY). 2021 Jan 19;13(2):1742–64. doi: 10.18632/aging.202544 (PMC7880367; doi:10.18632/aging.202544)
Supplement: Supplementary Table 9 [file aging-13-202544-s010.xlsx]

## Sheet: Sheet1
Supplementary Table 9. Gene enrichment analysis for the genes annotated to the overlapping hyper (210 CpGs, 120 genes) and hypo-methylated (five CpGs, five genes) age-associated DMPs between fetal and adult lung dataset (144 unique genes) using gProfiler2. Enrichment analysis identified over-representation of functions from Gene Ontology, biological pathways from KEGG and Reactome, wikiPathways, …
query	GO.ID	Description	term_size	intersection_size	Domain	FDR	Genes
query_1	GO:0000981	DNA-binding transcription factor activity, RNA polymerase II-specific	943	52	GO:MF	2.01e-33	EVX1,HIF1A,ALX3,SATB2,PITX2,NKX2-4,ZIC1,ZIC2,BSX,INSM1,TBX15,ESRRG,FOXG1,ZIC4,DLX1,ATOH1,HAND1,OLIG3,FEZF1,TBR1,HOXC4,GFI1,SHOX2,FEV,MAFB,FOXL2,SOX8,HOXC11,NR2E1,PAX6,OTX1,DMRT2,HIC1,ONECUT2,EVX2,TBX18,ZIC5,SIX1,KLF14,TP73,SOX21,LHX4,ALX1,TCF7,DMRTA2,PAX3,GATA5,SIM1,EMX1,MYEF2,TBX20,MYBL2
query_1	GO:0003700	DNA-binding transcription factor activity	1186	54	GO:MF	5.04e-31	EVX1,HIF1A,ALX3,SATB2,PITX2,NKX2-4,ZIC1,ZIC2,BSX,INSM1,TBX15,ESRRG,FOXG1,ZIC4,DLX1,ATOH1,HAND1,OLIG3,FEZF1,TBR1,HOXC4,GFI1,SHOX2,FEV,MAFB,FOXL2,SOX8,HOXC11,NR2E1,PAX6,OTX1,DMRT2,BNC1,HIC1,ONECUT2,EVX2,TBX18,ZIC5,SIX1,KLF14,TP73,SOX21,LHX4,ALX1,TCF7,DMRTA2,PAX3,GATA5,SIM1,EMX1,MYEF2,SALL3,TBX20,MYBL2
query_1	GO:0043565	sequence-specific DNA binding	1091	50	GO:MF	1.68e-28	EVX1,HIF1A,ALX3,SATB2,PITX2,NKX2-4,ZIC1,ZIC2,BSX,INSM1,TBX15,ESRRG,FOXG1,ZIC4,DLX1,ATOH1,HAND1,FEZF1,TBR1,HOXC4,SHOX2,FEV,MAFB,FOXL2,SOX8,HOXC11,NR2E1,PAX6,OTX1,DMRT2,HIC1,BRF1,ONECUT2,EVX2,TBX18,ZIC5,SIX1,KLF14,TP73,SOX21,LHX4,ALX1,TCF7,DMRTA2,PAX3,GATA5,EMX1,MYEF2,TBX20,MYBL2
query_1	GO:0140110	transcription regulator activity	1535	54	GO:MF	1.11e-25	EVX1,HIF1A,ALX3,SATB2,PITX2,NKX2-4,ZIC1,ZIC2,BSX,INSM1,TBX15,ESRRG,FOXG1,ZIC4,DLX1,ATOH1,HAND1,OLIG3,FEZF1,TBR1,HOXC4,GFI1,SHOX2,FEV,MAFB,FOXL2,SOX8,HOXC11,NR2E1,PAX6,OTX1,DMRT2,BNC1,HIC1,ONECUT2,EVX2,TBX18,ZIC5,SIX1,KLF14,TP73,SOX21,LHX4,ALX1,TCF7,DMRTA2,PAX3,GATA5,SIM1,EMX1,MYEF2,SALL3,TBX20,MYBL2
query_1	GO:0000976	transcription regulatory region sequence-specific DNA binding	797	41	GO:MF	1.32e-24	HIF1A,ALX3,SATB2,PITX2,NKX2-4,ZIC1,ZIC2,BSX,INSM1,TBX15,ESRRG,ZIC4,DLX1,ATOH1,HAND1,FEZF1,TBR1,HOXC4,MAFB,FOXL2,SOX8,HOXC11,NR2E1,PAX6,OTX1,DMRT2,BRF1,ONECUT2,TBX18,ZIC5,SIX1,TP73,SOX21,LHX4,ALX1,TCF7,GATA5,EMX1,MYEF2,TBX20,MYBL2
query_1	GO:0000977	RNA polymerase II regulatory region sequence-specific DNA binding	750	40	GO:MF	1.39e-24	HIF1A,ALX3,SATB2,PITX2,NKX2-4,ZIC1,ZIC2,BSX,INSM1,TBX15,ESRRG,ZIC4,DLX1,ATOH1,HAND1,FEZF1,TBR1,HOXC4,MAFB,FOXL2,SOX8,HOXC11,NR2E1,PAX6,OTX1,DMRT2,ONECUT2,TBX18,ZIC5,SIX1,TP73,SOX21,LHX4,ALX1,TCF7,GATA5,EMX1,MYEF2,TBX20,MYBL2
query_1	GO:0001012	RNA polymerase II regulatory region DNA binding	757	40	GO:MF	1.7e-24	HIF1A,ALX3,SATB2,PITX2,NKX2-4,ZIC1,ZIC2,BSX,INSM1,TBX15,ESRRG,ZIC4,DLX1,ATOH1,HAND1,FEZF1,TBR1,HOXC4,MAFB,FOXL2,SOX8,HOXC11,NR2E1,PAX6,OTX1,DMRT2,ONECUT2,TBX18,ZIC5,SIX1,TP73,SOX21,LHX4,ALX1,TCF7,GATA5,EMX1,MYEF2,TBX20,MYBL2
query_1	GO:1990837	sequence-specific double-stranded DNA binding	832	41	GO:MF	4.36e-24	HIF1A,ALX3,SATB2,PITX2,NKX2-4,ZIC1,ZIC2,BSX,INSM1,TBX15,ESRRG,ZIC4,DLX1,ATOH1,HAND1,FEZF1,TBR1,HOXC4,MAFB,FOXL2,SOX8,HOXC11,NR2E1,PAX6,OTX1,DMRT2,BRF1,ONECUT2,TBX18,ZIC5,SIX1,TP73,SOX21,LHX4,ALX1,TCF7,GATA5,EMX1,MYEF2,TBX20,MYBL2
query_1	GO:0001067	regulatory region nucleic acid binding	900	42	GO:MF	6.22e-24	HIF1A,ALX3,SATB2,PITX2,NKX2-4,ZIC1,ZIC2,BSX,INSM1,TBX15,ESRRG,ZIC4,DLX1,ATOH1,HAND1,FEZF1,TBR1,HOXC4,GFI1,MAFB,FOXL2,SOX8,HOXC11,NR2E1,PAX6,OTX1,DMRT2,BRF1,ONECUT2,TBX18,ZIC5,SIX1,TP73,SOX21,LHX4,ALX1,TCF7,GATA5,EMX1,MYEF2,TBX20,MYBL2
query_1	GO:0044212	transcription regulatory region DNA binding	899	42	GO:MF	6.22e-24	HIF1A,ALX3,SATB2,PITX2,NKX2-4,ZIC1,ZIC2,BSX,INSM1,TBX15,ESRRG,ZIC4,DLX1,ATOH1,HAND1,FEZF1,TBR1,HOXC4,GFI1,MAFB,FOXL2,SOX8,HOXC11,NR2E1,PAX6,OTX1,DMRT2,BRF1,ONECUT2,TBX18,ZIC5,SIX1,TP73,SOX21,LHX4,ALX1,TCF7,GATA5,EMX1,MYEF2,TBX20,MYBL2
query_1	GO:0003690	double-stranded DNA binding	911	41	GO:MF	1.03e-22	HIF1A,ALX3,SATB2,PITX2,NKX2-4,ZIC1,ZIC2,BSX,INSM1,TBX15,ESRRG,ZIC4,DLX1,ATOH1,HAND1,FEZF1,TBR1,HOXC4,MAFB,FOXL2,SOX8,HOXC11,NR2E1,PAX6,OTX1,DMRT2,BRF1,ONECUT2,TBX18,ZIC5,SIX1,TP73,SOX21,LHX4,ALX1,TCF7,GATA5,EMX1,MYEF2,TBX20,MYBL2
query_1	GO:0000790	nuclear chromatin	959	41	GO:CC	5.4e-21	EVX1,HIF1A,ALX3,SATB2,PITX2,NKX2-4,BSX,TBX15,ESRRG,FOXG1,DLX1,ATOH1,HAND1,OLIG3,HOXC4,SHOX2,FEV,MAFB,FOXL2,SOX8,HOXC11,NR2E1,PAX6,OTX1,DMRT2,ONECUT2,EVX2,TBX18,SIX1,KLF14,TP73,SOX21,LHX4,ALX1,TCF7,DMRTA2,PAX3,GATA5,SIM1,EMX1,TBX20
query_1	GO:0003677	DNA binding	2231	57	GO:MF	7.03e-21	EVX1,HIF1A,ALX3,SATB2,PITX2,NKX2-4,ZIC1,ZIC2,BSX,INSM1,TBX15,ESRRG,FOXG1,ZIC4,ZNF518A,DLX1,ATOH1,HAND1,OLIG3,FEZF1,TBR1,HOXC4,GFI1,SHOX2,FEV,MAFB,FOXL2,SOX8,HOXC11,NR2E1,PAX6,OTX1,DMRT2,BNC1,HIC1,BRF1,ONECUT2,EVX2,TBX18,ZIC5,HMG20B,SIX1,KLF14,TP73,SOX21,LHX4,ALX1,TCF7,DMRTA2,PAX3,GATA5,SIM1,EMX1,MYEF2,SALL3,TBX20,MYBL2
query_1	GO:0000785	chromatin	1101	42	GO:CC	5.24e-20	EVX1,HIF1A,ALX3,SATB2,PITX2,NKX2-4,BSX,TBX15,ESRRG,FOXG1,DLX1,ATOH1,HAND1,OLIG3,HOXC4,SHOX2,FEV,MAFB,FOXL2,SOX8,HOXC11,NR2E1,PAX6,OTX1,DMRT2,HIC1,ONECUT2,EVX2,TBX18,SIX1,KLF14,TP73,SOX21,LHX4,ALX1,TCF7,DMRTA2,PAX3,GATA5,SIM1,EMX1,TBX20
query_1	GO:0000987	cis-regulatory region sequence-specific DNA binding	589	32	GO:MF	1.16e-19	HIF1A,SATB2,PITX2,NKX2-4,ZIC1,BSX,INSM1,TBX15,DLX1,ATOH1,HAND1,FEZF1,TBR1,HOXC4,MAFB,FOXL2,SOX8,HOXC11,NR2E1,PAX6,OTX1,BRF1,ONECUT2,SIX1,TP73,SOX21,TCF7,GATA5,EMX1,MYEF2,TBX20,MYBL2
query_1	GO:0035326	cis-regulatory region binding	595	32	GO:MF	1.46e-19	HIF1A,SATB2,PITX2,NKX2-4,ZIC1,BSX,INSM1,TBX15,DLX1,ATOH1,HAND1,FEZF1,TBR1,HOXC4,MAFB,FOXL2,SOX8,HOXC11,NR2E1,PAX6,OTX1,BRF1,ONECUT2,SIX1,TP73,SOX21,TCF7,GATA5,EMX1,MYEF2,TBX20,MYBL2
query_1	GO:0000228	nuclear chromosome	1146	41	GO:CC	1.41e-18	EVX1,HIF1A,ALX3,SATB2,PITX2,NKX2-4,BSX,TBX15,ESRRG,FOXG1,DLX1,ATOH1,HAND1,OLIG3,HOXC4,SHOX2,FEV,MAFB,FOXL2,SOX8,HOXC11,NR2E1,PAX6,OTX1,DMRT2,ONECUT2,EVX2,TBX18,SIX1,KLF14,TP73,SOX21,LHX4,ALX1,TCF7,DMRTA2,PAX3,GATA5,SIM1,EMX1,TBX20
query_1	GO:0000978	RNA polymerase II cis-regulatory region sequence-specific DNA binding	563	30	GO:MF	3.81e-18	HIF1A,SATB2,PITX2,NKX2-4,ZIC1,BSX,INSM1,TBX15,DLX1,ATOH1,HAND1,FEZF1,TBR1,HOXC4,MAFB,FOXL2,HOXC11,NR2E1,PAX6,OTX1,ONECUT2,SIX1,TP73,SOX21,TCF7,GATA5,EMX1,MYEF2,TBX20,MYBL2
query_1	GO:0006357	regulation of transcription by RNA polymerase II	2000	52	GO:BP	6.07e-17	EVX1,HIF1A,ALX3,SATB2,PITX2,NKX2-4,ZIC1,ZIC2,BSX,INSM1,TBX15,ESRRG,FOXG1,ZIC4,DLX1,ATOH1,HAND1,OLIG3,FEZF1,TBR1,HOXC4,GFI1,SHOX2,FEV,MAFB,FOXL2,SOX8,HOXC11,NR2E1,PAX6,OTX1,DMRT2,HIC1,ONECUT2,EVX2,TBX18,ZIC5,SIX1,KLF14,TP73,SOX21,LHX4,ALX1,TCF7,DMRTA2,PAX3,GATA5,SIM1,EMX1,MYEF2,TBX20,MYBL2
query_1	GO:0005694	chromosome	1517	44	GO:CC	8.6e-17	EVX1,HIF1A,ALX3,SATB2,PITX2,NKX2-4,BSX,TBX15,ESRRG,FOXG1,DLX1,ATOH1,HAND1,OLIG3,HOXC4,SHOX2,FEV,MAFB,FOXL2,SOX8,HOXC11,NR2E1,PAX6,OTX1,DMRT2,HIC1,ONECUT2,EVX2,TBX18,HMG20B,SIX1,KLF14,TP73,SOX21,LHX4,ALX1,TCF7,DMRTA2,PAX3,GATA5,SIM1,EMX1,TBX20,MYBL2
query_1	GO:0001228	DNA-binding transcription activator activity, RNA polymerase II-specific	407	25	GO:MF	2.19e-16	HIF1A,SATB2,ZIC1,TBX15,ESRRG,ATOH1,TBR1,HOXC4,MAFB,FOXL2,SOX8,HOXC11,NR2E1,PAX6,OTX1,ONECUT2,TBX18,SIX1,KLF14,TP73,SOX21,LHX4,ALX1,TBX20,MYBL2
query_1	GO:0001216	DNA-binding transcription activator activity	410	25	GO:MF	2.46e-16	HIF1A,SATB2,ZIC1,TBX15,ESRRG,ATOH1,TBR1,HOXC4,MAFB,FOXL2,SOX8,HOXC11,NR2E1,PAX6,OTX1,ONECUT2,TBX18,SIX1,KLF14,TP73,SOX21,LHX4,ALX1,TBX20,MYBL2
query_1	GO:0006366	transcription by RNA polymerase II	2128	52	GO:BP	4.91e-16	EVX1,HIF1A,ALX3,SATB2,PITX2,NKX2-4,ZIC1,ZIC2,BSX,INSM1,TBX15,ESRRG,FOXG1,ZIC4,DLX1,ATOH1,HAND1,OLIG3,FEZF1,TBR1,HOXC4,GFI1,SHOX2,FEV,MAFB,FOXL2,SOX8,HOXC11,NR2E1,PAX6,OTX1,DMRT2,HIC1,ONECUT2,EVX2,TBX18,ZIC5,SIX1,KLF14,TP73,SOX21,LHX4,ALX1,TCF7,DMRTA2,PAX3,GATA5,SIM1,EMX1,MYEF2,TBX20,MYBL2
query_1	GO:0007389	pattern specification process	418	25	GO:BP	1.51e-14	EVX1,HIF1A,ALX3,SATB2,PITX2,ZIC1,FOXG1,DLX1,HAND1,FEZF1,TBR1,HOXC4,MAFB,HOXC11,PAX6,OTX1,DMRT2,TBX18,WNT2B,SIX1,ALX1,DMRTA2,GATA5,EMX1,TBX20
query_1	GO:0048562	embryonic organ morphogenesis	289	21	GO:BP	1.05e-13	HIF1A,ALX3,SATB2,ZIC1,TBX15,FOXG1,ATOH1,HAND1,TBR1,MYO3A,HOXC4,SHOX2,MAFB,FOXL2,HOXC11,PAX6,OTX1,SIX1,ALX1,TCF7,TBX20
query_1	GO:0045944	positive regulation of transcription by RNA polymerase II	1116	36	GO:BP	1.05e-13	EVX1,HIF1A,SATB2,PITX2,NKX2-4,ZIC1,BSX,TBX15,ESRRG,DLX1,ATOH1,HAND1,TBR1,HOXC4,GFI1,MAFB,FOXL2,SOX8,HOXC11,NR2E1,PAX6,OTX1,DMRT2,ONECUT2,TBX18,SIX1,KLF14,TP73,SOX21,LHX4,ALX1,PAX3,GATA5,SIM1,TBX20,MYBL2
query_1	GO:0006355	regulation of transcription, DNA-templated	3042	57	GO:BP	3.05e-13	EVX1,HIF1A,TRAPPC9,ALX3,SATB2,PITX2,NKX2-4,ZIC1,ZIC2,BSX,INSM1,TBX15,ESRRG,FOXG1,ZIC4,ZNF518A,DLX1,ATOH1,HAND1,OLIG3,FEZF1,TBR1,HOXC4,GFI1,SHOX2,FEV,MAFB,FOXL2,SOX8,HOXC11,NR2E1,PAX6,OTX1,DMRT2,BNC1,HIC1,BRF1,ONECUT2,EVX2,TBX18,ZIC5,SIX1,KLF14,TP73,SOX21,LHX4,ALX1,TCF7,DMRTA2,PAX3,GATA5,SIM1,EMX1,MYEF2,SALL3,TBX20,MYBL2
query_1	GO:0045893	positive regulation of transcription, DNA-templated	1417	39	GO:BP	4.4e-13	EVX1,HIF1A,SATB2,PITX2,NKX2-4,ZIC1,ZIC2,BSX,TBX15,ESRRG,DLX1,ATOH1,HAND1,FEZF1,TBR1,HOXC4,GFI1,MAFB,FOXL2,SOX8,HOXC11,NR2E1,PAX6,OTX1,DMRT2,BRF1,ONECUT2,TBX18,SIX1,KLF14,TP73,SOX21,LHX4,ALX1,PAX3,GATA5,SIM1,TBX20,MYBL2
query_1	GO:1903506	regulation of nucleic acid-templated transcription	3088	57	GO:BP	4.4e-13	EVX1,HIF1A,TRAPPC9,ALX3,SATB2,PITX2,NKX2-4,ZIC1,ZIC2,BSX,INSM1,TBX15,ESRRG,FOXG1,ZIC4,ZNF518A,DLX1,ATOH1,HAND1,OLIG3,FEZF1,TBR1,HOXC4,GFI1,SHOX2,FEV,MAFB,FOXL2,SOX8,HOXC11,NR2E1,PAX6,OTX1,DMRT2,BNC1,HIC1,BRF1,ONECUT2,EVX2,TBX18,ZIC5,SIX1,KLF14,TP73,SOX21,LHX4,ALX1,TCF7,DMRTA2,PAX3,GATA5,SIM1,EMX1,MYEF2,SALL3,TBX20,MYBL2
query_1	GO:2001141	regulation of RNA biosynthetic process	3092	57	GO:BP	4.4e-13	EVX1,HIF1A,TRAPPC9,ALX3,SATB2,PITX2,NKX2-4,ZIC1,ZIC2,BSX,INSM1,TBX15,ESRRG,FOXG1,ZIC4,ZNF518A,DLX1,ATOH1,HAND1,OLIG3,FEZF1,TBR1,HOXC4,GFI1,SHOX2,FEV,MAFB,FOXL2,SOX8,HOXC11,NR2E1,PAX6,OTX1,DMRT2,BNC1,HIC1,BRF1,ONECUT2,EVX2,TBX18,ZIC5,SIX1,KLF14,TP73,SOX21,LHX4,ALX1,TCF7,DMRTA2,PAX3,GATA5,SIM1,EMX1,MYEF2,SALL3,TBX20,MYBL2
query_1	GO:0006351	transcription, DNA-templated	3186	57	GO:BP	1.4e-12	EVX1,HIF1A,TRAPPC9,ALX3,SATB2,PITX2,NKX2-4,ZIC1,ZIC2,BSX,INSM1,TBX15,ESRRG,FOXG1,ZIC4,ZNF518A,DLX1,ATOH1,HAND1,OLIG3,FEZF1,TBR1,HOXC4,GFI1,SHOX2,FEV,MAFB,FOXL2,SOX8,HOXC11,NR2E1,PAX6,OTX1,DMRT2,BNC1,HIC1,BRF1,ONECUT2,EVX2,TBX18,ZIC5,SIX1,KLF14,TP73,SOX21,LHX4,ALX1,TCF7,DMRTA2,PAX3,GATA5,SIM1,EMX1,MYEF2,SALL3,TBX20,MYBL2
query_1	GO:0009887	animal organ morphogenesis	1034	33	GO:BP	1.4e-12	HIF1A,ALX3,SATB2,PITX2,ZIC1,BSX,TBX15,FOXG1,DLX1,ATOH1,HAND1,TBR1,MYO3A,HOXC4,SHOX2,MAFB,FOXL2,SOX8,HOXC11,PAX6,OTX1,PARVA,ONECUT2,WNT2B,SIX1,TUFT1,LHX4,ALX1,TCF7,PAX3,GATA5,EMX1,TBX20
query_1	GO:0009790	embryo development	972	32	GO:BP	1.4e-12	EVX1,HIF1A,ALX3,SATB2,ZIC1,DSC3,TBX15,FOXG1,DLX1,ATOH1,HAND1,TBR1,MYO3A,HOXC4,SHOX2,MAFB,FOXL2,SOX8,HOXC11,PAX6,OTX1,DMRT2,TBX18,WNT2B,SIX1,ALX1,MMP9,TCF7,EMX1,NECAB1,TUBB2B,TBX20
query_1	GO:1902680	positive regulation of RNA biosynthetic process	1492	39	GO:BP	1.4e-12	EVX1,HIF1A,SATB2,PITX2,NKX2-4,ZIC1,ZIC2,BSX,TBX15,ESRRG,DLX1,ATOH1,HAND1,FEZF1,TBR1,HOXC4,GFI1,MAFB,FOXL2,SOX8,HOXC11,NR2E1,PAX6,OTX1,DMRT2,BRF1,ONECUT2,TBX18,SIX1,KLF14,TP73,SOX21,LHX4,ALX1,PAX3,GATA5,SIM1,TBX20,MYBL2
query_1	GO:1903508	positive regulation of nucleic acid-templated transcription	1491	39	GO:BP	1.4e-12	EVX1,HIF1A,SATB2,PITX2,NKX2-4,ZIC1,ZIC2,BSX,TBX15,ESRRG,DLX1,ATOH1,HAND1,FEZF1,TBR1,HOXC4,GFI1,MAFB,FOXL2,SOX8,HOXC11,NR2E1,PAX6,OTX1,DMRT2,BRF1,ONECUT2,TBX18,SIX1,KLF14,TP73,SOX21,LHX4,ALX1,PAX3,GATA5,SIM1,TBX20,MYBL2
query_1	GO:0045165	cell fate commitment	264	19	GO:BP	1.4e-12	EVX1,SATB2,TBX15,FOXG1,DLX1,ATOH1,OLIG3,TBR1,FEV,SOX8,NR2E1,PAX6,ONECUT2,TBX18,WNT2B,SIX1,DMRTA2,GATA5,TBX20
query_1	GO:0051252	regulation of RNA metabolic process	3308	58	GO:BP	1.4e-12	EVX1,HIF1A,TRAPPC9,ALX3,SATB2,PITX2,NKX2-4,ZIC1,EXOSC2,ZIC2,BSX,INSM1,TBX15,ESRRG,FOXG1,ZIC4,ZNF518A,DLX1,ATOH1,HAND1,OLIG3,FEZF1,TBR1,HOXC4,GFI1,SHOX2,FEV,MAFB,FOXL2,SOX8,HOXC11,NR2E1,PAX6,OTX1,DMRT2,BNC1,HIC1,BRF1,ONECUT2,EVX2,TBX18,ZIC5,SIX1,KLF14,TP73,SOX21,LHX4,ALX1,TCF7,DMRTA2,PAX3,GATA5,SIM1,EMX1,MYEF2,SALL3,TBX20,MYBL2
query_1	GO:0097659	nucleic acid-templated transcription	3222	57	GO:BP	1.51e-12	EVX1,HIF1A,TRAPPC9,ALX3,SATB2,PITX2,NKX2-4,ZIC1,ZIC2,BSX,INSM1,TBX15,ESRRG,FOXG1,ZIC4,ZNF518A,DLX1,ATOH1,HAND1,OLIG3,FEZF1,TBR1,HOXC4,GFI1,SHOX2,FEV,MAFB,FOXL2,SOX8,HOXC11,NR2E1,PAX6,OTX1,DMRT2,BNC1,HIC1,BRF1,ONECUT2,EVX2,TBX18,ZIC5,SIX1,KLF14,TP73,SOX21,LHX4,ALX1,TCF7,DMRTA2,PAX3,GATA5,SIM1,EMX1,MYEF2,SALL3,TBX20,MYBL2
query_1	GO:0032774	RNA biosynthetic process	3233	57	GO:BP	1.66e-12	EVX1,HIF1A,TRAPPC9,ALX3,SATB2,PITX2,NKX2-4,ZIC1,ZIC2,BSX,INSM1,TBX15,ESRRG,FOXG1,ZIC4,ZNF518A,DLX1,ATOH1,HAND1,OLIG3,FEZF1,TBR1,HOXC4,GFI1,SHOX2,FEV,MAFB,FOXL2,SOX8,HOXC11,NR2E1,PAX6,OTX1,DMRT2,BNC1,HIC1,BRF1,ONECUT2,EVX2,TBX18,ZIC5,SIX1,KLF14,TP73,SOX21,LHX4,ALX1,TCF7,DMRTA2,PAX3,GATA5,SIM1,EMX1,MYEF2,SALL3,TBX20,MYBL2
query_1	GO:0003676	nucleic acid binding	3657	59	GO:MF	3.3e-12	EVX1,HIF1A,ALX3,SATB2,PITX2,NKX2-4,ZIC1,EXOSC2,ZIC2,BSX,INSM1,TBX15,ESRRG,FOXG1,ZIC4,ZNF518A,DLX1,ATOH1,HAND1,OLIG3,FEZF1,TBR1,HOXC4,GFI1,SHOX2,FEV,MAFB,FOXL2,SOX8,HOXC11,NR2E1,PAX6,OTX1,DMRT2,BNC1,HIC1,BRF1,ONECUT2,EVX2,TBX18,ZIC5,HMG20B,DHX40,SIX1,KLF14,TP73,SOX21,LHX4,ALX1,TCF7,DMRTA2,PAX3,GATA5,SIM1,EMX1,MYEF2,SALL3,TBX20,MYBL2
query_1	GO:0048598	embryonic morphogenesis	574	25	GO:BP	3.75e-12	HIF1A,ALX3,SATB2,ZIC1,TBX15,FOXG1,ATOH1,HAND1,TBR1,MYO3A,HOXC4,SHOX2,MAFB,FOXL2,SOX8,HOXC11,PAX6,OTX1,TBX18,WNT2B,SIX1,ALX1,MMP9,TCF7,TBX20
query_1	GO:0048568	embryonic organ development	423	22	GO:BP	4.45e-12	HIF1A,ALX3,SATB2,ZIC1,TBX15,FOXG1,ATOH1,HAND1,TBR1,MYO3A,HOXC4,SHOX2,MAFB,FOXL2,HOXC11,PAX6,OTX1,SIX1,ALX1,TCF7,TUBB2B,TBX20
query_1	GO:0003002	regionalization	334	20	GO:BP	5.12e-12	EVX1,PITX2,FOXG1,DLX1,FEZF1,TBR1,HOXC4,MAFB,HOXC11,PAX6,OTX1,DMRT2,TBX18,WNT2B,SIX1,ALX1,DMRTA2,GATA5,EMX1,TBX20
query_1	GO:0051254	positive regulation of RNA metabolic process	1573	39	GO:BP	5.58e-12	EVX1,HIF1A,SATB2,PITX2,NKX2-4,ZIC1,ZIC2,BSX,TBX15,ESRRG,DLX1,ATOH1,HAND1,FEZF1,TBR1,HOXC4,GFI1,MAFB,FOXL2,SOX8,HOXC11,NR2E1,PAX6,OTX1,DMRT2,BRF1,ONECUT2,TBX18,SIX1,KLF14,TP73,SOX21,LHX4,ALX1,PAX3,GATA5,SIM1,TBX20,MYBL2
query_1	GO:2000112	regulation of cellular macromolecule biosynthetic process	3468	58	GO:BP	6.91e-12	EVX1,HIF1A,TRAPPC9,ALX3,SATB2,PITX2,NKX2-4,ZIC1,ZIC2,BSX,INSM1,TBX15,ESRRG,FOXG1,ZIC4,ZNF518A,DLX1,ATOH1,HAND1,OLIG3,FEZF1,TBR1,HOXC4,GFI1,SHOX2,FEV,MAFB,FOXL2,SOX8,HOXC11,NR2E1,PAX6,OTX1,DMRT2,BNC1,HIC1,BRF1,ONECUT2,EVX2,TBX18,ZIC5,SIX1,KLF14,TP73,SOX21,LHX4,ALX1,TCF7,DMRTA2,PAX3,GATA5,SIM1,EMX1,NECAB1,MYEF2,SALL3,TBX20,MYBL2
query_1	GO:0019219	regulation of nucleobase-containing compound metabolic process	3517	58	GO:BP	1.16e-11	EVX1,HIF1A,TRAPPC9,ALX3,SATB2,PITX2,NKX2-4,ZIC1,EXOSC2,ZIC2,BSX,INSM1,TBX15,ESRRG,FOXG1,ZIC4,ZNF518A,DLX1,ATOH1,HAND1,OLIG3,FEZF1,TBR1,HOXC4,GFI1,SHOX2,FEV,MAFB,FOXL2,SOX8,HOXC11,NR2E1,PAX6,OTX1,DMRT2,BNC1,HIC1,BRF1,ONECUT2,EVX2,TBX18,ZIC5,SIX1,KLF14,TP73,SOX21,LHX4,ALX1,TCF7,DMRTA2,PAX3,GATA5,SIM1,EMX1,MYEF2,SALL3,TBX20,MYBL2
query_1	GO:0048513	animal organ development	3289	56	GO:BP	1.16e-11	EVX1,HIF1A,TRAPPC9,ALX3,SATB2,PITX2,ZIC1,DSC3,ZIC2,BSX,INSM1,TBX15,FOXG1,SYNGR3,DLX1,ATOH1,HAND1,SLC26A5,OLIG3,FEZF1,TBR1,MYO3A,HOXC4,GFI1,SHOX2,MAFB,FOXL2,SOX8,HOXC11,NR2E1,PAX6,OTX1,PARVA,ONECUT2,TBX18,HMG20B,WNT2B,SIX1,TP73,SOX21,TUFT1,LHX4,ALX1,MMP9,TCF7,DMRTA2,PAX3,GATA5,SIM1,CNTNAP2,EMX1,TRIM45,JPH1,TUBB2B,SALL3,TBX20
query_1	GO:0034654	nucleobase-containing compound biosynthetic process	3627	59	GO:BP	1.16e-11	EVX1,HIF1A,TRAPPC9,ALX3,SATB2,CDS1,PITX2,NKX2-4,ZIC1,ZIC2,BSX,INSM1,TBX15,ESRRG,FOXG1,ZIC4,ZNF518A,DLX1,ATOH1,HAND1,OLIG3,FEZF1,TBR1,HOXC4,GFI1,SHOX2,FEV,MAFB,FOXL2,SOX8,HOXC11,NR2E1,PAX6,OTX1,DMRT2,BNC1,HIC1,BRF1,ONECUT2,EVX2,TBX18,ZIC5,SIX1,KLF14,TP73,ELOVL2,SOX21,LHX4,ALX1,TCF7,DMRTA2,PAX3,GATA5,SIM1,EMX1,MYEF2,SALL3,TBX20,MYBL2
query_1	GO:0007417	central nervous system development	937	30	GO:BP	1.46e-11	EVX1,HIF1A,TRAPPC9,SATB2,PITX2,ZIC1,ZIC2,FOXG1,ZIC4,SYNGR3,DLX1,ATOH1,OLIG3,FEZF1,TBR1,MAFB,SOX8,NR2E1,PAX6,OTX1,ZIC5,WNT2B,SIX1,TP73,LHX4,DMRTA2,CNTNAP2,EMX1,SALL3,TBX20
query_1	GO:0007399	nervous system development	2174	45	GO:BP	1.48e-11	SDCCAG8,EVX1,HIF1A,TRAPPC9,SATB2,PITX2,ZIC1,ZIC2,INSM1,FOXG1,ZIC4,SYNGR3,DLX1,ATOH1,OLIG3,FEZF1,TBR1,GFI1,SHOX2,FEV,MAFB,SOX8,NR2E1,OPRM1,PAX6,OTX1,ONECUT2,ZIC5,HMG20B,WNT2B,SIX1,TP73,LHX4,ALX1,TCF7,DMRTA2,PAX3,PCDHB15,SIM1,CNTNAP2,EMX1,MYEF2,TUBB2B,SALL3,TBX20
query_1	GO:0007275	multicellular organism development	4920	69	GO:BP	1.62e-11	SDCCAG8,EVX1,HIF1A,TRAPPC9,ALX3,SATB2,PITX2,NKX2-4,ZIC1,DSC3,ZIC2,BSX,INSM1,TBX15,FOXG1,ZIC4,SYNGR3,DLX1,ATOH1,HAND1,SLC26A5,OLIG3,FEZF1,TBR1,MYO3A,HOXC4,GFI1,SHOX2,FEV,MAFB,FOXL2,SOX8,HOXC11,NR2E1,OPRM1,PAX6,OTX1,DMRT2,CDK20,PARVA,HIC1,ONECUT2,EVX2,TBX18,ZIC5,HMG20B,WNT2B,SIX1,TP73,SOX21,TUFT1,LHX4,ALX1,MMP9,TCF7,DMRTA2,PAX3,GATA5,PCDHB15,SIM1,CNTNAP2,EMX1,NECAB1,TRIM45,JPH1,MYEF2,TUBB2B,SALL3,T…
query_1	GO:0018130	heterocycle biosynthetic process	3682	59	GO:BP	1.86e-11	EVX1,HIF1A,TRAPPC9,ALX3,SATB2,CDS1,PITX2,NKX2-4,ZIC1,ZIC2,BSX,INSM1,TBX15,ESRRG,FOXG1,ZIC4,ZNF518A,DLX1,ATOH1,HAND1,OLIG3,FEZF1,TBR1,HOXC4,GFI1,SHOX2,FEV,MAFB,FOXL2,SOX8,HOXC11,NR2E1,PAX6,OTX1,DMRT2,BNC1,HIC1,BRF1,ONECUT2,EVX2,TBX18,ZIC5,SIX1,KLF14,TP73,ELOVL2,SOX21,LHX4,ALX1,TCF7,DMRTA2,PAX3,GATA5,SIM1,EMX1,MYEF2,SALL3,TBX20,MYBL2
query_1	GO:0019438	aromatic compound biosynthetic process	3693	59	GO:BP	2.06e-11	EVX1,HIF1A,TRAPPC9,ALX3,SATB2,CDS1,PITX2,NKX2-4,ZIC1,ZIC2,BSX,INSM1,TBX15,ESRRG,FOXG1,ZIC4,ZNF518A,DLX1,ATOH1,HAND1,OLIG3,FEZF1,TBR1,HOXC4,GFI1,SHOX2,FEV,MAFB,FOXL2,SOX8,HOXC11,NR2E1,PAX6,OTX1,DMRT2,BNC1,HIC1,BRF1,ONECUT2,EVX2,TBX18,ZIC5,SIX1,KLF14,TP73,ELOVL2,SOX21,LHX4,ALX1,TCF7,DMRTA2,PAX3,GATA5,SIM1,EMX1,MYEF2,SALL3,TBX20,MYBL2
query_1	GO:0010556	regulation of macromolecule biosynthetic process	3581	58	GO:BP	2.12e-11	EVX1,HIF1A,TRAPPC9,ALX3,SATB2,PITX2,NKX2-4,ZIC1,ZIC2,BSX,INSM1,TBX15,ESRRG,FOXG1,ZIC4,ZNF518A,DLX1,ATOH1,HAND1,OLIG3,FEZF1,TBR1,HOXC4,GFI1,SHOX2,FEV,MAFB,FOXL2,SOX8,HOXC11,NR2E1,PAX6,OTX1,DMRT2,BNC1,HIC1,BRF1,ONECUT2,EVX2,TBX18,ZIC5,SIX1,KLF14,TP73,SOX21,LHX4,ALX1,TCF7,DMRTA2,PAX3,GATA5,SIM1,EMX1,NECAB1,MYEF2,SALL3,TBX20,MYBL2
query_1	GO:1901362	organic cyclic compound biosynthetic process	3827	60	GO:BP	2.35e-11	EVX1,HIF1A,TRAPPC9,ALX3,SATB2,CDS1,PITX2,NKX2-4,ZIC1,ZIC2,BSX,INSM1,TBX15,ESRRG,FOXG1,ZIC4,ZNF518A,DLX1,ATOH1,HAND1,OLIG3,FEZF1,TBR1,HOXC4,GFI1,SHOX2,FEV,MAFB,FOXL2,SOX8,HOXC11,NR2E1,PAX6,OTX1,DMRT2,BNC1,HIC1,BRF1,ONECUT2,EVX2,TBX18,ZIC5,SIX1,KLF14,TP73,ELOVL2,SOX21,LHX4,ALX1,TCF7,DMRTA2,PAX3,GATA5,SIM1,EMX1,MYEF2,SALL3,SQLE,TBX20,MYBL2
query_1	GO:0048663	neuron fate commitment	68	11	GO:BP	4.66e-11	EVX1,SATB2,FOXG1,DLX1,ATOH1,OLIG3,TBR1,FEV,PAX6,SIX1,DMRTA2
query_1	GO:0045935	positive regulation of nucleobase-containing compound metabolic process	1708	39	GO:BP	4.94e-11	EVX1,HIF1A,SATB2,PITX2,NKX2-4,ZIC1,ZIC2,BSX,TBX15,ESRRG,DLX1,ATOH1,HAND1,FEZF1,TBR1,HOXC4,GFI1,MAFB,FOXL2,SOX8,HOXC11,NR2E1,PAX6,OTX1,DMRT2,BRF1,ONECUT2,TBX18,SIX1,KLF14,TP73,SOX21,LHX4,ALX1,PAX3,GATA5,SIM1,TBX20,MYBL2
query_1	GO:0009889	regulation of biosynthetic process	3784	59	GO:BP	5.39e-11	EVX1,HIF1A,TRAPPC9,ALX3,SATB2,PITX2,NKX2-4,ZIC1,ZIC2,BSX,INSM1,TBX15,ESRRG,FOXG1,ZIC4,ZNF518A,DLX1,ATOH1,HAND1,OLIG3,FEZF1,TBR1,HOXC4,GFI1,SHOX2,FEV,MAFB,FOXL2,SOX8,HOXC11,NR2E1,PAX6,OTX1,DMRT2,BNC1,HIC1,BRF1,ONECUT2,EVX2,TBX18,ZIC5,SIX1,KLF14,TP73,SOX21,LHX4,ALX1,TCF7,DMRTA2,PAX3,GATA5,SIM1,EMX1,NECAB1,MYEF2,SALL3,SQLE,TBX20,MYBL2
query_1	GO:0048856	anatomical structure development	5332	71	GO:BP	5.52e-11	SDCCAG8,EVX1,HIF1A,TRAPPC9,ALX3,SATB2,PITX2,NKX2-4,ZIC1,DSC3,ZIC2,BSX,INSM1,TBX15,FOXG1,ZIC4,SYNGR3,DLX1,ATOH1,HAND1,SLC26A5,OLIG3,FEZF1,TBR1,MYO3A,HOXC4,GFI1,SHOX2,FEV,MAFB,FOXL2,SOX8,HOXC11,NR2E1,OPRM1,PAX6,OTX1,DMRT2,CDK20,BNC1,PARVA,HIC1,ONECUT2,EVX2,TBX18,ZIC5,HMG20B,WNT2B,SIX1,TP73,SOX21,TUFT1,LHX4,ALX1,MMP9,TCF7,DMRTA2,PAX3,GATA5,PCDHB15,SIM1,IGFBP1,CNTNAP2,EMX1,NECAB1,TRIM45,JPH1,MYEF2,TU…
query_1	GO:0010557	positive regulation of macromolecule biosynthetic process	1726	39	GO:BP	6.35e-11	EVX1,HIF1A,SATB2,PITX2,NKX2-4,ZIC1,ZIC2,BSX,TBX15,ESRRG,DLX1,ATOH1,HAND1,FEZF1,TBR1,HOXC4,GFI1,MAFB,FOXL2,SOX8,HOXC11,NR2E1,PAX6,OTX1,DMRT2,BRF1,ONECUT2,TBX18,SIX1,KLF14,TP73,SOX21,LHX4,ALX1,PAX3,GATA5,SIM1,TBX20,MYBL2
query_1	GO:0048731	system development	4424	64	GO:BP	6.61e-11	SDCCAG8,EVX1,HIF1A,TRAPPC9,ALX3,SATB2,PITX2,ZIC1,DSC3,ZIC2,BSX,INSM1,TBX15,FOXG1,ZIC4,SYNGR3,DLX1,ATOH1,HAND1,SLC26A5,OLIG3,FEZF1,TBR1,MYO3A,HOXC4,GFI1,SHOX2,FEV,MAFB,FOXL2,SOX8,HOXC11,NR2E1,OPRM1,PAX6,OTX1,DMRT2,PARVA,ONECUT2,TBX18,ZIC5,HMG20B,WNT2B,SIX1,TP73,SOX21,TUFT1,LHX4,ALX1,MMP9,TCF7,DMRTA2,PAX3,GATA5,PCDHB15,SIM1,CNTNAP2,EMX1,TRIM45,JPH1,MYEF2,TUBB2B,SALL3,TBX20
query_1	GO:0031326	regulation of cellular biosynthetic process	3709	58	GO:BP	8.17e-11	EVX1,HIF1A,TRAPPC9,ALX3,SATB2,PITX2,NKX2-4,ZIC1,ZIC2,BSX,INSM1,TBX15,ESRRG,FOXG1,ZIC4,ZNF518A,DLX1,ATOH1,HAND1,OLIG3,FEZF1,TBR1,HOXC4,GFI1,SHOX2,FEV,MAFB,FOXL2,SOX8,HOXC11,NR2E1,PAX6,OTX1,DMRT2,BNC1,HIC1,BRF1,ONECUT2,EVX2,TBX18,ZIC5,SIX1,KLF14,TP73,SOX21,LHX4,ALX1,TCF7,DMRTA2,PAX3,GATA5,SIM1,EMX1,NECAB1,MYEF2,SALL3,TBX20,MYBL2
query_1	GO:0010628	positive regulation of gene expression	1835	40	GO:BP	8.4e-11	EVX1,HIF1A,SATB2,PITX2,NKX2-4,ZIC1,ZIC2,BSX,TBX15,ESRRG,DLX1,ATOH1,HAND1,FEZF1,TBR1,HOXC4,GFI1,FEV,MAFB,FOXL2,SOX8,HOXC11,NR2E1,PAX6,OTX1,DMRT2,BRF1,ONECUT2,TBX18,SIX1,KLF14,TP73,SOX21,LHX4,ALX1,PAX3,GATA5,SIM1,TBX20,MYBL2
query_1	GO:0031328	positive regulation of cellular biosynthetic process	1810	39	GO:BP	2.56e-10	EVX1,HIF1A,SATB2,PITX2,NKX2-4,ZIC1,ZIC2,BSX,TBX15,ESRRG,DLX1,ATOH1,HAND1,FEZF1,TBR1,HOXC4,GFI1,MAFB,FOXL2,SOX8,HOXC11,NR2E1,PAX6,OTX1,DMRT2,BRF1,ONECUT2,TBX18,SIX1,KLF14,TP73,SOX21,LHX4,ALX1,PAX3,GATA5,SIM1,TBX20,MYBL2
query_1	GO:0009891	positive regulation of biosynthetic process	1837	39	GO:BP	3.96e-10	EVX1,HIF1A,SATB2,PITX2,NKX2-4,ZIC1,ZIC2,BSX,TBX15,ESRRG,DLX1,ATOH1,HAND1,FEZF1,TBR1,HOXC4,GFI1,MAFB,FOXL2,SOX8,HOXC11,NR2E1,PAX6,OTX1,DMRT2,BRF1,ONECUT2,TBX18,SIX1,KLF14,TP73,SOX21,LHX4,ALX1,PAX3,GATA5,SIM1,TBX20,MYBL2
query_1	GO:0032502	developmental process	5734	72	GO:BP	5.85e-10	SDCCAG8,EVX1,HIF1A,TRAPPC9,ALX3,SATB2,PITX2,NKX2-4,ZIC1,DSC3,ZIC2,BSX,INSM1,TBX15,FOXG1,ZIC4,SYNGR3,DLX1,ATOH1,HAND1,SLC26A5,OLIG3,FEZF1,TBR1,MYO3A,HOXC4,GFI1,SHOX2,FEV,MAFB,FOXL2,SOX8,HOXC11,NR2E1,OPRM1,PAX6,OTX1,DMRT2,CDK20,BNC1,PARVA,HIC1,ONECUT2,EVX2,TBX18,ZIC5,HMG20B,WNT2B,SIX1,TP73,SOX21,TUFT1,LHX4,ALX1,MMP9,TCF7,DMRTA2,PAX3,GATA5,PCDHB15,SIM1,IGFBP1,CNTNAP2,EMX1,NECAB1,TRIM45,JPH1,MYEF2,PC…
query_1	GO:0016070	RNA metabolic process	4011	59	GO:BP	5.85e-10	EVX1,HIF1A,TRAPPC9,ALX3,SATB2,PITX2,NKX2-4,ZIC1,EXOSC2,ZIC2,BSX,INSM1,TBX15,ESRRG,FOXG1,ZIC4,ZNF518A,DLX1,ATOH1,HAND1,OLIG3,FEZF1,TBR1,HOXC4,GFI1,SHOX2,FEV,MAFB,FOXL2,SOX8,HOXC11,NR2E1,PAX6,OTX1,DMRT2,BNC1,HIC1,BRF1,ONECUT2,EVX2,TBX18,ZIC5,DHX40,SIX1,KLF14,TP73,SOX21,LHX4,ALX1,TCF7,DMRTA2,PAX3,GATA5,SIM1,EMX1,MYEF2,SALL3,TBX20,MYBL2
query_1	GO:0001708	cell fate specification	97	11	GO:BP	1.87e-09	EVX1,TBX15,ATOH1,OLIG3,TBR1,FEV,PAX6,TBX18,SIX1,DMRTA2,TBX20
query_1	GO:0009653	anatomical structure morphogenesis	2529	45	GO:BP	1.87e-09	SDCCAG8,HIF1A,ALX3,SATB2,PITX2,ZIC1,BSX,TBX15,FOXG1,DLX1,ATOH1,HAND1,SLC26A5,FEZF1,TBR1,MYO3A,HOXC4,SHOX2,MAFB,FOXL2,SOX8,HOXC11,NR2E1,PAX6,OTX1,DMRT2,PARVA,ONECUT2,EVX2,TBX18,WNT2B,SIX1,SOX21,TUFT1,LHX4,ALX1,MMP9,TCF7,PAX3,GATA5,CNTNAP2,EMX1,TUBB2B,SALL3,TBX20
query_1	GO:0010468	regulation of gene expression	4017	58	GO:BP	2.21e-09	EVX1,HIF1A,TRAPPC9,ALX3,SATB2,PITX2,NKX2-4,ZIC1,EXOSC2,ZIC2,BSX,INSM1,TBX15,ESRRG,FOXG1,ZIC4,ZNF518A,DLX1,ATOH1,HAND1,OLIG3,FEZF1,TBR1,HOXC4,GFI1,SHOX2,FEV,MAFB,FOXL2,SOX8,HOXC11,NR2E1,PAX6,OTX1,DMRT2,BNC1,HIC1,BRF1,ONECUT2,EVX2,TBX18,ZIC5,SIX1,KLF14,TP73,SOX21,LHX4,ALX1,TCF7,DMRTA2,PAX3,GATA5,SIM1,EMX1,MYEF2,SALL3,TBX20,MYBL2
query_1	GO:0048699	generation of neurons	1414	33	GO:BP	2.21e-09	SDCCAG8,EVX1,HIF1A,TRAPPC9,SATB2,PITX2,INSM1,FOXG1,DLX1,ATOH1,OLIG3,FEZF1,TBR1,GFI1,SHOX2,FEV,SOX8,NR2E1,OPRM1,PAX6,ONECUT2,HMG20B,WNT2B,SIX1,TP73,LHX4,DMRTA2,CNTNAP2,EMX1,MYEF2,TUBB2B,SALL3,TBX20
query_1	GO:0030182	neuron differentiation	1263	31	GO:BP	2.88e-09	EVX1,HIF1A,TRAPPC9,SATB2,PITX2,INSM1,FOXG1,DLX1,ATOH1,OLIG3,FEZF1,TBR1,GFI1,SHOX2,FEV,SOX8,NR2E1,PAX6,ONECUT2,HMG20B,WNT2B,SIX1,TP73,LHX4,DMRTA2,CNTNAP2,EMX1,MYEF2,TUBB2B,SALL3,TBX20
query_1	GO:0032501	multicellular organismal process	6747	77	GO:BP	5.57e-09	SDCCAG8,EVX1,HIF1A,TRAPPC9,ALX3,SATB2,PITX2,NKX2-4,ZIC1,DSC3,ZIC2,BSX,INSM1,TBX15,ESRRG,FOXG1,ZIC4,SYNGR3,DLX1,ATOH1,HAND1,SLC26A5,OLIG3,FEZF1,TBR1,MYO3A,HOXC4,GFI1,SHOX2,FEV,MAFB,FOXL2,SOX8,HOXC11,NR2E1,OPRM1,PAX6,OTX1,DMRT2,GJD2,CDK20,BNC1,PARVA,HIC1,ONECUT2,EVX2,TBX18,ZIC5,HMG20B,WNT2B,SIX1,TP73,GLRA1,SOX21,TUFT1,LHX4,ALX1,CACNA2D1,MMP9,TCF7,DMRTA2,PAX3,GATA5,PCDHB15,SIM1,CNTNAP2,EMX1,NECAB1,R…
query_1	GO:0044271	cellular nitrogen compound biosynthetic process	4278	59	GO:BP	8.37e-09	EVX1,HIF1A,TRAPPC9,ALX3,SATB2,CDS1,PITX2,NKX2-4,ZIC1,ZIC2,BSX,INSM1,TBX15,ESRRG,FOXG1,ZIC4,ZNF518A,DLX1,ATOH1,HAND1,OLIG3,FEZF1,TBR1,HOXC4,GFI1,SHOX2,FEV,MAFB,FOXL2,SOX8,HOXC11,NR2E1,PAX6,OTX1,DMRT2,BNC1,HIC1,BRF1,ONECUT2,EVX2,TBX18,ZIC5,SIX1,KLF14,TP73,ELOVL2,SOX21,LHX4,ALX1,TCF7,DMRTA2,PAX3,GATA5,SIM1,EMX1,MYEF2,SALL3,TBX20,MYBL2
query_1	GO:0022008	neurogenesis	1512	33	GO:BP	1.2e-08	SDCCAG8,EVX1,HIF1A,TRAPPC9,SATB2,PITX2,INSM1,FOXG1,DLX1,ATOH1,OLIG3,FEZF1,TBR1,GFI1,SHOX2,FEV,SOX8,NR2E1,OPRM1,PAX6,ONECUT2,HMG20B,WNT2B,SIX1,TP73,LHX4,DMRTA2,CNTNAP2,EMX1,MYEF2,TUBB2B,SALL3,TBX20
query_1	GO:0030900	forebrain development	370	17	GO:BP	1.25e-08	HIF1A,TRAPPC9,SATB2,PITX2,FOXG1,DLX1,ATOH1,FEZF1,TBR1,NR2E1,PAX6,OTX1,WNT2B,DMRTA2,CNTNAP2,EMX1,SALL3
query_1	GO:0031981	nuclear lumen	4092	57	GO:CC	1.64e-08	EVX1,HIF1A,ALX3,SATB2,PITX2,NKX2-4,ZIC1,EXOSC2,ZIC2,BSX,INSM1,TBX15,ESRRG,FOXG1,DLX1,ATOH1,HAND1,OLIG3,FEZF1,HOXC4,GFI1,SHOX2,FEV,MAFB,FOXL2,SOX8,HOXC11,NR2E1,PAX6,OTX1,DMRT2,CDK20,BNC1,HIC1,BRF1,ONECUT2,EVX2,TBX18,HMG20B,SIX1,KLF14,TP73,SOX21,LHX4,ALX1,TCF7,DMRTA2,PAX3,GATA5,SIM1,EMX1,NECAB1,RNF216,TRIM45,JPH1,TBX20,MYBL2
query_1	GO:0090304	nucleic acid metabolic process	4404	59	GO:BP	2.72e-08	EVX1,HIF1A,TRAPPC9,ALX3,SATB2,PITX2,NKX2-4,ZIC1,EXOSC2,ZIC2,BSX,INSM1,TBX15,ESRRG,FOXG1,ZIC4,ZNF518A,DLX1,ATOH1,HAND1,OLIG3,FEZF1,TBR1,HOXC4,GFI1,SHOX2,FEV,MAFB,FOXL2,SOX8,HOXC11,NR2E1,PAX6,OTX1,DMRT2,BNC1,HIC1,BRF1,ONECUT2,EVX2,TBX18,ZIC5,DHX40,SIX1,KLF14,TP73,SOX21,LHX4,ALX1,TCF7,DMRTA2,PAX3,GATA5,SIM1,EMX1,MYEF2,SALL3,TBX20,MYBL2
query_1	GO:0034645	cellular macromolecule biosynthetic process	4300	58	GO:BP	3.34e-08	EVX1,HIF1A,TRAPPC9,ALX3,SATB2,PITX2,NKX2-4,ZIC1,ZIC2,BSX,INSM1,TBX15,ESRRG,FOXG1,ZIC4,ZNF518A,DLX1,ATOH1,HAND1,OLIG3,FEZF1,TBR1,HOXC4,GFI1,SHOX2,FEV,MAFB,FOXL2,SOX8,HOXC11,NR2E1,PAX6,OTX1,DMRT2,BNC1,HIC1,BRF1,ONECUT2,EVX2,TBX18,ZIC5,SIX1,KLF14,TP73,SOX21,LHX4,ALX1,TCF7,DMRTA2,PAX3,GATA5,SIM1,EMX1,NECAB1,MYEF2,SALL3,TBX20,MYBL2
query_1	GO:0051171	regulation of nitrogen compound metabolic process	5124	64	GO:BP	4.59e-08	EVX1,HIF1A,TRAPPC9,ALX3,SATB2,PITX2,NKX2-4,ZIC1,EXOSC2,ZIC2,BSX,INSM1,TBX15,ESRRG,FOXG1,ZIC4,HSPBP1,ZNF518A,DLX1,ATOH1,HAND1,OLIG3,FEZF1,TBR1,PPP1R14A,HOXC4,GFI1,SHOX2,FEV,MAFB,FOXL2,SOX8,HOXC11,NR2E1,OPRM1,PAX6,OTX1,DMRT2,BNC1,HIC1,BRF1,ONECUT2,EVX2,TBX18,ZIC5,HMG20B,SIX1,KLF14,TP73,SOX21,LHX4,ALX1,MMP9,TCF7,DMRTA2,PAX3,GATA5,SIM1,EMX1,NECAB1,MYEF2,SALL3,TBX20,MYBL2
query_1	GO:0080090	regulation of primary metabolic process	5277	65	GO:BP	5.21e-08	EVX1,HIF1A,TRAPPC9,ALX3,SATB2,PITX2,NKX2-4,ZIC1,EXOSC2,ZIC2,BSX,INSM1,TBX15,ESRRG,FOXG1,ZIC4,HSPBP1,ZNF518A,DLX1,ATOH1,HAND1,OLIG3,FEZF1,TBR1,PPP1R14A,HOXC4,GFI1,SHOX2,FEV,MAFB,FOXL2,SOX8,HOXC11,NR2E1,OPRM1,PAX6,OTX1,DMRT2,BNC1,HIC1,BRF1,ONECUT2,EVX2,TBX18,ZIC5,HMG20B,SIX1,KLF14,TP73,SOX21,LHX4,ALX1,MMP9,TCF7,DMRTA2,PAX3,GATA5,SIM1,EMX1,NECAB1,MYEF2,SALL3,SQLE,TBX20,MYBL2
query_1	GO:1901363	heterocyclic compound binding	5375	65	GO:MF	5.35e-08	EVX1,HIF1A,ALX3,SATB2,PITX2,NKX2-4,ZIC1,EXOSC2,ZIC2,BSX,INSM1,TBX15,ESRRG,FOXG1,ZIC4,HSPBP1,GAD2,ZNF518A,DLX1,ATOH1,HAND1,OLIG3,FEZF1,TBR1,MYO3A,HOXC4,GFI1,SHOX2,FEV,MAFB,FOXL2,SOX8,HOXC11,NR2E1,PAX6,OTX1,DMRT2,CDK20,BNC1,HIC1,BRF1,ONECUT2,EVX2,TBX18,ZIC5,HMG20B,DHX40,SIX1,KLF14,TP73,SOX21,LHX4,ALX1,TCF7,DMRTA2,PAX3,GATA5,SIM1,EMX1,MYEF2,TUBB2B,SALL3,SQLE,TBX20,MYBL2
query_1	GO:0006725	cellular aromatic compound metabolic process	5038	63	GO:BP	6.85e-08	EVX1,HIF1A,TRAPPC9,ALX3,SATB2,CDS1,PITX2,NKX2-4,ZIC1,EXOSC2,ZIC2,BSX,INSM1,TBX15,ESRRG,FOXG1,ZIC4,ZNF518A,DLX1,ATOH1,HAND1,OLIG3,FEZF1,TBR1,HOXC4,GFI1,SHOX2,FEV,MAFB,FOXL2,SOX8,HOXC11,NR2E1,PAX6,IL4I1,OTX1,DMRT2,BNC1,HIC1,BRF1,ONECUT2,EVX2,TBX18,ZIC5,DHX40,SIX1,KLF14,TP73,ELOVL2,SOX21,LHX4,ALX1,TCF7,DMRTA2,PAX3,GATA5,SIM1,EMX1,MYEF2,SALL3,SQLE,TBX20,MYBL2
query_1	GO:0097159	organic cyclic compound binding	5453	65	GO:MF	9.74e-08	EVX1,HIF1A,ALX3,SATB2,PITX2,NKX2-4,ZIC1,EXOSC2,ZIC2,BSX,INSM1,TBX15,ESRRG,FOXG1,ZIC4,HSPBP1,GAD2,ZNF518A,DLX1,ATOH1,HAND1,OLIG3,FEZF1,TBR1,MYO3A,HOXC4,GFI1,SHOX2,FEV,MAFB,FOXL2,SOX8,HOXC11,NR2E1,PAX6,OTX1,DMRT2,CDK20,BNC1,HIC1,BRF1,ONECUT2,EVX2,TBX18,ZIC5,HMG20B,DHX40,SIX1,KLF14,TP73,SOX21,LHX4,ALX1,TCF7,DMRTA2,PAX3,GATA5,SIM1,EMX1,MYEF2,TUBB2B,SALL3,SQLE,TBX20,MYBL2
query_1	GO:0048665	neuron fate specification	35	7	GO:BP	1.04e-07	EVX1,ATOH1,OLIG3,FEV,PAX6,SIX1,DMRTA2
query_1	GO:0009059	macromolecule biosynthetic process	4432	58	GO:BP	1.06e-07	EVX1,HIF1A,TRAPPC9,ALX3,SATB2,PITX2,NKX2-4,ZIC1,ZIC2,BSX,INSM1,TBX15,ESRRG,FOXG1,ZIC4,ZNF518A,DLX1,ATOH1,HAND1,OLIG3,FEZF1,TBR1,HOXC4,GFI1,SHOX2,FEV,MAFB,FOXL2,SOX8,HOXC11,NR2E1,PAX6,OTX1,DMRT2,BNC1,HIC1,BRF1,ONECUT2,EVX2,TBX18,ZIC5,SIX1,KLF14,TP73,SOX21,LHX4,ALX1,TCF7,DMRTA2,PAX3,GATA5,SIM1,EMX1,NECAB1,MYEF2,SALL3,TBX20,MYBL2
query_1	GO:0007420	brain development	683	21	GO:BP	1.09e-07	HIF1A,TRAPPC9,SATB2,PITX2,ZIC1,ZIC2,FOXG1,SYNGR3,DLX1,ATOH1,FEZF1,TBR1,MAFB,NR2E1,PAX6,OTX1,WNT2B,DMRTA2,CNTNAP2,EMX1,SALL3
query_1	GO:1901360	organic cyclic compound metabolic process	5235	64	GO:BP	1.09e-07	EVX1,HIF1A,TRAPPC9,EPHX3,ALX3,SATB2,CDS1,PITX2,NKX2-4,ZIC1,EXOSC2,ZIC2,BSX,INSM1,TBX15,ESRRG,FOXG1,ZIC4,ZNF518A,DLX1,ATOH1,HAND1,OLIG3,FEZF1,TBR1,HOXC4,GFI1,SHOX2,FEV,MAFB,FOXL2,SOX8,HOXC11,NR2E1,PAX6,IL4I1,OTX1,DMRT2,BNC1,HIC1,BRF1,ONECUT2,EVX2,TBX18,ZIC5,DHX40,SIX1,KLF14,TP73,ELOVL2,SOX21,LHX4,ALX1,TCF7,DMRTA2,PAX3,GATA5,SIM1,EMX1,MYEF2,SALL3,SQLE,TBX20,MYBL2
query_1	GO:0021953	central nervous system neuron differentiation	184	12	GO:BP	1.11e-07	EVX1,SATB2,FOXG1,DLX1,OLIG3,TBR1,NR2E1,PAX6,LHX4,EMX1,SALL3,TBX20
query_1	GO:0006139	nucleobase-containing compound metabolic process	4845	61	GO:BP	1.16e-07	EVX1,HIF1A,TRAPPC9,ALX3,SATB2,CDS1,PITX2,NKX2-4,ZIC1,EXOSC2,ZIC2,BSX,INSM1,TBX15,ESRRG,FOXG1,ZIC4,ZNF518A,DLX1,ATOH1,HAND1,OLIG3,FEZF1,TBR1,HOXC4,GFI1,SHOX2,FEV,MAFB,FOXL2,SOX8,HOXC11,NR2E1,PAX6,OTX1,DMRT2,BNC1,HIC1,BRF1,ONECUT2,EVX2,TBX18,ZIC5,DHX40,SIX1,KLF14,TP73,ELOVL2,SOX21,LHX4,ALX1,TCF7,DMRTA2,PAX3,GATA5,SIM1,EMX1,MYEF2,SALL3,TBX20,MYBL2
query_1	GO:0021987	cerebral cortex development	112	10	GO:BP	1.16e-07	HIF1A,TRAPPC9,FOXG1,ATOH1,TBR1,NR2E1,PAX6,DMRTA2,CNTNAP2,EMX1
query_1	GO:0009792	embryo development ending in birth or egg hatching	621	20	GO:BP	1.16e-07	EVX1,HIF1A,ALX3,SATB2,DSC3,TBX15,DLX1,HAND1,HOXC4,SHOX2,SOX8,HOXC11,PAX6,DMRT2,TBX18,SIX1,ALX1,TCF7,EMX1,NECAB1
query_1	GO:0046483	heterocycle metabolic process	4994	62	GO:BP	1.31e-07	EVX1,HIF1A,TRAPPC9,EPHX3,ALX3,SATB2,CDS1,PITX2,NKX2-4,ZIC1,EXOSC2,ZIC2,BSX,INSM1,TBX15,ESRRG,FOXG1,ZIC4,ZNF518A,DLX1,ATOH1,HAND1,OLIG3,FEZF1,TBR1,HOXC4,GFI1,SHOX2,FEV,MAFB,FOXL2,SOX8,HOXC11,NR2E1,PAX6,OTX1,DMRT2,BNC1,HIC1,BRF1,ONECUT2,EVX2,TBX18,ZIC5,DHX40,SIX1,KLF14,TP73,ELOVL2,SOX21,LHX4,ALX1,TCF7,DMRTA2,PAX3,GATA5,SIM1,EMX1,MYEF2,SALL3,TBX20,MYBL2
query_1	GO:0043231	intracellular membrane-bounded organelle	9265	89	GO:CC	2.05e-07	EVX1,HIF1A,TRAPPC9,EPHX3,ALX3,SATB2,CDS1,PITX2,NKX2-4,ZIC1,EXOSC2,ZIC2,BSX,INSM1,TBX15,ESRRG,FOXG1,ZIC4,HSPBP1,MT1A,GAD2,ZNF518A,DLX1,ATOH1,HAND1,OLIG3,FEZF1,TBR1,HOXC4,GFI1,SHOX2,FEV,MAFB,FOXL2,SOX8,HOXC11,NR2E1,SLC15A3,RNF175,OPRM1,PAX6,IL4I1,OTX1,DMRT2,CLVS2,CDK20,BNC1,PARVA,HIC1,BRF1,ONECUT2,EVX2,TBX18,ZIC5,GDAP1,HMG20B,WNT2B,NBEA,DHX40,SIX1,KLF14,TP73,ELOVL2,GLRA1,SOX21,P4HA3,LHX4,ALX1,CACNA…
query_1	GO:0048706	embryonic skeletal system development	122	10	GO:BP	2.59e-07	ALX3,SATB2,TBX15,DLX1,HOXC4,SHOX2,HOXC11,DMRT2,SIX1,ALX1
query_1	GO:0021537	telencephalon development	245	13	GO:BP	2.62e-07	HIF1A,TRAPPC9,FOXG1,DLX1,ATOH1,FEZF1,TBR1,NR2E1,PAX6,DMRTA2,CNTNAP2,EMX1,SALL3
query_1	GO:0060322	head development	725	21	GO:BP	2.72e-07	HIF1A,TRAPPC9,SATB2,PITX2,ZIC1,ZIC2,FOXG1,SYNGR3,DLX1,ATOH1,FEZF1,TBR1,MAFB,NR2E1,PAX6,OTX1,WNT2B,DMRTA2,CNTNAP2,EMX1,SALL3
query_1	GO:0090596	sensory organ morphogenesis	253	13	GO:BP	3.74e-07	HIF1A,PITX2,ZIC1,FOXG1,ATOH1,MYO3A,MAFB,FOXL2,SOX8,PAX6,OTX1,WNT2B,SIX1
query_1	GO:0021543	pallium development	167	11	GO:BP	4.19e-07	HIF1A,TRAPPC9,FOXG1,DLX1,ATOH1,TBR1,NR2E1,PAX6,DMRTA2,CNTNAP2,EMX1
query_1	GO:0043009	chordate embryonic development	607	19	GO:BP	4.36e-07	HIF1A,ALX3,SATB2,DSC3,TBX15,DLX1,HAND1,HOXC4,SHOX2,SOX8,HOXC11,PAX6,DMRT2,TBX18,SIX1,ALX1,TCF7,EMX1,NECAB1
query_1	GO:0031323	regulation of cellular metabolic process	5460	64	GO:BP	5.68e-07	EVX1,HIF1A,TRAPPC9,ALX3,SATB2,PITX2,NKX2-4,ZIC1,EXOSC2,ZIC2,BSX,INSM1,TBX15,ESRRG,FOXG1,ZIC4,HSPBP1,ZNF518A,DLX1,ATOH1,HAND1,OLIG3,FEZF1,TBR1,PPP1R14A,HOXC4,GFI1,SHOX2,FEV,MAFB,FOXL2,SOX8,HOXC11,NR2E1,OPRM1,PAX6,OTX1,DMRT2,BNC1,HIC1,BRF1,ONECUT2,EVX2,TBX18,ZIC5,HMG20B,SIX1,KLF14,TP73,SOX21,LHX4,ALX1,MMP9,TCF7,DMRTA2,PAX3,GATA5,SIM1,EMX1,NECAB1,MYEF2,SALL3,TBX20,MYBL2
query_1	GO:0010467	gene expression	4780	59	GO:BP	5.68e-07	EVX1,HIF1A,TRAPPC9,ALX3,SATB2,PITX2,NKX2-4,ZIC1,EXOSC2,ZIC2,BSX,INSM1,TBX15,ESRRG,FOXG1,ZIC4,ZNF518A,DLX1,ATOH1,HAND1,OLIG3,FEZF1,TBR1,HOXC4,GFI1,SHOX2,FEV,MAFB,FOXL2,SOX8,HOXC11,NR2E1,PAX6,OTX1,DMRT2,BNC1,HIC1,BRF1,ONECUT2,EVX2,TBX18,ZIC5,DHX40,SIX1,KLF14,TP73,SOX21,LHX4,ALX1,TCF7,DMRTA2,PAX3,GATA5,SIM1,EMX1,MYEF2,SALL3,TBX20,MYBL2
query_1	GO:0060255	regulation of macromolecule metabolic process	5459	64	GO:BP	5.68e-07	EVX1,HIF1A,TRAPPC9,ALX3,SATB2,PITX2,NKX2-4,ZIC1,EXOSC2,ZIC2,BSX,INSM1,TBX15,ESRRG,FOXG1,ZIC4,HSPBP1,ZNF518A,DLX1,ATOH1,HAND1,OLIG3,FEZF1,TBR1,PPP1R14A,HOXC4,GFI1,SHOX2,FEV,MAFB,FOXL2,SOX8,HOXC11,NR2E1,OPRM1,PAX6,OTX1,DMRT2,BNC1,HIC1,BRF1,ONECUT2,EVX2,TBX18,ZIC5,HMG20B,SIX1,KLF14,TP73,SOX21,LHX4,ALX1,MMP9,TCF7,DMRTA2,PAX3,GATA5,SIM1,EMX1,NECAB1,MYEF2,SALL3,TBX20,MYBL2
query_1	GO:0030154	cell differentiation	3793	51	GO:BP	7.49e-07	SDCCAG8,EVX1,HIF1A,TRAPPC9,SATB2,PITX2,NKX2-4,ZIC1,DSC3,ZIC2,INSM1,TBX15,FOXG1,DLX1,ATOH1,HAND1,OLIG3,FEZF1,TBR1,GFI1,SHOX2,FEV,MAFB,FOXL2,SOX8,NR2E1,OPRM1,PAX6,BNC1,PARVA,ONECUT2,TBX18,ZIC5,HMG20B,WNT2B,SIX1,TP73,SOX21,LHX4,ALX1,MMP9,TCF7,DMRTA2,GATA5,SIM1,CNTNAP2,EMX1,MYEF2,TUBB2B,SALL3,TBX20
query_1	GO:0048869	cellular developmental process	3962	52	GO:BP	1.12e-06	SDCCAG8,EVX1,HIF1A,TRAPPC9,SATB2,PITX2,NKX2-4,ZIC1,DSC3,ZIC2,INSM1,TBX15,FOXG1,DLX1,ATOH1,HAND1,SLC26A5,OLIG3,FEZF1,TBR1,GFI1,SHOX2,FEV,MAFB,FOXL2,SOX8,NR2E1,OPRM1,PAX6,BNC1,PARVA,ONECUT2,TBX18,ZIC5,HMG20B,WNT2B,SIX1,TP73,SOX21,LHX4,ALX1,MMP9,TCF7,DMRTA2,GATA5,SIM1,CNTNAP2,EMX1,MYEF2,TUBB2B,SALL3,TBX20
query_1	GO:0000122	negative regulation of transcription by RNA polymerase II	792	21	GO:BP	1.12e-06	SATB2,INSM1,TBX15,FOXG1,DLX1,HAND1,OLIG3,FEZF1,TBR1,GFI1,FOXL2,SOX8,NR2E1,PAX6,HIC1,TBX18,SIX1,ALX1,TCF7,EMX1,TBX20
query_1	GO:0005634	nucleus	6278	69	GO:CC	1.35e-06	EVX1,HIF1A,ALX3,SATB2,PITX2,NKX2-4,ZIC1,EXOSC2,ZIC2,BSX,INSM1,TBX15,ESRRG,FOXG1,ZIC4,MT1A,ZNF518A,DLX1,ATOH1,HAND1,OLIG3,FEZF1,TBR1,HOXC4,GFI1,SHOX2,FEV,MAFB,FOXL2,SOX8,HOXC11,NR2E1,PAX6,OTX1,DMRT2,CDK20,BNC1,PARVA,HIC1,BRF1,ONECUT2,EVX2,TBX18,ZIC5,GDAP1,HMG20B,NBEA,DHX40,SIX1,KLF14,TP73,SOX21,LHX4,ALX1,TCF7,DMRTA2,PAX3,GATA5,SIM1,EMX1,NECAB1,RNF216,TRIM45,JPH1,MYEF2,TUBB2B,SALL3,TBX20,MYBL2
query_1	GO:0044249	cellular biosynthetic process	5300	62	GO:BP	1.36e-06	EVX1,HIF1A,TRAPPC9,ALX3,SATB2,CDS1,PITX2,NKX2-4,ZIC1,ZIC2,BSX,INSM1,TBX15,ESRRG,FOXG1,ZIC4,GAD2,ZNF518A,DLX1,ATOH1,HAND1,OLIG3,FEZF1,TBR1,HOXC4,GFI1,SHOX2,FEV,MAFB,FOXL2,SOX8,HOXC11,NR2E1,PAX6,OTX1,DMRT2,BNC1,HIC1,BRF1,ONECUT2,EVX2,TBX18,ZIC5,SIX1,KLF14,TP73,ELOVL2,SOX21,LHX4,ALX1,TCF7,DMRTA2,PAX3,GATA5,SIM1,FADS2,EMX1,NECAB1,MYEF2,SALL3,TBX20,MYBL2
query_1	GO:0043229	intracellular organelle	10752	95	GO:CC	1.43e-06	SDCCAG8,EVX1,HIF1A,TRAPPC9,EPHX3,ALX3,SATB2,CDS1,PITX2,NKX2-4,ZIC1,EXOSC2,ZIC2,BSX,INSM1,TBX15,ESRRG,FOXG1,ZIC4,HSPBP1,MT1A,GAD2,ZNF518A,SYNGR3,DLX1,ATOH1,HAND1,OLIG3,FEZF1,TBR1,MYO3A,HOXC4,GFI1,SHOX2,FEV,MAFB,FOXL2,SOX8,HOXC11,NR2E1,SLC15A3,RNF175,OPRM1,PAX6,IL4I1,OTX1,DMRT2,CLVS2,CDK20,BNC1,PARVA,HIC1,GPR62,BRF1,ONECUT2,EVX2,TBX18,ZIC5,GDAP1,HMG20B,WNT2B,NBEA,DHX40,SIX1,KLF14,TP73,ELOVL2,GLRA1,…
query_1	GO:0043233	organelle lumen	5074	60	GO:CC	1.43e-06	EVX1,HIF1A,ALX3,SATB2,PITX2,NKX2-4,ZIC1,EXOSC2,ZIC2,BSX,INSM1,TBX15,ESRRG,FOXG1,DLX1,ATOH1,HAND1,OLIG3,FEZF1,HOXC4,GFI1,SHOX2,FEV,MAFB,FOXL2,SOX8,HOXC11,NR2E1,PAX6,OTX1,DMRT2,CDK20,BNC1,HIC1,BRF1,ONECUT2,EVX2,TBX18,HMG20B,SIX1,KLF14,TP73,SOX21,P4HA3,LHX4,ALX1,MMP9,TCF7,DMRTA2,PAX3,GATA5,SIM1,IGFBP1,EMX1,NECAB1,RNF216,TRIM45,JPH1,TBX20,MYBL2
query_1	GO:0070013	intracellular organelle lumen	5074	60	GO:CC	1.43e-06	EVX1,HIF1A,ALX3,SATB2,PITX2,NKX2-4,ZIC1,EXOSC2,ZIC2,BSX,INSM1,TBX15,ESRRG,FOXG1,DLX1,ATOH1,HAND1,OLIG3,FEZF1,HOXC4,GFI1,SHOX2,FEV,MAFB,FOXL2,SOX8,HOXC11,NR2E1,PAX6,OTX1,DMRT2,CDK20,BNC1,HIC1,BRF1,ONECUT2,EVX2,TBX18,HMG20B,SIX1,KLF14,TP73,SOX21,P4HA3,LHX4,ALX1,MMP9,TCF7,DMRTA2,PAX3,GATA5,SIM1,IGFBP1,EMX1,NECAB1,RNF216,TRIM45,JPH1,TBX20,MYBL2
query_1	GO:0031974	membrane-enclosed lumen	5074	60	GO:CC	1.43e-06	EVX1,HIF1A,ALX3,SATB2,PITX2,NKX2-4,ZIC1,EXOSC2,ZIC2,BSX,INSM1,TBX15,ESRRG,FOXG1,DLX1,ATOH1,HAND1,OLIG3,FEZF1,HOXC4,GFI1,SHOX2,FEV,MAFB,FOXL2,SOX8,HOXC11,NR2E1,PAX6,OTX1,DMRT2,CDK20,BNC1,HIC1,BRF1,ONECUT2,EVX2,TBX18,HMG20B,SIX1,KLF14,TP73,SOX21,P4HA3,LHX4,ALX1,MMP9,TCF7,DMRTA2,PAX3,GATA5,SIM1,IGFBP1,EMX1,NECAB1,RNF216,TRIM45,JPH1,TBX20,MYBL2
query_1	GO:0009058	biosynthetic process	5459	63	GO:BP	1.57e-06	EVX1,HIF1A,TRAPPC9,ALX3,SATB2,CDS1,PITX2,NKX2-4,ZIC1,ZIC2,BSX,INSM1,TBX15,ESRRG,FOXG1,ZIC4,GAD2,ZNF518A,DLX1,ATOH1,HAND1,OLIG3,FEZF1,TBR1,HOXC4,GFI1,SHOX2,FEV,MAFB,FOXL2,SOX8,HOXC11,NR2E1,PAX6,OTX1,DMRT2,BNC1,HIC1,BRF1,ONECUT2,EVX2,TBX18,ZIC5,SIX1,KLF14,TP73,ELOVL2,SOX21,LHX4,ALX1,TCF7,DMRTA2,PAX3,GATA5,SIM1,FADS2,EMX1,NECAB1,MYEF2,SALL3,SQLE,TBX20,MYBL2
query_1	GO:1901576	organic substance biosynthetic process	5377	62	GO:BP	2.4e-06	EVX1,HIF1A,TRAPPC9,ALX3,SATB2,CDS1,PITX2,NKX2-4,ZIC1,ZIC2,BSX,INSM1,TBX15,ESRRG,FOXG1,ZIC4,ZNF518A,DLX1,ATOH1,HAND1,OLIG3,FEZF1,TBR1,HOXC4,GFI1,SHOX2,FEV,MAFB,FOXL2,SOX8,HOXC11,NR2E1,PAX6,OTX1,DMRT2,BNC1,HIC1,BRF1,ONECUT2,EVX2,TBX18,ZIC5,SIX1,KLF14,TP73,ELOVL2,SOX21,LHX4,ALX1,TCF7,DMRTA2,PAX3,GATA5,SIM1,FADS2,EMX1,NECAB1,MYEF2,SALL3,SQLE,TBX20,MYBL2
query_1	GO:0051173	positive regulation of nitrogen compound metabolic process	2864	42	GO:BP	2.46e-06	EVX1,HIF1A,SATB2,PITX2,NKX2-4,ZIC1,ZIC2,BSX,TBX15,ESRRG,HSPBP1,DLX1,ATOH1,HAND1,FEZF1,TBR1,HOXC4,GFI1,MAFB,FOXL2,SOX8,HOXC11,NR2E1,OPRM1,PAX6,OTX1,DMRT2,BRF1,ONECUT2,TBX18,SIX1,KLF14,TP73,SOX21,LHX4,ALX1,MMP9,PAX3,GATA5,SIM1,TBX20,MYBL2
query_1	GO:0009888	tissue development	1908	33	GO:BP	2.55e-06	HIF1A,SATB2,PITX2,DSC3,INSM1,ATOH1,HAND1,TBR1,HOXC4,SHOX2,FOXL2,SOX8,HOXC11,PAX6,DMRT2,BNC1,ONECUT2,TBX18,HMG20B,WNT2B,SIX1,TP73,SOX21,TUFT1,ALX1,MMP9,TCF7,DMRTA2,GATA5,SIM1,IGFBP1,EMX1,TBX20
query_1	GO:0021872	forebrain generation of neurons	60	7	GO:BP	3.65e-06	SATB2,FOXG1,DLX1,TBR1,NR2E1,PAX6,SALL3
query_1	GO:0010604	positive regulation of macromolecule metabolic process	3025	43	GO:BP	3.78e-06	EVX1,HIF1A,SATB2,PITX2,NKX2-4,ZIC1,ZIC2,BSX,TBX15,ESRRG,HSPBP1,DLX1,ATOH1,HAND1,FEZF1,TBR1,HOXC4,GFI1,FEV,MAFB,FOXL2,SOX8,HOXC11,NR2E1,OPRM1,PAX6,OTX1,DMRT2,BRF1,ONECUT2,TBX18,SIX1,KLF14,TP73,SOX21,LHX4,ALX1,MMP9,PAX3,GATA5,SIM1,TBX20,MYBL2
query_1	GO:0001501	skeletal system development	497	16	GO:BP	4.04e-06	HIF1A,ALX3,SATB2,PITX2,TBX15,DLX1,HAND1,HOXC4,SHOX2,HOXC11,DMRT2,WNT2B,SIX1,ALX1,MMP9,TRIM45
query_1	GO:0043227	membrane-bounded organelle	10589	93	GO:CC	4.54e-06	EVX1,HIF1A,TRAPPC9,EPHX3,ALX3,SATB2,CDS1,PITX2,NKX2-4,ZIC1,EXOSC2,ZIC2,BSX,INSM1,TBX15,ESRRG,FOXG1,ZIC4,HSPBP1,MT1A,GAD2,ZNF518A,SYNGR3,DLX1,ATOH1,HAND1,OLIG3,FEZF1,TBR1,HOXC4,GFI1,SHOX2,FEV,MAFB,FOXL2,SOX8,HOXC11,NR2E1,SLC15A3,RNF175,OPRM1,PAX6,IL4I1,OTX1,DMRT2,CLVS2,CDK20,BNC1,PARVA,HIC1,GPR62,BRF1,ONECUT2,EVX2,TBX18,ZIC5,GDAP1,HMG20B,WNT2B,NBEA,DHX40,SIX1,KLF14,TP73,ELOVL2,GLRA1,SOX21,P4HA3,LH…
query_1	GO:0048704	embryonic skeletal system morphogenesis	94	8	GO:BP	5.18e-06	ALX3,SATB2,TBX15,HOXC4,SHOX2,HOXC11,SIX1,ALX1
query_1	GO:0019222	regulation of metabolic process	5935	65	GO:BP	5.96e-06	EVX1,HIF1A,TRAPPC9,ALX3,SATB2,PITX2,NKX2-4,ZIC1,EXOSC2,ZIC2,BSX,INSM1,TBX15,ESRRG,FOXG1,ZIC4,HSPBP1,ZNF518A,DLX1,ATOH1,HAND1,OLIG3,FEZF1,TBR1,PPP1R14A,HOXC4,GFI1,SHOX2,FEV,MAFB,FOXL2,SOX8,HOXC11,NR2E1,OPRM1,PAX6,OTX1,DMRT2,BNC1,HIC1,BRF1,ONECUT2,EVX2,TBX18,ZIC5,HMG20B,SIX1,KLF14,TP73,SOX21,LHX4,ALX1,MMP9,TCF7,DMRTA2,PAX3,GATA5,SIM1,EMX1,NECAB1,MYEF2,SALL3,SQLE,TBX20,MYBL2
query_1	GO:0061072	iris morphogenesis	9	4	GO:BP	6.06e-06	HIF1A,PITX2,PAX6,WNT2B
query_1	GO:0001217	DNA-binding transcription repressor activity	239	11	GO:MF	7.83e-06	INSM1,TBX15,HAND1,FEZF1,GFI1,NR2E1,PAX6,HIC1,TBX18,TCF7,EMX1
query_1	GO:0001227	DNA-binding transcription repressor activity, RNA polymerase II-specific	239	11	GO:MF	7.83e-06	INSM1,TBX15,HAND1,FEZF1,GFI1,NR2E1,PAX6,HIC1,TBX18,TCF7,EMX1
query_1	GO:0005622	intracellular	12177	100	GO:CC	8.46e-06	SDCCAG8,EVX1,HIF1A,TRAPPC9,EPHX3,ALX3,SATB2,CDS1,PITX2,NKX2-4,ZIC1,DSC3,EXOSC2,ZIC2,BSX,INSM1,TBX15,ESRRG,FOXG1,ZIC4,HSPBP1,MT1A,GAD2,ZNF518A,SYNGR3,DLX1,ATOH1,HAND1,SLC26A5,OLIG3,FEZF1,TBR1,PPP1R14A,MYO3A,HOXC4,GFI1,SHOX2,FEV,MAFB,FOXL2,SOX8,DUPD1,HOXC11,NR2E1,SLC15A3,RNF175,OPRM1,PAX6,IL4I1,OTX1,DMRT2,CLVS2,CDK20,BNC1,PARVA,HIC1,GPR62,BRF1,ONECUT2,EVX2,TBX18,ZIC5,GDAP1,HMG20B,WNT2B,NBEA,DHX40,S…
query_1	GO:0007423	sensory organ development	529	16	GO:BP	8.97e-06	HIF1A,PITX2,ZIC1,FOXG1,DLX1,ATOH1,SLC26A5,MYO3A,MAFB,FOXL2,SOX8,NR2E1,PAX6,OTX1,WNT2B,SIX1
query_1	GO:0031325	positive regulation of cellular metabolic process	3016	42	GO:BP	9.74e-06	EVX1,HIF1A,SATB2,PITX2,NKX2-4,ZIC1,ZIC2,BSX,TBX15,ESRRG,HSPBP1,DLX1,ATOH1,HAND1,FEZF1,TBR1,HOXC4,GFI1,MAFB,FOXL2,SOX8,HOXC11,NR2E1,OPRM1,PAX6,OTX1,DMRT2,BRF1,ONECUT2,TBX18,SIX1,KLF14,TP73,SOX21,LHX4,ALX1,MMP9,PAX3,GATA5,SIM1,TBX20,MYBL2
query_1	GO:0021871	forebrain regionalization	24	5	GO:BP	1.16e-05	FEZF1,PAX6,WNT2B,DMRTA2,EMX1
query_1	GO:0034641	cellular nitrogen compound metabolic process	5489	61	GO:BP	1.33e-05	EVX1,HIF1A,TRAPPC9,ALX3,SATB2,CDS1,PITX2,NKX2-4,ZIC1,EXOSC2,ZIC2,BSX,INSM1,TBX15,ESRRG,FOXG1,ZIC4,ZNF518A,DLX1,ATOH1,HAND1,OLIG3,FEZF1,TBR1,HOXC4,GFI1,SHOX2,FEV,MAFB,FOXL2,SOX8,HOXC11,NR2E1,PAX6,OTX1,DMRT2,BNC1,HIC1,BRF1,ONECUT2,EVX2,TBX18,ZIC5,DHX40,SIX1,KLF14,TP73,ELOVL2,SOX21,LHX4,ALX1,TCF7,DMRTA2,PAX3,GATA5,SIM1,EMX1,MYEF2,SALL3,TBX20,MYBL2
query_1	GO:0001764	neuron migration	147	9	GO:BP	1.35e-05	SDCCAG8,SATB2,FOXG1,ATOH1,OLIG3,FEZF1,PAX6,TUBB2B,TBX20
query_1	GO:0021877	forebrain neuron fate commitment	11	4	GO:BP	1.48e-05	SATB2,DLX1,TBR1,PAX6
query_1	GO:0021879	forebrain neuron differentiation	47	6	GO:BP	1.55e-05	SATB2,FOXG1,DLX1,TBR1,PAX6,SALL3
query_1	GO:0043228	non-membrane-bounded organelle	4252	51	GO:CC	1.81e-05	SDCCAG8,EVX1,HIF1A,ALX3,SATB2,PITX2,NKX2-4,EXOSC2,BSX,TBX15,ESRRG,FOXG1,DLX1,ATOH1,HAND1,OLIG3,MYO3A,HOXC4,SHOX2,FEV,MAFB,FOXL2,SOX8,HOXC11,NR2E1,PAX6,OTX1,DMRT2,PARVA,HIC1,ONECUT2,EVX2,TBX18,HMG20B,SIX1,KLF14,TP73,SOX21,LHX4,ALX1,TCF7,DMRTA2,PAX3,GATA5,SIM1,EMX1,JPH1,TUBB2B,TBX20,TRIM36,MYBL2
query_1	GO:0043232	intracellular non-membrane-bounded organelle	4243	51	GO:CC	1.81e-05	SDCCAG8,EVX1,HIF1A,ALX3,SATB2,PITX2,NKX2-4,EXOSC2,BSX,TBX15,ESRRG,FOXG1,DLX1,ATOH1,HAND1,OLIG3,MYO3A,HOXC4,SHOX2,FEV,MAFB,FOXL2,SOX8,HOXC11,NR2E1,PAX6,OTX1,DMRT2,PARVA,HIC1,ONECUT2,EVX2,TBX18,HMG20B,SIX1,KLF14,TP73,SOX21,LHX4,ALX1,TCF7,DMRTA2,PAX3,GATA5,SIM1,EMX1,JPH1,TUBB2B,TBX20,TRIM36,MYBL2
query_1	GO:0044260	cellular macromolecule metabolic process	7161	72	GO:BP	1.86e-05	EVX1,HIF1A,TRAPPC9,ALX3,SATB2,PITX2,NKX2-4,ZIC1,EXOSC2,ZIC2,BSX,INSM1,TBX15,ESRRG,FOXG1,ZIC4,HSPBP1,ZNF518A,DLX1,ATOH1,HAND1,OLIG3,FEZF1,TBR1,PPP1R14A,MYO3A,HOXC4,GFI1,SHOX2,FEV,MAFB,FOXL2,SOX8,DUPD1,HOXC11,NR2E1,RNF175,OPRM1,PAX6,OTX1,DMRT2,CDK20,BNC1,HIC1,BRF1,ONECUT2,EVX2,TBX18,ZIC5,HMG20B,SIX1,KLF14,TP73,SOX21,P4HA3,LHX4,ALX1,MMP9,TCF7,DMRTA2,PAX3,GATA5,SIM1,IGFBP1,EMX1,NECAB1,RNF216,MYEF2,SA…
query_1	GO:0048518	positive regulation of biological process	5419	60	GO:BP	2.06e-05	EVX1,HIF1A,TRAPPC9,SATB2,PITX2,NKX2-4,ZIC1,EXOSC2,ZIC2,BSX,INSM1,TBX15,ESRRG,FOXG1,HSPBP1,SYNGR3,DLX1,ATOH1,HAND1,SLC26A5,FEZF1,TBR1,HOXC4,GFI1,SHOX2,FEV,MAFB,FOXL2,SOX8,HOXC11,NR2E1,OPRM1,PAX6,OTX1,DMRT2,BNC1,HIC1,GPR62,BRF1,ONECUT2,TBX18,HMG20B,WNT2B,SIX1,KLF14,TP73,GLRA1,SOX21,LHX4,ALX1,CACNA2D1,MMP9,DMRTA2,PAX3,GATA5,SIM1,IGFBP1,TUBB2B,TBX20,MYBL2
query_1	GO:0043226	organelle	11482	96	GO:CC	2.06e-05	SDCCAG8,EVX1,HIF1A,TRAPPC9,EPHX3,ALX3,SATB2,CDS1,PITX2,NKX2-4,ZIC1,EXOSC2,ZIC2,BSX,INSM1,TBX15,ESRRG,FOXG1,ZIC4,HSPBP1,MT1A,GAD2,ZNF518A,SYNGR3,DLX1,ATOH1,HAND1,OLIG3,FEZF1,TBR1,MYO3A,HOXC4,GFI1,SHOX2,FEV,MAFB,FOXL2,SOX8,HOXC11,NR2E1,SLC15A3,RNF175,OPRM1,PAX6,IL4I1,OTX1,DMRT2,CLVS2,CDK20,BNC1,PARVA,HIC1,GPR62,BRF1,ONECUT2,EVX2,TBX18,ZIC5,GDAP1,HMG20B,WNT2B,NBEA,DHX40,SIX1,KLF14,TP73,ELOVL2,GLRA1,…
query_1	GO:2000179	positive regulation of neural precursor cell proliferation	51	6	GO:BP	2.46e-05	HIF1A,INSM1,FOXG1,NR2E1,PAX6,DMRTA2
query_1	GO:0005667	transcription factor complex	335	12	GO:CC	2.87e-05	HIF1A,SATB2,PITX2,BSX,HAND1,MAFB,SOX8,BRF1,SIX1,SOX21,ALX1,TCF7
query_1	GO:1903507	negative regulation of nucleic acid-templated transcription	1152	23	GO:BP	2.91e-05	SATB2,ZIC2,INSM1,TBX15,FOXG1,DLX1,HAND1,OLIG3,FEZF1,TBR1,GFI1,FEV,FOXL2,SOX8,NR2E1,PAX6,HIC1,TBX18,SIX1,ALX1,TCF7,EMX1,TBX20
query_1	GO:1902679	negative regulation of RNA biosynthetic process	1153	23	GO:BP	2.92e-05	SATB2,ZIC2,INSM1,TBX15,FOXG1,DLX1,HAND1,OLIG3,FEZF1,TBR1,GFI1,FEV,FOXL2,SOX8,NR2E1,PAX6,HIC1,TBX18,SIX1,ALX1,TCF7,EMX1,TBX20
query_1	GO:0009893	positive regulation of metabolic process	3290	43	GO:BP	3.48e-05	EVX1,HIF1A,SATB2,PITX2,NKX2-4,ZIC1,ZIC2,BSX,TBX15,ESRRG,HSPBP1,DLX1,ATOH1,HAND1,FEZF1,TBR1,HOXC4,GFI1,FEV,MAFB,FOXL2,SOX8,HOXC11,NR2E1,OPRM1,PAX6,OTX1,DMRT2,BRF1,ONECUT2,TBX18,SIX1,KLF14,TP73,SOX21,LHX4,ALX1,MMP9,PAX3,GATA5,SIM1,TBX20,MYBL2
query_1	GO:2000177	regulation of neural precursor cell proliferation	86	7	GO:BP	3.62e-05	HIF1A,INSM1,FOXG1,NR2E1,PAX6,DMRTA2,EMX1
query_1	GO:0008134	transcription factor binding	624	16	GO:MF	4.57e-05	HIF1A,PITX2,TBX15,HAND1,SLC26A5,TBR1,HOXC4,MAFB,FOXL2,SOX8,PAX6,BRF1,TBX18,SIX1,TP73,TBX20
query_1	GO:0050767	regulation of neurogenesis	770	18	GO:BP	5.64e-05	HIF1A,FOXG1,DLX1,ATOH1,FEZF1,TBR1,GFI1,SHOX2,SOX8,NR2E1,OPRM1,PAX6,HMG20B,SIX1,TP73,DMRTA2,EMX1,TUBB2B
query_1	GO:0045892	negative regulation of transcription, DNA-templated	1112	22	GO:BP	5.77e-05	SATB2,ZIC2,INSM1,TBX15,FOXG1,DLX1,HAND1,OLIG3,FEZF1,TBR1,GFI1,FOXL2,SOX8,NR2E1,PAX6,HIC1,TBX18,SIX1,ALX1,TCF7,EMX1,TBX20
query_1	GO:0060429	epithelium development	1207	23	GO:BP	6.08e-05	HIF1A,PITX2,DSC3,INSM1,ATOH1,HAND1,TBR1,FOXL2,SOX8,PAX6,DMRT2,ONECUT2,TBX18,WNT2B,SIX1,SOX21,ALX1,MMP9,TCF7,GATA5,SIM1,EMX1,TBX20
query_1	GO:0010092	specification of animal organ identity	35	5	GO:BP	7.12e-05	TBR1,HOXC11,WNT2B,SIX1,GATA5
query_1	GO:0031128	developmental induction	35	5	GO:BP	7.12e-05	SOX8,HOXC11,WNT2B,SIX1,GATA5
query_1	GO:0042472	inner ear morphogenesis	96	7	GO:BP	7.2e-05	ZIC1,FOXG1,ATOH1,MYO3A,MAFB,OTX1,SIX1
query_1	GO:0051253	negative regulation of RNA metabolic process	1224	23	GO:BP	7.43e-05	SATB2,ZIC2,INSM1,TBX15,FOXG1,DLX1,HAND1,OLIG3,FEZF1,TBR1,GFI1,FEV,FOXL2,SOX8,NR2E1,PAX6,HIC1,TBX18,SIX1,ALX1,TCF7,EMX1,TBX20
query_1	GO:0048522	positive regulation of cellular process	4806	54	GO:BP	7.66e-05	EVX1,HIF1A,SATB2,PITX2,NKX2-4,ZIC1,EXOSC2,ZIC2,BSX,INSM1,TBX15,ESRRG,FOXG1,HSPBP1,DLX1,ATOH1,HAND1,SLC26A5,FEZF1,TBR1,HOXC4,GFI1,SHOX2,MAFB,FOXL2,SOX8,HOXC11,NR2E1,OPRM1,PAX6,OTX1,DMRT2,BNC1,HIC1,GPR62,BRF1,ONECUT2,TBX18,HMG20B,SIX1,KLF14,TP73,SOX21,LHX4,ALX1,MMP9,DMRTA2,PAX3,GATA5,SIM1,IGFBP1,TUBB2B,TBX20,MYBL2
query_1	GO:0044238	primary metabolic process	8941	81	GO:BP	0.000115235	EVX1,HIF1A,TRAPPC9,EPHX3,ALX3,SATB2,CDS1,PITX2,NKX2-4,ZIC1,EXOSC2,ZIC2,BSX,INSM1,TBX15,ESRRG,FOXG1,ZIC4,HSPBP1,GAD2,ZNF518A,DLX1,ATOH1,HAND1,OLIG3,FEZF1,TBR1,PPP1R14A,MYO3A,HOXC4,GFI1,SHOX2,FEV,MAFB,FOXL2,SOX8,DUPD1,HOXC11,NR2E1,RNF175,OPRM1,PAX6,IL4I1,OTX1,DMRT2,CDK20,BNC1,HIC1,BRF1,ONECUT2,EVX2,TBX18,ZIC5,HMG20B,DHX40,SIX1,KLF14,TP73,ELOVL2,SOX21,P4HA3,LHX4,ALX1,MMP9,TCF7,DMRTA2,PAX3,GATA5,SIM1…
query_1	GO:2000648	positive regulation of stem cell proliferation	40	5	GO:BP	0.00013455	HIF1A,FOXG1,NR2E1,PAX6,DMRTA2
query_1	GO:0050769	positive regulation of neurogenesis	448	13	GO:BP	0.00015683	HIF1A,FOXG1,DLX1,ATOH1,FEZF1,SHOX2,SOX8,OPRM1,PAX6,HMG20B,TP73,DMRTA2,TUBB2B
query_1	GO:0009952	anterior/posterior pattern specification	203	9	GO:BP	0.000160771	FEZF1,HOXC4,HOXC11,PAX6,OTX1,DMRT2,TBX18,WNT2B,ALX1
query_1	GO:0045934	negative regulation of nucleobase-containing compound metabolic process	1298	23	GO:BP	0.000186896	SATB2,ZIC2,INSM1,TBX15,FOXG1,DLX1,HAND1,OLIG3,FEZF1,TBR1,GFI1,FEV,FOXL2,SOX8,NR2E1,PAX6,HIC1,TBX18,SIX1,ALX1,TCF7,EMX1,TBX20
query_1	GO:0006807	nitrogen compound metabolic process	8545	78	GO:BP	0.000198324	EVX1,HIF1A,TRAPPC9,ALX3,SATB2,CDS1,PITX2,NKX2-4,ZIC1,EXOSC2,ZIC2,BSX,INSM1,TBX15,ESRRG,FOXG1,ZIC4,HSPBP1,GAD2,ZNF518A,DLX1,ATOH1,HAND1,OLIG3,FEZF1,TBR1,PPP1R14A,MYO3A,HOXC4,GFI1,SHOX2,FEV,MAFB,FOXL2,SOX8,DUPD1,HOXC11,NR2E1,RNF175,OPRM1,PAX6,IL4I1,OTX1,DMRT2,CDK20,BNC1,HIC1,BRF1,ONECUT2,EVX2,TBX18,ZIC5,HMG20B,DHX40,SIX1,KLF14,TP73,ELOVL2,SOX21,P4HA3,LHX4,ALX1,MMP9,TCF7,DMRTA2,PAX3,GATA5,SIM1,IGFBP…
query_1	GO:0021796	cerebral cortex regionalization	7	3	GO:BP	0.000201154	PAX6,DMRTA2,EMX1
query_1	GO:0021902	commitment of neuronal cell to specific neuron type in forebrain	7	3	GO:BP	0.000201154	SATB2,TBR1,PAX6
query_1	GO:0051960	regulation of nervous system development	859	18	GO:BP	0.000223106	HIF1A,FOXG1,DLX1,ATOH1,FEZF1,TBR1,GFI1,SHOX2,SOX8,NR2E1,OPRM1,PAX6,HMG20B,SIX1,TP73,DMRTA2,EMX1,TUBB2B
query_1	GO:0042471	ear morphogenesis	116	7	GO:BP	0.000228634	ZIC1,FOXG1,ATOH1,MYO3A,MAFB,OTX1,SIX1
query_1	GO:0033613	activating transcription factor binding	83	6	GO:MF	0.000267067	PITX2,TBX15,TBR1,HOXC4,TBX18,TBX20
query_1	GO:0001759	organ induction	23	4	GO:BP	0.000289207	HOXC11,WNT2B,SIX1,GATA5
query_1	GO:0002052	positive regulation of neuroblast proliferation	23	4	GO:BP	0.000289207	HIF1A,FOXG1,PAX6,DMRTA2
query_1	GO:0001102	RNA polymerase II activating transcription factor binding	51	5	GO:MF	0.000303625	PITX2,TBX15,TBR1,TBX18,TBX20
query_1	GO:0021517	ventral spinal cord development	48	5	GO:BP	0.000306608	EVX1,OLIG3,PAX6,LHX4,TBX20
query_1	GO:0060284	regulation of cell development	890	18	GO:BP	0.000345987	HIF1A,FOXG1,DLX1,ATOH1,FEZF1,TBR1,GFI1,SHOX2,SOX8,NR2E1,OPRM1,PAX6,HMG20B,SIX1,TP73,DMRTA2,EMX1,TUBB2B
query_1	GO:0048468	cell development	1977	29	GO:BP	0.000359197	HIF1A,SATB2,PITX2,INSM1,FOXG1,DLX1,ATOH1,FEZF1,TBR1,GFI1,SHOX2,FEV,FOXL2,SOX8,NR2E1,OPRM1,PAX6,PARVA,ONECUT2,HMG20B,SIX1,TP73,LHX4,ALX1,DMRTA2,CNTNAP2,EMX1,TUBB2B,SALL3
query_1	GO:0051094	positive regulation of developmental process	1272	22	GO:BP	0.000407656	HIF1A,INSM1,FOXG1,DLX1,ATOH1,FEZF1,SHOX2,SOX8,HOXC11,NR2E1,OPRM1,PAX6,DMRT2,HMG20B,WNT2B,SIX1,TP73,ALX1,DMRTA2,GATA5,TUBB2B,TBX20
query_1	GO:0051962	positive regulation of nervous system development	500	13	GO:BP	0.000448757	HIF1A,FOXG1,DLX1,ATOH1,FEZF1,SHOX2,SOX8,OPRM1,PAX6,HMG20B,TP73,DMRTA2,TUBB2B
query_1	GO:0043170	macromolecule metabolic process	8081	74	GO:BP	0.000491791	EVX1,HIF1A,TRAPPC9,ALX3,SATB2,PITX2,NKX2-4,ZIC1,EXOSC2,ZIC2,BSX,INSM1,TBX15,ESRRG,FOXG1,ZIC4,HSPBP1,ZNF518A,DLX1,ATOH1,HAND1,OLIG3,FEZF1,TBR1,PPP1R14A,MYO3A,HOXC4,GFI1,SHOX2,FEV,MAFB,FOXL2,SOX8,DUPD1,HOXC11,NR2E1,RNF175,OPRM1,PAX6,OTX1,DMRT2,CDK20,BNC1,HIC1,BRF1,ONECUT2,EVX2,TBX18,ZIC5,HMG20B,DHX40,SIX1,KLF14,TP73,SOX21,P4HA3,LHX4,ALX1,MMP9,TCF7,DMRTA2,PAX3,GATA5,SIM1,IGFBP1,EMX1,NECAB1,RNF216,PR…
query_1	GO:0007517	muscle organ development	363	11	GO:BP	0.000493787	HAND1,SHOX2,FOXL2,SOX8,HMG20B,SIX1,TP73,DMRTA2,PAX3,JPH1,TBX20
query_1	GO:0010558	negative regulation of macromolecule biosynthetic process	1392	23	GO:BP	0.000512197	SATB2,ZIC2,INSM1,TBX15,FOXG1,DLX1,HAND1,OLIG3,FEZF1,TBR1,GFI1,FEV,FOXL2,SOX8,NR2E1,PAX6,HIC1,TBX18,SIX1,ALX1,TCF7,EMX1,TBX20
query_1	GO:0021515	cell differentiation in spinal cord	54	5	GO:BP	0.000516211	EVX1,OLIG3,PAX6,LHX4,TBX20
query_1	GO:0070722	Tle3-Aes complex	2	2	GO:CC	0.000607834	TBX15,TBX18
query_1	GO:0010720	positive regulation of cell development	522	13	GO:BP	0.000676102	HIF1A,FOXG1,DLX1,ATOH1,FEZF1,SHOX2,SOX8,OPRM1,PAX6,HMG20B,TP73,DMRTA2,TUBB2B
query_1	GO:0048839	inner ear development	191	8	GO:BP	0.000685514	ZIC1,FOXG1,ATOH1,SLC26A5,MYO3A,MAFB,OTX1,SIX1
query_1	GO:2000113	negative regulation of cellular macromolecule biosynthetic process	1323	22	GO:BP	0.000701251	SATB2,ZIC2,INSM1,TBX15,FOXG1,DLX1,HAND1,OLIG3,FEZF1,TBR1,GFI1,FOXL2,SOX8,NR2E1,PAX6,HIC1,TBX18,SIX1,ALX1,TCF7,EMX1,TBX20
query_1	GO:0003007	heart morphogenesis	252	9	GO:BP	0.000759259	HIF1A,PITX2,HAND1,TBR1,SHOX2,PARVA,SIX1,GATA5,TBX20
query_1	GO:0045664	regulation of neuron differentiation	611	14	GO:BP	0.000801443	FOXG1,DLX1,ATOH1,FEZF1,TBR1,GFI1,SHOX2,SOX8,NR2E1,PAX6,HMG20B,SIX1,TP73,TUBB2B
query_1	GO:0071704	organic substance metabolic process	9339	81	GO:BP	0.000803368	EVX1,HIF1A,TRAPPC9,EPHX3,ALX3,SATB2,CDS1,PITX2,NKX2-4,ZIC1,EXOSC2,ZIC2,BSX,INSM1,TBX15,ESRRG,FOXG1,ZIC4,HSPBP1,GAD2,ZNF518A,DLX1,ATOH1,HAND1,OLIG3,FEZF1,TBR1,PPP1R14A,MYO3A,HOXC4,GFI1,SHOX2,FEV,MAFB,FOXL2,SOX8,DUPD1,HOXC11,NR2E1,RNF175,OPRM1,PAX6,IL4I1,OTX1,DMRT2,CDK20,BNC1,HIC1,BRF1,ONECUT2,EVX2,TBX18,ZIC5,HMG20B,DHX40,SIX1,KLF14,TP73,ELOVL2,SOX21,P4HA3,LHX4,ALX1,MMP9,TCF7,DMRTA2,PAX3,GATA5,SIM1…
query_1	GO:0044237	cellular metabolic process	9170	80	GO:BP	0.000803368	EVX1,HIF1A,TRAPPC9,EPHX3,ALX3,SATB2,CDS1,PITX2,NKX2-4,ZIC1,EXOSC2,ZIC2,BSX,INSM1,TBX15,ESRRG,FOXG1,ZIC4,HSPBP1,GAD2,ZNF518A,DLX1,ATOH1,HAND1,OLIG3,FEZF1,TBR1,PPP1R14A,MYO3A,HOXC4,GFI1,SHOX2,FEV,MAFB,FOXL2,SOX8,DUPD1,HOXC11,NR2E1,RNF175,OPRM1,PAX6,IL4I1,OTX1,DMRT2,CDK20,BNC1,HIC1,BRF1,ONECUT2,EVX2,TBX18,ZIC5,HMG20B,DHX40,SIX1,KLF14,TP73,ELOVL2,SOX21,P4HA3,LHX4,ALX1,MMP9,TCF7,DMRTA2,PAX3,GATA5,SIM1…
query_1	GO:0061351	neural precursor cell proliferation	145	7	GO:BP	0.000840125	HIF1A,INSM1,FOXG1,NR2E1,PAX6,DMRTA2,EMX1
query_1	GO:0031327	negative regulation of cellular biosynthetic process	1445	23	GO:BP	0.000856837	SATB2,ZIC2,INSM1,TBX15,FOXG1,DLX1,HAND1,OLIG3,FEZF1,TBR1,GFI1,FEV,FOXL2,SOX8,NR2E1,PAX6,HIC1,TBX18,SIX1,ALX1,TCF7,EMX1,TBX20
query_1	HP:0009484	Deviation of the hand or of fingers of the hand	322	12	HP	0.0008721	TRAPPC9,ALX3,SATB2,TBX15,FOXG1,MAFB,HIC1,ALX1,PAX3,GATA5,SIM1,RNF216
query_1	HP:0032039	Abnormality of the ocular adnexa	1007	21	HP	0.0008721	SDCCAG8,TRAPPC9,ALX3,SATB2,PITX2,DSC3,EXOSC2,ZIC2,TBX15,FOXG1,TBR1,MAFB,FOXL2,HIC1,BRF1,SIX1,ALX1,PAX3,SIM1,CNTNAP2,TUBB2B
query_1	HP:0030669	Abnormal ocular adnexa morphology	992	21	HP	0.0008721	SDCCAG8,TRAPPC9,ALX3,SATB2,PITX2,DSC3,EXOSC2,ZIC2,TBX15,FOXG1,TBR1,MAFB,FOXL2,HIC1,BRF1,SIX1,ALX1,PAX3,SIM1,CNTNAP2,TUBB2B
query_1	HP:0000315	Abnormality of the orbital region	1032	21	HP	0.0008721	SDCCAG8,TRAPPC9,ALX3,SATB2,PITX2,DSC3,EXOSC2,ZIC2,TBX15,FOXG1,TBR1,MAFB,FOXL2,HIC1,BRF1,SIX1,ALX1,PAX3,SIM1,CNTNAP2,TUBB2B
query_1	HP:0011844	Abnormal appendicular skeleton morphology	1200	23	HP	0.0008721	SDCCAG8,TRAPPC9,ALX3,SATB2,ZIC1,EXOSC2,TBX15,FOXG1,TBR1,MAFB,HIC1,BRF1,GDAP1,SIX1,GLRA1,LHX4,ALX1,MMP9,PAX3,GATA5,SIM1,RNF216,JPH1
query_1	GO:0016331	morphogenesis of embryonic epithelium	149	7	GO:BP	0.000985134	HIF1A,HAND1,SOX8,TBX18,WNT2B,SIX1,ALX1
query_1	GO:0050789	regulation of biological process	9900	84	GO:BP	0.000989547	SDCCAG8,EVX1,HIF1A,TRAPPC9,ALX3,SATB2,CDS1,PITX2,NKX2-4,ZIC1,EXOSC2,ZIC2,BSX,INSM1,TBX15,ESRRG,FOXG1,ZIC4,HSPBP1,MT1A,ZNF518A,SYNGR3,DLX1,ATOH1,HAND1,SLC26A5,OLIG3,FEZF1,TBR1,PPP1R14A,HOXC4,GFI1,SHOX2,FEV,MAFB,FOXL2,SOX8,HOXC11,NR2E1,RNF175,OPRM1,PAX6,OTX1,DMRT2,CDK20,BNC1,PARVA,HIC1,GPR62,BRF1,ONECUT2,EVX2,TBX18,ZIC5,HMG20B,WNT2B,SIX1,KLF14,TP73,GLRA1,SOX21,TUFT1,LHX4,ALX1,CACNA2D1,MMP9,TCF7,DMR…
query_1	GO:0048645	animal organ formation	63	5	GO:BP	0.00100517	TBR1,HOXC11,WNT2B,SIX1,GATA5
query_1	HP:0002813	Abnormality of limb bone morphology	1103	21	HP	0.00107161	SDCCAG8,TRAPPC9,ALX3,SATB2,ZIC1,EXOSC2,TBX15,FOXG1,TBR1,MAFB,HIC1,BRF1,GDAP1,LHX4,ALX1,MMP9,PAX3,GATA5,SIM1,RNF216,JPH1
query_1	HP:0004097	Deviation of finger	312	11	HP	0.00107161	TRAPPC9,ALX3,SATB2,TBX15,FOXG1,HIC1,ALX1,PAX3,GATA5,SIM1,RNF216
query_1	HP:0001595	Abnormal hair morphology	832	18	HP	0.00107161	SDCCAG8,TRAPPC9,ALX3,SATB2,ZIC1,DSC3,EXOSC2,ZIC2,TBX15,FOXG1,FEZF1,MAFB,FOXL2,BRF1,LHX4,ALX1,PAX3,CNTNAP2
query_1	HP:0040019	Finger clinodactyly	249	10	HP	0.00107161	TRAPPC9,ALX3,SATB2,TBX15,FOXG1,HIC1,ALX1,GATA5,SIM1,RNF216
query_1	HP:0000492	Abnormal eyelid morphology	842	18	HP	0.00107161	SDCCAG8,TRAPPC9,ALX3,SATB2,PITX2,DSC3,EXOSC2,ZIC2,TBX15,FOXG1,TBR1,MAFB,FOXL2,HIC1,ALX1,PAX3,SIM1,CNTNAP2
query_1	HP:0000159	Abnormal lip morphology	671	16	HP	0.00107161	TRAPPC9,ALX3,SATB2,PITX2,EXOSC2,ZIC2,FOXG1,TBR1,MAFB,PAX6,HIC1,SIX1,LHX4,PAX3,GATA5,CNTNAP2
query_1	HP:0040068	Abnormality of limb bone	1103	21	HP	0.00107161	SDCCAG8,TRAPPC9,ALX3,SATB2,ZIC1,EXOSC2,TBX15,FOXG1,TBR1,MAFB,HIC1,BRF1,GDAP1,LHX4,ALX1,MMP9,PAX3,GATA5,SIM1,RNF216,JPH1
query_1	GO:0009890	negative regulation of biosynthetic process	1469	23	GO:BP	0.00107355	SATB2,ZIC2,INSM1,TBX15,FOXG1,DLX1,HAND1,OLIG3,FEZF1,TBR1,GFI1,FEV,FOXL2,SOX8,NR2E1,PAX6,HIC1,TBX18,SIX1,ALX1,TCF7,EMX1,TBX20
query_1	GO:1902692	regulation of neuroblast proliferation	33	4	GO:BP	0.00107355	HIF1A,FOXG1,PAX6,DMRTA2
query_1	GO:0050794	regulation of cellular process	9241	80	GO:BP	0.00108827	SDCCAG8,EVX1,HIF1A,TRAPPC9,ALX3,SATB2,CDS1,PITX2,NKX2-4,ZIC1,EXOSC2,ZIC2,BSX,INSM1,TBX15,ESRRG,FOXG1,ZIC4,HSPBP1,ZNF518A,DLX1,ATOH1,HAND1,SLC26A5,OLIG3,FEZF1,TBR1,PPP1R14A,HOXC4,GFI1,SHOX2,FEV,MAFB,FOXL2,SOX8,HOXC11,NR2E1,RNF175,OPRM1,PAX6,OTX1,DMRT2,CDK20,BNC1,PARVA,HIC1,GPR62,BRF1,ONECUT2,EVX2,TBX18,ZIC5,HMG20B,WNT2B,SIX1,KLF14,TP73,GLRA1,SOX21,TUFT1,LHX4,ALX1,MMP9,TCF7,DMRTA2,PAX3,GATA5,SIM1,I…
query_1	HP:0030084	Clinodactyly	328	11	HP	0.00112568	TRAPPC9,ALX3,SATB2,TBX15,FOXG1,HIC1,ALX1,PAX3,GATA5,SIM1,RNF216
query_1	HP:0007990	Hypoplastic iris stroma	7	3	HP	0.00112568	PITX2,MAFB,PAX3
query_1	GO:0021510	spinal cord development	106	6	GO:BP	0.00117634	EVX1,ZIC1,OLIG3,PAX6,LHX4,TBX20
query_1	GO:0072091	regulation of stem cell proliferation	66	5	GO:BP	0.00121672	HIF1A,FOXG1,NR2E1,PAX6,DMRTA2
query_1	GO:0002065	columnar/cuboidal epithelial cell differentiation	107	6	GO:BP	0.00122337	HIF1A,INSM1,ATOH1,PAX6,GATA5,EMX1
query_1	GO:0021978	telencephalon regionalization	13	3	GO:BP	0.00126336	PAX6,DMRTA2,EMX1
query_1	GO:0021522	spinal cord motor neuron differentiation	35	4	GO:BP	0.001307	OLIG3,PAX6,LHX4,TBX20
query_1	GO:2000026	regulation of multicellular organismal development	1924	27	GO:BP	0.00136683	HIF1A,FOXG1,DLX1,ATOH1,FEZF1,TBR1,GFI1,SHOX2,MAFB,SOX8,HOXC11,NR2E1,OPRM1,PAX6,DMRT2,TBX18,HMG20B,WNT2B,SIX1,TP73,ALX1,MMP9,DMRTA2,GATA5,EMX1,TUBB2B,TBX20
query_1	GO:0008150	biological_process	14528	106	GO:BP	0.00142327	SDCCAG8,EVX1,HIF1A,TRAPPC9,EPHX3,ALX3,SATB2,CDS1,PITX2,NKX2-4,ZIC1,DSC3,EXOSC2,ZIC2,BSX,INSM1,TBX15,ESRRG,FOXG1,ZIC4,HSPBP1,MT1A,GAD2,ZNF518A,SYNGR3,DLX1,ATOH1,HAND1,SLC26A5,OLIG3,FEZF1,TBR1,PPP1R14A,MYO3A,HOXC4,GFI1,SHOX2,FEV,MAFB,FOXL2,SOX8,DUPD1,HOXC11,NR2E1,SLC15A3,RNF175,OPRM1,PAX6,IL4I1,OTX1,DMRT2,GJD2,CLVS2,CDK20,BNC1,PARVA,HIC1,GPR62,BRF1,ONECUT2,EVX2,TBX18,ZIC5,GDAP1,HMG20B,WNT2B,NBEA,DH…
query_1	HP:0011297	Abnormal digit morphology	962	19	HP	0.00143119	SDCCAG8,TRAPPC9,ALX3,SATB2,ZIC1,EXOSC2,TBX15,FOXG1,TBR1,MAFB,HIC1,BRF1,GDAP1,LHX4,ALX1,PAX3,GATA5,SIM1,RNF216
query_1	GO:0003156	regulation of animal organ formation	36	4	GO:BP	0.00143508	HOXC11,WNT2B,SIX1,GATA5
query_1	GO:0043583	ear development	217	8	GO:BP	0.00145084	ZIC1,FOXG1,ATOH1,SLC26A5,MYO3A,MAFB,OTX1,SIX1
query_1	GO:0010629	negative regulation of gene expression	1836	26	GO:BP	0.00161366	HIF1A,SATB2,EXOSC2,ZIC2,INSM1,TBX15,FOXG1,DLX1,HAND1,OLIG3,FEZF1,TBR1,GFI1,FOXL2,SOX8,NR2E1,PAX6,HIC1,TBX18,SIX1,ALX1,TCF7,GATA5,EMX1,MYEF2,TBX20
query_1	GO:0072089	stem cell proliferation	115	6	GO:BP	0.00173495	HIF1A,FOXG1,NR2E1,PAX6,WNT2B,DMRTA2
query_1	GO:0014706	striated muscle tissue development	356	10	GO:BP	0.00180693	HAND1,SHOX2,FOXL2,SOX8,HMG20B,SIX1,TP73,DMRTA2,GATA5,TBX20
query_1	GO:0051240	positive regulation of multicellular organismal process	1635	24	GO:BP	0.00180703	HIF1A,ESRRG,FOXG1,DLX1,ATOH1,FEZF1,SHOX2,FOXL2,SOX8,HOXC11,NR2E1,OPRM1,PAX6,DMRT2,HMG20B,WNT2B,SIX1,TP73,ALX1,MMP9,DMRTA2,GATA5,TUBB2B,TBX20
query_1	CORUM:6768	TBX20-TBX18 repressor complex	2	2	CORUM	0.00185155	TBX18,TBX20
query_1	GO:0110165	cellular anatomical entity	14917	107	GO:CC	0.00199843	SDCCAG8,EVX1,HIF1A,TRAPPC9,EPHX3,ALX3,SATB2,CDS1,PITX2,NKX2-4,ZIC1,DSC3,EXOSC2,ZIC2,BSX,INSM1,TBX15,ESRRG,FOXG1,ZIC4,HSPBP1,MT1A,GAD2,ZNF518A,SYNGR3,DLX1,ATOH1,HAND1,SLC26A5,OLIG3,FEZF1,TBR1,PPP1R14A,MYO3A,HOXC4,GFI1,SHOX2,FEV,MAFB,FOXL2,SOX8,DUPD1,HOXC11,NR2E1,SLC15A3,RNF175,OPRM1,PAX6,IL4I1,OTX1,DMRT2,GJD2,CLVS2,CDK20,BNC1,PARVA,HIC1,GPR62,BRF1,ONECUT2,EVX2,TBX18,ZIC5,GDAP1,HMG20B,WNT2B,NBEA,DH…
query_1	GO:0060173	limb development	171	7	GO:BP	0.00205578	ALX3,PITX2,SHOX2,HOXC11,EVX2,ALX1,SALL3
query_1	GO:0048736	appendage development	171	7	GO:BP	0.00205578	ALX3,PITX2,SHOX2,HOXC11,EVX2,ALX1,SALL3
query_1	GO:0071837	HMG box domain binding	16	3	GO:MF	0.0020875	HOXC4,PAX6,PAX3
query_1	HP:0001155	Abnormality of the hand	996	19	HP	0.00214147	SDCCAG8,TRAPPC9,ALX3,SATB2,ZIC1,EXOSC2,TBX15,FOXG1,TBR1,MAFB,HIC1,BRF1,GDAP1,ALX1,PAX3,GATA5,SIM1,RNF216,JPH1
query_1	HP:0002817	Abnormality of the upper limb	1091	20	HP	0.00214147	SDCCAG8,TRAPPC9,ALX3,SATB2,ZIC1,EXOSC2,TBX15,FOXG1,TBR1,MAFB,HIC1,BRF1,GDAP1,ALX1,MMP9,PAX3,GATA5,SIM1,RNF216,JPH1
query_1	GO:0003151	outflow tract morphogenesis	77	5	GO:BP	0.0023259	HIF1A,PITX2,PARVA,SIX1,TBX20
query_1	GO:0048705	skeletal system morphogenesis	237	8	GO:BP	0.00253979	ALX3,SATB2,TBX15,HOXC4,SHOX2,HOXC11,SIX1,ALX1
query_1	GO:0110110	positive regulation of animal organ morphogenesis	79	5	GO:BP	0.00258924	SOX8,HOXC11,WNT2B,SIX1,GATA5
query_1	GO:0060537	muscle tissue development	374	10	GO:BP	0.00258924	HAND1,SHOX2,FOXL2,SOX8,HMG20B,SIX1,TP73,DMRTA2,GATA5,TBX20
query_1	GO:0065007	biological regulation	10483	86	GO:BP	0.00265493	SDCCAG8,EVX1,HIF1A,TRAPPC9,ALX3,SATB2,CDS1,PITX2,NKX2-4,ZIC1,EXOSC2,ZIC2,BSX,INSM1,TBX15,ESRRG,FOXG1,ZIC4,HSPBP1,MT1A,GAD2,ZNF518A,SYNGR3,DLX1,ATOH1,HAND1,SLC26A5,OLIG3,FEZF1,TBR1,PPP1R14A,HOXC4,GFI1,SHOX2,FEV,MAFB,FOXL2,SOX8,HOXC11,NR2E1,RNF175,OPRM1,PAX6,OTX1,DMRT2,GJD2,CDK20,BNC1,PARVA,HIC1,GPR62,BRF1,ONECUT2,EVX2,TBX18,ZIC5,HMG20B,WNT2B,SIX1,KLF14,TP73,GLRA1,SOX21,TUFT1,LHX4,ALX1,CACNA2D1,MMP…
query_1	GO:0090190	positive regulation of branching involved in ureteric bud morphogenesis	17	3	GO:BP	0.00265493	SOX8,WNT2B,SIX1
query_1	HP:0000202	Oral cleft	440	12	HP	0.00267125	TRAPPC9,ALX3,SATB2,ZIC2,TBX15,FEZF1,TBR1,MAFB,SIX1,LHX4,ALX1,PAX3
query_1	HP:0040064	Abnormality of limbs	1550	24	HP	0.00269596	SDCCAG8,TRAPPC9,ALX3,SATB2,ZIC1,EXOSC2,TBX15,FOXG1,FEZF1,TBR1,MAFB,HIC1,BRF1,GDAP1,SIX1,GLRA1,LHX4,ALX1,MMP9,PAX3,GATA5,SIM1,RNF216,JPH1
query_1	HP:0000163	Abnormal oral cavity morphology	1445	23	HP	0.00269596	TRAPPC9,ALX3,SATB2,PITX2,EXOSC2,ZIC2,TBX15,FOXG1,FEZF1,TBR1,GFI1,MAFB,FOXL2,PAX6,HIC1,BRF1,SIX1,LHX4,ALX1,PAX3,GATA5,SIM1,CNTNAP2
query_1	HP:0011842	Abnormality of skeletal morphology	2173	30	HP	0.00269596	SDCCAG8,TRAPPC9,ALX3,SATB2,PITX2,ZIC1,EXOSC2,ZIC2,TBX15,FOXG1,FEZF1,TBR1,GFI1,MAFB,PAX6,HIC1,BRF1,GDAP1,SIX1,GLRA1,LHX4,ALX1,MMP9,PAX3,GATA5,SIM1,CNTNAP2,RNF216,JPH1,TUBB2B
query_1	HP:0100547	Abnormality of forebrain morphology	1334	22	HP	0.00269596	TRAPPC9,ALX3,SATB2,ZIC1,ZIC2,TBX15,FOXG1,FEZF1,TBR1,MAFB,PAX6,HIC1,BRF1,SIX1,LHX4,ALX1,PAX3,SIM1,CNTNAP2,RNF216,TUBB2B,TRIM36
query_1	HP:0001167	Abnormality of finger	774	16	HP	0.00269596	SDCCAG8,TRAPPC9,ALX3,SATB2,EXOSC2,TBX15,FOXG1,TBR1,MAFB,HIC1,BRF1,ALX1,PAX3,GATA5,SIM1,RNF216
query_1	HP:0011138	Abnormality of skin adnexa morphology	955	18	HP	0.00269596	SDCCAG8,TRAPPC9,ALX3,SATB2,ZIC1,DSC3,EXOSC2,ZIC2,TBX15,FOXG1,FEZF1,MAFB,FOXL2,BRF1,LHX4,ALX1,PAX3,CNTNAP2
query_1	HP:0000153	Abnormality of the mouth	1544	24	HP	0.00269596	TRAPPC9,ALX3,SATB2,PITX2,EXOSC2,ZIC2,TBX15,FOXG1,FEZF1,TBR1,GFI1,MAFB,FOXL2,PAX6,HIC1,BRF1,SIX1,LHX4,ALX1,PAX3,GATA5,SIM1,CNTNAP2,TUBB2B
query_1	HP:0004423	Cranium bifidum occultum	2	2	HP	0.00269596	ALX3,ALX1
query_1	HP:0031816	Abnormal oral morphology	1445	23	HP	0.00269596	TRAPPC9,ALX3,SATB2,PITX2,EXOSC2,ZIC2,TBX15,FOXG1,FEZF1,TBR1,GFI1,MAFB,FOXL2,PAX6,HIC1,BRF1,SIX1,LHX4,ALX1,PAX3,GATA5,SIM1,CNTNAP2
query_1	HP:0004207	Abnormal 5th finger morphology	307	10	HP	0.00269596	SDCCAG8,TRAPPC9,ALX3,SATB2,TBX15,FOXG1,HIC1,GATA5,SIM1,RNF216
query_1	HP:0006931	Lipoma of corpus callosum	2	2	HP	0.00269596	ALX3,ALX1
query_1	GO:0048646	anatomical structure formation involved in morphogenesis	1074	18	GO:BP	0.00290897	SDCCAG8,HIF1A,HAND1,TBR1,MAFB,SOX8,HOXC11,NR2E1,PAX6,DMRT2,PARVA,TBX18,WNT2B,SIX1,ALX1,MMP9,GATA5,TBX20
query_1	HP:0008056	Aplasia/Hypoplasia affecting the eye	329	10	HP	0.00309845	ALX3,PITX2,TBX15,TBR1,MAFB,FOXL2,PAX6,LHX4,ALX1,PAX3
query_1	HP:0012385	Camptodactyly	207	8	HP	0.00309845	ALX3,SATB2,TBX15,FOXG1,TBR1,MAFB,ALX1,PAX3
query_1	HP:0000248	Brachycephaly	152	7	HP	0.00309845	TRAPPC9,SATB2,ZIC1,ALX1,SIM1,CNTNAP2,RNF216
query_1	HP:0000383	Abnormality of periauricular region	64	5	HP	0.00309845	ALX3,MAFB,SIX1,ALX1,GATA5
query_1	GO:0060850	regulation of transcription involved in cell fate commitment	18	3	GO:BP	0.00311305	EVX1,DLX1,PAX6
query_1	GO:0072189	ureter development	18	3	GO:BP	0.00311305	SOX8,TBX18,SIX1
query_1	HP:0000175	Cleft palate	411	11	HP	0.00353546	ALX3,SATB2,ZIC2,TBX15,FEZF1,TBR1,MAFB,SIX1,LHX4,ALX1,PAX3
query_1	HP:0100737	Abnormal hard palate morphology	412	11	HP	0.00353546	ALX3,SATB2,ZIC2,TBX15,FEZF1,TBR1,MAFB,SIX1,LHX4,ALX1,PAX3
query_1	HP:0000924	Abnormality of the skeletal system	2255	30	HP	0.00353546	SDCCAG8,TRAPPC9,ALX3,SATB2,PITX2,ZIC1,EXOSC2,ZIC2,TBX15,FOXG1,FEZF1,TBR1,GFI1,MAFB,PAX6,HIC1,BRF1,GDAP1,SIX1,GLRA1,LHX4,ALX1,MMP9,PAX3,GATA5,SIM1,CNTNAP2,RNF216,JPH1,TUBB2B
query_1	GO:0061055	myotome development	4	2	GO:BP	0.00376649	DMRT2,SIX1
query_1	GO:0021913	regulation of transcription from RNA polymerase II promoter involved in ventral spinal cord interneuron specification	4	2	GO:BP	0.00376649	EVX1,PAX6
query_1	GO:0050793	regulation of developmental process	2417	30	GO:BP	0.00406875	HIF1A,INSM1,FOXG1,DLX1,ATOH1,SLC26A5,FEZF1,TBR1,GFI1,SHOX2,MAFB,SOX8,HOXC11,NR2E1,OPRM1,PAX6,DMRT2,PARVA,TBX18,HMG20B,WNT2B,SIX1,TP73,ALX1,MMP9,DMRTA2,GATA5,EMX1,TUBB2B,TBX20
query_1	GO:0045597	positive regulation of cell differentiation	914	16	GO:BP	0.00410083	HIF1A,INSM1,FOXG1,DLX1,ATOH1,FEZF1,SHOX2,SOX8,OPRM1,PAX6,HMG20B,TP73,ALX1,DMRTA2,GATA5,TUBB2B
query_1	GO:0061213	positive regulation of mesonephros development	20	3	GO:BP	0.00418703	SOX8,WNT2B,SIX1
query_1	HP:0030044	Flexion contracture of digit	221	8	HP	0.00425873	ALX3,SATB2,TBX15,FOXG1,TBR1,MAFB,ALX1,PAX3
query_1	HP:0002060	Abnormality of the cerebrum	1313	21	HP	0.00425873	TRAPPC9,ALX3,SATB2,ZIC1,ZIC2,TBX15,FOXG1,TBR1,MAFB,PAX6,HIC1,BRF1,SIX1,LHX4,ALX1,PAX3,SIM1,CNTNAP2,RNF216,TUBB2B,TRIM36
query_1	GO:0060485	mesenchyme development	260	8	GO:BP	0.00441602	HIF1A,PITX2,HAND1,SOX8,SIX1,ALX1,GATA5,TBX20
query_1	GO:0005654	nucleoplasm	3436	38	GO:CC	0.00450294	EVX1,HIF1A,SATB2,PITX2,ZIC1,EXOSC2,ZIC2,INSM1,TBX15,ESRRG,FOXG1,HAND1,FEZF1,HOXC4,GFI1,FEV,FOXL2,HOXC11,NR2E1,PAX6,CDK20,BNC1,HIC1,BRF1,ONECUT2,TBX18,HMG20B,SIX1,TP73,ALX1,TCF7,PAX3,GATA5,NECAB1,RNF216,TRIM45,JPH1,MYBL2
query_1	GO:0005575	cellular_component	15056	107	GO:CC	0.00451897	SDCCAG8,EVX1,HIF1A,TRAPPC9,EPHX3,ALX3,SATB2,CDS1,PITX2,NKX2-4,ZIC1,DSC3,EXOSC2,ZIC2,BSX,INSM1,TBX15,ESRRG,FOXG1,ZIC4,HSPBP1,MT1A,GAD2,ZNF518A,SYNGR3,DLX1,ATOH1,HAND1,SLC26A5,OLIG3,FEZF1,TBR1,PPP1R14A,MYO3A,HOXC4,GFI1,SHOX2,FEV,MAFB,FOXL2,SOX8,DUPD1,HOXC11,NR2E1,SLC15A3,RNF175,OPRM1,PAX6,IL4I1,OTX1,DMRT2,GJD2,CLVS2,CDK20,BNC1,PARVA,HIC1,GPR62,BRF1,ONECUT2,EVX2,TBX18,ZIC5,GDAP1,HMG20B,WNT2B,NBEA,DH…
query_1	GO:0035295	tube development	1021	17	GO:BP	0.00459355	SDCCAG8,HIF1A,HAND1,TBR1,SHOX2,SOX8,NR2E1,PAX6,PARVA,TBX18,WNT2B,SIX1,ALX1,TCF7,GATA5,SIM1,TBX20
query_1	GO:0061448	connective tissue development	262	8	GO:BP	0.00459777	HIF1A,SATB2,HAND1,HOXC4,SHOX2,SOX8,WNT2B,ALX1
query_1	HP:0004209	Clinodactyly of the 5th finger	225	8	HP	0.00469056	TRAPPC9,SATB2,TBX15,FOXG1,HIC1,GATA5,SIM1,RNF216
query_1	GO:0090189	regulation of branching involved in ureteric bud morphogenesis	21	3	GO:BP	0.0047549	SOX8,WNT2B,SIX1
query_1	GO:0090183	regulation of kidney development	51	4	GO:BP	0.00484568	SOX8,WNT2B,SIX1,MMP9
query_1	HP:0009179	Deviation of the 5th finger	227	8	HP	0.00486196	TRAPPC9,SATB2,TBX15,FOXG1,HIC1,GATA5,SIM1,RNF216
query_1	HP:0000486	Strabismus	675	14	HP	0.00488282	ALX3,SATB2,PITX2,ZIC1,EXOSC2,ZIC2,TBX15,MAFB,FOXL2,PAX6,PAX3,SIM1,CNTNAP2,TUBB2B
query_1	GO:0035107	appendage morphogenesis	143	6	GO:BP	0.00489016	ALX3,SHOX2,HOXC11,EVX2,ALX1,SALL3
query_1	GO:0051216	cartilage development	201	7	GO:BP	0.00489016	HIF1A,SATB2,HAND1,HOXC4,SHOX2,WNT2B,ALX1
query_1	GO:0035108	limb morphogenesis	143	6	GO:BP	0.00489016	ALX3,SHOX2,HOXC11,EVX2,ALX1,SALL3
query_1	HP:0006866	Midline central nervous system lipomas	3	2	HP	0.00489048	ALX3,ALX1
query_1	HP:0000598	Abnormality of the ear	1553	23	HP	0.00518839	SDCCAG8,TRAPPC9,ALX3,SATB2,PITX2,ZIC1,EXOSC2,ZIC2,TBX15,FOXG1,SLC26A5,FEZF1,TBR1,MYO3A,MAFB,FOXL2,PAX6,BRF1,SIX1,ALX1,PAX3,SIM1,CNTNAP2
query_1	HP:0012443	Abnormality of brain morphology	1765	25	HP	0.00518839	TRAPPC9,ALX3,SATB2,PITX2,ZIC1,EXOSC2,ZIC2,TBX15,FOXG1,FEZF1,TBR1,MAFB,FOXL2,PAX6,HIC1,BRF1,SIX1,LHX4,ALX1,PAX3,SIM1,CNTNAP2,RNF216,TUBB2B,TRIM36
query_1	GO:0140297	DNA-binding transcription factor binding	340	9	GO:MF	0.00540881	HIF1A,PITX2,TBX15,HAND1,TBR1,HOXC4,FOXL2,TBX18,TBX20
query_1	GO:0007519	skeletal muscle tissue development	146	6	GO:BP	0.00543533	SHOX2,FOXL2,SOX8,HMG20B,SIX1,DMRTA2
query_1	GO:0001755	neural crest cell migration	53	4	GO:BP	0.00547207	HIF1A,PITX2,SOX8,ALX1
query_1	GO:0035148	tube formation	147	6	GO:BP	0.00554799	SDCCAG8,HIF1A,HAND1,SOX8,SIX1,ALX1
query_1	GO:0048592	eye morphogenesis	147	6	GO:BP	0.00554799	HIF1A,PITX2,FOXL2,SOX8,PAX6,WNT2B
query_1	GO:0008152	metabolic process	9804	81	GO:BP	0.00556257	EVX1,HIF1A,TRAPPC9,EPHX3,ALX3,SATB2,CDS1,PITX2,NKX2-4,ZIC1,EXOSC2,ZIC2,BSX,INSM1,TBX15,ESRRG,FOXG1,ZIC4,HSPBP1,GAD2,ZNF518A,DLX1,ATOH1,HAND1,OLIG3,FEZF1,TBR1,PPP1R14A,MYO3A,HOXC4,GFI1,SHOX2,FEV,MAFB,FOXL2,SOX8,DUPD1,HOXC11,NR2E1,RNF175,OPRM1,PAX6,IL4I1,OTX1,DMRT2,CDK20,BNC1,HIC1,BRF1,ONECUT2,EVX2,TBX18,ZIC5,HMG20B,DHX40,SIX1,KLF14,TP73,ELOVL2,SOX21,P4HA3,LHX4,ALX1,MMP9,TCF7,DMRTA2,PAX3,GATA5,SIM1…
query_1	GO:0021764	amygdala development	5	2	GO:BP	0.00566776	TBR1,NR2E1
query_1	GO:0021523	somatic motor neuron differentiation	5	2	GO:BP	0.00566776	PAX6,LHX4
query_1	GO:0060688	regulation of morphogenesis of a branching structure	54	4	GO:BP	0.00569853	SHOX2,SOX8,WNT2B,SIX1
query_1	HP:0000384	Preauricular skin tag	42	4	HP	0.00572947	ALX3,MAFB,SIX1,ALX1
query_1	HP:0009473	Joint contracture of the hand	178	7	HP	0.00583216	ALX3,TBX15,FOXG1,TBR1,MAFB,ALX1,PAX3
query_1	GO:0021895	cerebral cortex neuron differentiation	23	3	GO:BP	0.00585367	DLX1,NR2E1,EMX1
query_1	GO:0045665	negative regulation of neuron differentiation	209	7	GO:BP	0.00586036	FOXG1,DLX1,GFI1,SOX8,NR2E1,PAX6,TP73
query_1	HP:0000549	Abnormal conjugate eye movement	700	14	HP	0.0059677	ALX3,SATB2,PITX2,ZIC1,EXOSC2,ZIC2,TBX15,MAFB,FOXL2,PAX6,PAX3,SIM1,CNTNAP2,TUBB2B
query_1	HP:0000177	Abnormality of upper lip	531	12	HP	0.0059677	TRAPPC9,ALX3,SATB2,PITX2,EXOSC2,ZIC2,FOXG1,TBR1,HIC1,LHX4,PAX3,CNTNAP2
query_1	HP:0000356	Abnormality of the outer ear	788	15	HP	0.0059677	SDCCAG8,TRAPPC9,ALX3,SATB2,EXOSC2,ZIC2,TBX15,FOXG1,TBR1,MAFB,FOXL2,BRF1,SIX1,ALX1,SIM1
query_1	HP:0000309	Abnormality of the midface	380	10	HP	0.00614058	ALX3,SATB2,PITX2,ZIC1,MAFB,SIX1,ALX1,PAX3,GATA5,SIM1
query_1	HP:0000366	Abnormality of the nose	1180	19	HP	0.00658052	SDCCAG8,TRAPPC9,ALX3,SATB2,PITX2,EXOSC2,ZIC2,FOXG1,FEZF1,GFI1,MAFB,FOXL2,HIC1,LHX4,ALX1,PAX3,GATA5,SIM1,CNTNAP2
query_1	GO:0061217	regulation of mesonephros development	24	3	GO:BP	0.00659069	SOX8,WNT2B,SIX1
query_1	GO:0072001	renal system development	281	8	GO:BP	0.00669692	SOX8,HOXC11,TBX18,WNT2B,SIX1,TP73,MMP9,SIM1
query_1	HP:0009553	Abnormality of the hairline	131	6	HP	0.00676539	ALX3,ZIC1,TBX15,MAFB,ALX1,CNTNAP2
query_1	HP:0002011	Morphological abnormality of the central nervous system	1930	26	HP	0.00677832	TRAPPC9,ALX3,SATB2,PITX2,ZIC1,EXOSC2,ZIC2,TBX15,FOXG1,FEZF1,TBR1,MAFB,FOXL2,PAX6,HIC1,BRF1,GDAP1,SIX1,LHX4,ALX1,PAX3,SIM1,CNTNAP2,RNF216,TUBB2B,TRIM36
query_1	GO:0060538	skeletal muscle organ development	154	6	GO:BP	0.00678254	SHOX2,FOXL2,SOX8,HMG20B,SIX1,DMRTA2
query_1	GO:0045595	regulation of cell differentiation	1699	23	GO:BP	0.00678417	HIF1A,INSM1,FOXG1,DLX1,ATOH1,FEZF1,TBR1,GFI1,SHOX2,MAFB,SOX8,NR2E1,OPRM1,PAX6,HMG20B,SIX1,TP73,ALX1,MMP9,DMRTA2,GATA5,EMX1,TUBB2B
query_1	HP:0002977	Aplasia/Hypoplasia involving the central nervous system	1195	19	HP	0.00704263	TRAPPC9,ALX3,SATB2,ZIC1,ZIC2,TBX15,FOXG1,MAFB,PAX6,HIC1,BRF1,LHX4,ALX1,PAX3,SIM1,CNTNAP2,RNF216,TUBB2B,TRIM36
query_1	HP:0009121	Abnormal axial skeleton morphology	1829	25	HP	0.00704263	SDCCAG8,TRAPPC9,ALX3,SATB2,PITX2,ZIC1,ZIC2,TBX15,FOXG1,TBR1,MAFB,PAX6,HIC1,BRF1,GDAP1,SIX1,LHX4,ALX1,PAX3,GATA5,SIM1,CNTNAP2,RNF216,JPH1,TUBB2B
query_1	HP:0000606	Abnormality of the periorbital region	133	6	HP	0.00704263	TRAPPC9,PITX2,ZIC1,FOXG1,GATA5,CNTNAP2
query_1	HP:0100251	Multiple central nervous system lipomas	4	2	HP	0.00717631	ALX3,ALX1
query_1	GO:0090571	RNA polymerase II transcription repressor complex	6	2	GO:CC	0.00733343	TBX15,TBX18
query_1	HP:0000925	Abnormality of the vertebral column	1007	17	HP	0.00753025	SDCCAG8,TRAPPC9,ALX3,ZIC1,ZIC2,TBX15,FOXG1,TBR1,MAFB,PAX6,HIC1,BRF1,GDAP1,LHX4,PAX3,CNTNAP2,JPH1
query_1	HP:0007364	Aplasia/Hypoplasia of the cerebrum	1010	17	HP	0.00766485	TRAPPC9,ALX3,SATB2,ZIC1,ZIC2,TBX15,FOXG1,MAFB,PAX6,HIC1,BRF1,LHX4,ALX1,PAX3,SIM1,TUBB2B,TRIM36
query_1	HP:0000271	Abnormality of the face	2076	27	HP	0.00771053	SDCCAG8,TRAPPC9,ALX3,SATB2,PITX2,ZIC1,DSC3,EXOSC2,ZIC2,TBX15,FOXG1,FEZF1,TBR1,GFI1,MAFB,FOXL2,PAX6,HIC1,BRF1,SIX1,LHX4,ALX1,PAX3,GATA5,SIM1,CNTNAP2,TUBB2B
query_1	HP:0000581	Blepharophimosis	89	5	HP	0.00771053	TBX15,FOXG1,MAFB,FOXL2,PAX3
query_1	GO:0007405	neuroblast proliferation	60	4	GO:BP	0.00823055	HIF1A,FOXG1,PAX6,DMRTA2
query_1	GO:0030855	epithelial cell differentiation	702	13	GO:BP	0.00834942	HIF1A,PITX2,DSC3,INSM1,ATOH1,FOXL2,SOX8,PAX6,ONECUT2,SIX1,MMP9,GATA5,EMX1
query_1	HP:0001156	Brachydactyly	263	8	HP	0.00840966	ALX3,ZIC1,EXOSC2,TBX15,MAFB,ALX1,PAX3,GATA5
query_1	HP:0100490	Camptodactyly of finger	141	6	HP	0.00840966	ALX3,FOXG1,TBR1,MAFB,ALX1,PAX3
query_1	GO:0061061	muscle structure development	614	12	GO:BP	0.00847684	HAND1,SHOX2,FOXL2,SOX8,HMG20B,SIX1,TP73,DMRTA2,PAX3,JPH1,MYEF2,TBX20
query_1	HP:0001220	Interphalangeal joint contracture of finger	143	6	HP	0.00881977	ALX3,FOXG1,TBR1,MAFB,ALX1,PAX3
query_1	HP:0011361	Congenital abnormal hair pattern	144	6	HP	0.00901427	ALX3,ZIC1,TBX15,MAFB,ALX1,CNTNAP2
query_1	HP:0000327	Hypoplasia of the maxilla	94	5	HP	0.00904764	ALX3,PITX2,MAFB,ALX1,PAX3
query_1	HP:0001274	Agenesis of corpus callosum	203	7	HP	0.00904764	ALX3,ZIC1,ZIC2,FOXG1,LHX4,ALX1,TUBB2B
query_1	HP:0000402	Stenosis of the external auditory canal	22	3	HP	0.00910156	TBX15,MAFB,SIX1
query_1	HP:0012639	Abnormality of nervous system morphology	2114	27	HP	0.00911007	TRAPPC9,ALX3,SATB2,PITX2,ZIC1,EXOSC2,ZIC2,TBX15,FOXG1,FEZF1,TBR1,MAFB,FOXL2,PAX6,HIC1,BRF1,GDAP1,SIX1,LHX4,ALX1,PAX3,SIM1,CNTNAP2,RNF216,JPH1,TUBB2B,TRIM36
query_1	HP:0001466	Contiguous gene syndrome	5	2	HP	0.00969778	PAX6,PAX3
query_1	HP:0100360	Contractures of the joints of the upper limbs	209	7	HP	0.0100398	ALX3,TBX15,FOXG1,TBR1,MAFB,ALX1,PAX3
query_1	HP:0100886	Abnormality of globe location	676	13	HP	0.0100615	TRAPPC9,ALX3,PITX2,ZIC1,EXOSC2,ZIC2,TBX15,TBR1,MAFB,ALX1,PAX3,GATA5,SIM1
query_1	HP:0006261	Abnormal phalangeal joint morphology of the hand	150	6	HP	0.0100615	ALX3,FOXG1,TBR1,MAFB,ALX1,PAX3
query_1	GO:0007368	determination of left/right symmetry	111	5	GO:BP	0.0102445	HIF1A,PITX2,HAND1,TBR1,TBX20
query_1	GO:0001947	heart looping	64	4	GO:BP	0.0103073	HIF1A,HAND1,TBR1,TBX20
query_1	GO:0010605	negative regulation of macromolecule metabolic process	2582	30	GO:BP	0.010733	HIF1A,SATB2,EXOSC2,ZIC2,INSM1,TBX15,FOXG1,DLX1,HAND1,OLIG3,FEZF1,TBR1,PPP1R14A,GFI1,FEV,FOXL2,SOX8,NR2E1,PAX6,HIC1,TBX18,HMG20B,SIX1,ALX1,MMP9,TCF7,GATA5,EMX1,MYEF2,TBX20
query_1	GO:0043010	camera-type eye development	304	8	GO:BP	0.010733	HIF1A,PITX2,DLX1,FOXL2,SOX8,NR2E1,PAX6,WNT2B
query_1	HP:0004426	Abnormality of the cheek	153	6	HP	0.0107895	ALX3,MAFB,SIX1,ALX1,GATA5,SIM1
query_1	HP:0011339	Abnormality of upper lip vermillion	213	7	HP	0.0107895	TRAPPC9,PITX2,EXOSC2,ZIC2,FOXG1,PAX3,CNTNAP2
query_1	HP:0100037	Abnormality of the scalp hair	214	7	HP	0.0108035	ALX3,ZIC1,DSC3,TBX15,MAFB,ALX1,CNTNAP2
query_1	HP:0012785	Flexion contracture of finger	154	6	HP	0.0108782	ALX3,FOXG1,TBR1,MAFB,ALX1,PAX3
query_1	GO:0003310	pancreatic A cell differentiation	7	2	GO:BP	0.0109501	INSM1,PAX6
query_1	HP:0000422	Abnormality of the nasal bridge	687	13	HP	0.0109641	SDCCAG8,TRAPPC9,ALX3,SATB2,PITX2,ZIC2,FOXG1,MAFB,FOXL2,ALX1,PAX3,SIM1,CNTNAP2
query_1	HP:0010609	Skin tags	58	4	HP	0.0112505	ALX3,MAFB,SIX1,ALX1
query_1	HP:0002683	Abnormality of the calvaria	690	13	HP	0.0112505	TRAPPC9,SATB2,ZIC1,ZIC2,TBX15,FOXG1,MAFB,LHX4,ALX1,GATA5,SIM1,CNTNAP2,RNF216
query_1	HP:0009890	High anterior hairline	25	3	HP	0.0112505	ALX3,ALX1,CNTNAP2
query_1	GO:0051239	regulation of multicellular organismal process	2962	33	GO:BP	0.0112874	HIF1A,ESRRG,FOXG1,DLX1,ATOH1,FEZF1,TBR1,GFI1,SHOX2,MAFB,FOXL2,SOX8,HOXC11,NR2E1,OPRM1,PAX6,DMRT2,TBX18,HMG20B,WNT2B,SIX1,TP73,GLRA1,ALX1,CACNA2D1,MMP9,DMRTA2,GATA5,EMX1,RNF216,TUBB2B,TBX20,KCNJ12
query_1	GO:0035914	skeletal muscle cell differentiation	66	4	GO:BP	0.0113002	SOX8,HMG20B,SIX1,DMRTA2
query_1	HP:0000234	Abnormality of the head	2284	28	HP	0.0113405	SDCCAG8,TRAPPC9,ALX3,SATB2,PITX2,ZIC1,DSC3,EXOSC2,ZIC2,TBX15,FOXG1,FEZF1,TBR1,GFI1,MAFB,FOXL2,PAX6,HIC1,BRF1,SIX1,LHX4,ALX1,PAX3,GATA5,SIM1,CNTNAP2,RNF216,TUBB2B
query_1	HP:0000152	Abnormality of head or neck	2301	28	HP	0.0115163	SDCCAG8,TRAPPC9,ALX3,SATB2,PITX2,ZIC1,DSC3,EXOSC2,ZIC2,TBX15,FOXG1,FEZF1,TBR1,GFI1,MAFB,FOXL2,PAX6,HIC1,BRF1,SIX1,LHX4,ALX1,PAX3,GATA5,SIM1,CNTNAP2,RNF216,TUBB2B
query_1	HP:0011483	Anterior synechiae of the anterior chamber	6	2	HP	0.0115163	PITX2,PAX6
query_1	HP:0003450	Axonal regeneration	6	2	HP	0.0115163	GDAP1,JPH1
query_1	HP:0007676	Hypoplasia of the iris	26	3	HP	0.0115163	PITX2,MAFB,PAX3
query_1	HP:0000290	Abnormality of the forehead	697	13	HP	0.0115163	TRAPPC9,ALX3,SATB2,PITX2,ZIC1,EXOSC2,ZIC2,TBX15,FOXG1,HIC1,ALX1,GATA5,CNTNAP2
query_1	HP:0031159	Thinning of Descemet membrane	6	2	HP	0.0115163	PITX2,PAX6
query_1	HP:0010720	Abnormal hair pattern	158	6	HP	0.0115163	ALX3,ZIC1,TBX15,MAFB,ALX1,CNTNAP2
query_1	HP:0001965	Abnormality of the scalp	221	7	HP	0.0115163	ALX3,ZIC1,DSC3,TBX15,MAFB,ALX1,CNTNAP2
query_1	HP:0031703	Abnormal ear morphology	1398	20	HP	0.0115163	SDCCAG8,TRAPPC9,ALX3,SATB2,ZIC1,EXOSC2,ZIC2,TBX15,FOXG1,SLC26A5,FEZF1,TBR1,MYO3A,MAFB,FOXL2,BRF1,SIX1,ALX1,PAX3,SIM1
query_1	HP:0000326	Abnormality of the maxilla	107	5	HP	0.011936	ALX3,PITX2,MAFB,ALX1,PAX3
query_1	GO:0048666	neuron development	1025	16	GO:BP	0.0119884	INSM1,FOXG1,ATOH1,FEZF1,TBR1,GFI1,SHOX2,FEV,NR2E1,PAX6,ONECUT2,LHX4,CNTNAP2,EMX1,TUBB2B,SALL3
query_1	GO:0048593	camera-type eye morphogenesis	117	5	GO:BP	0.0124964	HIF1A,PITX2,SOX8,PAX6,WNT2B
query_1	GO:0061371	determination of heart left/right asymmetry	69	4	GO:BP	0.0131655	HIF1A,HAND1,TBR1,TBX20
query_1	HP:0000506	Telecanthus	110	5	HP	0.0133861	PITX2,MAFB,FOXL2,PAX3,CNTNAP2
query_1	GO:0009855	determination of bilateral symmetry	120	5	GO:BP	0.0137376	HIF1A,PITX2,HAND1,TBR1,TBX20
query_1	GO:0014013	regulation of gliogenesis	120	5	GO:BP	0.0137376	DLX1,SOX8,NR2E1,TP73,EMX1
query_1	GO:0003143	embryonic heart tube morphogenesis	70	4	GO:BP	0.0137376	HIF1A,HAND1,TBR1,TBX20
query_1	GO:0048664	neuron fate determination	8	2	GO:BP	0.0137451	FOXG1,ATOH1
query_1	GO:0001655	urogenital system development	319	8	GO:BP	0.0137451	SOX8,HOXC11,TBX18,WNT2B,SIX1,TP73,MMP9,SIM1
query_1	GO:0046533	negative regulation of photoreceptor cell differentiation	8	2	GO:BP	0.0137451	DLX1,SOX8
query_1	GO:0046532	regulation of photoreceptor cell differentiation	8	2	GO:BP	0.0137451	DLX1,SOX8
query_1	GO:0051172	negative regulation of nitrogen compound metabolic process	2152	26	GO:BP	0.0138038	SATB2,ZIC2,INSM1,TBX15,FOXG1,DLX1,HAND1,OLIG3,FEZF1,TBR1,PPP1R14A,GFI1,FEV,FOXL2,SOX8,NR2E1,PAX6,HIC1,TBX18,HMG20B,SIX1,ALX1,MMP9,TCF7,EMX1,TBX20
query_1	GO:0009799	specification of symmetry	121	5	GO:BP	0.0138038	HIF1A,PITX2,HAND1,TBR1,TBX20
query_1	GO:0021772	olfactory bulb development	32	3	GO:BP	0.0138038	FEZF1,NR2E1,SALL3
query_1	GO:0060562	epithelial tube morphogenesis	320	8	GO:BP	0.0138038	HIF1A,HAND1,TBR1,SOX8,WNT2B,SIX1,ALX1,TBX20
query_1	GO:0016477	cell migration	1360	19	GO:BP	0.0138177	SDCCAG8,HIF1A,SATB2,PITX2,INSM1,FOXG1,ATOH1,OLIG3,FEZF1,SOX8,NR2E1,PAX6,PARVA,ONECUT2,SIX1,ALX1,MMP9,TUBB2B,TBX20
query_1	HP:0001574	Abnormality of the integument	1868	24	HP	0.0138387	SDCCAG8,TRAPPC9,ALX3,SATB2,PITX2,ZIC1,DSC3,EXOSC2,ZIC2,TBX15,FOXG1,FEZF1,GFI1,MAFB,FOXL2,PAX6,HIC1,BRF1,SIX1,LHX4,ALX1,PAX3,GATA5,CNTNAP2
query_1	HP:0000118	Phenotypic abnormality	3713	39	HP	0.0138387	SDCCAG8,TRAPPC9,ALX3,SATB2,PITX2,ZIC1,DSC3,EXOSC2,ZIC2,TBX15,FOXG1,SLC26A5,FEZF1,TBR1,MYO3A,GFI1,MAFB,FOXL2,PAX6,HIC1,BRF1,TBX18,GDAP1,WNT2B,SIX1,GLRA1,LHX4,ALX1,CACNA2D1,MMP9,PAX3,GATA5,SIM1,CNTNAP2,RNF216,JPH1,TUBB2B,TBX20,TRIM36
query_1	HP:0200007	Abnormal size of the palpebral fissures	168	6	HP	0.0138387	EXOSC2,TBX15,FOXG1,MAFB,FOXL2,PAX3
query_1	HP:0000001	HP root	3717	39	HP	0.0139994	SDCCAG8,TRAPPC9,ALX3,SATB2,PITX2,ZIC1,DSC3,EXOSC2,ZIC2,TBX15,FOXG1,SLC26A5,FEZF1,TBR1,MYO3A,GFI1,MAFB,FOXL2,PAX6,HIC1,BRF1,TBX18,GDAP1,WNT2B,SIX1,GLRA1,LHX4,ALX1,CACNA2D1,MMP9,PAX3,GATA5,SIM1,CNTNAP2,RNF216,JPH1,TUBB2B,TBX20,TRIM36
query_1	HP:0005258	Pectoral muscle hypoplasia/aplasia	7	2	HP	0.0141346	ALX3,ALX1
query_1	HP:0007833	Anterior chamber synechiae	7	2	HP	0.0141346	PITX2,PAX6
query_1	HP:0000349	Widow's peak	7	2	HP	0.0141346	ALX3,ALX1
query_1	GO:0009987	cellular process	13358	99	GO:BP	0.0142558	SDCCAG8,EVX1,HIF1A,TRAPPC9,EPHX3,ALX3,SATB2,CDS1,PITX2,NKX2-4,ZIC1,DSC3,EXOSC2,ZIC2,BSX,INSM1,TBX15,ESRRG,FOXG1,ZIC4,HSPBP1,MT1A,GAD2,ZNF518A,SYNGR3,DLX1,ATOH1,HAND1,SLC26A5,OLIG3,FEZF1,TBR1,PPP1R14A,MYO3A,HOXC4,GFI1,SHOX2,FEV,MAFB,FOXL2,SOX8,DUPD1,HOXC11,NR2E1,RNF175,OPRM1,PAX6,IL4I1,OTX1,DMRT2,GJD2,CLVS2,CDK20,BNC1,PARVA,HIC1,GPR62,BRF1,ONECUT2,EVX2,TBX18,ZIC5,GDAP1,HMG20B,WNT2B,DHX40,SIX1,KLF1…
query_1	GO:0040011	locomotion	1697	22	GO:BP	0.0143652	SDCCAG8,HIF1A,SATB2,PITX2,INSM1,FOXG1,ATOH1,SLC26A5,OLIG3,FEZF1,TBR1,SOX8,NR2E1,PAX6,PARVA,ONECUT2,SIX1,LHX4,ALX1,MMP9,TUBB2B,TBX20
query_1	GO:1905332	positive regulation of morphogenesis of an epithelium	33	3	GO:BP	0.0147107	SOX8,WNT2B,SIX1
query_1	HP:0000288	Abnormality of the philtrum	385	9	HP	0.0150136	TRAPPC9,SATB2,PITX2,EXOSC2,ZIC2,FOXG1,TBR1,PAX3,CNTNAP2
query_1	GO:0021536	diencephalon development	73	4	GO:BP	0.0151137	PITX2,PAX6,OTX1,CNTNAP2
query_1	GO:0001838	embryonic epithelial tube formation	125	5	GO:BP	0.015475	HIF1A,HAND1,SOX8,SIX1,ALX1
query_1	GO:0048870	cell motility	1487	20	GO:BP	0.0155917	SDCCAG8,HIF1A,SATB2,PITX2,INSM1,FOXG1,ATOH1,SLC26A5,OLIG3,FEZF1,SOX8,NR2E1,PAX6,PARVA,ONECUT2,SIX1,ALX1,MMP9,TUBB2B,TBX20
query_1	GO:0051674	localization of cell	1487	20	GO:BP	0.0155917	SDCCAG8,HIF1A,SATB2,PITX2,INSM1,FOXG1,ATOH1,SLC26A5,OLIG3,FEZF1,SOX8,NR2E1,PAX6,PARVA,ONECUT2,SIX1,ALX1,MMP9,TUBB2B,TBX20
query_1	GO:0021988	olfactory lobe development	34	3	GO:BP	0.0157137	FEZF1,NR2E1,SALL3
query_1	HP:0001999	Abnormal facial shape	738	13	HP	0.0162658	TRAPPC9,SATB2,PITX2,ZIC1,ZIC2,TBX15,TBR1,MAFB,SIX1,LHX4,PAX3,SIM1,CNTNAP2
query_1	GO:0003206	cardiac chamber morphogenesis	127	5	GO:BP	0.0163199	HIF1A,HAND1,SHOX2,PARVA,TBX20
query_1	GO:0061303	cornea development in camera-type eye	9	2	GO:BP	0.0164739	PAX6,WNT2B
query_1	HP:0000174	Abnormal palate morphology	741	13	HP	0.0167138	ALX3,SATB2,ZIC2,TBX15,FEZF1,TBR1,MAFB,FOXL2,SIX1,LHX4,ALX1,PAX3,SIM1
query_1	GO:0040019	positive regulation of embryonic development	35	3	GO:BP	0.0168884	DMRT2,WNT2B,SIX1
query_1	HP:0040075	Hypopituitarism	119	5	HP	0.017056	ALX3,PITX2,ZIC2,FEZF1,LHX4
query_1	GO:0035270	endocrine system development	129	5	GO:BP	0.0172666	PITX2,INSM1,PAX6,ONECUT2,SIX1
query_1	HP:0100538	Abnormality of the supraorbital ridges	70	4	HP	0.0174912	TRAPPC9,PITX2,ZIC1,GATA5
query_1	GO:0031324	negative regulation of cellular metabolic process	2318	27	GO:BP	0.0176896	HIF1A,SATB2,ZIC2,INSM1,TBX15,FOXG1,DLX1,HAND1,OLIG3,FEZF1,TBR1,PPP1R14A,GFI1,FEV,FOXL2,SOX8,NR2E1,PAX6,HIC1,TBX18,HMG20B,SIX1,ALX1,MMP9,TCF7,EMX1,TBX20
query_1	HP:0011803	Bifid nose	8	2	HP	0.0177037	ALX3,ALX1
query_1	GO:0035050	embryonic heart tube development	78	4	GO:BP	0.018435	HIF1A,HAND1,TBR1,TBX20
query_1	GO:0014032	neural crest cell development	78	4	GO:BP	0.018435	HIF1A,PITX2,SOX8,ALX1
query_1	HP:0001510	Growth delay	1256	18	HP	0.0185009	SDCCAG8,SATB2,PITX2,EXOSC2,ZIC2,TBX15,FOXG1,FEZF1,TBR1,PAX6,HIC1,BRF1,LHX4,MMP9,GATA5,SIM1,RNF216,TUBB2B
query_1	GO:0072175	epithelial tube formation	132	5	GO:BP	0.0187918	HIF1A,HAND1,SOX8,SIX1,ALX1
query_1	GO:0017053	transcriptional repressor complex	78	4	GO:CC	0.0189954	INSM1,TBX15,GFI1,TBX18
query_1	HP:0000364	Hearing abnormality	1054	16	HP	0.0192996	SDCCAG8,ALX3,PITX2,ZIC1,EXOSC2,TBX15,FOXG1,SLC26A5,FEZF1,MYO3A,MAFB,PAX6,SIX1,ALX1,PAX3,CNTNAP2
query_1	HP:0031704	Abnormal ear physiology	1054	16	HP	0.0192996	SDCCAG8,ALX3,PITX2,ZIC1,EXOSC2,TBX15,FOXG1,SLC26A5,FEZF1,MYO3A,MAFB,PAX6,SIX1,ALX1,PAX3,CNTNAP2
query_1	GO:0090184	positive regulation of kidney development	37	3	GO:BP	0.0193271	SOX8,WNT2B,SIX1
query_1	GO:0007411	axon guidance	266	7	GO:BP	0.0193271	FOXG1,ATOH1,FEZF1,TBR1,PAX6,LHX4,TUBB2B
query_1	GO:0001654	eye development	344	8	GO:BP	0.0199503	HIF1A,PITX2,DLX1,FOXL2,SOX8,NR2E1,PAX6,WNT2B
query_1	HP:0000496	Abnormality of eye movement	1162	17	HP	0.0199699	SDCCAG8,ALX3,SATB2,PITX2,ZIC1,EXOSC2,ZIC2,TBX15,FEZF1,MAFB,FOXL2,PAX6,PAX3,SIM1,CNTNAP2,RNF216,TUBB2B
query_1	GO:0097485	neuron projection guidance	268	7	GO:BP	0.0200008	FOXG1,ATOH1,FEZF1,TBR1,PAX6,LHX4,TUBB2B
query_2	REAC:R-HSA-68886	M Phase	341	2	REAC	0.020518	PRKCA,NCAPD3
query_2	REAC:R-HSA-68875	Mitotic Prophase	120	2	REAC	0.020518	PRKCA,NCAPD3
query_1	GO:0150063	visual system development	348	8	GO:BP	0.0211816	HIF1A,PITX2,DLX1,FOXL2,SOX8,NR2E1,PAX6,WNT2B
query_1	GO:0001822	kidney development	271	7	GO:BP	0.0211816	SOX8,HOXC11,WNT2B,SIX1,TP73,MMP9,SIM1
query_1	HP:0002057	Prominent glabella	9	2	HP	0.0212611	ALX1,CNTNAP2
query_1	HP:0011490	Abnormal Descemet membrane morphology	9	2	HP	0.0212611	PITX2,PAX6
query_1	HP:0007370	Aplasia/Hypoplasia of the corpus callosum	495	10	HP	0.0212611	TRAPPC9,ALX3,ZIC1,ZIC2,FOXG1,PAX6,HIC1,LHX4,ALX1,TUBB2B
query_1	GO:0048864	stem cell development	82	4	GO:BP	0.0213588	HIF1A,PITX2,SOX8,ALX1
query_1	GO:0014031	mesenchymal cell development	82	4	GO:BP	0.0213588	HIF1A,PITX2,SOX8,ALX1
query_1	HP:0002307	Drooling	35	3	HP	0.0216851	FOXG1,CNTNAP2,TUBB2B
query_1	HP:0000568	Microphthalmia	190	6	HP	0.0216851	ALX3,TBX15,TBR1,FOXL2,PAX6,ALX1
query_1	GO:0007601	visual perception	202	6	GO:BP	0.0218195	ZIC2,MYO3A,NR2E1,PAX6,GJD2,GLRA1
query_1	GO:0035136	forelimb morphogenesis	39	3	GO:BP	0.0218195	ALX3,SHOX2,SALL3
query_1	HP:0000005	Mode of inheritance	3445	36	HP	0.0218894	SDCCAG8,TRAPPC9,ALX3,SATB2,PITX2,ZIC1,DSC3,EXOSC2,ZIC2,TBX15,FOXG1,SLC26A5,FEZF1,TBR1,MYO3A,GFI1,MAFB,FOXL2,PAX6,BRF1,TBX18,GDAP1,WNT2B,SIX1,GLRA1,LHX4,ALX1,MMP9,PAX3,GATA5,CNTNAP2,RNF216,JPH1,TUBB2B,TBX20,TRIM36
query_1	HP:0000316	Hypertelorism	500	10	HP	0.0218894	TRAPPC9,ALX3,PITX2,ZIC1,ZIC2,TBX15,TBR1,ALX1,PAX3,SIM1
query_1	HP:0002648	Abnormality of calvarial morphology	588	11	HP	0.0218894	TRAPPC9,SATB2,ZIC1,ZIC2,TBX15,MAFB,ALX1,GATA5,SIM1,CNTNAP2,RNF216
query_1	GO:0050768	negative regulation of neurogenesis	275	7	GO:BP	0.0224913	FOXG1,DLX1,GFI1,SOX8,NR2E1,PAX6,TP73
query_1	GO:0048880	sensory system development	353	8	GO:BP	0.0225958	HIF1A,PITX2,DLX1,FOXL2,SOX8,NR2E1,PAX6,WNT2B
query_1	GO:0050953	sensory perception of light stimulus	204	6	GO:BP	0.0226542	ZIC2,MYO3A,NR2E1,PAX6,GJD2,GLRA1
query_2	REAC:R-HSA-69278	Cell Cycle, Mitotic	474	2	REAC	0.0226916	PRKCA,NCAPD3
query_2	REAC:R-HSA-1640170	Cell Cycle	563	2	REAC	0.0226916	PRKCA,NCAPD3
query_1	GO:0060573	cell fate specification involved in pattern specification	11	2	GO:BP	0.0227521	EVX1,PAX6
query_1	GO:0048812	neuron projection morphogenesis	615	11	GO:BP	0.0227521	FOXG1,ATOH1,FEZF1,TBR1,SHOX2,NR2E1,PAX6,LHX4,CNTNAP2,EMX1,TUBB2B
query_1	GO:0060272	embryonic skeletal joint morphogenesis	11	2	GO:BP	0.0227521	SHOX2,HOXC11
query_1	GO:0021521	ventral spinal cord interneuron specification	11	2	GO:BP	0.0227521	EVX1,PAX6
query_1	GO:0060041	retina development in camera-type eye	141	5	GO:BP	0.0233372	HIF1A,DLX1,SOX8,NR2E1,PAX6
query_1	HP:0000864	Abnormality of the hypothalamus-pituitary axis	264	7	HP	0.0234645	ALX3,PITX2,ZIC2,FEZF1,FOXL2,LHX4,RNF216
query_1	HP:0000006	Autosomal dominant inheritance	1628	21	HP	0.0235832	SATB2,PITX2,ZIC1,ZIC2,FOXG1,FEZF1,TBR1,GFI1,MAFB,FOXL2,PAX6,TBX18,GDAP1,SIX1,GLRA1,LHX4,PAX3,GATA5,JPH1,TUBB2B,TBX20
query_1	HP:0011747	Abnormality of the anterior pituitary	196	6	HP	0.023923	ALX3,PITX2,ZIC2,FEZF1,FOXL2,LHX4
query_1	HP:0008050	Abnormality of the palpebral fissures	510	10	HP	0.023923	SDCCAG8,SATB2,EXOSC2,ZIC2,TBX15,FOXG1,TBR1,MAFB,FOXL2,PAX3
query_1	HP:0009487	Ulnar deviation of the hand	10	2	HP	0.023923	MAFB,PAX3
query_1	HP:0011488	Abnormal corneal endothelium morphology	10	2	HP	0.023923	PITX2,PAX6
query_1	HP:0002056	Abnormality of the glabella	10	2	HP	0.023923	ALX1,CNTNAP2
query_1	HP:0030791	Abnormal jaw morphology	694	12	HP	0.0242032	ALX3,SATB2,PITX2,TBX15,FOXG1,MAFB,PAX6,SIX1,ALX1,PAX3,SIM1,CNTNAP2
query_1	HP:0003319	Abnormality of the cervical spine	269	7	HP	0.024455	SDCCAG8,TRAPPC9,TBX15,TBR1,MAFB,BRF1,LHX4
query_1	HP:0000233	Thin vermilion border	199	6	HP	0.0246276	TRAPPC9,SATB2,PITX2,EXOSC2,GATA5,CNTNAP2
query_1	GO:0014033	neural crest cell differentiation	87	4	GO:BP	0.0253934	HIF1A,PITX2,SOX8,ALX1
query_1	GO:0006928	movement of cell or subcellular component	1911	23	GO:BP	0.0254278	SDCCAG8,HIF1A,SATB2,PITX2,INSM1,FOXG1,ATOH1,SLC26A5,OLIG3,FEZF1,TBR1,SOX8,NR2E1,PAX6,PARVA,ONECUT2,SIX1,LHX4,ALX1,CACNA2D1,MMP9,TUBB2B,TBX20
query_1	GO:0061629	RNA polymerase II-specific DNA-binding transcription factor binding	268	7	GO:MF	0.0254568	HIF1A,PITX2,TBX15,TBR1,FOXL2,TBX18,TBX20
query_1	HP:0000599	Abnormality of the frontal hairline	82	4	HP	0.0255852	ALX3,ZIC1,ALX1,CNTNAP2
query_1	WP:WP2064	Neural Crest Differentiation	98	5	WP	0.0256291	ZIC1,HAND1,OLIG3,ZIC5,PAX3
query_1	WP:WP2857	Mesodermal Commitment Pathway	138	6	WP	0.0256291	PITX2,ZIC2,HAND1,PAX6,ZIC5,SOX21
query_1	GO:0001709	cell fate determination	42	3	GO:BP	0.025816	FOXG1,ATOH1,PAX6
query_2	CORUM:0000000	CORUM root	3258	3	CORUM	0.0258967	PRKCA,PDIA6,NCAPD3
query_1	HP:0003121	Limb joint contracture	273	7	HP	0.0259672	ALX3,TBX15,FOXG1,TBR1,MAFB,ALX1,PAX3
query_1	GO:0120039	plasma membrane bounded cell projection morphogenesis	628	11	GO:BP	0.0262384	FOXG1,ATOH1,FEZF1,TBR1,SHOX2,NR2E1,PAX6,LHX4,CNTNAP2,EMX1,TUBB2B
query_1	GO:0007409	axonogenesis	449	9	GO:BP	0.0263592	FOXG1,ATOH1,FEZF1,TBR1,SHOX2,NR2E1,PAX6,LHX4,TUBB2B
query_1	GO:0003207	cardiac chamber formation	12	2	GO:BP	0.0263592	HAND1,TBX20
query_1	GO:0036109	alpha-linolenic acid metabolic process	12	2	GO:BP	0.0263592	ELOVL2,FADS2
query_1	GO:0042063	gliogenesis	286	7	GO:BP	0.0264363	FOXG1,DLX1,SOX8,NR2E1,PAX6,TP73,EMX1
query_1	GO:0010001	glial cell differentiation	213	6	GO:BP	0.0266279	DLX1,SOX8,NR2E1,PAX6,TP73,EMX1
query_1	GO:0048858	cell projection morphogenesis	632	11	GO:BP	0.0268363	FOXG1,ATOH1,FEZF1,TBR1,SHOX2,NR2E1,PAX6,LHX4,CNTNAP2,EMX1,TUBB2B
query_1	GO:0048483	autonomic nervous system development	43	3	GO:BP	0.0268363	INSM1,SOX8,SIX1
query_1	HP:0011493	Central opacification of the cornea	11	2	HP	0.0273637	PITX2,PAX6
query_1	HP:0003763	Bruxism	11	2	HP	0.0273637	FOXG1,CNTNAP2
query_1	HP:0009119	Aplasia/Hypoplasia of the frontal sinuses	11	2	HP	0.0273637	ALX3,ALX1
query_1	GO:0009953	dorsal/ventral pattern formation	91	4	GO:BP	0.0286779	EVX1,FOXG1,PAX6,TBX20
query_2	WP:WP3888	VEGFA-VEGFR2 Signaling	405	2	WP	0.0288755	PRKCA,PDIA6
query_1	GO:0007507	heart development	546	10	GO:BP	0.0289164	HIF1A,PITX2,HAND1,TBR1,SHOX2,PARVA,SIX1,TP73,GATA5,TBX20
query_1	HP:0000526	Aniridia	41	3	HP	0.0292246	PITX2,MAFB,PAX6
query_1	HP:0002538	Abnormality of the cerebral cortex	281	7	HP	0.0294071	TRAPPC9,FOXG1,TBR1,PAX6,HIC1,CNTNAP2,TUBB2B
query_1	GO:0009892	negative regulation of metabolic process	2799	30	GO:BP	0.0296258	HIF1A,SATB2,EXOSC2,ZIC2,INSM1,TBX15,FOXG1,DLX1,HAND1,OLIG3,FEZF1,TBR1,PPP1R14A,GFI1,FEV,FOXL2,SOX8,NR2E1,PAX6,HIC1,TBX18,HMG20B,SIX1,ALX1,MMP9,TCF7,GATA5,EMX1,MYEF2,TBX20
query_1	HP:0000929	Abnormal skull morphology	1563	20	HP	0.0297405	TRAPPC9,ALX3,SATB2,PITX2,ZIC1,ZIC2,TBX15,FOXG1,MAFB,PAX6,BRF1,SIX1,LHX4,ALX1,PAX3,GATA5,SIM1,CNTNAP2,RNF216,TUBB2B
query_1	HP:0009810	Abnormality of upper limb joint	361	8	HP	0.0297405	ALX3,ZIC1,TBX15,FOXG1,TBR1,MAFB,ALX1,PAX3
query_1	GO:0048701	embryonic cranial skeleton morphogenesis	45	3	GO:BP	0.0297703	ALX3,TBX15,SIX1
query_1	GO:0048505	regulation of timing of cell differentiation	13	2	GO:BP	0.0297703	NR2E1,PAX6
query_1	GO:0035239	tube morphogenesis	838	13	GO:BP	0.0297703	SDCCAG8,HIF1A,HAND1,TBR1,SHOX2,SOX8,NR2E1,PARVA,WNT2B,SIX1,ALX1,TCF7,TBX20
query_1	GO:0021520	spinal cord motor neuron cell fate specification	13	2	GO:BP	0.0297703	OLIG3,PAX6
query_1	HP:0003781	Excessive salivation	42	3	HP	0.0304167	FOXG1,CNTNAP2,TUBB2B
query_1	GO:0051961	negative regulation of nervous system development	296	7	GO:BP	0.0307128	FOXG1,DLX1,GFI1,SOX8,NR2E1,PAX6,TP73
query_1	GO:0003674	molecular_function	14813	105	GO:MF	0.0307802	SDCCAG8,EVX1,HIF1A,TRAPPC9,EPHX3,ALX3,SATB2,CDS1,PITX2,NKX2-4,ZIC1,DSC3,EXOSC2,ZIC2,BSX,INSM1,TBX15,ESRRG,FOXG1,ZIC4,HSPBP1,MT1A,GAD2,ZNF518A,SYNGR3,DLX1,ATOH1,HAND1,SLC26A5,OLIG3,FEZF1,TBR1,PPP1R14A,MYO3A,HOXC4,GFI1,SHOX2,FEV,MAFB,FOXL2,SOX8,DUPD1,HOXC11,NR2E1,SLC15A3,RNF175,OPRM1,PAX6,IL4I1,OTX1,DMRT2,CLVS2,CDK20,BNC1,PARVA,HIC1,GPR62,BRF1,ONECUT2,EVX2,TBX18,ZIC5,GDAP1,HMG20B,WNT2B,NBEA,DHX40,S…
query_1	HP:0002500	Abnormality of the cerebral white matter	628	11	HP	0.0308091	TRAPPC9,ALX3,ZIC1,ZIC2,FOXG1,PAX6,HIC1,LHX4,ALX1,CNTNAP2,TUBB2B
query_1	HP:0000074	Ureteropelvic junction obstruction	12	2	HP	0.0308419	TBX18,SIX1
query_1	HP:0002687	Abnormality of frontal sinus	12	2	HP	0.0308419	ALX3,ALX1
query_1	HP:0000232	Everted lower lip vermilion	89	4	HP	0.0313381	PITX2,FOXG1,MAFB,PAX6
query_1	GO:0031018	endocrine pancreas development	46	3	GO:BP	0.0314581	INSM1,PAX6,ONECUT2
query_1	GO:0032990	cell part morphogenesis	649	11	GO:BP	0.0316861	FOXG1,ATOH1,FEZF1,TBR1,SHOX2,NR2E1,PAX6,LHX4,CNTNAP2,EMX1,TUBB2B
query_1	HP:0012503	Abnormality of the pituitary gland	214	6	HP	0.0316975	ALX3,PITX2,ZIC2,FEZF1,FOXL2,LHX4
query_1	HP:0100887	Abnormality of globe size	215	6	HP	0.0317714	ALX3,TBX15,TBR1,FOXL2,PAX6,ALX1
query_1	HP:0000319	Smooth philtrum	90	4	HP	0.0317714	TRAPPC9,SATB2,FOXG1,PAX3
query_1	HP:0001273	Abnormal corpus callosum morphology	542	10	HP	0.0317714	TRAPPC9,ALX3,ZIC1,ZIC2,FOXG1,PAX6,HIC1,LHX4,ALX1,TUBB2B
query_1	HP:0005918	Abnormal finger phalanx morphology	454	9	HP	0.0318664	SDCCAG8,ALX3,SATB2,EXOSC2,FOXG1,TBR1,MAFB,ALX1,PAX3
query_1	HP:0000365	Hearing impairment	1036	15	HP	0.0320768	SDCCAG8,ALX3,PITX2,ZIC1,EXOSC2,TBX15,FOXG1,SLC26A5,FEZF1,MYO3A,MAFB,SIX1,ALX1,PAX3,CNTNAP2
query_1	GO:0048709	oligodendrocyte differentiation	95	4	GO:BP	0.0321827	DLX1,SOX8,PAX6,TP73
query_1	GO:0001657	ureteric bud development	95	4	GO:BP	0.0321827	SOX8,WNT2B,SIX1,SIM1
query_1	GO:0048729	tissue morphogenesis	653	11	GO:BP	0.0328431	HIF1A,HAND1,TBR1,SHOX2,SOX8,TBX18,WNT2B,SIX1,ALX1,GATA5,TBX20
query_1	GO:0072163	mesonephric epithelium development	96	4	GO:BP	0.0330642	SOX8,WNT2B,SIX1,SIM1
query_1	GO:0072164	mesonephric tubule development	96	4	GO:BP	0.0330642	SOX8,WNT2B,SIX1,SIM1
query_1	GO:0021781	glial cell fate commitment	14	2	GO:BP	0.0332637	SOX8,PAX6
query_1	GO:0040034	regulation of development, heterochronic	14	2	GO:BP	0.0332637	NR2E1,PAX6
query_1	GO:0072498	embryonic skeletal joint development	14	2	GO:BP	0.0332637	SHOX2,HOXC11
query_1	HP:0010938	Abnormality of the external nose	642	11	HP	0.0340286	ALX3,SATB2,EXOSC2,ZIC2,FOXG1,MAFB,HIC1,LHX4,ALX1,PAX3,SIM1
query_1	HP:0004122	Midline defect of the nose	13	2	HP	0.0341171	ALX3,ALX1
query_1	HP:0001507	Growth abnormality	1829	22	HP	0.0343824	SDCCAG8,TRAPPC9,SATB2,PITX2,EXOSC2,ZIC2,TBX15,FOXG1,FEZF1,TBR1,MAFB,PAX6,HIC1,BRF1,WNT2B,LHX4,MMP9,GATA5,SIM1,CNTNAP2,RNF216,TUBB2B
query_1	HP:0011927	Short digit	376	8	HP	0.0343824	ALX3,ZIC1,EXOSC2,TBX15,MAFB,ALX1,PAX3,GATA5
query_1	HP:0000429	Abnormality of the nasal alae	464	9	HP	0.035367	ALX3,SATB2,EXOSC2,ZIC2,FOXG1,MAFB,HIC1,ALX1,PAX3
query_1	GO:0048546	digestive tract morphogenesis	49	3	GO:BP	0.0362176	HIF1A,SHOX2,TCF7
query_1	GO:0090102	cochlea development	49	3	GO:BP	0.0362176	SLC26A5,MYO3A,SIX1
query_2	GO:0016491	oxidoreductase activity	656	2	GO:MF	0.0367918	ALDH4A1,PDIA6
query_1	GO:0001823	mesonephros development	100	4	GO:BP	0.0374743	SOX8,WNT2B,SIX1,SIM1
query_1	GO:0060579	ventral spinal cord interneuron fate commitment	15	2	GO:BP	0.0375663	EVX1,PAX6
query_1	GO:0060581	cell fate commitment involved in pattern specification	15	2	GO:BP	0.0375663	EVX1,PAX6
query_1	GO:0061564	axon development	484	9	GO:BP	0.0390819	FOXG1,ATOH1,FEZF1,TBR1,SHOX2,NR2E1,PAX6,LHX4,TUBB2B
query_1	HP:0012472	Eclabion	97	4	HP	0.0394113	PITX2,FOXG1,MAFB,PAX6
query_1	GO:0060077	inhibitory synapse	14	2	GO:CC	0.0394162	GAD2,GLRA1
query_1	GO:0060563	neuroepithelial cell differentiation	51	3	GO:BP	0.039867	INSM1,ATOH1,EMX1
query_1	GO:0010721	negative regulation of cell development	316	7	GO:BP	0.0412118	FOXG1,DLX1,GFI1,SOX8,NR2E1,PAX6,TP73
query_1	GO:0003205	cardiac chamber development	167	5	GO:BP	0.0418931	HIF1A,HAND1,SHOX2,PARVA,TBX20
query_1	GO:0061548	ganglion development	16	2	GO:BP	0.0418931	INSM1,SIX1
query_1	GO:0043651	linoleic acid metabolic process	16	2	GO:BP	0.0418931	ELOVL2,FADS2
query_1	HP:0009891	Underdeveloped supraorbital ridges	49	3	HP	0.0420521	TRAPPC9,ZIC1,GATA5
query_1	HP:0001762	Talipes equinovarus	232	6	HP	0.0429606	SATB2,TBX15,FOXG1,MAFB,GDAP1,JPH1
query_1	HP:0009120	Aplasia/Hypoplasia involving the sinuses	15	2	HP	0.0429606	ALX3,ALX1
query_1	HP:0000659	Peters anomaly	15	2	HP	0.0429606	PITX2,PAX6
query_1	HP:0000460	Narrow nose	15	2	HP	0.0429606	SATB2,SIM1
query_1	GO:0002066	columnar/cuboidal epithelial cell development	53	3	GO:BP	0.0436863	HIF1A,INSM1,PAX6
query_1	HP:0009888	Abnormality of secondary sexual hair	51	3	HP	0.0448698	DSC3,FEZF1,LHX4
query_1	HP:0008053	Aplasia/Hypoplasia of the iris	102	4	HP	0.0448698	PITX2,MAFB,PAX6,PAX3
query_1	HP:0008055	Aplasia/Hypoplasia affecting the uvea	102	4	HP	0.0448698	PITX2,MAFB,PAX6,PAX3
query_1	HP:0008070	Sparse hair	236	6	HP	0.0448698	SATB2,DSC3,EXOSC2,FEZF1,BRF1,ALX1
query_1	HP:0100807	Long fingers	165	5	HP	0.0448698	TRAPPC9,SATB2,TBR1,BRF1,SIM1
query_1	HP:0003011	Abnormality of the musculature	2005	23	HP	0.0451754	SDCCAG8,TRAPPC9,ALX3,SATB2,ZIC1,ZIC2,TBX15,FOXG1,FEZF1,TBR1,MAFB,PAX6,GDAP1,SIX1,GLRA1,LHX4,ALX1,PAX3,SIM1,CNTNAP2,RNF216,JPH1,TUBB2B
query_1	HP:0000324	Facial asymmetry	103	4	HP	0.0451754	SATB2,ZIC1,MAFB,SIX1
query_1	HP:0000482	Microcornea	103	4	HP	0.0451754	PITX2,TBX15,MAFB,FOXL2
query_1	HP:0000589	Coloboma	167	5	HP	0.0460361	ALX3,ZIC2,TBR1,MAFB,PAX6
query_1	HP:0000470	Short neck	239	6	HP	0.0460361	SDCCAG8,TRAPPC9,TBX15,TBR1,MAFB,BRF1
query_1	GO:0021761	limbic system development	107	4	GO:BP	0.0460573	DLX1,TBR1,NR2E1,CNTNAP2
query_1	GO:0021514	ventral spinal cord interneuron differentiation	17	2	GO:BP	0.0468081	EVX1,PAX6
query_1	HP:0005105	Abnormal nasal morphology	684	11	HP	0.0477108	ALX3,SATB2,EXOSC2,ZIC2,FOXG1,MAFB,HIC1,ALX1,PAX3,GATA5,SIM1
query_1	HP:0000676	Abnormality of the incisor	53	3	HP	0.0477108	ALX3,ZIC2,BRF1
query_1	HP:0040070	Abnormal upper limb bone morphology	322	7	HP	0.0487063	SATB2,ZIC1,EXOSC2,TBX15,FOXG1,MAFB,MMP9
query_1	GO:0005488	binding	13210	97	GO:MF	0.049306	SDCCAG8,EVX1,HIF1A,TRAPPC9,ALX3,SATB2,PITX2,NKX2-4,ZIC1,DSC3,EXOSC2,ZIC2,BSX,INSM1,TBX15,ESRRG,FOXG1,ZIC4,HSPBP1,MT1A,GAD2,ZNF518A,SYNGR3,DLX1,ATOH1,HAND1,SLC26A5,OLIG3,FEZF1,TBR1,MYO3A,HOXC4,GFI1,SHOX2,FEV,MAFB,FOXL2,SOX8,DUPD1,HOXC11,NR2E1,SLC15A3,RNF175,OPRM1,PAX6,OTX1,DMRT2,CLVS2,CDK20,BNC1,PARVA,HIC1,GPR62,BRF1,ONECUT2,EVX2,TBX18,ZIC5,GDAP1,HMG20B,WNT2B,NBEA,DHX40,SIX1,KLF14,TP73,ELOVL2,GLRA…
query_1	HP:0008062	Aplasia/Hypoplasia affecting the anterior segment of the eye	107	4	HP	0.0497302	PITX2,MAFB,PAX6,PAX3
query_1	HP:0009099	Median cleft palate	18	2	HP	0.0499944	ALX3,LHX4
query_1	HP:0010993	Abnormality of the cerebral subcortex	698	11	HP	0.0499944	TRAPPC9,ALX3,ZIC1,ZIC2,FOXG1,PAX6,HIC1,LHX4,ALX1,CNTNAP2,TUBB2B
query_1	HP:0011384	Abnormality of the internal auditory canal	18	2	HP	0.0499944	MAFB,SIX1
query_1	HP:0011365	Patchy hypopigmentation of hair	18	2	HP	0.0499944	MAFB,PAX3
query_1	HP:0011357	Abnormality of hair density	248	6	HP	0.0499944	SATB2,DSC3,EXOSC2,FEZF1,BRF1,ALX1
query_1	HP:0000369	Low-set ears	511	9	HP	0.0499944	SDCCAG8,ALX3,SATB2,EXOSC2,TBX15,TBR1,BRF1,ALX1,SIM1
query_1	HP:0002536	Abnormal cortical gyration	249	6	HP	0.0499944	TRAPPC9,FOXG1,TBR1,PAX6,HIC1,TUBB2B
query_1	HP:0000110	Renal dysplasia	56	3	HP	0.0499944	SDCCAG8,TBX18,SIX1
query_1	HP:0000525	Abnormality iris morphology	327	7	HP	0.0499944	ALX3,PITX2,ZIC2,TBR1,MAFB,PAX6,PAX3
query_1	HP:0000553	Abnormal uvea morphology	414	8	HP	0.0499944	ALX3,PITX2,ZIC2,TBR1,MAFB,PAX6,PAX3,RNF216
query_1	HP:0000646	Amblyopia	57	3	HP	0.0499944	PITX2,MAFB,PAX6
query_1	HP:0000707	Abnormality of the nervous system	2795	29	HP	0.0499944	SDCCAG8,TRAPPC9,ALX3,SATB2,PITX2,ZIC1,EXOSC2,ZIC2,TBX15,FOXG1,FEZF1,TBR1,MAFB,FOXL2,PAX6,HIC1,BRF1,GDAP1,SIX1,GLRA1,LHX4,ALX1,PAX3,SIM1,CNTNAP2,RNF216,JPH1,TUBB2B,TRIM36
query_1	HP:0001100	Heterochromia iridis	18	2	HP	0.0499944	MAFB,PAX3
query_1	HP:0001249	Intellectual disability	1349	17	HP	0.0499944	SDCCAG8,TRAPPC9,ALX3,SATB2,ZIC1,EXOSC2,ZIC2,FOXG1,TBR1,PAX6,BRF1,GLRA1,LHX4,ALX1,PAX3,CNTNAP2,TUBB2B
query_1	HP:0000372	Abnormality of the auditory canal	57	3	HP	0.0499944	TBX15,MAFB,SIX1
query_1	HP:0200064	Asymmetry of iris pigmentation	18	2	HP	0.0499944	MAFB,PAX3
