# Supplementary material for: DNA methylation perturbations may link altered development and aging in the lung
Source: Aging (Albany NY). 2021 Jan 19;13(2):1742–64. doi: 10.18632/aging.202544 (PMC7880367; doi:10.18632/aging.202544)
Supplement: Supplementary Table 10 [file aging-13-202544-s011.xlsx]

## Sheet: Sheet1
Supplementary Table 10. Functional enrichment of age-associated hyper-methylated DMPs in both fetal and adult lung tissue datasets amongst differentially expressed genes in 54 GTEx tissues (sorted by FDR adjusted P-Value). Tissues with the most significant gene enrichment were amongst the downregulated and upregulated genes in Lung and brain. The gene symbol annotation for Ensembl gene ids are al…
Category	GeneSet	N_genes	N_overlap	p	FDR adjusted P	genes
DEG.up	Brain_Frontal_Cortex_BA9	2156	38	5.05747e-08	2.73103e-06	ENSG00000119042:ENSG00000163624:ENSG00000152977:ENSG00000043355:ENSG00000204314:ENSG00000196482:ENSG00000176165:ENSG00000186960:ENSG00000136750:ENSG00000127561:ENSG00000144355:ENSG00000136535:ENSG00000219438:ENSG00000005513:ENSG00000112333:ENSG00000145428:ENSG00000007372:ENSG00000159248:ENSG00000146352:ENSG00000156345:ENSG00000180929:ENSG00000104381:ENSG00000172915:ENSG00000197977:ENSG00000125285…
DEG.up	Brain_Putamen_basal_ganglia	1208	27	7.64924e-08	4.13059e-06	ENSG00000152977:ENSG00000204314:ENSG00000173404:ENSG00000176165:ENSG00000186960:ENSG00000136750:ENSG00000127561:ENSG00000144355:ENSG00000128610:ENSG00000219438:ENSG00000163497:ENSG00000005513:ENSG00000112333:ENSG00000145428:ENSG00000007372:ENSG00000180929:ENSG00000119547:ENSG00000104381:ENSG00000197977:ENSG00000125285:ENSG00000145248:ENSG00000134824:ENSG00000174469:ENSG00000123119:ENSG00000137285…
DEG.up	Brain_Cortex	1932	34	3.53645e-07	1.90968e-05	ENSG00000119042:ENSG00000152977:ENSG00000043355:ENSG00000204314:ENSG00000176165:ENSG00000186960:ENSG00000136750:ENSG00000127561:ENSG00000144355:ENSG00000136535:ENSG00000219438:ENSG00000005513:ENSG00000112333:ENSG00000145428:ENSG00000007372:ENSG00000159248:ENSG00000146352:ENSG00000156345:ENSG00000180929:ENSG00000139800:ENSG00000104381:ENSG00000172915:ENSG00000197977:ENSG00000125285:ENSG00000112796…
DEG.up	Brain_Anterior_cingulate_cortex_BA24	1670	31	4.3772e-07	2.36369e-05	ENSG00000119042:ENSG00000152977:ENSG00000043355:ENSG00000204314:ENSG00000176165:ENSG00000186960:ENSG00000136750:ENSG00000127561:ENSG00000144355:ENSG00000136535:ENSG00000219438:ENSG00000005513:ENSG00000112333:ENSG00000145428:ENSG00000007372:ENSG00000159248:ENSG00000146352:ENSG00000180929:ENSG00000104381:ENSG00000197977:ENSG00000125285:ENSG00000112796:ENSG00000145248:ENSG00000134824:ENSG00000174469…
DEG.up	Brain_Caudate_basal_ganglia	1509	29	5.65109e-07	3.05159e-05	ENSG00000152977:ENSG00000204314:ENSG00000173404:ENSG00000176165:ENSG00000186960:ENSG00000136750:ENSG00000127561:ENSG00000144355:ENSG00000128610:ENSG00000219438:ENSG00000005513:ENSG00000112333:ENSG00000145428:ENSG00000007372:ENSG00000159248:ENSG00000146352:ENSG00000180929:ENSG00000119547:ENSG00000104381:ENSG00000197977:ENSG00000125285:ENSG00000145248:ENSG00000134824:ENSG00000174469:ENSG00000123119…
DEG.up	Brain_Nucleus_accumbens_basal_ganglia	1618	30	7.30797e-07	3.9463e-05	ENSG00000152977:ENSG00000204314:ENSG00000173404:ENSG00000176165:ENSG00000186960:ENSG00000136750:ENSG00000127561:ENSG00000144355:ENSG00000128610:ENSG00000219438:ENSG00000095777:ENSG00000163497:ENSG00000005513:ENSG00000112333:ENSG00000145428:ENSG00000146352:ENSG00000156345:ENSG00000180929:ENSG00000119547:ENSG00000104381:ENSG00000197977:ENSG00000125285:ENSG00000145248:ENSG00000134824:ENSG00000174469…
DEG.up	Brain_Hypothalamus	1738	30	3.24643e-06	0.000175307	ENSG00000152977:ENSG00000043355:ENSG00000188909:ENSG00000204314:ENSG00000173404:ENSG00000174963:ENSG00000136750:ENSG00000127561:ENSG00000144355:ENSG00000128610:ENSG00000219438:ENSG00000005513:ENSG00000112333:ENSG00000145428:ENSG00000146352:ENSG00000180929:ENSG00000104381:ENSG00000197977:ENSG00000145888:ENSG00000125285:ENSG00000153956:ENSG00000112246:ENSG00000145248:ENSG00000134824:ENSG00000174469…
DEG.up	Brain_Amygdala	1289	25	3.50947e-06	0.000189511	ENSG00000043355:ENSG00000204314:ENSG00000176165:ENSG00000186960:ENSG00000136750:ENSG00000127561:ENSG00000144355:ENSG00000128610:ENSG00000136535:ENSG00000219438:ENSG00000005513:ENSG00000112333:ENSG00000145428:ENSG00000007372:ENSG00000180929:ENSG00000104381:ENSG00000197977:ENSG00000125285:ENSG00000134824:ENSG00000174469:ENSG00000135638:ENSG00000123119:ENSG00000137285:ENSG00000256463:ENSG00000258986
DEG.up	Brain_Hippocampus	1381	26	3.69432e-06	0.000199493	ENSG00000152977:ENSG00000043355:ENSG00000204314:ENSG00000176165:ENSG00000186960:ENSG00000136750:ENSG00000127561:ENSG00000144355:ENSG00000136535:ENSG00000219438:ENSG00000005513:ENSG00000112333:ENSG00000145428:ENSG00000146352:ENSG00000180929:ENSG00000104381:ENSG00000197977:ENSG00000125285:ENSG00000134824:ENSG00000174469:ENSG00000135638:ENSG00000123119:ENSG00000137285:ENSG00000256463:ENSG00000258986…
DEG.up	Brain_Substantia_nigra	1148	23	5.48631e-06	0.000296261	ENSG00000152977:ENSG00000196482:ENSG00000136750:ENSG00000127561:ENSG00000128610:ENSG00000219438:ENSG00000167641:ENSG00000005513:ENSG00000112333:ENSG00000180929:ENSG00000104381:ENSG00000197977:ENSG00000145888:ENSG00000125285:ENSG00000112796:ENSG00000145248:ENSG00000134824:ENSG00000174469:ENSG00000123119:ENSG00000137285:ENSG00000256463:ENSG00000258986:ENSG00000152503
DEG.up	Pituitary	2855	38	5.33208e-05	0.00287932	ENSG00000167632:ENSG00000156150:ENSG00000164093:ENSG00000204314:ENSG00000173404:ENSG00000176165:ENSG00000177853:ENSG00000127561:ENSG00000128610:ENSG00000163497:ENSG00000183770:ENSG00000145428:ENSG00000159248:ENSG00000146352:ENSG00000156345:ENSG00000177374:ENSG00000185024:ENSG00000119547:ENSG00000104381:ENSG00000172915:ENSG00000108406:ENSG00000126778:ENSG00000197977:ENSG00000149380:ENSG00000121454…
DEG.down	Lung	743	16	7.6767e-05	0.00414542	ENSG00000105131:ENSG00000119042:ENSG00000231609:ENSG00000204314:ENSG00000092607:ENSG00000127561:ENSG00000219438:ENSG00000198353:ENSG00000005513:ENSG00000104381:ENSG00000172915:ENSG00000153956:ENSG00000134253:ENSG00000137285:ENSG00000152503:ENSG00000152078
DEG.twoside	Pituitary	4473	50	0.00021706	0.0117212	ENSG00000167632:ENSG00000105131:ENSG00000156150:ENSG00000119042:ENSG00000164093:ENSG00000204314:ENSG00000173404:ENSG00000092607:ENSG00000176165:ENSG00000177853:ENSG00000127561:ENSG00000128610:ENSG00000167641:ENSG00000163497:ENSG00000204103:ENSG00000183770:ENSG00000005513:ENSG00000110446:ENSG00000145428:ENSG00000159248:ENSG00000146352:ENSG00000156345:ENSG00000177374:ENSG00000185024:ENSG00000119547…
DEG.up	Brain_Cerebellum	3585	40	0.00145443	0.0785395	ENSG00000167632:ENSG00000163624:ENSG00000231609:ENSG00000152977:ENSG00000130713:ENSG00000043355:ENSG00000204314:ENSG00000173404:ENSG00000196482:ENSG00000174963:ENSG00000136750:ENSG00000127561:ENSG00000170615:ENSG00000219438:ENSG00000005513:ENSG00000145428:ENSG00000112038:ENSG00000007372:ENSG00000146352:ENSG00000156345:ENSG00000180929:ENSG00000185024:ENSG00000119547:ENSG00000139800:ENSG00000104381…
DEG.up	Brain_Spinal_cord_cervical_c-1	1436	20	0.00283271	0.152966	ENSG00000152977:ENSG00000043355:ENSG00000174963:ENSG00000127561:ENSG00000219438:ENSG00000167641:ENSG00000005513:ENSG00000173253:ENSG00000180929:ENSG00000104381:ENSG00000197977:ENSG00000142700:ENSG00000134824:ENSG00000174469:ENSG00000123119:ENSG00000137285:ENSG00000256463:ENSG00000104549:ENSG00000258986:ENSG00000152503
DEG.twoside	Adipose_Subcutaneous	2746	30	0.00957193	0.516884	ENSG00000163624:ENSG00000134762:ENSG00000204314:ENSG00000092607:ENSG00000205362:ENSG00000219438:ENSG00000198353:ENSG00000168779:ENSG00000204103:ENSG00000005513:ENSG00000123388:ENSG00000110446:ENSG00000173253:ENSG00000156345:ENSG00000197702:ENSG00000177374:ENSG00000112837:ENSG00000172915:ENSG00000126778:ENSG00000143367:ENSG00000100985:ENSG00000081059:ENSG00000112796:ENSG00000112246:ENSG00000123119…
DEG.up	Brain_Cerebellar_Hemisphere	3736	38	0.0103689	0.559921	ENSG00000163624:ENSG00000231609:ENSG00000152977:ENSG00000130713:ENSG00000043355:ENSG00000204314:ENSG00000173404:ENSG00000196482:ENSG00000174963:ENSG00000136750:ENSG00000127561:ENSG00000170615:ENSG00000219438:ENSG00000005513:ENSG00000145428:ENSG00000007372:ENSG00000146352:ENSG00000156345:ENSG00000180929:ENSG00000185024:ENSG00000119547:ENSG00000139800:ENSG00000104381:ENSG00000172915:ENSG00000078900…
DEG.down	Adipose_Subcutaneous	1198	16	0.0112264	0.606226	ENSG00000163624:ENSG00000134762:ENSG00000204314:ENSG00000219438:ENSG00000005513:ENSG00000156345:ENSG00000172915:ENSG00000143367:ENSG00000081059:ENSG00000112796:ENSG00000123119:ENSG00000104177:ENSG00000137285:ENSG00000104549:ENSG00000184185:ENSG00000101057
DEG.down	Vagina	543	9	0.0159614	0.861916	ENSG00000127561:ENSG00000198353:ENSG00000005513:ENSG00000100985:ENSG00000112796:ENSG00000104177:ENSG00000184185:ENSG00000152503:ENSG00000152078
DEG.down	Adipose_Visceral_Omentum	1265	16	0.0180402	0.974173	ENSG00000163624:ENSG00000204314:ENSG00000219438:ENSG00000005513:ENSG00000104381:ENSG00000172915:ENSG00000197977:ENSG00000112796:ENSG00000123119:ENSG00000112812:ENSG00000134253:ENSG00000104177:ENSG00000137285:ENSG00000104549:ENSG00000101057:ENSG00000152078
DEG.up	Adipose_Subcutaneous	1548	14	0.215925	1	ENSG00000092607:ENSG00000205362:ENSG00000198353:ENSG00000168779:ENSG00000204103:ENSG00000123388:ENSG00000110446:ENSG00000173253:ENSG00000197702:ENSG00000177374:ENSG00000112837:ENSG00000126778:ENSG00000100985:ENSG00000112246
DEG.up	Adipose_Visceral_Omentum	1340	9	0.62849	1	ENSG00000205362:ENSG00000167641:ENSG00000204103:ENSG00000110446:ENSG00000169594:ENSG00000197702:ENSG00000177374:ENSG00000130700:ENSG00000146678
DEG.up	Adrenal_Gland	1061	9	0.348684	1	ENSG00000106038:ENSG00000119042:ENSG00000196482:ENSG00000167641:ENSG00000163497:ENSG00000183770:ENSG00000156345:ENSG00000130700:ENSG00000134824
DEG.up	Artery_Aorta	1894	14	0.491803	1	ENSG00000205362:ENSG00000219438:ENSG00000167641:ENSG00000197702:ENSG00000112837:ENSG00000149380:ENSG00000113248:ENSG00000145248:ENSG00000134824:ENSG00000011275:ENSG00000104177:ENSG00000262576:ENSG00000152503:ENSG00000152078
DEG.up	Artery_Coronary	1461	14	0.15999	1	ENSG00000205362:ENSG00000167641:ENSG00000204103:ENSG00000110446:ENSG00000197702:ENSG00000112837:ENSG00000149380:ENSG00000112796:ENSG00000113248:ENSG00000134824:ENSG00000104177:ENSG00000262576:ENSG00000164532:ENSG00000152078
DEG.up	Artery_Tibial	1953	19	0.100819	1	ENSG00000092607:ENSG00000205362:ENSG00000167641:ENSG00000095777:ENSG00000198353:ENSG00000168779:ENSG00000123388:ENSG00000197702:ENSG00000112837:ENSG00000108406:ENSG00000149380:ENSG00000180318:ENSG00000153956:ENSG00000135903:ENSG00000112796:ENSG00000011275:ENSG00000104177:ENSG00000262576:ENSG00000152503
DEG.up	Bladder	671	9	0.0513785	1	ENSG00000164093:ENSG00000167641:ENSG00000156345:ENSG00000197702:ENSG00000177374:ENSG00000143367:ENSG00000149380:ENSG00000130700:ENSG00000134253
DEG.up	Breast_Mammary_Tissue	1333	9	0.622121	1	ENSG00000092607:ENSG00000205362:ENSG00000170615:ENSG00000168779:ENSG00000204103:ENSG00000173253:ENSG00000197702:ENSG00000177374:ENSG00000135903
DEG.up	Cells_Cultured_fibroblasts	3319	24	0.51462	1	ENSG00000119042:ENSG00000164093:ENSG00000152977:ENSG00000130713:ENSG00000092607:ENSG00000174963:ENSG00000205362:ENSG00000144355:ENSG00000198353:ENSG00000168779:ENSG00000123388:ENSG00000169594:ENSG00000197702:ENSG00000112837:ENSG00000108406:ENSG00000126778:ENSG00000149380:ENSG00000180318:ENSG00000153956:ENSG00000135903:ENSG00000112246:ENSG00000262576:ENSG00000104549:ENSG00000101057
DEG.up	Cells_EBV-transformed_lymphocytes	3470	13	0.998681	1	ENSG00000130713:ENSG00000162676:ENSG00000110446:ENSG00000104951:ENSG00000177374:ENSG00000078900:ENSG00000100985:ENSG00000081059:ENSG00000134824:ENSG00000135638:ENSG00000104177:ENSG00000104549:ENSG00000101057
DEG.up	Cervix_Ectocervix	176	0	1	1
DEG.up	Cervix_Endocervix	1577	9	0.807401	1	ENSG00000130713:ENSG00000219438:ENSG00000167641:ENSG00000168779:ENSG00000183770:ENSG00000156345:ENSG00000197702:ENSG00000113248:ENSG00000134824
DEG.up	Colon_Sigmoid	1146	13	0.0658568	1	ENSG00000231609:ENSG00000172238:ENSG00000113196:ENSG00000167641:ENSG00000110446:ENSG00000197702:ENSG00000177374:ENSG00000174279:ENSG00000172915:ENSG00000153956:ENSG00000123119:ENSG00000011275:ENSG00000137285
DEG.up	Colon_Transverse	1034	6	0.757562	1	ENSG00000119042:ENSG00000172238:ENSG00000113196:ENSG00000162676:ENSG00000145569:ENSG00000112812
DEG.up	Esophagus_Gastroesophageal_Junction	902	9	0.197129	1	ENSG00000164093:ENSG00000167641:ENSG00000110446:ENSG00000197702:ENSG00000177374:ENSG00000172915:ENSG00000123119:ENSG00000011275:ENSG00000104177
DEG.up	Esophagus_Mucosa	1616	13	0.371489	1	ENSG00000105131:ENSG00000163624:ENSG00000134762:ENSG00000198353:ENSG00000204103:ENSG00000169594:ENSG00000078900:ENSG00000125285:ENSG00000143367:ENSG00000142700:ENSG00000112812:ENSG00000104549:ENSG00000101057
DEG.up	Esophagus_Muscularis	934	9	0.225201	1	ENSG00000164093:ENSG00000167641:ENSG00000110446:ENSG00000197702:ENSG00000177374:ENSG00000113248:ENSG00000123119:ENSG00000011275:ENSG00000104177
DEG.up	Fallopian_Tube	423	4	0.358999	1	ENSG00000130713:ENSG00000198353:ENSG00000197702:ENSG00000177374
DEG.up	Heart_Atrial_Appendage	520	4	0.513391	1	ENSG00000196482:ENSG00000159248:ENSG00000164532:ENSG00000152078
DEG.up	Heart_Left_Ventricle	358	3	0.474174	1	ENSG00000196482:ENSG00000113196:ENSG00000164532
DEG.up	Kidney_Cortex	880	8	0.29467	1	ENSG00000196482:ENSG00000198353:ENSG00000173253:ENSG00000180318:ENSG00000130700:ENSG00000112246:ENSG00000135638:ENSG00000256463
DEG.up	Kidney_Medulla	90	0	1	1
DEG.up	Liver	994	5	0.846752	1	ENSG00000205362:ENSG00000119547:ENSG00000197977:ENSG00000146678:ENSG00000152078
DEG.up	Lung	2823	16	0.878851	1	ENSG00000054282:ENSG00000205362:ENSG00000167641:ENSG00000162676:ENSG00000204103:ENSG00000110446:ENSG00000173253:ENSG00000197702:ENSG00000177374:ENSG00000134245:ENSG00000100985:ENSG00000145569:ENSG00000130700:ENSG00000113248:ENSG00000112812:ENSG00000104549
DEG.up	Minor_Salivary_Gland	1175	10	0.331972	1	ENSG00000163624:ENSG00000164093:ENSG00000134762:ENSG00000115507:ENSG00000126778:ENSG00000078900:ENSG00000143367:ENSG00000180318:ENSG00000135903:ENSG00000112812
DEG.up	Muscle_Skeletal	785	8	0.200181	1	ENSG00000164093:ENSG00000092607:ENSG00000188716:ENSG00000126778:ENSG00000153956:ENSG00000134253:ENSG00000104369:ENSG00000184185
DEG.up	Nerve_Tibial	3767	23	0.838121	1	ENSG00000054282:ENSG00000231609:ENSG00000130713:ENSG00000092607:ENSG00000205362:ENSG00000177853:ENSG00000219438:ENSG00000198353:ENSG00000168779:ENSG00000005513:ENSG00000110446:ENSG00000197702:ENSG00000177374:ENSG00000185024:ENSG00000112837:ENSG00000134245:ENSG00000081059:ENSG00000113248:ENSG00000134824:ENSG00000134253:ENSG00000104177:ENSG00000262576:ENSG00000137285
DEG.up	Ovary	3254	19	0.869419	1	ENSG00000231609:ENSG00000130713:ENSG00000204314:ENSG00000177853:ENSG00000167641:ENSG00000198353:ENSG00000183770:ENSG00000110446:ENSG00000156345:ENSG00000197702:ENSG00000177374:ENSG00000134245:ENSG00000172915:ENSG00000108406:ENSG00000121454:ENSG00000113248:ENSG00000146678:ENSG00000134253:ENSG00000262576
DEG.up	Pancreas	499	5	0.286462	1	ENSG00000162676:ENSG00000159248:ENSG00000119547:ENSG00000112812:ENSG00000101057
DEG.up	Prostate	1851	18	0.109093	1	ENSG00000106038:ENSG00000163497:ENSG00000146352:ENSG00000177374:ENSG00000174279:ENSG00000134245:ENSG00000126778:ENSG00000078900:ENSG00000149380:ENSG00000145569:ENSG00000112796:ENSG00000130700:ENSG00000134824:ENSG00000174469:ENSG00000112812:ENSG00000134253:ENSG00000256463:ENSG00000152503
DEG.up	Skin_Not_Sun_Exposed_Suprapubic	1877	14	0.477622	1	ENSG00000105131:ENSG00000163624:ENSG00000134762:ENSG00000204103:ENSG00000123388:ENSG00000115507:ENSG00000169594:ENSG00000134245:ENSG00000078900:ENSG00000125285:ENSG00000143367:ENSG00000135903:ENSG00000112812:ENSG00000104549
DEG.up	Skin_Sun_Exposed_Lower_leg	2007	15	0.470756	1	ENSG00000105131:ENSG00000163624:ENSG00000134762:ENSG00000198353:ENSG00000204103:ENSG00000123388:ENSG00000115507:ENSG00000169594:ENSG00000134245:ENSG00000078900:ENSG00000125285:ENSG00000143367:ENSG00000135903:ENSG00000112812:ENSG00000104549
DEG.up	Small_Intestine_Terminal_Ileum	1731	14	0.355786	1	ENSG00000119042:ENSG00000163624:ENSG00000172238:ENSG00000113196:ENSG00000198353:ENSG00000162676:ENSG00000163497:ENSG00000110446:ENSG00000100985:ENSG00000081059:ENSG00000145569:ENSG00000130700:ENSG00000112812:ENSG00000101057
DEG.up	Spleen	2467	7	0.999366	1	ENSG00000162676:ENSG00000204103:ENSG00000110446:ENSG00000100985:ENSG00000081059:ENSG00000145569:ENSG00000101057
DEG.up	Stomach	697	4	0.740629	1	ENSG00000196482:ENSG00000125285:ENSG00000130700:ENSG00000112812
DEG.up	Testis	5062	35	0.632416	1	ENSG00000106038:ENSG00000163624:ENSG00000125816:ENSG00000043355:ENSG00000176165:ENSG00000186960:ENSG00000177853:ENSG00000128610:ENSG00000167641:ENSG00000095777:ENSG00000112038:ENSG00000104951:ENSG00000156345:ENSG00000169594:ENSG00000185024:ENSG00000174279:ENSG00000139800:ENSG00000108406:ENSG00000197977:ENSG00000149380:ENSG00000121454:ENSG00000180318:ENSG00000142700:ENSG00000135903:ENSG00000112796…
DEG.up	Thyroid	3343	17	0.961308	1	ENSG00000054282:ENSG00000167632:ENSG00000163624:ENSG00000196482:ENSG00000205362:ENSG00000177853:ENSG00000144355:ENSG00000170615:ENSG00000204103:ENSG00000156345:ENSG00000108406:ENSG00000149380:ENSG00000121454:ENSG00000081059:ENSG00000112796:ENSG00000112812:ENSG00000134253
DEG.up	Uterus	3563	23	0.747127	1	ENSG00000156150:ENSG00000231609:ENSG00000130713:ENSG00000177853:ENSG00000167641:ENSG00000198353:ENSG00000183770:ENSG00000146352:ENSG00000156345:ENSG00000197702:ENSG00000177374:ENSG00000185024:ENSG00000172915:ENSG00000108406:ENSG00000149380:ENSG00000121454:ENSG00000180318:ENSG00000130700:ENSG00000113248:ENSG00000134824:ENSG00000011275:ENSG00000134253:ENSG00000262576
DEG.up	Vagina	1872	15	0.361581	1	ENSG00000106038:ENSG00000105131:ENSG00000163624:ENSG00000164093:ENSG00000134762:ENSG00000204103:ENSG00000183770:ENSG00000169594:ENSG00000174279:ENSG00000134245:ENSG00000078900:ENSG00000143367:ENSG00000130700:ENSG00000256463:ENSG00000104549
DEG.up	Whole_Blood	1214	7	0.775058	1	ENSG00000162676:ENSG00000110446:ENSG00000145428:ENSG00000100985:ENSG00000081059:ENSG00000145569:ENSG00000101057
DEG.down	Adrenal_Gland	2735	13	0.966692	1	ENSG00000231609:ENSG00000204314:ENSG00000127561:ENSG00000219438:ENSG00000005513:ENSG00000110446:ENSG00000112837:ENSG00000134245:ENSG00000145569:ENSG00000113248:ENSG00000123119:ENSG00000112812:ENSG00000137285
DEG.down	Artery_Aorta	1234	12	0.171938	1	ENSG00000105131:ENSG00000231609:ENSG00000092607:ENSG00000198353:ENSG00000156345:ENSG00000177374:ENSG00000104381:ENSG00000126778:ENSG00000081059:ENSG00000104369:ENSG00000137285:ENSG00000184185
DEG.down	Artery_Coronary	807	10	0.0635635	1	ENSG00000134762:ENSG00000092607:ENSG00000198353:ENSG00000104381:ENSG00000126778:ENSG00000143367:ENSG00000081059:ENSG00000104549:ENSG00000184185:ENSG00000101057
DEG.down	Artery_Tibial	1625	9	0.83445	1	ENSG00000105131:ENSG00000231609:ENSG00000134762:ENSG00000219438:ENSG00000005513:ENSG00000104381:ENSG00000100985:ENSG00000145569:ENSG00000137285
DEG.down	Bladder	94	1	0.491954	1	ENSG00000198353
DEG.down	Brain_Amygdala	6415	20	1	1	ENSG00000100644:ENSG00000167632:ENSG00000119042:ENSG00000231609:ENSG00000130713:ENSG00000205362:ENSG00000177853:ENSG00000204103:ENSG00000110446:ENSG00000197702:ENSG00000177374:ENSG00000064961:ENSG00000134245:ENSG00000108406:ENSG00000143367:ENSG00000145569:ENSG00000113248:ENSG00000011275:ENSG00000134253:ENSG00000184185
DEG.down	Brain_Anterior_cingulate_cortex_BA24	5518	18	0.999998	1	ENSG00000054282:ENSG00000100644:ENSG00000130713:ENSG00000205362:ENSG00000177853:ENSG00000204103:ENSG00000110446:ENSG00000197702:ENSG00000177374:ENSG00000064961:ENSG00000134245:ENSG00000108406:ENSG00000143367:ENSG00000145569:ENSG00000113248:ENSG00000011275:ENSG00000112812:ENSG00000134253
DEG.down	Brain_Caudate_basal_ganglia	5664	18	0.999999	1	ENSG00000119042:ENSG00000231609:ENSG00000130713:ENSG00000205362:ENSG00000177853:ENSG00000204103:ENSG00000110446:ENSG00000197702:ENSG00000177374:ENSG00000064961:ENSG00000108406:ENSG00000143367:ENSG00000081059:ENSG00000145569:ENSG00000113248:ENSG00000011275:ENSG00000134253:ENSG00000104549
DEG.down	Brain_Cerebellar_Hemisphere	2201	9	0.982132	1	ENSG00000205362:ENSG00000167641:ENSG00000204103:ENSG00000110446:ENSG00000197702:ENSG00000177374:ENSG00000064961:ENSG00000123119:ENSG00000134253
DEG.down	Brain_Cerebellum	2305	11	0.951945	1	ENSG00000205362:ENSG00000167641:ENSG00000204103:ENSG00000110446:ENSG00000197702:ENSG00000177374:ENSG00000064961:ENSG00000081059:ENSG00000145569:ENSG00000123119:ENSG00000134253
DEG.down	Brain_Cortex	4562	15	0.999975	1	ENSG00000100644:ENSG00000205362:ENSG00000177853:ENSG00000204103:ENSG00000110446:ENSG00000197702:ENSG00000177374:ENSG00000112837:ENSG00000064961:ENSG00000134245:ENSG00000108406:ENSG00000143367:ENSG00000145569:ENSG00000113248:ENSG00000011275
DEG.down	Brain_Frontal_Cortex_BA9	4099	14	0.999876	1	ENSG00000205362:ENSG00000177853:ENSG00000204103:ENSG00000110446:ENSG00000197702:ENSG00000177374:ENSG00000064961:ENSG00000134245:ENSG00000108406:ENSG00000143367:ENSG00000145569:ENSG00000113248:ENSG00000011275:ENSG00000134253
DEG.down	Brain_Hippocampus	6248	21	1	1	ENSG00000100644:ENSG00000167632:ENSG00000231609:ENSG00000130713:ENSG00000205362:ENSG00000177853:ENSG00000204103:ENSG00000110446:ENSG00000104951:ENSG00000197702:ENSG00000177374:ENSG00000064961:ENSG00000134245:ENSG00000108406:ENSG00000143367:ENSG00000081059:ENSG00000145569:ENSG00000113248:ENSG00000011275:ENSG00000134253:ENSG00000184185
DEG.down	Brain_Hypothalamus	4911	18	0.999931	1	ENSG00000119042:ENSG00000231609:ENSG00000130713:ENSG00000205362:ENSG00000177853:ENSG00000168779:ENSG00000204103:ENSG00000110446:ENSG00000197702:ENSG00000177374:ENSG00000064961:ENSG00000134245:ENSG00000143367:ENSG00000081059:ENSG00000145569:ENSG00000011275:ENSG00000134253:ENSG00000104369
DEG.down	Brain_Nucleus_accumbens_basal_ganglia	5351	18	0.999995	1	ENSG00000100644:ENSG00000231609:ENSG00000130713:ENSG00000205362:ENSG00000177853:ENSG00000204103:ENSG00000110446:ENSG00000197702:ENSG00000177374:ENSG00000064961:ENSG00000108406:ENSG00000143367:ENSG00000081059:ENSG00000145569:ENSG00000113248:ENSG00000011275:ENSG00000134253:ENSG00000104549
DEG.down	Brain_Putamen_basal_ganglia	6468	17	1	1	ENSG00000054282:ENSG00000100644:ENSG00000231609:ENSG00000130713:ENSG00000205362:ENSG00000177853:ENSG00000204103:ENSG00000110446:ENSG00000197702:ENSG00000177374:ENSG00000064961:ENSG00000108406:ENSG00000143367:ENSG00000113248:ENSG00000011275:ENSG00000134253:ENSG00000104549
DEG.down	Brain_Spinal_cord_cervical_c-1	4182	12	0.999992	1	ENSG00000163624:ENSG00000130713:ENSG00000205362:ENSG00000204103:ENSG00000156345:ENSG00000197702:ENSG00000177374:ENSG00000112837:ENSG00000172915:ENSG00000143367:ENSG00000011275:ENSG00000184185
DEG.down	Brain_Substantia_nigra	5942	25	0.999863	1	ENSG00000119042:ENSG00000231609:ENSG00000130713:ENSG00000205362:ENSG00000177853:ENSG00000198353:ENSG00000204103:ENSG00000110446:ENSG00000156345:ENSG00000197702:ENSG00000177374:ENSG00000064961:ENSG00000134245:ENSG00000172915:ENSG00000108406:ENSG00000143367:ENSG00000153956:ENSG00000081059:ENSG00000145569:ENSG00000113248:ENSG00000011275:ENSG00000134253:ENSG00000104369:ENSG00000184185:ENSG00000152078
DEG.down	Breast_Mammary_Tissue	843	11	0.0389694	1	ENSG00000219438:ENSG00000005513:ENSG00000145428:ENSG00000134824:ENSG00000123119:ENSG00000104369:ENSG00000104177:ENSG00000104549:ENSG00000184185:ENSG00000152503:ENSG00000101057
DEG.down	Cells_Cultured_fibroblasts	1580	15	0.157252	1	ENSG00000167632:ENSG00000204314:ENSG00000127561:ENSG00000219438:ENSG00000167641:ENSG00000204103:ENSG00000110446:ENSG00000156345:ENSG00000134245:ENSG00000172915:ENSG00000100985:ENSG00000081059:ENSG00000112796:ENSG00000123119:ENSG00000137285
DEG.down	Cells_EBV-transformed_lymphocytes	1886	6	0.99476	1	ENSG00000231609:ENSG00000134762:ENSG00000143367:ENSG00000123119:ENSG00000134253:ENSG00000184185
DEG.down	Cervix_Ectocervix	2	0	1	1
DEG.down	Cervix_Endocervix	5	0	1	1
DEG.down	Colon_Sigmoid	1407	8	0.799454	1	ENSG00000163624:ENSG00000104381:ENSG00000197977:ENSG00000100985:ENSG00000104369:ENSG00000104549:ENSG00000258986:ENSG00000184185
DEG.down	Colon_Transverse	1269	7	0.812858	1	ENSG00000127561:ENSG00000198353:ENSG00000005513:ENSG00000104381:ENSG00000112796:ENSG00000134824:ENSG00000184185
DEG.down	Esophagus_Gastroesophageal_Junction	1294	12	0.214654	1	ENSG00000119042:ENSG00000163624:ENSG00000092607:ENSG00000168779:ENSG00000005513:ENSG00000104381:ENSG00000100985:ENSG00000081059:ENSG00000145569:ENSG00000104369:ENSG00000104549:ENSG00000184185
DEG.down	Esophagus_Mucosa	2827	19	0.657071	1	ENSG00000204314:ENSG00000205362:ENSG00000219438:ENSG00000005513:ENSG00000110446:ENSG00000156345:ENSG00000177374:ENSG00000112837:ENSG00000104381:ENSG00000172915:ENSG00000153956:ENSG00000100985:ENSG00000145569:ENSG00000113248:ENSG00000134824:ENSG00000123119:ENSG00000011275:ENSG00000134253:ENSG00000137285
DEG.down	Esophagus_Muscularis	1453	12	0.345586	1	ENSG00000119042:ENSG00000163624:ENSG00000092607:ENSG00000219438:ENSG00000168779:ENSG00000104381:ENSG00000100985:ENSG00000081059:ENSG00000145569:ENSG00000112796:ENSG00000104549:ENSG00000184185
DEG.down	Fallopian_Tube	1	0	1	1
DEG.down	Heart_Atrial_Appendage	6703	23	1	1	ENSG00000054282:ENSG00000130713:ENSG00000204314:ENSG00000092607:ENSG00000177853:ENSG00000219438:ENSG00000167641:ENSG00000204103:ENSG00000110446:ENSG00000156345:ENSG00000185024:ENSG00000104381:ENSG00000064961:ENSG00000134245:ENSG00000108406:ENSG00000143367:ENSG00000100985:ENSG00000081059:ENSG00000112796:ENSG00000134824:ENSG00000104177:ENSG00000137285:ENSG00000104549
DEG.down	Heart_Left_Ventricle	7745	27	1	1	ENSG00000054282:ENSG00000100644:ENSG00000167632:ENSG00000130713:ENSG00000204314:ENSG00000133265:ENSG00000205362:ENSG00000177853:ENSG00000167641:ENSG00000204103:ENSG00000005513:ENSG00000110446:ENSG00000156345:ENSG00000185024:ENSG00000112837:ENSG00000064961:ENSG00000172915:ENSG00000108406:ENSG00000143367:ENSG00000100985:ENSG00000112796:ENSG00000113248:ENSG00000134824:ENSG00000123119:ENSG00000011275…
DEG.down	Kidney_Cortex	4573	18	0.999588	1	ENSG00000130713:ENSG00000204314:ENSG00000219438:ENSG00000005513:ENSG00000110446:ENSG00000185024:ENSG00000104381:ENSG00000134245:ENSG00000172915:ENSG00000153956:ENSG00000145569:ENSG00000113248:ENSG00000134824:ENSG00000123119:ENSG00000011275:ENSG00000104369:ENSG00000184185:ENSG00000152078
DEG.down	Kidney_Medulla	0	0	1	1
DEG.down	Liver	6540	22	1	1	ENSG00000054282:ENSG00000100644:ENSG00000167632:ENSG00000119042:ENSG00000130713:ENSG00000204314:ENSG00000133265:ENSG00000177853:ENSG00000219438:ENSG00000167641:ENSG00000110446:ENSG00000156345:ENSG00000197702:ENSG00000177374:ENSG00000185024:ENSG00000104381:ENSG00000108406:ENSG00000143367:ENSG00000100985:ENSG00000081059:ENSG00000011275:ENSG00000101057
DEG.down	Minor_Salivary_Gland	1498	13	0.273749	1	ENSG00000204314:ENSG00000167641:ENSG00000110446:ENSG00000177374:ENSG00000112837:ENSG00000104381:ENSG00000134245:ENSG00000153956:ENSG00000145569:ENSG00000113248:ENSG00000123119:ENSG00000104177:ENSG00000184185
DEG.down	Muscle_Skeletal	5559	22	0.999921	1	ENSG00000054282:ENSG00000100644:ENSG00000119042:ENSG00000130713:ENSG00000177853:ENSG00000167641:ENSG00000168779:ENSG00000204103:ENSG00000005513:ENSG00000110446:ENSG00000156345:ENSG00000197702:ENSG00000177374:ENSG00000185024:ENSG00000104381:ENSG00000064961:ENSG00000172915:ENSG00000108406:ENSG00000143367:ENSG00000134824:ENSG00000011275:ENSG00000137285
DEG.down	Nerve_Tibial	725	5	0.597403	1	ENSG00000134762:ENSG00000143367:ENSG00000100985:ENSG00000112796:ENSG00000184185
DEG.down	Ovary	1339	9	0.627583	1	ENSG00000134762:ENSG00000176165:ENSG00000204103:ENSG00000005513:ENSG00000100985:ENSG00000081059:ENSG00000104177:ENSG00000137285:ENSG00000152078
DEG.down	Pancreas	7845	31	1	1	ENSG00000054282:ENSG00000100644:ENSG00000167632:ENSG00000119042:ENSG00000163624:ENSG00000231609:ENSG00000130713:ENSG00000204314:ENSG00000133265:ENSG00000205362:ENSG00000136750:ENSG00000177853:ENSG00000219438:ENSG00000167641:ENSG00000204103:ENSG00000005513:ENSG00000110446:ENSG00000156345:ENSG00000177374:ENSG00000185024:ENSG00000104381:ENSG00000064961:ENSG00000172915:ENSG00000108406:ENSG00000197977…
DEG.down	Pituitary	1618	12	0.493531	1	ENSG00000105131:ENSG00000119042:ENSG00000092607:ENSG00000167641:ENSG00000204103:ENSG00000005513:ENSG00000110446:ENSG00000112837:ENSG00000100985:ENSG00000130700:ENSG00000104369:ENSG00000184185
DEG.down	Prostate	640	6	0.309085	1	ENSG00000105131:ENSG00000198353:ENSG00000005513:ENSG00000100985:ENSG00000137285:ENSG00000101057
DEG.down	Skin_Not_Sun_Exposed_Suprapubic	2116	16	0.447651	1	ENSG00000204314:ENSG00000219438:ENSG00000167641:ENSG00000110446:ENSG00000177374:ENSG00000104381:ENSG00000172915:ENSG00000153956:ENSG00000145569:ENSG00000112796:ENSG00000113248:ENSG00000123119:ENSG00000104369:ENSG00000104177:ENSG00000137285:ENSG00000152078
DEG.down	Skin_Sun_Exposed_Lower_leg	1921	19	0.0891515	1	ENSG00000152977:ENSG00000204314:ENSG00000219438:ENSG00000167641:ENSG00000110446:ENSG00000177374:ENSG00000104381:ENSG00000172915:ENSG00000149380:ENSG00000153956:ENSG00000100985:ENSG00000145569:ENSG00000112796:ENSG00000113248:ENSG00000123119:ENSG00000104369:ENSG00000104177:ENSG00000137285:ENSG00000152078
DEG.down	Small_Intestine_Terminal_Ileum	1131	8	0.566306	1	ENSG00000219438:ENSG00000104381:ENSG00000153956:ENSG00000112796:ENSG00000134824:ENSG00000123119:ENSG00000134253:ENSG00000104369
DEG.down	Spleen	1746	18	0.0712648	1	ENSG00000119042:ENSG00000163624:ENSG00000231609:ENSG00000204314:ENSG00000205362:ENSG00000127561:ENSG00000198353:ENSG00000005513:ENSG00000156345:ENSG00000197702:ENSG00000104381:ENSG00000134245:ENSG00000172915:ENSG00000143367:ENSG00000153956:ENSG00000134824:ENSG00000123119:ENSG00000112812
DEG.down	Stomach	2087	13	0.745425	1	ENSG00000119042:ENSG00000204314:ENSG00000219438:ENSG00000204103:ENSG00000005513:ENSG00000104381:ENSG00000153956:ENSG00000100985:ENSG00000134824:ENSG00000123119:ENSG00000104369:ENSG00000137285:ENSG00000184185
DEG.down	Testis	2383	13	0.88829	1	ENSG00000092607:ENSG00000205362:ENSG00000219438:ENSG00000204103:ENSG00000110446:ENSG00000197702:ENSG00000177374:ENSG00000112837:ENSG00000153956:ENSG00000100985:ENSG00000104369:ENSG00000137285:ENSG00000184185
DEG.down	Thyroid	884	12	0.024291	1	ENSG00000092607:ENSG00000219438:ENSG00000167641:ENSG00000198353:ENSG00000168779:ENSG00000005513:ENSG00000112837:ENSG00000134824:ENSG00000104369:ENSG00000104177:ENSG00000137285:ENSG00000101057
DEG.down	Uterus	740	7	0.279247	1	ENSG00000105131:ENSG00000163624:ENSG00000005513:ENSG00000100985:ENSG00000081059:ENSG00000112812:ENSG00000184185
DEG.down	Whole_Blood	5721	15	1	1	ENSG00000054282:ENSG00000167632:ENSG00000130713:ENSG00000133265:ENSG00000205362:ENSG00000177853:ENSG00000167641:ENSG00000177374:ENSG00000185024:ENSG00000108406:ENSG00000143367:ENSG00000134824:ENSG00000123119:ENSG00000104549:ENSG00000152078
DEG.twoside	Adipose_Visceral_Omentum	2605	25	0.0721844	1	ENSG00000163624:ENSG00000204314:ENSG00000205362:ENSG00000219438:ENSG00000167641:ENSG00000204103:ENSG00000005513:ENSG00000110446:ENSG00000169594:ENSG00000197702:ENSG00000177374:ENSG00000104381:ENSG00000172915:ENSG00000197977:ENSG00000112796:ENSG00000130700:ENSG00000146678:ENSG00000123119:ENSG00000112812:ENSG00000134253:ENSG00000104177:ENSG00000137285:ENSG00000104549:ENSG00000101057:ENSG00000152078
DEG.twoside	Adrenal_Gland	3796	22	0.896758	1	ENSG00000106038:ENSG00000119042:ENSG00000231609:ENSG00000204314:ENSG00000196482:ENSG00000127561:ENSG00000219438:ENSG00000167641:ENSG00000163497:ENSG00000183770:ENSG00000005513:ENSG00000110446:ENSG00000156345:ENSG00000112837:ENSG00000134245:ENSG00000145569:ENSG00000130700:ENSG00000113248:ENSG00000134824:ENSG00000123119:ENSG00000112812:ENSG00000137285
DEG.twoside	Artery_Aorta	3128	26	0.227472	1	ENSG00000105131:ENSG00000231609:ENSG00000092607:ENSG00000205362:ENSG00000219438:ENSG00000167641:ENSG00000198353:ENSG00000156345:ENSG00000197702:ENSG00000177374:ENSG00000112837:ENSG00000104381:ENSG00000126778:ENSG00000149380:ENSG00000081059:ENSG00000113248:ENSG00000145248:ENSG00000134824:ENSG00000011275:ENSG00000104369:ENSG00000104177:ENSG00000262576:ENSG00000137285:ENSG00000184185:ENSG00000152503…
DEG.twoside	Artery_Coronary	2268	24	0.0298897	1	ENSG00000134762:ENSG00000092607:ENSG00000205362:ENSG00000167641:ENSG00000198353:ENSG00000204103:ENSG00000110446:ENSG00000197702:ENSG00000112837:ENSG00000104381:ENSG00000126778:ENSG00000143367:ENSG00000149380:ENSG00000081059:ENSG00000112796:ENSG00000113248:ENSG00000134824:ENSG00000104177:ENSG00000262576:ENSG00000104549:ENSG00000164532:ENSG00000184185:ENSG00000101057:ENSG00000152078
DEG.twoside	Artery_Tibial	3578	28	0.329081	1	ENSG00000105131:ENSG00000231609:ENSG00000134762:ENSG00000092607:ENSG00000205362:ENSG00000219438:ENSG00000167641:ENSG00000095777:ENSG00000198353:ENSG00000168779:ENSG00000005513:ENSG00000123388:ENSG00000197702:ENSG00000112837:ENSG00000104381:ENSG00000108406:ENSG00000149380:ENSG00000180318:ENSG00000153956:ENSG00000100985:ENSG00000145569:ENSG00000135903:ENSG00000112796:ENSG00000011275:ENSG00000104177…
DEG.twoside	Bladder	765	10	0.0474971	1	ENSG00000164093:ENSG00000167641:ENSG00000198353:ENSG00000156345:ENSG00000197702:ENSG00000177374:ENSG00000143367:ENSG00000149380:ENSG00000130700:ENSG00000134253
DEG.twoside	Brain_Amygdala	7704	45	0.977711	1	ENSG00000100644:ENSG00000167632:ENSG00000119042:ENSG00000231609:ENSG00000130713:ENSG00000043355:ENSG00000204314:ENSG00000176165:ENSG00000186960:ENSG00000205362:ENSG00000136750:ENSG00000177853:ENSG00000127561:ENSG00000144355:ENSG00000128610:ENSG00000136535:ENSG00000219438:ENSG00000204103:ENSG00000005513:ENSG00000112333:ENSG00000110446:ENSG00000145428:ENSG00000007372:ENSG00000197702:ENSG00000177374…
DEG.twoside	Brain_Anterior_cingulate_cortex_BA24	7188	49	0.71024	1	ENSG00000054282:ENSG00000100644:ENSG00000119042:ENSG00000152977:ENSG00000130713:ENSG00000043355:ENSG00000204314:ENSG00000176165:ENSG00000186960:ENSG00000205362:ENSG00000136750:ENSG00000177853:ENSG00000127561:ENSG00000144355:ENSG00000136535:ENSG00000219438:ENSG00000204103:ENSG00000005513:ENSG00000112333:ENSG00000110446:ENSG00000145428:ENSG00000007372:ENSG00000159248:ENSG00000146352:ENSG00000197702…
DEG.twoside	Brain_Caudate_basal_ganglia	7173	47	0.819516	1	ENSG00000119042:ENSG00000231609:ENSG00000152977:ENSG00000130713:ENSG00000204314:ENSG00000173404:ENSG00000176165:ENSG00000186960:ENSG00000205362:ENSG00000136750:ENSG00000177853:ENSG00000127561:ENSG00000144355:ENSG00000128610:ENSG00000219438:ENSG00000204103:ENSG00000005513:ENSG00000112333:ENSG00000110446:ENSG00000145428:ENSG00000007372:ENSG00000159248:ENSG00000146352:ENSG00000197702:ENSG00000177374…
DEG.twoside	Brain_Cerebellar_Hemisphere	5937	47	0.217083	1	ENSG00000163624:ENSG00000231609:ENSG00000152977:ENSG00000130713:ENSG00000043355:ENSG00000204314:ENSG00000173404:ENSG00000196482:ENSG00000174963:ENSG00000205362:ENSG00000136750:ENSG00000127561:ENSG00000170615:ENSG00000219438:ENSG00000167641:ENSG00000204103:ENSG00000005513:ENSG00000110446:ENSG00000145428:ENSG00000007372:ENSG00000146352:ENSG00000156345:ENSG00000197702:ENSG00000177374:ENSG00000180929…
DEG.twoside	Brain_Cerebellum	5890	51	0.0533315	1	ENSG00000167632:ENSG00000163624:ENSG00000231609:ENSG00000152977:ENSG00000130713:ENSG00000043355:ENSG00000204314:ENSG00000173404:ENSG00000196482:ENSG00000174963:ENSG00000205362:ENSG00000136750:ENSG00000127561:ENSG00000170615:ENSG00000219438:ENSG00000167641:ENSG00000204103:ENSG00000005513:ENSG00000110446:ENSG00000145428:ENSG00000112038:ENSG00000007372:ENSG00000146352:ENSG00000156345:ENSG00000197702…
DEG.twoside	Brain_Cortex	6494	49	0.347788	1	ENSG00000100644:ENSG00000119042:ENSG00000152977:ENSG00000043355:ENSG00000204314:ENSG00000176165:ENSG00000186960:ENSG00000205362:ENSG00000136750:ENSG00000177853:ENSG00000127561:ENSG00000144355:ENSG00000136535:ENSG00000219438:ENSG00000204103:ENSG00000005513:ENSG00000112333:ENSG00000110446:ENSG00000145428:ENSG00000007372:ENSG00000159248:ENSG00000146352:ENSG00000156345:ENSG00000197702:ENSG00000177374…
DEG.twoside	Brain_Frontal_Cortex_BA9	6255	52	0.0982038	1	ENSG00000119042:ENSG00000163624:ENSG00000152977:ENSG00000043355:ENSG00000204314:ENSG00000196482:ENSG00000176165:ENSG00000186960:ENSG00000205362:ENSG00000136750:ENSG00000177853:ENSG00000127561:ENSG00000144355:ENSG00000136535:ENSG00000219438:ENSG00000204103:ENSG00000005513:ENSG00000112333:ENSG00000110446:ENSG00000145428:ENSG00000007372:ENSG00000159248:ENSG00000146352:ENSG00000156345:ENSG00000197702…
DEG.twoside	Brain_Hippocampus	7629	47	0.936709	1	ENSG00000100644:ENSG00000167632:ENSG00000231609:ENSG00000152977:ENSG00000130713:ENSG00000043355:ENSG00000204314:ENSG00000176165:ENSG00000186960:ENSG00000205362:ENSG00000136750:ENSG00000177853:ENSG00000127561:ENSG00000144355:ENSG00000136535:ENSG00000219438:ENSG00000204103:ENSG00000005513:ENSG00000112333:ENSG00000110446:ENSG00000145428:ENSG00000104951:ENSG00000146352:ENSG00000197702:ENSG00000177374…
DEG.twoside	Brain_Hypothalamus	6649	48	0.504637	1	ENSG00000119042:ENSG00000231609:ENSG00000152977:ENSG00000130713:ENSG00000043355:ENSG00000188909:ENSG00000204314:ENSG00000173404:ENSG00000174963:ENSG00000205362:ENSG00000136750:ENSG00000177853:ENSG00000127561:ENSG00000144355:ENSG00000128610:ENSG00000219438:ENSG00000168779:ENSG00000204103:ENSG00000005513:ENSG00000112333:ENSG00000110446:ENSG00000145428:ENSG00000146352:ENSG00000197702:ENSG00000177374…
DEG.twoside	Brain_Nucleus_accumbens_basal_ganglia	6969	48	0.672671	1	ENSG00000100644:ENSG00000231609:ENSG00000152977:ENSG00000130713:ENSG00000204314:ENSG00000173404:ENSG00000176165:ENSG00000186960:ENSG00000205362:ENSG00000136750:ENSG00000177853:ENSG00000127561:ENSG00000144355:ENSG00000128610:ENSG00000219438:ENSG00000095777:ENSG00000163497:ENSG00000204103:ENSG00000005513:ENSG00000112333:ENSG00000110446:ENSG00000145428:ENSG00000146352:ENSG00000156345:ENSG00000197702…
DEG.twoside	Brain_Putamen_basal_ganglia	7676	44	0.984678	1	ENSG00000054282:ENSG00000100644:ENSG00000231609:ENSG00000152977:ENSG00000130713:ENSG00000204314:ENSG00000173404:ENSG00000176165:ENSG00000186960:ENSG00000205362:ENSG00000136750:ENSG00000177853:ENSG00000127561:ENSG00000144355:ENSG00000128610:ENSG00000219438:ENSG00000163497:ENSG00000204103:ENSG00000005513:ENSG00000112333:ENSG00000110446:ENSG00000145428:ENSG00000007372:ENSG00000197702:ENSG00000177374…
DEG.twoside	Brain_Spinal_cord_cervical_c-1	5618	32	0.958668	1	ENSG00000163624:ENSG00000152977:ENSG00000130713:ENSG00000043355:ENSG00000174963:ENSG00000205362:ENSG00000127561:ENSG00000219438:ENSG00000167641:ENSG00000204103:ENSG00000005513:ENSG00000173253:ENSG00000156345:ENSG00000197702:ENSG00000177374:ENSG00000180929:ENSG00000112837:ENSG00000104381:ENSG00000172915:ENSG00000197977:ENSG00000143367:ENSG00000142700:ENSG00000134824:ENSG00000174469:ENSG00000123119…
DEG.twoside	Brain_Substantia_nigra	7090	48	0.72948	1	ENSG00000119042:ENSG00000231609:ENSG00000152977:ENSG00000130713:ENSG00000196482:ENSG00000205362:ENSG00000136750:ENSG00000177853:ENSG00000127561:ENSG00000128610:ENSG00000219438:ENSG00000167641:ENSG00000198353:ENSG00000204103:ENSG00000005513:ENSG00000112333:ENSG00000110446:ENSG00000156345:ENSG00000197702:ENSG00000177374:ENSG00000180929:ENSG00000104381:ENSG00000064961:ENSG00000134245:ENSG00000172915…
DEG.twoside	Breast_Mammary_Tissue	2176	20	0.141953	1	ENSG00000092607:ENSG00000205362:ENSG00000170615:ENSG00000219438:ENSG00000168779:ENSG00000204103:ENSG00000005513:ENSG00000145428:ENSG00000173253:ENSG00000197702:ENSG00000177374:ENSG00000135903:ENSG00000134824:ENSG00000123119:ENSG00000104369:ENSG00000104177:ENSG00000104549:ENSG00000184185:ENSG00000152503:ENSG00000101057
DEG.twoside	Cells_Cultured_fibroblasts	4899	39	0.239971	1	ENSG00000167632:ENSG00000119042:ENSG00000164093:ENSG00000152977:ENSG00000130713:ENSG00000204314:ENSG00000092607:ENSG00000174963:ENSG00000205362:ENSG00000127561:ENSG00000144355:ENSG00000219438:ENSG00000167641:ENSG00000198353:ENSG00000168779:ENSG00000204103:ENSG00000123388:ENSG00000110446:ENSG00000156345:ENSG00000169594:ENSG00000197702:ENSG00000112837:ENSG00000134245:ENSG00000172915:ENSG00000108406…
DEG.twoside	Cells_EBV-transformed_lymphocytes	5356	19	0.999986	1	ENSG00000231609:ENSG00000134762:ENSG00000130713:ENSG00000162676:ENSG00000110446:ENSG00000104951:ENSG00000177374:ENSG00000078900:ENSG00000143367:ENSG00000100985:ENSG00000081059:ENSG00000134824:ENSG00000135638:ENSG00000123119:ENSG00000134253:ENSG00000104177:ENSG00000104549:ENSG00000184185:ENSG00000101057
DEG.twoside	Cervix_Ectocervix	178	0	1	1
DEG.twoside	Cervix_Endocervix	1582	9	0.810362	1	ENSG00000130713:ENSG00000219438:ENSG00000167641:ENSG00000168779:ENSG00000183770:ENSG00000156345:ENSG00000197702:ENSG00000113248:ENSG00000134824
DEG.twoside	Colon_Sigmoid	2553	21	0.277647	1	ENSG00000163624:ENSG00000231609:ENSG00000172238:ENSG00000113196:ENSG00000167641:ENSG00000110446:ENSG00000197702:ENSG00000177374:ENSG00000174279:ENSG00000104381:ENSG00000172915:ENSG00000197977:ENSG00000153956:ENSG00000100985:ENSG00000123119:ENSG00000011275:ENSG00000104369:ENSG00000137285:ENSG00000104549:ENSG00000258986:ENSG00000184185
DEG.twoside	Colon_Transverse	2303	13	0.85786	1	ENSG00000119042:ENSG00000127561:ENSG00000172238:ENSG00000113196:ENSG00000198353:ENSG00000162676:ENSG00000005513:ENSG00000104381:ENSG00000145569:ENSG00000112796:ENSG00000134824:ENSG00000112812:ENSG00000184185
DEG.twoside	Esophagus_Gastroesophageal_Junction	2196	21	0.0992627	1	ENSG00000119042:ENSG00000163624:ENSG00000164093:ENSG00000092607:ENSG00000167641:ENSG00000168779:ENSG00000005513:ENSG00000110446:ENSG00000197702:ENSG00000177374:ENSG00000104381:ENSG00000172915:ENSG00000100985:ENSG00000081059:ENSG00000145569:ENSG00000123119:ENSG00000011275:ENSG00000104369:ENSG00000104177:ENSG00000104549:ENSG00000184185
DEG.twoside	Esophagus_Mucosa	4443	32	0.518929	1	ENSG00000105131:ENSG00000163624:ENSG00000134762:ENSG00000204314:ENSG00000205362:ENSG00000219438:ENSG00000198353:ENSG00000204103:ENSG00000005513:ENSG00000110446:ENSG00000156345:ENSG00000169594:ENSG00000177374:ENSG00000112837:ENSG00000104381:ENSG00000172915:ENSG00000078900:ENSG00000125285:ENSG00000143367:ENSG00000153956:ENSG00000100985:ENSG00000145569:ENSG00000142700:ENSG00000113248:ENSG00000134824…
DEG.twoside	Esophagus_Muscularis	2387	21	0.182447	1	ENSG00000119042:ENSG00000163624:ENSG00000164093:ENSG00000092607:ENSG00000219438:ENSG00000167641:ENSG00000168779:ENSG00000110446:ENSG00000197702:ENSG00000177374:ENSG00000104381:ENSG00000100985:ENSG00000081059:ENSG00000145569:ENSG00000112796:ENSG00000113248:ENSG00000123119:ENSG00000011275:ENSG00000104177:ENSG00000104549:ENSG00000184185
DEG.twoside	Fallopian_Tube	424	4	0.36063	1	ENSG00000130713:ENSG00000198353:ENSG00000197702:ENSG00000177374
DEG.twoside	Heart_Atrial_Appendage	7223	27	1	1	ENSG00000054282:ENSG00000130713:ENSG00000204314:ENSG00000092607:ENSG00000196482:ENSG00000177853:ENSG00000219438:ENSG00000167641:ENSG00000204103:ENSG00000110446:ENSG00000159248:ENSG00000156345:ENSG00000185024:ENSG00000104381:ENSG00000064961:ENSG00000134245:ENSG00000108406:ENSG00000143367:ENSG00000100985:ENSG00000081059:ENSG00000112796:ENSG00000134824:ENSG00000104177:ENSG00000137285:ENSG00000104549…
DEG.twoside	Heart_Left_Ventricle	8103	30	1	1	ENSG00000054282:ENSG00000100644:ENSG00000167632:ENSG00000130713:ENSG00000204314:ENSG00000196482:ENSG00000133265:ENSG00000205362:ENSG00000177853:ENSG00000113196:ENSG00000167641:ENSG00000204103:ENSG00000005513:ENSG00000110446:ENSG00000156345:ENSG00000185024:ENSG00000112837:ENSG00000064961:ENSG00000172915:ENSG00000108406:ENSG00000143367:ENSG00000100985:ENSG00000112796:ENSG00000113248:ENSG00000134824…
DEG.twoside	Kidney_Cortex	5453	26	0.997141	1	ENSG00000130713:ENSG00000204314:ENSG00000196482:ENSG00000219438:ENSG00000198353:ENSG00000005513:ENSG00000110446:ENSG00000173253:ENSG00000185024:ENSG00000104381:ENSG00000134245:ENSG00000172915:ENSG00000180318:ENSG00000153956:ENSG00000145569:ENSG00000130700:ENSG00000113248:ENSG00000112246:ENSG00000134824:ENSG00000135638:ENSG00000123119:ENSG00000011275:ENSG00000104369:ENSG00000256463:ENSG00000184185…
DEG.twoside	Kidney_Medulla	90	0	1	1
DEG.twoside	Liver	7534	27	1	1	ENSG00000054282:ENSG00000100644:ENSG00000167632:ENSG00000119042:ENSG00000130713:ENSG00000204314:ENSG00000133265:ENSG00000205362:ENSG00000177853:ENSG00000219438:ENSG00000167641:ENSG00000110446:ENSG00000156345:ENSG00000197702:ENSG00000177374:ENSG00000185024:ENSG00000119547:ENSG00000104381:ENSG00000108406:ENSG00000197977:ENSG00000143367:ENSG00000100985:ENSG00000081059:ENSG00000146678:ENSG00000011275…
DEG.twoside	Lung	3566	32	0.0911543	1	ENSG00000054282:ENSG00000105131:ENSG00000119042:ENSG00000231609:ENSG00000204314:ENSG00000092607:ENSG00000205362:ENSG00000127561:ENSG00000219438:ENSG00000167641:ENSG00000198353:ENSG00000162676:ENSG00000204103:ENSG00000005513:ENSG00000110446:ENSG00000173253:ENSG00000197702:ENSG00000177374:ENSG00000104381:ENSG00000134245:ENSG00000172915:ENSG00000153956:ENSG00000100985:ENSG00000145569:ENSG00000130700…
DEG.twoside	Minor_Salivary_Gland	2673	23	0.196137	1	ENSG00000163624:ENSG00000164093:ENSG00000134762:ENSG00000204314:ENSG00000167641:ENSG00000110446:ENSG00000115507:ENSG00000177374:ENSG00000112837:ENSG00000104381:ENSG00000134245:ENSG00000126778:ENSG00000078900:ENSG00000143367:ENSG00000180318:ENSG00000153956:ENSG00000145569:ENSG00000135903:ENSG00000113248:ENSG00000123119:ENSG00000112812:ENSG00000104177:ENSG00000184185
DEG.twoside	Muscle_Skeletal	6344	30	0.999132	1	ENSG00000054282:ENSG00000100644:ENSG00000119042:ENSG00000164093:ENSG00000130713:ENSG00000092607:ENSG00000177853:ENSG00000167641:ENSG00000168779:ENSG00000204103:ENSG00000005513:ENSG00000188716:ENSG00000110446:ENSG00000156345:ENSG00000197702:ENSG00000177374:ENSG00000185024:ENSG00000104381:ENSG00000064961:ENSG00000172915:ENSG00000108406:ENSG00000126778:ENSG00000143367:ENSG00000153956:ENSG00000134824…
DEG.twoside	Nerve_Tibial	4492	28	0.834157	1	ENSG00000054282:ENSG00000231609:ENSG00000134762:ENSG00000130713:ENSG00000092607:ENSG00000205362:ENSG00000177853:ENSG00000219438:ENSG00000198353:ENSG00000168779:ENSG00000005513:ENSG00000110446:ENSG00000197702:ENSG00000177374:ENSG00000185024:ENSG00000112837:ENSG00000134245:ENSG00000143367:ENSG00000100985:ENSG00000081059:ENSG00000112796:ENSG00000113248:ENSG00000134824:ENSG00000134253:ENSG00000104177…
DEG.twoside	Ovary	4593	28	0.868447	1	ENSG00000231609:ENSG00000134762:ENSG00000130713:ENSG00000204314:ENSG00000176165:ENSG00000177853:ENSG00000167641:ENSG00000198353:ENSG00000204103:ENSG00000183770:ENSG00000005513:ENSG00000110446:ENSG00000156345:ENSG00000197702:ENSG00000177374:ENSG00000134245:ENSG00000172915:ENSG00000108406:ENSG00000121454:ENSG00000100985:ENSG00000081059:ENSG00000113248:ENSG00000146678:ENSG00000134253:ENSG00000104177…
DEG.twoside	Pancreas	8344	36	0.999998	1	ENSG00000054282:ENSG00000100644:ENSG00000167632:ENSG00000119042:ENSG00000163624:ENSG00000231609:ENSG00000130713:ENSG00000204314:ENSG00000133265:ENSG00000205362:ENSG00000136750:ENSG00000177853:ENSG00000219438:ENSG00000167641:ENSG00000162676:ENSG00000204103:ENSG00000005513:ENSG00000110446:ENSG00000159248:ENSG00000156345:ENSG00000177374:ENSG00000185024:ENSG00000119547:ENSG00000104381:ENSG00000064961…
DEG.twoside	Prostate	2491	24	0.0749691	1	ENSG00000106038:ENSG00000105131:ENSG00000198353:ENSG00000163497:ENSG00000005513:ENSG00000146352:ENSG00000177374:ENSG00000174279:ENSG00000134245:ENSG00000126778:ENSG00000078900:ENSG00000149380:ENSG00000100985:ENSG00000145569:ENSG00000112796:ENSG00000130700:ENSG00000134824:ENSG00000174469:ENSG00000112812:ENSG00000134253:ENSG00000137285:ENSG00000256463:ENSG00000152503:ENSG00000101057
DEG.twoside	Skin_Not_Sun_Exposed_Suprapubic	3993	30	0.414201	1	ENSG00000105131:ENSG00000163624:ENSG00000134762:ENSG00000204314:ENSG00000219438:ENSG00000167641:ENSG00000204103:ENSG00000123388:ENSG00000110446:ENSG00000115507:ENSG00000169594:ENSG00000177374:ENSG00000104381:ENSG00000134245:ENSG00000172915:ENSG00000078900:ENSG00000125285:ENSG00000143367:ENSG00000153956:ENSG00000145569:ENSG00000135903:ENSG00000112796:ENSG00000113248:ENSG00000123119:ENSG00000112812…
DEG.twoside	Skin_Sun_Exposed_Lower_leg	3928	34	0.121218	1	ENSG00000105131:ENSG00000163624:ENSG00000152977:ENSG00000134762:ENSG00000204314:ENSG00000219438:ENSG00000167641:ENSG00000198353:ENSG00000204103:ENSG00000123388:ENSG00000110446:ENSG00000115507:ENSG00000169594:ENSG00000177374:ENSG00000104381:ENSG00000134245:ENSG00000172915:ENSG00000078900:ENSG00000125285:ENSG00000143367:ENSG00000149380:ENSG00000153956:ENSG00000100985:ENSG00000145569:ENSG00000135903…
DEG.twoside	Small_Intestine_Terminal_Ileum	2862	22	0.392506	1	ENSG00000119042:ENSG00000163624:ENSG00000172238:ENSG00000113196:ENSG00000219438:ENSG00000198353:ENSG00000162676:ENSG00000163497:ENSG00000110446:ENSG00000104381:ENSG00000153956:ENSG00000100985:ENSG00000081059:ENSG00000145569:ENSG00000112796:ENSG00000130700:ENSG00000134824:ENSG00000123119:ENSG00000112812:ENSG00000134253:ENSG00000104369:ENSG00000101057
DEG.twoside	Spleen	4213	25	0.887538	1	ENSG00000119042:ENSG00000163624:ENSG00000231609:ENSG00000204314:ENSG00000205362:ENSG00000127561:ENSG00000198353:ENSG00000162676:ENSG00000204103:ENSG00000005513:ENSG00000110446:ENSG00000156345:ENSG00000197702:ENSG00000104381:ENSG00000134245:ENSG00000172915:ENSG00000143367:ENSG00000153956:ENSG00000100985:ENSG00000081059:ENSG00000145569:ENSG00000134824:ENSG00000123119:ENSG00000112812:ENSG00000101057
DEG.twoside	Stomach	2784	17	0.799696	1	ENSG00000119042:ENSG00000204314:ENSG00000196482:ENSG00000219438:ENSG00000204103:ENSG00000005513:ENSG00000104381:ENSG00000125285:ENSG00000153956:ENSG00000100985:ENSG00000130700:ENSG00000134824:ENSG00000123119:ENSG00000112812:ENSG00000104369:ENSG00000137285:ENSG00000184185
DEG.twoside	Testis	7445	48	0.862242	1	ENSG00000106038:ENSG00000163624:ENSG00000125816:ENSG00000043355:ENSG00000092607:ENSG00000176165:ENSG00000186960:ENSG00000205362:ENSG00000177853:ENSG00000128610:ENSG00000219438:ENSG00000167641:ENSG00000095777:ENSG00000204103:ENSG00000110446:ENSG00000112038:ENSG00000104951:ENSG00000156345:ENSG00000169594:ENSG00000197702:ENSG00000177374:ENSG00000185024:ENSG00000174279:ENSG00000112837:ENSG00000139800…
DEG.twoside	Thyroid	4227	29	0.640118	1	ENSG00000054282:ENSG00000167632:ENSG00000163624:ENSG00000092607:ENSG00000196482:ENSG00000205362:ENSG00000177853:ENSG00000144355:ENSG00000170615:ENSG00000219438:ENSG00000167641:ENSG00000198353:ENSG00000168779:ENSG00000204103:ENSG00000005513:ENSG00000156345:ENSG00000112837:ENSG00000108406:ENSG00000149380:ENSG00000121454:ENSG00000081059:ENSG00000112796:ENSG00000134824:ENSG00000112812:ENSG00000134253…
DEG.twoside	Uterus	4303	30	0.602391	1	ENSG00000105131:ENSG00000156150:ENSG00000163624:ENSG00000231609:ENSG00000130713:ENSG00000177853:ENSG00000167641:ENSG00000198353:ENSG00000183770:ENSG00000005513:ENSG00000146352:ENSG00000156345:ENSG00000197702:ENSG00000177374:ENSG00000185024:ENSG00000172915:ENSG00000108406:ENSG00000149380:ENSG00000121454:ENSG00000180318:ENSG00000100985:ENSG00000081059:ENSG00000130700:ENSG00000113248:ENSG00000134824…
DEG.twoside	Vagina	2415	24	0.0561484	1	ENSG00000106038:ENSG00000105131:ENSG00000163624:ENSG00000164093:ENSG00000134762:ENSG00000127561:ENSG00000198353:ENSG00000204103:ENSG00000183770:ENSG00000005513:ENSG00000169594:ENSG00000174279:ENSG00000134245:ENSG00000078900:ENSG00000143367:ENSG00000100985:ENSG00000112796:ENSG00000130700:ENSG00000104177:ENSG00000256463:ENSG00000104549:ENSG00000184185:ENSG00000152503:ENSG00000152078
DEG.twoside	Whole_Blood	6935	22	1	1	ENSG00000054282:ENSG00000167632:ENSG00000130713:ENSG00000133265:ENSG00000205362:ENSG00000177853:ENSG00000167641:ENSG00000162676:ENSG00000110446:ENSG00000145428:ENSG00000177374:ENSG00000185024:ENSG00000108406:ENSG00000143367:ENSG00000100985:ENSG00000081059:ENSG00000145569:ENSG00000134824:ENSG00000123119:ENSG00000104549:ENSG00000101057:ENSG00000152078
Annotations		Average log2 transcripts per million for each tissue gene set
ENSEMBL ID	Gene Symbol	Adipose_Subcutaneous	Adipose_Visceral_Omentum	Adrenal_Gland	Artery_Aorta	Artery_Coronary	Artery_Tibial	Bladder	Brain_Amygdala	Brain_Anterior_cingulate_cortex_BA24	Brain_Caudate_basal_ganglia	Brain_Cerebellar_Hemisphere	Brain_Cerebellum	Brain_Cortex	Brain_Frontal_Cortex_BA9	Brain_Hippocampus	Brain_Hypothalamus	Brain_Nucleus_accumbens_basal_ganglia	Brain_Putamen_basal_ganglia	Brain_Spinal_cord_cervical_c-1	Brain_Substantia_nigra	Breast_Mammary_Tissue	Cells_Cultured_fibroblasts	Cells_EBV-transformed_lymphocytes	Cervix_Ectocervix	Cervix_Endocervix	Colon_Sigmoid	Colon_Transverse	Esophagus_Gastroesophageal_Junction	Esophagus_Mucosa	Esophagus_Muscularis	Fallopian_Tube	Heart_Atrial_Appendage	Heart_Left_Ventricle	Kidney_Cortex	Kidney_Medulla	Liver	Lung	Minor_Salivary_Gland	Muscle_Skeletal	Nerve_Tibial	Ovary	Pancreas	Pituitary	Prostate	Skin_Not_Sun_Exposed_Suprapubic	Skin_Sun_Exposed_Lower_leg	Small_Intestine_Terminal_Ileum	Spleen
ENSG00000078900	TP73	0.132396	0.136312	0.108713	0.174751	0.185466	0.125667	0.425875	0.678183	0.379989	0.674274	3.43303	3.59467	0.395917	0.337657	0.941379	0.863887	0.471146	0.33162	0.994696	0.602826	1.03896	0.153512	3.99584	1.02514	0.990304	0.151285	0.247762	0.125272	2.59402	0.121762	1.96213	0.127254	0.0934864	0.171443	0.193482	0.20624	1.20447	2.38319	0.283983	0.470154	0.449002	0.270294	0.701649	2.41201	3.05634	3.14123	0.410834	1.0469
ENSG00000142700	DMRTA2	0.0301659	0.0269391	0.0356334	0.067735	0.053392	0.0511366	0.0326847	0.211823	0.172285	0.0893845	0.372783	0.403218	0.220316	0.187891	0.493048	0.330658	0.167406	0.109485	0.957396	0.34713	0.028134	0.014999	0.0360139	0.0724104	0.0538209	0.0356142	0.0428935	0.0349993	1.62907	0.0382231	0.0480742	0.0199849	0.0144116	0.0185011	0.0224491	0.00586705	0.0574961	0.442184	0.0145381	0.0307154	0.0620263	0.00950976	2.21192	0.0686074	0.0187137	0.0238367	0.0476441	0.0285802
ENSG00000162676	GFI1	0.783233	1.28614	0.460876	0.864724	0.986881	0.414754	1.26348	0.122273	0.0893414	0.0960855	0.076229	0.10415	0.123269	0.109709	0.139559	0.175279	0.0963704	0.0917385	0.441634	0.163474	0.850941	0.142258	3.73208	1.05482	1.12723	0.673525	1.91561	0.598823	0.793079	0.648743	1.3904	0.362957	0.173234	0.632633	0.490447	0.568153	2.50289	1.09422	0.121581	0.823843	0.54689	2.7407	0.883557	1.25739	0.493574	0.573301	2.97999	3.48175
ENSG00000152078	TMEM56	2.54836	1.99847	3.06253	3.36597	3.20851	3.12446	3.17288	2.54414	2.91225	2.69273	4.33814	3.84433	2.93987	3.44267	2.06785	2.08636	2.67158	2.43099	2.5228	1.98887	2.08958	0.303271	0.282441	2.0009	2.21566	2.78321	3.07307	2.46349	0.874533	2.37287	2.58064	3.35133	2.72475	1.36546	1.78642	4.76773	1.87004	2.70867	2.61219	2.44482	1.75671	2.19562	2.95426	2.39107	1.5474	1.19165	2.3462	0.884538
ENSG00000156150	ALX3	0.0213197	0.0484461	0.0211056	0.0884753	0.0226169	0.0182924	0.124941	0.224291	0.284786	0.2682	0.23168	0.259358	0.412254	0.306572	0.204894	0.313885	0.232599	0.20788	0.0234365	0.0371961	0.326408	0.0151789	0.0206957	0.0380933	0.371695	0.0125733	0.0112922	0.0220045	0.0509885	0.0224179	0.89104	0.017437	0.00693782	0.00666276	0	0.0058826	0.0369339	0.449964	0.0117205	0.0219089	0.172529	0.0100063	1.29571	0.18411	0.441363	0.147486	0.0150049	0.0165579
ENSG00000134245	WNT2B	2.20726	2.31462	1.33524	2.70453	2.02782	1.82683	2.67281	0.989629	1.03476	1.80969	2.05236	2.11575	1.55045	1.51186	0.96824	1.1702	1.84996	1.53807	1.66688	1.09693	1.9646	1.47241	0.455419	3.43905	2.94527	1.9815	2.47778	2.15348	2.50277	2.10589	2.75666	1.63324	0.953337	1.22013	1.2602	0.541328	2.97238	1.54694	0.805852	3.10747	3.94329	0.83825	1.88474	2.70627	3.34883	3.236	2.50566	1.41498
ENSG00000134253	TRIM45	2.22819	1.77348	2.96477	2.92767	2.37029	2.34005	3.59903	1.78824	1.86846	1.81541	1.889	2.08278	2.40646	2.13626	1.79331	1.94005	2.06623	1.64417	2.3346	1.79029	2.8779	2.3596	1.21664	3.40287	3.73584	3.04355	2.29713	2.65609	1.77431	2.71117	4.11911	3.18087	2.31606	2.17132	2.85555	0.873288	2.09355	2.66949	3.2693	3.83567	3.81157	2.79533	3.98309	3.86925	2.67232	2.47514	2.23571	2.35953
ENSG00000092607	TBX15	5.45931	2.07451	0.204235	1.45781	2.29134	5.55726	0.662308	0.517761	0.607343	0.630111	0.419327	0.522161	0.743215	0.622175	0.569947	0.311009	0.351998	0.696734	0.308805	0.520698	4.64258	4.72341	2.19584	0.465315	0.436961	0.364281	0.28404	0.962143	0.183159	0.939365	0.877005	1.78212	0.63056	0.228201	0.720291	3.28854	1.04374	3.08837	5.63292	4.95352	0.343581	0.0864336	1.43878	0.446869	3.05212	3.77745	0.279845	0.151634
ENSG00000143367	TUFT1	3.18898	3.21619	3.36862	3.61102	2.98759	3.80158	4.5462	1.79073	2.30791	1.63498	4.21728	4.18544	2.67935	2.75944	1.66493	2.87847	1.74879	1.46985	1.75778	1.77257	3.67566	3.01459	0.955497	3.58002	3.37924	3.99387	4.08843	3.75275	5.50803	3.97184	3.72789	2.39756	1.73945	3.79687	3.81059	2.37971	4.02083	4.7636	1.59034	2.87123	4.02738	3.60953	3.83512	4.25268	5.6702	5.65581	3.5789	1.82152
ENSG00000121454	LHX4	1.13459	1.0362	1.13674	1.3024	1.22602	1.02812	1.4773	0.462496	0.564825	0.573963	2.14855	2.49309	0.909302	0.7349	0.494025	0.667879	0.653738	0.4103	0.66897	0.4124	1.33147	1.67533	1.65593	1.88452	1.86193	1.28315	1.45252	1.18615	1.2534	1.10948	1.78858	0.609508	0.444767	1.11749	1.11986	0.58701	1.37516	1.41039	0.456073	1.7968	2.02991	1.15743	2.10117	1.55928	1.39658	1.35529	1.67462	1.60381
ENSG00000196482	ESRRG	0.144951	0.105088	1.69488	0.0406507	0.202613	0.0257037	0.437552	0.815581	1.30983	0.918294	2.19121	2.07541	1.14998	1.72635	0.806392	0.912431	0.973367	0.794915	0.915382	1.235	0.526719	0.0288442	0.00827921	0.0801478	0.395423	0.347553	0.28148	0.578842	0.156961	1.12754	0.492822	1.76183	1.62241	2.19951	2.47736	0.146268	0.283688	0.60223	1.3049	0.650846	0.186789	1.04221	1.3717	1.14802	0.683349	0.819589	0.801114	0.491447
ENSG00000054282	SDCCAG8	3.70498	3.41119	3.07799	3.69568	3.6486	3.74235	3.39196	2.73445	2.66766	2.84584	3.07593	2.96573	2.74814	2.91491	2.74313	2.80414	2.69588	2.59337	3.35819	2.85386	3.66347	3.7421	3.48563	3.6559	3.78715	3.16381	2.83801	3.2101	2.89601	3.13762	3.68539	2.41123	1.73445	2.64718	2.91054	1.96484	3.85111	3.08448	2.60494	3.99727	3.8176	2.66676	3.71742	3.40676	3.17862	3.18731	2.99241	3.16432
ENSG00000231609	AC009501.4	2.24907	1.78582	1.43916	1.18769	1.81642	1.35589	1.92739	1.28931	1.62727	1.10346	2.93078	2.98035	1.85434	1.74872	1.22568	1.15302	1.22385	1.31093	0.668551	1.2055	1.91014	1.94529	1.19408	2.78392	2.78008	2.709	1.94111	2.34877	2.19237	2.39151	2.50257	0.934713	0.474278	0.912647	1.08568	1.93985	1.43612	2.3842	0.525478	4.46375	3.35133	1.06422	2.00465	1.9341	2.28024	2.33382	1.84245	1.34021
ENSG00000115507	OTX1	0.206776	0.107019	0.0513142	0.0400747	0.0626411	0.0356501	0.0395472	1.62515	1.81205	0.615808	0.0930987	0.0941194	1.95825	1.73361	1.28432	0.926038	0.800238	1.20974	0.0366556	1.07697	0.225326	0.247132	0.434628	0.103692	0.0804558	0.075411	0.0568407	0.0613333	1.17849	0.0558149	0.194434	0.0247487	0.0171938	0.0388678	0.00772526	0.0811976	0.408616	4.7931	0.0235645	0.240623	0.115342	0.251942	0.0732591	0.927193	3.61346	3.88872	0.0569179	0.31425
ENSG00000135638	EMX1	0.0382815	0.264517	0.0245978	0.0415994	0.0395247	0.0382702	0.0375338	1.57105	2.52754	0.0702637	0.0839692	0.0810812	3.2295	3.36836	1.71242	0.1141	0.0639341	0.0604652	0.0481721	0.0760004	0.0545739	0.0123675	1.97523	0.0333559	0.0480579	0.0836384	0.364204	0.0353229	0.126473	0.0490161	0.04003	0.0276082	0.014789	4.19967	4.49247	0.104363	0.0446937	0.143651	0.0672435	0.0667454	0.0976459	0.144852	0.307426	0.0412467	0.136703	0.147419	0.203177	0.0354127
ENSG00000136535	TBR1	0.0192521	0.0213886	0.0142511	0.0199491	0.0183616	0.0194591	0.0115741	2.57536	3.87263	0.109553	0.104295	0.0714742	4.51206	4.9739	2.09759	0.644865	0.184179	0.124985	0.143658	0.149795	0.0182457	0.0245952	0.0135243	0.00908687	0.0091341	0.0134501	0.0118365	0.017843	0.0184744	0.0137451	0.142903	0.00978769	0.0101438	0.0143276	0.0115208	0.0118442	0.025148	0.00961863	0.00957635	0.0201679	0.0129619	0.00752249	0.0842288	0.016095	0.0187658	0.0168215	0.0156816	0.0207401
ENSG00000144355	DLX1	0.187936	0.19419	0.321123	0.675493	0.834967	0.336576	0.403819	2.66946	3.41979	1.73624	0.0946031	0.068736	3.03791	3.2139	1.97894	3.52596	1.69141	1.83752	0.152104	0.335619	0.200626	2.26533	0.289144	0.708266	0.894088	1.19785	0.776159	0.61011	0.112318	0.576769	0.270888	0.304277	0.0751934	0.0876928	0.103891	0.0424025	0.072529	0.136079	0.157028	0.892175	0.264589	0.0692677	0.172618	0.38525	0.453676	0.867131	0.51902	0.0533474
ENSG00000174279	EVX2	0.0168006	0.00596429	0.00906195	0.00957265	0.00582398	0.0162038	0.125187	0.0125148	0.00878076	0.00157529	0.00291091	0.00302147	0.00530345	0.00702114	0.0064119	0.0117805	0.00485332	0.00137755	0.0924356	0.0415677	0.0173755	0.0264496	0.00469005	1.76479	1.21421	1.32564	0.0502707	0.00838722	0.0042637	0.00995326	0.0212581	0.00313821	0.002214	0.0127114	0.0166916	0.00256095	0.00324488	0.0034154	0.0181864	0.0202271	0.0298811	0.00232737	0.00249741	1.14009	0.00800655	0.00804214	0.0121662	0.00355428
ENSG00000119042	SATB2	2.17712	1.53876	2.56393	2.44844	1.72248	2.27425	1.74258	1.13942	2.76091	0.952866	0.639997	0.756226	3.21836	3.73149	1.65067	1.13416	0.761107	0.838287	2.41926	1.28759	1.97256	3.32915	0.0991068	2.45862	2.4371	1.57291	3.63571	1.36831	0.930246	1.36471	1.74443	0.5738	0.310741	1.43937	2.14996	1.30291	1.24868	1.49678	1.17826	2.41938	1.95059	1.32625	1.07649	1.95014	1.71036	1.77864	2.54363	1.01778
ENSG00000163497	FEV	0.0516504	0.122603	0.650566	0.0733325	0.0977228	0.0743694	0.11446	0.0700869	0.296693	0.957926	0.0487589	0.0537355	0.281025	0.391773	0.464095	0.227311	1.09155	1.24352	0.193384	0.239701	0.0895341	0.0154415	0.015488	0.0300178	0.150785	0.322625	0.887481	0.126858	0.0444082	0.129647	0.375404	0.0745696	0.0699133	0.040024	0.317973	0.0195534	0.0539385	0.079044	0.107308	0.09582	0.155332	0.776459	2.40508	1.97698	0.0327726	0.0302961	1.3511	0.0215714
ENSG00000135903	PAX3	0.657444	0.0226034	0.0129456	0.0178405	0.610821	1.29343	0.093615	0.0320092	0.0338496	0.0247854	1.70169	2.24545	0.0382177	0.0375613	0.021583	0.153897	0.0220873	0.0163195	1.02245	0.562886	1.11789	1.18179	0.166821	0.398109	0.43194	0.0151826	0.0135953	0.0144916	0.0231856	0.0147391	0.0889917	0.0852934	0.0114683	0.0179504	0.016534	0.00491114	0.0235703	2.54622	1.0409	0.0362862	0.0383343	0.0129002	0.07077	0.302903	1.73723	1.36645	0.0129486	0.00981321
ENSG00000163081	CCDC140	0.0640622	0.00304325	0.0017811	0.00301945	0.101515	0.242312	0.000961224	0.0106833	0.00255038	0.00176844	0.295661	0.381573	0.00498183	0.00267102	0.00434631	0.0283008	0.00179678	0.000953316	0.361952	0.113348	0.0989492	0.252435	0.0527838	0.03309	0.0175661	0.00209961	0.00223104	0.00230734	0.00136429	0.00271173	0.00494978	0.00833969	0.00169097	0.00136913	0	0.00126155	0.00660703	0.334311	0.192295	0.00405914	0.0056788	0.00328682	0.00477995	0.0143514	0.172186	0.078614	0.00387182	0.0172273
ENSG00000180929	GPR62	0.266115	0.352698	0.450537	0.368028	0.353167	0.318204	0.507907	2.45861	1.62897	2.63471	1.77674	1.96577	2.06762	1.96475	3.18564	2.75584	2.36659	2.91878	4.70391	3.23224	0.382695	0.12159	0.0777662	0.546676	0.531611	0.438735	0.242117	0.373024	0.204702	0.356301	0.752871	0.468732	0.219107	0.291605	0.364659	0.227606	0.203224	0.233127	0.63263	0.676618	0.672323	0.0971372	0.905001	0.524101	0.334647	0.319747	0.217774	0.204919
ENSG00000183770	FOXL2	0.0455708	0.105843	2.07776	0.096416	0.14093	0.174962	0.0607503	0.41185	0.451811	0.507176	0.329302	0.514951	0.627259	0.544313	0.489089	0.525778	0.410123	0.519484	0.622223	0.680306	0.133335	0.896771	0.0135596	4.14572	5.00122	0.0486218	0.0331048	0.0629848	0.160552	0.0702544	4.4557	0.0194661	0.0229206	0.0174387	0.0631623	0.021627	0.0299625	0.0592815	0.0295905	0.0433977	5.44772	0.170088	4.15442	0.330169	0.248054	0.148227	0.0325171	0.0313016
ENSG00000174963	ZIC4	1.20716	0.0126147	0.0440382	0.196151	0.217138	0.131875	0.00662983	0.722572	1.34943	1.34399	5.64154	5.6656	1.45873	1.21163	1.19554	2.12773	1.80691	1.26791	2.06543	1.28111	0.0803145	2.04001	0.0168386	0.0132546	0.00397936	0.0194492	0.0168333	0.0265043	0.0229664	0.021578	0.00500807	0.0154707	0.0097231	0.0111098	0.00599125	0.321858	0.0381962	0.100427	0.444204	0.0776987	0.0547026	0.0225552	0.509187	0.0261018	0.0592025	0.653057	0.0419464	0.0174397
ENSG00000152977	ZIC1	1.50888	0.0350807	0.102471	0.380848	0.237922	0.225552	0.015277	1.78373	2.6851	2.66499	5.66032	5.67243	2.91235	2.66285	2.575	3.25882	3.03878	2.74645	3.31039	2.46602	0.160476	3.1703	0.042656	0.0233351	0.0190521	0.0517831	0.0560198	0.0653312	0.0602989	0.0600524	0.0786423	0.0469816	0.0320491	0.0343406	0.0648809	1.63243	0.110137	0.215046	1.37909	0.189255	0.160939	0.0379691	1.01168	0.0753234	0.149626	1.27188	0.178212	0.0509876
ENSG00000168779	SHOX2	4.13185	0.601381	0.144239	1.87942	2.53694	4.74093	0.638073	0.0451795	0.0457884	0.042646	0.0918732	0.076148	0.0635463	0.0669515	0.0431813	0.549912	0.0572341	0.0315761	0.191402	0.292077	3.54586	4.5327	1.44713	3.35991	3.51091	0.223868	0.199191	1.14353	0.108398	1.03754	0.712886	1.95623	0.456675	0.0534478	0.0355631	0.0471347	0.512523	2.35605	1.15618	4.72143	0.479373	0.187897	0.757415	0.325912	1.89653	2.5149	0.197627	0.167072
ENSG00000145248	SLC10A4	0.282165	0.242483	0.618925	2.03272	0.853251	0.328623	0.405964	1.11558	1.66583	1.83187	0.914326	0.830583	1.74243	1.99929	0.948935	2.345	1.59671	1.93264	0.616723	2.86486	0.299675	0.149829	0.155956	1.34367	0.855091	1.55749	1.07536	0.723396	0.200368	0.728728	0.456068	0.226433	0.241849	0.235782	0.407079	0.15018	0.65434	0.880918	0.200707	0.620428	0.445713	0.185584	3.54001	0.518248	0.318533	0.323471	0.815136	0.435271
ENSG00000163624	CDS1	1.45932	0.993576	3.00327	0.383102	0.397598	0.477397	1.97224	2.88427	3.6707	3.48252	4.71366	4.58197	3.75756	4.20074	2.8215	3.304	3.4313	3.13974	1.799	2.53291	2.36675	0.194567	0.078724	2.37801	2.09135	0.787523	2.84047	1.6231	4.96596	1.52744	2.6975	0.417331	0.468678	3.02748	3.53145	0.476757	3.35446	4.3947	0.111174	0.764304	3.18458	2.08366	3.43527	2.97599	4.77867	4.87487	3.28983	1.22725
ENSG00000172238	ATOH1	0.00769579	0.00447459	0.00633152	0.00927029	0.0115686	0.00885018	0.00354723	0.0225359	0.0110694	0.00411386	0.0291913	0.0273563	0.00613239	0.00685347	0.00901547	0.0277186	0.0153303	0.00531587	0.00833254	0.00887812	0.020556	0.00460646	0.0100935	0.00674418	0.0141138	0.643191	3.36516	0.00717801	0.0245814	0.0184603	0.0619927	0.0327098	0.00461983	0.00223562	0	0.00446032	0.00595238	0.00819133	0.00589804	0.0102786	0.00841639	0.00519174	0.0131231	0.0328115	0.0746391	0.0794204	3.64594	0.00742486
ENSG00000164093	PITX2	0.064054	0.224745	0.0340831	0.042536	0.228246	0.0542783	4.50897	0.0210788	0.0140898	0.0103255	0.0141938	0.0237994	0.0114363	0.0105557	0.0141303	0.724531	0.0188977	0.00681631	0.0476884	0.540231	0.513855	2.36785	0.131674	0.740225	0.291614	0.0902798	0.869941	2.34867	1.13311	3.40416	0.145389	0.242611	0.0408688	0.223767	0.341456	0.0198516	0.0254703	2.78842	4.06437	0.0374025	0.0594024	0.024261	4.03039	0.649546	1.05084	0.468801	1.50537	0.0191875
ENSG00000145428	RNF175	0.91621	1.08578	0.619561	0.817783	0.775988	0.716053	0.617091	2.29324	3.05717	2.69158	3.53678	3.34825	3.37025	3.69205	2.27977	2.99327	3.0395	2.27629	1.3691	1.86317	0.973697	0.769247	0.0312369	0.856931	1.55697	0.753298	0.559441	0.582312	0.430635	0.613504	0.785118	1.51027	0.311157	0.248935	0.218095	0.268194	1.50853	1.29904	0.118293	1.30335	0.253703	0.153819	2.68596	1.78184	0.718005	0.730864	0.71879	1.92514
ENSG00000145569	FAM105A	2.63617	2.3655	1.58105	1.87095	1.99459	1.48569	2.34804	1.32223	1.2348	1.1221	1.83232	1.62317	1.1889	1.41359	1.33307	1.6522	0.989434	0.864074	2.22321	1.57364	2.38023	0.541651	0.604588	3.12502	3.10798	1.77698	3.41507	1.55602	1.53243	1.60199	1.9644	0.828402	0.477	1.38795	2.41866	0.418012	4.6336	1.67845	0.396197	2.31534	2.212	2.44815	2.53102	3.77958	1.5857	1.68929	3.53882	3.71412
ENSG00000152503	TRIM36	0.419244	0.326262	0.825183	2.54197	2.21946	3.06299	0.355444	2.31003	3.01868	1.30494	0.401803	0.395173	2.59608	3.3339	2.69458	2.96213	1.47539	0.849267	3.59403	2.74705	0.896609	0.174961	0.21357	1.33563	1.42555	0.59319	1.92471	1.05774	0.290812	0.857988	0.756975	0.139585	0.0816125	0.246246	0.267631	0.205091	0.979632	0.450154	0.109067	1.26688	1.55385	0.472799	3.59382	2.5677	0.517792	0.55095	2.23197	0.498968
ENSG00000081059	TCF7	1.6878	1.92432	2.30953	0.930332	1.42868	0.74704	1.86356	0.914709	0.837183	1.05493	0.832841	0.957194	0.840275	0.776634	1.07886	1.11038	0.909343	0.815596	2.1582	1.07245	2.24082	1.61517	4.86405	1.70886	2.37256	1.72534	2.035	1.15325	2.00347	1.26537	2.83454	1.14975	0.649296	1.53897	1.84198	1.61118	2.74632	2.31113	0.325576	3.12211	1.69775	2.20625	2.57804	2.55248	2.19009	2.2189	3.91052	4.35074
ENSG00000113248	PCDHB15	2.19387	2.82967	1.19018	3.67342	3.28945	2.85251	2.82864	1.78228	1.69237	1.65131	3.06802	3.29977	1.73941	1.78793	1.6437	1.9441	1.60271	1.56973	2.39605	1.77309	2.48278	0.411663	0.0540974	3.36534	3.93937	2.88588	1.9944	2.91245	1.31356	3.00797	3.59457	2.15252	1.72693	1.64609	1.77437	0.632712	3.03942	1.79987	0.819083	3.03525	3.9659	1.63976	2.87879	2.42633	1.66371	1.50035	1.82784	2.38906
ENSG00000262576	PCDHGA4	1.42191	1.29881	0.977021	2.33381	1.93139	1.96208	1.31145	1.17996	1.40372	1.58746	2.08542	2.07812	1.439	1.46354	1.04873	1.20974	1.57959	1.30605	1.37114	1.0295	1.48595	2.37062	0.200336	1.74657	1.82653	1.32723	0.783279	1.43478	0.492155	1.41272	1.65411	1.15164	0.891798	0.447061	0.542405	0.2031	1.55256	1.17749	0.684539	1.93375	1.92751	0.642323	1.51985	0.966123	0.931626	0.987733	0.672095	0.379965
ENSG00000145888	GLRA1	0.0400813	0.041663	0.114057	0.0354067	0.042103	0.0380376	0.0359633	0.0966533	0.0738472	0.136971	0.517786	0.48112	0.0895308	0.113658	0.0530217	0.930366	0.120647	0.228159	0.646793	0.897848	0.0403137	0.0520564	0.0460553	0.0503494	0.00290076	0.033623	0.0319133	0.0427095	0.0277937	0.0357292	0.0735646	0.0249709	0.0148496	0.0211161	0.0290563	0.0165832	0.0476276	0.0233994	0.041126	0.0646182	0.0353943	0.145533	0.0397358	0.0317261	0.0220944	0.0242641	0.0353871	0.033833
ENSG00000113196	HAND1	0.0426128	0.401832	0.633382	0.571203	0.254703	0.361006	2.75978	0.0425729	0.0375279	0.0148271	0.0486144	0.0489345	0.0331091	0.0318092	0.027315	0.0640734	0.0331278	0.0218887	0.0238061	0.0173277	0.0715002	0.0229442	0.0902302	0.0909159	0.0388952	5.49724	3.66167	0.0538331	0.0220056	0.0581628	0.048403	1.68803	3.69721	0.0313566	0.040617	0.0150819	0.230775	0.0336422	0.0268454	0.0736856	0.059717	0.0443783	0.245064	0.0854225	0.167565	0.0438255	1.60507	0.030381
ENSG00000137285	TUBB2B	1.8215	1.63715	0.992522	1.74314	2.59695	1.42307	1.92447	5.6342	5.66513	5.66883	5.65287	5.66579	5.66762	5.66803	5.59252	5.66449	5.66842	5.66431	5.67243	5.67243	2.49394	1.52943	3.81345	3.31662	3.43682	4.21781	3.08473	3.23345	1.84795	3.45509	2.33743	1.68165	0.866798	2.79534	3.26823	0.879494	1.32542	3.20291	1.04136	5.46895	1.10519	1.78008	5.11642	2.18199	2.48131	2.25365	2.49459	0.583744
ENSG00000197977	ELOVL2	0.875629	1.0793	0.745074	0.511143	1.29981	0.837602	1.60913	3.34514	3.60925	3.70541	3.00342	3.5484	3.50041	3.54528	2.85721	2.76519	3.79814	3.359	4.5787	3.09012	1.6788	1.57644	0.102109	0.388218	0.654532	0.981181	0.539191	0.853517	0.399837	0.935365	0.674403	1.4891	1.41432	0.224561	0.23675	2.96877	0.635446	0.74549	0.501702	2.18877	0.702196	1.18344	1.94539	1.9302	0.270449	0.356232	0.5877	0.0611849
ENSG00000112812	PRSS16	0.186931	0.856826	0.939014	0.725712	0.288787	0.31246	1.38407	0.56355	0.920321	0.089409	1.34269	1.21314	1.38682	1.79935	0.447075	0.242552	0.186335	0.0931716	0.163118	0.351327	1.98319	0.182949	1.4465	1.18388	1.82342	0.417937	2.36582	0.268491	2.99126	0.160466	2.10571	0.291042	0.031206	1.64092	2.53534	0.197	2.5493	3.37735	0.0598489	0.231667	2.33978	3.9787	3.22525	2.65568	2.79823	2.5891	2.55929	0.993032
ENSG00000204314	PRRT1	2.39316	2.49436	2.68274	3.91887	3.40495	3.77026	3.42452	4.74837	5.22574	4.9032	5.66929	5.67243	5.55779	5.46404	5.0075	4.90611	5.10368	4.66232	3.69974	3.79125	2.85576	1.83027	0.433294	3.64447	4.02174	3.83044	3.13253	3.77364	2.41668	3.57432	4.16586	1.9975	1.18434	2.30737	3.09825	1.11718	2.6196	1.97737	0.806811	4.08004	5.38685	0.997915	4.87006	3.73375	2.66979	2.73979	2.8628	2.14347
ENSG00000112796	ENPP5	1.0685	1.59578	2.28465	2.49397	3.39334	3.29484	2.71147	2.46197	3.26926	2.58357	3.52073	3.50342	3.41318	3.86076	2.47863	3.09972	2.94869	2.53765	2.79489	3.44579	2.11094	1.53971	2.01164	1.37274	1.91758	0.685156	1.20291	0.801101	0.847153	0.939913	1.8036	1.87254	1.00105	2.81456	3.00827	0.30534	2.67923	3.201	2.52242	1.58609	2.89061	2.2472	4.71098	3.55073	1.2988	1.55395	1.44683	2.46063
ENSG00000112837	TBX18	3.77031	1.83872	1.0197	4.69818	5.07065	5.38776	2.61579	0.681102	0.648793	0.813538	0.331816	0.551118	0.816333	0.540292	0.676229	0.816092	0.66918	0.812766	0.907355	0.863506	3.09174	4.81253	0.0294645	1.79877	1.68676	0.690719	0.635804	1.84043	1.02064	2.26933	1.80389	2.31801	1.12706	0.279396	0.486195	0.109004	0.394703	1.01713	0.73949	4.3251	2.13813	0.137339	1.31035	0.651146	2.22154	2.59777	0.636379	0.0647189
ENSG00000112246	SIM1	1.95808	0.0123062	0.00389651	0.0112218	0.00790512	0.0422036	0.00971908	0.00755832	0.00490382	0.00269932	0.00763209	0.0069087	0.00429655	0.00299907	0.00388056	0.890015	0.00877831	0.00172523	0.00607341	0.0387614	0.949505	2.75225	0.0147389	0.0540914	0.00850944	0.00938291	0.00680241	0.00545124	0.0067004	0.0116113	0.0472638	0.00716022	0.00293004	2.28523	3.10013	0.0574429	0.00720513	0.0378308	0.422507	0.0183082	0.00610543	0.963674	0.122788	0.0292866	0.475236	0.701876	0.0876329	0.00555031
ENSG00000112333	NR2E1	0.0132072	0.0181155	0.476116	0.011435	0.0132442	0.0171539	0.0669578	3.88392	4.09761	4.27881	0.189896	0.195888	4.07548	4.01925	3.12517	2.76962	4.0176	3.75216	0.198506	2.21344	0.0433191	0.0117587	0.0187033	0.0172617	0.00617456	0.0102789	0.0117494	0.0172578	0.0464918	0.0117037	0.0158629	0.0132385	0.0090444	0.0440196	0.0172469	0.0237377	0.0332321	0.0654613	0.0122734	0.0185402	0.0328264	0.0499467	0.343542	0.0246294	0.123412	0.123877	0.00788517	0.0860811
ENSG00000146352	CLVS2	0.0292472	0.0118006	0.12824	0.0305946	0.0927451	0.218989	0.214436	1.75022	2.55425	2.01148	5.10683	5.00785	2.66633	3.13727	1.87125	2.08875	2.36028	1.58848	1.05831	1.41844	0.150461	0.119498	0.0105014	0.663093	0.593196	0.597444	0.200857	0.117462	0.0253631	0.123939	0.00555718	0.017887	0.0440419	0.00680723	0.00953054	0.00868051	0.0279508	0.164621	0.223692	0.0771124	0.0311621	0.0147555	2.19428	1.91683	0.207952	0.199868	0.0979176	0.00602853
ENSG00000177468	OLIG3	0.00299513	0.00427073	0.00285535	0.004494	0.00295902	0.00280513	0.0109296	0.0145772	0.010659	0.00208696	0.00178848	0.00296417	0.00174997	0.000875582	0.00530707	0.00676419	0.00156834	0.00137356	0.0394346	0.00206361	0.00493595	0.0026819	0.0227098	0	0.0318738	0.00309027	0.00321934	0.0627854	0.0499219	0.0338172	0.00397072	0.00203538	0.00159456	0.0448405	0.0191049	0.00205844	0.00809661	0.00449651	0.00185213	0.00245552	0.00745464	0.0601613	0.00302115	0.0147258	0.0656484	0.0351272	0.0118313	0.00340941
ENSG00000112038	OPRM1	0.00225406	0.00183343	0.0486307	0.00223361	0.00157686	0.00148895	0.00411068	0.0586694	0.0851338	0.0627527	0.915004	1.31658	0.0986366	0.116601	0.0168975	0.246375	0.24412	0.0373906	0.042871	0.0135839	0.00273683	0.00193912	0.00247421	0.00210527	0.00919821	0.0238909	0.0107358	0.0112489	0.00117934	0.0141455	0.0114006	0.00087256	0.00116011	0.000407218	0	0.00159564	0.00298673	0.0013282	0.00142642	0.00216732	0.00417096	0.00672251	0.0518011	0.00491265	0.00175413	0.00218552	0.00670066	0.00188667
ENSG00000011275	RNF216	4.49924	4.20765	3.91257	5.11367	4.79658	5.13823	4.7031	3.14471	3.35031	3.5478	4.37973	4.51246	3.78488	3.65016	3.1967	3.68213	3.61353	3.35579	3.56911	3.27132	4.39473	4.70065	4.74472	4.48105	4.75538	5.18531	4.24806	5.11514	3.77753	5.26981	4.86447	3.98989	3.07919	3.23184	3.5376	2.7553	4.52967	3.93877	3.69632	4.61036	4.90364	3.10223	4.68891	4.61691	4.07982	4.2874	4.60888	4.86979
ENSG00000106038	EVX1	0.161165	0.0909564	1.20363	0.0388426	0.0378466	0.0575542	1.80304	0.0108346	0.00868408	0.00918885	0.0107255	0.00720383	0.0117229	0.0072129	0.00955107	0.0183571	0.010788	0.0058061	0.173692	0.0297871	0.135178	0.00790582	0.00288585	2.1555	1.81839	0.0696009	0.280992	0.00822706	0.00491106	0.00875967	0.109212	0.0859702	0.00753228	0.163939	0.0899392	0.00460246	0.00590925	0.0134682	0.0121249	0.0685078	0.0548928	0.00740723	0.113688	2.65243	0.0352958	0.0427075	0.00909507	0.0060439
ENSG00000164532	TBX20	0.0224585	0.0312404	0.289936	0.811947	2.32923	0.0230239	2.67897	0.0186821	0.0140241	0.00676576	0.0119091	0.0116012	0.00562912	0.00430086	0.00662369	0.00612481	0.00728549	0.00510983	0.0132309	0.00663364	0.027298	0.0406791	0.0510509	0.0216768	0.0257583	0.01239	0.02416	0.377923	0.019036	0.0537473	0	4.32157	2.52522	0.00810239	0.00984427	0.138826	0.0557925	0.0199462	0.01199	0.054863	0.0158194	0.00917998	0.95318	0.0305559	0.0187739	0.0173087	0.0278345	0.0129469
ENSG00000146678	IGFBP1	0.105287	1.56559	0.153815	0.200417	0.284171	0.178356	0.0370758	0.413593	0.387325	0.226952	0.170613	0.215884	0.356658	0.448097	0.373401	0.569991	0.195974	0.16362	0.451246	0.547632	0.477477	0.10063	0.0475492	0.0751183	0.410591	0.0676377	0.0958277	0.0937464	0.0909682	0.075469	1.34061	0.302998	0.0779912	1.00679	0.298701	5.44498	0.239926	0.0727518	0.0862984	0.0570489	3.54011	0.130445	0.459892	0.0754552	0.0785372	0.0543031	0.129174	0.212809
ENSG00000153956	CACNA2D1	3.75973	3.12434	3.48423	3.86444	3.73579	4.20419	3.57727	2.84348	3.46683	3.02937	3.97736	3.66495	3.41439	4.079	3.32551	3.89404	3.28724	2.67881	2.80472	2.4045	2.88863	4.19264	0.0658313	3.06908	3.31956	4.43502	2.83502	3.58612	1.50487	3.74287	3.22646	3.19582	2.86703	1.78218	1.71885	0.530142	2.72391	2.11066	5.12283	3.29288	3.44557	0.588599	3.68368	3.16596	2.35243	2.19425	2.22015	2.14194
ENSG00000170615	SLC26A5	0.674051	0.388824	0.329834	0.424562	0.46155	0.354492	1.29438	0.126399	0.103876	0.15142	1.90874	2.04164	0.163842	0.100707	0.121488	0.208544	0.18751	0.126416	0.308979	0.241695	1.21319	0.134587	0.221666	0.694138	0.620918	0.323971	0.249437	0.286354	0.1681	0.254494	0.532764	0.198066	0.0454879	0.330702	0.226835	0.265058	0.835547	1.02546	0.10317	0.972871	0.454044	0.173219	0.607421	1.06692	1.05385	1.08574	0.362906	0.527903
ENSG00000128610	FEZF1	0.030047	0.0280303	0.0126014	0.119187	0.0511227	0.0374424	0.0636986	1.38712	0.142064	1.63304	0.152748	0.1653	0.121061	0.137181	0.148224	2.64036	1.23355	1.266	0.113278	1.12106	0.0392606	0.00559153	0.0103333	0.0157956	0.0764369	0.041753	0.0207358	0.0682897	0.0340857	0.0821611	0.0607219	0.0302724	0.0563632	0.0175149	0.0458639	0.00686863	0.0749756	0.0367449	0.0488443	0.223898	0.106732	0.0104738	0.991749	0.0873057	0.0128109	0.0154934	0.0239216	0.00666027
ENSG00000174469	CNTNAP2	0.0307206	0.258875	0.146942	0.0262853	0.113303	0.057993	0.14569	3.13335	3.50093	2.643	2.81732	2.52844	3.96046	4.43377	2.75602	3.37044	2.86037	2.62001	4.43128	3.14402	0.0635534	0.026733	0.0256097	0.182444	0.0885272	0.43244	0.646544	1.00698	0.373668	0.880356	0.262125	0.155757	0.0444378	0.0755063	0.0888582	0.64786	0.112617	0.146631	0.0121858	0.049752	1.01068	0.0843476	2.06831	1.86193	0.10259	0.0618553	0.820876	0.295187
ENSG00000104369	JPH1	0.342114	0.675064	0.31772	1.45077	2.13191	0.57426	2.32792	1.85454	2.67303	3.15047	5.07406	4.94713	2.93716	3.13671	2.27619	1.42954	3.05214	2.7887	3.0111	1.40029	0.957135	0.207516	0.255501	1.26894	1.37782	1.19864	2.06904	1.16691	1.71998	0.508389	0.690564	2.65047	2.6077	0.975989	0.674542	0.407257	2.49586	2.26162	5.66647	0.69609	0.488125	2.38884	1.04289	2.64218	1.00276	1.04703	1.43909	0.233725
ENSG00000104381	GDAP1	2.68005	2.29413	2.68384	2.19951	2.37575	2.19965	2.7645	4.51552	4.97634	4.44844	5.56856	5.54331	4.96603	5.32173	4.49017	4.98898	4.76895	4.21897	4.93271	4.51596	3.00053	2.69587	2.89875	2.93793	3.00469	2.49185	2.14531	2.43514	2.47621	2.34438	2.71541	1.60321	0.872282	1.89249	2.5039	1.05982	2.27922	2.31976	1.52019	3.90799	3.70661	2.60598	5.28504	2.999	1.84788	2.08174	2.35082	2.15331
ENSG00000123119	NECAB1	2.20846	2.10854	0.960177	3.10445	3.12814	3.55121	2.88939	4.54163	4.82104	4.2848	1.2963	1.28137	5.07322	5.37384	4.51186	3.99347	4.5066	4.12919	5.08016	3.67315	1.94358	1.45673	1.32232	2.79693	2.92508	3.69449	2.23185	3.64182	1.10328	3.55482	2.90501	2.66906	2.06671	1.64451	1.54572	0.196995	2.32171	0.993827	0.35397	2.42264	2.87487	0.240203	2.59296	2.56631	1.77963	1.90636	1.49261	1.47481
ENSG00000104549	SQLE	3.36017	3.43706	4.23797	3.70582	3.50957	3.77249	3.35496	3.52599	3.81692	3.25211	4.3216	4.20401	3.86852	4.12719	3.97657	4.31787	3.32771	2.99668	5.35793	3.55199	3.29173	5.31713	5.67117	4.16985	4.30157	2.74971	3.63658	2.93977	5.57271	2.93189	3.90399	2.51009	1.5494	3.29417	3.94667	3.77841	4.73874	4.20662	0.795302	4.49755	4.0945	2.51932	4.57339	3.74518	5.54423	5.53869	3.86879	3.70979
ENSG00000167632	TRAPPC9	3.50422	3.24382	3.6733	3.97139	3.71459	4.07787	3.86148	2.90771	3.34498	3.21365	4.15058	4.37723	3.95217	3.76697	2.93267	3.24224	3.29074	3.03148	3.55694	3.14616	3.54711	2.88143	3.36268	3.89886	4.04444	3.78356	3.51367	3.95056	3.56518	3.94218	4.16149	3.22586	2.70214	3.27369	3.2076	2.48432	3.74971	3.63292	4.02273	4.06179	3.92768	2.58232	4.7119	3.89727	3.65775	3.76084	3.63262	3.67931
ENSG00000173253	DMRT2	2.36846	0.996616	0.0494139	0.172883	0.178696	0.156777	0.121831	0.907185	0.455242	0.712408	0.32291	0.415677	0.666586	0.58567	1.31191	0.725495	0.506216	0.924504	1.59564	1.14128	2.39831	0.51804	0.0261937	0.122139	0.11153	0.181446	0.839939	0.352234	0.350376	0.306568	0.729912	0.0445654	0.100554	4.32174	3.46107	0.0135938	1.58777	1.08377	1.01085	1.35046	0.0900103	0.0392714	0.70662	0.345035	0.50872	0.518033	0.206715	0.0249109
ENSG00000156345	CDK20	2.62082	2.86968	4.68716	2.82807	3.04881	2.97331	4.22178	3.01551	3.70594	3.4012	4.14878	4.26297	4.44225	4.35972	3.15593	3.80725	3.94218	2.99641	2.605	2.78313	3.18126	2.85524	0.162878	4.07509	4.8094	4.00689	3.58023	3.62192	2.52473	3.54482	4.49757	2.2406	1.3166	3.37656	3.97308	2.03136	3.23668	3.11636	0.994903	3.91231	4.73213	2.78159	5.33375	4.04596	3.12878	3.08957	3.39023	2.39239
ENSG00000130713	EXOSC2	3.80033	3.80843	3.40362	3.71221	3.81597	3.7809	4.08354	2.53609	2.85503	2.77795	4.56562	4.49023	3.19803	3.26589	2.5989	2.7959	2.90848	2.53681	2.878	2.50724	4.00267	4.73935	4.97587	4.33946	4.47572	3.75901	3.59199	3.80264	3.78872	3.72264	4.44943	2.73292	2.28764	2.77174	3.53602	2.96399	3.7662	3.5857	2.94943	4.44421	4.61634	2.74171	3.61714	4.19557	4.04278	3.98481	3.87394	4.17199
ENSG00000095777	MYO3A	0.312245	0.300022	0.0270928	0.348869	0.214142	1.61702	0.096628	0.125299	0.0838915	0.78121	0.028893	0.04278	0.0962398	0.0621134	0.162746	0.466145	1.09806	0.65185	0.0904831	0.0751697	0.232523	0.00394238	0.0407211	0.207559	0.115656	0.131262	0.223758	0.1414	0.464557	0.08637	0.438678	0.0274976	0.0137276	0.418818	0.421108	0.0477268	0.22585	0.167215	0.0557574	0.367167	0.14172	0.507051	0.749109	0.23002	0.535991	0.353607	0.314061	0.108529
ENSG00000136750	GAD2	0.0346629	0.0190649	0.016152	0.0193538	0.0164932	0.0691046	0.00961242	3.03658	4.08087	4.67739	3.67703	3.77357	3.67607	4.2361	2.43565	4.34315	4.92635	4.36421	1.37595	2.33327	0.0245103	0.0201036	0.0243312	0.0255215	0.010663	0.0196381	0.0193645	0.0303621	0.0131502	0.0178299	0.0204196	0.0159664	0.0140435	0.0159913	0.0122379	0.0104929	0.0320791	0.0148152	0.0222361	0.037769	0.0322389	1.30129	0.686837	0.0344055	0.0259654	0.0368959	0.0250493	0.0115166
ENSG00000188716	DUPD1	0.0479524	0.0668169	0.028739	0.0245647	0.0450313	0.071911	0.110817	0.0651738	0.0407759	0.0436921	0.0245966	0.0278786	0.0656474	0.0718163	0.0485233	0.0468578	0.0427988	0.0473699	0.0267816	0.0276834	0.0605573	0.0412586	0.259578	0.0470505	0.0878999	0.0411494	0.0383215	0.0714951	0.0411093	0.115309	0.0470796	0.0526414	0.407868	0.00757923	0	0.0167089	0.0493707	0.425602	5.20945	0.0922221	0.0396067	0.015184	0.475301	0.165873	0.0846041	0.0863151	0.0599567	0.0382029
ENSG00000177853	ZNF518A	3.22504	3.12721	2.93609	3.42967	3.4498	3.09871	3.49827	2.01209	2.01489	2.19726	3.36925	3.73702	2.54474	2.1953	2.03206	2.43394	2.29971	1.93134	2.89283	2.18457	3.4273	3.33355	3.86189	4.06709	4.22367	3.29464	3.38977	3.2613	3.00946	3.12387	4.06184	2.19968	1.69142	2.67872	3.14492	2.30592	3.2536	3.29981	1.67632	4.39528	4.43286	2.71259	4.03392	3.76417	3.08099	2.9323	3.56959	3.66682
ENSG00000197702	PARVA	5.67019	5.65819	4.44639	5.6718	5.65481	5.67241	5.66706	3.60475	3.92552	3.78289	3.15985	3.27576	3.92201	4.04878	3.35882	3.4921	3.43051	3.46492	3.4136	3.20264	5.6538	5.67243	0.177409	5.43994	5.67243	5.64137	5.24419	5.64387	4.76309	5.65294	5.65367	4.87159	4.16121	4.48073	4.65768	3.28405	5.58694	4.92682	2.76526	5.67072	5.61665	4.36758	4.36769	5.52263	4.33644	4.60209	4.80382	4.04408
ENSG00000007372	PAX6	0.0229098	0.0378698	0.13115	0.109381	0.0407822	0.0565314	0.00633556	1.86351	2.06119	2.07897	5.15413	5.12636	2.15018	1.98714	1.50652	1.10734	1.72696	1.85062	1.26096	0.987593	0.0198909	0.0662871	0.0852055	0.0115618	0.0108782	0.0258753	0.0883001	0.0421679	0.024378	0.0296996	0.0252524	0.0107102	0.00775964	0.00946896	0.210721	0.00753827	0.0175485	0.0468374	0.0244407	0.0299302	0.0346794	0.95928	1.57296	0.0271705	0.0658834	0.135928	0.203176	0.0132797
ENSG00000110446	SLC15A3	5.00556	4.98431	3.70894	4.59214	4.97325	3.92327	4.37457	3.07879	2.147	2.97992	1.89239	2.11453	2.43752	2.2644	2.77259	2.94331	2.66939	2.5829	3.98949	3.25151	4.5416	3.42824	5.61676	4.91157	5.09243	5.26991	4.57557	4.9744	3.48404	4.99474	4.96519	3.71804	3.31337	3.34247	3.98782	2.92699	5.65386	3.52827	2.0999	5.65971	5.39886	1.93498	3.40083	4.54321	3.12293	3.417	4.98806	5.66205
ENSG00000134824	FADS2	3.71729	3.73201	5.67235	5.49797	5.07345	5.00168	3.83847	5.36843	5.44737	5.54047	4.60733	4.99821	5.50606	5.36887	5.16525	5.48538	5.48439	5.38722	5.17575	5.43835	3.21627	4.72012	5.62614	5.15278	5.4954	4.17127	3.09156	4.30091	2.68675	4.18677	4.9718	3.44214	2.41033	2.79411	3.5409	4.49729	4.43843	3.67777	1.6912	5.22794	4.20133	1.88111	5.36594	5.2777	3.73763	3.38009	3.39155	2.94496
ENSG00000149380	P4HA3	1.38521	1.37273	0.879533	2.52247	3.18342	2.38311	2.72772	0.15725	0.206548	0.296172	1.539	1.58215	0.217802	0.208367	0.180781	0.334457	0.285209	0.307121	0.237685	0.210263	1.23865	3.48282	0.257525	1.45259	1.66372	1.53985	0.940923	1.14261	0.527911	1.23599	1.66525	0.442755	0.264095	0.611019	1.05521	0.507694	1.53992	0.838349	0.233986	0.861235	1.39642	0.302305	2.62969	2.79294	0.815532	0.940907	0.718358	0.308841
ENSG00000188909	BSX	0.00637435	0.00775485	0.0171863	0.0100429	0.009166	0.00745313	0.0179956	0.0317905	0.0188548	0.00726682	0.0188393	0.0209776	0.0094164	0.0103141	0.0134221	0.821287	0.023492	0.00366176	0.0108898	0.0572099	0.00978002	0.0106872	0.00763363	0.0209092	0.0102658	0.0105234	0.00690597	0.0073859	0.00531084	0.0106454	0.00962755	0.00377375	0.00251131	0.00654785	0	0.00304365	0.00927701	0.00385549	0.00441073	0.0199848	0.0126119	0.00466536	0.0388911	0.0090444	0.00426258	0.00419544	0.00578087	0.0125678
ENSG00000123388	HOXC11	1.68174	0.0521919	0.0172056	0.0423447	0.0427106	2.70739	0.703971	0.0116292	0.00819606	0.0115995	0.0184953	0.020025	0.0125465	0.0119301	0.0135409	0.0139831	0.0114415	0.00975135	0.0226003	0.00798626	0.266497	3.16688	0.0451553	0.276289	0.629469	0.0625671	0.158704	0.0268262	0.0330372	0.0264712	0.523195	0.0108941	0.00926455	0.812545	1.2014	0.00964412	0.0294022	0.0174419	0.680477	0.579225	0.173721	0.0151738	0.0185717	0.386154	2.20357	2.96203	0.428272	0.0217772
ENSG00000198353	HOXC4	3.80665	2.38684	2.29014	1.48443	1.22816	4.53585	1.17386	0.142858	0.0905486	0.116818	0.166583	0.167303	0.0885909	0.094921	0.217592	0.177414	0.105119	0.0920271	2.40672	0.437923	3.14216	3.8471	2.64354	0.889576	1.50521	1.87387	1.44729	3.20111	3.48544	3.1261	5.27543	0.481	0.140186	3.63219	3.83723	0.130844	1.09762	0.331249	2.04859	4.71087	4.26043	0.244926	0.269305	1.03142	3.20431	3.35752	3.27512	1.84744
ENSG00000180318	ALX1	0.3685	0.0476395	0.0362995	0.0916442	0.354296	1.00938	0.757849	0.0769739	0.0442784	0.0759783	0.0115706	0.00672552	0.0834943	0.076378	0.108383	0.110583	0.0835033	0.0396245	0.0253154	0.0204841	0.425204	0.986297	0.0162868	1.09394	1.55773	0.0546941	0.0414695	0.143289	0.0413262	0.0816184	2.54289	0.0397073	0.0184396	1.27481	2.60934	0.00377869	0.105149	1.82037	0.0385331	0.228432	0.808454	0.0107103	1.16468	0.177072	0.958704	0.949944	0.0455226	0.00857832
ENSG00000172915	NBEA	1.99217	1.84301	2.52052	2.3887	2.44809	3.09568	3.10598	2.19961	2.83178	2.49599	4.87873	4.74623	3.24534	3.42425	2.37714	2.61893	2.76274	2.10707	1.94843	1.78766	2.40964	1.31328	0.570996	3.13284	3.23293	3.65784	2.36724	3.26113	1.14414	3.05168	2.93121	2.23383	1.80744	1.64385	1.59015	0.321332	1.71788	2.72629	1.40219	2.85324	3.26188	1.32306	3.9444	2.95911	1.53493	1.58966	2.07055	2.0039
ENSG00000125285	SOX21	0.0835452	0.0636764	0.0178436	0.0383601	0.0407156	0.039196	0.0240116	3.5749	3.43631	3.63114	1.8159	2.09951	3.40029	3.33105	3.06119	3.06444	3.28145	3.30758	2.35433	2.96682	0.0736224	0.0238948	0.0186028	0.756456	0.0977214	0.0311791	0.0329616	0.0645778	3.91532	0.0542405	0.0877068	0.0207014	0.0156947	0.0172926	0.0130292	0.0221176	0.224584	1.05269	0.0253402	0.0675371	0.0443661	0.0283414	0.487969	0.776821	4.52694	4.7082	0.0343283	0.0157239
ENSG00000139800	ZIC5	0.0432199	0.0252034	0.0314586	0.0163351	0.0142881	0.0167593	0.0292948	1.36712	1.73612	0.708718	5.48881	5.57301	1.84858	1.55744	1.43257	0.963731	0.753047	0.809034	1.24786	0.740801	0.0482469	0.00695008	0.00934203	0.0119787	0.00743457	0.0123557	0.0122796	0.0144233	0.0152271	0.0152788	0.0186902	0.00754615	0.00522477	0.0100975	0.113611	0.0108936	0.0300282	0.0185405	0.00819004	0.0233529	0.0454355	0.00811268	0.396114	0.0210348	0.0253682	0.0273459	0.0172757	0.00872576
ENSG00000043355	ZIC2	0.155321	0.111791	0.0859973	0.0704429	0.0523314	0.0887784	0.0469103	2.50002	3.22456	1.52079	5.66443	5.67243	3.41802	3.08541	2.89438	2.35912	1.72279	1.95692	2.56483	1.92317	0.19791	0.0817956	0.0356995	0.0333479	0.0215512	0.0617406	0.0752092	0.0690704	0.219245	0.066261	0.0942343	0.0288435	0.0220937	0.0350542	0.257065	0.0521454	0.100752	0.0728452	0.0304085	0.0732304	0.119919	0.0374322	0.865892	0.0808099	0.349776	0.265125	0.0824304	0.0338558
ENSG00000176165	FOXG1	0.0348005	0.0257359	0.0823967	0.122844	0.0657552	0.0754686	0.092528	3.81185	4.44932	4.23349	0.0638274	0.0216191	4.61037	4.77415	3.78984	1.23256	4.26455	3.81372	0.0901322	0.202478	0.0595189	0.200303	0.148251	0.0836929	0.129516	0.02106	0.0206898	0.79222	0.212007	1.51787	0.0995894	0.0382345	0.0111329	0.0376768	0.0444307	0.00956864	0.0695528	0.025792	0.0165683	0.0737219	0.909874	0.010379	2.47317	0.035403	0.0809653	0.0483892	0.089597	0.104402
ENSG00000186960	C14orf23	0.00598202	0.00460139	0.00334161	0.0121201	0.00461989	0.00811156	0.007753	1.52784	2.12565	3.16165	0.0249592	0.00498388	2.07584	2.25866	1.73402	0.468879	3.00147	2.85029	0.0314187	0.121314	0.00982199	0.0156677	0.0500437	0.00951516	0.0036229	0.00440095	0.00371734	0.15363	0.0117476	0.337881	0	0.00485212	0.00340992	0.00493433	0.0152256	0.00236571	0.00662701	0.0031088	0.00472214	0.00875662	0.0182462	0.0016917	0.436353	0.00562423	0.00820375	0.00596929	0.00801578	0.00687902
ENSG00000126778	SIX1	3.23568	1.09039	0.38844	1.40077	1.4714	2.66355	0.888615	0.204966	0.206037	0.293523	0.137942	0.20472	0.340612	0.229542	0.194912	0.208185	0.176192	0.314307	0.235345	0.255268	1.63892	3.94873	0.201014	0.207854	1.43266	0.0771543	0.0868078	0.641142	0.104027	0.526408	0.56294	0.0844382	0.0379247	0.124884	0.105816	0.0277042	1.04853	3.35534	4.86372	1.97886	0.275605	0.0530229	4.82885	3.67543	0.20362	0.545672	0.0733693	0.0266258
ENSG00000100644	HIF1A	5.61718	5.59033	5.6509	5.64363	5.65273	5.66704	5.49371	4.46598	4.52287	4.73988	5.52774	5.43297	4.42972	4.76185	4.20441	4.81933	4.4739	4.41694	5.00433	4.76385	5.52054	5.67243	5.66614	5.54691	5.6084	5.17871	5.25241	5.4146	5.62736	5.46536	5.63144	4.81328	3.9074	5.24054	5.67243	4.01706	5.6688	5.57802	3.27927	5.50561	5.61397	3.90361	5.55623	5.34351	5.42432	5.50379	5.43447	5.6166
ENSG00000258986	TMEM179	0.170162	0.159184	2.13081	0.086561	0.213926	0.0900835	0.0805513	3.45471	4.216	4.14245	4.48997	4.63739	4.63705	4.69877	3.58716	4.57325	4.30249	3.92022	3.246	3.54914	0.12461	0.0541514	0.0264002	0.0578144	0.0849656	1.64419	1.08658	0.6556	0.0393591	0.762978	0.290514	0.369625	0.161099	0.24999	0.0797064	0.155774	0.0891116	0.118547	0.0468983	1.0025	0.159364	0.894789	5.36132	0.490115	0.0512522	0.0613291	0.742956	0.0434637
ENSG00000185024	BRF1	3.83654	3.5516	3.4158	3.61379	3.60064	3.60571	3.99077	3.25274	3.61012	3.34583	4.93884	5.00891	4.07688	3.93826	3.44985	3.8852	3.46187	3.2181	4.2248	3.53082	3.89891	3.51742	3.48585	4.27918	4.48644	3.78519	3.48499	3.83679	3.41238	3.76085	4.35979	2.6857	2.31088	3.11603	3.35857	2.82916	3.87318	3.44409	3.02397	4.35041	4.33739	2.92385	4.78333	4.25647	3.89643	3.96146	3.65674	4.11622
ENSG00000159248	GJD2	0.0109181	0.00817608	0.438854	0.0445303	0.0215176	0.0498319	0.0163068	0.781569	1.46907	1.1352	1.03018	1.02842	1.24197	1.77932	0.636182	1.05445	1.004	0.718092	0.301678	0.515935	0.00902163	0.0198478	0.00804251	0.164186	0.0555684	0.055771	0.0326879	0.109501	0.015518	0.0708787	0.0165663	1.81343	0.0610842	0.15344	0.040796	0.00467192	0.0138772	0.0102895	0.0374123	0.0107694	0.0176668	1.33827	3.49841	0.0231347	0.0196815	0.0204146	0.0721486	0.0250712
ENSG00000104177	MYEF2	1.98091	1.62466	3.02669	4.65448	3.69449	4.02445	1.97767	2.86632	3.04538	2.95372	4.91875	4.8079	3.18032	3.44456	2.87426	3.28807	3.06825	2.67888	3.34793	2.92336	2.18011	0.749142	3.57568	1.35712	2.07499	3.51669	2.59397	3.86769	0.820357	3.60842	2.95462	1.42221	0.973998	2.45795	3.0631	0.143996	2.44807	1.86105	0.48867	3.75577	1.33385	2.17465	4.82919	2.58885	1.23534	1.41566	2.34666	2.51544
ENSG00000169594	BNC1	0.300274	3.68871	0.138163	0.283378	0.262682	0.0697605	0.185183	0.0322328	0.0346539	0.0375144	0.0341229	0.0480056	0.0452935	0.0351823	0.121383	0.0424319	0.0245777	0.0471419	0.0594501	0.0715855	0.703663	4.41855	0.0248123	1.36487	0.412929	0.334066	0.190384	0.242334	4.18513	0.311194	0.876327	0.921236	0.182993	0.180406	0.078228	0.0750326	0.452428	1.26506	0.0829968	0.186484	0.913535	0.0336976	0.157983	0.521313	3.9278	3.78059	0.176624	0.158092
ENSG00000005513	SOX8	1.54389	1.67681	0.930955	3.6308	2.67594	1.92784	2.09343	5.51578	5.17198	5.55345	4.22252	4.54499	5.30084	5.17315	5.53564	5.43453	5.56133	5.5233	5.61803	5.60504	2.1639	0.543094	0.232451	2.17788	2.67381	2.93912	2.15508	2.6772	1.00751	2.55109	1.78791	2.45346	1.3302	0.857686	1.30222	0.266066	1.19934	2.57001	0.917169	5.66859	0.85992	1.24281	2.17953	2.17702	3.04667	3.57609	2.31857	1.85333
ENSG00000127561	SYNGR3	0.318806	0.360063	0.913982	0.406848	0.436636	0.228998	0.597123	4.75741	5.34634	4.60236	5.63788	5.6573	5.54485	5.46474	4.19269	5.36297	4.78072	4.27477	3.12548	4.49328	0.473966	1.09202	3.0564	0.681097	0.543118	2.56747	1.98247	1.31761	0.523994	1.48504	0.596682	0.552615	0.260665	1.50526	1.75246	0.157338	0.984208	0.927432	0.101129	0.406232	0.81256	0.389606	3.70725	0.772394	0.666035	0.649864	2.52252	1.76305
ENSG00000205362	MT1A	4.91366	5.51656	4.16667	4.70219	5.06949	4.79399	3.95046	2.88324	2.60828	2.85471	1.66961	1.78405	2.56989	2.60545	2.50968	2.91356	2.66066	2.71837	2.95794	2.93839	4.99571	4.83036	0.255842	3.53116	4.177	3.60283	3.25621	3.86729	2.92095	3.7657	4.99295	3.77306	2.55788	3.27044	3.22874	5.10578	4.9409	3.32834	3.17567	4.85749	3.57009	3.18271	3.57238	3.58922	3.08239	3.1087	3.20674	1.83918
ENSG00000177374	HIC1	4.07833	4.34979	2.82279	2.5724	3.31933	2.62098	4.05736	1.14215	1.22994	1.49516	1.90552	2.33767	1.6838	1.3919	1.33079	1.57068	1.27063	1.53122	1.4616	1.56651	3.98433	3.55285	4.39594	4.16675	4.76919	3.84103	3.19127	3.95408	2.32045	4.0035	4.61049	3.25915	2.69982	2.72861	3.1392	1.60543	3.86763	2.37479	1.99882	3.99162	4.92975	1.30641	4.13783	4.16704	2.32091	2.56491	3.48305	3.08837
ENSG00000184185	KCNJ12	1.25085	1.63023	0.658209	0.934058	1.19729	0.763153	1.16034	1.13224	2.01845	1.54165	5.5616	5.61034	2.57947	2.5157	0.899749	1.4128	1.46464	1.42205	1.10412	1.26358	1.25441	0.409435	0.702388	1.5766	1.84381	1.35562	1.18384	1.23108	0.401827	1.01742	1.90497	2.54871	2.17685	1.16738	1.39936	0.152693	2.16138	0.828734	4.56648	1.0533	0.85188	0.201901	1.24369	0.855443	1.99116	2.69051	0.743233	1.49513
ENSG00000108406	DHX40	5.04251	4.5364	4.58429	4.97133	4.94559	5.30521	4.87745	3.45048	3.51344	3.73392	4.83879	4.58827	3.57311	3.84115	3.54826	4.05439	3.57943	3.46607	4.22954	3.75389	4.87039	5.34402	4.51334	4.96699	5.19524	4.69685	4.16644	4.62193	4.15704	4.64923	4.96369	3.39581	2.73988	4.00282	4.34062	2.72238	4.54563	4.56332	3.66441	4.97258	5.36944	3.50781	5.38621	4.65844	4.75774	4.9402	4.12677	4.01197
ENSG00000134762	DSC3	0.359881	2.68756	0.294794	2.1889	1.99602	0.998228	1.6122	0.0937144	0.0603473	0.0674391	0.0794765	0.138592	0.173155	0.0772537	0.0759188	0.0778147	0.0653862	0.0512767	0.14487	0.061344	1.94003	0.256568	0.717907	1.70976	0.711271	0.343708	0.268386	0.312919	5.65514	0.317923	0.97556	0.43533	0.138178	0.102326	0.018132	0.0918064	0.439649	4.00517	0.133402	1.44959	0.759626	0.131918	0.326448	2.71784	5.67243	5.66521	0.600078	0.125924
ENSG00000119547	ONECUT2	0.0288255	0.0362621	0.280856	0.0620739	0.0347403	0.0541364	0.0529182	0.0925663	0.152166	2.16511	1.2844	1.32138	0.702046	0.719519	0.213797	0.498076	1.81825	2.01112	0.108021	0.126042	0.0412957	0.0646201	0.0704396	0.0437966	0.0728045	0.0324114	0.0789319	0.0689728	0.0352676	0.0545953	0.0265055	0.0310893	0.0182229	0.0762689	0.23618	2.42882	0.0306437	0.0475045	0.0311488	0.0227965	0.164939	1.4044	1.44277	0.111482	0.0231379	0.0238257	0.0684391	0.0360523
ENSG00000256463	SALL3	0.0115685	0.0117895	0.00554017	0.107169	0.106579	0.0156673	0.435086	2.08827	2.03589	2.26101	0.263406	0.25573	2.05056	1.89331	1.64126	1.96633	2.14535	1.8834	2.45729	1.75885	0.0187214	0.00565759	0.0660627	0.667301	0.0397151	0.00650337	0.00896266	0.0113236	0.00905783	0.0103694	0.00485785	0.585325	0.0984814	1.27067	0.323429	0.00406391	0.0137551	0.650552	0.0112958	0.0442805	0.0492931	0.00468871	0.717148	2.32241	0.0296409	0.0649423	0.00605861	0.0124205
ENSG00000064961	HMG20B	5.66889	5.61245	5.58164	5.67243	5.66769	5.67216	5.67243	4.19136	4.01702	4.02609	3.00714	3.34625	4.11845	3.98621	4.17039	4.09543	3.90011	3.98527	5.09187	4.43143	5.66054	5.67197	5.6679	5.67243	5.67243	5.67091	5.6687	5.6686	5.63324	5.6724	5.67243	4.64271	4.16975	5.4413	5.67243	5.13998	5.66887	5.65862	4.07947	5.67243	5.66951	4.6261	5.14127	5.6722	5.67233	5.67138	5.66756	5.66753
ENSG00000105131	EPHX3	0.587413	0.82072	0.463934	1.0099	0.917762	1.03277	1.63484	0.276087	0.26566	0.467728	0.17558	0.231294	0.317296	0.27596	0.280524	0.622932	0.433732	0.325856	0.379573	0.331632	0.717046	0.146851	0.137171	2.4985	1.62028	0.535107	0.471499	0.546967	5.63078	0.53351	1.34385	0.453994	0.331234	1.41306	2.30538	0.240993	2.05062	2.17298	0.155647	0.829197	1.17138	0.198624	2.06329	1.67182	5.64454	5.60028	0.593145	2.20931
ENSG00000167641	PPP1R14A	5.51571	5.54393	5.64363	5.67243	5.659	5.67243	5.59045	5.29851	4.18819	5.13922	3.9817	4.07427	4.50417	4.54663	5.46552	5.11611	4.60546	5.44317	5.67158	5.63105	5.54489	1.80131	0.525469	5.12824	5.64839	5.62997	5.08139	5.6716	4.45589	5.67103	5.50725	4.13207	4.2596	4.2356	4.21216	2.41798	5.64859	3.55498	3.12743	5.47631	5.65235	3.17927	3.25695	5.45335	3.50522	4.0227	4.66413	5.4955
ENSG00000104951	IL4I1	1.41803	1.33664	0.603818	1.08133	1.20194	0.684754	0.848633	0.586505	0.509063	0.446527	0.495426	0.474389	0.494153	0.571322	0.595049	0.582208	0.496511	0.396277	1.20129	0.676424	1.07607	0.682798	5.66314	0.771936	1.0252	0.801065	0.915168	0.511417	0.625189	0.505066	1.39535	0.402612	0.257109	1.74589	2.21038	0.407698	1.90103	0.893662	0.230308	0.999872	0.559826	0.405925	0.829567	0.954527	0.708701	0.711563	1.75751	1.88887
ENSG00000133265	HSPBP1	4.80725	4.87843	4.86189	5.26347	5.14953	5.19847	5.41808	5.18187	5.45112	5.48212	5.40181	5.40165	5.55457	5.53606	5.22742	5.2792	5.51401	5.39322	4.78045	4.83171	5.06059	5.52318	5.07039	5.4233	5.61155	5.43827	5.13762	5.36216	5.4046	5.41863	5.54475	4.67961	4.3027	4.72402	5.30834	4.32339	5.07588	4.85913	4.65435	5.55117	5.58766	3.85218	5.2708	5.40057	5.30181	5.34619	4.84961	4.74408
ENSG00000173404	INSM1	0.172458	0.0388492	0.831219	0.0376876	0.0600526	0.034663	0.0413391	1.4349	1.51814	2.55466	4.87851	4.79434	1.6471	1.72303	1.42386	2.61078	2.56577	2.31525	0.649494	1.42762	0.0967907	0.0102016	0.0557671	0.00890489	0.0130693	0.379224	0.715377	0.0508583	0.0460351	0.0342302	0.00190581	0.0101291	0.0107055	0.0283757	0.175314	0.0158727	0.068784	0.0653403	0.023145	0.0391109	0.0386194	1.27586	5.3031	0.235597	0.155551	0.293777	1.1399	0.153774
ENSG00000125816	NKX2-4	0.00362037	0.00304079	0.0335062	0.00505715	0.00332059	0.00368795	0.00322308	0.0217263	0.0406953	0.0159512	0.023214	0.0241788	0.0311854	0.0283616	0.0308284	0.712869	0.0342439	0.0258479	0.0918518	0.0751193	0.00414058	0.00383257	0.0426356	0.0322775	0.0341554	0.00284772	0.00287909	0.00355958	0.00285593	0.0042976	0.0135738	0.00195976	0.00163662	0.00236479	0	0.00221692	0.00970341	0.00332849	0.00212459	0.00595606	0.00680265	0.00222949	0.437217	0.00510798	0.00597172	0.00911168	0.00313544	0.00223866
ENSG00000204103	MAFB	5.53229	5.33839	4.34128	4.91881	5.11567	4.70524	4.35763	2.15337	2.78892	2.18243	1.40422	1.19022	2.70494	3.2048	2.16913	2.07365	1.84913	1.84488	3.12257	2.36761	5.35798	2.64421	0.400192	4.87577	4.52366	3.89547	3.85113	4.26251	5.43017	4.15131	4.51232	3.28983	2.46054	4.17836	3.3588	4.11721	5.21569	4.73304	3.46856	5.06007	3.61976	2.97635	2.50481	4.0741	5.62714	5.66694	4.40731	5.67214
ENSG00000101057	MYBL2	0.964274	0.920064	0.851269	0.706032	0.884833	0.325346	0.786279	0.14493	0.110252	0.12871	0.198831	0.198357	0.121488	0.118457	0.122933	0.161667	0.139489	0.0970313	0.207808	0.165667	0.91664	3.57913	5.67192	0.695619	0.455362	0.492268	2.22728	0.303779	3.81933	0.329749	0.483532	0.308016	0.296767	0.612587	0.460092	0.674069	1.9004	1.5413	0.122066	0.43453	0.508487	3.09814	0.567633	0.862783	1.90599	1.88044	3.19228	4.89626
ENSG00000100985	MMP9	3.77338	2.83475	0.717995	1.84097	2.14832	1.06381	1.14677	0.554988	0.487692	0.610127	0.481276	0.602407	0.681013	0.577541	0.537433	0.614564	0.580471	0.618273	0.659275	0.666717	2.32339	1.0745	2.85426	0.798259	1.03516	0.880128	1.4799	0.795274	1.03232	0.731694	1.8968	1.10971	1.07857	1.28041	0.895619	1.34848	4.3502	1.47135	0.565186	0.902526	0.882026	0.378673	1.36914	1.04629	1.73511	1.98277	2.75383	5.4689
ENSG00000130700	GATA5	0.0346434	2.04447	2.52933	1.26535	1.0184	0.115334	4.63051	0.0228077	0.0234278	0.0269747	0.030306	0.056129	0.0317659	0.0177483	0.0350497	0.0253374	0.0339741	0.0165727	0.0252693	0.0104451	0.118914	0.0127621	0.0337664	1.8173	2.94882	0.343572	0.323879	1.2544	0.234239	0.58266	4.35542	1.81042	0.657235	2.23278	1.63862	0.593285	2.34028	0.0947552	0.0639807	0.10812	0.794331	0.12965	0.946842	3.08132	0.417727	0.457495	2.96212	0.146291
ENSG00000219438	FAM19A5	1.73158	1.09342	0.885675	5.09661	3.26348	1.60041	2.52093	5.40791	5.54267	5.33451	5.65389	5.66201	5.62404	5.60761	5.43574	5.51971	5.3764	5.26459	5.05528	5.33928	1.66463	0.805661	0.114739	4.07856	4.98553	3.48599	2.25189	2.6691	0.923847	2.69415	3.04388	1.34392	0.536222	1.41749	0.708624	0.918827	1.88917	2.63682	0.702349	5.66709	3.93281	1.14537	3.23048	3.27563	2.68598	2.73694	2.05235	0.362618
[truncated: 6 more columns]
