# Supplementary material for: DNA methylation perturbations may link altered development and aging in the lung
Source: Aging (Albany NY). 2021 Jan 19;13(2):1742–64. doi: 10.18632/aging.202544 (PMC7880367; doi:10.18632/aging.202544)
Supplement: Supplementary Table 11 [file aging-13-202544-s012.xlsx]

## Sheet: Sheet1
Supplementary Table 11. Region-based enrichment analysis using GREAT server for Fetal lung (row 4) and adult lung (row 119) tissue differentially methylated regions (DMRs) with overlapping genes. The coordinates as bed files were uploaded for fetal lung and adult lung dataset to the GREAT server (http://great.stanford.edu/public/html/) as bed files against Human: GRCh37. A filter has been applied…
# GREAT version 4.0.4	Species assembly: hg19	Association rule: Basal+extension: 5000 bp upstream, 1000 bp downstream, 1000000 bp max extension, curated regulatory domains included
# Fetal Lung tissue
# Ontology	ID	Desc	BinomRank	BinomP	BinomBonfP	BinomFdrQ	ExpRegions	ObsRegions	HyperRank	HyperP	HyperBonfP	HyperFdrQ	ExpGenes	ObsGenes	TotalGenes	Regions	Genes
GO Molecular Function	GO:0000981	RNA polymerase II transcription factor activity, sequence-specific DNA binding	1	1.70562e-38	7.11585e-35	7.11585e-35	90.4042	226	1	7.13735e-20	2.97771e-16	2.97771e-16	21.3355	72	764	chr10_118890977_118894180,chr10_118896012_118896776,chr10_8092775_8100761,chr11_12620869_12621248,chr11_19366443_19366793,chr11_2207455_2207660,chr11_2211039_2212133,chr11_2234043_2235450,chr11_2243060_2243685,chr11_2286788_2288051,chr11_2292000_2293665,chr11_2294872_2295729,chr11_2308362_2309287,chr11_2314836_2315339,chr11_31836334_31838674,chr12_54367250_54367460,chr12_54440773_54442075,chr12_5…	ALX1,ASCL2,ATOH1,BACH2,BARHL2,CIR1,DLX4,E2F8,ELF2,ENSG00000273266,FEZF1,FOXD2,FOXE3,FOXG1,FOXJ1,FOXO1,FOXO3,GATA3,GATA4,HAND2,HOXA10,HOXB1,HOXB13,HOXC11,HOXC4,HOXD10,HOXD8,HOXD9,IKZF3,IRX2,ISL1,LMX1A,MEF2C,NEUROD2,NHLH2,NKX6-1,NR2E1,NRF1,PAX5,PAX6,PBX1,PCBP3,PDX1,PITX2,POU3F2,POU4F1,PRDM1,RUNX3,SATB2,SIM1,SIX2,SIX3,SKIL,SMAD1,SOX1,SOX21,SP2,SP6,SP8,SP9,STAT5B,T,TARDBP,TBX20,TEAD1,TFAP2A,TWIST1,VA…
GO Biological Process	GO:0009790	embryo development	72	2.28736e-10	2.95138e-06	4.09914e-08	104.317	169	1	1.85379e-17	2.39194e-13	2.39194e-13	25.301	75	906	chr10_8092775_8100761,chr11_10750074_10750973,chr11_12620869_12621248,chr11_19366443_19366793,chr11_2029309_2029688,chr11_2036573_2037173,chr11_2207455_2207660,chr11_2211039_2212133,chr11_2234043_2235450,chr11_2243060_2243685,chr11_2286788_2288051,chr11_2292000_2293665,chr11_2294872_2295729,chr11_2308362_2309287,chr11_2314836_2315339,chr11_2883529_2884460,chr11_31836334_31838674,chr11_78534072_78…	AATF,ALDH1A2,ALX1,ASCL2,ATOH1,AXIN2,CDKN1C,COBL,COL1A1,COL6A1,COPS3,CTR9,CYR61,E2F8,ENSG00000273266,FOXG1,FZD2,GATA3,GATA4,GNA13,HAND2,HOXA10,HOXA11,HOXB1,HOXB9,HOXC11,HOXC4,HOXC5,HOXD10,HOXD8,HOXD9,IGF2,IRX2,IRX5,ISL1,ITGB3,LMO4,MEF2C,MYO15A,NDEL1,NKX2-6,NOG,NTN1,PAX5,PAX6,PBX1,PDGFC,PDX1,PITX2,PKD2,POLG2,PRDM1,PRDM14,SATB2,SFRP1,SHOX2,SIX2,SIX3,SKIL,SMAD1,SOBP,SOCS3,SP8,SP9,SYF2,T,TBX20,TBX4,TE…
GO Biological Process	GO:0048598	embryonic morphogenesis	77	3.18756e-10	4.11291e-06	5.34144e-08	68.5511	123	2	5.03803e-17	6.50057e-13	3.25029e-13	15.4152	56	552	chr10_8092775_8100761,chr11_10750074_10750973,chr11_2029309_2029688,chr11_2036573_2037173,chr11_2207455_2207660,chr11_2211039_2212133,chr11_2234043_2235450,chr11_2243060_2243685,chr11_2286788_2288051,chr11_2883529_2884460,chr11_31836334_31838674,chr11_78534072_78534297,chr11_78900687_78900896,chr11_78980839_78981869,chr12_54367250_54367460,chr12_54440773_54442075,chr12_54444047_54444985,chr12_544…	ALDH1A2,ALX1,ATOH1,CDKN1C,COBL,COL6A1,CTR9,CYR61,ENSG00000273266,FOXG1,FZD2,GATA3,GATA4,HAND2,HOXA10,HOXA11,HOXB1,HOXC11,HOXC4,HOXD10,HOXD9,IGF2,IRX2,IRX5,ITGB3,LMO4,MEF2C,MYO15A,NOG,NTN1,PAX5,PAX6,PBX1,PDX1,PITX2,PKD2,SATB2,SFRP1,SHOX2,SIX2,SIX3,SMAD1,SOBP,SOCS3,SP8,SP9,SYF2,T,TBX20,TBX4,TENM4,TFAP2A,TH,TWIST1,VEGFC,ZIC1
GO Biological Process	GO:0009887	animal organ morphogenesis	31	8.62835e-13	1.11332e-08	3.59134e-10	106.616	181	3	1.82733e-16	2.3578e-12	7.85932e-13	24.0443	71	861	chr10_8092775_8100761,chr11_122850140_122851122,chr11_12620869_12621248,chr11_2207455_2207660,chr11_2211039_2212133,chr11_2234043_2235450,chr11_2243060_2243685,chr11_2286788_2288051,chr11_31836334_31838674,chr12_54367250_54367460,chr12_54440773_54442075,chr12_54444047_54444985,chr12_54446019_54449761,chr12_85671811_85674531,chr13_107069935_107070047,chr13_112061955_112062791,chr13_112074876_11207…	ALDH1A2,ALX1,ATOH1,AXIN2,BSX,COL1A1,CUL1,CYR61,EFNB2,ENSG00000273266,FOXE3,FOXG1,FOXJ1,FOXO1,FOXO3,FZD2,GATA3,GATA4,HAND2,HOXA11,HOXB1,HOXB13,HOXC11,HOXC4,HOXD10,HOXD11,HOXD8,HOXD9,IRX2,IRX5,ISL1,KRT13,MEF2C,MYO15A,NKX6-1,NOG,NTN1,PARVA,PAX3,PAX5,PAX6,PBX1,PDGFC,PDX1,PITX2,PKD2,POU4F1,PRDM1,RPS6KA1,SATB2,SFRP1,SHOX2,SIX2,SIX3,SLC4A10,SOBP,SOX1,SPRY1,STC1,T,TBR1,TBX20,TBX4,TFAP2A,TGFBR3,TH,TIPARP,…
GO Biological Process	GO:0048568	embryonic organ development	29	5.50583e-13	7.10417e-09	2.44971e-10	51.3728	108	4	4.08346e-16	5.26888e-12	1.31722e-12	11.701	47	419	chr10_8092775_8100761,chr11_12620869_12621248,chr11_19366443_19366793,chr11_2029309_2029688,chr11_2036573_2037173,chr11_2207455_2207660,chr11_2211039_2212133,chr11_2234043_2235450,chr11_2243060_2243685,chr11_2286788_2288051,chr11_2292000_2293665,chr11_2294872_2295729,chr11_2308362_2309287,chr11_2314836_2315339,chr11_2883529_2884460,chr11_31836334_31838674,chr12_54367250_54367460,chr12_54440773_54…	ALDH1A2,ALX1,ASCL2,ATOH1,CDKN1C,COBL,CYR61,E2F8,ENSG00000273266,FOXG1,FZD2,GATA3,GATA4,HAND2,HOXA11,HOXB1,HOXC11,HOXC4,HOXD10,HOXD9,IGF2,IRX5,MEF2C,MYO15A,NKX2-6,NOG,NTN1,PAX5,PAX6,PBX1,PITX2,PKD2,PRDM1,SATB2,SHOX2,SIX2,SIX3,SOBP,SOCS3,SYF2,T,TBX20,TEAD1,TFAP2A,TH,TWIST1,ZIC1
GO Molecular Function	GO:0001067	regulatory region nucleic acid binding	4	2.24062e-31	9.34789e-28	2.33697e-28	91.3718	212	6	9.744e-15	4.0652e-11	6.77533e-12	23.5975	67	845	chr10_118890977_118894180,chr10_118896012_118896776,chr10_8092775_8100761,chr11_12620869_12621248,chr11_19366443_19366793,chr11_2207455_2207660,chr11_2211039_2212133,chr11_2234043_2235450,chr11_2243060_2243685,chr11_2286788_2288051,chr11_2292000_2293665,chr11_2294872_2295729,chr11_2308362_2309287,chr11_2314836_2315339,chr11_31836334_31838674,chr12_54367250_54367460,chr12_54440773_54442075,chr12_5…	ALX1,ASCL2,ATOH1,BACH2,BARHL2,CBX4,CDK12,DLX4,E2F8,ENSG00000273266,FEZF1,FOXJ1,FOXO3,GATA3,GATA4,HAND2,HOXA10,HOXB1,HOXB9,HOXC11,HOXC4,HOXD10,HOXD8,HOXD9,IKZF3,ISL1,LMO4,LMX1A,MEF2C,NEUROD2,NEUROG2,NHLH2,NKX6-1,NRF1,PAX5,PAX6,PBX1,PDX1,PITX2,POU3F2,POU4F1,PRDM1,PRDM14,RPTOR,RUNX3,SATB2,SIX2,SIX3,SKIL,SMAD1,SOX1,SOX21,SP2,STAT5B,SUZ12,T,TBL1XR1,TBR1,TBX18,TBX20,TEAD1,TFAP2A,TIPARP,TWIST1,VAX1,VEZF…
GO Molecular Function	GO:0001012	RNA polymerase II regulatory region DNA binding	6	9.92468e-30	4.14058e-26	6.90096e-27	69.1984	175	3	5.08877e-15	2.12303e-11	7.07678e-12	17.1187	56	613	chr10_118890977_118894180,chr10_118896012_118896776,chr10_8092775_8100761,chr11_19366443_19366793,chr11_2207455_2207660,chr11_2211039_2212133,chr11_2234043_2235450,chr11_2243060_2243685,chr11_2286788_2288051,chr11_2292000_2293665,chr11_2294872_2295729,chr11_2308362_2309287,chr11_2314836_2315339,chr11_31836334_31838674,chr12_54367250_54367460,chr12_54440773_54442075,chr12_54444047_54444985,chr12_5…	ALX1,ASCL2,ATOH1,BACH2,BARHL2,DLX4,E2F8,ENSG00000273266,FEZF1,FOXJ1,GATA3,GATA4,HAND2,HOXA10,HOXB1,HOXB9,HOXC11,HOXC4,HOXD10,HOXD8,HOXD9,IKZF3,ISL1,LMX1A,MEF2C,NEUROD2,NHLH2,NKX6-1,NRF1,PAX5,PAX6,PBX1,PDX1,PITX2,POU3F2,POU4F1,PRDM1,PRDM14,RUNX3,SATB2,SIX2,SIX3,SKIL,SMAD1,SOX1,SOX21,SP2,STAT5B,SUZ12,T,TBR1,TBX20,TFAP2A,VAX1,VEZF1,ZIC1
GO Molecular Function	GO:0000975	regulatory region DNA binding	3	1.8132e-31	7.56467e-28	2.52156e-28	91.2291	212	5	9.20073e-15	3.83855e-11	7.67709e-12	23.5696	67	844	chr10_118890977_118894180,chr10_118896012_118896776,chr10_8092775_8100761,chr11_12620869_12621248,chr11_19366443_19366793,chr11_2207455_2207660,chr11_2211039_2212133,chr11_2234043_2235450,chr11_2243060_2243685,chr11_2286788_2288051,chr11_2292000_2293665,chr11_2294872_2295729,chr11_2308362_2309287,chr11_2314836_2315339,chr11_31836334_31838674,chr12_54367250_54367460,chr12_54440773_54442075,chr12_5…	ALX1,ASCL2,ATOH1,BACH2,BARHL2,CBX4,CDK12,DLX4,E2F8,ENSG00000273266,FEZF1,FOXJ1,FOXO3,GATA3,GATA4,HAND2,HOXA10,HOXB1,HOXB9,HOXC11,HOXC4,HOXD10,HOXD8,HOXD9,IKZF3,ISL1,LMO4,LMX1A,MEF2C,NEUROD2,NEUROG2,NHLH2,NKX6-1,NRF1,PAX5,PAX6,PBX1,PDX1,PITX2,POU3F2,POU4F1,PRDM1,PRDM14,RPTOR,RUNX3,SATB2,SIX2,SIX3,SKIL,SMAD1,SOX1,SOX21,SP2,STAT5B,SUZ12,T,TBL1XR1,TBR1,TBX18,TBX20,TEAD1,TFAP2A,TIPARP,TWIST1,VAX1,VEZF…
GO Molecular Function	GO:0044212	transcription regulatory region DNA binding	2	1.61535e-31	6.73925e-28	3.36962e-28	91.1513	212	4	8.20084e-15	3.42139e-11	8.55348e-12	23.5137	67	842	chr10_118890977_118894180,chr10_118896012_118896776,chr10_8092775_8100761,chr11_12620869_12621248,chr11_19366443_19366793,chr11_2207455_2207660,chr11_2211039_2212133,chr11_2234043_2235450,chr11_2243060_2243685,chr11_2286788_2288051,chr11_2292000_2293665,chr11_2294872_2295729,chr11_2308362_2309287,chr11_2314836_2315339,chr11_31836334_31838674,chr12_54367250_54367460,chr12_54440773_54442075,chr12_5…	ALX1,ASCL2,ATOH1,BACH2,BARHL2,CBX4,CDK12,DLX4,E2F8,ENSG00000273266,FEZF1,FOXJ1,FOXO3,GATA3,GATA4,HAND2,HOXA10,HOXB1,HOXB9,HOXC11,HOXC4,HOXD10,HOXD8,HOXD9,IKZF3,ISL1,LMO4,LMX1A,MEF2C,NEUROD2,NEUROG2,NHLH2,NKX6-1,NRF1,PAX5,PAX6,PBX1,PDX1,PITX2,POU3F2,POU4F1,PRDM1,PRDM14,RPTOR,RUNX3,SATB2,SIX2,SIX3,SKIL,SMAD1,SOX1,SOX21,SP2,STAT5B,SUZ12,T,TBL1XR1,TBR1,TBX18,TBX20,TEAD1,TFAP2A,TIPARP,TWIST1,VAX1,VEZF…
GO Molecular Function	GO:0000977	RNA polymerase II regulatory region sequence-specific DNA binding	5	6.13315e-30	2.55875e-26	5.1175e-27	68.9107	175	2	4.42024e-15	1.84412e-11	9.22061e-12	17.0628	56	611	chr10_118890977_118894180,chr10_118896012_118896776,chr10_8092775_8100761,chr11_19366443_19366793,chr11_2207455_2207660,chr11_2211039_2212133,chr11_2234043_2235450,chr11_2243060_2243685,chr11_2286788_2288051,chr11_2292000_2293665,chr11_2294872_2295729,chr11_2308362_2309287,chr11_2314836_2315339,chr11_31836334_31838674,chr12_54367250_54367460,chr12_54440773_54442075,chr12_54444047_54444985,chr12_5…	ALX1,ASCL2,ATOH1,BACH2,BARHL2,DLX4,E2F8,ENSG00000273266,FEZF1,FOXJ1,GATA3,GATA4,HAND2,HOXA10,HOXB1,HOXB9,HOXC11,HOXC4,HOXD10,HOXD8,HOXD9,IKZF3,ISL1,LMX1A,MEF2C,NEUROD2,NHLH2,NKX6-1,NRF1,PAX5,PAX6,PBX1,PDX1,PITX2,POU3F2,POU4F1,PRDM1,PRDM14,RUNX3,SATB2,SIX2,SIX3,SKIL,SMAD1,SOX1,SOX21,SP2,STAT5B,SUZ12,T,TBR1,TBX20,TFAP2A,VAX1,VEZF1,ZIC1
GO Molecular Function	GO:0000976	transcription regulatory region sequence-specific DNA binding	7	2.41742e-28	1.00855e-24	1.44078e-25	77.0984	184	7	5.72772e-14	2.38961e-10	3.41372e-11	19.241	58	689	chr10_118890977_118894180,chr10_118896012_118896776,chr10_8092775_8100761,chr11_19366443_19366793,chr11_2207455_2207660,chr11_2211039_2212133,chr11_2234043_2235450,chr11_2243060_2243685,chr11_2286788_2288051,chr11_2292000_2293665,chr11_2294872_2295729,chr11_2308362_2309287,chr11_2314836_2315339,chr11_31836334_31838674,chr12_54367250_54367460,chr12_54440773_54442075,chr12_54444047_54444985,chr12_5…	ALX1,ASCL2,ATOH1,BACH2,BARHL2,DLX4,E2F8,ENSG00000273266,FEZF1,FOXJ1,GATA3,GATA4,HAND2,HOXA10,HOXB1,HOXB9,HOXC11,HOXC4,HOXD10,HOXD8,HOXD9,IKZF3,ISL1,LMO4,LMX1A,MEF2C,NEUROD2,NHLH2,NKX6-1,NRF1,PAX5,PAX6,PBX1,PDX1,PITX2,POU3F2,POU4F1,PRDM1,PRDM14,RUNX3,SATB2,SIX2,SIX3,SKIL,SMAD1,SOX1,SOX21,SP2,STAT5B,SUZ12,T,TBR1,TBX18,TBX20,TFAP2A,VAX1,VEZF1,ZIC1
GO Molecular Function	GO:1990837	sequence-specific double-stranded DNA binding	8	7.96006e-28	3.32094e-24	4.15117e-25	79.9026	187	8	1.76637e-13	7.36931e-10	9.21164e-11	20.3301	59	728	chr10_118890977_118894180,chr10_118896012_118896776,chr10_8092775_8100761,chr11_19366443_19366793,chr11_2207455_2207660,chr11_2211039_2212133,chr11_2234043_2235450,chr11_2243060_2243685,chr11_2286788_2288051,chr11_2292000_2293665,chr11_2294872_2295729,chr11_2308362_2309287,chr11_2314836_2315339,chr11_31836334_31838674,chr12_54367250_54367460,chr12_54440773_54442075,chr12_54444047_54444985,chr12_5…	ALX1,ASCL2,ATOH1,BACH2,BARHL2,DLX4,E2F8,ENSG00000273266,FEZF1,FOXJ1,GATA3,GATA4,HAND2,HOXA10,HOXB1,HOXB9,HOXC11,HOXC4,HOXD10,HOXD8,HOXD9,IKZF3,ISL1,LMO4,LMX1A,MEF2C,NEUROD2,NHLH2,NKX6-1,NRF1,PAX5,PAX6,PBX1,PDX1,PITX2,POU3F2,POU4F1,PRDM1,PRDM14,RPTOR,RUNX3,SATB2,SIX2,SIX3,SKIL,SMAD1,SOX1,SOX21,SP2,STAT5B,SUZ12,T,TBR1,TBX18,TBX20,TFAP2A,VAX1,VEZF1,ZIC1
GO Biological Process	GO:0007389	pattern specification process	52	1.4387e-11	1.85636e-07	3.56992e-09	49.9957	102	5	5.92077e-14	7.63957e-10	1.52791e-10	11.338	43	406	chr10_119301464_119306659,chr11_31836334_31838674,chr12_54367250_54367460,chr12_54440773_54442075,chr12_54444047_54444985,chr12_54446019_54449761,chr12_85671811_85674531,chr13_112061955_112062791,chr13_112074876_112074910,chr13_112212075_112212266,chr13_112507698_112508206,chr13_112555823_112555987,chr13_112575212_112575735,chr13_112628189_112628792,chr13_112630296_112631672,chr13_112632730_11263…	ALDH1A2,ALX1,AXIN2,COBL,EMX2,ENSG00000273266,FEZF1,FOXG1,FOXJ1,GATA4,HAND2,HOXA10,HOXA11,HOXB1,HOXB9,HOXC11,HOXC4,HOXC5,HOXD10,HOXD11,HOXD8,HOXD9,IRX2,ISL1,MEF2C,NKX6-1,NOG,PAX6,PBX1,PITX2,PKD2,SATB2,SFRP1,SIX2,SIX3,SMAD1,SOX1,SP8,STC1,T,TBR1,TBX20,ZIC1
GO Molecular Function	GO:0001228	transcriptional activator activity, RNA polymerase II transcription regulatory region sequence-specific binding	15	6.06313e-24	2.52954e-20	1.68636e-21	50.4777	133	9	3.64297e-13	1.51985e-09	1.68872e-10	11.4497	42	410	chr10_8092775_8100761,chr11_31836334_31838674,chr12_54367250_54367460,chr12_54440773_54442075,chr12_54444047_54444985,chr12_54446019_54449761,chr12_85671811_85674531,chr13_112061955_112062791,chr13_112074876_112074910,chr13_112212075_112212266,chr13_112507698_112508206,chr13_112555823_112555987,chr13_112575212_112575735,chr13_112628189_112628792,chr13_112630296_112631672,chr13_112632730_112633175…	ALX1,ATOH1,BARHL2,ENSG00000273266,FOXD2,FOXJ1,FOXO3,GATA3,GATA4,HAND2,HOXA10,HOXB1,HOXC11,HOXC4,HOXD10,HOXD8,IKZF3,ISL1,LMX1A,MEF2C,NEUROD2,NHLH2,NR2E1,NRF1,PAX5,PAX6,PBX1,PITX2,POU3F2,POU4F1,SATB2,SIX2,SIX3,SMAD1,SOX1,SOX21,STAT5B,TARDBP,TBX20,TFAP2A,VEZF1,ZIC1
GO Molecular Function	GO:0003690	double-stranded DNA binding	10	1.20531e-27	5.02856e-24	5.02856e-25	84.9485	194	10	4.12548e-13	1.72115e-09	1.72115e-10	22.5084	62	806	chr10_118890977_118894180,chr10_118896012_118896776,chr10_8092775_8100761,chr11_19366443_19366793,chr11_2207455_2207660,chr11_2211039_2212133,chr11_2234043_2235450,chr11_2243060_2243685,chr11_2286788_2288051,chr11_2292000_2293665,chr11_2294872_2295729,chr11_2308362_2309287,chr11_2314836_2315339,chr11_31836334_31838674,chr12_54367250_54367460,chr12_54440773_54442075,chr12_54444047_54444985,chr12_5…	ALX1,ASCL2,ATOH1,BACH2,BARHL2,DLX4,E2F8,ENSG00000273266,FEZF1,FOXJ1,GATA3,GATA4,HAND2,HOXA10,HOXB1,HOXB9,HOXC11,HOXC4,HOXD10,HOXD8,HOXD9,IKZF3,ISL1,LMO4,LMX1A,MEF2C,MND1,NEUROD2,NHLH2,NKX6-1,NRF1,PAX5,PAX6,PBX1,PCBP3,PDX1,PITX2,POU3F2,POU4F1,PRDM1,PRDM14,RPTOR,RUNX3,SATB2,SIX2,SIX3,SKIL,SMAD1,SOX1,SOX21,SP2,STAT5B,SUZ12,T,TARDBP,TBR1,TBX18,TBX20,TFAP2A,VAX1,VEZF1,ZIC1
GO Biological Process	GO:0003002	regionalization	40	5.38589e-12	6.94942e-08	1.73735e-09	39.5344	88	6	1.24402e-13	1.60516e-09	2.67526e-10	8.74085	37	313	chr10_119301464_119306659,chr11_31836334_31838674,chr12_54367250_54367460,chr12_54440773_54442075,chr12_54444047_54444985,chr12_54446019_54449761,chr12_85671811_85674531,chr13_112061955_112062791,chr13_112074876_112074910,chr13_112212075_112212266,chr13_112507698_112508206,chr13_112555823_112555987,chr13_112575212_112575735,chr13_112628189_112628792,chr13_112630296_112631672,chr13_112632730_11263…	ALDH1A2,ALX1,AXIN2,COBL,EMX2,ENSG00000273266,FEZF1,FOXG1,FOXJ1,GATA4,HOXA10,HOXA11,HOXB1,HOXB9,HOXC11,HOXC4,HOXC5,HOXD10,HOXD11,HOXD8,HOXD9,IRX2,ISL1,MEF2C,NKX6-1,NOG,PAX6,PBX1,PITX2,SFRP1,SIX2,SIX3,SOX1,SP8,T,TBR1,TBX20
GO Biological Process	GO:0048562	embryonic organ morphogenesis	73	2.40894e-10	3.10825e-06	4.25788e-08	36.4524	79	7	7.15105e-13	9.22699e-09	1.31814e-09	7.87514	34	282	chr10_8092775_8100761,chr11_2207455_2207660,chr11_2211039_2212133,chr11_2234043_2235450,chr11_2243060_2243685,chr11_2286788_2288051,chr11_31836334_31838674,chr12_54367250_54367460,chr12_54440773_54442075,chr12_54444047_54444985,chr12_54446019_54449761,chr12_85671811_85674531,chr14_29234671_29236535,chr16_54971007_54973966,chr17_18011513_18012007,chr17_18011513_18012007,chr17_18011513_18012007,chr…	ALX1,ATOH1,ENSG00000273266,FOXG1,FZD2,GATA3,GATA4,HAND2,HOXA11,HOXB1,HOXC11,HOXC4,HOXD10,HOXD9,IRX5,MEF2C,MYO15A,NOG,NTN1,PAX5,PAX6,PITX2,PKD2,SATB2,SHOX2,SIX2,SIX3,SOBP,T,TBX20,TFAP2A,TH,TWIST1,ZIC1
GO Biological Process	GO:0043009	chordate embryonic development	74	2.42483e-10	3.12876e-06	4.22806e-08	62.2196	115	8	3.76524e-12	4.85829e-08	6.07286e-09	15.499	48	555	chr10_8092775_8100761,chr11_10750074_10750973,chr11_19366443_19366793,chr11_2029309_2029688,chr11_2036573_2037173,chr11_2207455_2207660,chr11_2211039_2212133,chr11_2234043_2235450,chr11_2243060_2243685,chr11_2286788_2288051,chr11_2292000_2293665,chr11_2294872_2295729,chr11_2308362_2309287,chr11_2314836_2315339,chr11_2883529_2884460,chr11_31836334_31838674,chr12_54367250_54367460,chr12_54440773_54…	ALDH1A2,ALX1,ASCL2,AXIN2,CDKN1C,COBL,COL1A1,COPS3,CTR9,CYR61,E2F8,FZD2,GATA3,GNA13,HAND2,HOXA11,HOXB1,HOXB9,HOXC11,HOXC5,HOXD10,HOXD9,IGF2,IRX5,ISL1,LMO4,MEF2C,NDEL1,NKX2-6,NOG,PAX5,PAX6,PBX1,PITX2,PKD2,POLG2,PRDM1,PRDM14,SATB2,SFRP1,SHOX2,SIX2,SKIL,SOCS3,SYF2,T,TFAP2A,TWIST1
GO Biological Process	GO:0009792	embryo development ending in birth or egg hatching	78	3.35557e-10	4.32969e-06	5.55088e-08	62.571	115	9	5.19149e-12	6.69857e-08	7.44286e-09	15.6386	48	560	chr10_8092775_8100761,chr11_10750074_10750973,chr11_19366443_19366793,chr11_2029309_2029688,chr11_2036573_2037173,chr11_2207455_2207660,chr11_2211039_2212133,chr11_2234043_2235450,chr11_2243060_2243685,chr11_2286788_2288051,chr11_2292000_2293665,chr11_2294872_2295729,chr11_2308362_2309287,chr11_2314836_2315339,chr11_2883529_2884460,chr11_31836334_31838674,chr12_54367250_54367460,chr12_54440773_54…	ALDH1A2,ALX1,ASCL2,AXIN2,CDKN1C,COBL,COL1A1,COPS3,CTR9,CYR61,E2F8,FZD2,GATA3,GNA13,HAND2,HOXA11,HOXB1,HOXB9,HOXC11,HOXC5,HOXD10,HOXD9,IGF2,IRX5,ISL1,LMO4,MEF2C,NDEL1,NKX2-6,NOG,PAX5,PAX6,PBX1,PITX2,PKD2,POLG2,PRDM1,PRDM14,SATB2,SFRP1,SHOX2,SIX2,SKIL,SOCS3,SYF2,T,TFAP2A,TWIST1
GO Molecular Function	GO:0000982	transcription factor activity, RNA polymerase II core promoter proximal region sequence-specific binding	9	8.22017e-28	3.42945e-24	3.8105e-25	54.1296	147	11	4.17581e-11	1.74215e-07	1.58377e-08	11.1146	38	398	chr10_8092775_8100761,chr11_12620869_12621248,chr11_19366443_19366793,chr11_2207455_2207660,chr11_2211039_2212133,chr11_2234043_2235450,chr11_2243060_2243685,chr11_2286788_2288051,chr11_2292000_2293665,chr11_2294872_2295729,chr11_2308362_2309287,chr11_2314836_2315339,chr11_31836334_31838674,chr12_54367250_54367460,chr13_112061955_112062791,chr13_112074876_112074910,chr13_112212075_112212266,chr13…	ASCL2,ATOH1,BARHL2,DLX4,E2F8,FEZF1,FOXJ1,FOXO1,GATA3,HAND2,HOXA10,HOXB1,HOXC11,ISL1,MEF2C,NHLH2,NKX6-1,NR2E1,NRF1,PAX5,PAX6,PBX1,PITX2,POU3F2,POU4F1,PRDM1,SATB2,SIX2,SKIL,SMAD1,SOX1,SOX21,SP2,STAT5B,TBX20,TEAD1,TFAP2A,ZIC1
GO Biological Process	GO:0006366	transcription from RNA polymerase II promoter	8	4.45555e-19	5.749e-15	7.18624e-16	78.3174	163	10	1.85918e-11	2.3989e-07	2.3989e-08	22.7318	59	814	chr10_8092775_8100761,chr11_10750074_10750973,chr11_12620869_12621248,chr11_31836334_31838674,chr12_54367250_54367460,chr12_54440773_54442075,chr12_54444047_54444985,chr12_54446019_54449761,chr12_85671811_85674531,chr13_112061955_112062791,chr13_112074876_112074910,chr13_112212075_112212266,chr13_112507698_112508206,chr13_112555823_112555987,chr13_112575212_112575735,chr13_112628189_112628792,chr…	ALX1,ATOH1,BACH2,BARHL2,CCNC,CCRN4L,CDK12,CTR9,ELP4,ENSG00000273266,FOXD2,FOXE3,FOXJ1,FOXO3,GATA3,GATA4,HAND2,HOXA10,HOXB1,HOXC11,HOXC4,HOXD10,HOXD8,IKZF3,ISL1,LMO4,LMX1A,MAML3,MEF2C,NEUROD2,NHLH2,NKX6-1,NR2E1,NRF1,PAX3,PAX5,PAX6,PBX1,PDX1,PITX2,POU3F2,POU4F1,RNGTT,RUNX3,SATB2,SIX2,SIX3,SMAD1,SOX1,SOX21,SRSF2,STAT5B,TARDBP,TBX20,TEAD1,TFAP2A,TSC22D1,VEZF1,ZIC1
GO Biological Process	GO:0001501	skeletal system development	260	1.48633e-05	0.191781	0.00073762	56.8222	90	11	2.27306e-11	2.93292e-07	2.66629e-08	12.9856	42	465	chr10_22725204_22725885,chr11_2029309_2029688,chr11_2036573_2037173,chr11_2883529_2884460,chr12_54367250_54367460,chr12_54440773_54442075,chr12_54444047_54444985,chr12_54446019_54449761,chr12_85671811_85674531,chr13_37495632_37495847,chr16_54971007_54973966,chr17_46522464_46522513,chr17_46522464_46522513,chr17_46522464_46522513,chr17_46534400_46534794,chr17_46534400_46534794,chr17_46534400_465347…	ALX1,AXIN2,CDKN1C,COL1A1,CYR61,ENSG00000273266,HAND2,HOXA10,HOXA11,HOXA13,HOXB1,HOXB9,HOXC11,HOXC4,HOXC5,HOXD10,HOXD8,HOXD9,IGF2,IRX5,MEF2C,NOG,PAX5,PBX1,PDGFC,PIP4K2A,PITX2,RUNX3,SATB2,SFRP1,SHOX2,SIX2,SLC38A10,SMAD1,SMAD9,STC1,T,TBX4,TFAP2A,TIPARP,TWIST1,WASF2
GO Biological Process	GO:0060284	regulation of cell development	332	8.10509e-05	1	0.00315	109.069	148	12	4.11262e-11	5.30651e-07	4.42209e-08	22.5642	58	808	chr10_118890977_118894180,chr10_118896012_118896776,chr10_128993115_128993810,chr10_8092775_8100761,chr11_111809582_111810533,chr11_111845646_111846087,chr11_111847475_111848638,chr11_2207455_2207660,chr11_2211039_2212133,chr11_2234043_2235450,chr11_2243060_2243685,chr11_2286788_2288051,chr11_2292000_2293665,chr11_2294872_2295729,chr11_2308362_2309287,chr11_2314836_2315339,chr11_31836334_31838674…	ARHGDIA,ARHGEF7,ASCL2,ATOH1,AXIN2,BAIAP2,BARHL2,CASZ1,CDK5RAP3,CNR1,COBL,CSNK1D,DCT,DIXDC1,DOCK1,EDNRB,EFNB2,EPHA7,FEZF1,FGA,FGG,FOXG1,FOXO3,GATA3,GPR183,HDAC9,HOXA11,ISL1,KIAA1598,LMX1A,LPAR3,MEF2C,NDEL1,NEUROD2,NKX6-1,NOG,NR2E1,NTN1,OTP,PAX6,PBX1,POU3F2,POU4F1,PTPRG,RAP1GAP2,RAP2A,SFRP1,SHOX2,SIX3,SKIL,SRCIN1,TBR1,TENM4,TIMP2,TLR2,TLX3,VAX1,VEGFC
GO Biological Process	GO:0007417	central nervous system development	166	3.73807e-07	0.00482323	2.90556e-05	114.433	167	13	1.06012e-10	1.36787e-06	1.05221e-07	24.3794	60	873	chr10_118890977_118894180,chr10_118896012_118896776,chr10_119301464_119306659,chr11_111809582_111810533,chr11_111845646_111846087,chr11_111847475_111848638,chr11_122850140_122851122,chr11_19366443_19366793,chr11_2207455_2207660,chr11_2211039_2212133,chr11_2234043_2235450,chr11_2243060_2243685,chr11_2286788_2288051,chr11_31836334_31838674,chr11_78534072_78534297,chr11_78900687_78900896,chr11_78980…	ALDH1A2,ATOH1,BAIAP2,C11orf63,CDK5RAP3,CDKN2C,COL4A1,DCT,DIXDC1,EMX2,EPHA7,FEZF1,FOXG1,FOXJ1,FOXO3,HOXB1,HOXD10,IRS2,ISL1,LMO4,LMX1A,NAV2,NDEL1,NEUROD2,NHLH2,NKX2-6,NKX6-1,NOG,NPTX1,NR2E1,OTP,PAX5,PAX6,PDGFC,PDX1,PITX2,PKD2,POU3F2,POU4F1,PTPRG,SATB2,SIX3,SLC4A10,SLC7A11,SMAD1,SMAD9,SOX1,STMN1,SYNGR3,TBR1,TBX20,TENM4,TFAP2A,TH,TIMP2,TLR2,TLX3,VAX1,ZIC1,ZIC2
GO Biological Process	GO:0048729	tissue morphogenesis	422	0.000286924	1	0.00877294	65.273	94	14	1.27043e-10	1.63924e-06	1.17088e-07	14.2702	43	511	chr10_8092775_8100761,chr12_85671811_85674531,chr13_107069935_107070047,chr13_110768493_110768683,chr13_28491809_28494177,chr13_34250922_34251239,chr13_79168044_79168573,chr13_79169714_79171679,chr13_79181021_79184529,chr15_58357204_58358811,chr17_42705761_42706084,chr17_42705761_42706084,chr17_42705761_42706084,chr17_45307312_45307606,chr17_45307312_45307606,chr17_45307312_45307606,chr17_4682429…	ALDH1A2,ALX1,COBL,COL4A1,CYR61,EFNB2,EPHA7,FZD2,GATA3,GATA4,GNA13,HAND2,HOXA11,HOXB13,HOXD11,IRX2,ISL1,ITGB3,LMO4,MEF2C,NOG,NTN1,PBX1,PDX1,PITX2,PKD2,POU4F1,SFRP1,SHOX2,SIX2,SIX3,SMAD1,SOCS3,SPRY1,STARD13,STC1,T,TBX20,TBX4,TFAP2A,TGFBR3,TWIST1,VEGFC
GO Biological Process	GO:0048706	embryonic skeletal system development	134	7.22594e-08	0.000932363	6.95793e-06	18.3555	45	15	2.02649e-10	2.61477e-06	1.74318e-07	3.4349	20	123	chr12_54367250_54367460,chr12_54440773_54442075,chr12_85671811_85674531,chr16_54971007_54973966,chr17_46522464_46522513,chr17_46522464_46522513,chr17_46522464_46522513,chr17_46534400_46534794,chr17_46534400_46534794,chr17_46534400_46534794,chr17_46570458_46570504,chr17_46570458_46570504,chr17_46570458_46570504,chr17_46604235_46604774,chr17_46604235_46604774,chr17_46604235_46604774,chr17_46795860_…	ALX1,COL1A1,HOXA11,HOXB1,HOXB9,HOXC11,HOXC5,HOXD10,HOXD9,IRX5,MEF2C,NOG,PAX5,PBX1,SATB2,SHOX2,SIX2,T,TFAP2A,TWIST1
GO Biological Process	GO:0009952	anterior/posterior pattern specification	241	8.83399e-06	0.113985	0.000472967	22.7563	46	16	2.78127e-10	3.58867e-06	2.24292e-07	5.50143	25	197	chr10_119301464_119306659,chr11_31836334_31838674,chr12_54367250_54367460,chr12_54440773_54442075,chr12_54444047_54444985,chr12_54446019_54449761,chr12_85671811_85674531,chr15_58357204_58358811,chr17_46522464_46522513,chr17_46522464_46522513,chr17_46522464_46522513,chr17_46534400_46534794,chr17_46534400_46534794,chr17_46534400_46534794,chr17_46570458_46570504,chr17_46570458_46570504,chr17_4657045…	ALDH1A2,ALX1,AXIN2,COBL,EMX2,ENSG00000273266,FEZF1,GATA4,HOXA10,HOXA11,HOXB1,HOXB9,HOXC11,HOXC4,HOXC5,HOXD10,HOXD8,HOXD9,NOG,PAX6,PBX1,SFRP1,SIX2,SIX3,T
GO Biological Process	GO:0050767	regulation of neurogenesis	367	0.000134428	1	0.00472623	98.8693	135	17	3.14378e-10	4.05642e-06	2.38613e-07	19.4086	51	695	chr10_118890977_118894180,chr10_118896012_118896776,chr10_8092775_8100761,chr11_111809582_111810533,chr11_111845646_111846087,chr11_111847475_111848638,chr11_2207455_2207660,chr11_2211039_2212133,chr11_2234043_2235450,chr11_2243060_2243685,chr11_2286788_2288051,chr11_2292000_2293665,chr11_2294872_2295729,chr11_2308362_2309287,chr11_2314836_2315339,chr11_31836334_31838674,chr11_78534072_78534297,c…	ARHGDIA,ASCL2,ATOH1,BAIAP2,BARHL2,CASZ1,CDK5RAP3,CNR1,COBL,CSNK1D,DCT,DIXDC1,EDNRB,EFNB2,EPHA7,FEZF1,FOXG1,FOXO3,GATA3,GPR183,ISL1,KIAA1598,LMX1A,LPAR3,MEF2C,NDEL1,NEUROD2,NKX6-1,NOG,NR2E1,NTN1,OTP,PAX6,PBX1,POU3F2,POU4F1,PTPRG,RAP1GAP2,RAP2A,SFRP1,SHOX2,SIX3,SKIL,SRCIN1,TBR1,TENM4,TIMP2,TLR2,TLX3,VAX1,VEGFC
GO Biological Process	GO:0016477	cell migration	113	1.37313e-08	0.000177175	1.56792e-06	89.0993	143	18	8.08501e-10	1.04321e-05	5.7956e-07	22.4525	55	804	chr10_118890977_118894180,chr10_118896012_118896776,chr10_119301464_119306659,chr10_128993115_128993810,chr10_8092775_8100761,chr11_111809582_111810533,chr11_111845646_111846087,chr11_111847475_111848638,chr11_12620869_12621248,chr11_31836334_31838674,chr12_85671811_85674531,chr13_100085073_100085455,chr13_107069935_107070047,chr13_112061955_112062791,chr13_112074876_112074910,chr13_112212075_112…	ALX1,ATOH1,BARHL2,CCL8,CCR7,COL1A1,CYR61,DIXDC1,DOCK1,EDNRB,EFNB2,EMX2,ENPEP,FEZF1,FOXG1,FOXJ1,GAS6,GATA3,GPC6,GPR183,GRB7,HAND2,HOXB9,ISL1,ITGB3,KIAA1598,MCOLN2,MEF2C,MYO18A,NDEL1,NKX6-1,NR2E1,NTN1,PARVA,PAX6,PITX2,PKN2,PODXL2,POU3F2,POU4F1,SATB2,SIX2,SIX3,SLC7A11,SOX1,STARD13,STAT5B,T,TBX20,TGFBR3,TLX3,TWIST1,VAX1,VEGFC,WASF2
GO Molecular Function	GO:0001159	core promoter proximal region DNA binding	13	1.57713e-24	6.57977e-21	5.06136e-22	46.0637	127	12	1.7645e-09	7.36149e-06	6.13458e-07	10.4723	34	375	chr10_8092775_8100761,chr11_12620869_12621248,chr11_19366443_19366793,chr11_2207455_2207660,chr11_2211039_2212133,chr11_2234043_2235450,chr11_2243060_2243685,chr11_2286788_2288051,chr11_2292000_2293665,chr11_2294872_2295729,chr11_2308362_2309287,chr11_2314836_2315339,chr11_31836334_31838674,chr12_54367250_54367460,chr13_112061955_112062791,chr13_112074876_112074910,chr13_112212075_112212266,chr13…	ASCL2,ATOH1,DLX4,E2F8,FEZF1,FOXJ1,GATA3,HOXA10,HOXB1,HOXC11,ISL1,MEF2C,NHLH2,NKX6-1,NRF1,PAX5,PAX6,PBX1,PDX1,PITX2,POU3F2,PRDM1,SATB2,SIX2,SKIL,SMAD1,SOX1,SOX21,SP2,T,TBX20,TEAD1,TFAP2A,ZIC1
GO Molecular Function	GO:0001077	transcriptional activator activity, RNA polymerase II core promoter proximal region sequence-specific binding	16	1.62655e-19	6.78595e-16	4.24122e-17	37.2834	102	13	3.06145e-09	1.27724e-05	9.82492e-07	7.59588	28	272	chr10_8092775_8100761,chr11_31836334_31838674,chr12_54367250_54367460,chr13_112061955_112062791,chr13_112074876_112074910,chr13_112212075_112212266,chr13_112507698_112508206,chr13_112555823_112555987,chr13_112575212_112575735,chr13_112628189_112628792,chr13_112630296_112631672,chr13_112632730_112633175,chr13_112720171_112721425,chr13_112722719_112724583,chr13_112725605_112727160,chr13_112728349_1…	ATOH1,BARHL2,FOXJ1,GATA3,HAND2,HOXA10,HOXB1,HOXC11,ISL1,MEF2C,NHLH2,NR2E1,NRF1,PAX5,PAX6,PBX1,PITX2,POU3F2,POU4F1,SATB2,SIX2,SMAD1,SOX1,SOX21,STAT5B,TBX20,TFAP2A,ZIC1
GO Biological Process	GO:0001764	neuron migration	23	4.45112e-14	5.74328e-10	2.49708e-11	20.4875	62	19	1.71462e-09	2.21237e-05	1.1644e-06	3.09979	18	111	chr10_118890977_118894180,chr10_118896012_118896776,chr10_8092775_8100761,chr11_31836334_31838674,chr13_112061955_112062791,chr13_112074876_112074910,chr13_112212075_112212266,chr13_112507698_112508206,chr13_112555823_112555987,chr13_112575212_112575735,chr13_112628189_112628792,chr13_112630296_112631672,chr13_112632730_112633175,chr13_112720171_112721425,chr13_112722719_112724583,chr13_112725605…	ATOH1,BARHL2,FEZF1,FOXG1,GAS6,GATA3,MEF2C,NDEL1,NKX6-1,NTN1,PAX6,PITX2,SATB2,SOX1,TBX20,TLX3,TWIST1,VAX1
GO Biological Process	GO:0030182	neuron differentiation	343	9.35718e-05	1	0.00351999	129.775	171	20	2.17643e-09	2.80824e-05	1.40412e-06	25.6919	59	920	chr10_118890977_118894180,chr10_118896012_118896776,chr10_119301464_119306659,chr10_8092775_8100761,chr11_2207455_2207660,chr11_2211039_2212133,chr11_2234043_2235450,chr11_2243060_2243685,chr11_2286788_2288051,chr11_2883529_2884460,chr11_31836334_31838674,chr11_78534072_78534297,chr11_78900687_78900896,chr11_78980839_78981869,chr13_107069935_107070047,chr13_110396942_110398293,chr13_110431612_110…	ALDH1A2,ATOH1,BAIAP2,BARHL2,C1QL1,CDKN1C,CNR1,COBL,EFNB2,EMX2,ENSG00000166503,EPHA7,FEZF1,FOXG1,FZD2,GATA3,GRB10,GRB7,HAND2,HDAC9,HOXD10,HOXD9,IRS2,IRX5,ISL1,KIAA1598,LMO4,LMX1A,MEF2C,NDEL1,NEUROD2,NEUROG2,NKX6-1,NOG,NPTX1,NR2E1,NTN1,OTP,PAX6,PITX2,POU3F2,POU4F1,PRDM1,PRKCA,RUNX3,SATB2,SFRP1,SKIL,SKOR1,SLC4A10,SOX1,STMN1,TBR1,TBX20,TENM4,TH,TLX3,UBB,VAX1
GO Molecular Function	GO:0000987	core promoter proximal region sequence-specific DNA binding	14	2.33078e-24	9.72402e-21	6.94573e-22	45.6705	126	14	5.30642e-09	2.21384e-05	1.58131e-06	10.3885	33	372	chr10_8092775_8100761,chr11_19366443_19366793,chr11_2207455_2207660,chr11_2211039_2212133,chr11_2234043_2235450,chr11_2243060_2243685,chr11_2286788_2288051,chr11_2292000_2293665,chr11_2294872_2295729,chr11_2308362_2309287,chr11_2314836_2315339,chr11_31836334_31838674,chr12_54367250_54367460,chr13_112061955_112062791,chr13_112074876_112074910,chr13_112212075_112212266,chr13_112507698_112508206,chr…	ASCL2,ATOH1,DLX4,E2F8,FEZF1,FOXJ1,GATA3,HOXA10,HOXB1,HOXC11,ISL1,MEF2C,NHLH2,NKX6-1,NRF1,PAX5,PAX6,PBX1,PDX1,PITX2,POU3F2,PRDM1,SATB2,SIX2,SKIL,SMAD1,SOX1,SOX21,SP2,T,TBX20,TFAP2A,ZIC1
GO Biological Process	GO:0035295	tube development	402	0.000240011	1	0.00770365	71.6902	102	22	3.35914e-09	4.33429e-05	1.97013e-06	15.2755	42	547	chr10_8092775_8100761,chr11_31836334_31838674,chr12_85671811_85674531,chr13_107069935_107070047,chr13_110768493_110768683,chr13_28491809_28494177,chr13_34250922_34251239,chr13_37495632_37495847,chr13_79168044_79168573,chr13_79169714_79171679,chr15_58357204_58358811,chr16_84860871_84860918,chr16_84918794_84918851,chr17_42705761_42706084,chr17_42705761_42706084,chr17_42705761_42706084,chr17_4530731…	ALDH1A2,ALX1,COBL,COL4A1,CRISPLD2,EDNRB,EFNB2,EPHA7,FOXJ1,FZD2,GATA3,GATA4,GNA13,HAND2,HOXA11,HOXD11,IRX2,ITGB3,LMO4,MEF2C,NKX2-6,NOG,NTN1,PAX6,PBX1,PDGFC,PDX1,PITX2,PKD2,PRDM1,SFRP1,SHOX2,SIM1,SIX2,SMAD1,SMAD9,SPRY1,STARD13,T,TBX20,TBX4,TWIST1
GO Biological Process	GO:0002009	morphogenesis of an epithelium	396	0.000221637	1	0.00722166	52.2937	79	24	3.81622e-09	4.92406e-05	2.05169e-06	11.338	35	406	chr10_8092775_8100761,chr12_85671811_85674531,chr13_107069935_107070047,chr13_110768493_110768683,chr13_28491809_28494177,chr13_34250922_34251239,chr15_58357204_58358811,chr17_42705761_42706084,chr17_42705761_42706084,chr17_42705761_42706084,chr17_46824292_46825371,chr17_46824292_46825371,chr17_46824292_46825371,chr17_46827113_46827626,chr17_46827113_46827626,chr17_46827113_46827626,chr17_4683224…	ALDH1A2,ALX1,COBL,COL4A1,CYR61,EFNB2,EPHA7,FZD2,GATA3,GATA4,GNA13,HAND2,HOXA11,HOXB13,HOXD11,IRX2,LMO4,MEF2C,NOG,NTN1,PBX1,PDX1,PITX2,PKD2,SFRP1,SIX2,SOCS3,SPRY1,STARD13,T,TBX20,TBX4,TFAP2A,TWIST1,VEGFC
GO Biological Process	GO:0000122	negative regulation of transcription from RNA polymerase II promoter	97	2.22544e-09	2.87149e-05	2.9603e-07	88.1466	145	23	3.77121e-09	4.86599e-05	2.11565e-06	22.1453	53	793	chr10_118890977_118894180,chr10_118896012_118896776,chr10_8092775_8100761,chr11_10750074_10750973,chr11_19366443_19366793,chr11_2029309_2029688,chr11_2036573_2037173,chr11_2207455_2207660,chr11_2211039_2212133,chr11_2234043_2235450,chr11_2243060_2243685,chr11_2286788_2288051,chr11_2292000_2293665,chr11_2294872_2295729,chr11_2308362_2309287,chr11_2314836_2315339,chr11_2883529_2884460,chr11_3183633…	ALX1,ASCL2,BACH2,CBX4,CBX8,CDKN1C,CTR9,DLX4,E2F8,EDNRB,FEZF1,FOXG1,FOXJ1,FOXO1,FOXO3,GATA3,HDAC9,HEXIM1,HOXB13,HOXD8,HOXD9,IGF2,IRX2,ISL1,LMO1,MEF2C,NKX6-1,NOG,NR2E1,PAX5,PAX6,PCBP3,PDX1,PIAS1,POU4F1,PRDM1,PRDM13,PRDM14,RUNX3,SATB2,SHOX2,SKIL,SMURF2,SP2,SUZ12,T,TBL1XR1,TBX18,TBX20,TFAP2A,TWIST1,UBB,VAX1
GO Molecular Function	GO:0000978	RNA polymerase II core promoter proximal region sequence-specific DNA binding	11	1.20183e-25	5.01404e-22	4.55822e-23	43.5328	125	15	8.10042e-09	3.3795e-05	2.253e-06	10.0254	32	359	chr11_19366443_19366793,chr11_2207455_2207660,chr11_2211039_2212133,chr11_2234043_2235450,chr11_2243060_2243685,chr11_2286788_2288051,chr11_2292000_2293665,chr11_2294872_2295729,chr11_2308362_2309287,chr11_2314836_2315339,chr11_31836334_31838674,chr12_54367250_54367460,chr13_112061955_112062791,chr13_112074876_112074910,chr13_112212075_112212266,chr13_112507698_112508206,chr13_112555823_112555987…	ASCL2,ATOH1,DLX4,E2F8,FEZF1,FOXJ1,HOXA10,HOXB1,HOXC11,ISL1,MEF2C,NHLH2,NKX6-1,NRF1,PAX5,PAX6,PBX1,PDX1,PITX2,POU3F2,PRDM1,SATB2,SIX2,SKIL,SMAD1,SOX1,SOX21,SP2,T,TBX20,TFAP2A,ZIC1
GO Biological Process	GO:0048870	cell motility	161	2.60236e-07	0.00335782	2.0856e-05	96.1291	146	27	1.94294e-08	0.000250697	9.28509e-06	25.2451	56	904	chr10_118890977_118894180,chr10_118896012_118896776,chr10_119301464_119306659,chr10_128993115_128993810,chr10_8092775_8100761,chr11_111809582_111810533,chr11_111845646_111846087,chr11_111847475_111848638,chr11_12620869_12621248,chr11_31836334_31838674,chr12_85671811_85674531,chr13_100085073_100085455,chr13_107069935_107070047,chr13_112061955_112062791,chr13_112074876_112074910,chr13_112212075_112…	ALX1,ATOH1,BARHL2,CCL8,CCR7,COL1A1,CYR61,DIXDC1,DOCK1,EDNRB,EFNB2,EMX2,ENPEP,FEZF1,FOXG1,FOXJ1,GAS6,GATA3,GPC6,GPR183,GRB7,HAND2,HOXB9,ISL1,ITGB3,KIAA1598,MCOLN2,MEF2C,MYO18A,NDEL1,NKX6-1,NR2E1,NTN1,PARVA,PAX6,PITX2,PKN2,PODXL2,POU3F2,POU4F1,SATB2,SIX2,SIX3,SLC7A11,SOX1,STARD13,STAT5B,T,TBX20,TEKT3,TGFBR3,TLX3,TWIST1,VAX1,VEGFC,WASF2
GO Biological Process	GO:0048705	skeletal system morphogenesis	140	9.6502e-08	0.00124516	8.89404e-06	25.738	56	29	2.28495e-08	0.000294828	1.01665e-05	5.83654	23	209	chr12_54367250_54367460,chr12_85671811_85674531,chr16_54971007_54973966,chr17_46522464_46522513,chr17_46522464_46522513,chr17_46522464_46522513,chr17_46534400_46534794,chr17_46534400_46534794,chr17_46534400_46534794,chr17_46570458_46570504,chr17_46570458_46570504,chr17_46570458_46570504,chr17_46604235_46604774,chr17_46604235_46604774,chr17_46604235_46604774,chr17_48258561_48259448,chr17_48258561_…	ALX1,AXIN2,COL1A1,HOXA11,HOXB1,HOXC11,HOXD10,HOXD8,HOXD9,IRX5,MEF2C,NOG,PAX5,SATB2,SFRP1,SHOX2,SIX2,STC1,T,TBX4,TFAP2A,TIPARP,TWIST1
GO Biological Process	GO:0045165	cell fate commitment	39	5.08639e-12	6.56297e-08	1.68281e-09	36.168	83	28	2.27009e-08	0.000292909	1.0461e-05	6.31128	24	226	chr10_8092775_8100761,chr11_10750074_10750973,chr11_31836334_31838674,chr11_78534072_78534297,chr11_78900687_78900896,chr11_78980839_78981869,chr13_112061955_112062791,chr13_112074876_112074910,chr13_112212075_112212266,chr13_112507698_112508206,chr13_112555823_112555987,chr13_112575212_112575735,chr13_112628189_112628792,chr13_112630296_112631672,chr13_112632730_112633175,chr13_112720171_1127214…	ATOH1,BARHL2,CTR9,FOXG1,GATA3,HOXA11,HOXD10,ISL1,MEF2C,NKX6-1,NR2E1,PAX6,POU3F2,POU4F1,PRDM1,PRDM14,SATB2,SFRP1,SIX2,SMAD1,SOX1,TBR1,TENM4,TLX3
GO Biological Process	GO:0060322	head development	185	8.2853e-07	0.0106905	5.77866e-05	93.0934	140	33	4.25991e-08	0.000549656	1.66562e-05	19.8554	47	711	chr10_118890977_118894180,chr10_118896012_118896776,chr10_119301464_119306659,chr11_111809582_111810533,chr11_111845646_111846087,chr11_111847475_111848638,chr11_122850140_122851122,chr11_2207455_2207660,chr11_2211039_2212133,chr11_2234043_2235450,chr11_2243060_2243685,chr11_2286788_2288051,chr11_31836334_31838674,chr13_100630170_100632250,chr13_100640914_100644657,chr13_100649131_100650387,chr13…	ALDH1A2,ATOH1,BAIAP2,C11orf63,CDK5RAP3,COL1A1,COL4A1,CRISPLD2,DCT,DIXDC1,EMX2,EPHA7,FEZF1,FOXG1,FOXJ1,FOXO3,HOXB1,IRS2,ISL1,LMX1A,NDEL1,NEUROD2,NKX2-6,NOG,NR2E1,OTP,PAX5,PAX6,PITX2,POU3F2,POU4F1,PTPRG,SATB2,SIX3,SLC4A10,SLC7A11,SMAD1,SMAD9,SOX1,STMN1,SYNGR3,TBR1,TH,TIPARP,VAX1,ZIC1,ZIC2
GO Biological Process	GO:0048704	embryonic skeletal system morphogenesis	124	4.48481e-08	0.000578675	4.66674e-06	12.6463	36	32	4.22154e-08	0.000544705	1.7022e-05	2.59712	15	93	chr12_54367250_54367460,chr12_85671811_85674531,chr16_54971007_54973966,chr17_46522464_46522513,chr17_46522464_46522513,chr17_46522464_46522513,chr17_46534400_46534794,chr17_46534400_46534794,chr17_46534400_46534794,chr17_46570458_46570504,chr17_46570458_46570504,chr17_46570458_46570504,chr17_46604235_46604774,chr17_46604235_46604774,chr17_46604235_46604774,chr17_54655317_54655325,chr17_54655317_…	ALX1,HOXA11,HOXB1,HOXC11,HOXD10,HOXD9,IRX5,MEF2C,NOG,PAX5,SATB2,SHOX2,SIX2,TFAP2A,TWIST1
GO Biological Process	GO:0001708	cell fate specification	14	2.03623e-17	2.62735e-13	1.87668e-14	13.3414	54	35	8.50959e-08	0.00109799	3.13712e-05	2.01067	13	72	chr11_31836334_31838674,chr11_78534072_78534297,chr11_78900687_78900896,chr11_78980839_78981869,chr13_112061955_112062791,chr13_112074876_112074910,chr13_112212075_112212266,chr13_112507698_112508206,chr13_112555823_112555987,chr13_112575212_112575735,chr13_112628189_112628792,chr13_112630296_112631672,chr13_112632730_112633175,chr13_112720171_112721425,chr13_112722719_112724583,chr13_112725605_1…	ATOH1,HOXA11,HOXD10,ISL1,NKX6-1,PAX6,POU3F2,POU4F1,PRDM14,SIX2,SOX1,TENM4,TLX3
GO Biological Process	GO:0030326	embryonic limb morphogenesis	284	2.89218e-05	0.373178	0.00131401	19.6525	40	36	9.20683e-08	0.00118796	3.29988e-05	3.54661	17	127	chr12_54367250_54367460,chr12_85671811_85674531,chr15_58357204_58358811,chr17_54655317_54655325,chr17_54655317_54655325,chr17_54655317_54655325,chr17_59494040_59494444,chr17_59494040_59494444,chr17_59494040_59494444,chr17_59520986_59521422,chr17_59520986_59521422,chr17_59520986_59521422,chr17_59564657_59564954,chr17_59564657_59564954,chr17_59564657_59564954,chr1_165322784_165327005,chr2_175192013…	ALDH1A2,ALX1,HAND2,HOXA10,HOXA11,HOXC11,HOXD10,HOXD9,NOG,PBX1,PITX2,SHOX2,SP8,SP9,TBX4,TFAP2A,TWIST1
GO Biological Process	GO:0022603	regulation of anatomical structure morphogenesis	377	0.00016365	1	0.00560101	107.222	144	37	1.37643e-07	0.00177601	4.80002e-05	26.7531	56	958	chr10_118890977_118894180,chr10_118896012_118896776,chr10_128993115_128993810,chr10_8092775_8100761,chr11_12620869_12621248,chr11_78534072_78534297,chr11_78900687_78900896,chr11_78980839_78981869,chr12_54367250_54367460,chr13_107069935_107070047,chr13_111718937_111719172,chr13_111747937_111748083,chr13_34250922_34251239,chr13_37679951_37681255,chr13_93877559_93877835,chr13_98273396_98274012,chr17…	ARHGDIA,ARHGEF7,BAIAP2,BARHL2,CDC7,CSNK1A1L,CSNK1D,DOCK1,EFNB2,EPHA7,F3,FBXW7,FGA,FGG,FOXJ1,FZD2,GATA3,GATA4,GNA13,GPC6,HAND2,HDAC9,HOXA11,HOXC11,HSPB1,ISL1,KIAA1598,LPAR3,MEF2C,NDEL1,NKX6-1,NOG,NR2E1,NTN1,PARVA,POU3F2,PRKCA,RAP2A,RNF207,SFRP1,SHOX2,SIX2,SKIL,SMURF2,SP6,SPRY1,SRCIN1,STARD13,TBR1,TBX18,TENM4,TFAP2A,TWIST1,UBB,UTS2R,VEGFC
GO Biological Process	GO:0007420	brain development	201	1.83623e-06	0.0236929	0.000117875	89.4653	134	40	1.53915e-07	0.00198597	4.96492e-05	18.7663	44	672	chr10_118890977_118894180,chr10_118896012_118896776,chr10_119301464_119306659,chr11_111809582_111810533,chr11_111845646_111846087,chr11_111847475_111848638,chr11_122850140_122851122,chr11_2207455_2207660,chr11_2211039_2212133,chr11_2234043_2235450,chr11_2243060_2243685,chr11_2286788_2288051,chr11_31836334_31838674,chr13_100630170_100632250,chr13_100640914_100644657,chr13_100649131_100650387,chr13…	ALDH1A2,ATOH1,BAIAP2,C11orf63,CDK5RAP3,COL4A1,DCT,DIXDC1,EMX2,EPHA7,FEZF1,FOXG1,FOXJ1,FOXO3,HOXB1,IRS2,ISL1,LMX1A,NDEL1,NEUROD2,NKX2-6,NOG,NR2E1,OTP,PAX5,PAX6,PITX2,POU3F2,POU4F1,PTPRG,SATB2,SIX3,SLC4A10,SLC7A11,SMAD1,SMAD9,SOX1,STMN1,SYNGR3,TBR1,TH,VAX1,ZIC1,ZIC2
GO Biological Process	GO:0048665	neuron fate specification	3	8.7761e-25	1.13238e-20	3.7746e-21	6.61644	47	44	2.04489e-07	0.00263852	5.99664e-05	0.921559	9	33	chr11_31836334_31838674,chr13_112061955_112062791,chr13_112074876_112074910,chr13_112212075_112212266,chr13_112507698_112508206,chr13_112555823_112555987,chr13_112575212_112575735,chr13_112628189_112628792,chr13_112630296_112631672,chr13_112632730_112633175,chr13_112720171_112721425,chr13_112722719_112724583,chr13_112725605_112727160,chr13_112728349_112728964,chr13_112785388_112786727,chr13_11278…	ATOH1,HOXD10,ISL1,NKX6-1,PAX6,POU3F2,POU4F1,SOX1,TLX3
GO Biological Process	GO:0048663	neuron fate commitment	13	4.86639e-18	6.27911e-14	4.83008e-15	11.9846	52	45	3.47914e-07	0.00448913	9.97585e-05	1.89897	12	68	chr11_31836334_31838674,chr13_112061955_112062791,chr13_112074876_112074910,chr13_112212075_112212266,chr13_112507698_112508206,chr13_112555823_112555987,chr13_112575212_112575735,chr13_112628189_112628792,chr13_112630296_112631672,chr13_112632730_112633175,chr13_112720171_112721425,chr13_112722719_112724583,chr13_112725605_112727160,chr13_112728349_112728964,chr13_112785388_112786727,chr13_11278…	ATOH1,FOXG1,HOXD10,ISL1,NKX6-1,PAX6,POU3F2,POU4F1,SATB2,SOX1,TBR1,TLX3
GO Biological Process	GO:0048646	anatomical structure formation involved in morphogenesis	378	0.000164183	1	0.00560438	94.1001	129	46	4.64938e-07	0.0059991	0.000130415	22.8993	49	820	chr10_8092775_8100761,chr11_10750074_10750973,chr11_12620869_12621248,chr11_19366443_19366793,chr11_31836334_31838674,chr11_78534072_78534297,chr11_78900687_78900896,chr11_78980839_78981869,chr12_85671811_85674531,chr13_107069935_107070047,chr13_110768493_110768683,chr13_40746370_40747228,chr13_41055185_41056288,chr13_41111493_41111800,chr13_41240923_41241867,chr17_42705761_42706084,chr17_4270576…	ACTG1,ALX1,AXIN2,CASQ2,COBL,COL1A1,COL4A1,COL6A1,CTR9,CYR61,E2F8,EFNB2,ENPEP,FOXO1,FZD2,GATA3,GNA13,HAND2,HOXA11,HOXB1,HOXB13,IRX2,ISL1,ITGB3,LMO4,MEF2C,NOG,NR2E1,PARVA,PAX6,PITX2,PRDM14,PRKCA,SFRP1,SIX2,SKIL,SMAD1,T,TBR1,TBX20,TBX4,TENM4,TFAP2A,TGFBR3,TLR2,TWIST1,VEGFC,VEZF1,WASF2
GO Biological Process	GO:0048935	peripheral nervous system neuron development	323	7.00736e-05	0.904159	0.00279925	3.00775	12	47	6.69254e-07	0.00863539	0.000183732	0.363038	6	13	chr13_79168044_79168573,chr13_79169714_79171679,chr13_79181021_79184529,chr1_25349006_25349681,chr2_176968052_176970064,chr2_176971304_176971355,chr2_176985953_176989586,chr4_174427146_174428191,chr4_174427146_174428191,chr4_174439990_174440681,chr4_174439990_174440681,chr5_50677808_50679817	HAND2,HOXD10,HOXD9,ISL1,POU4F1,RUNX3
GO Biological Process	GO:0048666	neuron development	400	0.000238174	1	0.00768291	102.851	138	50	8.73071e-07	0.0112652	0.000225305	20.6653	45	740	chr10_118890977_118894180,chr10_118896012_118896776,chr10_8092775_8100761,chr11_2207455_2207660,chr11_2211039_2212133,chr11_2234043_2235450,chr11_2243060_2243685,chr11_2286788_2288051,chr11_2883529_2884460,chr11_31836334_31838674,chr11_78534072_78534297,chr11_78900687_78900896,chr11_78980839_78981869,chr13_107069935_107070047,chr13_110396942_110398293,chr13_110431612_110432220,chr13_110433636_110…	ATOH1,BAIAP2,C1QL1,CDKN1C,CNR1,COBL,EFNB2,ENSG00000166503,EPHA7,FEZF1,FOXG1,FZD2,GATA3,GRB10,GRB7,HAND2,HOXD10,HOXD9,IRS2,IRX5,ISL1,KIAA1598,LMX1A,MEF2C,NDEL1,NEUROD2,NOG,NPTX1,NR2E1,NTN1,PAX6,POU3F2,POU4F1,PRDM1,PRKCA,RUNX3,SKIL,SKOR1,SLC4A10,SOX1,STMN1,TENM4,TH,UBB,VAX1
GO Biological Process	GO:0001657	ureteric bud development	405	0.000254088	1	0.00809507	15.3588	31	56	4.08737e-06	0.0527393	0.000941773	2.37371	12	85	chr10_8092775_8100761,chr13_37495632_37495847,chr17_54655317_54655325,chr17_54655317_54655325,chr17_54655317_54655325,chr17_74128448_74128731,chr17_74128448_74128731,chr17_74128448_74128731,chr1_165322784_165327005,chr2_176968052_176970064,chr2_176971304_176971355,chr4_124468530_124468840,chr4_124468530_124468840,chr4_146117505_146118165,chr4_146117505_146118165,chr4_88928251_88928541,chr6_100581…	FOXJ1,GATA3,HOXA11,HOXD11,NOG,PBX1,PKD2,SFRP1,SIM1,SMAD1,SMAD9,SPRY1
GO Biological Process	GO:0072164	mesonephric tubule development	412	0.000261911	1	0.00820252	15.3866	31	57	4.63158e-06	0.0597613	0.00104844	2.40164	12	86	chr10_8092775_8100761,chr13_37495632_37495847,chr17_54655317_54655325,chr17_54655317_54655325,chr17_54655317_54655325,chr17_74128448_74128731,chr17_74128448_74128731,chr17_74128448_74128731,chr1_165322784_165327005,chr2_176968052_176970064,chr2_176971304_176971355,chr4_124468530_124468840,chr4_124468530_124468840,chr4_146117505_146118165,chr4_146117505_146118165,chr4_88928251_88928541,chr6_100581…	FOXJ1,GATA3,HOXA11,HOXD11,NOG,PBX1,PKD2,SFRP1,SIM1,SMAD1,SMAD9,SPRY1
GO Biological Process	GO:0007596	blood coagulation	154	2.02347e-07	0.00261088	1.69538e-05	22.978	51	59	4.88813e-06	0.0630715	0.00106901	8.46159	24	303	chr10_128993115_128993810,chr10_8092775_8100761,chr11_5265008_5265215,chr13_113804978_113805721,chr13_113807384_113807930,chr13_114742928_114743606,chr17_45307312_45307606,chr17_45307312_45307606,chr17_45307312_45307606,chr17_48258561_48259448,chr17_48258561_48259448,chr17_48258561_48259448,chr17_55213563_55213656,chr17_55213563_55213656,chr17_55213563_55213656,chr17_63053202_63053996,chr17_63053…	ACTG1,AKAP1,ANXA5,COL1A1,DOCK1,F10,F3,FGA,FGG,GAS6,GATA3,GATA4,GNA13,HBB,HBD,HBG1,HSPB1,ITGB3,PAFAH2,PDGFC,PIK3R5,PRKCA,PROZ,SLC7A11
GO Biological Process	GO:0003231	cardiac ventricle development	262	1.56031e-05	0.201327	0.000768423	19.1066	40	58	4.8606e-06	0.0627163	0.00108132	3.26735	14	117	chr10_8092775_8100761,chr13_79168044_79168573,chr13_79169714_79171679,chr13_79181021_79184529,chr17_42705761_42706084,chr17_42705761_42706084,chr17_42705761_42706084,chr17_54655317_54655325,chr17_54655317_54655325,chr17_54655317_54655325,chr1_86081443_86082316,chr1_86081443_86082316,chr1_87793364_87793510,chr1_87793364_87793510,chr1_92011732_92012736,chr1_92011732_92012736,chr4_111541339_11154340…	CYR61,FZD2,GATA3,GATA4,HAND2,ISL1,LMO4,MEF2C,NOG,PITX2,POU4F1,PRDM1,TBX20,TGFBR3
GO Biological Process	GO:0050817	coagulation	155	2.08631e-07	0.00269197	1.73675e-05	23.0019	51	60	5.46974e-06	0.0705761	0.00117627	8.51744	24	305	chr10_128993115_128993810,chr10_8092775_8100761,chr11_5265008_5265215,chr13_113804978_113805721,chr13_113807384_113807930,chr13_114742928_114743606,chr17_45307312_45307606,chr17_45307312_45307606,chr17_45307312_45307606,chr17_48258561_48259448,chr17_48258561_48259448,chr17_48258561_48259448,chr17_55213563_55213656,chr17_55213563_55213656,chr17_55213563_55213656,chr17_63053202_63053996,chr17_63053…	ACTG1,AKAP1,ANXA5,COL1A1,DOCK1,F10,F3,FGA,FGG,GAS6,GATA3,GATA4,GNA13,HBB,HBD,HBG1,HSPB1,ITGB3,PAFAH2,PDGFC,PIK3R5,PRKCA,PROZ,SLC7A11
GO Biological Process	GO:0090596	sensory organ morphogenesis	89	1.06839e-09	1.37855e-05	1.54893e-07	36.313	77	62	6.05195e-06	0.0780883	0.00125949	6.8698	21	246	chr10_8092775_8100761,chr11_2207455_2207660,chr11_2211039_2212133,chr11_2234043_2235450,chr11_2243060_2243685,chr11_2286788_2288051,chr11_31836334_31838674,chr13_112061955_112062791,chr13_112074876_112074910,chr13_112212075_112212266,chr13_112507698_112508206,chr13_112555823_112555987,chr13_112575212_112575735,chr13_112628189_112628792,chr13_112630296_112631672,chr13_112632730_112633175,chr13_112…	ATOH1,FOXE3,FOXG1,FZD2,GATA3,IRX5,KRT13,MYO15A,NOG,NTN1,PAX6,PITX2,PRDM1,SIX2,SIX3,SOBP,SOX1,TFAP2A,TH,TWIST1,ZIC1
GO Biological Process	GO:0007599	hemostasis	160	2.58551e-07	0.00333609	2.08506e-05	23.1703	51	63	6.46098e-06	0.0833661	0.00132327	8.60122	24	308	chr10_128993115_128993810,chr10_8092775_8100761,chr11_5265008_5265215,chr13_113804978_113805721,chr13_113807384_113807930,chr13_114742928_114743606,chr17_45307312_45307606,chr17_45307312_45307606,chr17_45307312_45307606,chr17_48258561_48259448,chr17_48258561_48259448,chr17_48258561_48259448,chr17_55213563_55213656,chr17_55213563_55213656,chr17_55213563_55213656,chr17_63053202_63053996,chr17_63053…	ACTG1,AKAP1,ANXA5,COL1A1,DOCK1,F10,F3,FGA,FGG,GAS6,GATA3,GATA4,GNA13,HBB,HBD,HBG1,HSPB1,ITGB3,PAFAH2,PDGFC,PIK3R5,PRKCA,PROZ,SLC7A11
GO Biological Process	GO:0003205	cardiac chamber development	438	0.000346663	1	0.0102123	24.4292	43	65	6.6784e-06	0.0861714	0.00132571	4.30061	16	154	chr10_8092775_8100761,chr11_12620869_12621248,chr13_79168044_79168573,chr13_79169714_79171679,chr13_79181021_79184529,chr17_42705761_42706084,chr17_42705761_42706084,chr17_42705761_42706084,chr17_54655317_54655325,chr17_54655317_54655325,chr17_54655317_54655325,chr1_86081443_86082316,chr1_86081443_86082316,chr1_87793364_87793510,chr1_87793364_87793510,chr1_92011732_92012736,chr1_92011732_92012736…	CYR61,FZD2,GATA3,GATA4,HAND2,ISL1,LMO4,MEF2C,NOG,PARVA,PITX2,POU4F1,PRDM1,SHOX2,TBX20,TGFBR3
GO Biological Process	GO:0035270	endocrine system development	179	6.47064e-07	0.00834907	4.66428e-05	17.9479	42	66	7.2265e-06	0.0932435	0.00141278	3.37905	14	121	chr10_8092775_8100761,chr11_2883529_2884460,chr11_31836334_31838674,chr13_28491809_28494177,chr13_40746370_40747228,chr13_41055185_41056288,chr13_41111493_41111800,chr13_41240923_41241867,chr15_58357204_58358811,chr17_54655317_54655325,chr17_54655317_54655325,chr17_54655317_54655325,chr1_165322784_165327005,chr2_45028225_45030384,chr2_45175881_45180560,chr2_45227645_45229649,chr4_111541339_111543…	ALDH1A2,CDKN1C,FOXO1,GATA3,ISL1,NKX6-1,NOG,OTP,PAX6,PBX1,PDX1,PITX2,POU3F2,SIX3
GO Biological Process	GO:0001823	mesonephros development	454	0.000437659	1	0.0124386	15.8727	31	68	7.49888e-06	0.096758	0.00142291	2.51334	12	90	chr10_8092775_8100761,chr13_37495632_37495847,chr17_54655317_54655325,chr17_54655317_54655325,chr17_54655317_54655325,chr17_74128448_74128731,chr17_74128448_74128731,chr17_74128448_74128731,chr1_165322784_165327005,chr2_176968052_176970064,chr2_176971304_176971355,chr4_124468530_124468840,chr4_124468530_124468840,chr4_146117505_146118165,chr4_146117505_146118165,chr4_88928251_88928541,chr6_100581…	FOXJ1,GATA3,HOXA11,HOXD11,NOG,PBX1,PKD2,SFRP1,SIM1,SMAD1,SMAD9,SPRY1
GO Biological Process	GO:0007423	sensory organ development	467	0.00054719	1	0.0151186	65.7387	93	69	7.97636e-06	0.102919	0.00149158	14.2981	33	512	chr10_118890977_118894180,chr10_118896012_118896776,chr10_8092775_8100761,chr11_2207455_2207660,chr11_2211039_2212133,chr11_2234043_2235450,chr11_2243060_2243685,chr11_2286788_2288051,chr11_2883529_2884460,chr11_31836334_31838674,chr11_8038043_8038083,chr13_110768493_110768683,chr13_112061955_112062791,chr13_112074876_112074910,chr13_112212075_112212266,chr13_112507698_112508206,chr13_112555823_1…	ALDH1A2,ATG5,ATOH1,CDKN1C,COL4A1,FOXE3,FOXG1,FZD2,GATA3,HAND2,IRX5,KCNQ1,KRT13,MYO15A,NKX2-6,NOG,NR2E1,NTN1,PAX6,PITX2,PRDM1,SIX2,SIX3,SKIL,SLC7A11,SOBP,SOX1,TFAP2A,TH,TUB,TWIST1,VAX1,ZIC1
GO Molecular Function	GO:0001227	transcriptional repressor activity, RNA polymerase II transcription regulatory region sequence-specific binding	29	3.25163e-11	1.35658e-07	4.67786e-09	29.6785	71	16	5.86369e-06	0.0244633	0.00152896	6.31128	20	226	chr10_118890977_118894180,chr10_118896012_118896776,chr10_8092775_8100761,chr11_19366443_19366793,chr11_2207455_2207660,chr11_2211039_2212133,chr11_2234043_2235450,chr11_2243060_2243685,chr11_2286788_2288051,chr11_2292000_2293665,chr11_2294872_2295729,chr11_2308362_2309287,chr11_2314836_2315339,chr11_31836334_31838674,chr13_40746370_40747228,chr13_41055185_41056288,chr13_41111493_41111800,chr13_4…	ASCL2,BACH2,DLX4,E2F8,FEZF1,FOXO1,FOXO3,GATA3,HOXB13,HOXD9,IRX2,NKX6-1,NR2E1,PAX6,PCBP3,PRDM1,SKIL,SP2,TFAP2A,VAX1
GO Biological Process	GO:1902692	regulation of neuroblast proliferation	399	0.000237339	1	0.00767516	4.49549	14	70	9.04531e-06	0.116712	0.00166731	0.781929	7	28	chr10_118890977_118894180,chr10_118896012_118896776,chr11_31836334_31838674,chr13_95086146_95086158,chr14_29234671_29236535,chr2_45028225_45030384,chr2_45175881_45180560,chr2_45227645_45229649,chr4_177714350_177715040,chr4_177714350_177715040,chr5_76923737_76926341,chr5_76928406_76929064,chr5_76932016_76932526,chr5_76934327_76937980	DCT,FOXG1,OTP,PAX6,SIX3,VAX1,VEGFC
GO Biological Process	GO:0070527	platelet aggregation	18	2.80457e-15	3.61874e-11	2.01041e-12	2.73491	24	73	1.22625e-05	0.158222	0.00216743	1.11704	8	40	chr11_5265008_5265215,chr13_114742928_114743606,chr17_45307312_45307606,chr17_45307312_45307606,chr17_45307312_45307606,chr17_79315269_79316841,chr17_79315269_79316841,chr17_79315269_79316841,chr17_79320473_79320652,chr17_79320473_79320652,chr17_79320473_79320652,chr17_79359767_79360456,chr17_79359767_79360456,chr17_79359767_79360456,chr17_79361553_79361742,chr17_79361553_79361742,chr17_79361553_…	ACTG1,FGA,FGG,GAS6,HBB,HSPB1,ITGB3,SLC7A11
GO Biological Process	GO:0003170	heart valve development	170	4.35559e-07	0.00562001	3.30589e-05	7.63491	25	75	1.48661e-05	0.191817	0.00255756	1.14497	8	41	chr10_8092775_8100761,chr1_86081443_86082316,chr1_86081443_86082316,chr3_157812018_157813810,chr3_157823363_157825196,chr4_111541339_111543401,chr4_111545062_111545628,chr4_111549880_111552353,chr4_111554385_111555102,chr4_111558157_111559355,chr4_111560494_111563111,chr5_87955366_87955859,chr5_87967728_87969886,chr6_106433444_106434623,chr6_106433444_106434623,chr6_106433444_106434623,chr6_10644…	CYR61,GATA3,MEF2C,PITX2,PRDM1,SHOX2,TBX20,TWIST1
GO Biological Process	GO:0050878	regulation of body fluid levels	139	8.74126e-08	0.00112788	8.11427e-06	41.8558	79	76	1.53911e-05	0.198592	0.00261305	14.1027	32	505	chr10_119301464_119306659,chr10_128993115_128993810,chr10_8092775_8100761,chr11_122850140_122851122,chr11_5265008_5265215,chr13_113804978_113805721,chr13_113807384_113807930,chr13_114742928_114743606,chr13_79168044_79168573,chr13_79169714_79171679,chr17_40428759_40429406,chr17_40428759_40429406,chr17_40428759_40429406,chr17_45307312_45307606,chr17_45307312_45307606,chr17_45307312_45307606,chr17_4…	ACTG1,AKAP1,ANXA5,ATG5,C11orf63,COL1A1,DOCK1,EDNRB,F10,F3,FGA,FGG,GAS6,GATA3,GATA4,GNA13,HBB,HBD,HBG1,HSPB1,ITGB3,PAFAH2,PDGFC,PIK3R5,PRKCA,PROZ,RAB11FIP2,SLC7A11,STAT5B,STMN1,TAC4,UTS2R
GO Biological Process	GO:0021953	central nervous system neuron differentiation	480	0.000643372	1	0.0172946	30.6364	50	77	1.60679e-05	0.207324	0.00269252	4.6078	16	165	chr11_31836334_31838674,chr13_112061955_112062791,chr13_112074876_112074910,chr13_112212075_112212266,chr13_112507698_112508206,chr13_112555823_112555987,chr13_112575212_112575735,chr13_112628189_112628792,chr13_112630296_112631672,chr13_112632730_112633175,chr13_112720171_112721425,chr13_112722719_112724583,chr13_112725605_112727160,chr13_112728349_112728964,chr13_112785388_112786727,chr13_11278…	FOXG1,HOXD10,ISL1,LMO4,LMX1A,NDEL1,NKX6-1,NR2E1,OTP,PAX6,POU4F1,SATB2,SLC4A10,SOX1,TBR1,TBX20
GO Biological Process	GO:0003209	cardiac atrium morphogenesis	292	4.31258e-05	0.556452	0.00190566	4.82757	16	80	1.86809e-05	0.241039	0.00301299	0.865707	7	31	chr17_54655317_54655325,chr17_54655317_54655325,chr17_54655317_54655325,chr1_86081443_86082316,chr1_86081443_86082316,chr3_157812018_157813810,chr3_157823363_157825196,chr4_111541339_111543401,chr4_111545062_111545628,chr4_111549880_111552353,chr4_111554385_111555102,chr4_111558157_111559355,chr4_111560494_111563111,chr5_50677808_50679817,chr7_35292896_35293892,chr8_11560299_11562685	CYR61,GATA4,ISL1,NOG,PITX2,SHOX2,TBX20
GO Biological Process	GO:0021983	pituitary gland development	85	7.62518e-10	9.83877e-06	1.1575e-07	8.22444	31	85	2.1482e-05	0.277183	0.00326098	1.20082	8	43	chr11_31836334_31838674,chr15_58357204_58358811,chr17_54655317_54655325,chr17_54655317_54655325,chr17_54655317_54655325,chr2_45028225_45030384,chr2_45175881_45180560,chr2_45227645_45229649,chr4_111541339_111543401,chr4_111545062_111545628,chr4_111549880_111552353,chr4_111554385_111555102,chr4_111558157_111559355,chr4_111560494_111563111,chr5_50677808_50679817,chr5_76923737_76926341,chr5_76928406_…	ALDH1A2,ISL1,NOG,OTP,PAX6,PITX2,POU3F2,SIX3
GO Biological Process	GO:0048732	gland development	489	0.000731838	1	0.0193106	50.3133	74	86	2.18847e-05	0.282378	0.00328347	11.1146	27	398	chr10_8092775_8100761,chr11_122850140_122851122,chr11_19366443_19366793,chr11_2883529_2884460,chr11_31836334_31838674,chr13_110396942_110398293,chr13_110431612_110432220,chr13_110433636_110434682,chr13_110436111_110438288,chr13_110768493_110768683,chr13_28491809_28494177,chr15_58357204_58358811,chr17_40428759_40429406,chr17_40428759_40429406,chr17_40428759_40429406,chr17_46795860_46797764,chr17_4…	ALDH1A2,BSX,CDKN1C,COBL,E2F8,GATA3,HAND2,HOXB13,HOXB9,HOXD9,IRS2,ISL1,LMO4,NOG,NTN1,OTP,PAX6,PBX1,PDX1,PITX2,PKD2,POU3F2,RPS6KA1,SFRP1,SIX3,STAT5B,TGFBR3
GO Biological Process	GO:0009953	dorsal/ventral pattern formation	88	9.34237e-10	1.20545e-05	1.36982e-07	12.4398	39	88	2.39067e-05	0.308468	0.00350532	2.37371	11	85	chr11_31836334_31838674,chr13_112061955_112062791,chr13_112074876_112074910,chr13_112212075_112212266,chr13_112507698_112508206,chr13_112555823_112555987,chr13_112575212_112575735,chr13_112628189_112628792,chr13_112630296_112631672,chr13_112632730_112633175,chr13_112720171_112721425,chr13_112722719_112724583,chr13_112725605_112727160,chr13_112728349_112728964,chr13_112785388_112786727,chr13_11278…	FOXG1,HOXA11,HOXD11,NKX6-1,NOG,PAX6,SFRP1,SIX3,SOX1,SP8,TBX20
GO Biological Process	GO:0030900	forebrain development	395	0.000217216	1	0.00709554	55.5555	83	91	3.4264e-05	0.442108	0.00485833	10.1372	25	363	chr10_119301464_119306659,chr11_111809582_111810533,chr11_111845646_111846087,chr11_111847475_111848638,chr11_2207455_2207660,chr11_2211039_2212133,chr11_2234043_2235450,chr11_2243060_2243685,chr11_2286788_2288051,chr11_31836334_31838674,chr13_112061955_112062791,chr13_112074876_112074910,chr13_112212075_112212266,chr13_112507698_112508206,chr13_112555823_112555987,chr13_112575212_112575735,chr13…	ALDH1A2,ATOH1,DCT,DIXDC1,EMX2,FEZF1,FOXG1,ISL1,LMX1A,NDEL1,NKX2-6,NOG,NR2E1,OTP,PAX5,PAX6,PITX2,POU3F2,POU4F1,SATB2,SIX3,SLC4A10,SOX1,TBR1,TH
GO Biological Process	GO:0010769	regulation of cell morphogenesis involved in differentiation	449	0.000405142	1	0.0116426	35.4859	57	94	3.84031e-05	0.495515	0.00527144	7.17699	20	257	chr10_118890977_118894180,chr10_118896012_118896776,chr10_128993115_128993810,chr13_111718937_111719172,chr13_111747937_111748083,chr13_98273396_98274012,chr17_36763598_36764185,chr17_36763598_36764185,chr17_36763598_36764185,chr17_78999347_79001543,chr17_78999347_79001543,chr17_78999347_79001543,chr17_79829883_79830196,chr17_79829883_79830196,chr17_79829883_79830196,chr17_8311594_8311836,chr17_8…	ARHGDIA,ARHGEF7,BAIAP2,BARHL2,DOCK1,EPHA7,FGA,FGG,KIAA1598,LPAR3,NDEL1,NKX6-1,NR2E1,NTN1,POU3F2,RAP2A,SHOX2,SKIL,SRCIN1,TBR1
GO Biological Process	GO:0009611	response to wounding	369	0.000136445	1	0.00477112	49.0284	76	95	3.92186e-05	0.506037	0.00532671	15.471	33	554	chr10_128993115_128993810,chr10_8092775_8100761,chr11_31836334_31838674,chr11_5265008_5265215,chr11_61283307_61284417,chr11_61302112_61302466,chr11_61309985_61310204,chr11_61314117_61314936,chr11_61322107_61323667,chr13_113804978_113805721,chr13_113807384_113807930,chr13_114742928_114743606,chr13_28491809_28494177,chr17_45307312_45307606,chr17_45307312_45307606,chr17_45307312_45307606,chr17_46824…	ACTG1,AKAP1,ANXA5,COL1A1,CYR61,DOCK1,F10,F3,FGA,FGG,GAS6,GATA3,GATA4,GNA13,HBB,HBD,HBG1,HOXB13,HSPB1,ISL1,ITGB3,NOG,PAFAH2,PAX6,PDGFC,PDX1,PIK3R5,PRKCA,PROZ,SGCA,SLC7A11,SYT7,ZFP36L2
GO Biological Process	GO:0003230	cardiac atrium development	372	0.00013852	1	0.00480464	5.34899	16	98	4.33681e-05	0.559578	0.00570998	0.977411	7	35	chr17_54655317_54655325,chr17_54655317_54655325,chr17_54655317_54655325,chr1_86081443_86082316,chr1_86081443_86082316,chr3_157812018_157813810,chr3_157823363_157825196,chr4_111541339_111543401,chr4_111545062_111545628,chr4_111549880_111552353,chr4_111554385_111555102,chr4_111558157_111559355,chr4_111560494_111563111,chr5_50677808_50679817,chr7_35292896_35293892,chr8_11560299_11562685	CYR61,GATA4,ISL1,NOG,PITX2,SHOX2,TBX20
GO Biological Process	GO:0021536	diencephalon development	208	2.22985e-06	0.0287718	0.000138326	14.3417	35	100	4.83322e-05	0.62363	0.0062363	2.12238	10	76	chr11_31836334_31838674,chr13_79168044_79168573,chr13_79169714_79171679,chr13_79181021_79184529,chr15_58357204_58358811,chr17_54655317_54655325,chr17_54655317_54655325,chr17_54655317_54655325,chr2_45028225_45030384,chr2_45175881_45180560,chr2_45227645_45229649,chr4_111541339_111543401,chr4_111545062_111545628,chr4_111549880_111552353,chr4_111554385_111555102,chr4_111558157_111559355,chr4_11156049…	ALDH1A2,ISL1,NKX2-6,NOG,OTP,PAX6,PITX2,POU3F2,POU4F1,SIX3
GO Biological Process	GO:2000177	regulation of neural precursor cell proliferation	472	0.000568713	1	0.0155468	10.5683	23	104	6.06193e-05	0.782171	0.00752088	2.17823	10	78	chr10_118890977_118894180,chr10_118896012_118896776,chr11_31836334_31838674,chr13_40746370_40747228,chr13_41055185_41056288,chr13_41111493_41111800,chr13_41240923_41241867,chr13_95086146_95086158,chr14_29234671_29236535,chr2_45028225_45030384,chr2_45175881_45180560,chr2_45227645_45229649,chr4_177714350_177715040,chr4_177714350_177715040,chr5_76923737_76926341,chr5_76928406_76929064,chr5_76932016_…	DCT,FOXG1,FOXO1,FOXO3,NR2E1,OTP,PAX6,SIX3,VAX1,VEGFC
GO Biological Process	GO:0021872	forebrain generation of neurons	143	1.31002e-07	0.00169032	1.18204e-05	12.6386	35	102	5.96406e-05	0.769543	0.00754454	1.75934	9	63	chr11_31836334_31838674,chr13_112061955_112062791,chr13_112074876_112074910,chr13_112212075_112212266,chr13_112507698_112508206,chr13_112555823_112555987,chr13_112575212_112575735,chr13_112628189_112628792,chr13_112630296_112631672,chr13_112632730_112633175,chr13_112720171_112721425,chr13_112722719_112724583,chr13_112725605_112727160,chr13_112728349_112728964,chr13_112785388_112786727,chr13_11278…	DCT,FOXG1,NR2E1,OTP,PAX6,SATB2,SLC4A10,SOX1,TBR1
GO Biological Process	GO:0003281	ventricular septum development	233	6.58567e-06	0.0849749	0.000364699	11.3137	29	102	5.96406e-05	0.769543	0.00754454	1.75934	9	63	chr10_8092775_8100761,chr17_42705761_42706084,chr17_42705761_42706084,chr17_42705761_42706084,chr17_54655317_54655325,chr17_54655317_54655325,chr17_54655317_54655325,chr1_86081443_86082316,chr1_86081443_86082316,chr1_87793364_87793510,chr1_87793364_87793510,chr1_92011732_92012736,chr1_92011732_92012736,chr4_111541339_111543401,chr4_111545062_111545628,chr4_111549880_111552353,chr4_111554385_11155…	CYR61,FZD2,GATA3,GATA4,LMO4,NOG,PITX2,PRDM1,TGFBR3
GO Biological Process	GO:0031076	embryonic camera-type eye development	187	8.87047e-07	0.0114456	6.12062e-05	5.36316	20	105	6.32673e-05	0.816338	0.00777464	1.03326	7	37	chr11_2207455_2207660,chr11_2211039_2212133,chr11_2234043_2235450,chr11_2243060_2243685,chr11_2286788_2288051,chr11_31836334_31838674,chr15_58357204_58358811,chr2_45028225_45030384,chr2_45175881_45180560,chr2_45227645_45229649,chr4_111541339_111543401,chr4_111545062_111545628,chr4_111549880_111552353,chr4_111554385_111555102,chr4_111558157_111559355,chr4_111560494_111563111,chr6_10398494_10399281…	ALDH1A2,PAX6,PITX2,SIX3,TFAP2A,TH,TWIST1
GO Biological Process	GO:0051272	positive regulation of cellular component movement	345	9.58873e-05	1	0.00358618	49.2689	77	106	6.8911e-05	0.889159	0.00838829	12.5388	28	449	chr10_118890977_118894180,chr10_118896012_118896776,chr10_128993115_128993810,chr10_8092775_8100761,chr11_14402556_14403163,chr13_110396942_110398293,chr13_110431612_110432220,chr13_110433636_110434682,chr13_110436111_110438288,chr13_110768493_110768683,chr13_111718937_111719172,chr13_111747937_111748083,chr13_113804978_113805721,chr13_113807384_113807930,chr13_114742928_114743606,chr17_32645748_…	ARHGEF7,CCL8,CCR7,COL1A1,CYR61,DOCK1,F10,F3,GAS6,GATA3,GRB7,HDAC9,HSPB1,IRS2,ITGB3,KIAA1598,NTN1,PDGFC,PRDM14,PRKCA,RNF207,RRAS2,SMURF2,STMN1,TAC4,TTLL6,TWIST1,VEGFC
GO Biological Process	GO:0001763	morphogenesis of a branching structure	484	0.000684349	1	0.0182441	26.0512	44	111	7.65438e-05	0.987644	0.0088977	4.69157	15	168	chr13_110768493_110768683,chr17_46824292_46825371,chr17_46824292_46825371,chr17_46824292_46825371,chr17_46827113_46827626,chr17_46827113_46827626,chr17_46827113_46827626,chr17_46832247_46832919,chr17_46832247_46832919,chr17_46832247_46832919,chr17_54655317_54655325,chr17_54655317_54655325,chr17_54655317_54655325,chr17_63053202_63053996,chr17_63053202_63053996,chr17_63053202_63053996,chr17_7625412…	COL4A1,EPHA7,GNA13,HOXA11,HOXB13,HOXD11,NOG,PBX1,PITX2,PKD2,PRDM1,SFRP1,SOCS3,SPRY1,TBX20
GO Biological Process	GO:0003253	cardiac neural crest cell migration involved in outflow tract morphogenesis	69	1.13684e-10	1.46686e-06	2.12589e-08	0.841548	12	113	8.482e-05	1	0.00968525	0.111704	3	4	chr4_111541339_111543401,chr4_111545062_111545628,chr4_111549880_111552353,chr4_111554385_111555102,chr4_111558157_111559355,chr4_111560494_111563111,chr4_174427146_174428191,chr4_174427146_174428191,chr4_174439990_174440681,chr4_174439990_174440681,chr7_19145530_19147487,chr7_19149989_19150174	HAND2,PITX2,TWIST1
GO Biological Process	GO:0030111	regulation of Wnt signaling pathway	122	4.15297e-08	0.000535858	4.39228e-06	36.0736	72	115	8.95719e-05	1	0.01005	8.85255	22	317	chr11_111809582_111810533,chr11_111845646_111846087,chr11_111847475_111848638,chr13_111505528_111505942,chr13_111718937_111719172,chr13_111747937_111748083,chr13_40746370_40747228,chr13_41055185_41056288,chr13_41111493_41111800,chr13_41240923_41241867,chr17_16281514_16282434,chr17_16281514_16282434,chr17_16281514_16282434,chr17_26577563_26577877,chr17_26577563_26577877,chr17_26577563_26577877,chr…	ANKRD10,AXIN2,COL1A1,CSNK1D,DIXDC1,FOXO1,FOXO3,GRB10,ISL1,JADE1,KIAA0922,MCC,NLK,NOG,SFRP1,SIX3,SMURF2,SOST,TBX18,TLR2,TRABD2B,UBB
GO Biological Process	GO:0034109	homotypic cell-cell adhesion	70	1.20611e-10	1.55624e-06	2.2232e-08	4.58315	24	114	8.94478e-05	1	0.0101241	1.45215	8	52	chr11_5265008_5265215,chr13_114742928_114743606,chr17_45307312_45307606,chr17_45307312_45307606,chr17_45307312_45307606,chr17_79315269_79316841,chr17_79315269_79316841,chr17_79315269_79316841,chr17_79320473_79320652,chr17_79320473_79320652,chr17_79320473_79320652,chr17_79359767_79360456,chr17_79359767_79360456,chr17_79359767_79360456,chr17_79361553_79361742,chr17_79361553_79361742,chr17_79361553_…	ACTG1,FGA,FGG,GAS6,HBB,HSPB1,ITGB3,SLC7A11
GO Biological Process	GO:0016055	Wnt signaling pathway	54	2.30161e-11	2.96976e-07	5.49956e-09	34.6395	79	123	0.000114156	1	0.0119752	9.63448	23	345	chr10_8092775_8100761,chr11_10750074_10750973,chr11_111809582_111810533,chr11_111845646_111846087,chr11_111847475_111848638,chr13_37679951_37681255,chr13_93877559_93877835,chr17_16281514_16282434,chr17_16281514_16282434,chr17_16281514_16282434,chr17_26577563_26577877,chr17_26577563_26577877,chr17_26577563_26577877,chr17_41836261_41837048,chr17_41836261_41837048,chr17_41836261_41837048,chr17_42705…	AXIN2,CSNK1A1L,CSNK1D,CTR9,CUL1,DIXDC1,FZD2,GATA3,GPC6,HOXB9,KIAA0922,MAP3K7,MCC,NLK,PITX2,SFRP1,SMURF2,SOST,T,TBL1XR1,TNRC6C,TRABD2B,UBB
GO Biological Process	GO:0030178	negative regulation of Wnt signaling pathway	175	6.01219e-07	0.00775752	4.43287e-05	21.833	48	125	0.000129264	1	0.0133431	5.4735	16	196	chr13_40746370_40747228,chr13_41055185_41056288,chr13_41111493_41111800,chr13_41240923_41241867,chr17_16281514_16282434,chr17_16281514_16282434,chr17_16281514_16282434,chr17_26577563_26577877,chr17_26577563_26577877,chr17_26577563_26577877,chr17_41836261_41837048,chr17_41836261_41837048,chr17_41836261_41837048,chr17_54655317_54655325,chr17_54655317_54655325,chr17_54655317_54655325,chr17_63225111_…	AXIN2,FOXO1,FOXO3,GRB10,ISL1,JADE1,KIAA0922,MCC,NLK,NOG,SFRP1,SIX3,SOST,TBX18,TRABD2B,UBB
GO Molecular Function	GO:0033613	activating transcription factor binding	106	0.000315828	1	0.0124305	8.19416	20	20	8.66138e-05	0.361353	0.0180676	1.84312	9	66	chr1_116380316_116381082,chr1_116382096_116382363,chr4_111541339_111543401,chr4_111545062_111545628,chr4_111549880_111552353,chr4_111554385_111555102,chr4_111558157_111559355,chr4_111560494_111563111,chr4_122721721_122722383,chr4_122721721_122722383,chr4_174427146_174428191,chr4_174427146_174428191,chr4_174439990_174440681,chr4_174439990_174440681,chr5_50677808_50679817,chr5_87955366_87955859,chr…	EXOSC9,GATA4,HAND2,ISL1,MEF2C,NHLH2,PITX2,T,TBX20
GO Biological Process	GO:0001701	in utero embryonic development	225	5.10814e-06	0.0659103	0.000292935	32.2591	60	134	0.00019648	1	0.0189193	8.71292	21	312	chr10_8092775_8100761,chr11_10750074_10750973,chr11_19366443_19366793,chr11_2029309_2029688,chr11_2036573_2037173,chr11_2207455_2207660,chr11_2211039_2212133,chr11_2234043_2235450,chr11_2243060_2243685,chr11_2286788_2288051,chr11_2292000_2293665,chr11_2294872_2295729,chr11_2308362_2309287,chr11_2314836_2315339,chr11_2883529_2884460,chr17_17184692_17185060,chr17_17184692_17185060,chr17_17184692_17…	ASCL2,CDKN1C,COPS3,CTR9,CYR61,E2F8,GATA3,GNA13,HAND2,IGF2,NDEL1,NOG,PITX2,PKD2,POLG2,PRDM1,PRDM14,SKIL,SOCS3,SYF2,TWIST1
GO Biological Process	GO:0046189	phenol-containing compound biosynthetic process	370	0.000137919	1	0.00480965	4.79562	15	136	0.000225002	1	0.0213471	0.893633	6	32	chr10_8092775_8100761,chr11_2207455_2207660,chr11_2211039_2212133,chr11_2234043_2235450,chr11_2243060_2243685,chr11_2286788_2288051,chr13_95086146_95086158,chr15_28014188_28014520,chr15_28339563_28340459,chr15_28343577_28344730,chr4_174427146_174428191,chr4_174427146_174428191,chr4_174439990_174440681,chr4_174439990_174440681,chr7_124404244_124404822	DCT,GATA3,GPR37,HAND2,OCA2,TH
GO Biological Process	GO:0021517	ventral spinal cord development	66	7.70453e-11	9.94116e-07	1.50624e-08	7.92824	32	138	0.000229966	1	0.0215018	1.25667	7	45	chr11_31836334_31838674,chr13_112061955_112062791,chr13_112074876_112074910,chr13_112212075_112212266,chr13_112507698_112508206,chr13_112555823_112555987,chr13_112575212_112575735,chr13_112628189_112628792,chr13_112630296_112631672,chr13_112632730_112633175,chr13_112720171_112721425,chr13_112722719_112724583,chr13_112725605_112727160,chr13_112728349_112728964,chr13_112785388_112786727,chr13_11278…	HOXD10,ISL1,LMO4,NKX6-1,PAX6,SOX1,TBX20
GO Biological Process	GO:0021987	cerebral cortex development	498	0.000774892	1	0.0200772	17.1765	32	141	0.000235764	1	0.0215749	3.04394	11	109	chr10_119301464_119306659,chr11_111809582_111810533,chr11_111845646_111846087,chr11_111847475_111848638,chr11_2207455_2207660,chr11_2211039_2212133,chr11_2234043_2235450,chr11_2243060_2243685,chr11_2286788_2288051,chr11_31836334_31838674,chr14_29234671_29236535,chr17_8311594_8311836,chr17_8311594_8311836,chr17_8311594_8311836,chr2_162279324_162281498,chr4_94753295_94753431,chr4_94755520_94756895,…	ATOH1,DIXDC1,EMX2,FOXG1,NDEL1,NR2E1,PAX5,PAX6,POU3F2,TBR1,TH
GO Biological Process	GO:1905114	cell surface receptor signaling pathway involved in cell-cell signaling	131	6.25265e-08	0.00080678	6.15862e-06	45.1757	84	150	0.000350548	1	0.0301541	11.7569	25	421	chr10_8092775_8100761,chr11_10750074_10750973,chr11_111809582_111810533,chr11_111845646_111846087,chr11_111847475_111848638,chr13_37679951_37681255,chr13_93877559_93877835,chr17_16281514_16282434,chr17_16281514_16282434,chr17_16281514_16282434,chr17_26577563_26577877,chr17_26577563_26577877,chr17_26577563_26577877,chr17_40337590_40337892,chr17_40337590_40337892,chr17_40337590_40337892,chr17_41836…	AXIN2,CSNK1A1L,CSNK1D,CTR9,CUL1,DIXDC1,FZD2,GATA3,GPC6,HCRT,HOXB9,KIAA0922,MAP3K7,MCC,MEF2C,NLK,PITX2,SFRP1,SMURF2,SOST,T,TBL1XR1,TNRC6C,TRABD2B,UBB
GO Biological Process	GO:0021510	spinal cord development	121	4.03452e-08	0.000520574	4.30227e-06	14.3391	39	162	0.000410603	1	0.0327038	2.73675	10	98	chr11_31836334_31838674,chr13_112061955_112062791,chr13_112074876_112074910,chr13_112212075_112212266,chr13_112507698_112508206,chr13_112555823_112555987,chr13_112575212_112575735,chr13_112628189_112628792,chr13_112630296_112631672,chr13_112632730_112633175,chr13_112720171_112721425,chr13_112722719_112724583,chr13_112725605_112727160,chr13_112728349_112728964,chr13_112785388_112786727,chr13_11278…	HOXD10,ISL1,LMO4,NKX6-1,NOG,PAX6,PKD2,SOX1,TBX20,ZIC1
GO Biological Process	GO:0021869	forebrain ventricular zone progenitor cell division	50	8.8576e-12	1.1429e-07	2.28579e-09	1.5265	16	157	0.000406655	1	0.0334208	0.167556	3	6	chr11_111809582_111810533,chr11_111845646_111846087,chr11_111847475_111848638,chr13_95086146_95086158,chr6_99273157_99273830,chr6_99273157_99273830,chr6_99273157_99273830,chr6_99275305_99277015,chr6_99275305_99277015,chr6_99275305_99277015,chr6_99291343_99293292,chr6_99291343_99293292,chr6_99291343_99293292,chr6_99295470_99295790,chr6_99295470_99295790,chr6_99295470_99295790	DCT,DIXDC1,POU3F2
GO Biological Process	GO:0061309	cardiac neural crest cell development involved in outflow tract morphogenesis	125	4.54505e-08	0.000586448	4.69158e-06	1.45176	12	157	0.000406655	1	0.0334208	0.167556	3	6	chr4_111541339_111543401,chr4_111545062_111545628,chr4_111549880_111552353,chr4_111554385_111555102,chr4_111558157_111559355,chr4_111560494_111563111,chr4_174427146_174428191,chr4_174427146_174428191,chr4_174439990_174440681,chr4_174439990_174440681,chr7_19145530_19147487,chr7_19149989_19150174	HAND2,PITX2,TWIST1
GO Biological Process	GO:0042421	norepinephrine biosynthetic process	159	2.425e-07	0.00312898	1.96791e-05	1.09457	10	157	0.000406655	1	0.0334208	0.167556	3	6	chr10_8092775_8100761,chr11_2207455_2207660,chr11_2211039_2212133,chr11_2234043_2235450,chr11_2243060_2243685,chr11_2286788_2288051,chr4_174427146_174428191,chr4_174427146_174428191,chr4_174439990_174440681,chr4_174439990_174440681	GATA3,HAND2,TH
GO Biological Process	GO:0060828	regulation of canonical Wnt signaling pathway	108	9.59694e-09	0.000123829	1.14657e-06	25.9452	59	167	0.000457673	1	0.0353614	6.73017	17	241	chr11_111809582_111810533,chr11_111845646_111846087,chr11_111847475_111848638,chr13_111505528_111505942,chr13_111718937_111719172,chr13_111747937_111748083,chr13_40746370_40747228,chr13_41055185_41056288,chr13_41111493_41111800,chr13_41240923_41241867,chr17_16281514_16282434,chr17_16281514_16282434,chr17_16281514_16282434,chr17_41836261_41837048,chr17_41836261_41837048,chr17_41836261_41837048,chr…	ANKRD10,AXIN2,COL1A1,CSNK1D,DIXDC1,FOXO1,FOXO3,ISL1,JADE1,KIAA0922,MCC,NOG,SFRP1,SMURF2,SOST,TBX18,UBB
GO Biological Process	GO:0035019	somatic stem cell population maintenance	471	0.000566302	1	0.0155138	9.89903	22	170	0.000485318	1	0.0368356	1.84312	8	66	chr11_2207455_2207660,chr11_2211039_2212133,chr11_2234043_2235450,chr11_2243060_2243685,chr11_2286788_2288051,chr11_2292000_2293665,chr11_2294872_2295729,chr11_2308362_2309287,chr11_2314836_2315339,chr17_54655317_54655325,chr17_54655317_54655325,chr17_54655317_54655325,chr1_165322784_165327005,chr2_43188839_43188940,chr2_43271223_43271691,chr2_43294942_43295753,chr2_45175881_45180560,chr2_4522764…	ASCL2,NOG,NR2E1,PBX1,PRDM14,SFRP1,SIX2,ZFP36L2
GO Biological Process	GO:0021879	forebrain neuron differentiation	163	2.82866e-07	0.00364982	2.23916e-05	11.3089	32	172	0.000507931	1	0.0381037	1.42423	7	51	chr11_31836334_31838674,chr13_112061955_112062791,chr13_112074876_112074910,chr13_112212075_112212266,chr13_112507698_112508206,chr13_112555823_112555987,chr13_112575212_112575735,chr13_112628189_112628792,chr13_112630296_112631672,chr13_112632730_112633175,chr13_112720171_112721425,chr13_112722719_112724583,chr13_112725605_112727160,chr13_112728349_112728964,chr13_112785388_112786727,chr13_11278…	FOXG1,OTP,PAX6,SATB2,SLC4A10,SOX1,TBR1
GO Biological Process	GO:0030168	platelet activation	111	1.16342e-08	0.000150117	1.3524e-06	11.9687	36	174	0.000531634	1	0.0394234	3.88172	12	139	chr11_5265008_5265215,chr13_114742928_114743606,chr17_45307312_45307606,chr17_45307312_45307606,chr17_45307312_45307606,chr17_48258561_48259448,chr17_48258561_48259448,chr17_48258561_48259448,chr17_63053202_63053996,chr17_63053202_63053996,chr17_63053202_63053996,chr17_64297603_64297988,chr17_64297603_64297988,chr17_64297603_64297988,chr17_79315269_79316841,chr17_79315269_79316841,chr17_79315269_…	ACTG1,COL1A1,FGA,FGG,GAS6,GNA13,HBB,HSPB1,ITGB3,PIK3R5,PRKCA,SLC7A11
GO Biological Process	GO:0048596	embryonic camera-type eye morphogenesis	440	0.00035807	1	0.0105004	4.13553	13	177	0.000557047	1	0.0406078	0.698151	5	25	chr11_2207455_2207660,chr11_2211039_2212133,chr11_2234043_2235450,chr11_2243060_2243685,chr11_2286788_2288051,chr11_31836334_31838674,chr2_45028225_45030384,chr2_45175881_45180560,chr2_45227645_45229649,chr6_10398494_10399281,chr6_10404363_10405499,chr7_19145530_19147487,chr7_19149989_19150174	PAX6,SIX3,TFAP2A,TH,TWIST1
GO Molecular Function	GO:0001205	transcriptional activator activity, RNA polymerase II distal enhancer sequence-specific binding	67	9.79359e-06	0.0408589	0.000609834	3.31797	14	22	0.000225002	0.93871	0.0426686	0.893633	6	32	chr12_54440773_54442075,chr12_54444047_54444985,chr12_54446019_54449761,chr13_79168044_79168573,chr13_79169714_79171679,chr13_79181021_79184529,chr1_10895517_10896343,chr1_10948457_10949944,chr1_11000722_11001038,chr2_45028225_45030384,chr2_45175881_45180560,chr2_45227645_45229649,chr5_87955366_87955859,chr5_87967728_87969886	ENSG00000273266,HOXC4,MEF2C,POU4F1,SIX3,TARDBP
GO Biological Process	GO:0021515	cell differentiation in spinal cord	59	4.41551e-11	5.69734e-07	9.65651e-09	7.75137	32	187	0.000644584	1	0.0444763	1.48008	7	53	chr11_31836334_31838674,chr13_112061955_112062791,chr13_112074876_112074910,chr13_112212075_112212266,chr13_112507698_112508206,chr13_112555823_112555987,chr13_112575212_112575735,chr13_112628189_112628792,chr13_112630296_112631672,chr13_112632730_112633175,chr13_112720171_112721425,chr13_112722719_112724583,chr13_112725605_112727160,chr13_112728349_112728964,chr13_112785388_112786727,chr13_11278…	HOXD10,ISL1,LMO4,NKX6-1,PAX6,SOX1,TBX20
GO Biological Process	GO:0043388	positive regulation of DNA binding	404	0.000248832	1	0.00794724	6.8183	18	187	0.000644584	1	0.0444763	1.48008	7	53	chr10_8092775_8100761,chr13_28491809_28494177,chr13_79168044_79168573,chr13_79169714_79171679,chr13_79181021_79184529,chr4_111541339_111543401,chr4_111545062_111545628,chr4_111549880_111552353,chr4_111554385_111555102,chr4_111558157_111559355,chr4_111560494_111563111,chr4_174427146_174428191,chr4_174427146_174428191,chr4_174439990_174440681,chr4_174439990_174440681,chr5_50677808_50679817,chr7_191…	GATA3,HAND2,ISL1,PDX1,PITX2,POU4F1,TWIST1
GO Biological Process	GO:0007422	peripheral nervous system development	303	5.10706e-05	0.658964	0.0021748	9.51504	24	190	0.000656849	1	0.044607	1.9269	8	69	chr13_79168044_79168573,chr13_79169714_79171679,chr13_79181021_79184529,chr1_25349006_25349681,chr2_176968052_176970064,chr2_176971304_176971355,chr2_176985953_176989586,chr4_174427146_174428191,chr4_174427146_174428191,chr4_174439990_174440681,chr4_174439990_174440681,chr5_50677808_50679817,chr6_99273157_99273830,chr6_99273157_99273830,chr6_99273157_99273830,chr6_99275305_99277015,chr6_99275305_…	EDNRB,HAND2,HOXD10,HOXD9,ISL1,POU3F2,POU4F1,RUNX3
GO Biological Process	GO:0045577	regulation of B cell differentiation	62	6.04325e-11	7.79761e-07	1.25768e-08	2.64173	19	192	0.000673988	1	0.0452941	0.726077	5	26	chr17_37911186_37911329,chr17_37911186_37911329,chr17_37911186_37911329,chr17_40428759_40429406,chr17_40428759_40429406,chr17_40428759_40429406,chr2_43188839_43188940,chr2_43271223_43271691,chr2_43294942_43295753,chr6_106433444_106434623,chr6_106433444_106434623,chr6_106433444_106434623,chr6_106440072_106442588,chr6_106440072_106442588,chr6_106440072_106442588,chr6_106583161_106583179,chr6_106583…	IKZF3,PRDM1,SFRP1,STAT5B,ZFP36L2
GO Cellular Component	GO:0005667	transcription factor complex	12	9.95394e-08	0.000165733	1.38111e-05	32.6514	66	1	2.84072e-05	0.0472979	0.0472979	8.7967	23	315	chr10_8092775_8100761,chr11_122850140_122851122,chr11_12620869_12621248,chr11_19366443_19366793,chr11_2207455_2207660,chr11_2211039_2212133,chr11_2234043_2235450,chr11_2243060_2243685,chr11_2286788_2288051,chr11_2292000_2293665,chr11_2294872_2295729,chr11_2308362_2309287,chr11_2314836_2315339,chr12_85671811_85674531,chr13_37495632_37495847,chr15_68120393_68120412,chr17_46795860_46797764,chr17_467…	ALX1,ASCL2,BSX,E2F8,FOXE3,GATA3,GATA4,HAND2,HDAC9,HOXA10,HOXA11,HOXB13,HOXB9,LMO4,NHLH2,PBX1,PITX2,POU3F2,SATB2,SKOR1,SMAD1,SMAD9,TEAD1
GO Biological Process	GO:0030279	negative regulation of ossification	453	0.000436248	1	0.0124259	8.41034	20	196	0.000723812	1	0.0476497	1.95482	8	70	chr17_41836261_41837048,chr17_41836261_41837048,chr17_41836261_41837048,chr17_54655317_54655325,chr17_54655317_54655325,chr17_54655317_54655325,chr17_63225111_63225392,chr17_63225111_63225392,chr17_63225111_63225392,chr4_139609965_139610188,chr4_139609965_139610188,chr4_174427146_174428191,chr4_174427146_174428191,chr4_174439990_174440681,chr4_174439990_174440681,chr5_87955366_87955859,chr5_87967…	AXIN2,CCRN4L,HAND2,MEF2C,NOG,SFRP1,SOST,TWIST1
# GREAT version 4.0.4	Species assembly: hg19	Association rule: Basal+extension: 5000 bp upstream, 1000 bp downstream, 1000000 bp max extension, curated regulatory domains included
# Adult lung tissue
# Ontology	ID	Desc	BinomRank	BinomP	BinomBonfP	BinomFdrQ	ExpRegions	ObsRegions	HyperRank	HyperP	HyperBonfP	HyperFdrQ	ExpGenes	ObsGenes	TotalGenes	Regions	Genes
GO Molecular Function	GO:0000981	RNA polymerase II transcription factor activity, sequence-specific DNA binding	31	1.23943e-54	5.17088e-51	1.66803e-52	90.4042	257	1	1.25838e-26	5.24994e-23	5.24994e-23	7.16675	48	764	chr10_118896363_118897280,chr10_118896363_118897280,chr10_8094093_8097331,chr11_2290953_2292914,chr11_31838674_31839947,chr12_54367250_54367822,chr12_54447807_54448769,chr12_54447807_54448769,chr12_54447807_54448769,chr12_85673860_85674531,chr13_112720927_112721425,chr13_112720927_112721425,chr13_112720927_112721425,chr13_112720927_112721425,chr13_112720927_112721425,chr13_112720927_112721425,chr…	ALX1,ASCL2,ATOH1,BARHL2,ENSG00000273266,FEZF1,FOXD2,FOXE3,FOXG1,GATA3,GATA4,HAND2,HOXA10,HOXC11,HOXC4,HOXD10,HOXD8,HOXD9,IRX2,ISL1,LMX1A,MEF2C,NHLH2,NKX6-1,NR2E1,NRF1,PAX5,PAX6,PBX1,PCBP3,PDX1,PITX2,POU4F1,POU4F2,SATB2,SIM1,SOX1,SOX21,SP8,SP9,T,TBX20,TFAP2A,TWIST1,VAX1,VGLL2,ZIC1,ZNF518B
GO Biological Process	GO:0007389	pattern specification process	72	1.17593e-161	1.5173e-157	2.10736e-159	49.9957	317	2	9.33307e-23	1.20425e-18	6.02123e-19	3.80851	34	406	chr10_119301464_119302540,chr11_20184487_20184718,chr11_20184487_20184718,chr11_20184487_20184718,chr11_20184487_20184718,chr11_20184487_20184718,chr11_20184487_20184718,chr11_20184487_20184718,chr11_20184487_20184718,chr11_20184487_20184718,chr11_20184487_20184718,chr11_20184487_20184718,chr11_20184487_20184718,chr11_20184487_20184718,chr11_20184487_20184718,chr11_20184487_20184718,chr11_2018448…	ALDH1A2,ALX1,COBL,DBX1,EMX2,ENSG00000273266,FEZF1,FOXG1,GATA4,HAND2,HOXA10,HOXC11,HOXC4,HOXD10,HOXD11,HOXD8,HOXD9,IRX2,ISL1,LHX1,MEF2C,NKX6-1,PAX6,PBX1,PCDH8,PITX2,SATB2,SFRP1,SOX1,SP8,T,TBR1,TBX20,ZIC1
GO Biological Process	GO:0003002	regionalization	76	1.50865e-160	1.94661e-156	2.56133e-158	39.5344	288	1	5.87556e-23	7.58124e-19	7.58124e-19	2.93612	31	313	chr10_119301464_119302540,chr11_20184487_20184718,chr11_20184487_20184718,chr11_20184487_20184718,chr11_20184487_20184718,chr11_20184487_20184718,chr11_20184487_20184718,chr11_20184487_20184718,chr11_20184487_20184718,chr11_20184487_20184718,chr11_20184487_20184718,chr11_20184487_20184718,chr11_20184487_20184718,chr11_20184487_20184718,chr11_20184487_20184718,chr11_20184487_20184718,chr11_2018448…	ALDH1A2,ALX1,COBL,DBX1,EMX2,ENSG00000273266,FEZF1,FOXG1,GATA4,HOXA10,HOXC11,HOXC4,HOXD10,HOXD11,HOXD8,HOXD9,IRX2,ISL1,LHX1,MEF2C,NKX6-1,PAX6,PBX1,PCDH8,PITX2,SFRP1,SOX1,SP8,T,TBR1,TBX20
GO Molecular Function	GO:0001012	RNA polymerase II regulatory region DNA binding	34	3.68286e-46	1.53649e-42	4.51909e-44	69.1984	207	3	8.75413e-21	3.65223e-17	1.21741e-17	5.75028	38	613	chr10_118896363_118897280,chr10_118896363_118897280,chr10_8094093_8097331,chr11_2290953_2292914,chr11_31838674_31839947,chr12_54367250_54367822,chr12_54447807_54448769,chr12_54447807_54448769,chr12_54447807_54448769,chr12_85673860_85674531,chr13_112720927_112721425,chr13_112720927_112721425,chr13_112720927_112721425,chr13_112720927_112721425,chr13_112720927_112721425,chr13_112720927_112721425,chr…	ALX1,ASCL2,ATOH1,BARHL2,ENSG00000273266,FEZF1,GATA3,GATA4,HAND2,HOXA10,HOXC11,HOXC4,HOXD10,HOXD8,HOXD9,ISL1,LMX1A,MEF2C,NHLH2,NKX6-1,NRF1,PAX5,PAX6,PBX1,PDX1,PITX2,POU4F1,POU4F2,PRDM14,SATB2,SOX1,SOX21,T,TBR1,TBX20,TFAP2A,VAX1,ZIC1
GO Molecular Function	GO:0000977	RNA polymerase II regulatory region sequence-specific DNA binding	33	1.97053e-46	8.22106e-43	2.49123e-44	68.9107	207	2	7.8162e-21	3.26092e-17	1.63046e-17	5.73152	38	611	chr10_118896363_118897280,chr10_118896363_118897280,chr10_8094093_8097331,chr11_2290953_2292914,chr11_31838674_31839947,chr12_54367250_54367822,chr12_54447807_54448769,chr12_54447807_54448769,chr12_54447807_54448769,chr12_85673860_85674531,chr13_112720927_112721425,chr13_112720927_112721425,chr13_112720927_112721425,chr13_112720927_112721425,chr13_112720927_112721425,chr13_112720927_112721425,chr…	ALX1,ASCL2,ATOH1,BARHL2,ENSG00000273266,FEZF1,GATA3,GATA4,HAND2,HOXA10,HOXC11,HOXC4,HOXD10,HOXD8,HOXD9,ISL1,LMX1A,MEF2C,NHLH2,NKX6-1,NRF1,PAX5,PAX6,PBX1,PDX1,PITX2,POU4F1,POU4F2,PRDM14,SATB2,SOX1,SOX21,T,TBR1,TBX20,TFAP2A,VAX1,ZIC1
GO Molecular Function	GO:0000976	transcription regulatory region sequence-specific DNA binding	35	8.63623e-40	3.60304e-36	1.02944e-37	77.0984	208	4	6.15657e-20	2.56852e-16	6.42131e-17	6.46321	39	689	chr10_118896363_118897280,chr10_118896363_118897280,chr10_8094093_8097331,chr11_2290953_2292914,chr11_31838674_31839947,chr12_54367250_54367822,chr12_54447807_54448769,chr12_54447807_54448769,chr12_54447807_54448769,chr12_85673860_85674531,chr13_112720927_112721425,chr13_112720927_112721425,chr13_112720927_112721425,chr13_112720927_112721425,chr13_112720927_112721425,chr13_112720927_112721425,chr…	ALX1,ASCL2,ATOH1,BARHL2,ENSG00000273266,FEZF1,GATA3,GATA4,HAND2,HOXA10,HOXC11,HOXC4,HOXD10,HOXD8,HOXD9,ISL1,LMX1A,MEF2C,NHLH2,NKX6-1,NRF1,PAX5,PAX6,PBX1,PDX1,PITX2,POU4F1,POU4F2,PRDM14,SATB2,SOX1,SOX21,T,TBR1,TBX18,TBX20,TFAP2A,VAX1,ZIC1
GO Biological Process	GO:0048598	embryonic morphogenesis	63	2.66183e-171	3.43456e-167	5.45169e-169	68.5511	371	3	2.01609e-20	2.60136e-16	8.67119e-17	5.17807	36	552	chr10_8094093_8097331,chr11_31838674_31839947,chr11_79151719_79152112,chr11_79151719_79152112,chr11_79151719_79152112,chr12_54367250_54367822,chr12_54447807_54448769,chr12_54447807_54448769,chr12_54447807_54448769,chr12_85673860_85674531,chr13_28493404_28494996,chr13_53424812_53425257,chr13_53424812_53425257,chr13_53424812_53425257,chr13_53424812_53425257,chr13_53424812_53425257,chr13_53424812_53…	ALDH1A2,ALX1,ATOH1,COBL,ENSG00000273266,FOXG1,GATA3,GATA4,HAND2,HOXA10,HOXC11,HOXC4,HOXD10,HOXD9,IRX2,IRX5,LHX1,MEF2C,PAX5,PAX6,PBX1,PCDH8,PDX1,PITX2,SATB2,SFRP1,SHOX2,SP8,SP9,T,TBX20,TENM4,TFAP2A,TWIST1,USH1G,ZIC1
GO Molecular Function	GO:0001067	regulatory region nucleic acid binding	21	2.01225e-110	8.39513e-107	3.99768e-108	91.3718	344	8	2.25704e-19	9.41639e-16	1.17705e-16	7.92657	42	845	chr10_118896363_118897280,chr10_118896363_118897280,chr10_8094093_8097331,chr11_2290953_2292914,chr11_31838674_31839947,chr12_54367250_54367822,chr12_54447807_54448769,chr12_54447807_54448769,chr12_54447807_54448769,chr12_85673860_85674531,chr13_112720927_112721425,chr13_112720927_112721425,chr13_112720927_112721425,chr13_112720927_112721425,chr13_112720927_112721425,chr13_112720927_112721425,chr…	ALX1,ASCL2,ATOH1,BARHL2,CBX4,ENSG00000273266,FEZF1,GATA3,GATA4,HAND2,HOXA10,HOXC11,HOXC4,HOXD10,HOXD8,HOXD9,ISL1,LMX1A,MEF2C,NEUROG2,NHLH2,NKX6-1,NRF1,PAX5,PAX6,PBX1,PDX1,PITX2,POU4F1,POU4F2,PRDM14,SATB2,SOX1,SOX21,T,TBR1,TBX18,TBX20,TFAP2A,TWIST1,VAX1,ZIC1
GO Molecular Function	GO:0000975	regulatory region DNA binding	20	1.29407e-110	5.39886e-107	2.69943e-108	91.2291	344	7	2.16052e-19	9.01368e-16	1.28767e-16	7.91719	42	844	chr10_118896363_118897280,chr10_118896363_118897280,chr10_8094093_8097331,chr11_2290953_2292914,chr11_31838674_31839947,chr12_54367250_54367822,chr12_54447807_54448769,chr12_54447807_54448769,chr12_54447807_54448769,chr12_85673860_85674531,chr13_112720927_112721425,chr13_112720927_112721425,chr13_112720927_112721425,chr13_112720927_112721425,chr13_112720927_112721425,chr13_112720927_112721425,chr…	ALX1,ASCL2,ATOH1,BARHL2,CBX4,ENSG00000273266,FEZF1,GATA3,GATA4,HAND2,HOXA10,HOXC11,HOXC4,HOXD10,HOXD8,HOXD9,ISL1,LMX1A,MEF2C,NEUROG2,NHLH2,NKX6-1,NRF1,PAX5,PAX6,PBX1,PDX1,PITX2,POU4F1,POU4F2,PRDM14,SATB2,SOX1,SOX21,T,TBR1,TBX18,TBX20,TFAP2A,TWIST1,VAX1,ZIC1
GO Molecular Function	GO:0044212	transcription regulatory region DNA binding	19	1.01707e-110	4.2432e-107	2.23326e-108	91.1513	344	6	1.9793e-19	8.25764e-16	1.37627e-16	7.89843	42	842	chr10_118896363_118897280,chr10_118896363_118897280,chr10_8094093_8097331,chr11_2290953_2292914,chr11_31838674_31839947,chr12_54367250_54367822,chr12_54447807_54448769,chr12_54447807_54448769,chr12_54447807_54448769,chr12_85673860_85674531,chr13_112720927_112721425,chr13_112720927_112721425,chr13_112720927_112721425,chr13_112720927_112721425,chr13_112720927_112721425,chr13_112720927_112721425,chr…	ALX1,ASCL2,ATOH1,BARHL2,CBX4,ENSG00000273266,FEZF1,GATA3,GATA4,HAND2,HOXA10,HOXC11,HOXC4,HOXD10,HOXD8,HOXD9,ISL1,LMX1A,MEF2C,NEUROG2,NHLH2,NKX6-1,NRF1,PAX5,PAX6,PBX1,PDX1,PITX2,POU4F1,POU4F2,PRDM14,SATB2,SOX1,SOX21,T,TBR1,TBX18,TBX20,TFAP2A,TWIST1,VAX1,ZIC1
GO Molecular Function	GO:0001228	transcriptional activator activity, RNA polymerase II transcription regulatory region sequence-specific binding	29	3.42899e-67	1.43058e-63	4.93302e-65	50.4777	206	5	1.75564e-19	7.32451e-16	1.4649e-16	3.84603	31	410	chr10_8094093_8097331,chr11_31838674_31839947,chr12_54367250_54367822,chr12_54447807_54448769,chr12_54447807_54448769,chr12_54447807_54448769,chr12_85673860_85674531,chr13_112720927_112721425,chr13_112720927_112721425,chr13_112720927_112721425,chr13_112720927_112721425,chr13_112720927_112721425,chr13_112720927_112721425,chr13_112720927_112721425,chr13_112720927_112721425,chr13_112720927_112721425…	ALX1,ATOH1,BARHL2,ENSG00000273266,FOXD2,GATA3,GATA4,HAND2,HOXA10,HOXC11,HOXC4,HOXD10,HOXD8,ISL1,LMX1A,MEF2C,NHLH2,NR2E1,NRF1,PAX5,PAX6,PBX1,PITX2,POU4F1,POU4F2,SATB2,SOX1,SOX21,TBX20,TFAP2A,ZIC1
GO Molecular Function	GO:1990837	sequence-specific double-stranded DNA binding	36	1.415e-37	5.90336e-34	1.63982e-35	79.9026	208	9	4.19788e-19	1.75136e-15	1.94595e-16	6.82905	39	728	chr10_118896363_118897280,chr10_118896363_118897280,chr10_8094093_8097331,chr11_2290953_2292914,chr11_31838674_31839947,chr12_54367250_54367822,chr12_54447807_54448769,chr12_54447807_54448769,chr12_54447807_54448769,chr12_85673860_85674531,chr13_112720927_112721425,chr13_112720927_112721425,chr13_112720927_112721425,chr13_112720927_112721425,chr13_112720927_112721425,chr13_112720927_112721425,chr…	ALX1,ASCL2,ATOH1,BARHL2,ENSG00000273266,FEZF1,GATA3,GATA4,HAND2,HOXA10,HOXC11,HOXC4,HOXD10,HOXD8,HOXD9,ISL1,LMX1A,MEF2C,NHLH2,NKX6-1,NRF1,PAX5,PAX6,PBX1,PDX1,PITX2,POU4F1,POU4F2,PRDM14,SATB2,SOX1,SOX21,T,TBR1,TBX18,TBX20,TFAP2A,VAX1,ZIC1
GO Biological Process	GO:0009887	animal organ morphogenesis	85	2.04586e-154	2.63977e-150	3.10561e-152	106.616	427	4	6.41694e-20	8.27978e-16	2.06994e-16	8.07666	43	861	chr10_8094093_8097331,chr11_122852284_122852698,chr11_31838674_31839947,chr12_54367250_54367822,chr12_54447807_54448769,chr12_54447807_54448769,chr12_54447807_54448769,chr12_85673860_85674531,chr13_112720927_112721425,chr13_112720927_112721425,chr13_112720927_112721425,chr13_112720927_112721425,chr13_112720927_112721425,chr13_112720927_112721425,chr13_112720927_112721425,chr13_112720927_112721425…	ALDH1A2,ALX1,ATOH1,BSX,CTNNA2,ENSG00000273266,FOXE3,FOXG1,GATA3,GATA4,HAND2,HOXC11,HOXC4,HOXD10,HOXD11,HOXD8,HOXD9,IRX2,IRX5,ISL1,LHX1,MEF2C,NKX6-1,PAX3,PAX5,PAX6,PBX1,PDX1,PITX2,POU4F1,SATB2,SFRP1,SHOX2,SLC4A10,SOX1,T,TBR1,TBX20,TFAP2A,TUFT1,TWIST1,USH1G,ZIC1
GO Molecular Function	GO:0003690	double-stranded DNA binding	37	8.269e-35	3.44983e-31	9.32385e-33	84.9485	210	10	2.02185e-18	8.43517e-15	8.43517e-16	7.56073	40	806	chr10_118896363_118897280,chr10_118896363_118897280,chr10_8094093_8097331,chr11_2290953_2292914,chr11_31838674_31839947,chr12_54367250_54367822,chr12_54447807_54448769,chr12_54447807_54448769,chr12_54447807_54448769,chr12_85673860_85674531,chr13_112720927_112721425,chr13_112720927_112721425,chr13_112720927_112721425,chr13_112720927_112721425,chr13_112720927_112721425,chr13_112720927_112721425,chr…	ALX1,ASCL2,ATOH1,BARHL2,ENSG00000273266,FEZF1,GATA3,GATA4,HAND2,HOXA10,HOXC11,HOXC4,HOXD10,HOXD8,HOXD9,ISL1,LMX1A,MEF2C,NHLH2,NKX6-1,NRF1,PAX5,PAX6,PBX1,PCBP3,PDX1,PITX2,POU4F1,POU4F2,PRDM14,SATB2,SOX1,SOX21,T,TBR1,TBX18,TBX20,TFAP2A,VAX1,ZIC1
GO Biological Process	GO:0048568	embryonic organ development	49	5.2468e-186	6.76994e-182	1.38162e-183	51.3728	345	5	3.296e-18	4.25283e-14	8.50567e-15	3.93045	30	419	chr10_8094093_8097331,chr11_2290953_2292914,chr11_31838674_31839947,chr12_54367250_54367822,chr12_54447807_54448769,chr12_54447807_54448769,chr12_54447807_54448769,chr12_85673860_85674531,chr14_29234671_29237202,chr15_58357319_58357989,chr16_54972078_54972647,chr17_35060451_35060679,chr17_35060451_35060679,chr17_35060451_35060679,chr17_35060451_35060679,chr17_35060451_35060679,chr17_35060451_3506…	ALDH1A2,ALX1,ASCL2,ATOH1,COBL,ENSG00000273266,FOXG1,GATA3,GATA4,HAND2,HOXC11,HOXC4,HOXD10,HOXD9,IRX5,LHX1,MEF2C,NKX2-6,PAX5,PAX6,PBX1,PITX2,SATB2,SHOX2,T,TBX20,TFAP2A,TWIST1,USH1G,ZIC1
GO Biological Process	GO:0009790	embryo development	125	2.86319e-117	3.69438e-113	2.9555e-115	104.317	376	7	1.8661e-17	2.40783e-13	3.43976e-14	8.49879	41	906	chr10_8094093_8097331,chr11_2290953_2292914,chr11_31838674_31839947,chr11_79151719_79152112,chr11_79151719_79152112,chr11_79151719_79152112,chr12_54367250_54367822,chr12_54447807_54448769,chr12_54447807_54448769,chr12_54447807_54448769,chr12_85673860_85674531,chr13_28493404_28494996,chr13_53424812_53425257,chr13_53424812_53425257,chr13_53424812_53425257,chr13_53424812_53425257,chr13_53424812_5342…	ALDH1A2,ALX1,ASCL2,ATOH1,COBL,ENSG00000273266,FOXG1,GATA3,GATA4,HAND2,HOXA10,HOXC11,HOXC4,HOXD10,HOXD8,HOXD9,IRX2,IRX5,ISL1,LHX1,MEF2C,NKX2-6,PAX5,PAX6,PBX1,PCDH8,PDX1,PITX2,PRDM14,SATB2,SFRP1,SHOX2,SP8,SP9,T,TBX20,TENM4,TFAP2A,TWIST1,USH1G,ZIC1
GO Biological Process	GO:0048562	embryonic organ morphogenesis	29	2.82616e-226	3.64659e-222	1.25745e-223	36.4524	339	6	1.75642e-17	2.26631e-13	3.77718e-14	2.64532	25	282	chr10_8094093_8097331,chr11_31838674_31839947,chr12_54367250_54367822,chr12_54447807_54448769,chr12_54447807_54448769,chr12_54447807_54448769,chr12_85673860_85674531,chr14_29234671_29237202,chr16_54972078_54972647,chr17_35060451_35060679,chr17_35060451_35060679,chr17_35060451_35060679,chr17_35060451_35060679,chr17_35060451_35060679,chr17_35060451_35060679,chr17_35060451_35060679,chr17_35060451_35…	ALX1,ATOH1,ENSG00000273266,FOXG1,GATA3,GATA4,HAND2,HOXC11,HOXC4,HOXD10,HOXD9,IRX5,LHX1,MEF2C,PAX5,PAX6,PITX2,SATB2,SHOX2,T,TBX20,TFAP2A,TWIST1,USH1G,ZIC1
GO Biological Process	GO:0030182	neuron differentiation	48	1.41791e-186	1.82953e-182	3.81151e-184	129.775	504	8	1.96023e-16	2.52929e-12	3.16161e-13	8.63011	40	920	chr10_118896363_118897280,chr10_118896363_118897280,chr10_119301464_119302540,chr10_8094093_8097331,chr11_20184487_20184718,chr11_20184487_20184718,chr11_20184487_20184718,chr11_20184487_20184718,chr11_20184487_20184718,chr11_20184487_20184718,chr11_20184487_20184718,chr11_20184487_20184718,chr11_20184487_20184718,chr11_20184487_20184718,chr11_20184487_20184718,chr11_20184487_20184718,chr11_20184…	ALDH1A2,ATOH1,BARHL2,CNTNAP2,COBL,CTNNA2,DBX1,EMX2,EPHA7,FEZF1,FOXG1,GATA3,HAND2,HOXD10,HOXD9,IRS2,IRX5,ISL1,LHX1,LMX1A,MEF2C,NEUROG2,NKX6-1,NR2E1,OTP,PAX6,PITX2,POU4F1,POU4F2,SATB2,SFRP1,SKOR1,SLC4A10,SOX1,TBR1,TBX20,TENM4,TLX3,USH1G,VAX1
GO Molecular Function	GO:0001077	transcriptional activator activity, RNA polymerase II core promoter proximal region sequence-specific binding	28	4.99026e-75	2.08194e-71	7.43548e-73	37.2834	188	11	1.05108e-15	4.38509e-12	3.98644e-13	2.55151	23	272	chr10_8094093_8097331,chr11_31838674_31839947,chr12_54367250_54367822,chr13_112720927_112721425,chr13_112720927_112721425,chr13_112720927_112721425,chr13_112720927_112721425,chr13_112720927_112721425,chr13_112720927_112721425,chr13_112720927_112721425,chr13_112720927_112721425,chr13_112720927_112721425,chr13_112720927_112721425,chr13_112720927_112721425,chr13_112720927_112721425,chr13_112720927_1…	ATOH1,BARHL2,GATA3,HAND2,HOXA10,HOXC11,ISL1,MEF2C,NHLH2,NR2E1,NRF1,PAX5,PAX6,PBX1,PITX2,POU4F1,POU4F2,SATB2,SOX1,SOX21,TBX20,TFAP2A,ZIC1
GO Biological Process	GO:0007417	central nervous system development	220	2.88352e-57	3.72061e-53	1.69119e-55	114.433	299	9	1.23541e-15	1.59405e-11	1.77117e-12	8.18923	38	873	chr10_118896363_118897280,chr10_118896363_118897280,chr10_119301464_119302540,chr11_111848326_111848400,chr11_111848326_111848400,chr11_111848326_111848400,chr11_20184487_20184718,chr11_20184487_20184718,chr11_20184487_20184718,chr11_20184487_20184718,chr11_20184487_20184718,chr11_20184487_20184718,chr11_20184487_20184718,chr11_20184487_20184718,chr11_20184487_20184718,chr11_20184487_20184718,chr…	ALDH1A2,ATOH1,CNTNAP2,CTNNA2,DBX1,DIXDC1,EMX2,EPHA7,FEZF1,FOXG1,HOXD10,IRS2,ISL1,LHX1,LMX1A,NHLH2,NKX2-6,NKX6-1,NR2E1,OTP,PAX5,PAX6,PDX1,PITX2,POU4F1,PTPRG,SATB2,SLC4A10,SOX1,SYNGR3,TBR1,TBX20,TENM4,TFAP2A,TLX3,VAX1,ZIC1,ZIC2
GO Molecular Function	GO:0000982	transcription factor activity, RNA polymerase II core promoter proximal region sequence-specific binding	32	9.59062e-54	4.00121e-50	1.25038e-51	54.1296	193	12	6.35456e-15	2.65112e-11	2.20927e-12	3.73346	26	398	chr10_8094093_8097331,chr11_2290953_2292914,chr11_31838674_31839947,chr12_54367250_54367822,chr13_112720927_112721425,chr13_112720927_112721425,chr13_112720927_112721425,chr13_112720927_112721425,chr13_112720927_112721425,chr13_112720927_112721425,chr13_112720927_112721425,chr13_112720927_112721425,chr13_112720927_112721425,chr13_112720927_112721425,chr13_112720927_112721425,chr13_112720927_11272…	ASCL2,ATOH1,BARHL2,FEZF1,GATA3,HAND2,HOXA10,HOXC11,ISL1,MEF2C,NHLH2,NKX6-1,NR2E1,NRF1,PAX5,PAX6,PBX1,PITX2,POU4F1,POU4F2,SATB2,SOX1,SOX21,TBX20,TFAP2A,ZIC1
GO Biological Process	GO:0006366	transcription from RNA polymerase II promoter	116	7.79197e-129	1.0054e-124	8.66722e-127	78.3174	343	10	4.88419e-15	6.30207e-11	6.30207e-12	7.63578	36	814	chr10_8094093_8097331,chr11_31838674_31839947,chr12_54367250_54367822,chr12_54447807_54448769,chr12_54447807_54448769,chr12_54447807_54448769,chr12_85673860_85674531,chr13_112720927_112721425,chr13_112720927_112721425,chr13_112720927_112721425,chr13_112720927_112721425,chr13_112720927_112721425,chr13_112720927_112721425,chr13_112720927_112721425,chr13_112720927_112721425,chr13_112720927_112721425…	ALX1,ATOH1,BARHL2,ENSG00000273266,FOXD2,FOXE3,GATA3,GATA4,HAND2,HOXA10,HOXC11,HOXC4,HOXD10,HOXD8,ISL1,LHX1,LMX1A,MEF2C,NHLH2,NKX6-1,NR2E1,NRF1,PAX3,PAX5,PAX6,PBX1,PDX1,PITX2,POU4F1,POU4F2,SATB2,SOX1,SOX21,TBX20,TFAP2A,ZIC1
GO Biological Process	GO:0001764	neuron migration	42	5.63262e-205	7.26776e-201	1.73042e-202	20.4875	263	11	6.73656e-15	8.69219e-11	7.90199e-12	1.04124	16	111	chr10_118896363_118897280,chr10_118896363_118897280,chr10_8094093_8097331,chr11_31838674_31839947,chr13_112720927_112721425,chr13_112720927_112721425,chr13_112720927_112721425,chr13_112720927_112721425,chr13_112720927_112721425,chr13_112720927_112721425,chr13_112720927_112721425,chr13_112720927_112721425,chr13_112720927_112721425,chr13_112720927_112721425,chr13_112720927_112721425,chr13_112720927…	ATOH1,BARHL2,FEZF1,FOXG1,GATA3,LHX1,MEF2C,NKX6-1,PAX6,PITX2,SATB2,SOX1,TBX20,TLX3,TWIST1,VAX1
GO Molecular Function	GO:0000987	core promoter proximal region sequence-specific DNA binding	40	1.95676e-29	8.16361e-26	2.0409e-27	45.6705	136	13	1.00357e-13	4.18689e-10	3.22069e-11	3.48957	24	372	chr10_8094093_8097331,chr11_2290953_2292914,chr11_31838674_31839947,chr12_54367250_54367822,chr13_112720927_112721425,chr13_112720927_112721425,chr13_112720927_112721425,chr13_112720927_112721425,chr13_112720927_112721425,chr13_112720927_112721425,chr13_112720927_112721425,chr13_112720927_112721425,chr13_112720927_112721425,chr13_112720927_112721425,chr13_112720927_112721425,chr13_112720927_11272…	ASCL2,ATOH1,FEZF1,GATA3,HOXA10,HOXC11,ISL1,MEF2C,NHLH2,NKX6-1,NRF1,PAX5,PAX6,PBX1,PDX1,PITX2,POU4F2,SATB2,SOX1,SOX21,T,TBX20,TFAP2A,ZIC1
GO Molecular Function	GO:0001159	core promoter proximal region DNA binding	41	4.43781e-29	1.85145e-25	4.51574e-27	46.0637	136	14	1.19579e-13	4.98884e-10	3.56346e-11	3.51771	24	375	chr10_8094093_8097331,chr11_2290953_2292914,chr11_31838674_31839947,chr12_54367250_54367822,chr13_112720927_112721425,chr13_112720927_112721425,chr13_112720927_112721425,chr13_112720927_112721425,chr13_112720927_112721425,chr13_112720927_112721425,chr13_112720927_112721425,chr13_112720927_112721425,chr13_112720927_112721425,chr13_112720927_112721425,chr13_112720927_112721425,chr13_112720927_11272…	ASCL2,ATOH1,FEZF1,GATA3,HOXA10,HOXC11,ISL1,MEF2C,NHLH2,NKX6-1,NRF1,PAX5,PAX6,PBX1,PDX1,PITX2,POU4F2,SATB2,SOX1,SOX21,T,TBX20,TFAP2A,ZIC1
GO Biological Process	GO:0009952	anterior/posterior pattern specification	161	1.9505e-94	2.51673e-90	1.56319e-92	22.7563	172	12	3.4319e-14	4.42818e-10	3.69015e-11	1.84797	19	197	chr10_119301464_119302540,chr11_31838674_31839947,chr12_54367250_54367822,chr12_54447807_54448769,chr12_54447807_54448769,chr12_54447807_54448769,chr12_85673860_85674531,chr13_53424812_53425257,chr13_53424812_53425257,chr13_53424812_53425257,chr13_53424812_53425257,chr13_53424812_53425257,chr13_53424812_53425257,chr13_53424812_53425257,chr13_53424812_53425257,chr13_53424812_53425257,chr13_5342481…	ALDH1A2,ALX1,COBL,EMX2,ENSG00000273266,FEZF1,GATA4,HOXA10,HOXC11,HOXC4,HOXD10,HOXD8,HOXD9,LHX1,PAX6,PBX1,PCDH8,SFRP1,T
GO Molecular Function	GO:0000978	RNA polymerase II core promoter proximal region sequence-specific DNA binding	39	6.6742e-31	2.78448e-27	7.13968e-29	43.5328	135	15	3.95491e-13	1.64999e-09	1.09999e-10	3.36762	23	359	chr11_2290953_2292914,chr11_31838674_31839947,chr12_54367250_54367822,chr13_112720927_112721425,chr13_112720927_112721425,chr13_112720927_112721425,chr13_112720927_112721425,chr13_112720927_112721425,chr13_112720927_112721425,chr13_112720927_112721425,chr13_112720927_112721425,chr13_112720927_112721425,chr13_112720927_112721425,chr13_112720927_112721425,chr13_112720927_112721425,chr13_112720927_1…	ASCL2,ATOH1,FEZF1,HOXA10,HOXC11,ISL1,MEF2C,NHLH2,NKX6-1,NRF1,PAX5,PAX6,PBX1,PDX1,PITX2,POU4F2,SATB2,SOX1,SOX21,T,TBX20,TFAP2A,ZIC1
GO Biological Process	GO:0045165	cell fate commitment	221	3.03137e-57	3.91138e-53	1.76985e-55	36.168	162	13	4.15992e-13	5.36755e-09	4.12888e-10	2.12001	19	226	chr10_8094093_8097331,chr11_20184487_20184718,chr11_20184487_20184718,chr11_20184487_20184718,chr11_20184487_20184718,chr11_20184487_20184718,chr11_20184487_20184718,chr11_20184487_20184718,chr11_20184487_20184718,chr11_20184487_20184718,chr11_20184487_20184718,chr11_20184487_20184718,chr11_20184487_20184718,chr11_20184487_20184718,chr11_20184487_20184718,chr11_20184487_20184718,chr11_20184487_20…	ATOH1,BARHL2,DBX1,FOXG1,GATA3,HOXD10,ISL1,MEF2C,NKX6-1,NR2E1,PAX6,POU4F1,PRDM14,SATB2,SFRP1,SOX1,TBR1,TENM4,TLX3
GO Biological Process	GO:0048663	neuron fate commitment	188	1.95653e-80	2.52451e-76	1.34282e-78	11.9846	122	14	1.46239e-12	1.88692e-08	1.3478e-09	0.637878	12	68	chr11_20184487_20184718,chr11_20184487_20184718,chr11_20184487_20184718,chr11_20184487_20184718,chr11_20184487_20184718,chr11_20184487_20184718,chr11_20184487_20184718,chr11_20184487_20184718,chr11_20184487_20184718,chr11_20184487_20184718,chr11_20184487_20184718,chr11_20184487_20184718,chr11_20184487_20184718,chr11_20184487_20184718,chr11_20184487_20184718,chr11_20184487_20184718,chr11_20184487_…	ATOH1,DBX1,FOXG1,HOXD10,ISL1,NKX6-1,PAX6,POU4F1,SATB2,SOX1,TBR1,TLX3
GO Biological Process	GO:0000122	negative regulation of transcription from RNA polymerase II promoter	246	1.1502e-41	1.48411e-37	6.03295e-40	88.1466	229	15	2.3674e-12	3.05466e-08	2.03644e-09	7.43878	32	793	chr10_118896363_118897280,chr10_118896363_118897280,chr10_8094093_8097331,chr11_2290953_2292914,chr11_31838674_31839947,chr12_85673860_85674531,chr13_28493404_28494996,chr13_79170146_79170959,chr13_79182095_79182205,chr13_79182095_79182205,chr14_29234671_29237202,chr15_68120757_68121563,chr17_77783551_77784110,chr17_77783551_77784110,chr17_77783551_77784110,chr17_77783551_77784110,chr17_77783551_…	ALX1,ASCL2,CBX4,CBX8,EDNRB,FEZF1,FOXG1,GATA3,HOXD8,HOXD9,IRX2,ISL1,MEF2C,NKX6-1,NR2E1,PAX5,PAX6,PCBP3,PDX1,PIAS1,POU4F1,POU4F2,PRDM13,PRDM14,SATB2,SHOX2,T,TBX18,TBX20,TFAP2A,TWIST1,VAX1
GO Biological Process	GO:0021953	central nervous system neuron differentiation	86	1.2877e-152	1.66152e-148	1.932e-150	30.6364	254	16	3.63401e-12	4.68896e-08	2.9306e-09	1.54779	16	165	chr11_20184487_20184718,chr11_20184487_20184718,chr11_20184487_20184718,chr11_20184487_20184718,chr11_20184487_20184718,chr11_20184487_20184718,chr11_20184487_20184718,chr11_20184487_20184718,chr11_20184487_20184718,chr11_20184487_20184718,chr11_20184487_20184718,chr11_20184487_20184718,chr11_20184487_20184718,chr11_20184487_20184718,chr11_20184487_20184718,chr11_20184487_20184718,chr11_20184487_…	DBX1,FOXG1,HOXD10,ISL1,LHX1,LMX1A,NKX6-1,NR2E1,OTP,PAX6,POU4F1,SATB2,SLC4A10,SOX1,TBR1,TBX20
GO Biological Process	GO:0060322	head development	232	2.80537e-52	3.61976e-48	1.56024e-50	93.0934	257	17	4.16423e-12	5.37311e-08	3.16065e-09	6.66958	30	711	chr10_118896363_118897280,chr10_118896363_118897280,chr10_119301464_119302540,chr11_111848326_111848400,chr11_111848326_111848400,chr11_111848326_111848400,chr11_31838674_31839947,chr13_100649800_100650073,chr13_110438256_110439234,chr13_110438256_110439234,chr13_110438256_110439234,chr13_112720927_112721425,chr13_112720927_112721425,chr13_112720927_112721425,chr13_112720927_112721425,chr13_11272…	ALDH1A2,ATOH1,CNTNAP2,CRISPLD2,CTNNA2,DIXDC1,EMX2,EPHA7,FEZF1,FOXG1,IRS2,ISL1,LHX1,LMX1A,NKX2-6,NR2E1,OTP,PAX5,PAX6,PITX2,POU4F1,PTPRG,SATB2,SLC4A10,SOX1,SYNGR3,TBR1,VAX1,ZIC1,ZIC2
GO Biological Process	GO:0007420	brain development	227	2.34151e-54	3.02126e-50	1.33095e-52	89.4653	255	18	5.75797e-12	7.42951e-08	4.1275e-09	6.30374	29	672	chr10_118896363_118897280,chr10_118896363_118897280,chr10_119301464_119302540,chr11_111848326_111848400,chr11_111848326_111848400,chr11_111848326_111848400,chr11_31838674_31839947,chr13_100649800_100650073,chr13_110438256_110439234,chr13_110438256_110439234,chr13_110438256_110439234,chr13_112720927_112721425,chr13_112720927_112721425,chr13_112720927_112721425,chr13_112720927_112721425,chr13_11272…	ALDH1A2,ATOH1,CNTNAP2,CTNNA2,DIXDC1,EMX2,EPHA7,FEZF1,FOXG1,IRS2,ISL1,LHX1,LMX1A,NKX2-6,NR2E1,OTP,PAX5,PAX6,PITX2,POU4F1,PTPRG,SATB2,SLC4A10,SOX1,SYNGR3,TBR1,VAX1,ZIC1,ZIC2
GO Biological Process	GO:0048706	embryonic skeletal system development	157	1.87427e-96	2.41837e-92	1.54036e-94	18.3555	160	20	9.58061e-12	1.23619e-07	6.18093e-09	1.15381	14	123	chr12_54367250_54367822,chr12_85673860_85674531,chr16_54972078_54972647,chr17_35060451_35060679,chr17_35060451_35060679,chr17_35060451_35060679,chr17_35060451_35060679,chr17_35060451_35060679,chr17_35060451_35060679,chr17_35060451_35060679,chr17_35060451_35060679,chr17_35060451_35060679,chr17_35060451_35060679,chr17_35060451_35060679,chr17_35060451_35060679,chr17_35060451_35060679,chr17_35060451_…	ALX1,HOXC11,HOXD10,HOXD9,IRX5,LHX1,MEF2C,PAX5,PBX1,SATB2,SHOX2,T,TFAP2A,TWIST1
GO Biological Process	GO:0051960	regulation of nervous system development	266	9.84385e-35	1.27015e-30	4.775e-33	112.53	250	19	9.54259e-12	1.23128e-07	6.48042e-09	7.36374	31	785	chr10_118896363_118897280,chr10_118896363_118897280,chr10_8094093_8097331,chr11_111848326_111848400,chr11_111848326_111848400,chr11_111848326_111848400,chr11_2290953_2292914,chr11_31838674_31839947,chr11_79151719_79152112,chr11_79151719_79152112,chr11_79151719_79152112,chr13_79170146_79170959,chr13_79182095_79182205,chr13_79182095_79182205,chr14_29234671_29237202,chr17_2652531_2653188,chr17_35060…	ASCL2,ATOH1,BARHL2,COBL,DIXDC1,EDNRB,EPHA7,FEZF1,FOXG1,GATA3,ISL1,LHX1,LIN28A,LMX1A,LRRTM1,MEF2C,NKX6-1,NR2E1,OTP,PAX6,PBX1,POU4F1,POU4F2,PTPRG,RAP1GAP2,SFRP1,SHOX2,TBR1,TENM4,TLX3,VAX1
GO Biological Process	GO:0043009	chordate embryonic development	218	1.88519e-59	2.43246e-55	1.11581e-57	62.2196	217	22	1.33553e-11	1.72323e-07	7.83287e-09	5.20621	26	555	chr10_8094093_8097331,chr11_2290953_2292914,chr11_31838674_31839947,chr12_54367250_54367822,chr12_85673860_85674531,chr13_53424812_53425257,chr13_53424812_53425257,chr13_53424812_53425257,chr13_53424812_53425257,chr13_53424812_53425257,chr13_53424812_53425257,chr13_53424812_53425257,chr13_53424812_53425257,chr13_53424812_53425257,chr13_53424812_53425257,chr13_53424812_53425257,chr13_53424812_5342…	ALDH1A2,ALX1,ASCL2,COBL,GATA3,HAND2,HOXC11,HOXD10,HOXD9,IRX5,ISL1,LHX1,MEF2C,NKX2-6,PAX5,PAX6,PBX1,PCDH8,PITX2,PRDM14,SATB2,SFRP1,SHOX2,T,TFAP2A,TWIST1
GO Biological Process	GO:0030326	embryonic limb morphogenesis	355	7.79856e-12	1.00625e-07	2.8345e-10	19.6525	56	24	1.48873e-11	1.9209e-07	8.00377e-09	1.19133	14	127	chr12_54367250_54367822,chr12_85673860_85674531,chr15_58357319_58357989,chr1_165204410_165205003,chr2_175192666_175194079,chr2_175199646_175200844,chr2_176971304_176972812,chr2_176971304_176972812,chr2_176986956_176987918,chr3_157812226_157812763,chr3_157812226_157812763,chr3_157812226_157812763,chr3_157812226_157812763,chr3_157812226_157812763,chr3_157812226_157812763,chr3_157812226_157812763,ch…	ALDH1A2,ALX1,HAND2,HOXA10,HOXC11,HOXD10,HOXD9,PBX1,PITX2,SHOX2,SP8,SP9,TFAP2A,TWIST1
GO Biological Process	GO:0048665	neuron fate specification	150	2.63175e-103	3.39574e-99	2.26383e-101	6.61644	117	23	1.45203e-11	1.87355e-07	8.14588e-09	0.309559	9	33	chr11_20184487_20184718,chr11_20184487_20184718,chr11_20184487_20184718,chr11_20184487_20184718,chr11_20184487_20184718,chr11_20184487_20184718,chr11_20184487_20184718,chr11_20184487_20184718,chr11_20184487_20184718,chr11_20184487_20184718,chr11_20184487_20184718,chr11_20184487_20184718,chr11_20184487_20184718,chr11_20184487_20184718,chr11_20184487_20184718,chr11_20184487_20184718,chr11_20184487_…	ATOH1,DBX1,HOXD10,ISL1,NKX6-1,PAX6,POU4F1,SOX1,TLX3
GO Biological Process	GO:0009792	embryo development ending in birth or egg hatching	219	4.82212e-59	6.22198e-55	2.84109e-57	62.571	217	25	1.6298e-11	2.10294e-07	8.41174e-09	5.25311	26	560	chr10_8094093_8097331,chr11_2290953_2292914,chr11_31838674_31839947,chr12_54367250_54367822,chr12_85673860_85674531,chr13_53424812_53425257,chr13_53424812_53425257,chr13_53424812_53425257,chr13_53424812_53425257,chr13_53424812_53425257,chr13_53424812_53425257,chr13_53424812_53425257,chr13_53424812_53425257,chr13_53424812_53425257,chr13_53424812_53425257,chr13_53424812_53425257,chr13_53424812_5342…	ALDH1A2,ALX1,ASCL2,COBL,GATA3,HAND2,HOXC11,HOXD10,HOXD9,IRX5,ISL1,LHX1,MEF2C,NKX2-6,PAX5,PAX6,PBX1,PCDH8,PITX2,PRDM14,SATB2,SFRP1,SHOX2,T,TFAP2A,TWIST1
GO Biological Process	GO:0030900	forebrain development	178	8.18263e-86	1.0558e-81	5.93149e-84	55.5555	242	26	3.06936e-11	3.9604e-07	1.52323e-08	3.40514	21	363	chr10_119301464_119302540,chr11_111848326_111848400,chr11_111848326_111848400,chr11_111848326_111848400,chr11_31838674_31839947,chr13_112720927_112721425,chr13_112720927_112721425,chr13_112720927_112721425,chr13_112720927_112721425,chr13_112720927_112721425,chr13_112720927_112721425,chr13_112720927_112721425,chr13_112720927_112721425,chr13_112720927_112721425,chr13_112720927_112721425,chr13_11272…	ALDH1A2,ATOH1,CNTNAP2,DIXDC1,EMX2,FEZF1,FOXG1,ISL1,LHX1,LMX1A,NKX2-6,NR2E1,OTP,PAX5,PAX6,PITX2,POU4F1,SATB2,SLC4A10,SOX1,TBR1
GO Biological Process	GO:0048704	embryonic skeletal system morphogenesis	124	6.2616e-118	8.07935e-114	6.5156e-116	12.6463	158	28	6.83235e-11	8.81578e-07	3.14849e-08	0.872392	12	93	chr12_54367250_54367822,chr12_85673860_85674531,chr16_54972078_54972647,chr17_35060451_35060679,chr17_35060451_35060679,chr17_35060451_35060679,chr17_35060451_35060679,chr17_35060451_35060679,chr17_35060451_35060679,chr17_35060451_35060679,chr17_35060451_35060679,chr17_35060451_35060679,chr17_35060451_35060679,chr17_35060451_35060679,chr17_35060451_35060679,chr17_35060451_35060679,chr17_35060451_…	ALX1,HOXC11,HOXD10,HOXD9,IRX5,LHX1,MEF2C,PAX5,SATB2,SHOX2,TFAP2A,TWIST1
GO Biological Process	GO:0001708	cell fate specification	194	3.04206e-74	3.92517e-70	2.02328e-72	13.3414	121	27	6.63253e-11	8.55795e-07	3.16961e-08	0.6754	11	72	chr11_20184487_20184718,chr11_20184487_20184718,chr11_20184487_20184718,chr11_20184487_20184718,chr11_20184487_20184718,chr11_20184487_20184718,chr11_20184487_20184718,chr11_20184487_20184718,chr11_20184487_20184718,chr11_20184487_20184718,chr11_20184487_20184718,chr11_20184487_20184718,chr11_20184487_20184718,chr11_20184487_20184718,chr11_20184487_20184718,chr11_20184487_20184718,chr11_20184487_…	ATOH1,DBX1,HOXD10,ISL1,NKX6-1,PAX6,POU4F1,PRDM14,SOX1,TENM4,TLX3
GO Biological Process	GO:0035108	limb morphogenesis	404	5.90696e-08	0.000762175	1.88657e-06	25.3477	56	30	1.08893e-10	1.40505e-06	4.68348e-08	1.37894	14	147	chr12_54367250_54367822,chr12_85673860_85674531,chr15_58357319_58357989,chr1_165204410_165205003,chr2_175192666_175194079,chr2_175199646_175200844,chr2_176971304_176972812,chr2_176971304_176972812,chr2_176986956_176987918,chr3_157812226_157812763,chr3_157812226_157812763,chr3_157812226_157812763,chr3_157812226_157812763,chr3_157812226_157812763,chr3_157812226_157812763,chr3_157812226_157812763,ch…	ALDH1A2,ALX1,HAND2,HOXA10,HOXC11,HOXD10,HOXD9,PBX1,PITX2,SHOX2,SP8,SP9,TFAP2A,TWIST1
GO Biological Process	GO:0035295	tube development	225	1.17837e-54	1.52045e-50	6.75754e-53	71.6902	226	32	3.34366e-10	4.31433e-06	1.34823e-07	5.13117	24	547	chr10_8094093_8097331,chr11_31838674_31839947,chr12_85673860_85674531,chr13_28493404_28494996,chr13_79170146_79170959,chr15_58357319_58357989,chr16_84853380_84853871,chr16_84853380_84853871,chr17_35060451_35060679,chr17_35060451_35060679,chr17_35060451_35060679,chr17_35060451_35060679,chr17_35060451_35060679,chr17_35060451_35060679,chr17_35060451_35060679,chr17_35060451_35060679,chr17_35060451_35…	ALDH1A2,ALX1,COBL,CRISPLD2,EDNRB,EPHA7,GATA3,GATA4,HAND2,HOXD11,IRX2,LHX1,MEF2C,NKX2-6,PAX6,PBX1,PDX1,PITX2,SFRP1,SHOX2,SIM1,T,TBX20,TWIST1
GO Biological Process	GO:0048863	stem cell differentiation	409	1.49197e-07	0.00192508	4.70681e-06	22.0833	50	34	4.09818e-10	5.28789e-06	1.55526e-07	1.257	13	134	chr12_85673860_85674531,chr13_28493404_28494996,chr13_79170146_79170959,chr13_95363371_95364915,chr15_58357319_58357989,chr1_26735245_26736154,chr1_26735245_26736154,chr1_26735245_26736154,chr1_26735245_26736154,chr1_26735245_26736154,chr1_26735245_26736154,chr1_26735245_26736154,chr1_26735245_26736154,chr4_111543401_111544463,chr4_111543401_111544463,chr4_111543401_111544463,chr4_111543401_11154…	ALDH1A2,ALX1,EDNRB,HAND2,ISL1,LIN28A,MEF2C,PDX1,PITX2,SFRP1,SOX21,T,TWIST1
GO Biological Process	GO:0001501	skeletal system development	229	9.79249e-54	1.26353e-49	5.51758e-52	56.8222	198	35	4.77491e-10	6.16107e-06	1.7603e-07	4.36196	22	465	chr12_54367250_54367822,chr12_54447807_54448769,chr12_54447807_54448769,chr12_54447807_54448769,chr12_85673860_85674531,chr16_54972078_54972647,chr17_35060451_35060679,chr17_35060451_35060679,chr17_35060451_35060679,chr17_35060451_35060679,chr17_35060451_35060679,chr17_35060451_35060679,chr17_35060451_35060679,chr17_35060451_35060679,chr17_35060451_35060679,chr17_35060451_35060679,chr17_35060451_…	ALX1,ENSG00000273266,HAND2,HOXA10,HOXA13,HOXC11,HOXC4,HOXD10,HOXD8,HOXD9,IRX5,LHX1,MEF2C,PAX5,PBX1,PITX2,SATB2,SFRP1,SHOX2,T,TFAP2A,TWIST1
GO Biological Process	GO:0048729	tissue morphogenesis	224	8.73932e-55	1.12763e-50	5.03408e-53	65.273	215	36	4.92754e-10	6.358e-06	1.76611e-07	4.79347	23	511	chr10_8094093_8097331,chr12_85673860_85674531,chr13_28493404_28494996,chr13_53424812_53425257,chr13_53424812_53425257,chr13_53424812_53425257,chr13_53424812_53425257,chr13_53424812_53425257,chr13_53424812_53425257,chr13_53424812_53425257,chr13_53424812_53425257,chr13_53424812_53425257,chr13_53424812_53425257,chr13_53424812_53425257,chr13_53424812_53425257,chr13_53424812_53425257,chr13_53424812_53…	ALDH1A2,ALX1,COBL,EPHA7,GATA3,GATA4,HAND2,HOXD11,IRX2,ISL1,LHX1,MEF2C,PBX1,PCDH8,PDX1,PITX2,POU4F1,SFRP1,SHOX2,T,TBX20,TFAP2A,TWIST1
GO Biological Process	GO:0060173	limb development	423	5.97951e-07	0.00771536	1.82396e-05	27.2868	56	39	9.51824e-10	1.22814e-05	3.14907e-07	1.62284	14	173	chr12_54367250_54367822,chr12_85673860_85674531,chr15_58357319_58357989,chr1_165204410_165205003,chr2_175192666_175194079,chr2_175199646_175200844,chr2_176971304_176972812,chr2_176971304_176972812,chr2_176986956_176987918,chr3_157812226_157812763,chr3_157812226_157812763,chr3_157812226_157812763,chr3_157812226_157812763,chr3_157812226_157812763,chr3_157812226_157812763,chr3_157812226_157812763,ch…	ALDH1A2,ALX1,HAND2,HOXA10,HOXC11,HOXD10,HOXD9,PBX1,PITX2,SHOX2,SP8,SP9,TFAP2A,TWIST1
GO Biological Process	GO:0048705	skeletal system morphogenesis	190	1.66258e-76	2.14523e-72	1.12907e-74	25.738	161	40	1.25034e-09	1.61332e-05	4.03329e-07	1.96054	15	209	chr12_54367250_54367822,chr12_85673860_85674531,chr16_54972078_54972647,chr17_35060451_35060679,chr17_35060451_35060679,chr17_35060451_35060679,chr17_35060451_35060679,chr17_35060451_35060679,chr17_35060451_35060679,chr17_35060451_35060679,chr17_35060451_35060679,chr17_35060451_35060679,chr17_35060451_35060679,chr17_35060451_35060679,chr17_35060451_35060679,chr17_35060451_35060679,chr17_35060451_…	ALX1,HOXC11,HOXD10,HOXD8,HOXD9,IRX5,LHX1,MEF2C,PAX5,SATB2,SFRP1,SHOX2,T,TFAP2A,TWIST1
GO Biological Process	GO:0048666	neuron development	82	6.90278e-156	8.90666e-152	1.08618e-153	102.851	422	42	1.39256e-09	1.79682e-05	4.27813e-07	6.94161	27	740	chr10_118896363_118897280,chr10_118896363_118897280,chr10_8094093_8097331,chr11_31838674_31839947,chr11_79151719_79152112,chr11_79151719_79152112,chr11_79151719_79152112,chr13_110438256_110439234,chr13_110438256_110439234,chr13_110438256_110439234,chr13_112720927_112721425,chr13_112720927_112721425,chr13_112720927_112721425,chr13_112720927_112721425,chr13_112720927_112721425,chr13_112720927_11272…	ATOH1,CNTNAP2,COBL,CTNNA2,EPHA7,FEZF1,FOXG1,GATA3,HAND2,HOXD10,HOXD9,IRS2,IRX5,ISL1,LHX1,LMX1A,MEF2C,NR2E1,PAX6,POU4F1,POU4F2,SKOR1,SLC4A10,SOX1,TENM4,USH1G,VAX1
GO Biological Process	GO:0002009	morphogenesis of an epithelium	213	2.86586e-61	3.69781e-57	1.73606e-59	52.2937	201	43	1.5613e-09	2.01455e-05	4.68499e-07	3.80851	20	406	chr10_8094093_8097331,chr12_85673860_85674531,chr13_28493404_28494996,chr13_53424812_53425257,chr13_53424812_53425257,chr13_53424812_53425257,chr13_53424812_53425257,chr13_53424812_53425257,chr13_53424812_53425257,chr13_53424812_53425257,chr13_53424812_53425257,chr13_53424812_53425257,chr13_53424812_53425257,chr13_53424812_53425257,chr13_53424812_53425257,chr13_53424812_53425257,chr13_53424812_53…	ALDH1A2,ALX1,COBL,EPHA7,GATA3,GATA4,HAND2,HOXD11,IRX2,LHX1,MEF2C,PBX1,PCDH8,PDX1,PITX2,SFRP1,T,TBX20,TFAP2A,TWIST1
GO Biological Process	GO:0016477	cell migration	182	1.37568e-83	1.77504e-79	9.75294e-82	89.0993	302	44	1.87506e-09	2.41938e-05	5.4986e-07	7.54197	28	804	chr10_118896363_118897280,chr10_118896363_118897280,chr10_119301464_119302540,chr10_128994030_128995134,chr10_8094093_8097331,chr11_111848326_111848400,chr11_111848326_111848400,chr11_111848326_111848400,chr11_31838674_31839947,chr12_85673860_85674531,chr13_112720927_112721425,chr13_112720927_112721425,chr13_112720927_112721425,chr13_112720927_112721425,chr13_112720927_112721425,chr13_112720927_1…	ALX1,ATOH1,BARHL2,CTNNA2,DIXDC1,DOCK1,EDNRB,EMX2,FEZF1,FOXG1,GATA3,HAND2,ISL1,LHX1,MEF2C,NKX6-1,NR2E1,PAX6,PITX2,PODXL2,POU4F1,SATB2,SOX1,T,TBX20,TLX3,TWIST1,VAX1
GO Biological Process	GO:0009953	dorsal/ventral pattern formation	27	1.2629e-227	1.62952e-223	6.03527e-225	12.4398	241	45	6.94297e-09	8.95852e-05	1.99078e-06	0.797348	10	85	chr11_20184487_20184718,chr11_20184487_20184718,chr11_20184487_20184718,chr11_20184487_20184718,chr11_20184487_20184718,chr11_20184487_20184718,chr11_20184487_20184718,chr11_20184487_20184718,chr11_20184487_20184718,chr11_20184487_20184718,chr11_20184487_20184718,chr11_20184487_20184718,chr11_20184487_20184718,chr11_20184487_20184718,chr11_20184487_20184718,chr11_20184487_20184718,chr11_20184487_…	DBX1,FOXG1,HOXD11,LHX1,NKX6-1,PAX6,SFRP1,SOX1,SP8,TBX20
GO Biological Process	GO:0021517	ventral spinal cord development	15	4.1493e-270	5.35385e-266	3.56923e-267	7.92824	239	46	8.18198e-09	0.000105572	2.29504e-06	0.422125	8	45	chr11_20184487_20184718,chr11_20184487_20184718,chr11_20184487_20184718,chr11_20184487_20184718,chr11_20184487_20184718,chr11_20184487_20184718,chr11_20184487_20184718,chr11_20184487_20184718,chr11_20184487_20184718,chr11_20184487_20184718,chr11_20184487_20184718,chr11_20184487_20184718,chr11_20184487_20184718,chr11_20184487_20184718,chr11_20184487_20184718,chr11_20184487_20184718,chr11_20184487_…	DBX1,HOXD10,ISL1,LHX1,NKX6-1,PAX6,SOX1,TBX20
GO Biological Process	GO:0014033	neural crest cell differentiation	374	7.26438e-10	9.37323e-06	2.50621e-08	12.3262	39	49	1.22516e-08	0.000158083	3.22618e-06	0.628498	9	67	chr12_85673860_85674531,chr13_79170146_79170959,chr15_58357319_58357989,chr4_111543401_111544463,chr4_111543401_111544463,chr4_111543401_111544463,chr4_111543401_111544463,chr4_111543401_111544463,chr4_111543401_111544463,chr4_174443366_174443865,chr4_174443366_174443865,chr4_174443366_174443865,chr4_174443366_174443865,chr4_174443366_174443865,chr4_174443366_174443865,chr4_174443366_174443865,ch…	ALDH1A2,ALX1,EDNRB,HAND2,ISL1,MEF2C,PITX2,SFRP1,TWIST1
GO Biological Process	GO:0035239	tube morphogenesis	209	5.85849e-63	7.55921e-59	3.61684e-61	45.5934	190	48	1.22368e-08	0.000157891	3.28941e-06	3.05806	17	326	chr10_8094093_8097331,chr12_85673860_85674531,chr17_35060451_35060679,chr17_35060451_35060679,chr17_35060451_35060679,chr17_35060451_35060679,chr17_35060451_35060679,chr17_35060451_35060679,chr17_35060451_35060679,chr17_35060451_35060679,chr17_35060451_35060679,chr17_35060451_35060679,chr17_35060451_35060679,chr17_35060451_35060679,chr17_35060451_35060679,chr17_35060451_35060679,chr17_35060451_35…	ALX1,COBL,EPHA7,GATA3,GATA4,HAND2,HOXD11,IRX2,LHX1,MEF2C,PBX1,PITX2,SFRP1,SHOX2,T,TBX20,TWIST1
GO Biological Process	GO:0060562	epithelial tube morphogenesis	205	3.45198e-64	4.45408e-60	2.17272e-62	40.0577	180	50	1.4519e-08	0.000187338	3.74676e-06	2.71098	16	289	chr10_8094093_8097331,chr12_85673860_85674531,chr17_35060451_35060679,chr17_35060451_35060679,chr17_35060451_35060679,chr17_35060451_35060679,chr17_35060451_35060679,chr17_35060451_35060679,chr17_35060451_35060679,chr17_35060451_35060679,chr17_35060451_35060679,chr17_35060451_35060679,chr17_35060451_35060679,chr17_35060451_35060679,chr17_35060451_35060679,chr17_35060451_35060679,chr17_35060451_35…	ALX1,COBL,EPHA7,GATA3,GATA4,HAND2,HOXD11,IRX2,LHX1,MEF2C,PBX1,PITX2,SFRP1,T,TBX20,TWIST1
GO Biological Process	GO:0048870	cell motility	191	7.41611e-76	9.56901e-72	5.00995e-74	96.1291	302	51	2.39007e-08	0.000308391	6.04688e-06	8.48003	28	904	chr10_118896363_118897280,chr10_118896363_118897280,chr10_119301464_119302540,chr10_128994030_128995134,chr10_8094093_8097331,chr11_111848326_111848400,chr11_111848326_111848400,chr11_111848326_111848400,chr11_31838674_31839947,chr12_85673860_85674531,chr13_112720927_112721425,chr13_112720927_112721425,chr13_112720927_112721425,chr13_112720927_112721425,chr13_112720927_112721425,chr13_112720927_1…	ALX1,ATOH1,BARHL2,CTNNA2,DIXDC1,DOCK1,EDNRB,EMX2,FEZF1,FOXG1,GATA3,HAND2,ISL1,LHX1,MEF2C,NKX6-1,NR2E1,PAX6,PITX2,PODXL2,POU4F1,SATB2,SOX1,T,TBX20,TLX3,TWIST1,VAX1
GO Biological Process	GO:0021515	cell differentiation in spinal cord	14	2.14967e-272	2.77372e-268	1.98123e-269	7.75137	239	52	3.15644e-08	0.000407275	7.83221e-06	0.49717	8	53	chr11_20184487_20184718,chr11_20184487_20184718,chr11_20184487_20184718,chr11_20184487_20184718,chr11_20184487_20184718,chr11_20184487_20184718,chr11_20184487_20184718,chr11_20184487_20184718,chr11_20184487_20184718,chr11_20184487_20184718,chr11_20184487_20184718,chr11_20184487_20184718,chr11_20184487_20184718,chr11_20184487_20184718,chr11_20184487_20184718,chr11_20184487_20184718,chr11_20184487_…	DBX1,HOXD10,ISL1,LHX1,NKX6-1,PAX6,SOX1,TBX20
GO Biological Process	GO:0043388	positive regulation of DNA binding	257	3.27749e-38	4.22894e-34	1.6455e-36	6.8183	62	52	3.15644e-08	0.000407275	7.83221e-06	0.49717	8	53	chr10_8094093_8097331,chr13_28493404_28494996,chr13_79170146_79170959,chr13_79182095_79182205,chr13_79182095_79182205,chr4_111543401_111544463,chr4_111543401_111544463,chr4_111543401_111544463,chr4_111543401_111544463,chr4_111543401_111544463,chr4_111543401_111544463,chr4_147557774_147558544,chr4_147557774_147558544,chr4_147557774_147558544,chr4_147557774_147558544,chr4_147557774_147558544,chr4_1…	GATA3,HAND2,ISL1,PDX1,PITX2,POU4F1,POU4F2,TWIST1
GO Biological Process	GO:0072001	renal system development	216	1.05423e-60	1.36027e-56	6.29755e-59	40.9016	177	54	3.28296e-08	0.0004236	7.84445e-06	2.49523	15	266	chr10_119301464_119302540,chr10_8094093_8097331,chr12_54367250_54367822,chr15_58357319_58357989,chr17_35060451_35060679,chr17_35060451_35060679,chr17_35060451_35060679,chr17_35060451_35060679,chr17_35060451_35060679,chr17_35060451_35060679,chr17_35060451_35060679,chr17_35060451_35060679,chr17_35060451_35060679,chr17_35060451_35060679,chr17_35060451_35060679,chr17_35060451_35060679,chr17_35060451_…	ALDH1A2,EMX2,EPHA7,GATA3,HOXC11,HOXD11,IRX2,LHX1,MEF2C,MME,PBX1,SFRP1,SIM1,TBX18,TFAP2A
GO Biological Process	GO:0035051	cardiocyte differentiation	356	1.95667e-11	2.52469e-07	7.09184e-10	15.0393	47	56	3.74711e-08	0.00048349	8.63374e-06	0.947437	10	101	chr11_79151719_79152112,chr11_79151719_79152112,chr11_79151719_79152112,chr1_11919095_11919699,chr1_11919095_11919699,chr1_11919095_11919699,chr1_11919095_11919699,chr1_11919095_11919699,chr4_111543401_111544463,chr4_111543401_111544463,chr4_111543401_111544463,chr4_111543401_111544463,chr4_111543401_111544463,chr4_111543401_111544463,chr4_174443366_174443865,chr4_174443366_174443865,chr4_1744433…	GATA4,HAND2,ISL1,MEF2C,NKX2-6,NPPB,PITX2,T,TENM4,TWIST1
GO Molecular Function	GO:0003682	chromatin binding	26	2.54974e-81	1.06375e-77	4.09135e-79	47.9585	220	17	5.51319e-08	0.000230011	1.353e-05	4.70904	20	502	chr10_118896363_118897280,chr10_118896363_118897280,chr10_8094093_8097331,chr11_31838674_31839947,chr13_100649800_100650073,chr13_28493404_28494996,chr13_79170146_79170959,chr13_79182095_79182205,chr13_79182095_79182205,chr15_89921898_89922345,chr15_89921898_89922345,chr17_77783551_77784110,chr17_77783551_77784110,chr17_77783551_77784110,chr17_77783551_77784110,chr17_77783551_77784110,chr17_77783…	ATOH1,CBX4,GATA3,GATA4,HOXD10,ISL1,MEF2C,NKX6-1,PAX6,PDX1,PITX2,POLG,POU4F1,POU4F2,PRDM13,PRDM14,SATB2,TFAP2A,VAX1,ZIC2
GO Biological Process	GO:0007423	sensory organ development	35	3.07428e-219	3.96674e-215	1.13336e-216	65.7387	413	60	7.60346e-08	0.000981074	1.63512e-05	4.80285	20	512	chr10_118896363_118897280,chr10_118896363_118897280,chr10_8094093_8097331,chr11_31838674_31839947,chr13_112720927_112721425,chr13_112720927_112721425,chr13_112720927_112721425,chr13_112720927_112721425,chr13_112720927_112721425,chr13_112720927_112721425,chr13_112720927_112721425,chr13_112720927_112721425,chr13_112720927_112721425,chr13_112720927_112721425,chr13_112720927_112721425,chr13_112720927…	ABCB5,ALDH1A2,ATOH1,FOXE3,FOXG1,GATA3,HAND2,IRX5,LHX1,NKX2-6,NR2E1,PAX6,PITX2,POU4F2,SOX1,TFAP2A,TWIST1,USH1G,VAX1,ZIC1
GO Biological Process	GO:0001709	cell fate determination	326	4.69771e-18	6.06146e-14	1.85934e-16	8.16306	43	61	8.13385e-08	0.00104951	1.72051e-05	0.375222	7	40	chr10_8094093_8097331,chr11_31838674_31839947,chr14_29234671_29237202,chr1_91172288_91172337,chr1_91172288_91172337,chr1_91172288_91172337,chr1_91172288_91172337,chr1_91172288_91172337,chr1_91172288_91172337,chr1_91172288_91172337,chr1_91172288_91172337,chr1_91172288_91172337,chr1_91172288_91172337,chr1_91172288_91172337,chr1_91172288_91172337,chr1_91172288_91172337,chr1_91172288_91172337,chr1_91…	ATOH1,BARHL2,FOXG1,GATA3,ISL1,MEF2C,PAX6
GO Biological Process	GO:0048935	peripheral nervous system neuron development	313	2.86252e-21	3.69351e-17	1.18003e-19	3.00775	31	62	8.3044e-08	0.00107152	1.72825e-05	0.121947	5	13	chr13_79170146_79170959,chr13_79182095_79182205,chr13_79182095_79182205,chr2_176971304_176972812,chr2_176971304_176972812,chr2_176986956_176987918,chr4_174443366_174443865,chr4_174443366_174443865,chr4_174443366_174443865,chr4_174443366_174443865,chr4_174443366_174443865,chr4_174443366_174443865,chr4_174443366_174443865,chr4_174443366_174443865,chr4_174443366_174443865,chr4_174443366_174443865,ch…	HAND2,HOXD10,HOXD9,ISL1,POU4F1
GO Biological Process	GO:0021872	forebrain generation of neurons	251	1.04507e-39	1.34846e-35	5.37235e-38	12.6386	82	65	1.27361e-07	0.00164334	2.52821e-05	0.590975	8	63	chr11_31838674_31839947,chr13_112720927_112721425,chr13_112720927_112721425,chr13_112720927_112721425,chr13_112720927_112721425,chr13_112720927_112721425,chr13_112720927_112721425,chr13_112720927_112721425,chr13_112720927_112721425,chr13_112720927_112721425,chr13_112720927_112721425,chr13_112720927_112721425,chr13_112720927_112721425,chr13_112720927_112721425,chr13_112720927_112721425,chr13_11272…	FOXG1,NR2E1,OTP,PAX6,SATB2,SLC4A10,SOX1,TBR1
GO Biological Process	GO:0001655	urogenital system development	226	1.24016e-54	1.60018e-50	7.08042e-53	45.1587	177	66	1.51891e-07	0.00195985	2.96946e-05	2.80479	15	299	chr10_119301464_119302540,chr10_8094093_8097331,chr12_54367250_54367822,chr15_58357319_58357989,chr17_35060451_35060679,chr17_35060451_35060679,chr17_35060451_35060679,chr17_35060451_35060679,chr17_35060451_35060679,chr17_35060451_35060679,chr17_35060451_35060679,chr17_35060451_35060679,chr17_35060451_35060679,chr17_35060451_35060679,chr17_35060451_35060679,chr17_35060451_35060679,chr17_35060451_…	ALDH1A2,EMX2,EPHA7,GATA3,HOXC11,HOXD11,IRX2,LHX1,MEF2C,MME,PBX1,SFRP1,SIM1,TBX18,TFAP2A
GO Biological Process	GO:0007409	axonogenesis	236	1.72906e-47	2.231e-43	9.45339e-46	54.7339	184	67	1.61742e-07	0.00208696	3.11486e-05	3.22691	16	344	chr10_118896363_118897280,chr10_118896363_118897280,chr10_8094093_8097331,chr11_31838674_31839947,chr13_110438256_110439234,chr13_110438256_110439234,chr13_110438256_110439234,chr13_79170146_79170959,chr13_79182095_79182205,chr13_79182095_79182205,chr14_29234671_29237202,chr17_35060451_35060679,chr17_35060451_35060679,chr17_35060451_35060679,chr17_35060451_35060679,chr17_35060451_35060679,chr17_3…	ATOH1,COBL,CTNNA2,EPHA7,FEZF1,FOXG1,GATA3,IRS2,ISL1,LHX1,LMX1A,NR2E1,PAX6,POU4F1,POU4F2,VAX1
GO Biological Process	GO:0048667	cell morphogenesis involved in neuron differentiation	244	2.21477e-42	2.85772e-38	1.1712e-40	60.8351	186	68	1.83659e-07	0.00236975	3.48493e-05	3.68656	17	393	chr10_118896363_118897280,chr10_118896363_118897280,chr10_8094093_8097331,chr11_31838674_31839947,chr13_110438256_110439234,chr13_110438256_110439234,chr13_110438256_110439234,chr13_79170146_79170959,chr13_79182095_79182205,chr13_79182095_79182205,chr14_29234671_29237202,chr17_35060451_35060679,chr17_35060451_35060679,chr17_35060451_35060679,chr17_35060451_35060679,chr17_35060451_35060679,chr17_3…	ATOH1,COBL,CTNNA2,EPHA7,FEZF1,FOXG1,GATA3,IRS2,ISL1,LHX1,LMX1A,MEF2C,NR2E1,PAX6,POU4F1,POU4F2,VAX1
GO Molecular Function	GO:0033613	activating transcription factor binding	45	4.20206e-15	1.7531e-11	3.89578e-13	8.19416	39	18	1.84418e-07	0.000769394	4.27441e-05	0.619117	8	66	chr1_116380946_116381475,chr1_116380946_116381475,chr4_111543401_111544463,chr4_111543401_111544463,chr4_111543401_111544463,chr4_111543401_111544463,chr4_111543401_111544463,chr4_111543401_111544463,chr4_174443366_174443865,chr4_174443366_174443865,chr4_174443366_174443865,chr4_174443366_174443865,chr4_174443366_174443865,chr4_174443366_174443865,chr4_174443366_174443865,chr4_174443366_174443865…	GATA4,HAND2,ISL1,MEF2C,NHLH2,PITX2,T,TBX20
GO Biological Process	GO:0000902	cell morphogenesis	289	1.46669e-26	1.89247e-22	6.54835e-25	85.3442	192	69	3.41953e-07	0.00441222	6.39452e-05	5.77843	21	616	chr10_118896363_118897280,chr10_118896363_118897280,chr10_8094093_8097331,chr11_31838674_31839947,chr11_79151719_79152112,chr11_79151719_79152112,chr11_79151719_79152112,chr13_110438256_110439234,chr13_110438256_110439234,chr13_110438256_110439234,chr13_79170146_79170959,chr13_79182095_79182205,chr13_79182095_79182205,chr14_29234671_29237202,chr17_35060451_35060679,chr17_35060451_35060679,chr17_3…	ATOH1,CNTNAP2,COBL,CTNNA2,EPHA7,FEZF1,FOXG1,GATA3,IRS2,ISL1,LHX1,LMX1A,MEF2C,NR2E1,PAX6,POU4F1,POU4F2,PRDM14,SHROOM1,TENM4,VAX1
GO Biological Process	GO:0021510	spinal cord development	37	2.33477e-213	3.01255e-209	8.14203e-211	14.3391	241	70	3.51654e-07	0.00453739	6.48198e-05	0.919295	9	98	chr11_20184487_20184718,chr11_20184487_20184718,chr11_20184487_20184718,chr11_20184487_20184718,chr11_20184487_20184718,chr11_20184487_20184718,chr11_20184487_20184718,chr11_20184487_20184718,chr11_20184487_20184718,chr11_20184487_20184718,chr11_20184487_20184718,chr11_20184487_20184718,chr11_20184487_20184718,chr11_20184487_20184718,chr11_20184487_20184718,chr11_20184487_20184718,chr11_20184487_…	DBX1,HOXD10,ISL1,LHX1,NKX6-1,PAX6,SOX1,TBX20,ZIC1
GO Biological Process	GO:0021879	forebrain neuron differentiation	247	2.36174e-41	3.04735e-37	1.23375e-39	11.3089	80	71	4.6313e-07	0.00597577	8.41658e-05	0.478409	7	51	chr11_31838674_31839947,chr13_112720927_112721425,chr13_112720927_112721425,chr13_112720927_112721425,chr13_112720927_112721425,chr13_112720927_112721425,chr13_112720927_112721425,chr13_112720927_112721425,chr13_112720927_112721425,chr13_112720927_112721425,chr13_112720927_112721425,chr13_112720927_112721425,chr13_112720927_112721425,chr13_112720927_112721425,chr13_112720927_112721425,chr13_11272…	FOXG1,OTP,PAX6,SATB2,SLC4A10,SOX1,TBR1
GO Biological Process	GO:0061564	axon development	243	2.33271e-43	3.0099e-39	1.23864e-41	58.684	184	72	4.80041e-07	0.00619397	8.60273e-05	3.49895	16	373	chr10_118896363_118897280,chr10_118896363_118897280,chr10_8094093_8097331,chr11_31838674_31839947,chr13_110438256_110439234,chr13_110438256_110439234,chr13_110438256_110439234,chr13_79170146_79170959,chr13_79182095_79182205,chr13_79182095_79182205,chr14_29234671_29237202,chr17_35060451_35060679,chr17_35060451_35060679,chr17_35060451_35060679,chr17_35060451_35060679,chr17_35060451_35060679,chr17_3…	ATOH1,COBL,CTNNA2,EPHA7,FEZF1,FOXG1,GATA3,IRS2,ISL1,LHX1,LMX1A,NR2E1,PAX6,POU4F1,POU4F2,VAX1
GO Biological Process	GO:0090596	sensory organ morphogenesis	19	2.71965e-249	3.50916e-245	1.84693e-246	36.313	358	74	5.87699e-07	0.00758308	0.000102474	2.30762	13	246	chr10_8094093_8097331,chr11_31838674_31839947,chr13_112720927_112721425,chr13_112720927_112721425,chr13_112720927_112721425,chr13_112720927_112721425,chr13_112720927_112721425,chr13_112720927_112721425,chr13_112720927_112721425,chr13_112720927_112721425,chr13_112720927_112721425,chr13_112720927_112721425,chr13_112720927_112721425,chr13_112720927_112721425,chr13_112720927_112721425,chr13_112720927…	ATOH1,FOXE3,FOXG1,GATA3,IRX5,LHX1,PAX6,PITX2,SOX1,TFAP2A,TWIST1,USH1G,ZIC1
GO Biological Process	GO:0001822	kidney development	207	4.74484e-64	6.12226e-60	2.95762e-62	37.8619	175	75	7.05379e-07	0.0091015	0.000121353	2.34514	13	250	chr10_8094093_8097331,chr12_54367250_54367822,chr15_58357319_58357989,chr17_35060451_35060679,chr17_35060451_35060679,chr17_35060451_35060679,chr17_35060451_35060679,chr17_35060451_35060679,chr17_35060451_35060679,chr17_35060451_35060679,chr17_35060451_35060679,chr17_35060451_35060679,chr17_35060451_35060679,chr17_35060451_35060679,chr17_35060451_35060679,chr17_35060451_35060679,chr17_35060451_35…	ALDH1A2,EPHA7,GATA3,HOXC11,HOXD11,IRX2,LHX1,MEF2C,MME,PBX1,SFRP1,SIM1,TFAP2A
GO Biological Process	GO:0003215	cardiac right ventricle morphogenesis	335	2.04838e-15	2.64302e-11	7.88961e-14	4.23551	29	76	7.16813e-07	0.00924904	0.000121698	0.178231	5	19	chr10_8094093_8097331,chr4_174443366_174443865,chr4_174443366_174443865,chr4_174443366_174443865,chr4_174443366_174443865,chr4_174443366_174443865,chr4_174443366_174443865,chr4_174443366_174443865,chr4_174443366_174443865,chr4_174443366_174443865,chr4_174443366_174443865,chr4_174443366_174443865,chr4_174443366_174443865,chr4_174443366_174443865,chr4_174443366_174443865,chr4_174443366_174443865,ch…	GATA3,GATA4,HAND2,ISL1,TBX20
GO Biological Process	GO:0048812	neuron projection morphogenesis	264	8.14411e-36	1.05084e-31	3.98044e-34	67.6212	185	78	8.89553e-07	0.0114779	0.000147153	4.12745	17	440	chr10_118896363_118897280,chr10_118896363_118897280,chr10_8094093_8097331,chr11_31838674_31839947,chr13_110438256_110439234,chr13_110438256_110439234,chr13_110438256_110439234,chr13_79170146_79170959,chr13_79182095_79182205,chr13_79182095_79182205,chr14_29234671_29237202,chr17_35060451_35060679,chr17_35060451_35060679,chr17_35060451_35060679,chr17_35060451_35060679,chr17_35060451_35060679,chr17_3…	ATOH1,CNTNAP2,COBL,CTNNA2,EPHA7,FEZF1,FOXG1,GATA3,IRS2,ISL1,LHX1,LMX1A,NR2E1,PAX6,POU4F1,POU4F2,VAX1
GO Biological Process	GO:0032989	cellular component morphogenesis	298	9.26937e-24	1.19603e-19	4.01351e-22	91.6243	194	79	9.0162e-07	0.0116336	0.000147261	6.66958	22	711	chr10_118896363_118897280,chr10_118896363_118897280,chr10_8094093_8097331,chr11_31838674_31839947,chr11_79151719_79152112,chr11_79151719_79152112,chr11_79151719_79152112,chr13_110438256_110439234,chr13_110438256_110439234,chr13_110438256_110439234,chr13_79170146_79170959,chr13_79182095_79182205,chr13_79182095_79182205,chr14_29234671_29237202,chr17_35060451_35060679,chr17_35060451_35060679,chr17_3…	ATOH1,CASQ2,CNTNAP2,COBL,CTNNA2,EPHA7,FEZF1,FOXG1,GATA3,IRS2,ISL1,LHX1,LMX1A,MEF2C,NR2E1,PAX6,POU4F1,POU4F2,PRDM14,SHROOM1,TENM4,VAX1
GO Biological Process	GO:0001755	neural crest cell migration	338	6.46621e-15	8.34335e-11	2.46845e-13	6.6622	35	80	9.63892e-07	0.0124371	0.000155464	0.3377	6	36	chr12_85673860_85674531,chr13_79170146_79170959,chr4_111543401_111544463,chr4_111543401_111544463,chr4_111543401_111544463,chr4_111543401_111544463,chr4_111543401_111544463,chr4_111543401_111544463,chr4_174443366_174443865,chr4_174443366_174443865,chr4_174443366_174443865,chr4_174443366_174443865,chr4_174443366_174443865,chr4_174443366_174443865,chr4_174443366_174443865,chr4_174443366_174443865,c…	ALX1,EDNRB,HAND2,ISL1,PITX2,TWIST1
GO Biological Process	GO:0048858	cell projection morphogenesis	265	1.8083e-35	2.33325e-31	8.80471e-34	68.0456	185	81	1.13895e-06	0.0146959	0.00018143	4.20249	17	448	chr10_118896363_118897280,chr10_118896363_118897280,chr10_8094093_8097331,chr11_31838674_31839947,chr13_110438256_110439234,chr13_110438256_110439234,chr13_110438256_110439234,chr13_79170146_79170959,chr13_79182095_79182205,chr13_79182095_79182205,chr14_29234671_29237202,chr17_35060451_35060679,chr17_35060451_35060679,chr17_35060451_35060679,chr17_35060451_35060679,chr17_35060451_35060679,chr17_3…	ATOH1,CNTNAP2,COBL,CTNNA2,EPHA7,FEZF1,FOXG1,GATA3,IRS2,ISL1,LHX1,LMX1A,NR2E1,PAX6,POU4F1,POU4F2,VAX1
GO Biological Process	GO:0014032	neural crest cell development	378	2.03063e-09	2.62013e-05	6.93155e-08	11.1674	36	82	1.28131e-06	0.0165327	0.000201618	0.553453	7	59	chr12_85673860_85674531,chr13_79170146_79170959,chr15_58357319_58357989,chr4_111543401_111544463,chr4_111543401_111544463,chr4_111543401_111544463,chr4_111543401_111544463,chr4_111543401_111544463,chr4_111543401_111544463,chr4_174443366_174443865,chr4_174443366_174443865,chr4_174443366_174443865,chr4_174443366_174443865,chr4_174443366_174443865,chr4_174443366_174443865,chr4_174443366_174443865,ch…	ALDH1A2,ALX1,EDNRB,HAND2,ISL1,PITX2,TWIST1
GO Biological Process	GO:0007411	axon guidance	210	6.12544e-62	7.90365e-58	3.76364e-60	39.6334	176	83	1.40184e-06	0.0180879	0.000217927	2.10125	12	224	chr10_118896363_118897280,chr10_118896363_118897280,chr10_8094093_8097331,chr11_31838674_31839947,chr13_110438256_110439234,chr13_110438256_110439234,chr13_110438256_110439234,chr14_29234671_29237202,chr17_35060451_35060679,chr17_35060451_35060679,chr17_35060451_35060679,chr17_35060451_35060679,chr17_35060451_35060679,chr17_35060451_35060679,chr17_35060451_35060679,chr17_35060451_35060679,chr17_3…	ATOH1,EPHA7,FEZF1,FOXG1,GATA3,IRS2,ISL1,LHX1,LMX1A,PAX6,POU4F2,VAX1
GO Biological Process	GO:0003007	heart morphogenesis	484	0.000174512	1	0.00465232	31.9542	54	83	1.40184e-06	0.0180879	0.000217927	2.10125	12	224	chr10_8094093_8097331,chr13_79170146_79170959,chr13_79182095_79182205,chr13_79182095_79182205,chr15_58357319_58357989,chr3_157812226_157812763,chr3_157812226_157812763,chr3_157812226_157812763,chr3_157812226_157812763,chr3_157812226_157812763,chr3_157812226_157812763,chr3_157812226_157812763,chr3_157812226_157812763,chr3_157812226_157812763,chr3_157823158_157823817,chr4_111543401_111544463,chr4_1…	ALDH1A2,GATA3,GATA4,HAND2,ISL1,MEF2C,PITX2,POU4F1,SHOX2,T,TBX20,TWIST1
GO Biological Process	GO:0097485	neuron projection guidance	211	1.02346e-61	1.32057e-57	6.25865e-60	39.776	176	85	1.53875e-06	0.0198545	0.000233582	2.12001	12	226	chr10_118896363_118897280,chr10_118896363_118897280,chr10_8094093_8097331,chr11_31838674_31839947,chr13_110438256_110439234,chr13_110438256_110439234,chr13_110438256_110439234,chr14_29234671_29237202,chr17_35060451_35060679,chr17_35060451_35060679,chr17_35060451_35060679,chr17_35060451_35060679,chr17_35060451_35060679,chr17_35060451_35060679,chr17_35060451_35060679,chr17_35060451_35060679,chr17_3…	ATOH1,EPHA7,FEZF1,FOXG1,GATA3,IRS2,ISL1,LHX1,LMX1A,PAX6,POU4F2,VAX1
GO Biological Process	GO:2000679	positive regulation of transcription regulatory region DNA binding	241	1.44519e-44	1.86472e-40	7.73744e-43	3.54295	54	86	1.58676e-06	0.020474	0.000238069	0.206372	5	22	chr10_8094093_8097331,chr13_79170146_79170959,chr13_79182095_79182205,chr13_79182095_79182205,chr4_147557774_147558544,chr4_147557774_147558544,chr4_147557774_147558544,chr4_147557774_147558544,chr4_147557774_147558544,chr4_147557774_147558544,chr4_147557774_147558544,chr4_147557774_147558544,chr4_147557774_147558544,chr4_147557774_147558544,chr4_147557774_147558544,chr4_147557774_147558544,chr4_…	GATA3,HAND2,POU4F1,POU4F2,TWIST1
GO Biological Process	GO:0008284	positive regulation of cell proliferation	159	4.41208e-95	5.69291e-91	3.58044e-93	86.9874	315	87	1.61639e-06	0.0208562	0.000239727	8.03914	24	857	chr10_100993108_100993938,chr11_31838674_31839947,chr13_110438256_110439234,chr13_110438256_110439234,chr13_110438256_110439234,chr13_28493404_28494996,chr13_79170146_79170959,chr14_29234671_29237202,chr15_58357319_58357989,chr15_83952420_83954395,chr17_35060451_35060679,chr17_35060451_35060679,chr17_35060451_35060679,chr17_35060451_35060679,chr17_35060451_35060679,chr17_35060451_35060679,chr17_3…	ALDH1A2,BNC1,CBX8,EDNRB,FOXE3,FOXG1,HPSE2,IRS2,ISL1,LHX1,LIN28A,MEF2C,NKX2-6,NR2E1,OTP,PAX6,PBX1,PDX1,PITX2,SFRP1,SHOX2,T,TBX20,TWIST1
GO Biological Process	GO:0035136	forelimb morphogenesis	481	0.00016283	1	0.00436797	6.57938	18	90	1.84137e-06	0.0237592	0.000263992	0.375222	6	40	chr15_58357319_58357989,chr2_176971304_176972812,chr2_176971304_176972812,chr2_176986956_176987918,chr3_157812226_157812763,chr3_157812226_157812763,chr3_157812226_157812763,chr3_157812226_157812763,chr3_157812226_157812763,chr3_157812226_157812763,chr3_157812226_157812763,chr3_157812226_157812763,chr3_157812226_157812763,chr3_157823158_157823817,chr6_10404084_10404967,chr6_10404084_10404967,chr7…	ALDH1A2,HOXD10,HOXD9,SHOX2,TFAP2A,TWIST1
GO Biological Process	GO:0003206	cardiac chamber morphogenesis	386	5.69974e-09	7.35438e-05	1.90528e-07	19.8358	50	91	1.95908e-06	0.025278	0.00027778	1.12567	9	120	chr10_8094093_8097331,chr13_79170146_79170959,chr13_79182095_79182205,chr13_79182095_79182205,chr3_157812226_157812763,chr3_157812226_157812763,chr3_157812226_157812763,chr3_157812226_157812763,chr3_157812226_157812763,chr3_157812226_157812763,chr3_157812226_157812763,chr3_157812226_157812763,chr3_157812226_157812763,chr3_157823158_157823817,chr4_111543401_111544463,chr4_111543401_111544463,chr4_…	GATA3,GATA4,HAND2,ISL1,MEF2C,PITX2,POU4F1,SHOX2,TBX20
GO Biological Process	GO:0014031	mesenchymal cell development	383	5.21926e-09	6.73441e-05	1.75833e-07	11.5908	36	92	2.01355e-06	0.0259808	0.0002824	0.590975	7	63	chr12_85673860_85674531,chr13_79170146_79170959,chr15_58357319_58357989,chr4_111543401_111544463,chr4_111543401_111544463,chr4_111543401_111544463,chr4_111543401_111544463,chr4_111543401_111544463,chr4_111543401_111544463,chr4_174443366_174443865,chr4_174443366_174443865,chr4_174443366_174443865,chr4_174443366_174443865,chr4_174443366_174443865,chr4_174443366_174443865,chr4_174443366_174443865,ch…	ALDH1A2,ALX1,EDNRB,HAND2,ISL1,PITX2,TWIST1
GO Biological Process	GO:0048864	stem cell development	388	1.1639e-08	0.000150177	3.87055e-07	11.9689	36	92	2.01355e-06	0.0259808	0.0002824	0.590975	7	63	chr12_85673860_85674531,chr13_79170146_79170959,chr15_58357319_58357989,chr4_111543401_111544463,chr4_111543401_111544463,chr4_111543401_111544463,chr4_111543401_111544463,chr4_111543401_111544463,chr4_111543401_111544463,chr4_174443366_174443865,chr4_174443366_174443865,chr4_174443366_174443865,chr4_174443366_174443865,chr4_174443366_174443865,chr4_174443366_174443865,chr4_174443366_174443865,ch…	ALDH1A2,ALX1,EDNRB,HAND2,ISL1,PITX2,TWIST1
GO Biological Process	GO:0003170	heart valve development	455	1.50149e-05	0.193737	0.000425795	7.63491	22	95	2.14036e-06	0.027617	0.000290705	0.384603	6	41	chr10_8094093_8097331,chr3_157812226_157812763,chr3_157812226_157812763,chr3_157812226_157812763,chr3_157812226_157812763,chr3_157812226_157812763,chr3_157812226_157812763,chr3_157812226_157812763,chr3_157812226_157812763,chr3_157812226_157812763,chr3_157823158_157823817,chr4_111543401_111544463,chr4_111543401_111544463,chr4_111543401_111544463,chr4_111543401_111544463,chr4_111543401_111544463,ch…	GATA3,MEF2C,PITX2,SHOX2,TBX20,TWIST1
GO Biological Process	GO:0032990	cell part morphogenesis	270	2.81524e-34	3.6325e-30	1.34537e-32	69.5374	185	96	2.18433e-06	0.0281845	0.000293588	4.40886	17	470	chr10_118896363_118897280,chr10_118896363_118897280,chr10_8094093_8097331,chr11_31838674_31839947,chr13_110438256_110439234,chr13_110438256_110439234,chr13_110438256_110439234,chr13_79170146_79170959,chr13_79182095_79182205,chr13_79182095_79182205,chr14_29234671_29237202,chr17_35060451_35060679,chr17_35060451_35060679,chr17_35060451_35060679,chr17_35060451_35060679,chr17_35060451_35060679,chr17_3…	ATOH1,CNTNAP2,COBL,CTNNA2,EPHA7,FEZF1,FOXG1,GATA3,IRS2,ISL1,LHX1,LMX1A,NR2E1,PAX6,POU4F1,POU4F2,VAX1
GO Biological Process	GO:0021537	telencephalon development	234	5.0902e-50	6.56789e-46	2.80679e-48	36.7534	153	97	2.31251e-06	0.0298383	0.000307611	2.20443	12	235	chr10_119301464_119302540,chr11_111848326_111848400,chr11_111848326_111848400,chr11_111848326_111848400,chr11_31838674_31839947,chr14_29234671_29237202,chr17_35060451_35060679,chr17_35060451_35060679,chr17_35060451_35060679,chr17_35060451_35060679,chr17_35060451_35060679,chr17_35060451_35060679,chr17_35060451_35060679,chr17_35060451_35060679,chr17_35060451_35060679,chr17_35060451_35060679,chr17_3…	ATOH1,CNTNAP2,DIXDC1,EMX2,FEZF1,FOXG1,LHX1,LMX1A,NR2E1,PAX5,PAX6,TBR1
GO Biological Process	GO:0021521	ventral spinal cord interneuron specification	105	1.73638e-136	2.24045e-132	2.13376e-134	2.03188	103	98	2.34495e-06	0.0302569	0.000308744	0.103186	4	11	chr11_20184487_20184718,chr11_20184487_20184718,chr11_20184487_20184718,chr11_20184487_20184718,chr11_20184487_20184718,chr11_20184487_20184718,chr11_20184487_20184718,chr11_20184487_20184718,chr11_20184487_20184718,chr11_20184487_20184718,chr11_20184487_20184718,chr11_20184487_20184718,chr11_20184487_20184718,chr11_20184487_20184718,chr11_20184487_20184718,chr11_20184487_20184718,chr11_20184487_…	DBX1,NKX6-1,PAX6,SOX1
GO Biological Process	GO:0072073	kidney epithelium development	166	4.26064e-92	5.4975e-88	3.31175e-90	22.9021	170	101	2.94036e-06	0.0379395	0.000375638	1.18195	9	126	chr10_8094093_8097331,chr17_35060451_35060679,chr17_35060451_35060679,chr17_35060451_35060679,chr17_35060451_35060679,chr17_35060451_35060679,chr17_35060451_35060679,chr17_35060451_35060679,chr17_35060451_35060679,chr17_35060451_35060679,chr17_35060451_35060679,chr17_35060451_35060679,chr17_35060451_35060679,chr17_35060451_35060679,chr17_35060451_35060679,chr17_35060451_35060679,chr17_35060451_35…	EPHA7,GATA3,HOXD11,IRX2,LHX1,MEF2C,PBX1,SFRP1,SIM1
GO Biological Process	GO:0003253	cardiac neural crest cell migration involved in outflow tract morphogenesis	253	3.91287e-39	5.04878e-35	1.99556e-37	0.841548	32	103	3.22314e-06	0.0415881	0.000403768	0.0375222	3	4	chr4_111543401_111544463,chr4_111543401_111544463,chr4_111543401_111544463,chr4_111543401_111544463,chr4_111543401_111544463,chr4_111543401_111544463,chr4_174443366_174443865,chr4_174443366_174443865,chr4_174443366_174443865,chr4_174443366_174443865,chr4_174443366_174443865,chr4_174443366_174443865,chr4_174443366_174443865,chr4_174443366_174443865,chr4_174443366_174443865,chr4_174443366_174443865…	HAND2,PITX2,TWIST1
GO Biological Process	GO:0001654	eye development	137	6.77998e-112	8.74821e-108	6.38555e-110	43.0823	246	104	3.47701e-06	0.0448639	0.000431383	3.14249	14	335	chr10_118896363_118897280,chr10_118896363_118897280,chr10_8094093_8097331,chr11_31838674_31839947,chr13_112720927_112721425,chr13_112720927_112721425,chr13_112720927_112721425,chr13_112720927_112721425,chr13_112720927_112721425,chr13_112720927_112721425,chr13_112720927_112721425,chr13_112720927_112721425,chr13_112720927_112721425,chr13_112720927_112721425,chr13_112720927_112721425,chr13_112720927…	ABCB5,ALDH1A2,FOXE3,GATA3,IRX5,LHX1,NR2E1,PAX6,PITX2,POU4F2,SOX1,TFAP2A,TWIST1,VAX1
GO Biological Process	GO:0043010	camera-type eye development	120	1.1052e-122	1.42604e-118	1.18837e-120	38.0125	245	105	3.67214e-06	0.0473817	0.000451254	2.72036	13	290	chr10_118896363_118897280,chr10_118896363_118897280,chr10_8094093_8097331,chr11_31838674_31839947,chr13_112720927_112721425,chr13_112720927_112721425,chr13_112720927_112721425,chr13_112720927_112721425,chr13_112720927_112721425,chr13_112720927_112721425,chr13_112720927_112721425,chr13_112720927_112721425,chr13_112720927_112721425,chr13_112720927_112721425,chr13_112720927_112721425,chr13_112720927…	ALDH1A2,FOXE3,GATA3,IRX5,LHX1,NR2E1,PAX6,PITX2,POU4F2,SOX1,TFAP2A,TWIST1,VAX1
GO Biological Process	GO:0048701	embryonic cranial skeleton morphogenesis	109	3.9536e-133	5.10133e-129	4.68012e-131	6.76962	140	107	3.75866e-06	0.048498	0.000453253	0.422125	6	45	chr16_54972078_54972647,chr17_35060451_35060679,chr17_35060451_35060679,chr17_35060451_35060679,chr17_35060451_35060679,chr17_35060451_35060679,chr17_35060451_35060679,chr17_35060451_35060679,chr17_35060451_35060679,chr17_35060451_35060679,chr17_35060451_35060679,chr17_35060451_35060679,chr17_35060451_35060679,chr17_35060451_35060679,chr17_35060451_35060679,chr17_35060451_35060679,chr17_35060451_…	IRX5,LHX1,MEF2C,PAX5,TFAP2A,TWIST1
GO Biological Process	GO:0000904	cell morphogenesis involved in differentiation	267	1.73556e-34	2.2394e-30	8.38726e-33	69.8989	186	109	3.9228e-06	0.0506159	0.000464366	4.60586	17	491	chr10_118896363_118897280,chr10_118896363_118897280,chr10_8094093_8097331,chr11_31838674_31839947,chr13_110438256_110439234,chr13_110438256_110439234,chr13_110438256_110439234,chr13_79170146_79170959,chr13_79182095_79182205,chr13_79182095_79182205,chr14_29234671_29237202,chr17_35060451_35060679,chr17_35060451_35060679,chr17_35060451_35060679,chr17_35060451_35060679,chr17_35060451_35060679,chr17_3…	ATOH1,COBL,CTNNA2,EPHA7,FEZF1,FOXG1,GATA3,IRS2,ISL1,LHX1,LMX1A,MEF2C,NR2E1,PAX6,POU4F1,POU4F2,VAX1
GO Biological Process	GO:0003208	cardiac ventricle morphogenesis	411	1.69182e-07	0.00218295	5.31132e-06	12.1939	34	111	4.9945e-06	0.064444	0.000580577	0.6754	7	72	chr10_8094093_8097331,chr13_79170146_79170959,chr13_79182095_79182205,chr13_79182095_79182205,chr4_174443366_174443865,chr4_174443366_174443865,chr4_174443366_174443865,chr4_174443366_174443865,chr4_174443366_174443865,chr4_174443366_174443865,chr4_174443366_174443865,chr4_174443366_174443865,chr4_174443366_174443865,chr4_174443366_174443865,chr4_174443366_174443865,chr4_174443366_174443865,chr4_…	GATA3,GATA4,HAND2,ISL1,MEF2C,POU4F1,TBX20
GO Biological Process	GO:0045597	positive regulation of cell differentiation	308	9.26822e-22	1.19588e-17	3.88272e-20	108.731	212	114	6.78317e-06	0.0875232	0.000767748	8.14233	23	868	chr10_128994030_128995134,chr10_8094093_8097331,chr11_31838674_31839947,chr11_79151719_79152112,chr11_79151719_79152112,chr11_79151719_79152112,chr12_85673860_85674531,chr13_79170146_79170959,chr13_79182095_79182205,chr13_79182095_79182205,chr14_29234671_29237202,chr15_68120757_68121563,chr17_35060451_35060679,chr17_35060451_35060679,chr17_35060451_35060679,chr17_35060451_35060679,chr17_35060451_…	ALX1,ATOH1,COBL,CTNNA2,DOCK1,FEZF1,FOXG1,GATA3,GATA4,ISL1,LHX1,LIN28A,MEF2C,NKX6-1,OTP,PAX6,PIAS1,POU4F1,POU4F2,SFRP1,SHOX2,TENM4,TWIST1
GO Biological Process	GO:0048593	camera-type eye morphogenesis	73	2.96963e-161	3.83171e-157	5.24892e-159	17.5188	215	115	8.66513e-06	0.111806	0.000972228	1.02248	8	109	chr11_31838674_31839947,chr13_112720927_112721425,chr13_112720927_112721425,chr13_112720927_112721425,chr13_112720927_112721425,chr13_112720927_112721425,chr13_112720927_112721425,chr13_112720927_112721425,chr13_112720927_112721425,chr13_112720927_112721425,chr13_112720927_112721425,chr13_112720927_112721425,chr13_112720927_112721425,chr13_112720927_112721425,chr13_112720927_112721425,chr13_11272…	FOXE3,IRX5,LHX1,PAX6,PITX2,SOX1,TFAP2A,TWIST1
GO Biological Process	GO:0060579	ventral spinal cord interneuron fate commitment	115	5.58544e-129	7.20689e-125	6.26686e-127	2.41094	103	116	9.41878e-06	0.12153	0.00104768	0.140708	4	15	chr11_20184487_20184718,chr11_20184487_20184718,chr11_20184487_20184718,chr11_20184487_20184718,chr11_20184487_20184718,chr11_20184487_20184718,chr11_20184487_20184718,chr11_20184487_20184718,chr11_20184487_20184718,chr11_20184487_20184718,chr11_20184487_20184718,chr11_20184487_20184718,chr11_20184487_20184718,chr11_20184487_20184718,chr11_20184487_20184718,chr11_20184487_20184718,chr11_20184487_…	DBX1,NKX6-1,PAX6,SOX1
GO Biological Process	GO:0003209	cardiac atrium morphogenesis	412	1.77357e-07	0.00228843	5.55445e-06	4.82757	20	117	9.56157e-06	0.123373	0.00105447	0.290797	5	31	chr3_157812226_157812763,chr3_157812226_157812763,chr3_157812226_157812763,chr3_157812226_157812763,chr3_157812226_157812763,chr3_157812226_157812763,chr3_157812226_157812763,chr3_157812226_157812763,chr3_157812226_157812763,chr3_157823158_157823817,chr4_111543401_111544463,chr4_111543401_111544463,chr4_111543401_111544463,chr4_111543401_111544463,chr4_111543401_111544463,chr4_111543401_111544463…	GATA4,ISL1,PITX2,SHOX2,TBX20
GO Biological Process	GO:0035115	embryonic forelimb morphogenesis	479	0.000148265	1	0.00399387	5.38177	16	118	1.12466e-05	0.145115	0.00122978	0.300178	5	32	chr15_58357319_58357989,chr2_176986956_176987918,chr3_157812226_157812763,chr3_157812226_157812763,chr3_157812226_157812763,chr3_157812226_157812763,chr3_157812226_157812763,chr3_157812226_157812763,chr3_157812226_157812763,chr3_157812226_157812763,chr3_157812226_157812763,chr3_157823158_157823817,chr6_10404084_10404967,chr6_10404084_10404967,chr7_19156902_19158378,chr7_19156902_19158378	ALDH1A2,HOXD9,SHOX2,TFAP2A,TWIST1
GO Biological Process	GO:0051101	regulation of DNA binding	296	3.16064e-24	4.07817e-20	1.37776e-22	12.4654	62	119	1.20638e-05	0.155659	0.00130806	1.06938	8	114	chr10_8094093_8097331,chr13_28493404_28494996,chr13_79170146_79170959,chr13_79182095_79182205,chr13_79182095_79182205,chr4_111543401_111544463,chr4_111543401_111544463,chr4_111543401_111544463,chr4_111543401_111544463,chr4_111543401_111544463,chr4_111543401_111544463,chr4_147557774_147558544,chr4_147557774_147558544,chr4_147557774_147558544,chr4_147557774_147558544,chr4_147557774_147558544,chr4_1…	GATA3,HAND2,ISL1,PDX1,PITX2,POU4F1,POU4F2,TWIST1
GO Biological Process	GO:0003231	cardiac ventricle development	458	1.56031e-05	0.201327	0.000439578	19.1066	40	121	1.45965e-05	0.188338	0.00155651	1.09753	8	117	chr10_8094093_8097331,chr13_79170146_79170959,chr13_79182095_79182205,chr13_79182095_79182205,chr4_111543401_111544463,chr4_111543401_111544463,chr4_111543401_111544463,chr4_111543401_111544463,chr4_111543401_111544463,chr4_111543401_111544463,chr4_174443366_174443865,chr4_174443366_174443865,chr4_174443366_174443865,chr4_174443366_174443865,chr4_174443366_174443865,chr4_174443366_174443865,chr4_…	GATA3,GATA4,HAND2,ISL1,MEF2C,PITX2,POU4F1,TBX20
GO Biological Process	GO:0003205	cardiac chamber development	440	2.58757e-06	0.0333874	7.58805e-05	24.4292	50	122	1.51011e-05	0.194849	0.00159712	1.44461	9	154	chr10_8094093_8097331,chr13_79170146_79170959,chr13_79182095_79182205,chr13_79182095_79182205,chr3_157812226_157812763,chr3_157812226_157812763,chr3_157812226_157812763,chr3_157812226_157812763,chr3_157812226_157812763,chr3_157812226_157812763,chr3_157812226_157812763,chr3_157812226_157812763,chr3_157812226_157812763,chr3_157823158_157823817,chr4_111543401_111544463,chr4_111543401_111544463,chr4_…	GATA3,GATA4,HAND2,ISL1,MEF2C,PITX2,POU4F1,SHOX2,TBX20
GO Biological Process	GO:0021514	ventral spinal cord interneuron differentiation	122	6.18174e-121	7.9763e-117	6.53795e-119	2.8979	103	126	1.61832e-05	0.208812	0.00165724	0.159469	4	17	chr11_20184487_20184718,chr11_20184487_20184718,chr11_20184487_20184718,chr11_20184487_20184718,chr11_20184487_20184718,chr11_20184487_20184718,chr11_20184487_20184718,chr11_20184487_20184718,chr11_20184487_20184718,chr11_20184487_20184718,chr11_20184487_20184718,chr11_20184487_20184718,chr11_20184487_20184718,chr11_20184487_20184718,chr11_20184487_20184718,chr11_20184487_20184718,chr11_20184487_…	DBX1,NKX6-1,PAX6,SOX1
GO Biological Process	GO:0061309	cardiac neural crest cell development involved in outflow tract morphogenesis	278	8.37477e-32	1.0806e-27	3.88704e-30	1.45176	32	123	1.58937e-05	0.205076	0.00166729	0.0562834	3	6	chr4_111543401_111544463,chr4_111543401_111544463,chr4_111543401_111544463,chr4_111543401_111544463,chr4_111543401_111544463,chr4_111543401_111544463,chr4_174443366_174443865,chr4_174443366_174443865,chr4_174443366_174443865,chr4_174443366_174443865,chr4_174443366_174443865,chr4_174443366_174443865,chr4_174443366_174443865,chr4_174443366_174443865,chr4_174443366_174443865,chr4_174443366_174443865…	HAND2,PITX2,TWIST1
GO Biological Process	GO:0003230	cardiac atrium development	426	8.524e-07	0.0109985	2.58181e-05	5.34899	20	127	1.77223e-05	0.228671	0.00180056	0.32832	5	35	chr3_157812226_157812763,chr3_157812226_157812763,chr3_157812226_157812763,chr3_157812226_157812763,chr3_157812226_157812763,chr3_157812226_157812763,chr3_157812226_157812763,chr3_157812226_157812763,chr3_157812226_157812763,chr3_157823158_157823817,chr4_111543401_111544463,chr4_111543401_111544463,chr4_111543401_111544463,chr4_111543401_111544463,chr4_111543401_111544463,chr4_111543401_111544463…	GATA4,ISL1,PITX2,SHOX2,TBX20
GO Molecular Function	GO:0001046	core promoter sequence-specific DNA binding	38	1.8864e-34	7.87006e-31	2.07107e-32	13.8818	79	22	9.91187e-06	0.0413523	0.00187965	1.04124	8	111	chr10_8094093_8097331,chr11_31838674_31839947,chr13_112720927_112721425,chr13_112720927_112721425,chr13_112720927_112721425,chr13_112720927_112721425,chr13_112720927_112721425,chr13_112720927_112721425,chr13_112720927_112721425,chr13_112720927_112721425,chr13_112720927_112721425,chr13_112720927_112721425,chr13_112720927_112721425,chr13_112720927_112721425,chr13_112720927_112721425,chr13_112720927…	GATA3,MEF2C,NRF1,PAX6,PDX1,SOX1,TBR1,TFAP2A
GO Biological Process	GO:0009798	axis specification	145	6.20158e-106	8.0019e-102	5.51855e-104	11.7724	144	128	1.89794e-05	0.244891	0.00191321	0.825489	7	88	chr11_31838674_31839947,chr17_35060451_35060679,chr17_35060451_35060679,chr17_35060451_35060679,chr17_35060451_35060679,chr17_35060451_35060679,chr17_35060451_35060679,chr17_35060451_35060679,chr17_35060451_35060679,chr17_35060451_35060679,chr17_35060451_35060679,chr17_35060451_35060679,chr17_35060451_35060679,chr17_35060451_35060679,chr17_35060451_35060679,chr17_35060451_35060679,chr17_35060451_…	COBL,HOXD8,LHX1,PAX6,PITX2,SFRP1,T
GO Biological Process	GO:0035282	segmentation	135	1.36251e-113	1.75805e-109	1.30226e-111	12.8125	155	129	2.19887e-05	0.28372	0.00219938	0.84425	7	90	chr13_53424812_53425257,chr13_53424812_53425257,chr13_53424812_53425257,chr13_53424812_53425257,chr13_53424812_53425257,chr13_53424812_53425257,chr13_53424812_53425257,chr13_53424812_53425257,chr13_53424812_53425257,chr13_53424812_53425257,chr13_53424812_53425257,chr13_53424812_53425257,chr13_53424812_53425257,chr13_53424812_53425257,chr13_53424812_53425257,chr13_53424812_53425257,chr13_53424812_…	COBL,HOXD8,IRX2,LHX1,PCDH8,SFRP1,T
GO Biological Process	GO:0060021	palate development	427	8.85628e-07	0.0114272	2.67617e-05	14.3658	36	132	2.53809e-05	0.32749	0.00248098	0.863012	7	92	chr10_118896363_118897280,chr10_118896363_118897280,chr12_85673860_85674531,chr2_200334402_200335148,chr2_200334402_200335148,chr2_200334402_200335148,chr4_174443366_174443865,chr4_174443366_174443865,chr4_174443366_174443865,chr4_174443366_174443865,chr4_174443366_174443865,chr4_174443366_174443865,chr4_174443366_174443865,chr4_174443366_174443865,chr4_174443366_174443865,chr4_174443366_17444386…	ALX1,HAND2,MEF2C,SATB2,TFAP2A,TWIST1,VAX1
GO Biological Process	GO:0051099	positive regulation of binding	330	1.89358e-17	2.44329e-13	7.4039e-16	18.2271	64	133	2.8764e-05	0.371141	0.00279054	1.56655	9	167	chr10_8094093_8097331,chr13_28493404_28494996,chr13_79170146_79170959,chr13_79182095_79182205,chr13_79182095_79182205,chr4_111543401_111544463,chr4_111543401_111544463,chr4_111543401_111544463,chr4_111543401_111544463,chr4_111543401_111544463,chr4_111543401_111544463,chr4_147557774_147558544,chr4_147557774_147558544,chr4_147557774_147558544,chr4_147557774_147558544,chr4_147557774_147558544,chr4_1…	GATA3,HAND2,ISL1,MEF2C,PDX1,PITX2,POU4F1,POU4F2,TWIST1
GO Biological Process	GO:0048646	anatomical structure formation involved in morphogenesis	290	2.41501e-26	3.11609e-22	1.07451e-24	94.1001	204	134	2.91461e-05	0.376072	0.00280651	7.69206	21	820	chr10_8094093_8097331,chr11_31838674_31839947,chr11_79151719_79152112,chr11_79151719_79152112,chr11_79151719_79152112,chr12_85673860_85674531,chr13_53424812_53425257,chr13_53424812_53425257,chr13_53424812_53425257,chr13_53424812_53425257,chr13_53424812_53425257,chr13_53424812_53425257,chr13_53424812_53425257,chr13_53424812_53425257,chr13_53424812_53425257,chr13_53424812_53425257,chr13_53424812_53…	ALX1,CASQ2,COBL,GATA3,HAND2,IRX2,ISL1,LHX1,MEF2C,NR2E1,PAX6,PCDH8,PITX2,PRDM14,SFRP1,T,TBR1,TBX20,TENM4,TFAP2A,TWIST1
GO Biological Process	GO:1904888	cranial skeletal system development	140	6.0389e-111	7.792e-107	5.56571e-109	9.93801	140	136	3.26439e-05	0.421204	0.00309709	0.609736	6	65	chr16_54972078_54972647,chr17_35060451_35060679,chr17_35060451_35060679,chr17_35060451_35060679,chr17_35060451_35060679,chr17_35060451_35060679,chr17_35060451_35060679,chr17_35060451_35060679,chr17_35060451_35060679,chr17_35060451_35060679,chr17_35060451_35060679,chr17_35060451_35060679,chr17_35060451_35060679,chr17_35060451_35060679,chr17_35060451_35060679,chr17_35060451_35060679,chr17_35060451_…	IRX5,LHX1,MEF2C,PAX5,TFAP2A,TWIST1
GO Biological Process	GO:0022603	regulation of anatomical structure morphogenesis	258	4.1551e-38	5.36132e-34	2.07803e-36	107.222	250	135	3.26141e-05	0.42082	0.00311719	8.98658	23	958	chr10_128994030_128995134,chr10_8094093_8097331,chr11_79151719_79152112,chr11_79151719_79152112,chr11_79151719_79152112,chr12_54367250_54367822,chr17_35060451_35060679,chr17_35060451_35060679,chr17_35060451_35060679,chr17_35060451_35060679,chr17_35060451_35060679,chr17_35060451_35060679,chr17_35060451_35060679,chr17_35060451_35060679,chr17_35060451_35060679,chr17_35060451_35060679,chr17_35060451_…	BARHL2,DOCK1,EPHA7,GATA3,GATA4,HAND2,HOXC11,HSPB1,ISL1,LHX1,MEF2C,NKX6-1,NPPB,NR2E1,POU4F2,RNF207,SFRP1,SHOX2,TBR1,TBX18,TENM4,TFAP2A,TWIST1
GO Biological Process	GO:0031175	neuron projection development	291	3.79261e-26	4.8936e-22	1.68165e-24	81.2099	185	137	3.45251e-05	0.445478	0.00325166	5.4501	17	581	chr10_118896363_118897280,chr10_118896363_118897280,chr10_8094093_8097331,chr11_31838674_31839947,chr13_110438256_110439234,chr13_110438256_110439234,chr13_110438256_110439234,chr13_79170146_79170959,chr13_79182095_79182205,chr13_79182095_79182205,chr14_29234671_29237202,chr17_35060451_35060679,chr17_35060451_35060679,chr17_35060451_35060679,chr17_35060451_35060679,chr17_35060451_35060679,chr17_3…	ATOH1,CNTNAP2,COBL,CTNNA2,EPHA7,FEZF1,FOXG1,GATA3,IRS2,ISL1,LHX1,LMX1A,NR2E1,PAX6,POU4F1,POU4F2,VAX1
GO Biological Process	GO:0061333	renal tubule morphogenesis	158	3.98207e-96	5.13806e-92	3.25194e-94	12.657	139	140	3.88345e-05	0.501082	0.00357916	0.628498	6	67	chr10_8094093_8097331,chr17_35060451_35060679,chr17_35060451_35060679,chr17_35060451_35060679,chr17_35060451_35060679,chr17_35060451_35060679,chr17_35060451_35060679,chr17_35060451_35060679,chr17_35060451_35060679,chr17_35060451_35060679,chr17_35060451_35060679,chr17_35060451_35060679,chr17_35060451_35060679,chr17_35060451_35060679,chr17_35060451_35060679,chr17_35060451_35060679,chr17_35060451_35…	GATA3,HOXD11,IRX2,LHX1,MEF2C,PBX1
GO Biological Process	GO:0003151	outflow tract morphogenesis	413	2.07072e-07	0.00267185	6.46937e-06	13.486	36	141	4.22645e-05	0.545339	0.00386765	0.637878	6	68	chr4_111543401_111544463,chr4_111543401_111544463,chr4_111543401_111544463,chr4_111543401_111544463,chr4_111543401_111544463,chr4_111543401_111544463,chr4_174443366_174443865,chr4_174443366_174443865,chr4_174443366_174443865,chr4_174443366_174443865,chr4_174443366_174443865,chr4_174443366_174443865,chr4_174443366_174443865,chr4_174443366_174443865,chr4_174443366_174443865,chr4_174443366_174443865…	HAND2,ISL1,MEF2C,PITX2,TBX20,TWIST1
GO Biological Process	GO:0061308	cardiac neural crest cell development involved in heart development	279	4.59582e-31	5.92998e-27	2.12544e-29	1.53481	32	142	4.38899e-05	0.566312	0.00398811	0.0750445	3	8	chr4_111543401_111544463,chr4_111543401_111544463,chr4_111543401_111544463,chr4_111543401_111544463,chr4_111543401_111544463,chr4_111543401_111544463,chr4_174443366_174443865,chr4_174443366_174443865,chr4_174443366_174443865,chr4_174443366_174443865,chr4_174443366_174443865,chr4_174443366_174443865,chr4_174443366_174443865,chr4_174443366_174443865,chr4_174443366_174443865,chr4_174443366_174443865…	HAND2,PITX2,TWIST1
GO Biological Process	GO:0007422	peripheral nervous system development	395	2.09599e-08	0.000270445	6.84671e-07	9.51504	31	143	4.5933e-05	0.592673	0.00414457	0.647259	6	69	chr13_79170146_79170959,chr13_79182095_79182205,chr13_79182095_79182205,chr2_176971304_176972812,chr2_176971304_176972812,chr2_176986956_176987918,chr4_174443366_174443865,chr4_174443366_174443865,chr4_174443366_174443865,chr4_174443366_174443865,chr4_174443366_174443865,chr4_174443366_174443865,chr4_174443366_174443865,chr4_174443366_174443865,chr4_174443366_174443865,chr4_174443366_174443865,ch…	EDNRB,HAND2,HOXD10,HOXD9,ISL1,POU4F1
GO Biological Process	GO:0021513	spinal cord dorsal/ventral patterning	129	1.34508e-114	1.73556e-110	1.34539e-112	3.35191	103	144	4.79495e-05	0.618692	0.00429647	0.206372	4	22	chr11_20184487_20184718,chr11_20184487_20184718,chr11_20184487_20184718,chr11_20184487_20184718,chr11_20184487_20184718,chr11_20184487_20184718,chr11_20184487_20184718,chr11_20184487_20184718,chr11_20184487_20184718,chr11_20184487_20184718,chr11_20184487_20184718,chr11_20184487_20184718,chr11_20184487_20184718,chr11_20184487_20184718,chr11_20184487_20184718,chr11_20184487_20184718,chr11_20184487_…	DBX1,NKX6-1,PAX6,SOX1
GO Molecular Function	GO:0070888	E-box binding	48	1.39984e-14	5.84013e-11	1.21669e-12	4.93147	30	23	2.67859e-05	0.111751	0.00485872	0.356461	5	38	chr10_8094093_8097331,chr11_2290953_2292914,chr4_113441608_113442709,chr4_113445029_113445388,chr4_174443366_174443865,chr4_174443366_174443865,chr4_174443366_174443865,chr4_174443366_174443865,chr4_174443366_174443865,chr4_174443366_174443865,chr4_174443366_174443865,chr4_174443366_174443865,chr4_174443366_174443865,chr4_174443366_174443865,chr4_174443366_174443865,chr4_174443366_174443865,chr4_…	ASCL2,GATA3,HAND2,NEUROG2,TWIST1
GO Biological Process	GO:0048592	eye morphogenesis	95	2.33167e-143	3.00855e-139	3.1669e-141	21.5256	215	146	5.88853e-05	0.759797	0.00520409	1.33204	8	142	chr11_31838674_31839947,chr13_112720927_112721425,chr13_112720927_112721425,chr13_112720927_112721425,chr13_112720927_112721425,chr13_112720927_112721425,chr13_112720927_112721425,chr13_112720927_112721425,chr13_112720927_112721425,chr13_112720927_112721425,chr13_112720927_112721425,chr13_112720927_112721425,chr13_112720927_112721425,chr13_112720927_112721425,chr13_112720927_112721425,chr13_11272…	FOXE3,IRX5,LHX1,PAX6,PITX2,SOX1,TFAP2A,TWIST1
GO Biological Process	GO:0021871	forebrain regionalization	75	1.36078e-160	1.75582e-156	2.34109e-158	3.80186	136	147	6.86401e-05	0.885663	0.00602492	0.225133	4	24	chr10_119301464_119302540,chr11_31838674_31839947,chr17_35060451_35060679,chr17_35060451_35060679,chr17_35060451_35060679,chr17_35060451_35060679,chr17_35060451_35060679,chr17_35060451_35060679,chr17_35060451_35060679,chr17_35060451_35060679,chr17_35060451_35060679,chr17_35060451_35060679,chr17_35060451_35060679,chr17_35060451_35060679,chr17_35060451_35060679,chr17_35060451_35060679,chr17_3506045…	EMX2,FEZF1,LHX1,PAX6
GO Biological Process	GO:0021511	spinal cord patterning	138	2.10214e-111	2.71239e-107	1.9655e-109	3.60785	103	147	6.86401e-05	0.885663	0.00602492	0.225133	4	24	chr11_20184487_20184718,chr11_20184487_20184718,chr11_20184487_20184718,chr11_20184487_20184718,chr11_20184487_20184718,chr11_20184487_20184718,chr11_20184487_20184718,chr11_20184487_20184718,chr11_20184487_20184718,chr11_20184487_20184718,chr11_20184487_20184718,chr11_20184487_20184718,chr11_20184487_20184718,chr11_20184487_20184718,chr11_20184487_20184718,chr11_20184487_20184718,chr11_20184487_…	DBX1,NKX6-1,PAX6,SOX1
GO Biological Process	GO:2000677	regulation of transcription regulatory region DNA binding	277	2.09682e-32	2.70553e-28	9.76726e-31	6.23132	54	149	7.64647e-05	0.986624	0.00662164	0.440886	5	47	chr10_8094093_8097331,chr13_79170146_79170959,chr13_79182095_79182205,chr13_79182095_79182205,chr4_147557774_147558544,chr4_147557774_147558544,chr4_147557774_147558544,chr4_147557774_147558544,chr4_147557774_147558544,chr4_147557774_147558544,chr4_147557774_147558544,chr4_147557774_147558544,chr4_147557774_147558544,chr4_147557774_147558544,chr4_147557774_147558544,chr4_147557774_147558544,chr4_…	GATA3,HAND2,POU4F1,POU4F2,TWIST1
GO Biological Process	GO:2000179	positive regulation of neural precursor cell proliferation	101	2.86669e-138	3.69889e-134	3.66227e-136	6.19965	140	150	8.47126e-05	1	0.00728698	0.450267	5	48	chr11_31838674_31839947,chr14_29234671_29237202,chr17_35060451_35060679,chr17_35060451_35060679,chr17_35060451_35060679,chr17_35060451_35060679,chr17_35060451_35060679,chr17_35060451_35060679,chr17_35060451_35060679,chr17_35060451_35060679,chr17_35060451_35060679,chr17_35060451_35060679,chr17_35060451_35060679,chr17_35060451_35060679,chr17_35060451_35060679,chr17_35060451_35060679,chr17_35060451_…	FOXG1,LHX1,NR2E1,OTP,PAX6
GO Biological Process	GO:0072080	nephron tubule development	171	5.08427e-90	6.56024e-86	3.8364e-88	14.1307	139	151	8.53979e-05	1	0.00729728	0.722303	6	77	chr10_8094093_8097331,chr17_35060451_35060679,chr17_35060451_35060679,chr17_35060451_35060679,chr17_35060451_35060679,chr17_35060451_35060679,chr17_35060451_35060679,chr17_35060451_35060679,chr17_35060451_35060679,chr17_35060451_35060679,chr17_35060451_35060679,chr17_35060451_35060679,chr17_35060451_35060679,chr17_35060451_35060679,chr17_35060451_35060679,chr17_35060451_35060679,chr17_35060451_35…	GATA3,HOXD11,IRX2,LHX1,MEF2C,PBX1
GO Molecular Function	GO:0003712	transcription cofactor activity	11	2.06788e-166	8.62719e-163	7.8429e-164	54.0407	332	25	4.37368e-05	0.18247	0.0072988	4.99984	16	533	chr10_8094093_8097331,chr12_85673860_85674531,chr13_79170146_79170959,chr13_79182095_79182205,chr13_79182095_79182205,chr15_68120757_68121563,chr17_35060451_35060679,chr17_35060451_35060679,chr17_35060451_35060679,chr17_35060451_35060679,chr17_35060451_35060679,chr17_35060451_35060679,chr17_35060451_35060679,chr17_35060451_35060679,chr17_35060451_35060679,chr17_35060451_35060679,chr17_35060451_35…	ALX1,CBX4,GATA3,GATA4,HAND2,ISL1,LHX1,PIAS1,PITX2,POU4F1,POU4F2,SKOR1,TBX18,TBX20,TFAP2A,VGLL2
GO Biological Process	GO:0061325	cell proliferation involved in outflow tract morphogenesis	249	7.54872e-40	9.74011e-36	3.91169e-38	0.619956	30	152	8.74939e-05	1	0.0074272	0.0187611	2	2	chr4_111543401_111544463,chr4_111543401_111544463,chr4_111543401_111544463,chr4_111543401_111544463,chr4_111543401_111544463,chr4_111543401_111544463,chr4_174443366_174443865,chr4_174443366_174443865,chr4_174443366_174443865,chr4_174443366_174443865,chr4_174443366_174443865,chr4_174443366_174443865,chr4_174443366_174443865,chr4_174443366_174443865,chr4_174443366_174443865,chr4_174443366_174443865…	HAND2,PITX2
GO Biological Process	GO:0060577	pulmonary vein morphogenesis	432	1.8644e-06	0.0240563	5.5686e-05	0.551444	7	152	8.74939e-05	1	0.0074272	0.0187611	2	2	chr4_111543401_111544463,chr4_111543401_111544463,chr4_111543401_111544463,chr4_111543401_111544463,chr4_111543401_111544463,chr4_111543401_111544463,chr7_35293080_35294658	PITX2,TBX20
GO Biological Process	GO:2000177	regulation of neural precursor cell proliferation	142	7.82552e-110	1.00973e-105	7.11075e-108	10.5683	142	154	9.18024e-05	1	0.00769173	0.731684	6	78	chr10_118896363_118897280,chr10_118896363_118897280,chr11_31838674_31839947,chr14_29234671_29237202,chr17_35060451_35060679,chr17_35060451_35060679,chr17_35060451_35060679,chr17_35060451_35060679,chr17_35060451_35060679,chr17_35060451_35060679,chr17_35060451_35060679,chr17_35060451_35060679,chr17_35060451_35060679,chr17_35060451_35060679,chr17_35060451_35060679,chr17_35060451_35060679,chr17_35060…	FOXG1,LHX1,NR2E1,OTP,PAX6,VAX1
GO Biological Process	GO:0061072	iris morphogenesis	459	1.69418e-05	0.2186	0.000476252	1.07709	8	155	9.27566e-05	1	0.00772154	0.0938056	3	10	chr11_31838674_31839947,chr1_47882265_47882936,chr4_111543401_111544463,chr4_111543401_111544463,chr4_111543401_111544463,chr4_111543401_111544463,chr4_111543401_111544463,chr4_111543401_111544463	FOXE3,PAX6,PITX2
GO Biological Process	GO:0042471	ear morphogenesis	177	5.47931e-86	7.06995e-82	3.99432e-84	17.5689	147	157	9.48941e-05	1	0.00779884	1.06	7	113	chr10_8094093_8097331,chr14_29234671_29237202,chr17_72919704_72920187,chr17_72919704_72920187,chr17_72919704_72920187,chr17_72919704_72920187,chr17_72919704_72920187,chr17_72919704_72920187,chr17_72919704_72920187,chr17_72919704_72920187,chr17_72919704_72920187,chr17_72919704_72920187,chr17_72919704_72920187,chr17_72919704_72920187,chr17_72919704_72920187,chr17_72919704_72920187,chr17_72919704_72…	ATOH1,FOXG1,GATA3,TFAP2A,TWIST1,USH1G,ZIC1
GO Molecular Function	GO:0000989	transcription factor activity, transcription factor binding	13	2.23106e-153	9.30797e-150	7.15998e-151	60.2765	333	27	5.04731e-05	0.210574	0.00779903	5.61895	17	599	chr10_8094093_8097331,chr12_85673860_85674531,chr13_79170146_79170959,chr13_79182095_79182205,chr13_79182095_79182205,chr15_68120757_68121563,chr17_35060451_35060679,chr17_35060451_35060679,chr17_35060451_35060679,chr17_35060451_35060679,chr17_35060451_35060679,chr17_35060451_35060679,chr17_35060451_35060679,chr17_35060451_35060679,chr17_35060451_35060679,chr17_35060451_35060679,chr17_35060451_35…	ALX1,CBX4,GATA3,GATA4,HAND2,ISL1,LHX1,PIAS1,PITX2,POU4F1,POU4F2,SKOR1,T,TBX18,TBX20,TFAP2A,VGLL2
GO Biological Process	GO:0061326	renal tubule development	172	1.75558e-88	2.26523e-84	1.31699e-86	14.5308	139	159	0.000105757	1	0.00858224	0.750445	6	80	chr10_8094093_8097331,chr17_35060451_35060679,chr17_35060451_35060679,chr17_35060451_35060679,chr17_35060451_35060679,chr17_35060451_35060679,chr17_35060451_35060679,chr17_35060451_35060679,chr17_35060451_35060679,chr17_35060451_35060679,chr17_35060451_35060679,chr17_35060451_35060679,chr17_35060451_35060679,chr17_35060451_35060679,chr17_35060451_35060679,chr17_35060451_35060679,chr17_35060451_35…	GATA3,HOXD11,IRX2,LHX1,MEF2C,PBX1
GO Molecular Function	GO:0000988	transcription factor activity, protein binding	14	5.20051e-152	2.16965e-148	1.54975e-149	60.9284	333	28	5.94474e-05	0.248015	0.00885767	5.694	17	607	chr10_8094093_8097331,chr12_85673860_85674531,chr13_79170146_79170959,chr13_79182095_79182205,chr13_79182095_79182205,chr15_68120757_68121563,chr17_35060451_35060679,chr17_35060451_35060679,chr17_35060451_35060679,chr17_35060451_35060679,chr17_35060451_35060679,chr17_35060451_35060679,chr17_35060451_35060679,chr17_35060451_35060679,chr17_35060451_35060679,chr17_35060451_35060679,chr17_35060451_35…	ALX1,CBX4,GATA3,GATA4,HAND2,ISL1,LHX1,PIAS1,PITX2,POU4F1,POU4F2,SKOR1,T,TBX18,TBX20,TFAP2A,VGLL2
GO Biological Process	GO:0003207	cardiac chamber formation	319	4.66904e-19	6.02446e-15	1.88855e-17	2.5357	27	160	0.000126661	1	0.0102144	0.103186	3	11	chr4_174443366_174443865,chr4_174443366_174443865,chr4_174443366_174443865,chr4_174443366_174443865,chr4_174443366_174443865,chr4_174443366_174443865,chr4_174443366_174443865,chr4_174443366_174443865,chr4_174443366_174443865,chr4_174443366_174443865,chr4_174443366_174443865,chr4_174443366_174443865,chr4_174443366_174443865,chr4_174443366_174443865,chr4_174443366_174443865,chr4_174443366_174443865…	HAND2,MEF2C,TBX20
GO Biological Process	GO:0009855	determination of bilateral symmetry	398	3.00607e-08	0.000387873	9.74556e-07	13.0125	37	162	0.00013132	1	0.0104594	1.11629	7	119	chr15_58357319_58357989,chr4_111543401_111544463,chr4_111543401_111544463,chr4_111543401_111544463,chr4_111543401_111544463,chr4_111543401_111544463,chr4_111543401_111544463,chr4_174443366_174443865,chr4_174443366_174443865,chr4_174443366_174443865,chr4_174443366_174443865,chr4_174443366_174443865,chr4_174443366_174443865,chr4_174443366_174443865,chr4_174443366_174443865,chr4_174443366_174443865,…	ALDH1A2,GATA4,HAND2,MEF2C,PITX2,T,TBX20
GO Biological Process	GO:0009799	specification of symmetry	405	6.09777e-08	0.000786795	1.9427e-06	13.3911	37	163	0.000138367	1	0.0109531	1.12567	7	120	chr15_58357319_58357989,chr4_111543401_111544463,chr4_111543401_111544463,chr4_111543401_111544463,chr4_111543401_111544463,chr4_111543401_111544463,chr4_111543401_111544463,chr4_174443366_174443865,chr4_174443366_174443865,chr4_174443366_174443865,chr4_174443366_174443865,chr4_174443366_174443865,chr4_174443366_174443865,chr4_174443366_174443865,chr4_174443366_174443865,chr4_174443366_174443865,…	ALDH1A2,GATA4,HAND2,MEF2C,PITX2,T,TBX20
GO Biological Process	GO:0051962	positive regulation of nervous system development	250	9.80036e-40	1.26454e-35	5.05816e-38	71.5582	199	165	0.000144336	1	0.0112871	4.40886	14	470	chr11_31838674_31839947,chr11_79151719_79152112,chr11_79151719_79152112,chr11_79151719_79152112,chr14_29234671_29237202,chr17_35060451_35060679,chr17_35060451_35060679,chr17_35060451_35060679,chr17_35060451_35060679,chr17_35060451_35060679,chr17_35060451_35060679,chr17_35060451_35060679,chr17_35060451_35060679,chr17_35060451_35060679,chr17_35060451_35060679,chr17_35060451_35060679,chr17_35060451_…	ATOH1,COBL,FEZF1,FOXG1,LHX1,LIN28A,LRRTM1,MEF2C,NKX6-1,OTP,PAX6,POU4F2,SHOX2,TENM4
GO Biological Process	GO:0001657	ureteric bud development	130	2.05588e-114	2.6527e-110	2.04054e-112	15.3588	166	168	0.000148091	1	0.0113739	0.797348	6	85	chr10_8094093_8097331,chr17_35060451_35060679,chr17_35060451_35060679,chr17_35060451_35060679,chr17_35060451_35060679,chr17_35060451_35060679,chr17_35060451_35060679,chr17_35060451_35060679,chr17_35060451_35060679,chr17_35060451_35060679,chr17_35060451_35060679,chr17_35060451_35060679,chr17_35060451_35060679,chr17_35060451_35060679,chr17_35060451_35060679,chr17_35060451_35060679,chr17_35060451_35…	GATA3,HOXD11,LHX1,PBX1,SFRP1,SIM1
GO Biological Process	GO:0072164	mesonephric tubule development	131	2.71445e-114	3.50246e-110	2.67363e-112	15.3866	166	169	0.000157974	1	0.0120612	0.806728	6	86	chr10_8094093_8097331,chr17_35060451_35060679,chr17_35060451_35060679,chr17_35060451_35060679,chr17_35060451_35060679,chr17_35060451_35060679,chr17_35060451_35060679,chr17_35060451_35060679,chr17_35060451_35060679,chr17_35060451_35060679,chr17_35060451_35060679,chr17_35060451_35060679,chr17_35060451_35060679,chr17_35060451_35060679,chr17_35060451_35060679,chr17_35060451_35060679,chr17_35060451_35…	GATA3,HOXD11,LHX1,PBX1,SFRP1,SIM1
GO Biological Process	GO:0072178	nephric duct morphogenesis	69	7.06761e-163	9.11933e-159	1.32164e-160	3.4496	134	170	0.000167717	1	0.0127297	0.112567	3	12	chr10_8094093_8097331,chr17_35060451_35060679,chr17_35060451_35060679,chr17_35060451_35060679,chr17_35060451_35060679,chr17_35060451_35060679,chr17_35060451_35060679,chr17_35060451_35060679,chr17_35060451_35060679,chr17_35060451_35060679,chr17_35060451_35060679,chr17_35060451_35060679,chr17_35060451_35060679,chr17_35060451_35060679,chr17_35060451_35060679,chr17_35060451_35060679,chr17_35060451_35…	EPHA7,GATA3,LHX1
GO Biological Process	GO:0001823	mesonephros development	136	3.18422e-112	4.1086e-108	3.02103e-110	15.8727	166	173	0.000202844	1	0.0151289	0.84425	6	90	chr10_8094093_8097331,chr17_35060451_35060679,chr17_35060451_35060679,chr17_35060451_35060679,chr17_35060451_35060679,chr17_35060451_35060679,chr17_35060451_35060679,chr17_35060451_35060679,chr17_35060451_35060679,chr17_35060451_35060679,chr17_35060451_35060679,chr17_35060451_35060679,chr17_35060451_35060679,chr17_35060451_35060679,chr17_35060451_35060679,chr17_35060451_35060679,chr17_35060451_35…	GATA3,HOXD11,LHX1,PBX1,SFRP1,SIM1
GO Biological Process	GO:0060973	cell migration involved in heart development	284	1.99027e-29	2.56804e-25	9.0424e-28	1.73684	32	175	0.000216531	1	0.0159651	0.121947	3	13	chr4_111543401_111544463,chr4_111543401_111544463,chr4_111543401_111544463,chr4_111543401_111544463,chr4_111543401_111544463,chr4_111543401_111544463,chr4_174443366_174443865,chr4_174443366_174443865,chr4_174443366_174443865,chr4_174443366_174443865,chr4_174443366_174443865,chr4_174443366_174443865,chr4_174443366_174443865,chr4_174443366_174443865,chr4_174443366_174443865,chr4_174443366_174443865…	HAND2,PITX2,TWIST1
GO Biological Process	GO:0046189	phenol-containing compound biosynthetic process	344	4.45009e-14	5.74196e-10	1.66917e-12	4.79562	29	176	0.000219087	1	0.0160618	0.300178	4	32	chr10_8094093_8097331,chr15_28344273_28344730,chr15_28344273_28344730,chr15_28344273_28344730,chr4_174443366_174443865,chr4_174443366_174443865,chr4_174443366_174443865,chr4_174443366_174443865,chr4_174443366_174443865,chr4_174443366_174443865,chr4_174443366_174443865,chr4_174443366_174443865,chr4_174443366_174443865,chr4_174443366_174443865,chr4_174443366_174443865,chr4_174443366_174443865,chr4_…	GATA3,GPR37,HAND2,OCA2
GO Biological Process	GO:0042472	inner ear morphogenesis	160	1.27402e-94	1.64387e-90	1.02742e-92	14.588	145	177	0.000257211	1	0.0187502	0.881773	6	94	chr10_8094093_8097331,chr14_29234671_29237202,chr17_72919704_72920187,chr17_72919704_72920187,chr17_72919704_72920187,chr17_72919704_72920187,chr17_72919704_72920187,chr17_72919704_72920187,chr17_72919704_72920187,chr17_72919704_72920187,chr17_72919704_72920187,chr17_72919704_72920187,chr17_72919704_72920187,chr17_72919704_72920187,chr17_72919704_72920187,chr17_72919704_72920187,chr17_72919704_72…	ATOH1,FOXG1,GATA3,TFAP2A,USH1G,ZIC1
GO Biological Process	GO:0001756	somitogenesis	92	1.04036e-143	1.34238e-139	1.45911e-141	7.64682	153	183	0.000266788	1	0.0188107	0.572214	5	61	chr13_53424812_53425257,chr13_53424812_53425257,chr13_53424812_53425257,chr13_53424812_53425257,chr13_53424812_53425257,chr13_53424812_53425257,chr13_53424812_53425257,chr13_53424812_53425257,chr13_53424812_53425257,chr13_53424812_53425257,chr13_53424812_53425257,chr13_53424812_53425257,chr13_53424812_53425257,chr13_53424812_53425257,chr13_53424812_53425257,chr13_53424812_53425257,chr13_53424812_…	COBL,LHX1,PCDH8,SFRP1,T
GO Molecular Function	GO:0003713	transcription coactivator activity	54	1.38505e-09	5.77843e-06	1.07008e-07	29.1086	66	30	0.00013615	0.568018	0.0189339	2.83293	11	302	chr10_8094093_8097331,chr13_79170146_79170959,chr13_79182095_79182205,chr13_79182095_79182205,chr15_68120757_68121563,chr4_111543401_111544463,chr4_111543401_111544463,chr4_111543401_111544463,chr4_111543401_111544463,chr4_111543401_111544463,chr4_111543401_111544463,chr4_147557774_147558544,chr4_147557774_147558544,chr4_147557774_147558544,chr4_147557774_147558544,chr4_147557774_147558544,chr4_1…	GATA3,GATA4,HAND2,ISL1,PIAS1,PITX2,POU4F1,POU4F2,TBX20,TFAP2A,VGLL2
GO Biological Process	GO:0072009	nephron epithelium development	187	9.32876e-81	1.20369e-76	6.43684e-79	16.7392	139	185	0.000272443	1	0.0190018	0.891153	6	95	chr10_8094093_8097331,chr17_35060451_35060679,chr17_35060451_35060679,chr17_35060451_35060679,chr17_35060451_35060679,chr17_35060451_35060679,chr17_35060451_35060679,chr17_35060451_35060679,chr17_35060451_35060679,chr17_35060451_35060679,chr17_35060451_35060679,chr17_35060451_35060679,chr17_35060451_35060679,chr17_35060451_35060679,chr17_35060451_35060679,chr17_35060451_35060679,chr17_35060451_35…	GATA3,HOXD11,IRX2,LHX1,MEF2C,PBX1
GO Biological Process	GO:2000826	regulation of heart morphogenesis	377	1.69948e-09	2.19284e-05	5.81654e-08	7.0606	28	186	0.00027845	1	0.0193163	0.318939	4	34	chr1_6266360_6266416,chr4_174443366_174443865,chr4_174443366_174443865,chr4_174443366_174443865,chr4_174443366_174443865,chr4_174443366_174443865,chr4_174443366_174443865,chr4_174443366_174443865,chr4_174443366_174443865,chr4_174443366_174443865,chr4_174443366_174443865,chr4_174443366_174443865,chr4_174443366_174443865,chr4_174443366_174443865,chr4_174443366_174443865,chr4_174443366_174443865,chr…	HAND2,ISL1,RNF207,TWIST1
GO Biological Process	GO:0061371	determination of heart left/right asymmetry	352	3.37209e-12	4.35101e-08	1.23608e-10	6.14961	30	187	0.000288009	1	0.0198726	0.581595	5	62	chr4_174443366_174443865,chr4_174443366_174443865,chr4_174443366_174443865,chr4_174443366_174443865,chr4_174443366_174443865,chr4_174443366_174443865,chr4_174443366_174443865,chr4_174443366_174443865,chr4_174443366_174443865,chr4_174443366_174443865,chr4_174443366_174443865,chr4_174443366_174443865,chr4_174443366_174443865,chr4_174443366_174443865,chr4_174443366_174443865,chr4_174443366_174443865…	GATA4,HAND2,MEF2C,T,TBX20
GO Biological Process	GO:0072078	nephron tubule morphogenesis	154	3.39516e-98	4.38078e-94	2.84466e-96	11.7088	137	189	0.000310486	1	0.0211968	0.590975	5	63	chr10_8094093_8097331,chr17_35060451_35060679,chr17_35060451_35060679,chr17_35060451_35060679,chr17_35060451_35060679,chr17_35060451_35060679,chr17_35060451_35060679,chr17_35060451_35060679,chr17_35060451_35060679,chr17_35060451_35060679,chr17_35060451_35060679,chr17_35060451_35060679,chr17_35060451_35060679,chr17_35060451_35060679,chr17_35060451_35060679,chr17_35060451_35060679,chr17_35060451_35…	GATA3,HOXD11,IRX2,LHX1,PBX1
GO Biological Process	GO:0043066	negative regulation of apoptotic process	280	3.92339e-30	5.06235e-26	1.80798e-28	75.7867	186	190	0.000336133	1	0.022827	7.85153	19	837	chr10_8094093_8097331,chr13_110438256_110439234,chr13_110438256_110439234,chr13_110438256_110439234,chr13_28493404_28494996,chr13_79170146_79170959,chr13_79182095_79182205,chr13_79182095_79182205,chr15_68120757_68121563,chr17_77783551_77784110,chr17_77783551_77784110,chr17_77783551_77784110,chr17_77783551_77784110,chr17_77783551_77784110,chr17_77783551_77784110,chr17_77783551_77784110,chr17_77783…	ATOH1,CBX4,EDNRB,FOXE3,GATA3,HAND2,HSPB1,IRS2,ISL1,MEF2C,NKX2-6,NR2E1,PDX1,PIAS1,PIM3,POU4F1,SFRP1,TFAP2A,TWIST1
GO Biological Process	GO:0072176	nephric duct development	78	8.4788e-159	1.09402e-154	1.40259e-156	3.70605	134	191	0.000339754	1	0.0229521	0.140708	3	15	chr10_8094093_8097331,chr17_35060451_35060679,chr17_35060451_35060679,chr17_35060451_35060679,chr17_35060451_35060679,chr17_35060451_35060679,chr17_35060451_35060679,chr17_35060451_35060679,chr17_35060451_35060679,chr17_35060451_35060679,chr17_35060451_35060679,chr17_35060451_35060679,chr17_35060451_35060679,chr17_35060451_35060679,chr17_35060451_35060679,chr17_35060451_35060679,chr17_35060451_35…	EPHA7,GATA3,LHX1
GO Biological Process	GO:0000578	embryonic axis specification	91	5.65279e-146	7.2938e-142	8.01516e-144	4.90285	136	194	0.00034855	1	0.0231822	0.3377	4	36	chr17_35060451_35060679,chr17_35060451_35060679,chr17_35060451_35060679,chr17_35060451_35060679,chr17_35060451_35060679,chr17_35060451_35060679,chr17_35060451_35060679,chr17_35060451_35060679,chr17_35060451_35060679,chr17_35060451_35060679,chr17_35060451_35060679,chr17_35060451_35060679,chr17_35060451_35060679,chr17_35060451_35060679,chr17_35060451_35060679,chr17_35060451_35060679,chr17_35060451_…	COBL,HOXD8,LHX1,T
GO Molecular Function	GO:0001047	core promoter binding	43	3.34415e-25	1.39518e-21	3.2446e-23	19.3663	79	31	0.000174927	0.729795	0.0235418	1.55717	8	166	chr10_8094093_8097331,chr11_31838674_31839947,chr13_112720927_112721425,chr13_112720927_112721425,chr13_112720927_112721425,chr13_112720927_112721425,chr13_112720927_112721425,chr13_112720927_112721425,chr13_112720927_112721425,chr13_112720927_112721425,chr13_112720927_112721425,chr13_112720927_112721425,chr13_112720927_112721425,chr13_112720927_112721425,chr13_112720927_112721425,chr13_112720927…	GATA3,MEF2C,NRF1,PAX6,PDX1,SOX1,TBR1,TFAP2A
GO Biological Process	GO:0009880	embryonic pattern specification	139	3.18873e-111	4.11441e-107	2.96001e-109	9.67949	139	195	0.000359404	1	0.0237814	0.609736	5	65	chr17_35060451_35060679,chr17_35060451_35060679,chr17_35060451_35060679,chr17_35060451_35060679,chr17_35060451_35060679,chr17_35060451_35060679,chr17_35060451_35060679,chr17_35060451_35060679,chr17_35060451_35060679,chr17_35060451_35060679,chr17_35060451_35060679,chr17_35060451_35060679,chr17_35060451_35060679,chr17_35060451_35060679,chr17_35060451_35060679,chr17_35060451_35060679,chr17_35060451_…	COBL,HOXD8,LHX1,SATB2,T
GO Biological Process	GO:0072088	nephron epithelium morphogenesis	155	3.91142e-97	5.0469e-93	3.25607e-95	11.9364	137	195	0.000359404	1	0.0237814	0.609736	5	65	chr10_8094093_8097331,chr17_35060451_35060679,chr17_35060451_35060679,chr17_35060451_35060679,chr17_35060451_35060679,chr17_35060451_35060679,chr17_35060451_35060679,chr17_35060451_35060679,chr17_35060451_35060679,chr17_35060451_35060679,chr17_35060451_35060679,chr17_35060451_35060679,chr17_35060451_35060679,chr17_35060451_35060679,chr17_35060451_35060679,chr17_35060451_35060679,chr17_35060451_35…	GATA3,HOXD11,IRX2,LHX1,PBX1
GO Biological Process	GO:0072028	nephron morphogenesis	156	4.5061e-97	5.81422e-93	3.72706e-95	11.9497	137	197	0.000385942	1	0.0252782	0.619117	5	66	chr10_8094093_8097331,chr17_35060451_35060679,chr17_35060451_35060679,chr17_35060451_35060679,chr17_35060451_35060679,chr17_35060451_35060679,chr17_35060451_35060679,chr17_35060451_35060679,chr17_35060451_35060679,chr17_35060451_35060679,chr17_35060451_35060679,chr17_35060451_35060679,chr17_35060451_35060679,chr17_35060451_35060679,chr17_35060451_35060679,chr17_35060451_35060679,chr17_35060451_35…	GATA3,HOXD11,IRX2,LHX1,PBX1
GO Biological Process	GO:0043069	negative regulation of programmed cell death	285	2.1369e-29	2.75724e-25	9.67453e-28	76.8584	186	201	0.000400783	1	0.0257279	7.9641	19	849	chr10_8094093_8097331,chr13_110438256_110439234,chr13_110438256_110439234,chr13_110438256_110439234,chr13_28493404_28494996,chr13_79170146_79170959,chr13_79182095_79182205,chr13_79182095_79182205,chr15_68120757_68121563,chr17_77783551_77784110,chr17_77783551_77784110,chr17_77783551_77784110,chr17_77783551_77784110,chr17_77783551_77784110,chr17_77783551_77784110,chr17_77783551_77784110,chr17_77783…	ATOH1,CBX4,EDNRB,FOXE3,GATA3,HAND2,HSPB1,IRS2,ISL1,MEF2C,NKX2-6,NR2E1,PDX1,PIAS1,PIM3,POU4F1,SFRP1,TFAP2A,TWIST1
GO Biological Process	GO:0001667	ameboidal-type cell migration	486	0.000176663	1	0.00469029	18.5456	36	202	0.000406097	1	0.02594	1.34142	7	143	chr12_85673860_85674531,chr13_79170146_79170959,chr4_111543401_111544463,chr4_111543401_111544463,chr4_111543401_111544463,chr4_111543401_111544463,chr4_111543401_111544463,chr4_111543401_111544463,chr4_174443366_174443865,chr4_174443366_174443865,chr4_174443366_174443865,chr4_174443366_174443865,chr4_174443366_174443865,chr4_174443366_174443865,chr4_174443366_174443865,chr4_174443366_174443865,c…	ALX1,EDNRB,HAND2,ISL1,PITX2,T,TWIST1
GO Biological Process	GO:0060548	negative regulation of cell death	294	5.42675e-25	7.00214e-21	2.38168e-23	84.5134	187	208	0.000454334	1	0.028184	8.70516	20	928	chr10_8094093_8097331,chr13_110438256_110439234,chr13_110438256_110439234,chr13_110438256_110439234,chr13_28493404_28494996,chr13_79170146_79170959,chr13_79182095_79182205,chr13_79182095_79182205,chr15_68120757_68121563,chr17_77783551_77784110,chr17_77783551_77784110,chr17_77783551_77784110,chr17_77783551_77784110,chr17_77783551_77784110,chr17_77783551_77784110,chr17_77783551_77784110,chr17_77783…	ATOH1,CBX4,EDNRB,FOXE3,GATA3,GPR37,HAND2,HSPB1,IRS2,ISL1,MEF2C,NKX2-6,NR2E1,PDX1,PIAS1,PIM3,POU4F1,SFRP1,TFAP2A,TWIST1
GO Biological Process	GO:0033189	response to vitamin A	453	1.30016e-05	0.167759	0.00037033	1.36516	9	211	0.000500803	1	0.0306249	0.159469	3	17	chr15_58357319_58357989,chr4_111543401_111544463,chr4_111543401_111544463,chr4_111543401_111544463,chr4_111543401_111544463,chr4_111543401_111544463,chr4_111543401_111544463,chr8_11561361_11562367,chr8_11561361_11562367	ALDH1A2,GATA4,PITX2
GO Biological Process	GO:0010587	miRNA catabolic process	222	1.05939e-55	1.36694e-51	6.15738e-54	0.291775	33	213	0.000518495	1	0.0314091	0.0375222	2	4	chr1_26735245_26736154,chr1_26735245_26736154,chr1_26735245_26736154,chr1_26735245_26736154,chr1_26735245_26736154,chr1_26735245_26736154,chr1_26735245_26736154,chr1_26735245_26736154,chr6_105388668_105389599,chr6_105388668_105389599,chr6_105388668_105389599,chr6_105388668_105389599,chr6_105388668_105389599,chr6_105388668_105389599,chr6_105388668_105389599,chr6_105388668_105389599,chr6_105388668_…	LIN28A,LIN28B
GO Molecular Function	GO:0001078	transcriptional repressor activity, RNA polymerase II core promoter proximal region sequence-specific binding	69	0.000683529	1	0.0413288	18.5064	34	33	0.000261357	1	0.0330419	1.24761	7	133	chr10_8094093_8097331,chr11_2290953_2292914,chr4_147557774_147558544,chr4_147557774_147558544,chr4_147557774_147558544,chr4_147557774_147558544,chr4_147557774_147558544,chr4_147557774_147558544,chr4_147557774_147558544,chr4_147557774_147558544,chr4_147557774_147558544,chr4_147557774_147558544,chr4_147557774_147558544,chr4_147557774_147558544,chr4_147557774_147558544,chr4_147557774_147558544,chr4_…	ASCL2,FEZF1,GATA3,NKX6-1,NR2E1,POU4F2,TFAP2A
GO Biological Process	GO:0035050	embryonic heart tube development	375	9.35006e-10	1.20644e-05	3.21717e-08	7.81177	30	220	0.000577522	1	0.0338717	0.6754	5	72	chr4_174443366_174443865,chr4_174443366_174443865,chr4_174443366_174443865,chr4_174443366_174443865,chr4_174443366_174443865,chr4_174443366_174443865,chr4_174443366_174443865,chr4_174443366_174443865,chr4_174443366_174443865,chr4_174443366_174443865,chr4_174443366_174443865,chr4_174443366_174443865,chr4_174443366_174443865,chr4_174443366_174443865,chr4_174443366_174443865,chr4_174443366_174443865…	GATA4,HAND2,MEF2C,NKX2-6,TBX20
GO Biological Process	GO:2000027	regulation of organ morphogenesis	200	5.62907e-69	7.26319e-65	3.63159e-67	30.8064	165	222	0.000586314	1	0.0340775	2.33576	9	249	chr10_8094093_8097331,chr12_54367250_54367822,chr17_35060451_35060679,chr17_35060451_35060679,chr17_35060451_35060679,chr17_35060451_35060679,chr17_35060451_35060679,chr17_35060451_35060679,chr17_35060451_35060679,chr17_35060451_35060679,chr17_35060451_35060679,chr17_35060451_35060679,chr17_35060451_35060679,chr17_35060451_35060679,chr17_35060451_35060679,chr17_35060451_35060679,chr17_35060451_35…	GATA3,HAND2,HOXC11,ISL1,LHX1,RNF207,SFRP1,TFAP2A,TWIST1
GO Biological Process	GO:0051216	cartilage development	450	1.06158e-05	0.136975	0.00030439	20.8355	43	221	0.000585537	1	0.0341863	1.42585	7	152	chr12_54447807_54448769,chr12_54447807_54448769,chr12_54447807_54448769,chr12_85673860_85674531,chr2_200334402_200335148,chr2_200334402_200335148,chr2_200334402_200335148,chr3_157812226_157812763,chr3_157812226_157812763,chr3_157812226_157812763,chr3_157812226_157812763,chr3_157812226_157812763,chr3_157812226_157812763,chr3_157812226_157812763,chr3_157812226_157812763,chr3_157812226_157812763,chr…	ALX1,ENSG00000273266,HAND2,HOXC4,MEF2C,SATB2,SHOX2
GO Biological Process	GO:0042423	catecholamine biosynthetic process	334	1.77554e-16	2.29098e-12	6.85923e-15	2.94959	26	223	0.000596832	1	0.0345333	0.16885	3	18	chr10_8094093_8097331,chr4_174443366_174443865,chr4_174443366_174443865,chr4_174443366_174443865,chr4_174443366_174443865,chr4_174443366_174443865,chr4_174443366_174443865,chr4_174443366_174443865,chr4_174443366_174443865,chr4_174443366_174443865,chr4_174443366_174443865,chr4_174443366_174443865,chr4_174443366_174443865,chr4_174443366_174443865,chr4_174443366_174443865,chr4_174443366_174443865,ch…	GATA3,GPR37,HAND2
GO Biological Process	GO:0007368	determination of left/right symmetry	396	2.1162e-08	0.000273053	6.89528e-07	12.2624	36	228	0.000689543	1	0.0390227	1.06	6	113	chr4_111543401_111544463,chr4_111543401_111544463,chr4_111543401_111544463,chr4_111543401_111544463,chr4_111543401_111544463,chr4_111543401_111544463,chr4_174443366_174443865,chr4_174443366_174443865,chr4_174443366_174443865,chr4_174443366_174443865,chr4_174443366_174443865,chr4_174443366_174443865,chr4_174443366_174443865,chr4_174443366_174443865,chr4_174443366_174443865,chr4_174443366_174443865…	GATA4,HAND2,MEF2C,PITX2,T,TBX20
GO Biological Process	GO:0048483	autonomic nervous system development	401	4.08386e-08	0.000526941	1.31407e-06	8.22121	28	229	0.000693907	1	0.0390982	0.403364	4	43	chr10_8094093_8097331,chr13_79170146_79170959,chr4_174443366_174443865,chr4_174443366_174443865,chr4_174443366_174443865,chr4_174443366_174443865,chr4_174443366_174443865,chr4_174443366_174443865,chr4_174443366_174443865,chr4_174443366_174443865,chr4_174443366_174443865,chr4_174443366_174443865,chr4_174443366_174443865,chr4_174443366_174443865,chr4_174443366_174443865,chr4_174443366_174443865,chr…	EDNRB,GATA3,HAND2,TFAP2A
GO Biological Process	GO:0031290	retinal ganglion cell axon guidance	370	2.4579e-10	3.17143e-06	8.57142e-09	5.58508	26	230	0.000703869	1	0.039487	0.178231	3	19	chr4_147557774_147558544,chr4_147557774_147558544,chr4_147557774_147558544,chr4_147557774_147558544,chr4_147557774_147558544,chr4_147557774_147558544,chr4_147557774_147558544,chr4_147557774_147558544,chr4_147557774_147558544,chr4_147557774_147558544,chr4_147557774_147558544,chr4_147557774_147558544,chr4_147557774_147558544,chr4_147557774_147558544,chr4_147557774_147558544,chr4_147557774_147558544…	EPHA7,ISL1,POU4F2
GO Biological Process	GO:0060065	uterus development	58	9.26816e-177	1.19587e-172	2.06185e-174	2.7891	135	234	0.000822394	1	0.0453476	0.187611	3	20	chr10_8094093_8097331,chr17_35060451_35060679,chr17_35060451_35060679,chr17_35060451_35060679,chr17_35060451_35060679,chr17_35060451_35060679,chr17_35060451_35060679,chr17_35060451_35060679,chr17_35060451_35060679,chr17_35060451_35060679,chr17_35060451_35060679,chr17_35060451_35060679,chr17_35060451_35060679,chr17_35060451_35060679,chr17_35060451_35060679,chr17_35060451_35060679,chr17_35060451_35…	GATA3,HOXA10,LHX1
GO Biological Process	GO:0060039	pericardium development	343	2.48003e-14	3.19998e-10	9.32939e-13	3.65866	26	234	0.000822394	1	0.0453476	0.187611	3	20	chr4_174443366_174443865,chr4_174443366_174443865,chr4_174443366_174443865,chr4_174443366_174443865,chr4_174443366_174443865,chr4_174443366_174443865,chr4_174443366_174443865,chr4_174443366_174443865,chr4_174443366_174443865,chr4_174443366_174443865,chr4_174443366_174443865,chr4_174443366_174443865,chr4_174443366_174443865,chr4_174443366_174443865,chr4_174443366_174443865,chr4_174443366_174443865…	HAND2,NKX2-6,TBX20
GO Biological Process	GO:0006935	chemotaxis	262	2.92944e-37	3.77985e-33	1.44269e-35	61.0663	177	240	0.000864578	1	0.0464819	4.67152	13	498	chr10_118896363_118897280,chr10_118896363_118897280,chr10_8094093_8097331,chr11_31838674_31839947,chr13_110438256_110439234,chr13_110438256_110439234,chr13_110438256_110439234,chr13_79170146_79170959,chr14_29234671_29237202,chr17_35060451_35060679,chr17_35060451_35060679,chr17_35060451_35060679,chr17_35060451_35060679,chr17_35060451_35060679,chr17_35060451_35060679,chr17_35060451_35060679,chr17_3…	ATOH1,EDNRB,EPHA7,FEZF1,FOXG1,GATA3,IRS2,ISL1,LHX1,LMX1A,PAX6,POU4F2,VAX1
GO Biological Process	GO:0061053	somite development	117	3.39712e-125	4.3833e-121	3.74641e-123	10.2471	153	241	0.000882543	1	0.0472509	0.741064	5	79	chr13_53424812_53425257,chr13_53424812_53425257,chr13_53424812_53425257,chr13_53424812_53425257,chr13_53424812_53425257,chr13_53424812_53425257,chr13_53424812_53425257,chr13_53424812_53425257,chr13_53424812_53425257,chr13_53424812_53425257,chr13_53424812_53425257,chr13_53424812_53425257,chr13_53424812_53425257,chr13_53424812_53425257,chr13_53424812_53425257,chr13_53424812_53425257,chr13_53424812_…	COBL,LHX1,PCDH8,SFRP1,T
GO Biological Process	GO:0045995	regulation of embryonic development	184	3.10533e-82	4.00681e-78	2.17761e-80	16.2895	139	244	0.000944703	1	0.049957	1.12567	6	120	chr10_8094093_8097331,chr11_79151719_79152112,chr11_79151719_79152112,chr11_79151719_79152112,chr17_35060451_35060679,chr17_35060451_35060679,chr17_35060451_35060679,chr17_35060451_35060679,chr17_35060451_35060679,chr17_35060451_35060679,chr17_35060451_35060679,chr17_35060451_35060679,chr17_35060451_35060679,chr17_35060451_35060679,chr17_35060451_35060679,chr17_35060451_35060679,chr17_35060451_35…	GATA3,LHX1,RNF207,SFRP1,TBX18,TENM4
GO Biological Process	GO:0072006	nephron development	199	9.62968e-71	1.24252e-66	6.24381e-69	20.1812	139	244	0.000944703	1	0.049957	1.12567	6	120	chr10_8094093_8097331,chr17_35060451_35060679,chr17_35060451_35060679,chr17_35060451_35060679,chr17_35060451_35060679,chr17_35060451_35060679,chr17_35060451_35060679,chr17_35060451_35060679,chr17_35060451_35060679,chr17_35060451_35060679,chr17_35060451_35060679,chr17_35060451_35060679,chr17_35060451_35060679,chr17_35060451_35060679,chr17_35060451_35060679,chr17_35060451_35060679,chr17_35060451_35…	GATA3,HOXD11,IRX2,LHX1,MEF2C,PBX1
