# Supplementary material for: DNA methylation perturbations may link altered development and aging in the lung
Source: Aging (Albany NY). 2021 Jan 19;13(2):1742–64. doi: 10.18632/aging.202544 (PMC7880367; doi:10.18632/aging.202544)
Supplement: Supplementary Table 12 [file aging-13-202544-s013.pdf]

## SUPPLEMENTARY TABLE

**Supplementary Table 12. Association between epigenetic age acceleration and adult lung tissue dataset phenotype: recent smoke cessation stratified by sex: in females and males.**

| Age Acceleration              |                          |                |
|-------------------------------|--------------------------|----------------|
| Multivariate model predictors |                          |                |
| <b>Females</b>                | <b>Estimate (95% CI)</b> | <b>P-value</b> |
| months-quit                   | -0.01 (-0.02, 0.001)     | <b>0.068</b>   |
| <b>Males</b>                  | <b>Estimate (95% CI)</b> | <b>P-value</b> |
| months-quit                   | -0.01 (-0.02, 0.01)      | 0.3            |

Note: Multivariate models were residualized for chronological age and were additionally adjusted for race, pack-years, LAA-950 and technical covariate plate.

Abbreviations: CI, confidence interval; percentage of low attenuation areas at less than - 950 Hounsfield Units (LAA-950).

Missing data: Time since quitting data (months) was missing for 1 subject without COPD.
